# Supplementary material for: GFPT2 controls immune evasion in EGFR-mutated non-small cell lung cancer
Source: Research Square preprint supplement (doi:10.21203/rs.3.rs-4203208/v1), 2024-04-26
Supplement: Supplementary file 2 [file 3f9885db4921bb53152c8f67.docx]

**
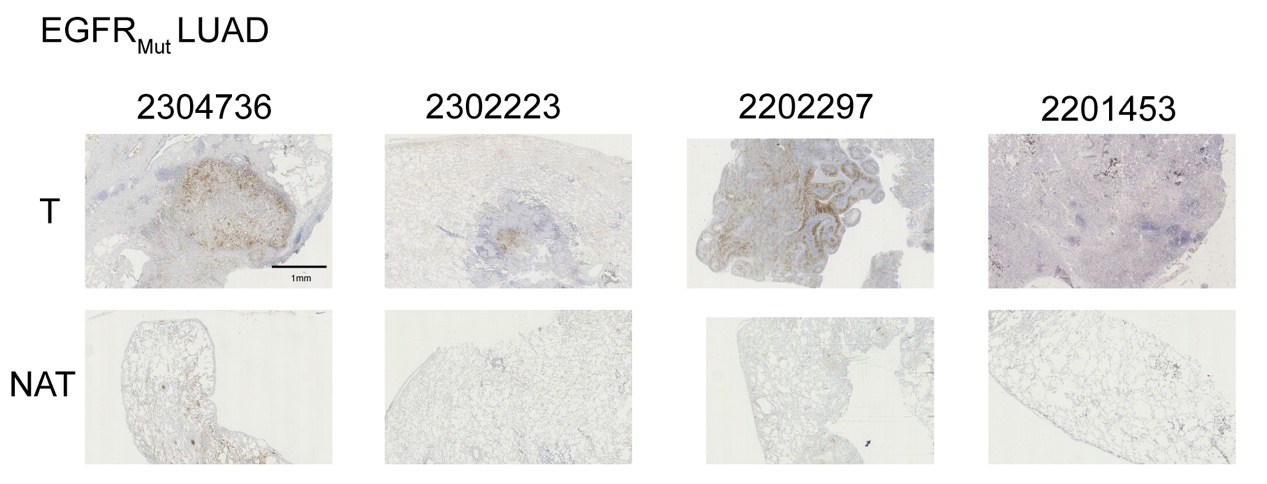
**

**Supplementary Fig 1. IHC images for GFPT2 staining of T and NAT from 4 EGFRMut LUAD patients.**

**
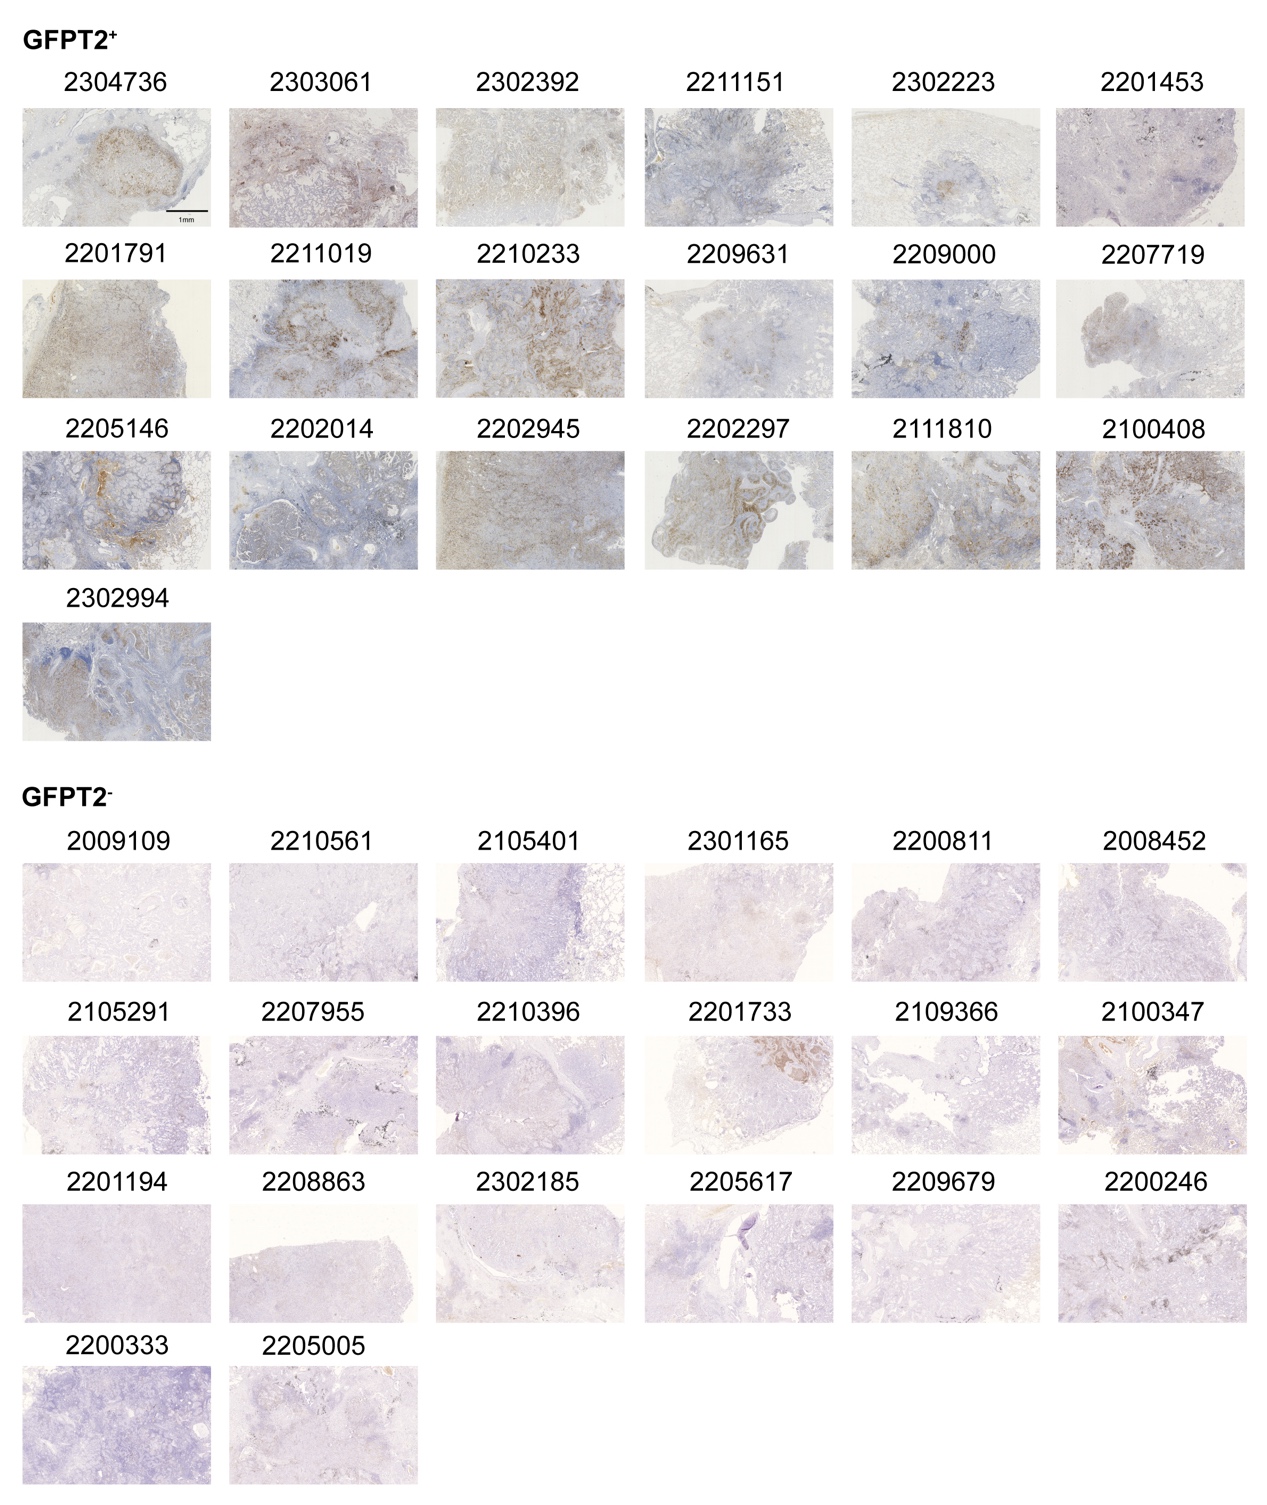
**

**Supplementary Fig 2. IHC images for GFPT2 staining of 19 paired LUAD T and NAT.**

**
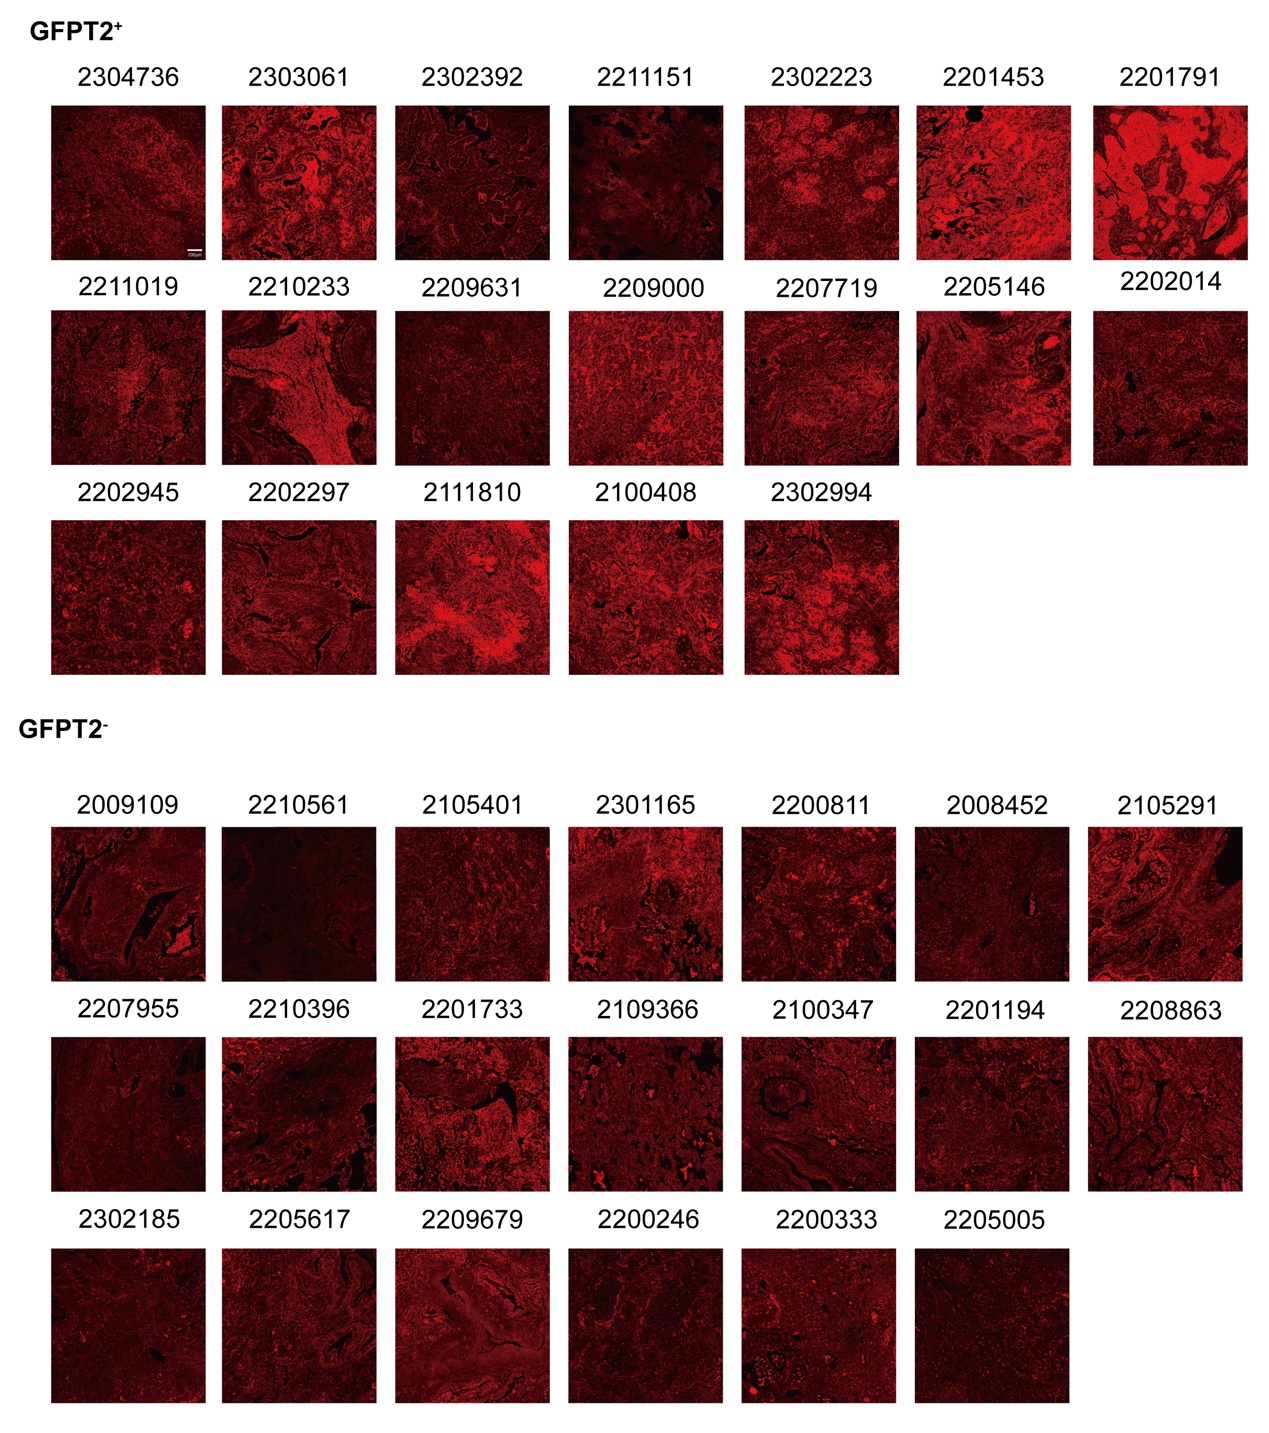
**

**Supplementary Fig 3. IF images for PHA staining of 19 GFPT2 positive expressed LUAD T and 20 GFPT2 negative expressed LUAD T.**

**
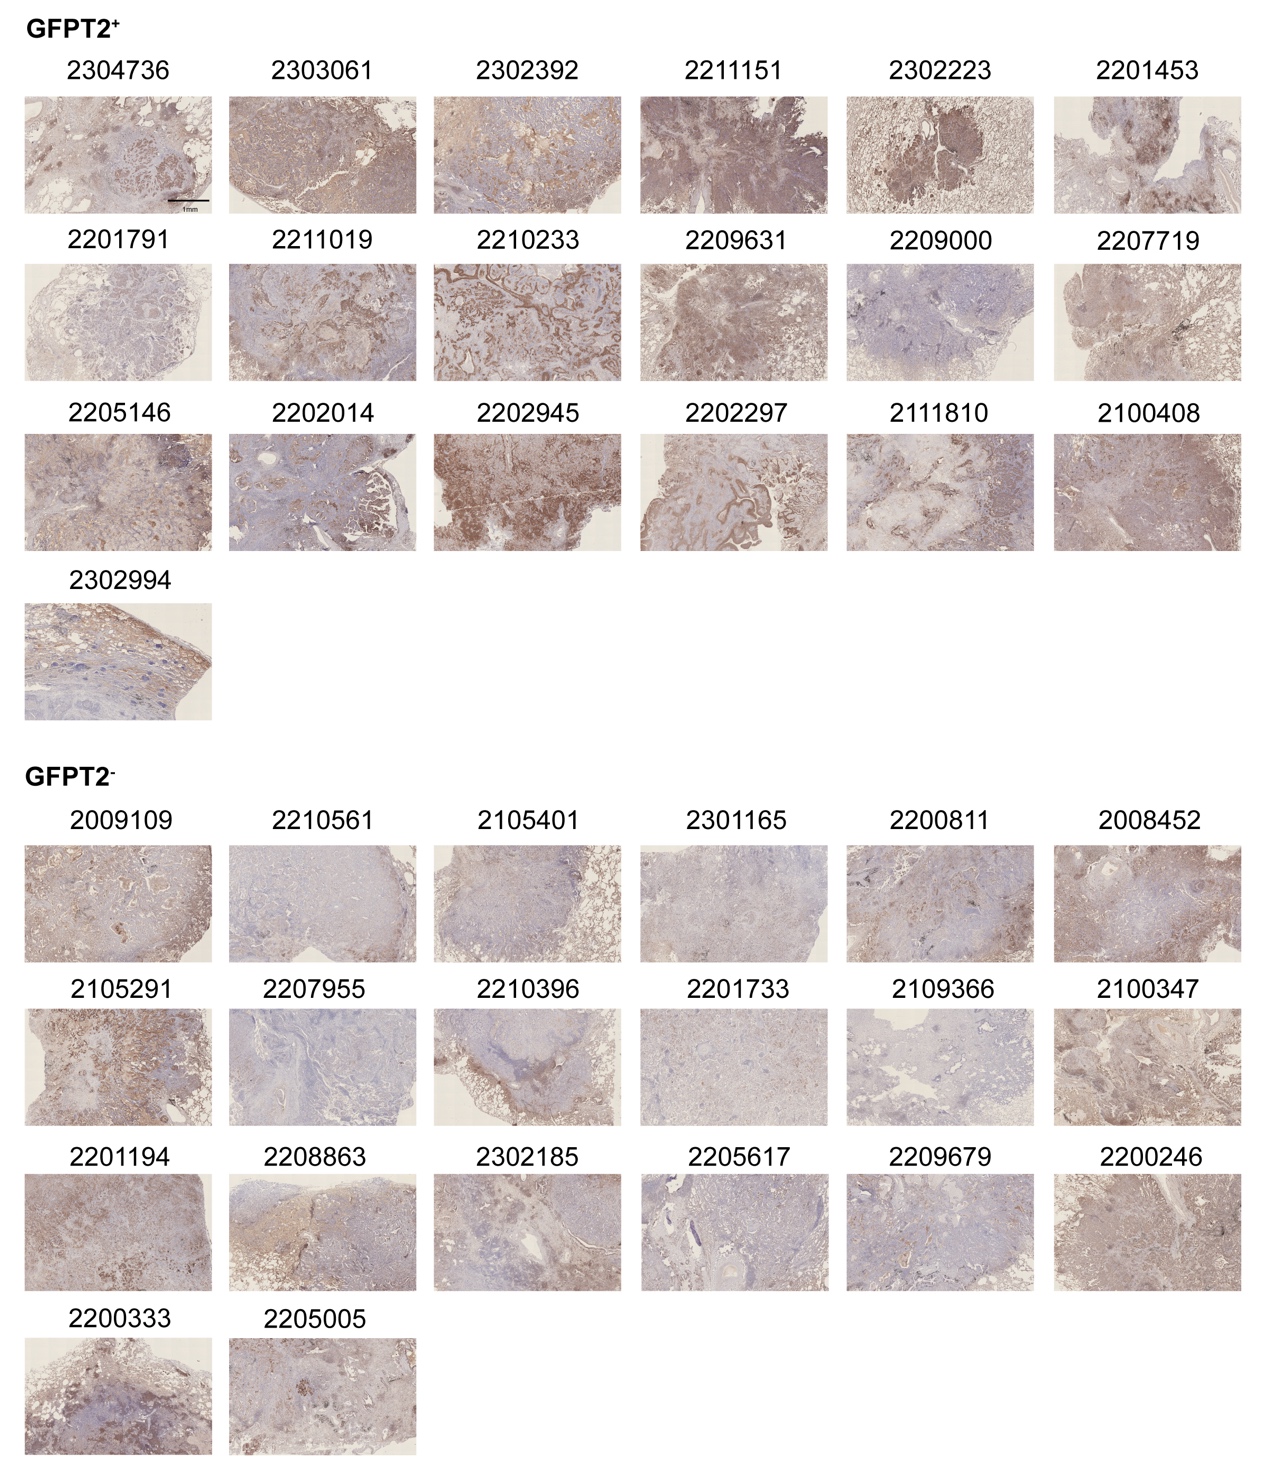
**

**Supplementary Fig 4. IHC images for pEGFR staining of 19 GFPT2 positive expressed LUAD T and 20 GFPT2 negative expressed LUAD T.**

**
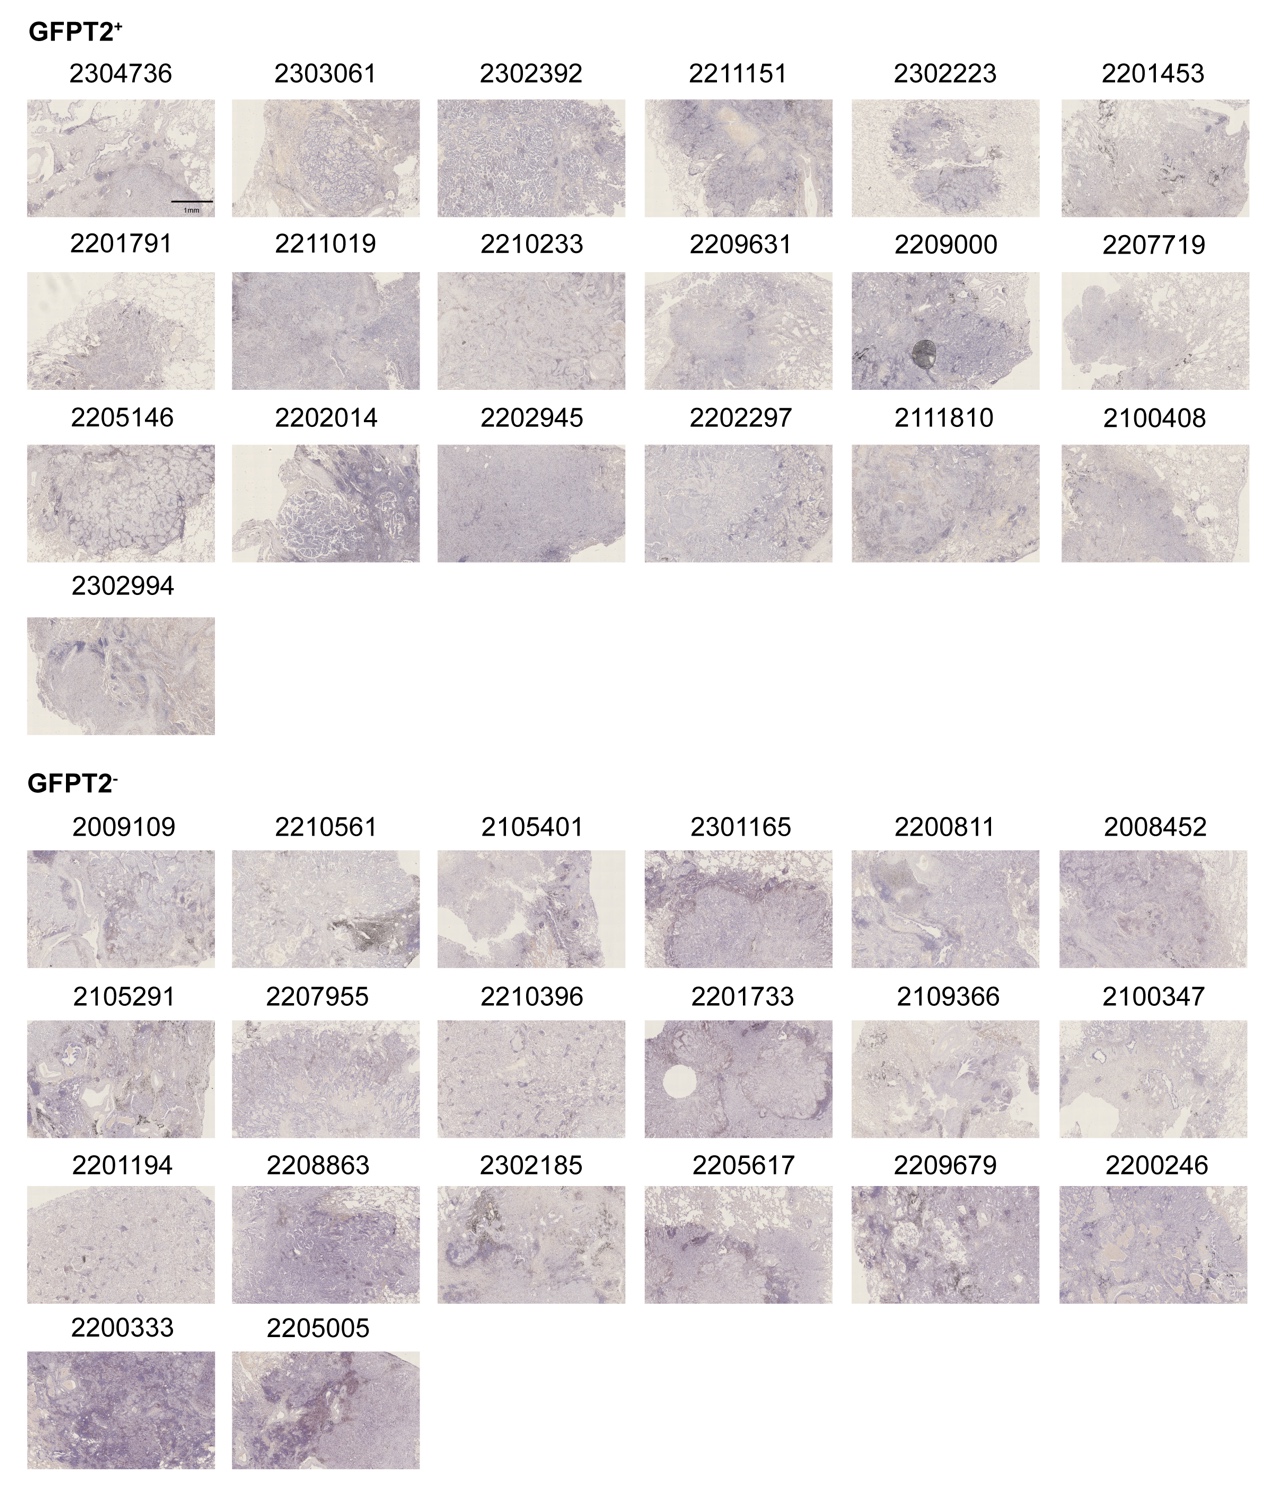
**

**Supplementary Fig 5. IHC images for CD8+T staining of 19 GFPT2 positive expressed LUAD T and 20 GFPT2 negative expressed LUAD T.**

**
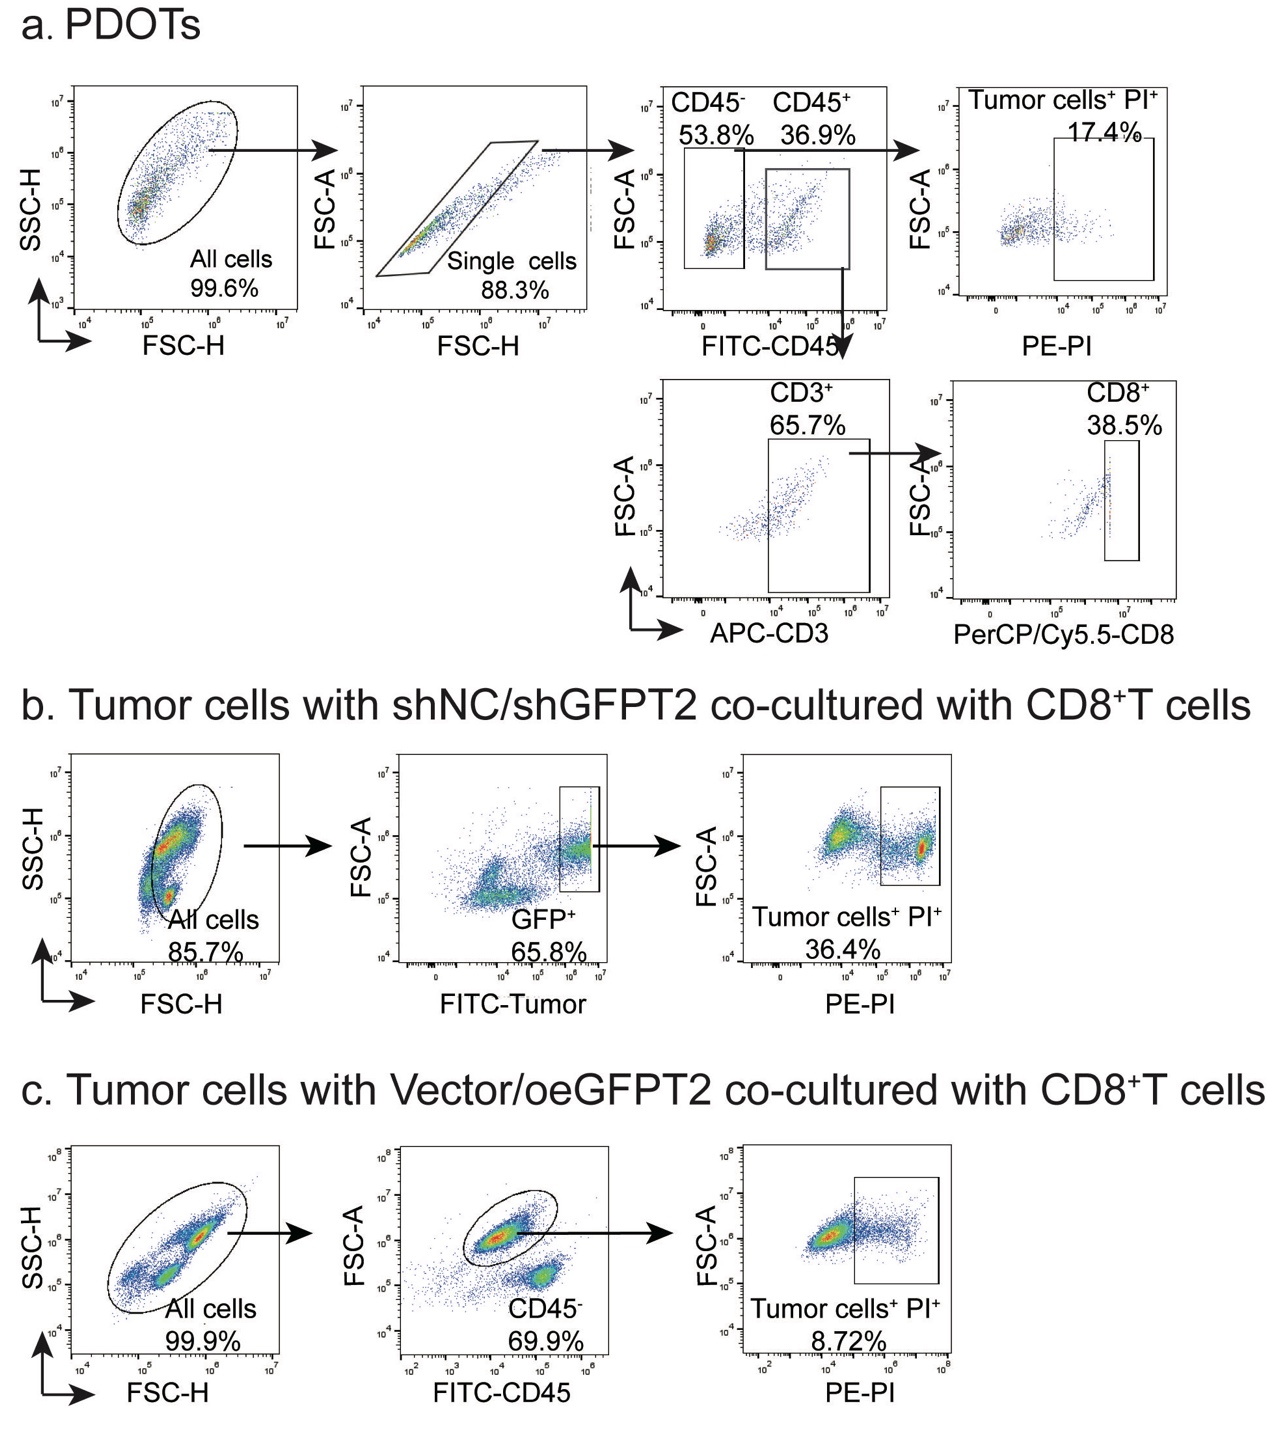
**

**Supplementary Fig 6. Flow cytometry gating strategy for PDOTs and ex vivo co-culture.**

**
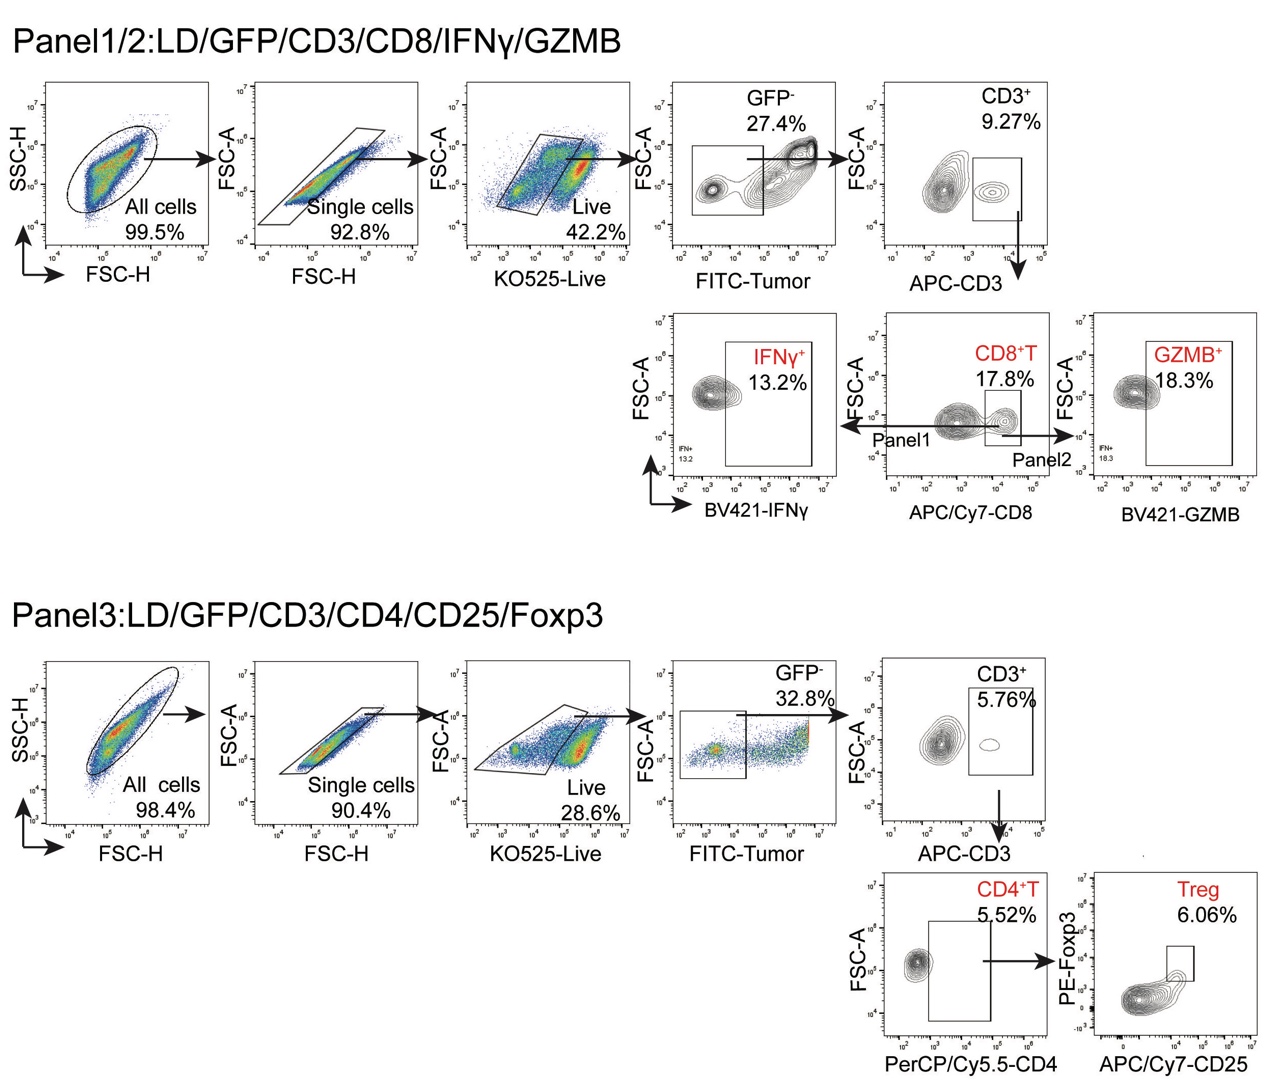
**

**Supplementary Fig 7. Flow cytometry gating strategy for tumor immune microenvironment in humanized mouse models.**

**
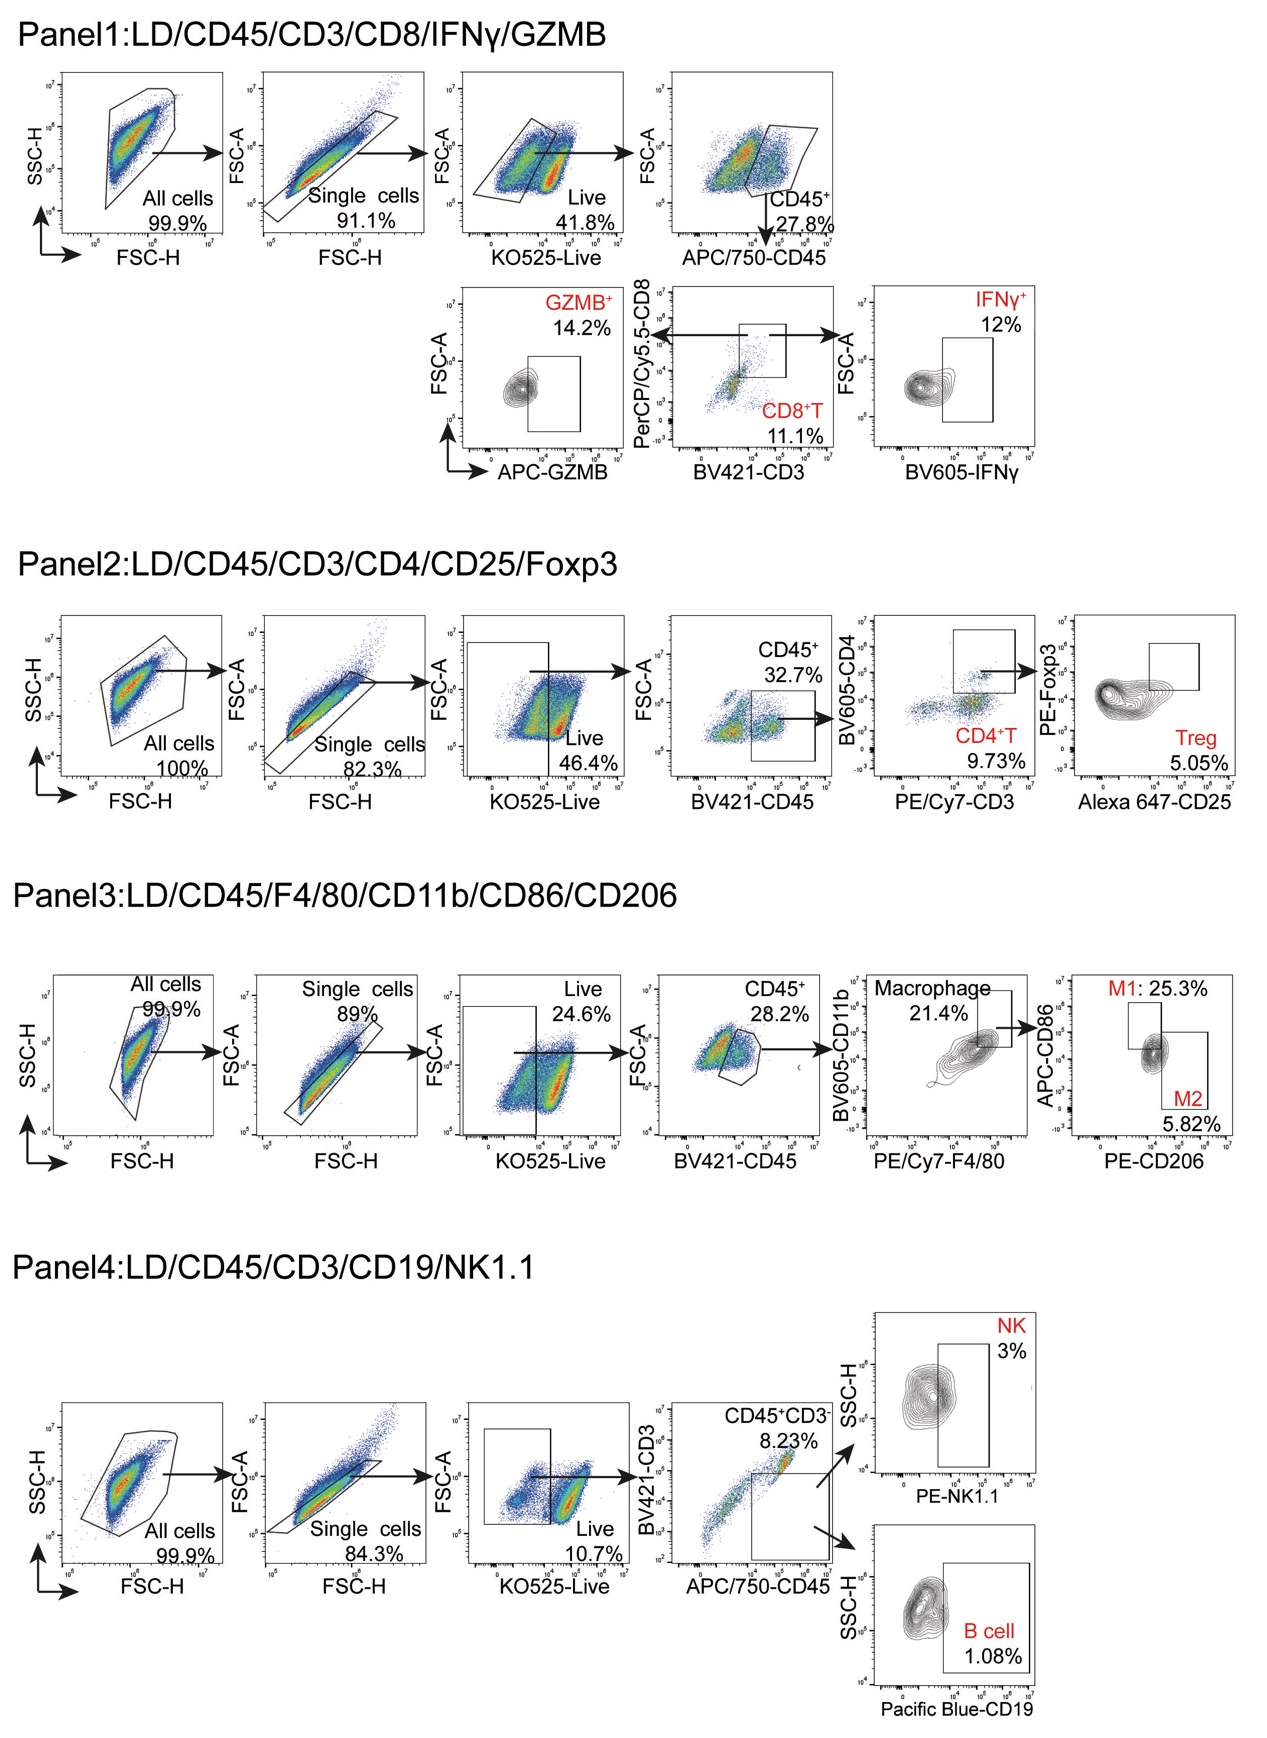
**

**Supplementary Fig 8. Flow cytometry gating strategy for the tumor immune microenvironment in fully immunocompetent mice.**

**
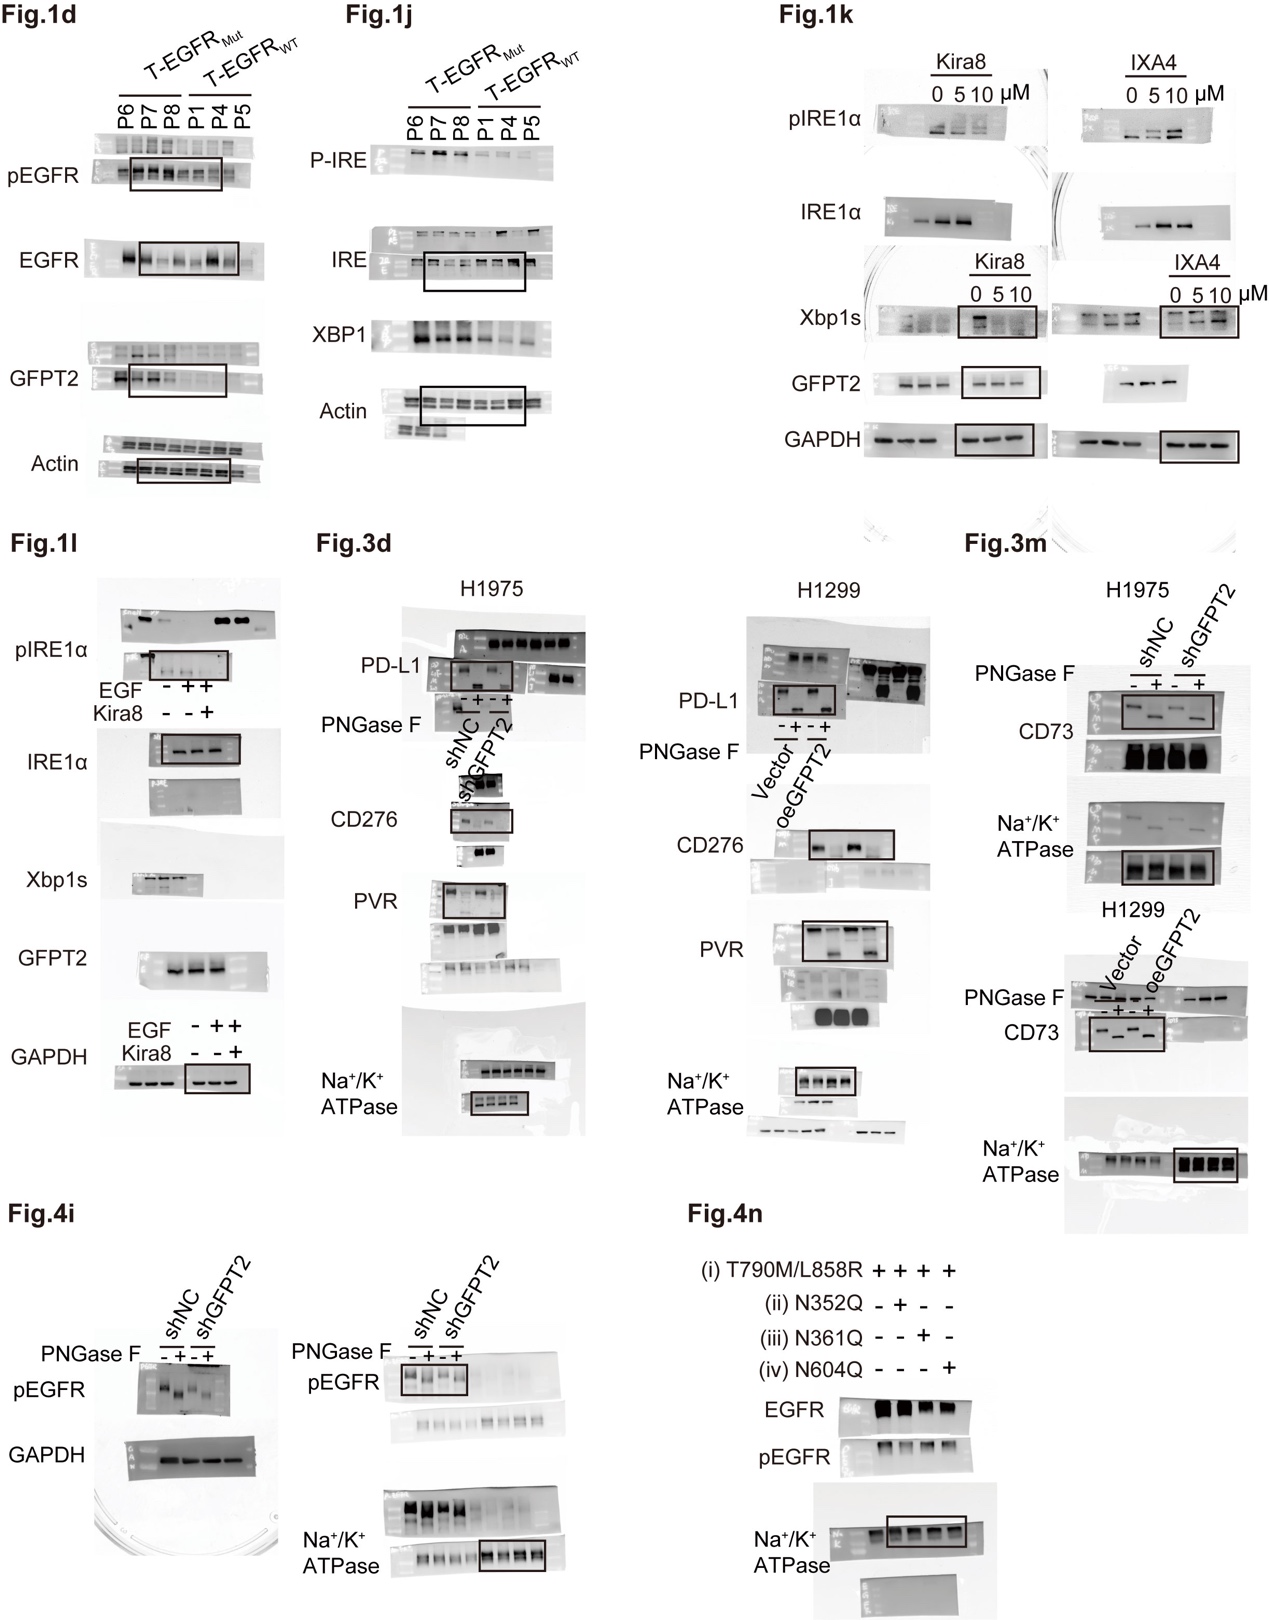
**

**Supplementary Fig 9. Original immunoblotting data related to main figures.**

**
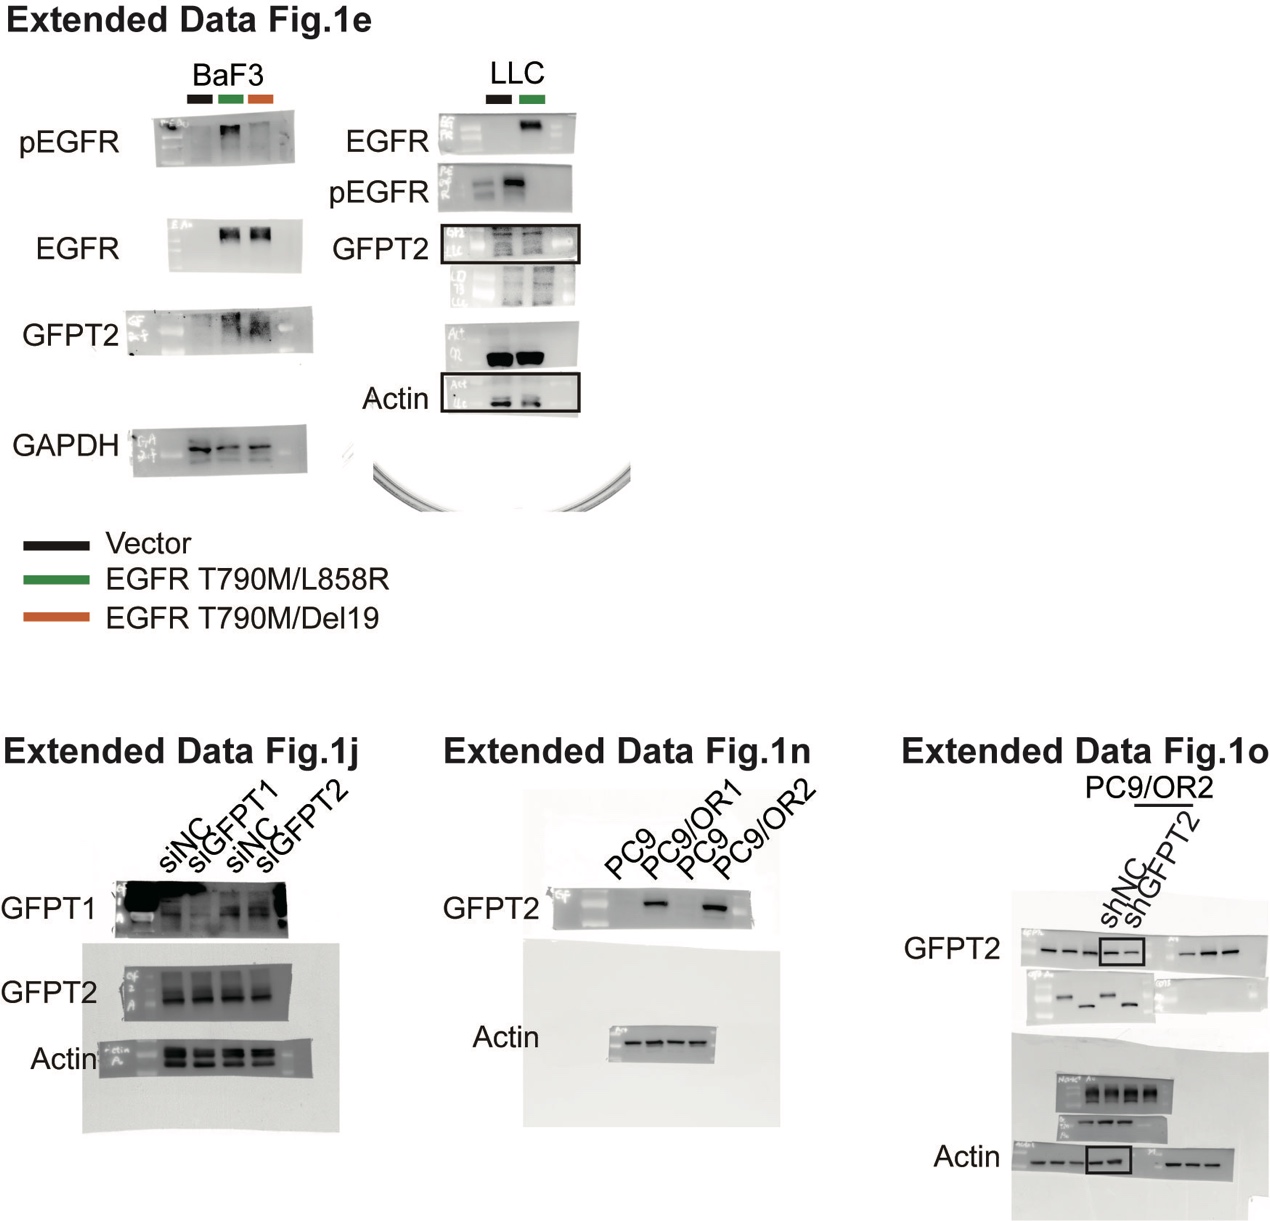
**

**Supplementary Fig 10. Original immunoblotting data related to Extended Data Fig 1.**

**
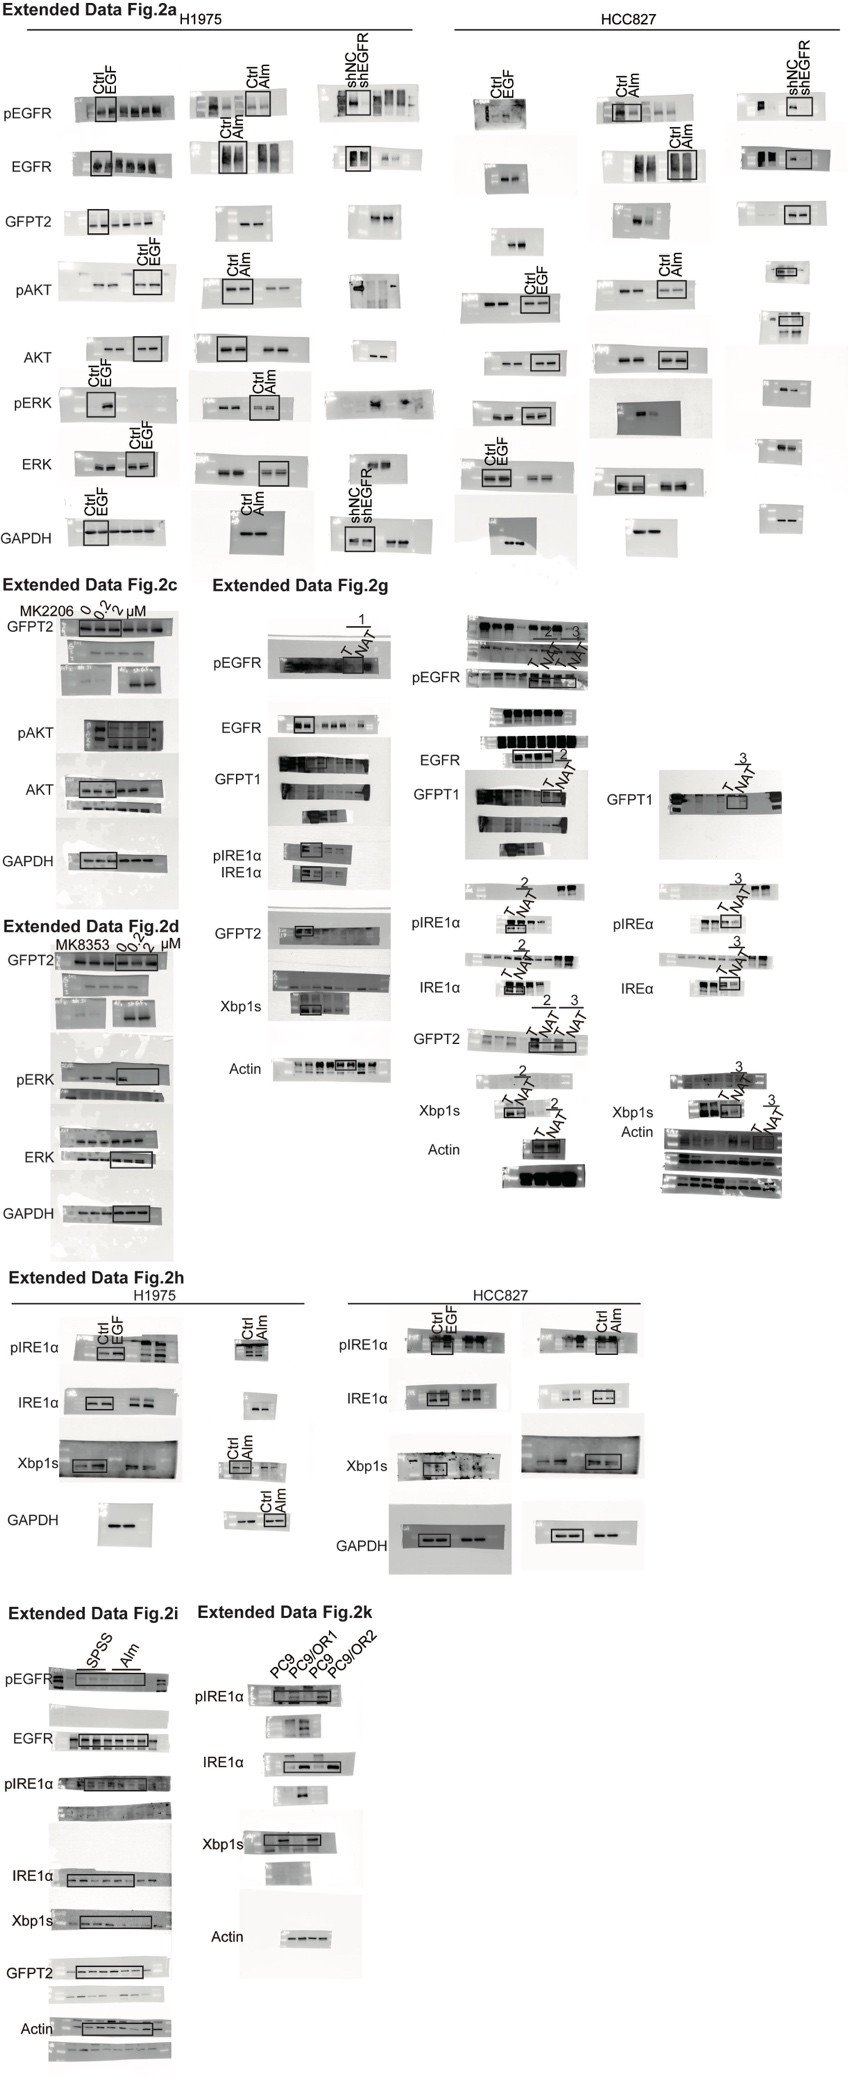
**

**Supplementary Fig 11. Original immunoblotting data related to Extended Data Fig 2.**

**
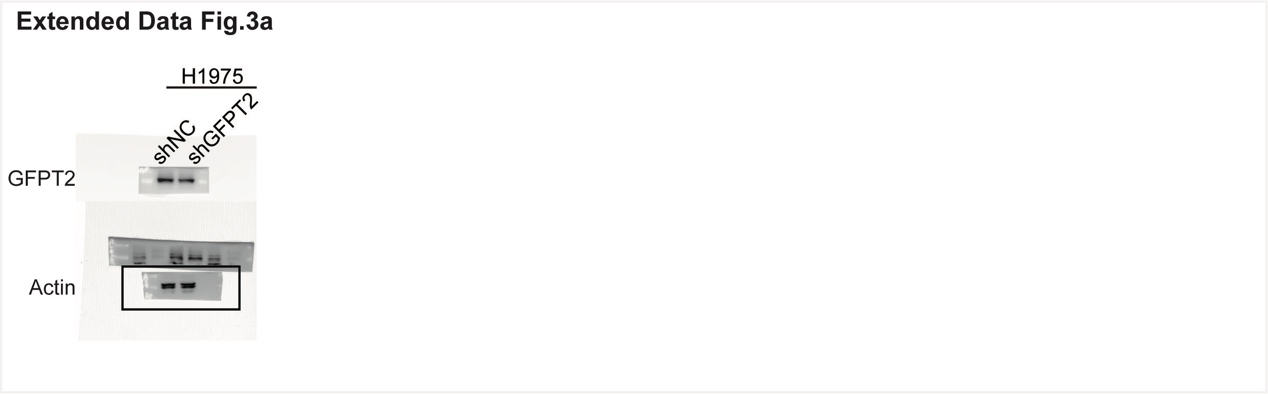
**

**Supplementary Fig 12. Original immunoblotting data related to Extended Data Fig 3.**

**
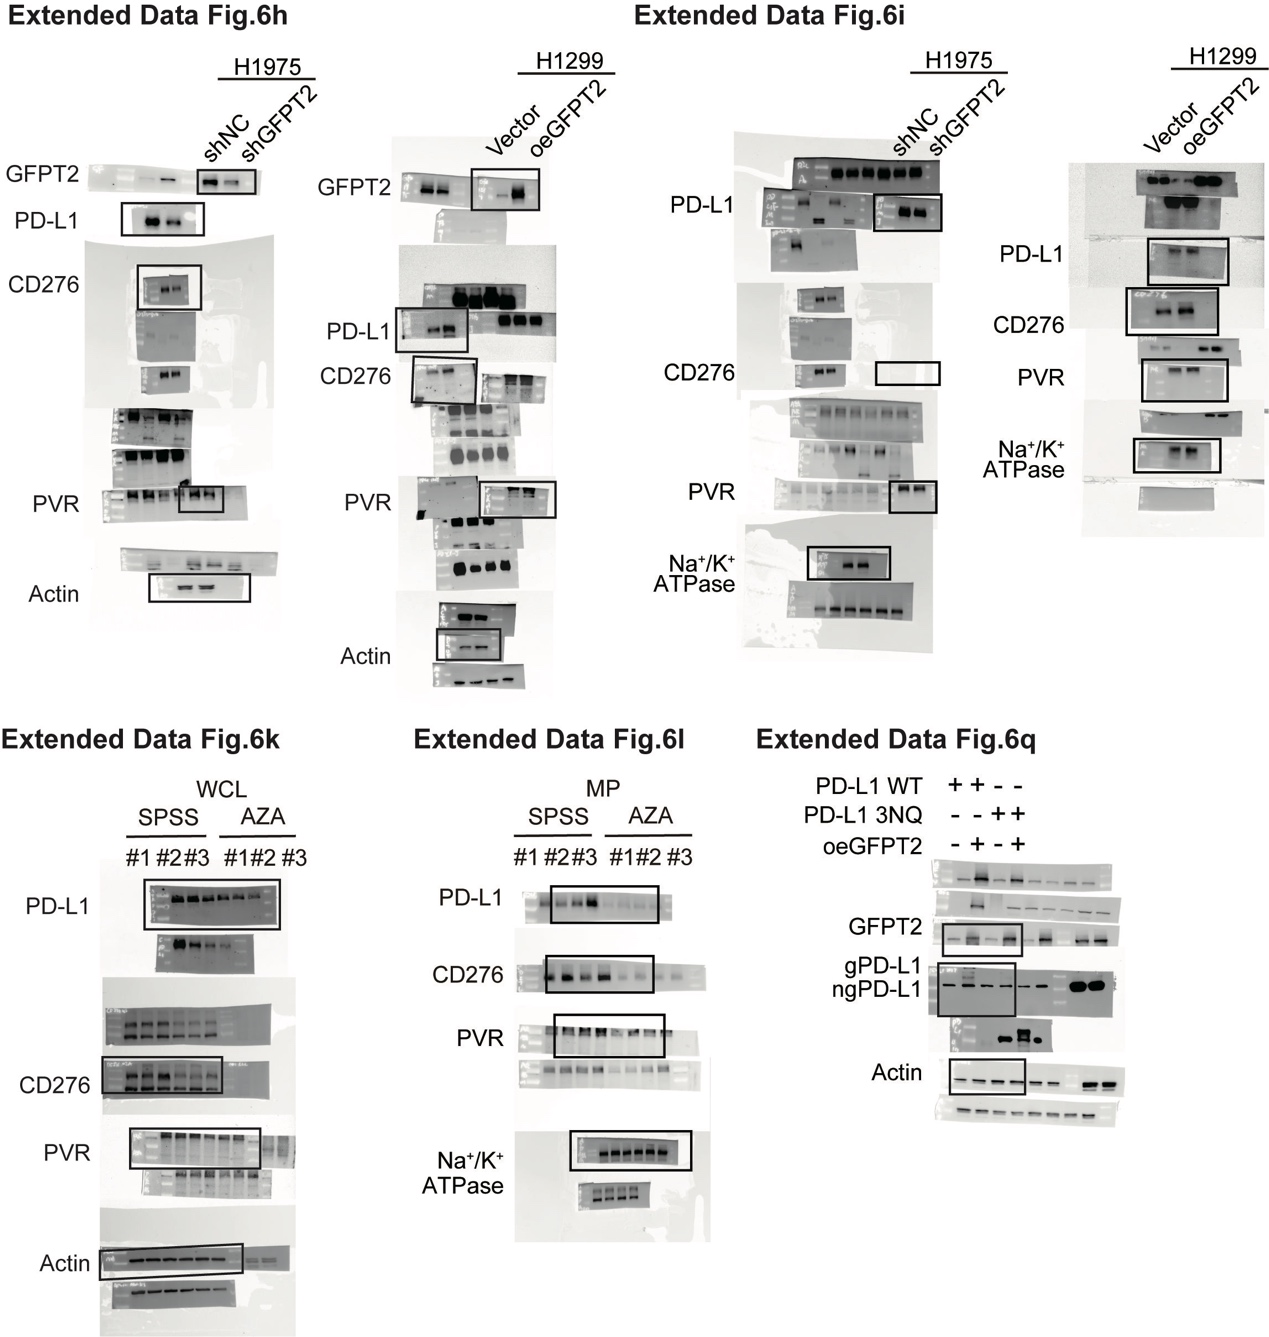
**

**Supplementary Fig 13. Original immunoblotting data related to Extended Data Fig 6.**

**
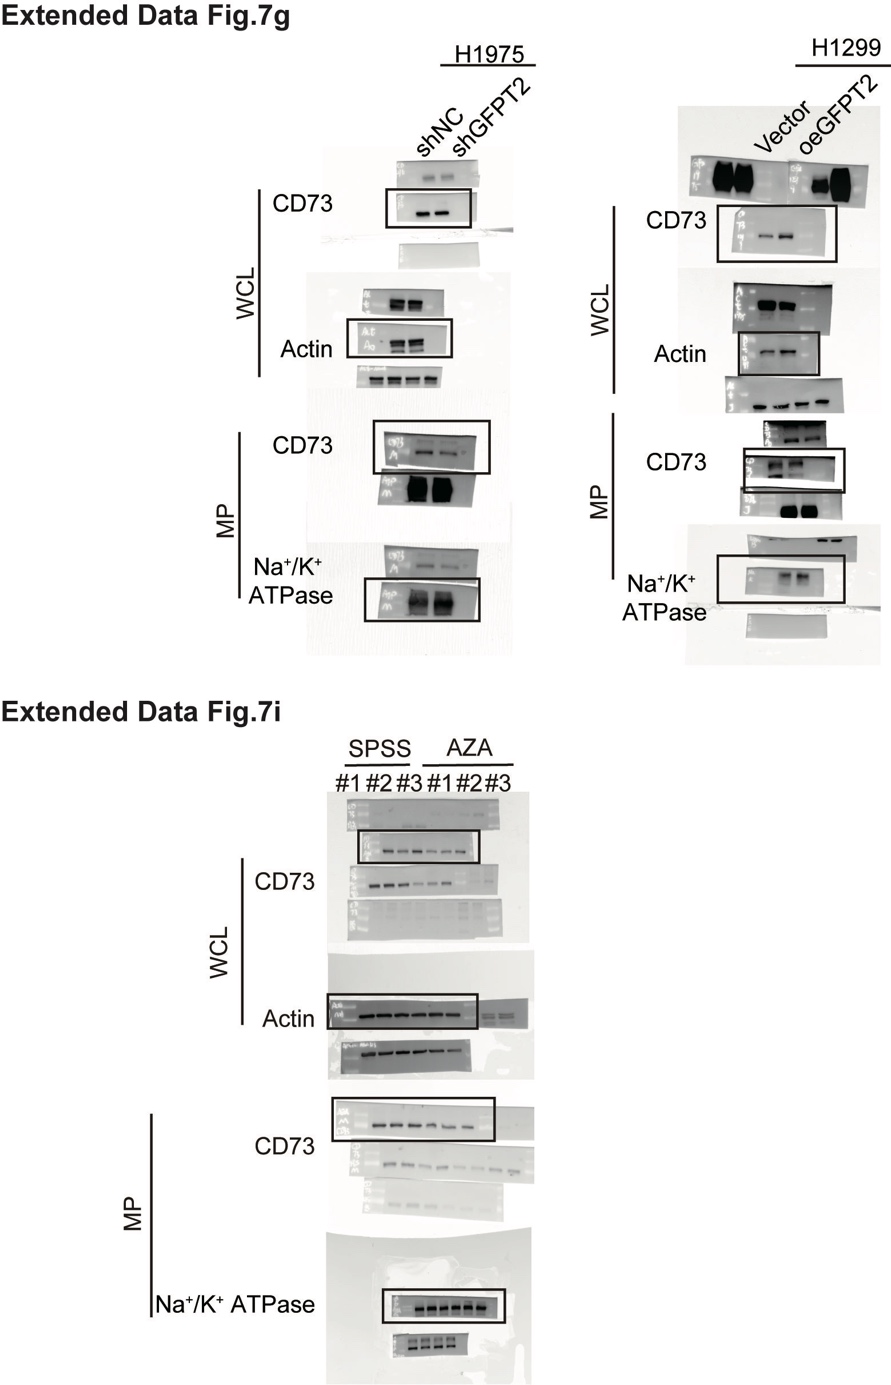
**

**Supplementary Fig 14. Original immunoblotting data related to Extended Data Fig 7.**

**
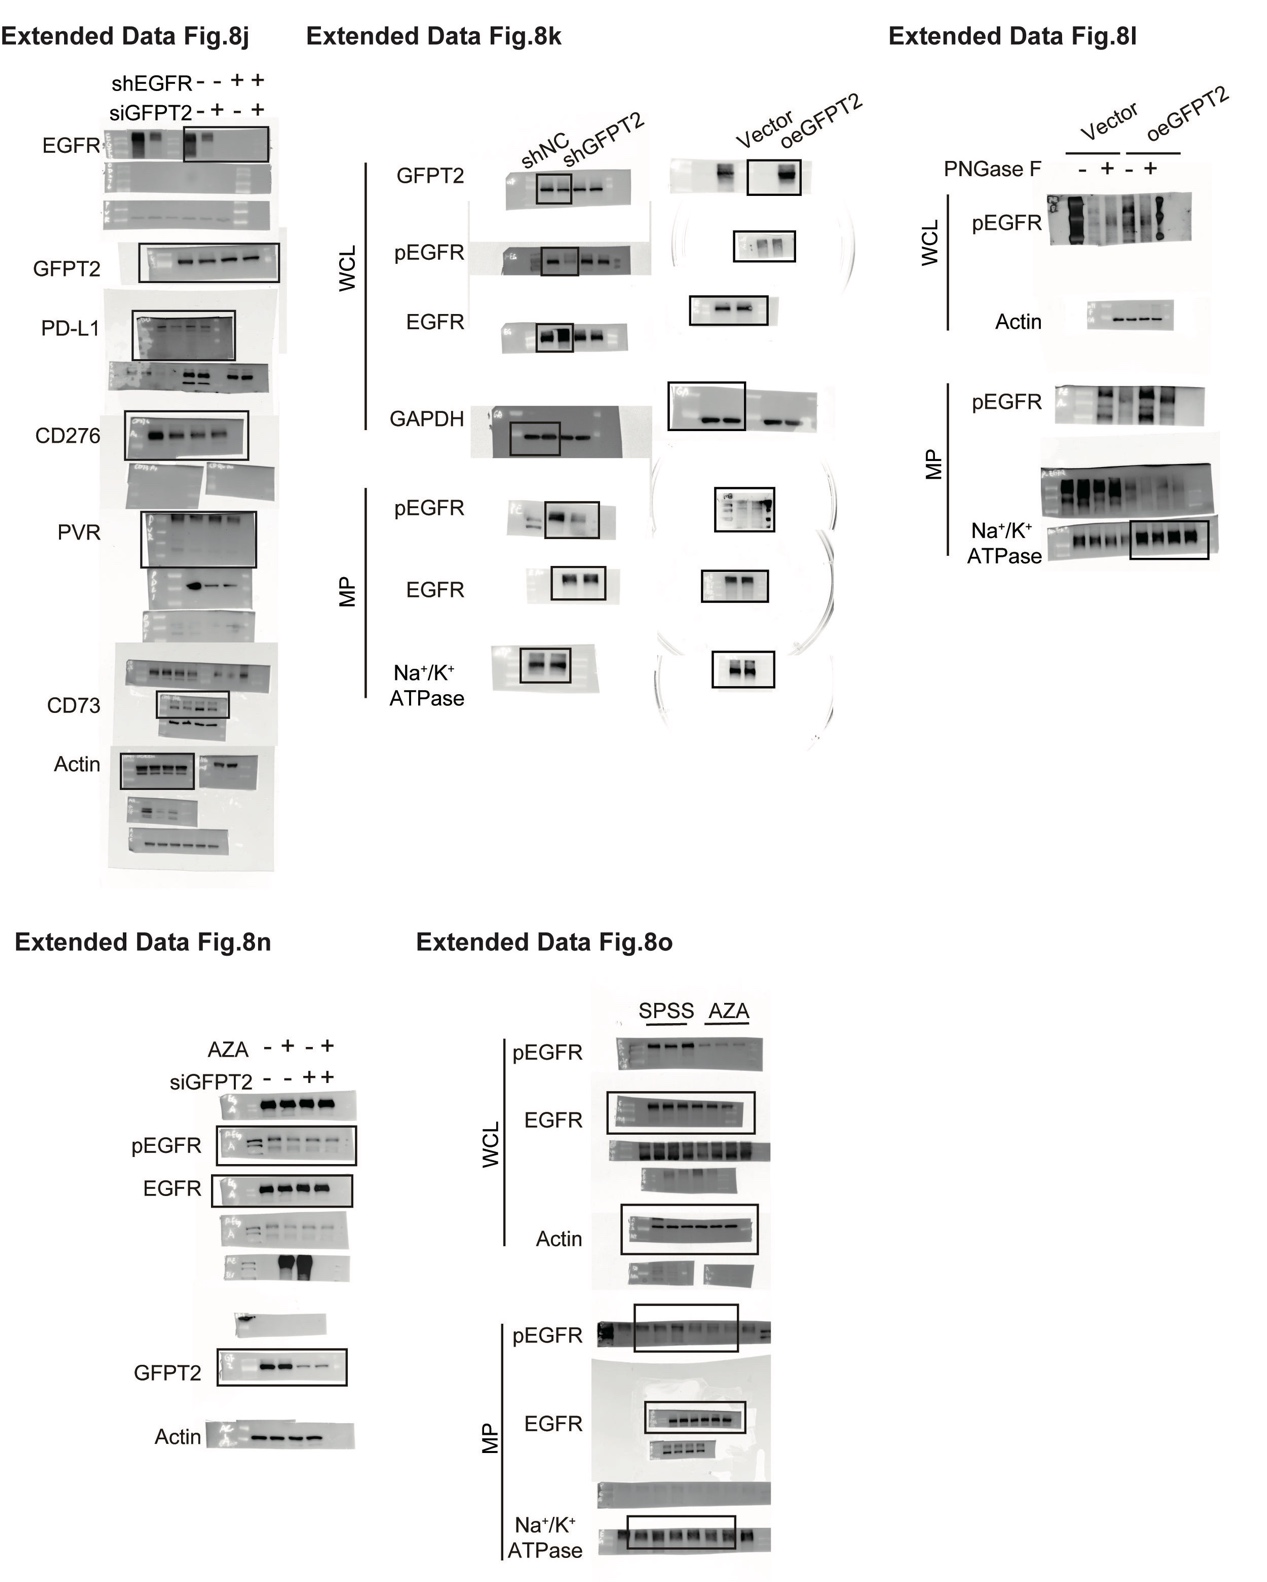
**

**Supplementary Fig 15. Original immunoblotting data related to Extended Data Fig 8.**

**
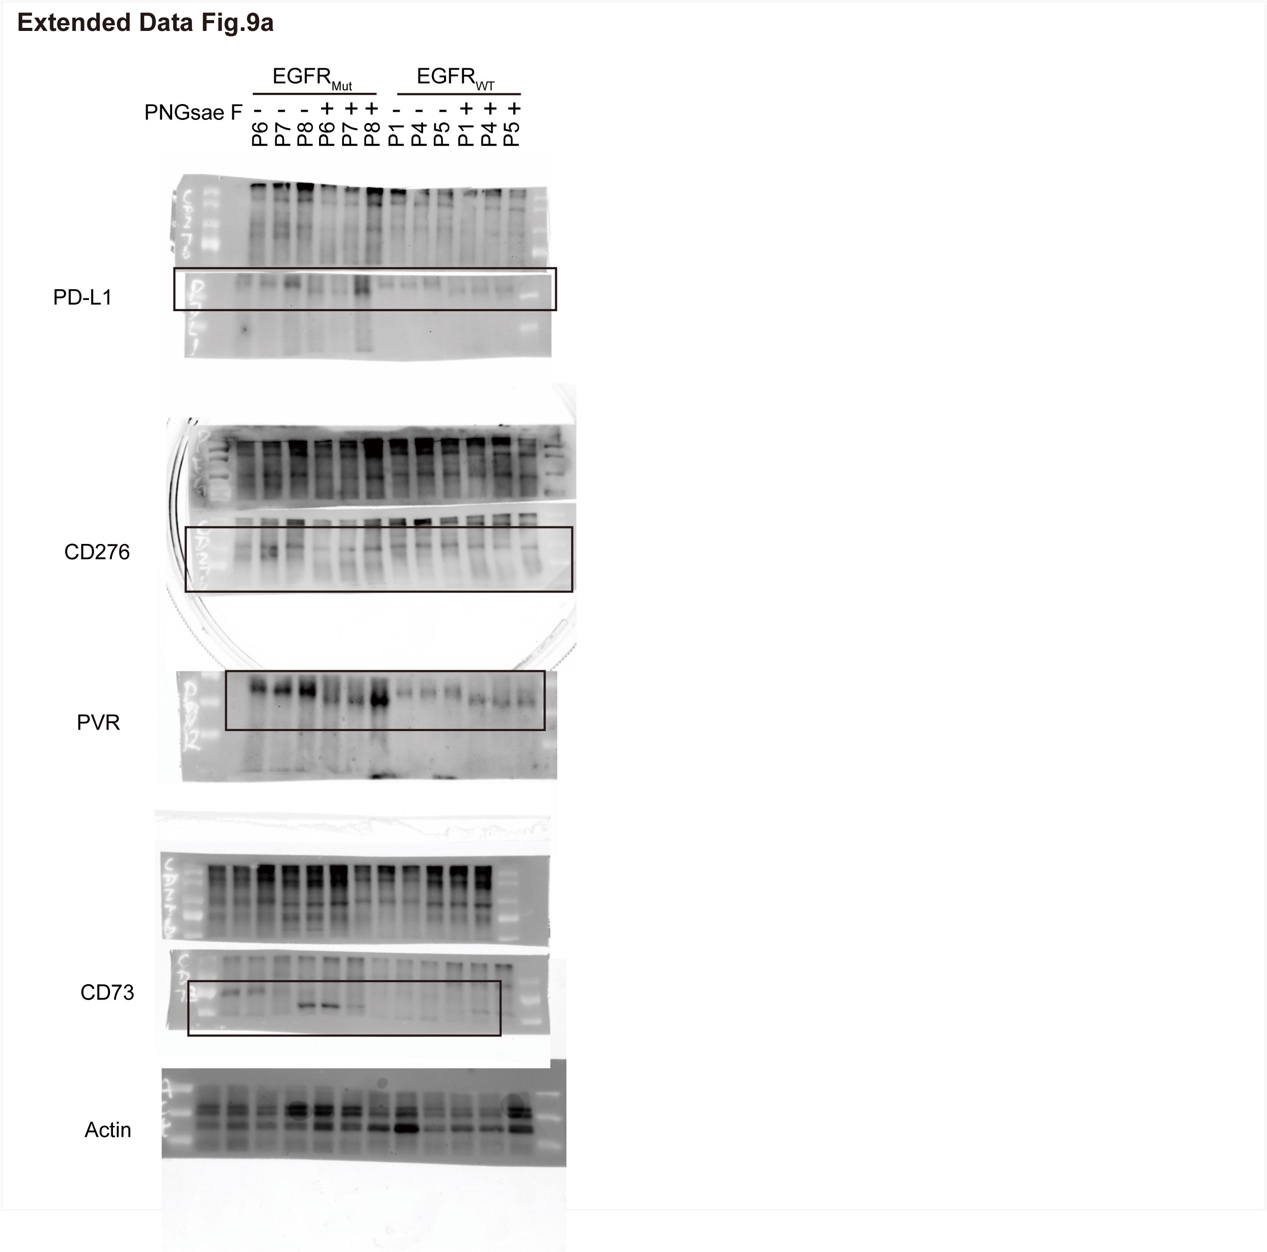
**

**Supplementary Fig 16. Original immunoblotting data related to Extended Data Fig 9.**

**
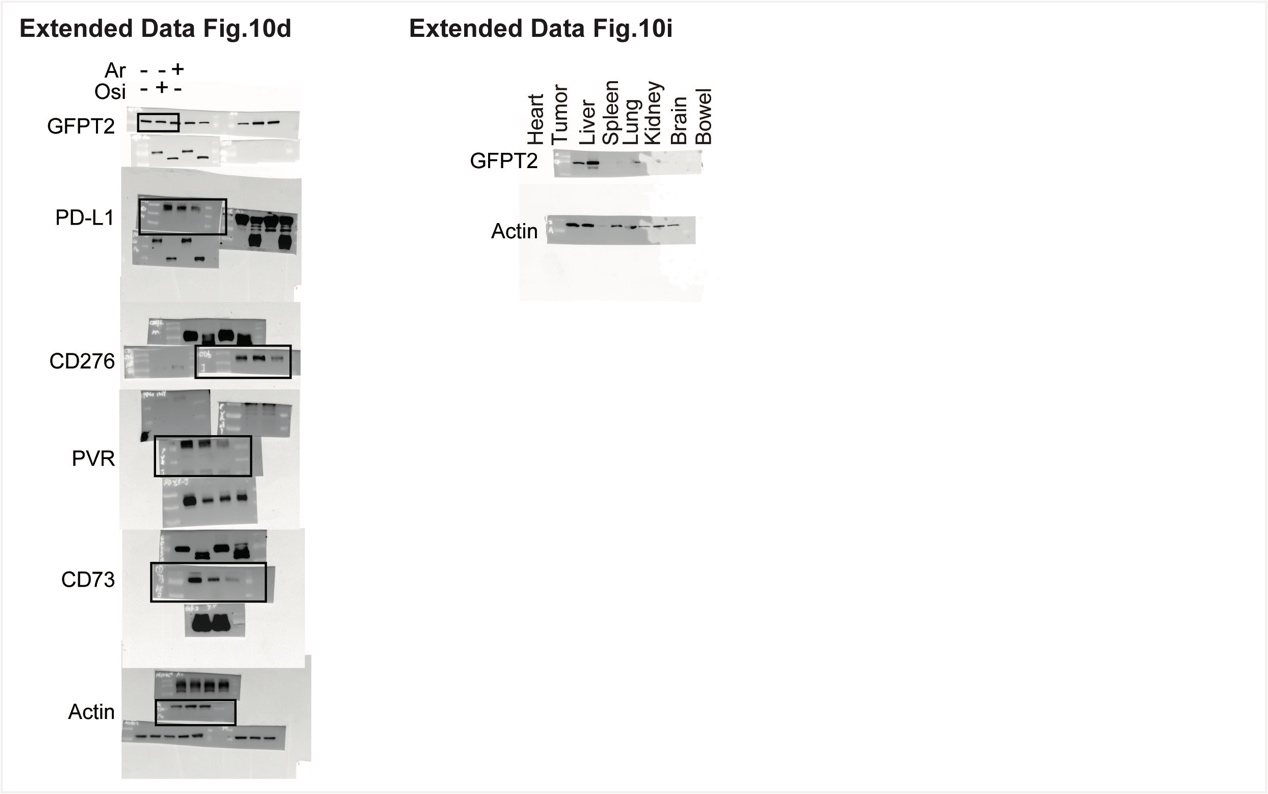
**

**Supplementary Fig 17. Original immunoblotting data related to Extended Data Fig 10.**
