# Supplementary material for: GFPT2 controls immune evasion in EGFR-mutated non-small cell lung cancer
Source: Research Square preprint supplement (doi:10.21203/rs.3.rs-4203208/v1), 2024-04-26
Supplement: Supplementary file 4 [file 446e810803226cae17d47b27.xlsx]

## Sheet: Description
Table S7.The proliferation and activity scoring of tumor infiltrating T cells post GFPT2 knockdown in EGFRmut LLC mouse model. Related to Fig.2 and Extended Data Fig.8.
Sheet	Description
Table S7A	Regulatory genome and regulatory weights for predicting T-cell activity
Table S7B	Expression levels of individual genes (shown in Table S7A) in CD8+T subsets
Table S7C	Activity Scoring of CD8+T
Table S7D	Regulatory genome and regulatory weights for predicting T-cell proliferation
Table S7E	Expression levels of individual genes (shown in Table S7D) in CD8+T subsets
Table S7F	Proliferation Scoring of CD8+T

## Sheet: Table S7A
Gene name	Weight
Aebp2	0.01682
Atf6	0.09195
Bach1	0.03273
Bcl11b	-0.08264
Cebpa	0.0121
Cebpb	-0.02324
Ciita	0.02894
Creb3l1	0.01189
Creg1	0.09253
Dach1	-0.00616
Ebf1	-0.00682
Elk3	0.00403
Eomes	0.03798
Eya1	0.01246
Gata3	-0.03291
Hic1	-0.00049
Hlx	0.068
Hmgn3	-0.00075
Id2	0.10656
Insm1	0.00035
Irf5	0.0685
Kcnip3	0.0272
Klf10	0.00555
Klf12	0.04238
Klf6	0.07367
Maf	-0.00534
Mbd2	0.00332
Mef2a	0.00541
Mef2c	0.01122
Mitf	0.00356
Mllt3	-0.06697
Mycn	-0.00187
Nab1	0.13231
Ncoa7	0.00846
Nfe2l1	-2e-05
Nfkb1	-0.00123
Nr4a2	0.00145
Pax5	-0.00136
Phf21a	0.00655
Pias3	0.02816
Pou2af1	-0.00172
Pparg	-0.00876
Prdm1	0.00341
Rara	0.02512
Rbpj	0.03055
Relb	0.0472
Rfx5	-0.00318
Rora	0.03892
Runx2	0.01559
Rxra	0.05401
Sfpi1	0.0593
Smad3	0.00618
Smyd1	0.03326
Stat4	0.01104
Taf2	-0.00039
Tbx21	0.39714
Tcfe3	0.05883
Trps1	0.09029
Zbtb16	0.01803
Zbtb38	0.00154
Zeb2	0.00182
Zfhx3	-0.00251
Zfp105	0.00384
Zfp318	-0.00227

## Sheet: Table S7B
	Single Cell Name	Group	Aebp2	Atf6	Bach1	Bcl11b	Cebpa	Cebpb	Ciita	Creb3l1	Creg1	Dach1	Ebf1	Elk3	Eomes	Eya1	Gata3	Hic1	Hlx	Hmgn3	Id2	Insm1	Irf5	Kcnip3	Klf10	Klf12	Klf6	Maf	Mbd2	Mef2a	Mef2c	Mitf	Mllt3	Mycn	Nab1	Ncoa7	Nfe2l1	Nfkb1	Nr4a2	Pax5	Phf21a	Pias3	Pou2af1	Pparg	Prdm1	Rara	Rbpj	Relb	Rfx5
6	AAAGAACGTTGTATGC.1_1	shNC	0	0	0	2.42939	0	0	0	0	0	0	0	0	0	0	0	0	0	0	3.46748	0	0	0	0	0	2.42939	0	0	2.42939	0	0	0	0	0	0	0	0	0	0	0	0	0	0	0	0	0	0	0
10	AAAGTCCAGTGCACTT.1_1	shNC	0	0	0	0	1.2023	2.07734	0	0	2.70581	0	0	1.73263	0	0	1.73263	0	0	0	1.2023	0	0	0	0	0	1.73263	0	1.2023	1.2023	1.2023	0	1.2023	0	0	1.2023	0	1.2023	0	0	0	0	0	0	0	1.2023	1.73263	0	0
11	AAATGGACAAGAAATC.1_1	shNC	0.634403	0.366688	0.366688	0	0.366688	0.634403	0	0	0	0	0.845372	1.16775	0	0	0	0.845372	0	1.01949	1.51372	0	0	0	0.366688	0	0.845372	0.366688	1.01949	0.366688	0	0	0.366688	0	0.366688	0.634403	0.366688	0.634403	0.634403	0	1.41114	0	0	0	0	0	0.634403	0.366688	0
12	AACAAGATCACGGGCT.1_1	shNC	0	0	0	2.38706	0	0	0	0	0	0	0	1.78183	0	0	1.78183	0	0	0	1.78183	0	0	0	0	0	1.78183	0	0	0	0	0	0	0	1.78183	0	0	0	0	0	0	0	0	0	0	0	0	0	0
15	AACACACGTTGTTGTG.1_1	shNC	0	0	0	0	0	1.56834	0	0	0	0	0	1.56834	1.06448	0	0	0	0	0	1.90181	0	0	1.06448	1.06448	0	1.56834	0	1.56834	0	0	1.06448	0	0	1.06448	0	0	1.06448	2.15145	0	1.06448	0	0	0	1.56834	0	1.56834	1.06448	0
16	AACACACTCACGAGGA.1_1	shNC	0.729645	0.729645	0	0.729645	0	0.729645	0	0	0	0	0	0	0.729645	0	1.14699	0	0	0.729645	1.44055	0	0	0	0	0	1.85187	0	1.66721	0	0	0	1.66721	0	0	0	0	1.44055	2.00769	0	0	0	0	0	0	0	2.00769	0.729645	0
17	AACAGGGGTGACACAG.1_1	shNC	0	0	0	0	0	0	0	0	0	0	0	0	0	0	0	0	0	0	2.36872	0	0	0	1.4417	0	0	0	0	1.4417	0	0	0	0	1.4417	1.4417	0	0	0	0	0	0	0	0	0	0	0	0	0
18	AACAGGGTCCGACATA.1_1	shNC	0	0	0	0	0	0	0	0	0	0	0	0	0	0	0	0	0	0	2.18453	0	0	0	2.18453	0	2.18453	0	0	0	0	0	0	0	0	0	0	0	0	0	2.18453	0	0	0	0	0	0	0	0
22	AACCTGATCTCATTAC.1_1	shNC	0	0	0	1.17007	0	1.6946	0	0	0	0	0	0	0	0	0	0	0	1.17007	1.17007	0	0	0	1.17007	0	1.17007	0	1.17007	0	0	0	0	0	0	0	0	1.17007	0	0	0	0	0	0	0	0	1.17007	0	0
23	AACCTTTGTGATAGTA.1_1	shNC	0	0	0	1.19102	0	1.19102	0	0	0	0	0	1.71934	1.19102	0	0	0	0	0	2.06322	0	0	0	0	0	1.71934	0	0	1.71934	0	0	0	0	0	0	0	0	1.19102	0	0	0	0	0	1.19102	0	2.52189	0	0
26	AACGTCATCTTTCAGT.1_1	shNC	0	0	0	0	0	0	0	0	0	0	0	0	0	0	0	0	0	0	0	0	0	0	0	0	2.19865	0	0	2.19865	2.19865	0	0	0	0	0	1.61072	1.61072	0	0	0	0	0	0	0	0	1.61072	0	0
27	AACTTCTCAGCCATTA.1_1	shNC	0	0	0	2.38652	0	1.09028	0	0	1.59943	0	0	0	0	0	1.09028	0	0	0	2.1861	0	0	0	0	0	2.1861	0	0	0	0	0	1.09028	0	1.09028	0	0	0	3.20686	0	0	0	0	0	0	0	1.93519	0	0
28	AAGAACAAGAGTTCGG.1_1	shNC	0	0	0	0	0	0	0	0	0	0	1.20278	0	0	0	0	1.7332	0	1.20278	1.20278	0	0	0	0	0	0	0	1.20278	1.20278	0	0	0	0	0	0	0	0	0	0	0	0	0	0	0	0	1.20278	0	0
29	AAGAACAGTACGTACT.1_1	shNC	0	0	1.34319	0	0	2.51163	1.34319	0	0	0	0	0	0	0	0	0	0	0	0	0	0	0	0	0	2.51163	0	0	0	0	0	0	0	0	0	0	0	0	0	0	0	0	0	0	0	1.8965	0	0
30	AAGACTCTCCGTCCTA.1_1	shNC	0	0	0	1.47123	0	0	0	0	1.47123	0	1.47123	1.47123	0	0	1.47123	0	0	0	2.04241	0	0	0	1.47123	0	0	0	1.47123	2.40367	0	0	1.47123	0	0	0	0	2.40367	0	0	0	0	0	0	0	0	0	0	0
32	AAGATAGCATGCGGTC.1_1	shNC	0	0	0	1.50303	0	1.01074	0	0	0	0	0	1.01074	1.01074	0	0	0	0	0	2.91649	0	0	0	1.01074	0	1.83145	0	1.50303	1.01074	0	0	0	0	1.01074	1.01074	1.01074	1.50303	1.83145	0	0	1.01074	0	0	0	0	1.83145	0	0
33	AAGATAGGTACGGCAA.1_1	shNC	0	0	0	0	0	0.850357	0	0	0	0	0	0	0	0	0	0	0	0	0.850357	0	0	0.850357	0	0	1.61372	0	0.850357	0	0	0	1.30317	0	0.850357	0.850357	0	0.850357	0.850357	0	1.61372	0.850357	0	0	0	0	0.850357	0	0.850357
34	AAGCATCGTGATGAAT.1_1	shNC	0	0	0	0	0	2.17479	0	0	0	0	0	0	0	0	0	0	0	0	1.82458	0	0	0	0	0	1.82458	0	1.28096	1.28096	0	0	0	0	1.28096	0	0	0	0	0	0	0	0	0	0	0	1.28096	0	0
35	AAGCCATAGGATTCCT.1_1	shNC	0	0	0.384058	0	0	2.19276	0	0	0.384058	0	0.660862	0	0	0	1.05533	0	0.384058	1.33747	0.660862	0	0	0	0	0	1.4534	0	0	0	0	0	0.384058	0	0.660862	0.384058	0.660862	0.877422	0.660862	0	0.660862	0	0	0	0	0.660862	0.384058	0	0
36	AAGCCATCAGTTCCAA.1_1	shNC	2.55486	1.93654	0	0	0	0	0	0	0	0	0	0	0	0	0	0	0	0	0	0	0	0	0	0	0	0	0	0	0	0	1.93654	0	0	0	0	0	0	0	0	0	0	0	0	0	2.55486	0	0
40	AAGGAATGTCGGATTT.1_1	shNC	1.16671	1.16671	1.16671	0	0	0	0	0	0	0	0	1.16671	0	0	1.16671	0	0	0	0	0	0	0	0	0	2.03264	0	1.69062	1.16671	0	0	0	0	0	0	0	1.16671	0	0	0	0	0	0	0	0	1.69062	1.16671	0
41	AAGGAATGTTACGATC.1_1	shNC	0	0	0	2.06763	0	0	0	0	0	0	0	0	1.00303	0	1.49359	0	0	0	2.43002	0	0	0	1.00303	0	2.26515	0	1.00303	1.82125	0	0	0	0	0	0	0	1.00303	1.82125	0	0	0	0	0	0	0	1.49359	0	0
44	AAGGTAAGTAGTCGGA.1_1	shNC	0	0	0	0	0	0	0	0	0	0	0	0	0	0	0	0	0	0	2.4931	0	0	1.54748	0	0	2.4931	0	0	0	0	0	0	0	0	0	0	2.12813	0	0	1.54748	0	0	0	1.54748	0	0	0	0
46	AAGTACCGTCGAGTTT.1_1	shNC	0	0	0	0	0	0	0	0	0	0	0	0	0	0	0	0	0	0	2.00176	0	0	0	0	0	0	0	0	0	0	0	0	0	0	0	0	0	0	0	0	0	0	0	0	0	0	0	0
49	AAGTTCGTCCGTAGGC.1_1	shNC	0	0	0	0	0	1.27685	0	0	1.27685	0	0	0	0	0	0	0	0	0	1.8198	0	1.27685	0	0	0	0	0.829712	0.829712	2.01	0.829712	0.829712	0	0	0	0.829712	0	0	1.8198	0	0	0	0	0	0.829712	0	1.58473	0	0
50	AATAGAGTCCCGATCT.1_1	shNC	0.578827	1.20951	0	0.578827	0	1.74111	0	0	0.578827	0	0	0	0	0	0	0	0	0	1.59325	0.578827	0	0	0	0	1.86989	0.943084	0.578827	1.20951	1.41968	0.578827	0	0	0.943084	0.578827	0.578827	0.943084	0.943084	0	0.578827	0	0	0	0	0	1.74111	0.943084	0
54	AATGAAGTCCGCCTAT.1_1	shNC	0	0	0	0	0	0	0	0	0	0	0	0	0	0	0	0	0	0	2.1436	0	0	0	0	0	0	0	0	1.25563	0	0	0	0	0	0	1.25563	0	1.7951	0	0	0	0	0	0	0	0	0	0
59	AATTCCTAGTAGCATA.1_1	shNC	0	0	0	0	0	1.43728	0	0	1.43728	0	0	0	0	0	0	0	0	0	2.00397	0	0	0	0	0	0	0	0	0	0	0	0	0	0	0	1.43728	0	2.62734	0	1.43728	0	0	0	0	0	0	0	0
60	AATTCCTCAGAGGCTA.1_1	shNC	0.468784	1.02753	0.468784	0.468784	0	1.94312	0.468784	0	1.22148	0	0	0.468784	0	0	0	0	0	0.468784	1.38385	0	1.02753	0.786683	0	0	1.38385	0.468784	1.02753	0	0.468784	1.38385	0.468784	0	0	0.468784	0.468784	0.468784	1.02753	0	0	0	0	0	0	0	1.22148	0	0
61	AATTTCCTCTACTGCC.1_1	shNC	0	0	0	2.72479	0	0	0	0	0	0	0	0	0	0	0	0	0	0	2.72479	0	1.34824	0	0	0	1.34824	1.34824	1.34824	0	0	0	0	0	0	0	0	1.34824	0	0	1.34824	0	0	0	0	1.34824	0	0	0
64	ACAAGCTCAAGGGCAT.1_1	shNC	0	0.430057	0	0.96013	0	1.76406	0	0	0	0	0.729812	1.14721	0	0	0	0.430057	0	0.729812	0.96013	0	0	0	0.96013	0	0.729812	0	0.729812	0.430057	0.729812	0	0.430057	0	0.729812	0.430057	1.14721	0	0.96013	0	0.729812	0	0	0	0	0.729812	1.14721	0.729812	0
65	ACACAGTCATCGCTAA.1_1	shNC	0.552708	0	0	0.906606	0.552708	2.12579	0	0	0.906606	0	0	0.552708	0	0	0.906606	0	0.552708	0.552708	1.16747	0	0	0	0	0	1.93205	0.906606	0.906606	0.552708	0.906606	1.37417	0.552708	0	0	0	0	0.552708	1.37417	0	0.552708	0	0	0	0	0	1.819	0	0
67	ACACGCGCATGGACAG.1_1	shNC	0.907796	0	0	0	0	0	0	0	0	0	0.907796	0	0	0	0	0	0	0.907796	0	0	0	0	0	0	0.907796	0	0.907796	0	0	0	0	0	0	0	0	0	0	0	0	0	0	0	0	0	1.37566	0.907796	0
69	ACACTGACAGTAACAA.1_1	shNC	0	0	0	3.1293	0	2.47897	0	0	0	0	0	0	0	0	2.47897	0	0	0	0	0	0	0	0	0	0	0	0	0	0	0	3.1293	0	0	0	0	0	0	0	2.47897	0	0	0	0	0	0	0	0
70	ACACTGAGTGCAAGAC.1_1	shNC	0	0	0	0	0	0	0	0	0	0	0	0	0	0	0	0	0	0	3.37175	0	0	0	0	0	0	0	0	0	0	0	0	0	0	0	0	0	2.71235	0	0	0	0	0	0	0	0	0	0
71	ACAGAAAAGAGTCAAT.1_1	shNC	0	0	0	0	0	0	0	0	0	0	0	0	0	0	0	0	0	1.38189	2.76707	0	0	0	0	0	0	0	0	0	0	0	0	0	0	0	0	0	0	0	0	0	0	0	0	0	0	0	0
72	ACAGAAACAACTACGT.1_1	shNC	0	0	0	0	0	1.83779	0	0	0	0	1.83779	0	0	0	0	0	0	0	2.448	0	0	0	0	0	3.76725	0	2.448	1.83779	0	0	0	0	0	0	0	0	0	0	0	0	0	0	0	0	2.448	0	0
73	ACAGAAAGTACCTGTA.1_1	shNC	0	0.814488	0	0	0.814488	1.98652	0.814488	0	1.25734	0	0	0.814488	1.25734	0	0	0	0	0	1.25734	0	0.814488	0	0	0	1.79709	0	0	2.14571	0	1.25734	1.25734	0	0	0	0.814488	0.814488	0	0	1.5632	0	0	0	0	0.814488	0	0	0
76	ACAGGGACACCAAATC.1_1	shNC	0	0	0	2.13764	0	0	0	0	0	0	0	0	0	0	0	0	0	0	0	0	0	0	0	0	0	0	0	0	0	0	0	0	0	0	0	2.13764	0	0	0	0	0	0	0	0	0	0	0
77	ACAGGGATCACCCTTG.1_1	shNC	0.637709	1.02399	0	0.637709	0.637709	1.30194	1.02399	0	1.02399	0.637709	0	0	0	0	0	0	0	0	1.8489	0	0	0	0.637709	0	2.09644	0	0.637709	0.637709	1.30194	0.637709	0	0	0	0	0	1.30194	1.8489	0	1.30194	0	0	0	0.637709	0	1.69758	0	0
78	ACATCGACATGGGTTT.1_1	shNC	0	0.908502	1.37655	0	0	2.12859	0	0	0.908502	0	0	0	0	0	0	0	0	0	0.908502	0	0	0	0	0	2.12859	1.37655	1.37655	0.908502	0.908502	0	0.908502	0	0	0	0	0.908502	0	0	0	0	0	0.908502	0	0	0.908502	0	0
79	ACATTTCGTGCAATAA.1_1	shNC	0	0	0	0	0	0	0	0	0	0	0	0	0	0	0	0	0	0	3.06884	0	0	0	0	0	1.1157	0	0	0	0	0	0	0	1.1157	1.62991	0	0	0	0	0	0	0	0	0	0	0	0	0
82	ACCACAACAGCACAAG.1_1	shNC	1.34277	0	0	2.25013	0	0.881628	0	0	0	0	0	0	0	0	1.34277	0	0	0	2.51111	0	0	0	0	0	1.34277	0	1.89602	0	0	0	1.65718	0	0	0	0.881628	0	0.881628	0	1.34277	0.881628	0	0	0.881628	0.881628	1.65718	0	0
83	ACCACAAGTGCCCACA.1_1	shNC	0	0.746251	0.746251	0	0	1.96008	0.441179	0	2.28977	0	0	0	0.746251	0	0	0	0	0	0.979685	0	0.979685	0	0	0	1.32779	0	0.441179	1.6931	0	0.746251	0	0	0	0	0.441179	0.746251	0	0	0.746251	0.441179	0	0.441179	0	0.441179	0.746251	0.441179	0
85	ACCATTTGTTGTGGCC.1_1	shNC	2.06854	0	0	2.06854	0	0	0	0	0	0	0	1.49439	0	0	0	0	0	0	1.49439	0	0	0	0	0	0	0	1.49439	0	0	0	0	0	1.49439	0	0	0	0	0	0	0	0	0	0	0	1.49439	1.49439	0
86	ACCCTCACATGACGGA.1_1	shNC	1.31621	0	0	0.860621	0	0.860621	0	0	0	0	1.31621	0	0.860621	0	0	0	0	0	0.860621	0	0	0	0	0	0	0	1.62804	0	0	0	0.860621	0	0	0	0.860621	0	0.860621	0	0.860621	0	0	0	0	0	2.58638	0	0
88	ACCCTTGCAATACGAA.1_1	shNC	1.94728	1.94728	0	2.94596	0	0	0	0	0	0	0	0	0	0	0	0	0	0	1.94728	0	0	0	0	0	2.94596	0	0	0	0	0	0	0	0	1.94728	0	1.94728	0	0	0	0	0	0	0	2.56643	2.56643	3.43554	0
89	ACCCTTGCAGCACACC.1_1	shNC	0	0	0	1.8211	0	0	0	0	0	0	0	1.27797	0	0	1.8211	0	0	0	1.8211	0	0	0	0	0	0	0	1.27797	1.27797	0	0	0	0	0	0	0	0	0	0	0	0	0	0	0	0	1.27797	0	0
90	ACCGTTCCAGCCTTCT.1_1	shNC	0	1.85078	0	0	0	0	0	0	0	0	0	0	0	0	0	0	0	0	0	0	0	0	0	0	1.85078	0	1.85078	1.85078	0	0	0	0	0	0	0	0	1.85078	0	0	0	0	0	0	0	1.85078	0	0
95	ACGATCACAGTGTGCC.1_1	shNC	0.599322	0	0	0	0	1.54628	0	0	0	0	0.802596	1.11587	0	0	0	0	0	1.24203	1.11587	0	0.343903	0	0	0	0.343903	0	0.343903	0.343903	0.343903	0.343903	0.343903	0	0.343903	0.343903	0.802596	0.802596	0.599322	0	0.599322	0	0	0	0.343903	0	1.11587	0.599322	0
98	ACGGGTCTCTGCAGCG.1_1	shNC	0	0.431811	0	0.431811	0	0.73241	0	0	0.431811	0	1.15063	0	0	0	0	0.431811	0	0.963225	1.30839	0	0	0	0	0	0.431811	0	0	0.431811	0	0	0	0	0	0	0.963225	0.431811	0	0	0	0	0	0	0.431811	0	1.15063	0.73241	0
100	ACGGTTACACGTAGTT.1_1	shNC	2.23508	0	0	2.60423	0	0	0	0	0	0	0	0	1.64357	0	0	0	0	0	3.08503	0	0	0	0	0	2.23508	0	0	0	0	0	0	0	0	0	0	0	2.23508	0	1.64357	0	0	0	0	0	0	0	0
102	ACGTAACAGGCATGCA.1_1	shNC	0	0	0	1.38368	0	0	0	0	0	0	1.38368	0	0	0	0	0	0	0	1.38368	0	0	0	0	0	1.38368	0	0	0	0	0	1.94292	0	0	0	0	0	3.52297	0	0	0	0	1.38368	0	0	1.38368	0	0
103	ACGTAACGTCTCCCTA.1_1	shNC	0	0	0	2.22324	0	0	0	1.63288	0	0	0	0	0	0	0	0	0	0	0	0	0	0	0	0	0	0	0	0	0	0	0	0	1.63288	0	0	0	1.63288	0	0	0	0	0	0	0	0	0	0
104	ACGTACATCGCTAAAC.1_1	shNC	0	0	0	0	0	1.84122	0.564033	0.564033	2.05665	0	0	0	0	0	0.564033	0	0	0	1.18578	0	1.18578	0	0.564033	0	0.92247	1.39401	0.92247	0	0.564033	0	0.564033	0	0	0.92247	0.564033	0.92247	0	0	0.564033	0	0	0	0	0	0.564033	0	0
106	ACGTTCCCACGGTCTG.1_1	shNC	0	0	0	0	0	1.84001	0	0	1.01723	0	0	0	0	0	1.51096	0	0	0	0	0	0	0	0	0	1.01723	0	1.84001	1.01723	0	0	1.01723	0	0	0	0	0	2.2852	0	0	0	0	0	0	0	1.84001	1.01723	0
107	ACTATCTAGATGTAGT.1_1	shNC	0	0	0	0	0	0	0	0	0	0	0	0	0	0	0	0	0	0	0	0	0	0	0	0	2.3597	0	0	0	0	0	0	0	0	0	0	2.3597	0	0	2.3597	0	0	0	0	0	0	2.3597	0
110	ACTATTCCAACGTATC.1_1	shNC	0	0	0	2.48938	0	0	0	0	0	0	0	0	0	0	0	0	0	0	2.12456	0	0	0	0	0	2.7561	0	1.54428	0	0	0	0	0	0	0	0	1.54428	2.7561	0	0	0	0	0	0	0	0	1.54428	0
116	ACTGATGCATCGTGCG.1_1	shNC	1.70299	0	0	1.70299	0	0	0	0	0	0	0	0	0	0	0	0	0	0	1.70299	0	0	0	0	0	0	1.70299	0	0	0	0	2.30065	0	1.70299	0	0	0	0	0	2.30065	0	0	0	0	1.70299	1.70299	0	0
117	ACTGCAAGTACCAGAG.1_1	shNC	0.510639	0.510639	0	0	0	1.0983	0	0	0.847031	0	0	1.0983	0	0	0.510639	0	0	0	1.60906	0	0	0	0	0	1.60906	0.510639	1.73422	1.29894	0	0	1.0983	0	0	0	0.510639	0	0	0	0.510639	0	0	0	0	0	0.847031	0	0
118	ACTGTCCCACAAGGTG.1_1	shNC	0	1.28719	0	0	0	1.28719	0	0	0	0	0	1.28719	0	0	0	0	0	0	1.28719	0	0	0	0	0	1.28719	0	1.83182	1.83182	0	0	0	0	0	0	0	0	1.28719	0	0	0	0	0	0	0	1.28719	0	0
119	ACTGTGACATTAAAGG.1_1	shNC	0	0	0	1.53194	0	2.11073	0	0	0	0	0	0	0	0	0	0	0	0	0	0	0	0	0	0	1.53194	2.11073	0	0	0	0	1.53194	0	0	0	0	0	0	0	0	0	0	0	0	0	0	0	0
121	ACTTAGGCATTACTCT.1_1	shNC	0	1.18831	0	0	0	0	0	0	0	0	0	0	0	0	0	0	0	0	0	0	0	0	0	0	1.71615	0	1.18831	0	0	0	0	0	1.18831	0	0	0	0	0	0	0	0	0	0	1.18831	0	0	0
122	ACTTCGCCATATGCGT.1_1	shNC	1.40395	0	0	1.96606	0	1.96606	0	0	0	0	0	0	0	0	0	0	0	0	1.96606	0	0	0	0	0	0	0	2.58664	0	0	0	0	0	0	0	0	0	1.40395	0	0	0	0	0	0	0	0	0	0
125	AGAACCTAGGTCGAGT.1_1	shNC	0	0	0	1.03691	0	1.86586	0	0	0	0	0	0	0	0	0	0	0	0	1.86586	0	0	0	0	0	1.53493	0	1.86586	1.03691	0	0	0	0	0	0	0	0	2.47847	0	1.03691	0	0	0	0	0	0	0	0
132	AGACCATGTTCGGTTA.1_1	shNC	1.44368	0	0	2.63512	0	0	0	0	0	0	0	1.44368	0	0	0	0	0	0	2.84382	0	0	0	0	0	2.37106	0	2.01123	0	0	0	1.44368	0	0	0	0	0	2.37106	0	1.44368	0	0	0	0	0	2.37106	0	0
134	AGACTCAAGTGGTGGT.1_1	shNC	0	0	0	3.02195	0	0	0	0	0	0	0	0	0	0	0	0	0	0	3.02195	0	0	0	0	0	2.01629	0	2.64054	0	0	0	0	0	0	0	0	0	0	0	0	0	0	0	0	0	0	0	0
135	AGACTCACAATCAGCT.1_1	shNC	1.41707	0.940983	1.41707	0.940983	0	2.71221	0	0	0	0	0.940983	0	0	0	0	0	0	0	2.3394	0	0	0	0	0	1.41707	0	0	1.73827	0	1.73827	1.41707	0	0	0	0	1.981	0.940983	0	0	0	0	0	0.940983	0	1.41707	0	0
137	AGACTCAGTGCTTCAA.1_1	shNC	0	0	0	0	0	0	0	0	0	0	0	0	1.2836	0	1.2836	0	0	0	0	0	0	0	0	0	0	0	1.2836	0	0	0	0	0	0	0	0	1.2836	0	0	0	0	0	0	0	1.2836	0	0	0
140	AGAGAGCGTCCTACGG.1_1	shNC	0	0	0	0	0	0	0	0	0	0	0	0	0	0	0	0	0	0	2.26856	0	0	0	0	0	0	0	0	0	0	0	0	0	2.26856	0	0	0	0	0	0	0	0	0	0	0	2.26856	0	0
143	AGATCGTAGTTGTAGA.1_1	shNC	1.74344	0	0	1.74344	0	0	0	0	0	0	0	0	0	0	0	0	0	0	2.71806	0	0	0	0	0	1.74344	0	0	0	0	0	0	0	0	1.74344	0	0	0	0	0	0	0	0	0	0	0	0	0
144	AGATGAATCTTTGGAG.1_1	shNC	0	0	0	0	0	0	0	0	0	0	0	1.60275	0	0	1.60275	0	0	0	1.60275	0	0	0	0	0	0	0	1.60275	0	0	0	0	0	0	0	0	0	0	0	0	0	0	0	1.60275	0	0	0	0
147	AGCGATTCAGTGGGTA.1_1	shNC	0	0	0	1.80099	0	1.26068	0	0	0	0	0	0	0	0	0	0	0	0	2.92824	0	0	0	0	0	1.80099	0	0	0	0	0	1.26068	0	0	0	1.26068	0	0	0	1.26068	0	0	0	0	0	0	0	0
151	AGCGATTTCAAGCCTA.1_1	shNC	0	0.814138	0	1.25689	0	1.25689	0	0	1.25689	0	0.814138	0.814138	0	0	0	0.814138	0	0.814138	1.25689	0	0	0	0.814138	0	0.814138	0	0	1.25689	0.814138	0	0	0	0	0	0.814138	0.814138	1.25689	0	0.814138	0	0	0	0	1.25689	0.814138	0.814138	0
152	AGCGCCATCCGTGCGA.1_1	shNC	0	0	0	0	0	0	0	0	0	0	0	1.54052	0	0	0	0	0	0	2.12035	0	0	0	0	0	1.54052	0	1.54052	0	0	0	0	0	0	0	0	0	0	0	0	0	0	0	0	0	0	0	1.54052
153	AGCGCTGTCGGCCTTT.1_1	shNC	0	0	0	0	0	0	0	0	0	0	0	0	0	0	0	0	0	0	1.82197	0	0	0	0	0	2.43081	0	0	0	0	0	2.43081	0	0	0	0	1.82197	0	0	1.82197	0	0	0	0	0	0	0	0
158	AGGACGATCCGAGTGC.1_1	shNC	1.49466	0	0	2.06884	0	0	0	0	0	0	0	0	0	0	0	0	0	0	1.49466	0	0	0	0	0	2.43128	0	2.06884	0	0	0	0	0	0	0	0	1.49466	1.49466	0	0	0	0	0	0	0	0	0	0
159	AGGAGGTCAGCGGTCT.1_1	shNC	1.59833	0	0	0	0	0	0	0	0	0	0	0	0	0	0	0	0	0	0	0	0	0	0	0	0	0	1.59833	0	0	0	0	0	1.59833	0	0	2.55212	0	0	0	0	0	0	0	0	2.18488	0	0
160	AGGAGGTTCACCCTCA.1_1	shNC	0.415074	0.933521	0.415074	0.415074	0	0.707526	0	0	0.415074	0	0.933521	0.707526	0	0	0	0.415074	0	1.52636	0.415074	0	0.415074	0	0.415074	0	0.415074	0	1.27324	0.415074	0.415074	0.415074	0	0	0.415074	0	0.933521	0.415074	0	0	0.933521	0	0	0	0	0	0.707526	1.40779	0
163	AGGCCACGTCACAGTT.1_1	shNC	0	1.48905	0	2.06252	0	0	0	0	0	0	0	0	0	0	0	0	0	0	1.48905	0	0	0	0	0	0	0	0	0	0	0	0	0	0	0	0	0	0	0	1.48905	0	0	0	0	0	0	0	0
166	AGGCTGCGTCAGGTAG.1_1	shNC	1.29311	0	0	0	0	0	0	0	0	0	0	1.29311	0	0	0	0	0	0	2.44897	0	0	0	0	0	1.29311	0	1.29311	1.29311	0	0	0	0	0	0	1.29311	0	0	0	0	0	0	0	0	0	0	1.29311	0
168	AGGGAGTTCCATCGTC.1_1	shNC	0	0	0	1.91255	0	0	0	0	0	0	0	0	0	0	2.9075	0	0	0	0	0	0	0	0	0	0	0	0	0	0	0	2.52898	0	0	0	0	2.52898	2.52898	0	0	0	0	0	0	0	0	0	0
170	AGGGCTCAGAGAGGTA.1_1	shNC	0.726047	0.726047	0	1.43525	0	0.726047	0	0	0.726047	0	0	0	1.66157	0	0	0	0	0	1.14224	0	0	0	0	0	1.43525	0	1.43525	0.726047	0	0.726047	0	0	1.14224	0	0.726047	1.14224	1.43525	0	0	0	0	0	0.726047	0	1.14224	1.43525	0
172	AGGGTGAGTGAGATTA.1_1	shNC	0	0	0	0	0	0	0	0	0	0	0	1.79636	0	0	0	0	0	0	3.2634	0	0	0	0	0	0	0	0	0	0	0	1.79636	0	0	0	0	0	2.40291	0	0	0	0	0	0	0	0	0	0
173	AGGGTGAGTGTCTTCC.1_1	shNC	0.39751	0	0	0.39751	0	0	0	0	0.39751	0	0.39751	0	0.39751	0	0	0	0	1.23564	0.39751	0	0	0	0	0	0.39751	0	0.39751	0	0	0	0.39751	0	0.39751	0.39751	0	0.68119	0	0	0.39751	0	0	0	0	0	0.39751	0	0
176	AGGGTTTAGACTGAGC.1_1	shNC	0	0	0	0	0	0.900189	0	0	0	0	0	0	0	0	0	0	0	0	2.91889	0	0	0	0	0	1.92283	0	0.900189	0	0	0	1.36613	0	0.900189	0	0	0	0	0	0	0	0	0	0	1.68273	0	0.900189	0
177	AGGGTTTCAAGAGATT.1_1	shNC	2.03111	0	0	0	0	1.46123	0	0	0	0	0	0	0	0	0	0	0	0	0	0	0	0	0	0	0	0	0	2.03111	0	0	0	0	1.46123	0	0	1.46123	3.52967	0	0	0	0	0	0	1.46123	1.46123	2.03111	0
178	AGGGTTTTCCTCTCGA.1_1	shNC	0	0	0	1.4417	0	1.4417	0	0	0	0	0	0	0	0	0	0	0	0	2.36872	0	0	0	0	0	3.4029	0	0	1.4417	0	0	1.4417	0	0	0	0	0	2.00899	0	0	0	0	0	0	0	2.36872	0	0
179	AGGGTTTTCTTCCCAG.1_1	shNC	0	0	0	1.32567	0	0	0	0	0	0	0	0	0	0	0	0	0	0	3.01323	0	0	0	0	0	2.4898	0	1.32567	1.32567	0	0	1.32567	0	0	0	0	0	3.01323	0	0	0	0	0	0	0	1.32567	0	0
182	AGGTCTATCCTTTAGT.1_1	shNC	0	0	0	2.66881	0	0	0	0	0	0	0	0	0	0	0	0	0	0	2.66881	0	0	0	0	0	0	0	0	0	0	0	0	0	0	0	0	0	0	0	0	0	0	0	0	0	0	0	0
183	AGGTGTTCAGGTCAAG.1_1	shNC	0	0	0	2.78059	0	0	0	0	0	0	0	1.79888	0	0	0	0	0	0	1.79888	0	0	0	0	0	0	1.79888	0	0	0	0	0	0	0	0	0	0	0	0	1.79888	0	0	0	0	0	0	0	0
187	AGGTTGTAGTTGCGAG.1_1	shNC	0	0	0	1.81462	0	0	0	0	0	0	0	1.27239	0	0	0	0	0	0	1.81462	0	0	0	0	0	2.42281	0	1.27239	0	0	0	0	0	0	0	0	1.27239	1.27239	0	0	0	0	0	0	0	1.27239	0	0
189	AGTAACCTCATGGGAG.1_1	shNC	0	2.47497	0	2.47497	0	0	0	0	0	0	0	1.86264	0	0	0	0	0	0	0	0	0	0	0	0	2.47497	0	2.47497	0	0	0	0	0	0	0	0	0	3.33945	0	2.47497	0	0	0	0	0	1.86264	0	0
190	AGTACCACAAGCGAAC.1_1	shNC	0.352738	0.612976	0.352738	0.819284	0	2.29073	0	0	0.990222	0	1.47789	0.990222	0	0	0	0.352738	0	0.819284	1.26349	0	0	0	0	0	1.7321	0	0.612976	0	0.352738	0	0.612976	0	0.352738	0	0.612976	0	1.26349	0	0.352738	0.352738	0	0	0	0	0.352738	0.819284	0
194	AGTCACAAGTCTACCA.1_1	shNC	0	0	0	0	0	0	0	0	1.39202	0	0	0	0	0	0	0	0	0	1.95245	0	0	0	0	0	0	0	0	1.39202	0	0	0	0	2.30945	0	0	1.95245	0	0	1.39202	0	0	0	0	0	1.39202	0	0
195	AGTCACATCGCCGAGT.1_1	shNC	1.76759	0	0	0	0	1.76759	0	0	0	0	0	0	0	0	1.76759	0	0	0	0	0	0	0	0	0	2.3715	0	1.76759	0	0	0	0	0	0	0	0	0	0	0	1.76759	0	0	0	1.76759	0	0	0	0
196	AGTCACATCTAGGCCG.1_1	shNC	0.852204	0	0	0	0	0.514262	0	0	0.514262	0	0.514262	1.30552	0	0	0	0	0	0	0	0	0	0	0	0	1.10433	0	1.10433	0.852204	0	0	0.514262	0	0.852204	0.852204	0.852204	0	0.852204	0	0.852204	0	0	0	0	0.852204	1.10433	0	0
201	AGTGTTGCAATACGAA.1_1	shNC	0	0	0	0	0	1.43826	0	0	0	0	0	1.43826	1.43826	0	0	0	0	0	2.62854	0	0	0	0	0	2.62854	0	2.00509	0	0	0	0	0	0	0	0	0	2.36463	0	0	0	0	0	0	0	0	1.43826	0
203	AGTTAGCGTAGTCGTT.1_1	shNC	0	0	0	0.445494	0	0.752606	0	0	1.33666	0	1.33666	0.987228	0	0	0.445494	0.752606	0	1.33666	0.445494	0	0	0	0	0	0.445494	0	0.445494	0.445494	0	0	0	0	0	0.445494	0.445494	0.445494	0	0	0.445494	0.445494	0	0	0	0	0.752606	0	0
204	ATACCGAAGTGCAACG.1_1	shNC	1.22968	0	0	0	0	0	0	0	0	0	0	1.22968	0	0	0	0	0	0	2.36842	0	0	0	0	0	1.22968	0	1.22968	0	0	0	1.22968	0	0	0	1.22968	0	0	0	1.76478	0	0	0	0	0	1.22968	0	0
205	ATACCGAGTTCTAAGC.1_1	shNC	0	0	0	0	0	0.925815	0	0	1.39819	0	0	0.925815	0	0	0	0	0	0	2.15404	0	1.39819	0	0	0	0	0.925815	0.925815	1.71771	0.925815	0	0	0	0	0	0	0.925815	0	0	0	0	0	0	0	0	0.925815	0	0
208	ATAGACCCACCCTCTA.1_1	shNC	0	0	0	0	0	2.19794	0	0	0	0	0	0	2.19794	0	0	2.19794	0	0	0	0	0	0	0	0	2.19794	0	0	0	2.19794	0	0	0	0	0	0	0	3.71435	0	2.19794	0	0	0	0	2.19794	0	0	0
209	ATAGAGAAGAGCAAGA.1_1	shNC	1.42158	1.98614	0	0	0	0	0	0	0	0	0	0	1.42158	0	0	0	0	1.42158	1.42158	0	1.42158	0	0	0	0	0	1.42158	0	0	0	1.42158	0	0	0	0	0	1.98614	0	0	0	0	0	0	0	1.98614	0	0
211	ATAGAGACACCTGCGA.1_1	shNC	0	0	0	0	0	0	0	0	0	0	0	0	0	0	0	0	0	0	2.44592	0	0	0	0	0	1.50712	0	0	0	0	0	0	0	0	0	0	2.08286	2.44592	0	0	0	0	0	0	1.50712	0	0	0
212	ATAGAGAGTCTCAGGC.1_1	shNC	0	0	0	0	0	0	0	0	0	0	0	0	0	0	0	0	0	0	1.77447	0	0	0	0	0	1.77447	0	0	0	0	0	1.77447	0	0	0	0	0	0	0	0	0	0	0	0	0	0	0	0
213	ATAGAGATCTGGTGCG.1_1	shNC	0	0	0	0	0	0	0	0	0	0	0	0	0	0	0	0	0	0	1.72387	0	0	0	0	0	1.19486	0	0	0	0	0	0	0	0	1.19486	0	1.19486	1.19486	0	0	0	0	0	0	0	1.72387	1.19486	0
214	ATAGGCTCAGACTCTA.1_1	shNC	1.82677	0	0	0	0	1.82677	0	0	0	0	0	0	0	0	1.82677	0	0	0	1.82677	0	0	0	0	0	3.86961	0	0	0	0	0	0	0	0	0	0	0	2.81189	0	1.82677	0	0	0	0	0	0	0	0
221	ATCACTTGTGATCATC.1_1	shNC	0	0	0	0	0	2.6233	0	0	0	0	1.2687	0	0	0	0	0	1.2687	0	1.2687	0	0	0	0	0	1.2687	0	0	1.2687	1.2687	1.2687	0	0	1.2687	0	0	0	0	0	0	0	0	0	0	0	1.2687	1.81033	0
223	ATCCACCCAGCGATTT.1_1	shNC	0	0	0	0	0	0	0	0	0	0	0	0	0	0	0	0	0	0	1.61297	0	0	0	0	0	1.61297	0	2.56902	0	0	0	0	0	0	0	0	2.20115	1.61297	0	0	0	0	0	0	0	1.61297	0	0
224	ATCCATTGTTGCTAGT.1_1	shNC	0	0	0	2.79924	0	0	0	0	0	0	0	0	0	0	0	0	0	0	0	0	0	0	0	0	0	0	1.81548	2.42375	0	0	0	0	0	0	0	0	0	0	0	0	0	0	1.81548	0	2.42375	0	0
225	ATCCCTGAGGCTATCT.1_1	shNC	0	1.6774	0	0	0	2.47477	0	0	1.15556	0	0	1.15556	0	0	0	0	0	0	3.21623	0	0	1.15556	0	0	2.01855	1.15556	0	2.01855	0	0	0	0	0	0	1.15556	0	0	0	0	0	0	0	0	1.15556	1.6774	0	0
226	ATCCCTGAGGGAGGTG.1_1	shNC	0	0	0	1.17531	0	1.70079	0	0	0	0	0	0	0	0	0	0	0	0	2.29823	0	1.17531	0	0	0	1.17531	0	0	0	0	0	0	0	1.17531	0	0	0	2.29823	0	0	0	0	0	0	0	1.17531	0	0
228	ATCCCTGCAAGTGGCA.1_1	shNC	0	0	0	0	0	0	0	0	0	0	0	0	0	0	0	0	0	0	0	0	0	0	0	0	1.59238	0	2.17825	2.17825	0	0	0	0	0	0	1.59238	0	1.59238	0	0	0	0	0	0	0	2.17825	0	0
230	ATCCGTCGTAGCCAGA.1_1	shNC	0	0	0	0	0	0	0	1.94883	0	0	0	0	0	0	0	0	0	0	0	0	0	0	0	0	1.94883	0	1.94883	1.94883	0	0	2.94767	0	0	0	1.94883	1.94883	2.56809	0	1.94883	0	0	0	0	0	0	0	0
231	ATCCGTCTCTGGGATT.1_1	shNC	0.639607	0.639607	0.639607	0.639607	0	0	0	0	1.02657	0	0	0.639607	0	0	0	0	1.02657	0	1.30487	0	0.639607	0	0.639607	0	2.09997	1.52234	1.02657	0.639607	0.639607	1.52234	0.639607	0	1.02657	0	0	1.30487	1.85229	0	1.02657	0	0	0	0	0	1.30487	0	0
232	ATCGCCTAGCTGACTT.1_1	shNC	0	0	0	0	0	0	0	0	0	0	0	0	0	0	0	0	0	0	2.97136	0	0	0	1.29349	0	0	0	0	0	0	0	0	0	0	0	0	0	2.97136	0	1.29349	0	0	0	0	0	2.44945	0	0
233	ATCGCCTAGTAAGCAT.1_1	shNC	0	0	0	0	0	0.836846	0	0	0	0	0	0	0	0	0	0	0	0	1.28596	0	0	0	0	0	1.28596	0	0	0.836846	0	0	1.83039	0	0	0	0	0.836846	0.836846	0	0	0	0	0	0	0.836846	0	0	0
234	ATCGGATCACTCTAGA.1_1	shNC	2.87958	0	0	0	0	0	0	0	0	0	0	0	2.87958	0	0	0	0	0	0	0	0	0	0	0	0	0	0	0	0	0	3.54424	0	0	0	0	0	2.87958	0	0	0	0	0	0	0	0	0	0
240	ATGAAAGAGTCGAAGC.1_1	shNC	0	0	0	0	0	0	0	0	0	0	0	0	0	0	0	0	0	0	0	0	0	0	0	0	0	0	2.90614	0	0	0	0	0	0	0	0	0	2.26624	0	0	0	0	0	0	0	2.26624	0	0
241	ATGAAAGCACACCTTC.1_1	shNC	0	0	0	2.35883	0	0	0	0	0	0	0	0	0	0	0	0	0	0	0	0	0	0	0	0	0	0	2.35883	2.35883	0	0	0	0	0	0	0	0	0	0	0	0	0	0	0	0	0	0	0
244	ATGACCACATATACCG.1_1	shNC	0.700681	0	0.700681	0.700681	0.700681	2.21058	0	0	1.10865	0	0	0.700681	0	0	0	0	0	0	0.700681	0	0	0	0	0	1.10865	1.10865	1.39757	1.10865	1.39757	0	0	0	0	0	1.10865	1.10865	0	0	0.700681	0	0	0	0.700681	0	1.39757	0	0
250	ATGATCGAGGCTCAAG.1_1	shNC	0	0	0	0	0	0	0	0	0	0	0	0	0	0	0	0	0	0	0	0	0	0	0	0	2.18733	0	1.60054	0	0	0	0	0	0	0	0	0	0	0	0	0	0	0	0	0	2.18733	0	0
252	ATGATCGGTGCAACAG.1_1	shNC	0	0	0	2.44271	0	0	0	0	0	0	0	0	0	0	2.44271	0	0	0	0	0	0	0	0	0	0	0	0	0	0	0	0	0	0	0	0	0	2.44271	0	0	0	0	0	0	0	0	0	0
257	ATGGGAGCAGAAATCA.1_1	shNC	0	1.60816	0	0	0	0	0	0	0	0	0	0	0	0	0	0	0	0	0	0	0	0	0	0	3.21734	0	0	0	0	0	2.1958	0	0	1.60816	0	1.60816	0	0	2.1958	0	0	0	0	0	0	0	0
260	ATGGTTGAGTTCCGGC.1_1	shNC	0	1.35888	0	0.894422	0	0.894422	0	0	0	0	0	0.894422	0	0	0	0	0	0	1.67481	0	0	0	0.894422	0	2.40888	0	1.67481	0	0	0	0	0	0	0	0	1.35888	1.91452	0	0	0	0	0	0	0	0.894422	0.894422	0
262	ATGTCCCAGGCGACAT.1_1	shNC	0	0	0	1.70336	0	0	0	0	0	0	0	0	1.70336	0	0	1.70336	0	0	1.70336	0	0	0	1.70336	0	0	0	1.70336	0	0	0	0	0	0	2.30106	0	0	1.70336	0	0	0	0	0	0	0	0	0	0
263	ATGTCCCCAAGGTCGA.1_1	shNC	0	0	0	0	0	1.79051	0	0	1.79051	0	0	0	0	0	0	0	0	0	1.79051	0	0	0	0	0	1.79051	0	0	1.79051	0	0	0	0	0	0	0	0	0	0	0	0	0	0	0	0	0	0	0
264	ATGTCCCGTAATTAGG.1_1	shNC	1.68828	0	0	1.16473	0	1.16473	0	0	0	0	0	0	0	0	0	0	0	1.16473	2.48702	0	0	0	0	0	0	0	1.16473	1.16473	0	0	0	0	0	0	0	0	2.03015	0	0	0	0	0	0	1.16473	1.16473	0	1.16473
267	ATTACTCCATATCTCT.1_1	shNC	0	0	0	1.25653	0	0	0	0	0	0	0	1.79615	0	0	0	0	0	0	2.77752	0	0	0	0	0	0	0	1.79615	0	0	0	1.25653	0	1.25653	0	0	0	0	0	0	0	0	0	0	0	0	0	0
269	ATTACTCTCAGCCCAG.1_1	shNC	1.4086	0	0	0	0	0	0	0	0	0	0	0	0	0	0	0	0	0	1.97136	0	0	1.4086	0	0	1.97136	0	2.3293	0	0	1.4086	1.4086	0	0	0	0	1.97136	1.97136	0	0	0	0	0	0	0	1.97136	1.4086	0
271	ATTACTCTCGGAGTGA.1_1	shNC	0	0	0	1.61168	0	1.61168	0	0	0	0	0	1.61168	0	0	0	0	0	0	0	0	0	0	0	0	2.83585	0	0	0	0	0	1.61168	0	0	0	0	0	0	0	2.19972	0	0	0	0	0	1.61168	0	0
273	ATTATCCGTGCGGCTT.1_1	shNC	0	0	0	0	0	1.04749	0	0	0	0	0	0	0	0	0	0	0	0	2.49344	0	0	0	0	0	0	0	1.54777	1.04749	0	0	0	0	1.04749	0	0	0	0	0	0	0	0	0	0	0	1.04749	1.04749	0
274	ATTCACTTCGGTCAGC.1_1	shNC	0	1.62859	0	0	0	1.62859	0	0	0	0	0	0	0	0	1.62859	0	0	0	0	0	0	0	1.62859	0	0	0	2.21848	1.62859	0	0	0	0	0	0	0	0	2.58702	0	0	0	0	0	0	0	0	1.62859	0
275	ATTCAGGCAAATCAGA.1_1	shNC	0	0	0	1.92445	0	0	0	0	0	0	0	0	1.36754	0	0	0	0	0	0	0	0	0	0	0	2.54182	0	1.36754	0	0	0	2.54182	0	0	1.36754	0	1.36754	1.36754	0	1.36754	0	0	0	0	0	0	0	0
277	ATTCAGGTCCTATGGA.1_1	shNC	0.34574	0.806077	0.602167	0.34574	0	1.12011	0	0	0	0	0.34574	0.34574	0	0	0	0.34574	0	0	0.34574	0	0	0.34574	0.806077	0	1.35873	0	0.34574	1.35873	0	0	0	0	0	0	0	0.34574	1.35873	0	0.602167	0	0	0	0	0.34574	1.55124	0.602167	0
279	ATTCATCCAACCGCCA.1_1	shNC	1.44269	0	0	1.44269	0	0	0	0	0	0	0	0	0	0	0	0	0	0	2.01011	0	0	0	0	0	0	0	1.44269	0	0	0	2.01011	0	1.44269	2.01011	0	0	2.01011	0	0	0	0	0	0	1.44269	1.44269	0	0
280	ATTCATCGTAGGCTCC.1_1	shNC	0	0	0	0	0	1.48825	0	0	0	0	0	0	1.48825	0	1.48825	0	0	0	2.06162	0	0	1.48825	0	0	0	0	1.48825	0	0	0	0	0	0	0	0	0	2.68903	0	0	0	0	0	0	0	0	0	0
281	ATTCCCGCAACCGTAT.1_1	shNC	1.63721	1.12181	0	1.12181	0	0	0	0	1.63721	0	0	0	0	0	0	0	0	0	1.63721	0	0	0	0	0	1.63721	0	1.12181	0	0	0	1.12181	0	0	0	0	1.12181	1.12181	0	1.12181	0	0	0	1.12181	0	0	0	0
285	ATTCTACAGGGCCCTT.1_1	shNC	0	0	0	0	0	0	0	0	0	0	0	0	0	0	0	0	0	0	0	0	0	0	0	0	2.53341	0	1.58217	0	0	0	0	0	0	0	0	0	2.53341	0	2.16688	0	0	0	0	0	2.16688	0	0
286	ATTCTACGTCCCTAAA.1_1	shNC	0.801329	0	0	0	0	2.90137	0.801329	0	0.801329	0	0	0	0	0	0	0	0	0	2.26171	0	0	0	0	0	0	0.801329	0.801329	0	0.801329	0.801329	0	0	0	0	0	0.801329	0	0	0.801329	0	0	0	0	0	0	0	0
287	ATTCTTGAGTTCACTG.1_1	shNC	0	0	0	0	1.23294	0	0	0	0	0	0	1.23294	0	0	0	0	0	0	1.7686	0	1.23294	1.23294	0	0	0	0	1.23294	0	0	1.23294	1.7686	0	0	0	0	1.23294	1.7686	0	0	0	0	0	0	1.23294	0	1.23294	0
288	ATTCTTGCACTTGTCC.1_1	shNC	1.32264	0	0	1.32264	0	2.22569	0	0	0	0	0	0	0	0	0	0	0	0	2.69236	0	0	0	0	0	1.87282	0	0	0	0	0	1.87282	0	0	0	0	0	1.32264	0	1.32264	0	0	0	0	0	1.87282	0	0
289	ATTCTTGCAGGGAGAG.1_1	shNC	0	0	0	0	0	1.65034	0	0	0.816526	0	0.351273	0.610717	0	0	0	0	0.351273	0	0	0	0	0	0.351273	0	0	0	0.610717	0.351273	0	0	0.351273	0	0.351273	0	0.816526	0.351273	0.610717	0	0	0	0	0	0	0.351273	0.610717	0.610717	0
296	ATTTCTGCATGACCCG.1_1	shNC	0	1.91699	0	0	0	0	0	0	0	0	0	0	0	0	0	0	0	0	0	0	0	0	0	0	0	0	0	2.53377	0	0	1.91699	0	0	0	0	0	2.53377	0	1.91699	0	0	0	0	0	0	0	0
300	CAACAACTCAATGCAC.1_1	shNC	2.02566	0	0	0	0	0	0	0	0	0	0	0	1.45642	0	0	0	0	0	0	0	0	0	0	0	1.45642	0	1.45642	0	0	0	0	0	0	0	0	1.45642	1.45642	0	0	0	0	0	0	0	1.45642	0	0
302	CAACAACTCGAGAGCA.1_1	shNC	0	0	0	0	0	2.69339	0	0	0	0	0	0	0	0	0	0	0	0	1.32344	0	0	0	0	0	1.87375	0	0	0	0	0	0	0	0	0	0	0	2.48702	0	0	0	0	0	0	0	1.32344	0	0
303	CAACAGTGTCACAGTT.1_1	shNC	0.482308	1.05062	0.806305	0	0.482308	2.13271	0.806305	0	1.05062	1.05062	0	0.482308	0	0	0	0	0	0	1.67498	0	1.05062	0	0	0.482308	2.59497	1.55157	0	1.05062	0.806305	0.806305	0.806305	0	0	1.05062	0	1.41075	1.55157	0	0.482308	0	0	0	0.482308	0	1.41075	0.482308	0
307	CAAGACTTCGAGCCAC.1_1	shNC	1.47772	0	0	2.04974	0	0	0	0	0	0	0	0	0	0	0	0	0	0	2.41134	0	0	0	0	0	1.47772	0	1.47772	0	1.47772	0	2.41134	0	0	0	0	2.41134	0	0	0	0	0	0	0	0	0	0	0
308	CAAGACTTCTGGCTGG.1_1	shNC	1.93249	0	0	0	0	0	0	0	0	0	0	1.93249	1.37456	0	0	0	0	0	1.93249	0	0	0	0	0	0	0	1.93249	0	0	0	1.37456	0	0	0	0	1.37456	1.37456	0	1.93249	0	0	0	0	1.93249	0	1.37456	0
309	CAAGACTTCTTTCTAG.1_1	shNC	0	0	0	1.32446	0	0	0	0	0	0	0	0	0.867131	0	0	0	0	0	1.63709	0	0	0	0	0	1.63709	0	1.32446	0	0	0	0	0	0	0	0	0	2.22791	0	1.32446	0	0	0	1.32446	0	0	0.867131	0
311	CAAGCTACAAACTAGA.1_1	shNC	0.718099	0.422168	0	0	0	0.422168	0	0	0.718099	0	1.64907	0.718099	0	0	0	0	0.422168	0.422168	0.718099	0	0.422168	0	0.422168	0	0.718099	0	0.718099	0	0	0	0.946159	0	0.422168	0.422168	0.718099	0.718099	0.946159	0	0.718099	0	0	0	0	0	0.718099	0.946159	0
312	CAAGGGACATGCCATA.1_1	shNC	0	0	0	0	0	0	0	0	0	0	0	0	0	0	0	0	0	0	2.43065	0	0	0	0	0	0	0	0	0	0	0	0	0	0	0	0	0	0	0	0	0	0	0	0	0	0	0	0
314	CAATACGCATAACAGA.1_1	shNC	0	0	0	1.94471	0	0	0	0	0	0	0	0	0	0	0	0	0	0	1.94471	0	0	0	0	0	0	0	2.56366	0	0	0	0	0	0	0	1.94471	0	0	0	0	0	0	0	0	0	0	0	0
316	CAATACGTCGAGTCCG.1_1	shNC	0	0	0	0	0	2.1383	0	0	0	0	0	0	0	0	0	0	0	2.1383	0	0	0	0	0	0	0	0	0	0	0	0	0	0	0	0	0	0	0	0	2.1383	0	0	0	0	0	0	0	0
318	CAATTTCTCCACTTCG.1_1	shNC	0.739006	0	0	2.02328	0	0	0	0	0.739006	0	0	0	0	0	0	0	0	0	2.02328	0	0	0	0	0	1.45432	0	1.1593	0.739006	0	0	0.739006	0	0	0	0	0.739006	0.739006	0	1.45432	0.739006	0	0	0	0.739006	2.02328	0	0
319	CACAACATCACGTCCT.1_1	shNC	0	0	0	0.742682	0	0.742682	0	0	1.16413	0	2.16458	0.742682	0	0	0	0.742682	0	0.742682	0.742682	0	0	0	0	0	0	0	1.45971	0	0	0	0.742682	0	0.742682	0	0	0.742682	0	0	0	0	0	0	0	0	1.16413	0.742682	0
320	CACACAACATCGAACT.1_1	shNC	1.76158	0	0	0	0	0	0	0	0	0	0	1.76158	0	0	0	0	0	0	1.76158	0	0	0	0	0	1.76158	0	0	1.76158	0	0	0	0	0	0	0	0	3.22319	0	0	1.76158	0	0	1.76158	0	2.36492	0	0
321	CACAGGCCATCGCTGG.1_1	shNC	0.868975	0.868975	0	0	0	0.868975	0	0	0	0	0	0	0.868975	0	0	0	0	0	0.868975	0	0	0	0	0	0.868975	0	0.868975	0.868975	0.868975	0	0.868975	0	0	0	0	0.868975	2.36943	0	0	0	0	0	0	0	1.87761	1.32679	0
323	CACCGTTCACTCCTTG.1_1	shNC	0.41469	0	0.706952	0.41469	0	1.40693	0	0	0.41469	0	0	0.706952	0	0	0	0.706952	0	0.932834	0.41469	0	0.932834	0	0	0	1.40693	0.41469	0.706952	1.27243	0	0	0.706952	0	0	0.706952	0.41469	0.706952	1.63144	0	1.11698	0	0	0	0	1.27243	1.27243	0.932834	0
324	CACCGTTGTCTTGTCC.1_1	shNC	0	0	0	0	0	0	0	0	0	0	0	0	0	0	2.42094	0	0	0	2.42094	0	0	0	0	0	3.06865	0	0	0	0	0	0	0	0	0	0	0	2.42094	0	0	0	0	0	2.42094	0	0	0	0
326	CACGAATAGGGCCAAT.1_1	shNC	0	0	0	0	0	0	0	0	0	0	0	0	0	0	0	0	0	0	3.20895	0	0	0	0	0	0	0	2.82348	0	0	0	0	0	0	0	0	0	0	0	0	0	0	0	0	0	0	0	0
328	CACGTTCGTTACTCAG.1_1	shNC	1.08494	0.682907	0	0.682907	0	1.37089	0	0	0	0	0	0	0	0	0.682907	0	0	0	0	0	0	1.08494	0	0.682907	1.08494	0.682907	2.17895	0.682907	0.682907	0	1.37089	0	0.682907	0	0	0	1.37089	0	0.682907	0	0	0	0	0	1.37089	1.37089	0
329	CACGTTCTCCCATGGG.1_1	shNC	0	0	0	0	0	1.0572	0	0	0	0	0	0	1.0572	0	0	0	0	0	3.30674	0	0	0	0	0	2.77423	0	1.0572	0	0	0	0	0	1.0572	0	0	1.55953	1.55953	0	1.0572	0	0	0	0	0	1.55953	0	0
330	CACTGAAAGGGCAAGG.1_1	shNC	0	0	0	0	0	0	0	0	2.1476	0	0	0	0	0	2.78059	0	0	0	3.16517	0	0	0	0	0	0	0	0	0	0	0	2.1476	0	0	0	0	0	0	0	0	0	0	0	0	2.1476	0	0	0
335	CACTTCGCAGGAATCG.1_1	shNC	0	0	0	0	0	0	0	0	0	0	0	2.0804	0	0	0	0	0	0	2.70908	0	0	0	0	0	0	2.0804	0	0	0	0	0	0	0	0	0	0	2.70908	0	0	0	0	0	0	0	0	0	0
336	CACTTCGTCGCAGTCG.1_1	shNC	1.94113	0	0	1.94113	0	1.94113	0	0	0	0	0	0	0	0	0	0	0	0	2.5598	0	0	0	0	0	0	0	0	0	0	0	0	0	0	1.94113	0	0	0	0	0	0	0	0	0	0	0	0	0
337	CAGATTGAGCCAAGTG.1_1	shNC	0	0	0	2.5576	0	0	0	0	0	0	0	1.60307	0	0	0	0	0	0	2.82572	0	0	0	0	0	1.60307	0	0	0	0	0	0	0	0	0	0	1.60307	2.19014	0	0	0	0	0	0	0	0	0	0
339	CAGATTGGTGCAAGAC.1_1	shNC	0	0	0	0	0	0	0	0	0	0	0	0	0	0	0	0	0	0	2.42234	0	0	0	0	0	2.42234	0	0	0	0	0	2.79779	0	0	0	0	0	3.73978	0	0	0	0	0	0	0	1.81419	0	0
340	CAGCAATCAGGTGACA.1_1	shNC	0	0	0	1.79552	0	0	0	0	0	0	0	0	0.98365	0	0	0	0	0	2.54313	0	0	0	0	0	2.66678	0	1.79552	0	0	0	0.98365	0	0	0.98365	0	0	2.23762	0	1.46981	0	0	0	0	0	0.98365	0	0
342	CAGCGTGAGTTGGAAT.1_1	shNC	0	0	0	0	0	2.11906	0	0	1.53937	0	0	0	0	0	0	0	0	0	3.41093	0	0	0	1.53937	0	0	0	1.53937	1.53937	0	0	0	0	0	0	0	0	1.53937	0	0	0	0	0	1.53937	1.53937	0	0	0
343	CAGCGTGGTTCGGGTC.1_1	shNC	0	2.32484	0	2.32484	0	0	0	0	0	0	0	0	0	0	0	0	0	0	0	0	0	0	0	0	0	0	0	0	0	0	0	0	0	0	0	0	0	0	2.32484	0	0	0	0	0	0	0	0
345	CAGTGCGCAATGTGGG.1_1	shNC	0	0	0.880965	0	0	0	0	0	1.34194	0	0	1.65626	0	0	0	0	0	0	1.89505	0	0	0	0	0	1.34194	0	1.65626	0	0.880965	0	0	0	1.65626	0	0	0	0	0	0.880965	0	0	0	0	0	0.880965	0	0
346	CAGTTCCAGCCGGATA.1_1	shNC	0	0	0	0.939747	0	0.939747	0	0	0	0	0	0.939747	0.939747	0	0	0	0	0	1.7366	0	0	0	0	0	2.33757	2.33757	1.41553	0	0	0	0.939747	0	0	0	0.939747	0.939747	1.41553	0	0	0	0	0	0	0	1.41553	0	0
348	CAGTTCCCAGCTGAAG.1_1	shNC	1.19727	0	0	1.72671	0	1.19727	0	0	0	0	0	0	0	0	0	0	0	0	0	0	1.19727	0	0	0	0	0	1.19727	0	0	0	1.72671	0	1.72671	0	0	0	1.19727	0	1.19727	1.19727	0	0	0	1.19727	2.07106	0	0
349	CAGTTCCGTTCCACAA.1_1	shNC	0	2.00787	0	2.00787	0	0	0	0	0	0	0	0	0	0	0	0	0	0	2.00787	0	0	0	0	0	0	0	0	0	0	0	0	0	0	0	0	0	0	0	0	0	0	0	0	0	0	0	0
353	CATCAAGCACCATATG.1_1	shNC	1.55127	0	1.05038	0	0	2.13238	0	0	0	0	0	0	0	0	1.05038	1.05038	0	0	1.55127	0	0	0	0	0	1.05038	0	1.55127	1.05038	0	0	1.05038	0	0	0	1.55127	1.05038	0	0	2.13238	0	0	0	0	0	2.76442	1.05038	0
357	CATGAGTGTATGAGCG.1_1	shNC	0	0	0	0	0	0	0	0	1.98749	0	0	0	0	0	0	0	0	0	0	0	0	0	0	0	0	0	0	0	0	0	0	0	0	0	0	0	2.9903	0	0	0	0	0	0	0	1.98749	0	0
358	CATGCAAAGACAACTA.1_1	shNC	1.48852	0	0	0	0	0	0	0	0	0	0	0	0	0	0	0	0	0	2.68935	0	0	0	0	0	0	0	1.48852	0	0	0	0	0	1.48852	0	0	0	0	0	0	0	0	0	0	0	1.48852	0	0
359	CATGCAACATCATTTC.1_1	shNC	0	0	0	1.36493	0	0	0	0	0	0	0	0	0	0	0	0	0	0	2.53859	0	0	0	0	0	1.36493	0	1.92146	0	0	0	0	0	0	0	0	1.92146	0	0	0	0	0	0	0	0	0	0	0
360	CATGCGGCACTTCCTG.1_1	shNC	0.928307	0	0	1.7211	0	0.928307	0	0	0	0	0	0.928307	0	0	0.928307	0	0	0	1.7211	0	0	0	0	0	1.40129	1.40129	2.15769	0	0	0	0.928307	0	0.928307	0	1.7211	0	1.40129	0	0	0	0	0	0.928307	1.40129	0.928307	0	0.928307
361	CATGGATGTACGCGTC.1_1	shNC	0	0	0	1.46865	0	0	0	0	0	0	0	0	0	0	0	0	0	0	0	0	0	0	0	0	0	0	2.0395	1.46865	0	0	1.46865	0	0	0	0	0	2.40063	0	1.46865	0	0	0	0	0	0	1.46865	0
363	CATGGTATCCCAACTC.1_1	shNC	0	0	0	1.28738	0	0	0	0	0	0	0	1.28738	0	0	0	0	0	0	0	0	0	0	0	0	1.83204	0	0	0	0	0	2.18266	0	0	0	0	1.83204	2.18266	0	0	0	0	0	0	0	0	0	0
366	CATTGAGAGTAGACCG.1_1	shNC	0	0	0	0	1.42265	2.18271	0	0	1.42265	0	0	0	0	0	0	0	0	0	1.42265	0	0.945484	0	0	0	2.34606	0.945484	0.945484	1.74435	0.945484	0.945484	0	0	0	0	0	0	0	0	0	0	0	0	1.42265	0	0.945484	0	0
367	CATTGAGCATGCGGTC.1_1	shNC	1.03774	0	0	0	0	1.03774	0	0	0	0	0	0	1.03774	0	1.03774	0	0	0	2.31393	0	0	0	0	0	1.53593	0	1.86694	0	0	0	0	0	0	0	0	1.03774	1.53593	0	1.03774	0	0	0	0	0	1.53593	1.03774	0
369	CATTGCCGTCATAGTC.1_1	shNC	0	0	0	0	0	0	0	0	0	0	0	1.72785	0	0	0	0	0	0	0	0	0	1.19824	0	0	2.7004	0	0	0	0	0	0	0	0	0	0	0	1.19824	0	0	0	0	0	0	0	0	1.19824	0
371	CATTGTTAGTGCACTT.1_1	shNC	1.32042	0	0	1.87026	0	1.32042	0	0	0	0	0	1.32042	0	0	1.32042	0	0	0	1.32042	0	0	0	0	0	2.86048	1.32042	1.32042	1.87026	1.87026	1.32042	1.32042	0	0	0	0	0	2.223	0	0	0	0	0	0	0	0	1.32042	0
373	CATTTCAAGGCTAAAT.1_1	shNC	0	0	0	0	0	0	0	0	0	0	0	0	0	0	0	0	0	0	2.22471	0	0	0	0	0	0	0	0	1.63421	0	0	0	0	1.63421	0	1.63421	0	0	0	1.63421	0	0	0	1.63421	0	0	0	0
377	CCAATGAGTGAACTAA.1_1	shNC	0	0	0	1.9727	0	1.9727	0	0	0	0	0	0	0	0	2.33069	0	0	0	2.80185	0	0	0	0	0	1.9727	0	2.33069	0	0	0	1.40977	0	0	1.40977	0	0	1.40977	0	0	0	0	0	0	0	1.40977	0	0
378	CCAATGAGTGGATCGA.1_1	shNC	0	1.07188	1.07188	0	0	1.9114	0	0	1.57727	0	0	0	0	0	0	0	0	0	2.79526	0	0	0	0	0	1.57727	1.07188	1.57727	0	0	1.57727	0	0	0	0	0	0	1.57727	0	0	0	0	0	0	0	2.16142	0	0
383	CCACGAGCATAGAGGC.1_1	shNC	0.844489	0	0.844489	0	0	2.26427	0	0.50886	0.844489	0	0	0	0.50886	0	0	0	0	0	2.19285	0	0	0	0.50886	0	1.84168	0	1.09533	1.29571	0	0	0.50886	0	0.844489	0.50886	0	1.09533	1.46255	0	0.50886	0	0	0	0	0.50886	2.19285	0.50886	0
384	CCACGAGGTTGTGGAG.1_1	shNC	0	0	0	0	0	0	0	0	0	0	0	1.49735	0	0	0	0	0	0	2.43444	0	0	0	0	0	1.49735	0	2.43444	0	0	0	0	0	1.49735	0	0	0	2.07187	0	0	0	0	0	1.49735	0	0	0	0
385	CCACTTGAGCACTCCG.1_1	shNC	0	0	0	0.985752	0	0.985752	0	0	0	0	0	0	0	0	0	0	0	0	0	0	0	0	0	0	0	0	0.985752	0	0	0	0	0	0	0	0	0	1.47239	0	0	0	0	0	0.985752	0.985752	0	0.985752	0
386	CCACTTGAGGAACATT.1_1	shNC	0	1.63954	0	1.63954	0	1.63954	0	0	0	0	0	0	0	0	0	0	0	0	3.53289	0	1.63954	0	0	1.63954	2.23062	0	0	0	0	0	0	0	0	0	0	1.63954	0	0	1.63954	0	0	0	0	0	0	0	0
387	CCACTTGCAAGAGTTA.1_1	shNC	1.30103	1.30103	0	0	0	0	0	0	0	0	0	1.30103	0	0	0	0	0	0	1.84785	0	0	0	0	0	1.84785	0	0	0	0	0	0	0	0	0	0	1.30103	1.30103	0	0	0	0	0	1.30103	1.30103	1.84785	0	0
388	CCATCACGTCCCACGA.1_1	shNC	0	0	0	2.15381	0	1.06623	0	0	0	0	0	1.06623	0	0	0	0	0	1.06623	2.15381	0	0	0	0	0	1.57045	0	0	0	0	0	0	0	0	0	0	0	2.15381	0	0	0	0	0	1.06623	0	2.15381	1.06623	0
391	CCCGAAGAGTAACAGT.1_1	shNC	0	0	0	0	0	0	0	0	0	0	0	0	0	0	0	0	0	0	1.51565	0	0	0	0	0	2.45592	0	2.09246	1.51565	0	0	2.09246	0	0	0	0	0	1.51565	0	0	0	0	0	0	0	0	0	0
392	CCCGAAGCAGAACCGA.1_1	shNC	0	0	0	0	0	0	0	0	0.90415	0	0	0.90415	0	0	0	0	0	1.16463	1.16463	0	0	0.550959	0	0	1.54214	0	0.550959	0	0.550959	0	0	0	0.550959	0.550959	0.90415	0	0.550959	0	0.90415	0	0	0	0	0	0.550959	0	0
393	CCCGGAACACTACCCT.1_1	shNC	1.70116	0	0	0	0	0	0	0	0	0	0	0	0	0	0	0	0	0	2.29863	0	0	0	0	0	0	1.70116	0	0	0	0	0	0	0	0	1.70116	0	0	0	0	0	0	0	1.70116	0	0	0	0
395	CCCTGATGTAGATCCT.1_1	shNC	1.4079	0	0	0	0	0	0	0	0	0	0	1.4079	0	0	0	0	0	0	1.97057	0	0	0	0	0	1.4079	0	1.97057	0	0	0	1.4079	0	0	0	1.4079	0	2.97166	0	1.4079	0	0	0	0	0	2.59148	1.4079	0
396	CCCTTAGTCGGACAAG.1_1	shNC	0	0	0	0	0	0	0	0	0	0	0	0	0	0	0	0	0	0	1.99104	0	0	0	0	0	1.42589	0	1.99104	0	0	0	0	0	0	0	0	0	1.42589	0	1.99104	0	0	0	0	1.99104	1.42589	1.42589	0
397	CCGATCTCATAGAGGC.1_1	shNC	0	0	0	0	0	0	0	0	0	0	0	0	0	0	0	0	0	0	1.71934	0	0	0	0	0	2.69074	0	2.96132	0	0	0	0	0	0	0	0	0	2.69074	0	0	0	0	0	0	0	0	1.71934	0
398	CCGATCTTCTGAACGT.1_1	shNC	0	0	0	0	0	0	0	0	0	0	0	2.40796	0	0	0	0	0	0	3.94267	0	0	0	0	0	2.40796	0	2.40796	0	0	0	0	0	0	0	0	0	0	0	0	0	0	0	0	0	0	0	0
401	CCGGACAAGAGGCTGT.1_1	shNC	0	0	0.353506	0.614161	0	1.37835	0	0	0.820729	0	1.47988	1.13792	0	0	0	0.353506	0	0.614161	1.13792	0	0	0	0.353506	0	0.353506	0	0.353506	0.614161	0	0	0	0	0	0.353506	0	0.614161	0	0	0.820729	0.353506	0	0	0	0	0.991847	0	0
402	CCGGACACAGAGTGTG.1_1	shNC	0	0.69966	0	0.69966	0	1.10729	0.69966	0	1.10729	0	0	0	0	0	0	0	0.69966	0	1.39605	0	0.69966	0	0	0	1.61984	1.61984	1.80259	1.39605	1.61984	0	0.69966	0	0	0	0	0.69966	0.69966	0	0.69966	0.69966	0	0	0	0	0.69966	0	0
405	CCGGTGACATTCAGCA.1_1	shNC	0	0	0	1.4625	0	1.4625	0	0	0	0	0	2.03255	0	0	0	0	0	0	1.4625	0	0	0	0	0	1.4625	0	0	0	0	0	0	0	0	0	1.4625	1.4625	2.65795	0	0	0	0	0	0	0	2.39336	0	0
406	CCGTAGGGTGTTAACC.1_1	shNC	1.56849	1.56849	0	0	0	0	0	0	0	0	0	0	0	0	0	0	0	0	1.56849	0	0	0	1.56849	0	0	0	1.56849	1.56849	0	0	0	0	0	0	0	1.56849	1.56849	0	0	0	0	0	0	1.56849	1.56849	0	0
407	CCGTTCACACACCTTC.1_1	shNC	1.84538	1.2989	1.84538	0	0	0	0	0	0	0	0	1.2989	0	0	0	0	0	0	2.66209	0	0	0	0	0	1.2989	0	1.2989	0	0	0	1.84538	0	0	0	0	1.2989	2.45625	0	1.84538	0	0	0	0	1.2989	1.84538	1.2989	0
408	CCTAACCCAACACGTT.1_1	shNC	0	1.73995	0	1.73995	0	0	0	0	0	0	0	0	0	0	0	0	0	0	0	0	0	0	0	0	2.34124	1.73995	0	1.73995	0	0	2.98508	0	2.71411	1.73995	0	1.73995	3.19807	0	0	0	0	0	0	0	1.73995	0	0
409	CCTAACCCAGCTACAT.1_1	shNC	0	0	0	2.44487	0	0	0	0	0	0	0	0	0	0	1.28986	0	0	0	2.96661	0	0	0	0	0	0	1.28986	1.28986	1.83491	0	0	0	0	0	1.83491	0	1.28986	1.28986	0	1.28986	1.28986	0	0	0	0	0	0	0
412	CCTACGTGTATTCTCT.1_1	shNC	1.79023	0	0	0.979685	0	0	0	0	0.979685	0	0	0	0	0	0	0	0	0	2.03529	0	0	0	0	0	1.46493	0	1.46493	0.979685	0	0	0	0	0	0	0	1.46493	2.66088	0	0	0	0	0	0	0.979685	1.79023	1.46493	0.979685
414	CCTCAACTCAACCTTT.1_1	shNC	0	1.39021	0	0	0	0	0	0	0	0	0	0	1.39021	0	1.39021	0	0	0	2.30728	0	0	0	0	0	2.56976	0	0	2.30728	0	0	0	0	0	0	0	2.56976	1.95038	0	2.30728	0	0	0	0	1.39021	2.77748	0	0
417	CCTCCAATCGTCGCTT.1_1	shNC	0	0	0	0	0	1.97992	0	0	0	0	1.97992	1.97992	0	0	0	0	0	0	0	0	0	0	0	0	3.2569	0	0	0	0	0	0	0	0	0	0	1.97992	0	0	0	0	0	0	0	0	1.97992	1.97992	0
419	CCTCTAGGTCTGTAAC.1_1	shNC	0	0.811556	0	0.811556	0	0	0	0	0	0	0	1.25357	1.25357	0	0	0	0	0.811556	0	0	0	0	0	0.811556	0.811556	0	0.811556	1.55903	0	0	1.25357	0	0.811556	0	0.811556	0	1.98197	0	0	0	0	0	0	0.811556	0.811556	0	0
420	CCTCTCCAGGTCGCCT.1_1	shNC	0	0	0	1.62958	0	0	0	0	1.62958	0	0	2.21958	0	0	0	0	0	0	2.58815	0	0	0	0	0	1.62958	0	1.62958	0	0	0	1.62958	0	1.62958	0	0	0	1.62958	0	0	1.62958	0	0	0	0	0	1.62958	0
421	CCTGCATAGCACTTTG.1_1	shNC	0.674106	1.07314	0	0.674106	0	0	0	0	0	0	0	0.674106	0	0	0.674106	0	0	0	1.91304	0	0	0	0	0	2.16312	0	2.04588	1.07314	0	0	1.07314	0	1.07314	0.674106	0	0.674106	1.5788	0	0	0.674106	0	0	0.674106	0.674106	1.75982	0	0
422	CCTGTTGTCAACCCGG.1_1	shNC	0	0	0	1.88385	0	0	0	0	1.33221	0	0	0	0	0	0	0	0	0	1.33221	0	0	0	0	0	0	0	0	0	0	0	0	0	1.33221	0	0	0	0	0	0	0	0	0	0	0	0	0	0
423	CCTTCAGGTACCACGC.1_1	shNC	1.01983	0	0	0	0	2.28886	0	0	0.634653	0	0	0.634653	0	0	0	0	0	0	1.69228	0	0.634653	0.634653	0	0	1.97472	0	1.51413	1.69228	1.01983	0	0.634653	0	0.634653	0	0.634653	0.634653	1.01983	0	1.01983	0	0	0	0.634653	0	0.634653	0	0
425	CCTTTGGAGGTGCTTT.1_1	shNC	0	0	0	2.39291	0	1.78719	0	0	0	0	0	1.78719	0	0	0	0	0	0	2.76745	0	0	0	0	0	0	0	1.78719	2.39291	0	0	0	0	0	0	0	0	1.78719	0	0	0	0	0	1.78719	0	0	1.78719	0
426	CCTTTGGCACGCGCAT.1_1	shNC	0	0	0	0	0	0	0	0	0	0	0	0	0	0	0	0	0	0	0	0	0	0	0	0	0	0	2.79418	2.1604	0	0	2.1604	0	0	0	0	0	2.79418	0	0	0	0	0	0	0	0	0	0
427	CGAAGGAAGAAACTGT.1_1	shNC	0	0	0.605644	0	0	1.25199	0	0	0.605644	0	0	0.605644	0	0	0	0	0	0	1.92089	0	0	0	0	0	1.92089	1.4655	0.605644	1.4655	1.4655	0.980153	0	0	0	0	0	0.605644	1.4655	0	1.4655	0	0	0	0	0	1.64135	0.605644	0
428	CGAAGGACACGTGAGA.1_1	shNC	0	0	0	1.90887	0	1.35396	0	0	0	0	0	0	0	0	0	0	0	0	0	0	0	0	1.35396	0	1.35396	0	1.35396	0	0	0	0	0	0	0	0	0	0	0	1.90887	0	0	0	0	0	1.35396	0	0
429	CGAAGTTTCTTCTTCC.1_1	shNC	0	0	1.10885	1.10885	0	1.10885	1.10885	0	0	0	0	1.10885	0	0	0	0	1.10885	0	1.10885	0	0	0	0	0	1.62171	1.10885	1.10885	1.10885	0	1.10885	1.62171	0	0	0	1.10885	0	0	0	1.95905	0	0	0	0	0	1.95905	0	0
430	CGAATTGCAGTTCCAA.1_1	shNC	0	0	0	1.81937	0	0	0	0	0	0	0	0	0	0	0	0	0	0	1.81937	0	0	0	0	0	2.8036	1.81937	0	1.81937	0	0	0	0	0	1.81937	0	0	3.61566	0	1.81937	0	0	0	0	0	0	0	0
431	CGAATTGGTGTGTCGC.1_1	shNC	0	0	0	0	0	0	0	0	0	0	0	0	0	0	0	0	0	0	0	0	0	0	0	0	0	0	0	0	0	0	2.47897	0	0	0	0	0	0	0	0	0	0	0	0	0	0	0	0
433	CGACAGCGTATCAGCT.1_1	shNC	0	0	0	0	0	0	0	0	0	0	0	0	0	0	0	0	0	0	2.07369	0	0	0	0	0	1.49896	0	2.07369	0	0	0	1.49896	0	0	0	0	1.49896	2.07369	0	0	0	0	0	0	0	1.49896	0	0
438	CGAGTGCAGATGAACT.1_1	shNC	1.43362	0	1.43362	1.43362	0	0	0	0	0	0	0	1.43362	0	0	0	0	0	0	1.99982	0	0	0	0	0	0	0	0	0	0	0	0	0	0	0	1.43362	0	1.99982	0	0	0	0	0	0	0	0	1.43362	0
443	CGCAGGTCACGTATAC.1_1	shNC	0	0	1.70963	0	0	0	0	0	0	0	0	0	0	0	0	0	0	0	0	0	0	0	0	0	1.70963	0	1.70963	1.70963	0	0	0	0	0	0	0	0	2.30796	0	0	0	0	0	0	0	0	0	0
444	CGCAGGTGTGACCGAA.1_1	shNC	0.971958	0	0	0	0	0.971958	0	0	0	0	0	0.971958	0.971958	0	0.971958	0	0	0	1.77991	0	0	0	0	0	0.971958	0.971958	0	0	0	0	0	0	0	0	0	0.971958	1.77991	0	0.971958	0	0	0	0	0.971958	0.971958	0	0
445	CGCATAACAATTGAAG.1_1	shNC	0	0	0	0	0	0	0	0	0	0	0	1.28247	1.28247	0	0	0	0	0	1.28247	0	0	0	0	0	2.17663	0	1.28247	0	0	0	1.82633	0	0	0	0	0	1.82633	0	1.82633	0	0	0	0	0	1.28247	0	0
446	CGCATAAGTATTCTCT.1_1	shNC	0	0	0	1.43031	0	1.43031	0	0	1.13783	0	0	0	0	0	0	0	0	0	1.99606	0	1.43031	0	0.722704	0	2.35517	1.13783	0.722704	1.65632	1.43031	0	0	0	0	0	0	0.722704	0	0	1.43031	0	0	0.722704	0.722704	0	1.13783	0.722704	0.722704
447	CGCATGGAGTGCACCC.1_1	shNC	0	0	0	0	0	0	0	0	0	0	0	0	0	0	0	0	0	1.76277	1.76277	0	0	0	0	0	1.76277	0	0	0	0	0	0	0	0	0	0	0	1.76277	0	1.76277	0	0	0	0	0	0	0	0
450	CGCCATTCACGCGCTA.1_1	shNC	0.858422	1.62498	1.31342	0.858422	0	0.858422	0	0	0	0	0	0.858422	0	0	0	0	0	0	0.858422	0	0	0	0.858422	0	0.858422	0	1.62498	0.858422	0	0	0	0	0	0	0.858422	1.62498	0	0	0	0	0	0	0	0.858422	1.31342	0	0
451	CGCCATTCACTTGAAC.1_1	shNC	0	0	0	0	0	1.88362	0	0	0	0	0	0	0	0	0	0	0	0	1.88362	0	0	0	0	0	2.87536	0	0	0	0	0	1.88362	0	0	0	0	0	0	0	0	0	0	0	1.88362	0	0	0	0
456	CGGGACTAGGACAGCT.1_1	shNC	0.401537	0.68725	0.401537	0	0	1.49489	0	0.401537	0.90921	0	0.401537	0	0	0	0	0	0	1.37744	0.90921	0	0	0	0.401537	0	1.49489	0	0.90921	0	0	0	0.68725	0	0	0	0.401537	0.90921	1.09074	0	1.09074	0	0	0	0	0.68725	1.24433	0	0
457	CGGGCATAGCGCCTTG.1_1	shNC	0	0	0	2.87641	0	0	0	0	0	0	0	0	0	0	0	0	0	0	3.26292	0	0	0	0	0	0	2.87641	0	0	0	0	0	0	0	0	0	0	0	0	0	0	0	0	0	0	0	0	0
459	CGGGTCACAGATCATC.1_1	shNC	0	0	0	0	0	1.60466	0	0	1.60466	0	0	0	0	0	0	0	0	0	0	0	1.60466	0	1.60466	0	1.60466	0	1.60466	1.60466	0	0	0	0	0	0	0	0	0	0	1.60466	0	0	0	0	0	0	0	0
461	CGGTCAGGTATGTGTC.1_1	shNC	0	0	0	0	0	0	0	0	0	0	0	0	0	0	0	0	0	0	2.3911	0	0	0	0	0	0	0	0	1.78554	0	0	0	0	0	0	0	0	0	0	0	0	0	0	0	0	0	0	0
462	CGGTCAGTCTCCGTGT.1_1	shNC	1.33674	0	0	0	0	1.33674	0	0	0	0	0	0	0	0	0	0	0	1.33674	2.24282	0	0	0	0	0	1.33674	0	1.88907	0	0	0	1.88907	0	1.33674	0	0	0	2.24282	0	0	0	0	0	0	0	1.88907	0	0
463	CGTAAGTCATCGGATT.1_1	shNC	0.687545	0	0.687545	0	0.687545	2.38769	1.60046	0	1.09114	0	0	0	0	0	0.687545	0	0	0	0.687545	0	0	0	0	0	2.18724	0.687545	1.60046	1.7824	0.687545	0	0	0	0	0	0.687545	0	0.687545	0	0	0	0	0	0	0	1.09114	1.37788	0
464	CGTAGTAAGCGATCGA.1_1	shNC	0	0	0	0	0	0	0	0	0	0	0	0	0	0	0	0	0	0	3.41369	0	0	0	0	0	0	0	1.92796	0	0	0	0	0	0	0	0	0	0	0	1.92796	0	0	0	0	0	1.92796	0	0
466	CGTAGTATCACCTCGT.1_1	shNC	0	0	0	0	0	1.39998	0.476869	0	0	0	1.39998	0.798428	0	0	0	0	0	1.04136	0.798428	0	0.798428	0	0	0	0.798428	0	1.39998	0.476869	0	0.476869	0.798428	0	0	0	0.798428	0.798428	1.66339	0	1.04136	0	0	0	0	0	1.04136	0	0
467	CGTAGTATCGGTGTTA.1_1	shNC	0.998782	0.998782	0	0.998782	0	1.81562	1.81562	0	0	0	0	0.998782	0.998782	0	0	0	0	0	1.48839	0	0.998782	0	0	0	0	0	0	1.48839	0	0	0.998782	0	0.998782	0	0	0	2.06177	0	1.48839	0	0	0	0	0	0.998782	0.998782	0
468	CGTCAAACATGTTACG.1_1	shNC	1.12855	0	0	1.12855	0	0	0	0	0	0	0	1.64526	0	0	0	0	0	0	1.12855	0	0	0	0	0	0	0	1.98424	1.12855	0	0	0	0	0	0	0	0	1.12855	0	0	0	0	0	0	0	0	0	0
469	CGTCCATAGAAGCGAA.1_1	shNC	1.05244	0.658718	0	0	0	1.05244	0	0	0.658718	0	1.05244	1.3342	0	0	0	1.05244	0	0.658718	0.658718	0	0	0	0	0	1.05244	0	0.658718	0.658718	1.55377	0	0	0	0.658718	0.658718	1.05244	0.658718	0	0	1.55377	0	0	0	0	0	0	0	0
472	CGTGATAGTTCTGACA.1_1	shNC	0	0	0	1.71859	0	0	0	0	0	0	0	0	0	0	0	0	0	0	2.68988	0	0	0	0	0	1.71859	0	1.71859	0	0	0	1.71859	0	0	0	0	1.71859	0	0	0	0	0	0	1.71859	0	0	0	1.71859
473	CGTGATATCTCCGTGT.1_1	shNC	0	0	0	0	0	0	0	0	0	0	0	1.34908	1.34908	0	0	0	0	0	1.90327	0	0	0	0	0	0	0	1.34908	0	0	0	0	0	0	1.90327	0	1.34908	1.34908	0	1.34908	0	0	0	0	0	0	1.90327	0
474	CGTGCTTAGAGGTATT.1_1	shNC	0	0	0	0	0	1.30572	0	0	0	0	0	1.30572	0	0	0	0	0	0	2.46482	0	0	0	0	0	1.30572	0	1.30572	0	0	0	0	0	1.85328	0	0	0	0	0	0	0	0	0	0	0	0	1.30572	0
476	CGTTGGGTCTCTGCTG.1_1	shNC	0	0	0	1.25941	0	0	0	0	0	0	0	0	0	0	0	0	0	0	2.14827	0	0	0	0	0	1.25941	0	0	0	0	0	1.25941	0	0	0	1.25941	0	1.79951	0	0	0	0	0	0	0	1.79951	0	0
477	CTAACTTAGCAATTAG.1_1	shNC	2.33742	2.33742	0	0	0	0	0	0	0	0	0	2.33742	0	0	0	0	0	0	2.98108	0	0	0	0	0	0	0	0	0	0	0	0	0	0	0	0	0	0	0	0	0	0	0	0	0	0	0	0
480	CTACAGAAGGACTGGT.1_1	shNC	1.87702	1.87702	0	2.49056	0	0	0	0	1.87702	0	0	0	0	0	1.87702	0	0	0	2.49056	0	0	0	0	0	1.87702	0	1.87702	0	0	0	0	0	0	0	0	0	0	0	0	0	0	0	0	0	0	0	1.87702
483	CTACATTCAGTTGTTG.1_1	shNC	0	0	0	2.10091	0	0	0	0	0	0	0	0	0	0	0	0	0	0	0	0	0	0	0	0	2.73093	0	0	0	0	0	2.10091	0	0	0	0	2.10091	0	0	0	0	0	0	0	0	0	0	0
486	CTACCCATCTTAGCAG.1_1	shNC	0	1.32324	0	2.22643	0	0	0	0	0	0	0	0	0	0	0	0	0	0	1.87352	0	0	0	0	0	1.32324	0	1.32324	0	0	0	0	0	1.32324	1.32324	0	0	2.48676	0	0	0	0	0	0	1.32324	0	0	0
487	CTACCTGAGTTGGGAC.1_1	shNC	0	0	0	1.85124	0	0	0	0	0	0	0	0	0	0	0	0	0	0	3.11221	0	0	0	0	0	0	0	0	0	0	0	1.85124	0	0	0	0	0	0	0	0	0	0	0	0	0	0	0	0
489	CTACCTGGTGCATGAG.1_1	shNC	0	0	0	1.51955	0	0	0	0	0	0	0	0	0	0	0	0	0	0	2.09683	0	0	0	0	0	2.72658	0	0	0	0	0	0	0	0	0	0	0	1.51955	0	0	0	0	0	0	0	1.51955	0	0
490	CTACCTGTCACAACCA.1_1	shNC	0.973801	0	0	0	0.973801	1.78238	0	0	0.973801	0	0	0	0	0	0	0	0	0	1.45768	0	0	0	0	0	0	0	1.45768	1.45768	0	0	0	0	0.973801	0	0	2.02709	2.5286	0	0	0	0	0	0	0	1.78238	0.973801	0
491	CTACGGGTCACACCCT.1_1	shNC	0	0	0	0	0	0	0	0	0	0	0	0	0	0	0	0	0	0	0	0	0	2.5554	0	0	0	0	0	0	0	0	0	0	0	0	2.5554	0	3.20895	0	2.5554	0	0	0	0	2.5554	0	0	0
492	CTACTATGTTCGTACA.1_1	shNC	1.27369	0	0	0	0	1.27369	0	0	0	0	0	1.81613	0	0	0	0	0	1.27369	0	0	0	0	0	0	1.81613	0	1.27369	1.27369	0	0	0	0	0	0	0	0	2.16585	0	0	0	0	0	0	0	2.16585	0	0
493	CTAGACAGTCCTACAA.1_1	shNC	0	0	0	1.15526	0	0	0	0	0	0	0	1.15526	0	0	1.15526	0	0	0	2.01817	0	0	0	0	0	1.67704	0	1.67704	1.15526	0	0	1.67704	0	0	0	0	0	3.1245	0	0	0	0	0	0	0	1.15526	0	0
494	CTAGACATCCGGCAAC.1_1	shNC	0	0	0	0	0	0	0	0	0	0	0	0	0	0	0	0	0	0	0	0	0	0	0	0	1.31362	0	0	0	1.31362	0	1.31362	0	0	0	1.31362	1.31362	1.31362	0	0	0	0	0	0	1.31362	0	0	0
495	CTATCTAGTCTGTGTA.1_1	shNC	0	0	0	0	0	0	0	0	0	0	0	0	0	0	0	0	0	0	0	0	0	0	0	0	2.49107	0	2.49107	0	0	0	2.49107	0	0	0	0	0	0	0	2.49107	0	0	0	0	0	0	0	0
498	CTCACTGGTCGAAGCA.1_1	shNC	0	0	0	0	0	1.93519	0	0	0	0	0	0	0	0	1.59943	0	0	0	2.38652	0	0	0	0	0	1.59943	0	1.09028	0	0	0	1.59943	0	0	0	1.59943	0	1.93519	0	0	0	0	0	0	0	1.93519	0	0
499	CTCAGAAGTTTCGTAG.1_1	shNC	1.08106	1.08106	0	1.92328	0	0	0	0	0	0	0	0	0	0	1.92328	0	0	0	1.92328	0	0	0	0	0	1.08106	0	1.92328	0	0	1.08106	0	0	1.08106	0	0	1.08106	1.08106	0	0	0	0	0	0	0	0	0	0
500	CTCAGAATCGCAGTGC.1_1	shNC	0.944907	0	0.421464	0.421464	0	1.54102	0	0	0	0	0.421464	0.421464	0	0.944907	0.944907	0	0	1.28674	0	0	0	0	0.717051	0	1.28674	0	0.717051	1.13036	0	0	0.717051	0	0	0.717051	0.944907	1.13036	1.13036	0	0.944907	0	0	0	0	0.421464	1.64741	0.421464	0
501	CTCAGGGCAGACAAGC.1_1	shNC	0	0	0	0	0	0	0	0	0	0	0	0	0	0	0	0	0	1.52234	0	0	0	0	0	0	0	0	0	1.52234	0	0	1.52234	0	0	0	0	0	0	0	0	0	0	0	1.52234	0	0	0	0
502	CTCAGGGGTGCAACAG.1_1	shNC	0	0	1.11556	1.11556	0	0	0	0	0	0	0	1.11556	0	0	0	0	0	0	1.62974	0	0	0	0	0	1.11556	0	1.11556	1.11556	0	0	0	0	1.62974	1.62974	0	0	0	0	0	0	0	0	0	1.11556	1.11556	0	0
505	CTCATGCCACGTTCGG.1_1	shNC	0	1.57211	0	0	1.0676	2.35537	0	0	0	0	0	0	0	0	0	0	0	0	1.90586	0	0	0	0	0	1.57211	1.90586	0	1.0676	0	0	0	0	0	0	0	1.0676	0	0	0	0	0	0	0	0	0	0	0
506	CTCATGCTCAGAGCAG.1_1	shNC	0	1.60656	0	2.56163	0	1.60656	0	0	0	0	0	0	0	0	0	0	0	0	3.49302	0	0	0	0	0	3.36383	0	0	1.60656	0	0	0	0	0	0	0	1.60656	2.19403	0	1.60656	0	0	0	0	0	0	0	0
509	CTCCACACATAATCGC.1_1	shNC	1.76458	0	0	0	0	0	0	0	0	0	0	1.22951	0	0	1.22951	0	0	0	1.76458	0	0	0	0	0	0	0	2.11126	1.22951	1.22951	0	0	0	1.22951	0	0	0	0	0	0	1.22951	0	0	0	0	1.22951	0	0
511	CTCCACATCCGTAATG.1_1	shNC	0	0	0	2.08071	0	0	0	0	0	0	0	0	0	0	0	0	0	0	0	0	0	0	1.50521	0	2.44367	0	1.50521	0	0	0	0	0	0	0	0	0	1.50521	0	0	0	0	0	0	0	1.50521	0	0
512	CTCCATGAGTCACTAC.1_1	shNC	0	0	0	0	0	0	0	0	0	0	0	0	0	0	0	0	0	0	0	0	0	0	0	0	1.87003	0	0	0	0	0	0	0	0	2.48298	0	0	0	0	0	0	0	0	0	0	0	0	0
513	CTCCATGCACAATCTG.1_1	shNC	1.20698	1.20698	0.577247	0.940888	0	0.577247	1.20698	0	0.577247	0	0	0.577247	0	0	0	0	0	0.577247	1.20698	0	1.20698	0	0	0	0.940888	0.940888	0.577247	0.940888	0.577247	0.577247	1.73814	0	0	0	0.577247	0.940888	0.940888	0	0.940888	0	0	0.577247	0	0	0.940888	0.577247	0
514	CTCCCAACATATACCG.1_1	shNC	0.923247	0.923247	0	0	0.923247	2.15028	0	0	0	0	0	0.923247	0	0	0	0	0	0	0	0	0	0	0	0	1.71422	0	0	1.71422	0	1.39498	0	0	0.923247	0	0	0	0	0	0	0	0	0	0	0	0	0	0
515	CTCCCAAGTCATAACC.1_1	shNC	0	0	0	1.09981	0	0	0	0	0	0	0	1.09981	0	0	0	0	0	0	2.19883	0	0	0	0	0	1.09981	0	1.09981	1.09981	0	0	0	0	0	0	0	1.09981	2.19883	0	1.61088	0	0	0	0	1.09981	2.19883	2.19883	0
516	CTCCCTCGTAGACAGC.1_1	shNC	0.717131	0	0	0	0	0.717131	0	0	0	0	0	1.42206	0	0	0	1.13046	0	0	2.75236	0	0	0	0	0	1.42206	0	1.42206	1.64754	0	0	1.42206	0	0	0	0	1.13046	1.64754	0	0	0	0.717131	0	0	0	0	0.717131	0
517	CTCCGATAGACAACTA.1_1	shNC	0	1.27759	0	1.27759	0	0	0	1.27759	1.27759	0	0	0	1.27759	0	0	0	0	0	0	0	0	0	0	0	1.27759	0	1.27759	0	0	0	1.27759	0	0	0	0	1.27759	2.95052	0	0	0	0	0	0	1.27759	1.82067	0	0
518	CTCCTTTAGTAGCCAG.1_1	shNC	1.38862	0	0	0	0	1.94857	0	0	0	0	0	1.38862	0	0	1.38862	0	0	0	1.38862	0	0	0	0	0	2.30538	0	1.38862	0	0	0	1.38862	0	1.38862	0	0	1.38862	0	0	0	0	0	0	0	0	0	1.38862	0
519	CTCCTTTGTCTGTGCG.1_1	shNC	0	0	0	0	0	0	0	0	0	0	0	0	0	0	0	0	0	0	0	0	0	0	0	0	0	0	2.19085	2.19085	0	0	2.19085	0	0	0	0	3.21199	2.19085	0	0	0	0	0	0	0	0	0	0
520	CTCGAGGAGGTAACTA.1_1	shNC	0	0	0	1.37368	0	1.37368	0	0	0	0	0	0	0	0	0	0	0	0	0	0	0	0	0	0	2.28743	0	1.37368	1.37368	0	0	1.37368	0	0	0	0	0	0	0	0	0	0	0	0	0	1.93148	1.93148	0
521	CTCGAGGTCTCAAAGC.1_1	shNC	0	1.72463	0	1.72463	0	1.72463	0	0	0	0	0	0	0	0	0	0	0	0	1.72463	0	0	0	0	0	0	0	1.72463	0	0	0	0	0	0	0	0	0	1.72463	0	0	0	0	0	0	0	0	0	0
522	CTCTCAGAGGTGCGAT.1_1	shNC	1.5215	0	0	0	0	0	0	0	0	0	0	0	0	0	0	0	0	0	3.69809	0	0	1.5215	0	0	0	0	0	1.5215	0	0	0	0	2.09902	0	0	0	0	0	0	0	0	0	0	1.5215	0	1.5215	1.5215
523	CTCTGGTAGCGATGAC.1_1	shNC	1.58896	1.58896	0	0	0	0	0	0	0	0	0	0	0	0	0	0	0	0	0	0	0	0	0	0	1.58896	0	1.58896	1.58896	0	0	0	0	0	0	0	1.58896	3.19425	0	1.58896	0	0	0	0	0	2.17444	1.58896	0
524	CTCTGGTGTGTCATGT.1_1	shNC	0	0	0	1.90181	0	2.51737	0	0	0	0	0	0	0	0	0	0	0	0	0	0	0	0	0	0	1.90181	0	0	0	0	0	1.90181	0	0	0	1.90181	0	2.89558	0	0	0	0	0	0	0	0	0	0
525	CTGAATGAGTGTGTTC.1_1	shNC	0	0	0	0	0	0	0	0	0	0	0	0	0	0	0	0	0	0	0	0	0	0	0	0	0	0	0	2.66383	0	0	0	0	0	0	0	2.66383	0	0	0	0	0	0	2.66383	0	0	0	0
526	CTGAATGGTGCAACAG.1_1	shNC	0	1.5267	1.03015	1.5267	0	1.5267	0	0	0	0	0	0	0	0	0	0	0	0	1.03015	0	1.03015	0	1.03015	0	2.30332	0	1.5267	1.5267	0	0	0	0	1.5267	0	0	1.03015	2.46885	0	1.5267	0	0	0	0	1.03015	0	1.5267	0
527	CTGAATGTCTTTGATC.1_1	shNC	0.326763	0.76984	0.76984	0.572643	0	0.572643	0	0	0.572643	0	0.572643	0.572643	0.326763	0.326763	0	0	0	0.934482	0.76984	0	0.326763	0	0.572643	0	1.65846	0	0.76984	0.572643	0	0	0.326763	0	0	0.572643	0.76984	1.07581	0.326763	0	0.76984	0	0	0	0.326763	0	0.76984	0.326763	0.326763
529	CTGAGGCAGCTCACTA.1_1	shNC	0	0	0	1.91083	0	0	0	0	0	0	0	1.35567	0	0	0	1.35567	0	0	3.48655	0	0	0	0	0	1.91083	0	1.91083	0	0	0	0	0	0	0	0	1.91083	0	0	0	0	0	0	0	0	1.35567	0	0
530	CTGAGGCAGGTACAGC.1_1	shNC	0	0	0	0	1.3951	1.95596	0	0	2.31314	0	0	0	0	0	0	0	0	0	1.3951	0	0	0	0	0	0.923338	0.923338	0.923338	0	0	0.923338	0	0	0	0	0	0	0	0	0	0	0	0	0	0.923338	0	0	0
531	CTGAGGCGTTAGGACG.1_1	shNC	0.591527	0.338878	0	0.338878	0	1.44149	0.338878	0	0	0	1.34119	0.338878	0	0	0.338878	0	0	0.960686	0	0	0.338878	0	0.338878	0	0	0	0.793045	0	0.338878	0.338878	0	0	0	0	0.591527	0.793045	0.960686	0	0.338878	0	0	0	0	0.591527	1.10422	0.793045	0
532	CTGATCCCACGTCATA.1_1	shNC	0	0	0	0	0	0	0	0	0	0	0	0	2.16928	0	0	0	0	0	0	0	0	0	0	0	0	0	0	2.16928	0	0	2.16928	0	0	0	0	2.16928	3.18866	0	0	0	0	0	0	0	2.16928	2.16928	0
533	CTGCATCAGAACTGAT.1_1	shNC	0	0	0	0.764402	0	0.453528	0	0	0.764402	0	0	1.19253	0	0	0	0	0	1.00121	0.453528	0	0	0	0	0	0.453528	0	0.453528	0.453528	0.764402	0	0.453528	0	0.453528	0	0	1.19253	0.764402	0	0	0	0	0	0	0	0	0	0
535	CTGCATCTCACACCCT.1_1	shNC	1.87937	0	0	2.4931	0	0	0	0	0	0	0	0	0	0	0	0	0	0	2.4931	0	0	0	0	0	2.4931	0	0	1.87937	0	0	1.87937	0	0	0	0	0	0	0	0	0	0	0	0	0	0	0	0
537	CTGCCATCAGGCATTT.1_1	shNC	0	0	0	1.32852	0	0	0	0	0	0	0	0	0	0	0.870344	0	0	0	2.69984	0	0	0	0	0	0.870344	0	0.870344	0.870344	0	0	0	0	1.64156	0	0	0	1.64156	0	1.32852	0	0	0	0	0	0	0.870344	0
539	CTGCCTAAGAGTCAAT.1_1	shNC	0	0	0	0	0	1.75442	0	0	0	0	0	0	0	0	0	0	0	0	3.21489	0	0	0	0	0	1.75442	0	0	1.75442	0	0	0	0	0	0	0	0	0	0	1.75442	0	0	0	1.75442	0	0	0	0
540	CTGCCTAGTATCGAGG.1_1	shNC	0.457029	0	0.457029	0	0.457029	2.20951	0.457029	0	1.19921	0	0	0.769529	0	0	0	0	0	0	1.916	0	1.00727	0	0	0.457029	2.7017	0.457029	1.00727	1.00727	0.457029	0	0	0	0	0.769529	0.457029	0.457029	0	0	0	0	0	0	0.457029	0	1.36017	0.457029	0
541	CTGCGAGAGGACTATA.1_1	shNC	0	0	0	1.56519	0	0	0	0	0	0	0	0	0	0	0	0	0	0	2.51372	0	0	0	0	0	0	0	1.56519	1.56519	0	0	0	0	0	0	0	0	0	0	1.56519	0	0	0	0	1.56519	0	0	0
542	CTGCGAGAGTAAACAC.1_1	shNC	0	0	0	1.32852	1.32852	0	0	0	0	0	0	1.32852	0	0	0	0	0	0	2.23285	0	0	0	0	0	1.32852	0	0	0	0	1.32852	0	0	0	0	0	0	1.32852	0	0	0	0	0	0	0	0	1.32852	0
546	CTGGACGAGTCACGCC.1_1	shNC	1.58409	0	0	0.677379	0	1.36255	0	0	0	0.677379	0	0	0	0	0	0	0	0	2.05168	0	0.677379	0	0	0	1.76534	0	1.36255	1.07753	0.677379	0	0	0	1.07753	0.677379	0.677379	1.07753	0	0	0.677379	0	0	0	0	0	1.07753	0.677379	0
550	CTGTAGAAGGTACAGC.1_1	shNC	0	0	0	0	0	0	0	0	0	0	1.89578	0	0	0	1.34257	0	0	0	2.24988	0	0	0	0	0	1.34257	0	1.34257	1.34257	0	0	0	0	0	0	0	0	1.89578	0	1.34257	0	0	0	0	0	1.34257	1.34257	0
552	CTGTATTGTATCAGCT.1_1	shNC	0	0	0	2.7628	0	0	0	0	0	0	0	0	0	0	0	0	0	0	2.3884	0	0	0	0	0	0	0	0	0	0	0	0	0	0	0	0	0	1.78306	0	0	0	0	0	0	0	0	0	0
553	CTGTATTTCTCCTGCA.1_1	shNC	0.479925	0.479925	0.479925	0	0	0.802856	0	0	0.479925	0	0.802856	0.802856	0	0	0	0	0.479925	1.04657	1.04657	0	0.479925	0.479925	0	0	1.87848	0	1.40604	0	0	0	0.802856	0	0	0.479925	0.802856	0.802856	1.96844	0	0	0	0	0	0	0.479925	1.66991	0	0
554	CTGTCGTGTCTTACTT.1_1	shNC	0	0	0	0	0	0	0	0	0	0	0	0	0	0	0	0	0	0	2.30837	0	0	0	0	0	1.71	1.71	0	1.71	0	0	1.71	0	0	0	0	0	2.68013	0	1.71	0	0	0	0	0	0	0	0
555	CTGTGAATCGATGCTA.1_1	shNC	0	0	0	1.5548	0	2.13633	0	0	0	0	0	0	0	0	0	0	0	0	0	0	0	0	0	0	0	0	0	0	0	0	2.13633	0	0	0	0	0	1.5548	0	0	0	0	0	0	0	1.5548	2.13633	0
556	CTGTGGGGTAGGAAAG.1_1	shNC	0	0	0	0	0	0	0	0	0	0	0	0	0	0	0	0	0	0	1.79051	0	0	0	0	0	1.79051	0	0	0	0	0	0	0	0	0	0	0	0	0	0	0	0	0	0	0	0	0	0
557	CTTAGGACAACTTGCA.1_1	shNC	1.29254	0	0	1.29254	0	0	0	0	0	0	0	1.29254	0	0	0	0	0	0	0	0	0	0	0	0	2.18897	0	0	0	0	0	0	0	1.29254	0	1.29254	1.29254	2.18897	0	0	0	0	0	0	0	2.18897	0	1.29254
558	CTTCAATTCATTCATC.1_1	shNC	0	0	0	1.94266	0	0	0	0	0	0	0	0	0	0	1.38345	0	0	0	0	0	0	1.38345	0	0	0	0	1.94266	1.38345	0	0	0	0	0	1.38345	1.38345	0	2.29917	0	0	0	0	0	1.38345	0	1.94266	0	0
559	CTTCCGACAGCTGAAG.1_1	shNC	0	0	0	0	0	0	0	0	0	0	0	0	0	0	0	0	0	0	2.2805	0	0	0	0	0	1.16171	0	1.16171	0	0	0	0	0	0	0	0	0	2.02633	0	0	1.16171	0	0	1.16171	0	0	0	0
561	CTTCGGTCAGGATTCT.1_1	shNC	0	1.33619	0.660025	0	0	1.0542	0	0	1.0542	0	0	0	0	0	0	0	0	0	2.02074	0	0	0	0	0	2.24215	0	0.660025	1.73593	1.0542	0	0	0	0	0	0.660025	0.660025	2.02074	0	0	0	0	0	0	0	1.73593	0.660025	0
562	CTTGAGAAGCACCCAC.1_1	shNC	0.866171	0	0	0.866171	0	0	0	0	0.866171	0	0	0.866171	0	0	0	0	0	0	0	0	0	0	0	0	0	0	1.63576	0	0	0	0	0	0	0	0	0.866171	0	0	0	0.866171	0	0	0	0	0	0	0
563	CTTGATTGTCTTAGTG.1_1	shNC	0	0	0	2.22582	0	0	0	0	0	0	0	0	0	0	0	0	0	0	1.63521	0	0	0	1.63521	0	0	0	2.59463	0	0	0	1.63521	0	0	0	0	1.63521	2.22582	0	0	0	0	0	0	0	0	1.63521	0
564	CTTTCAAAGCCTCGTG.1_1	shNC	0.640837	0	0	0	0	1.52438	0	0	0	0	0	0	0	0	0.640837	0	0	0	1.52438	0	0.640837	0	0	0	0	0.640837	0.640837	1.02824	0.640837	0	0	0	0	0	0	1.30677	0.640837	0	0	0	0	0	0	0	1.02824	0	0
568	CTTTCAATCTGTGTGA.1_1	shNC	0	0	0	0	0	0.950323	0	0	0.584042	0	0	0.584042	0	0	0	0.584042	0	0	1.75087	0	0.584042	0	0.584042	0	2.49369	0	1.21782	1.42866	0.584042	0	1.21782	0	0	0	0	0.950323	0.584042	0	0	0	0	0	0	0	0.584042	0	0
569	CTTTCGGCAAATACAG.1_1	shNC	0	1.31501	0	1.86402	0	0	0	0	0	0	0	0	0	0	0	0	0	0	0	0	0	0	0	0	2.21642	0	0	0	0	0	1.31501	0	0	0	0	2.47647	2.9994	0	0	0	0	0	0	0	0	0	0
571	CTTTCGGTCACAACCA.1_1	shNC	0	0	0	0	0	1.82677	0	0	0	0	0	0	0	0	0	0	0	0	0	0	0	0	0	0	0	0	1.82677	0	0	0	0	0	0	0	0	0	1.82677	0	0	0	0	0	1.82677	0	1.82677	1.82677	0
573	GAACACTAGACCTTTG.1_1	shNC	1.94351	1.09675	0	1.09675	0	1.6072	0	0	0	0	0	0	1.09675	0	0	0	0	0	1.6072	0	0	1.09675	0	0	1.09675	0	1.09675	0	0	0	0	0	0	0	1.09675	0	1.6072	0	0	0	0	0	0	0	1.09675	0	0
575	GAACACTTCCCGGTAG.1_1	shNC	0.625544	0	1.00742	0	0	1.49896	0	0	1.67641	1.2831	0	0.625544	0	0	0	0	0	0	1.49896	0	1.00742	0	0	0	0.625544	0	1.00742	1.2831	1.00742	0	0	0	0	0	0	0.625544	0.625544	0	0.625544	0	0	0	0	0	1.49896	0.625544	0
578	GAAGCCCCAGCTGTGC.1_1	shNC	0	0	0	0	0	0.710513	0	0	0.710513	0	0.417076	0.417076	0	0	0	0.417076	0	1.1217	0.937094	0	0	0	0.417076	0	1.1217	0	0.937094	0	0	0	0.710513	0	0	0	0	1.1217	1.1217	0	0.417076	0	0	0	0.417076	0	1.27748	0.417076	0
580	GAAGCCCTCTGATGGT.1_1	shNC	0	0	0	1.8272	0	0	0	0	0	0	0	0	0	0	1.8272	0	0	0	0	0	0	0	1.8272	0	1.8272	0	0	0	0	0	0	0	0	0	1.8272	1.8272	1.8272	0	0	0	0	0	0	1.8272	0	0	0
581	GAAGCGAAGGCACTAG.1_1	shNC	0.311313	0	0.311313	0	0	1.81042	0	0	0.311313	0	0.739864	0.548372	0	0	0	0	0	0.548372	0.311313	0	0.311313	0	0	0	0.548372	0	0.311313	0.311313	0	0	0	0	0	0	0.739864	0.311313	1.03889	0	0.311313	0	0	0	0	0	1.36653	0	0
584	GAAGTAACATCGTTCC.1_1	shNC	0.58736	0	1.2231	1.2231	0	1.43435	0	0	1.43435	0	0	0.954921	0.58736	0	0.58736	0	0	0	2.50056	0	0.58736	0	0.58736	0	1.88626	0.954921	0.954921	1.2231	0.954921	0.58736	0.954921	0	0	0.58736	0	0.954921	0.954921	0	1.43435	0	0	0	1.43435	0	1.2231	0	0
585	GAAGTAAGTCGCATGC.1_1	shNC	0	0	0	0	0	0	0	0	0	0	0	0	0	0	0	0	0	0	0	0	0	0	0	0	1.81076	0	0	0	0	0	0	0	0	0	0	1.81076	0	0	0	0	0	0	0	1.81076	2.79394	0	0
586	GAATCACTCGATGGAG.1_1	shNC	0	0	1.75879	0	0	0	0	0	0	0	0	0	0	0	0	0	0	0	2.36187	0	0	0	0	0	0	0	0	0	0	0	0	0	0	0	0	1.75879	2.36187	0	0	0	0	0	0	0	0	0	0
589	GACAGCCCAGAGAATT.1_1	shNC	1.07734	0	0	0	0	1.07734	0	0	0	0	0	0	0	0	0	0	0	0	1.07734	0	0	0	0	1.07734	0	0	1.58386	0	0	0	1.07734	0	0	0	0	0	1.07734	0	0	0	0	0	1.07734	1.07734	0	0	0
590	GACAGCCCATAGGAGC.1_1	shNC	1.34866	0	0	1.34866	0	0	0	0	0	0	0	0	0	0	0	0	0	0	2.25725	0	0	0	0	0	1.90278	0	1.90278	0	0	0	1.34866	0	0	0	0	1.34866	0	0	0	0	0	0	0	0	1.34866	1.90278	0
591	GACCAATCATACCATG.1_1	shNC	0	1.35205	0	0	0	1.35205	0	0	0	0	0	0	0	0	0	0	0	0	0	0	0	0	0	0	1.35205	0	0	2.26135	0	0	0	0	1.35205	0	1.35205	1.35205	0	0	0	0	0	0	0	0	2.52263	1.35205	0
592	GACCAATGTATAATGG.1_1	shNC	0	0	0	1.82852	0	0	0	0	0	0	0	0	0	0	0	0	0	0	2.43793	0	0	0	0	0	1.28435	0	1.28435	1.28435	0	0	1.28435	0	0	0	0	0	1.28435	0	0	0	0	0	0	1.28435	0	0	0
598	GACCCTTCATTCTGTT.1_1	shNC	0	1.20967	0	2.34272	0	0	0	0	0	0	0	1.20967	0	0	0	0	0	0	2.08656	0	0	0	0	0	0	0	0	1.20967	0	0	0	0	0	0	1.20967	0	2.08656	0	1.20967	0	0	0	0	0	0	0	0
601	GACCGTGCATGGAAGC.1_1	shNC	0	0	0	0	0	0	0	0	1.3562	0	0	0.892291	0	0	0	0	0	0	0	0	0	0	0	0	1.91145	0.892291	0	0.892291	0.892291	0.892291	0	0	0	1.3562	0	0	0	0	0.892291	0	0	0	0	0	0.892291	0	0
603	GACGTTAAGTCACGAG.1_1	shNC	0.696716	0	0.696716	0	0	1.61514	0	0	0	0	0	0.696716	0	0	0	0	0	0	1.61514	0	0	0	0	0	1.61514	1.39164	1.39164	2.08568	0	0.696716	0.696716	0	0.696716	0.696716	1.10337	1.10337	1.39164	0	0.696716	0	0	0	0	0.696716	1.10337	0.696716	0
605	GACGTTAGTGTCCAAT.1_1	shNC	0	0	0	0	0	1.62041	0	0	0	0	0	2.20941	0	0	0	0	0	0	0	0	0	0	0	0	0	0	0	0	0	0	0	0	2.20941	0	0	0	1.62041	0	1.62041	0	0	0	0	0	0	0	0
606	GACTCAAGTAGTTCCA.1_1	shNC	0	1.21058	0	0.778277	0	2.45096	0	0	1.21058	0	0	0.778277	0.778277	0	0	0	0	0	1.92987	0	0.778277	0	0	0	0.778277	0.778277	1.21058	0.778277	0.778277	1.21058	0	0	1.21058	0.778277	0.778277	1.21058	0.778277	0	0	0	0	0	0	0	0.778277	0	0
608	GACTGATAGAACTCCT.1_1	shNC	0	2.08997	0	2.08997	0	0	0	0	0	0	0	1.51344	0	0	1.51344	0	0	0	2.92915	0	0	0	0	0	0	0	0	1.51344	0	0	0	0	0	1.51344	0	1.51344	1.51344	0	1.51344	0	0	0	0	0	2.71928	1.51344	0
611	GAGAAATGTGTCTTAG.1_1	shNC	0	0	0	0	0	0	0	0	0	0	0	0	0	0	0	0	0	1.28284	1.28284	0	0	0	0	0	0	1.28284	0	1.28284	0	0	0	1.28284	0	0	0	1.28284	0	0	0	0	1.28284	0	1.28284	0	0	0	1.28284
612	GAGACCCCAATAGTAG.1_1	shNC	0	0	0	2.01039	0	0	0	0	0	0	0	0	0	0	0	0	0	0	2.37018	0	0	0	0	0	0	0	0	0	0	0	0	0	0	0	0	1.44294	0	0	0	0	0	0	0	0	1.44294	0	0
615	GAGAGGTCATGTGTCA.1_1	shNC	1.59191	0	1.08403	0	0	0	0	0	0	0	0	0	0	0	1.08403	0	0	0	2.5447	0	0	0	0	0	0	0	0	1.08403	0	0	2.5447	0	0	0	1.08403	1.08403	1.08403	0	1.08403	1.08403	0	0	0	0	1.08403	0	0
616	GAGATGGCATTATGCG.1_1	shNC	0	0	0	1.71559	0	0	0	0	0	0	0	0	0	0	0	0	0	0	2.83085	0	0	0	0	0	0	0	1.71559	2.05923	0	0	2.31451	0	1.18784	0	0	0	0	0	0	0	0	0	1.18784	1.18784	0	0	0
619	GAGGCCTTCATTGCGA.1_1	shNC	0	0	0	1.27406	0	0	0	0	0	0	0	0	0	0	1.27406	0	0	0	1.81656	0	0	0	0	0	0	0	0	1.27406	0	0	0	0	0	0	1.27406	0	1.27406	0	0	0	0	0	0	0	0	0	0
620	GAGGGATAGCGTTGTT.1_1	shNC	0	0	0	0	0	1.81333	0	0	0	0	0	1.81333	0	0	0	1.27128	0	0	2.79682	0	0	0	0	0	1.81333	0	0	0	0	0	0	0	0	0	0	1.81333	2.62663	0	0	0	0	0	0	0	2.16289	0	0
621	GAGGGATCAGGCAATG.1_1	shNC	0	0	0	1.21066	0	0	0	0	0	0	0	0	1.21066	0	0	0	0	0	2.54777	0	0	0	0	0	1.74247	0	1.74247	1.74247	0	0	1.21066	0	0	0	0	0	2.344	0	0	0	0	0	0	0	2.344	1.21066	0
623	GAGGGATTCGAGAGAC.1_1	shNC	0	0.850741	0	0	0	0	0	0	0	0	0	1.30366	0	0	0	0	0	0	0	0	0	0	0	0	0	0	1.8509	0	0	0	1.30366	0	0	0	0	0	2.04212	0	0.850741	0	0	0	0	0	0	0	0
624	GAGGGTAAGAGCTGAC.1_1	shNC	0	0	0	0	0	1.44864	0	0	0	0	0	0	0	0	1.44864	0	0	0	0	0	0	0	0	0	0	0	0	2.01686	0	0	0	0	1.44864	0	0	1.44864	2.01686	0	0	0	0	0	0	0	0	0	0
625	GAGGGTACAGACCAGA.1_1	shNC	0	0	0	0	0	0	0	0	0	0	0	0	0	0	0	0	0	0	1.82764	0	0	0	0	0	0	0	0	0	0	0	0	0	0	0	1.82764	0	0	0	1.82764	0	0	0	0	0	0	0	0
627	GAGTCATCATGAGTAA.1_1	shNC	1.40884	0	0	1.40884	0	1.97163	0	0	0	0	0	0	0	0	0	0	0	0	1.40884	0	0	0	0	0	1.40884	0	0	0	0	0	0	0	1.40884	0	0	1.40884	1.40884	0	0	0	0	0	0	0	1.40884	0	0
628	GAGTCATGTGACACAG.1_1	shNC	0	0	0	0	0	0	0	0	0	0	0	1.34424	0	0	0	0	0	0	1.8977	0	0	0	0	0	1.34424	1.34424	0	1.8977	0	0	1.34424	0	0	0	0	0	1.34424	0	1.8977	0	0	0	1.34424	0	1.34424	0	0
630	GAGTCTAGTAGGACCA.1_1	shNC	0	0	0	0	0	1.1876	0	0	0	0	0	0	0	0	0	0	0	0	1.71531	0	0	0	0	0	1.48587	0	0.760619	0.760619	0.760619	0	0	0	0.760619	0.760619	0.760619	0	0.760619	0	0	0	0	0	0	0	0	0.760619	0
631	GAGTCTAGTCATATGC.1_1	shNC	0	0	0	0	0	1.75363	0	0	0	0	0	0	0	0	0	0	0	0	0	0	0	0	0	0	0	0	1.75363	0	0	0	1.75363	0	0	0	0	0	0	0	0	0	0	0	0	0	0	0	0
632	GAGTGAGGTAACATGA.1_1	shNC	0.936764	0	0.574282	0.574282	0	1.20224	0.574282	0	0.574282	0	0	0	0	0	0	0	0	0	0.574282	0	0.936764	0	0.936764	0	1.20224	0	0.936764	0	0.936764	0.936764	0	0	0	0	0	0	0.936764	0	0.936764	0	0	0	0	0	0	0.574282	0
633	GAGTTACCACCCTATC.1_1	shNC	0	0	0	0	0	0	0	0	0	0	0	0	0	0	2.19332	0	0	0	2.19332	0	0	0	0	0	1.60593	0	1.60593	0	0	0	0	0	0	1.60593	0	0	0	0	0	0	0	0	0	1.60593	0	0	0
634	GAGTTACTCGGACGTC.1_1	shNC	0	0.577898	0	0	0	2.4809	0	0	0.941794	0	1.59157	1.98215	0	0.577898	0.577898	0.577898	0	0.577898	1.20802	0	0	0	0	0	1.98215	0	0.577898	0.577898	0	0.577898	0.577898	0	0	0.941794	0	0.941794	1.20802	0	0.577898	0.941794	0	0	0	0	0	0	0
638	GATAGAATCACAAGGG.1_1	shNC	0	1.84403	0	1.84403	0	0	0	0	0	0	0	0	0	0	0	0	0	0	0	0	0	0	0	0	1.84403	0	1.84403	1.84403	0	0	0	0	0	0	1.84403	0	3.49444	0	1.84403	0	0	0	0	0	1.84403	0	0
639	GATAGCTAGGGCAATC.1_1	shNC	1.95453	0	0	1.95453	0	0	0	0	0	0	0	0	0	0	0	0	0	0	0	0	0	0	0	0	2.57423	0	1.95453	0	0	0	1.95453	0	0	1.95453	0	0	0	0	0	0	0	0	0	0	0	0	0
640	GATCACAAGGGTCACA.1_1	shNC	1.31243	0	0	0	0	1.31243	0	0	1.31243	0	0	0	0	0	0	0	0	0	1.31243	0	0	0	0	0	1.31243	1.31243	1.86103	1.31243	0	0	1.31243	0	0	0	0	0	2.21327	0	0	0	0	0	0	0	0	0	0
642	GATCCCTAGACCCGCT.1_1	shNC	0	0	0	0	0	0	0	0	0	0	1.34697	0	0	0	0	0	0	0	1.34697	0	0	0	0	0	0	0	0	1.90084	0	0	0	0	0	0	1.34697	0	3.28136	0	1.34697	0	0	0	0	0	1.34697	0	0
643	GATCCCTCAGTTTCAG.1_1	shNC	0	0	0	0	0	0	0	0	0	0	0	0	0	0	0	0	0	0	1.72728	0	0	0	0	0	1.72728	0	0	0	0	0	0	0	0	0	0	0	1.72728	0	0	0	0	0	0	0	1.72728	0	0
645	GATGAGGGTGTGCCTG.1_1	shNC	0	1.7761	0	0	0	0	0	0	0	0	0	0	0	0	0	0	0	0	2.3808	0	0	0	0	0	1.7761	0	0	0	0	0	1.7761	0	0	0	0	2.3808	0	0	0	0	0	0	0	0	0	0	0
646	GATGGAGTCCTCACCA.1_1	shNC	0	0	0	1.31282	0	1.31282	0	0	0	0	0	0	0	0	0	0	0	0	2.21375	0	0	0	1.31282	0	0	0	0	0	0	0	1.31282	0	0	0	0	0	1.86149	0	1.31282	0	0	0	0	0	0	0	1.31282
647	GATGTTGCATCACAGT.1_1	shNC	0	0	0	1.11158	0	0	0	0	0	0	0	0	2.21448	0	0	0	1.11158	0	0	0	0	0	0	0	1.62498	0	1.11158	1.62498	0	0	0	0	1.11158	0	0	1.11158	2.58286	0	0	0	0	0	0	1.11158	1.96255	0	0
648	GATTCGAGTTCTCTAT.1_1	shNC	0	0	0	1.56729	0	2.51615	0	0	0	0	0	0	0	0	0	0	0	0	2.51615	0	0	0	0	0	1.56729	0	0	0	0	0	0	0	0	0	0	0	0	0	0	0	0	0	0	0	0	0	0
651	GATTCGATCTTCTCAA.1_1	shNC	0	0	0	0.346454	0	0.603271	0	0	0.346454	0	1.46148	0.976888	0	0	0.346454	0	0	0.603271	0.603271	0	0	0	0	0	0.807428	0	1.36054	0	0.346454	0	0.603271	0	0.346454	0	0	0.807428	1.55316	0	0.346454	0	0	0	0.346454	0.976888	1.24826	0.346454	0
652	GATTCTTTCCTTGACC.1_1	shNC	0	1.97367	1.12027	0	0	2.226	0	0	0	0	0	1.12027	0	0	0	0	0	0	1.12027	0	1.12027	0	0	0	1.63537	1.12027	1.12027	1.63537	0	1.63537	0	0	0	1.12027	1.12027	1.12027	0	0	0	0	0	0	0	0	0	0	0
654	GATTTCTGTAACAAGT.1_1	shNC	0	0	1.84224	2.45284	0	0	0	0	0	0	0	0	0	0	0	0	0	0	0	0	0	0	0	0	0	0	0	0	0	0	0	0	0	0	0	0	0	0	0	0	0	0	0	0	0	0	0
655	GCAACATGTTCCGCAG.1_1	shNC	0	0	0	2.07826	0	0	0	0	1.50303	0	0	0	0	0	0	0	0	0	0	0	1.50303	0	0	0	2.07826	0	1.50303	1.50303	0	0	0	0	0	0	0	1.50303	0	0	0	0	0	0	0	0	0	0	1.50303
656	GCAACCGGTGAGACCA.1_1	shNC	0	0	0	1.68273	0	0	0	0	0	0	0	0	0	0	0	0	0	0	2.64905	0	0	0	0	0	0	0	0	1.68273	0	0	0	0	1.68273	0	0	0	0	0	2.27833	0	0	0	0	0	2.27833	0	0
657	GCAACCGTCGCATTGA.1_1	shNC	0.672365	1.07081	0.672365	0	0	1.57598	0	0	1.35496	0	0	0.672365	0	0	0	0	0.672365	0	2.44647	0	0	0	0	0	2.04278	0.672365	1.35496	1.07081	0.672365	0	0.672365	0	0	0	0	0.672365	1.07081	0	1.07081	0	0	0	1.07081	1.07081	2.04278	1.35496	0
664	GCATGATAGCGGTAAC.1_1	shNC	2.03457	0	0	2.03457	0	0	0	0	0	0	0	0	0	0	0	0	0	0	2.66011	0	0	0	0	0	0	0	0	2.03457	0	0	0	0	0	0	0	2.03457	0	0	0	0	0	0	0	0	0	0	0
668	GCCAACGTCTTACACT.1_1	shNC	0	0	0	2.17341	0	1.58803	0	0	0	0	0	0	0	0	0	0	0	0	2.5402	0	0	0	0	0	2.80798	0	0	1.58803	0	0	0	0	1.58803	0	0	1.58803	2.80798	0	0	0	0	0	0	0	1.58803	0	0
669	GCCAGCATCGCATGAT.1_1	shNC	0	0	0	0	0	0	0	0	0	0	0	0	0	0	0	0	0	0	1.71934	0	0	0	0	0	1.71934	0	0	0	0	0	0	0	0	1.71934	0	0	0	0	0	0	0	0	0	0	0	1.71934	0
670	GCCAGGTAGCAATAAC.1_1	shNC	0	0	0	2.7561	0	2.12456	0	0	0	0	0	0	0	0	0	0	0	0	2.12456	0	0	0	0	0	2.7561	0	2.7561	0	0	0	2.12456	0	2.12456	2.12456	0	0	0	0	0	0	0	0	2.12456	2.12456	0	0	0
671	GCCAGGTCAGATACTC.1_1	shNC	0.51475	0.51475	0.51475	0.51475	0	0.51475	0	0	1.30641	0	1.30641	1.61727	0	0	0	0	0.51475	0	0	0	0	0	0	0	1.10514	0	1.10514	0.51475	0.51475	0	1.10514	0	0.51475	0.51475	0.51475	0.51475	1.10514	0	0	0	0	0	0	0	1.10514	0.852899	0
673	GCCAGTGGTATTAAGG.1_1	shNC	2.10249	0	0	0	0	2.10249	0	0	0	0	0	0	0	0	0	0	0	0	0	0	0	0	0	0	0	0	0	0	0	0	0	0	0	0	0	1.52459	2.73261	0	0	0	0	0	0	0	1.52459	1.52459	0
676	GCCCAGAAGACCAACG.1_1	shNC	0	1.12834	0	0	0.715525	1.98397	0	0	2.23667	0	0	0.715525	0	0	0	0	0.715525	0	0.715525	0	1.12834	0	0.715525	0	1.64501	1.12834	0	1.64501	0.715525	0.715525	0	0	0	0.715525	0	1.12834	1.64501	0	0.715525	0	0	0	0	0	1.12834	0	0
678	GCCGATGTCGATCCCT.1_1	shNC	1.79699	0	0	0	0	0	0	0	0	0	0	0	0	0	0	0	0	0	1.79699	0	0	0	0	0	1.79699	0	1.79699	0	0	0	0	0	1.25725	0	0	1.25725	1.25725	0	1.25725	0	0	0	1.25725	0	0	0	0
680	GCGAGAACACTGTGTA.1_1	shNC	0	1.7572	0	0	0	0	0	0	0	0	0	0	0	0	0	0	0	0	3.00492	0	0	0	0	0	1.7572	0	0	0	0	0	0	0	0	0	0	0	2.36013	0	0	0	0	0	0	0	1.7572	0	0
683	GCGTTTCAGCGAATGC.1_1	shNC	0	0.690408	0	1.09496	0	0.690408	1.09496	0	0	0	0	0	0	0	0	0	0	0	1.78719	0	1.09496	0	0	0	1.94121	0	0.690408	0	0	0.690408	0	0	0.690408	0.690408	0	1.09496	1.78719	0	0	0	0	0	0	0	1.09496	0	0
684	GCGTTTCCAAACTCTG.1_1	shNC	0.961359	0	0	1.44232	0	0	0	0	0	0	0.961359	0	0.961359	0	0.961359	0	0	0	1.44232	0	0	0	0	0	0.961359	0	2.00969	0	0	0	0.961359	0	0	0.961359	0	0.961359	0	0	0	0	0	0	0	0	0	0	0
689	GCTGAATAGGTACAGC.1_1	shNC	0	0.441416	0.441416	0.980101	0	0	0	0	0.746601	0	0.746601	0.746601	0	0	0	0	0.441416	0.441416	0.746601	0	0	0	0	0	1.16927	0	0	0.441416	0	0	0.441416	0	0	0	0.980101	0.441416	0.441416	0	0.441416	0.441416	0	0	0	0	1.46544	0	0
692	GCTGGGTTCGAAGCCC.1_1	shNC	0	0	0	0	0	0.626922	0	0	1.0093	0	2.51235	1.0093	0	0	0	0	0	0.626922	1.28524	0	0	0.626922	0	1.0093	0.626922	0	0	0.626922	0.626922	0	1.50126	0	0	0	1.50126	1.0093	0	0	0.626922	0	0	0	0	0	2.51235	0	0
694	GCTTTCGTCTCTCAAT.1_1	shNC	0	1.38345	0	0	0	0	0	0	0	0	0	1.38345	0	0	0	0	0	0	1.94266	0	0	0	0	0	0	0	0	0	0	0	1.38345	0	0	0	0	0	0	0	1.38345	0	0	0	0	0	1.38345	0	0
696	GGAAGTGGTGGATGAC.1_1	shNC	0	0	0	0	0	1.57302	0	0	0	0	0	0	1.57302	0	0	0	0	0	0	0	0	0	0	0	1.57302	0	0	2.15667	0	0	2.15667	0	0	0	1.57302	2.15667	0	0	2.15667	0	0	0	0	0	2.15667	0	0
697	GGAAGTGTCACACGAT.1_1	shNC	0	0	0	1.4733	0	0	0	0	1.4733	0	0	2.40612	0	0	0	0	0	0	2.88021	0	0	0	0	0	1.4733	0	2.40612	0	0	0	2.04475	0	2.04475	0	1.4733	0	2.88021	0	0	1.4733	0	0	0	0	1.4733	1.4733	0
698	GGAAGTGTCAGCGGAA.1_1	shNC	0.604964	0	0	0	0	1.64015	0.604964	0	0	0	0	0.604964	0	0	0	0	0	0	0.979218	0	0.979218	0	0	0	1.91961	0.604964	0.979218	1.25092	0	0.604964	0.604964	0	0.604964	0	0	1.25092	0.979218	0	0.979218	0	0	0	0.604964	0	1.46435	0.604964	0
699	GGAATGGCAGGACGAT.1_1	shNC	0	0	0	0	0	0	0	0	0	0	0	0	0	0	0	0	0	0	3.0187	0	0	0	0	0	0	0	0	0	0	0	0	0	1.7692	0	0	1.7692	0	0	0	0	0	0	0	0	0	0	0
701	GGAATGGGTCGCTCGA.1_1	shNC	0	0	0	1.67176	0	0	0	0	1.67176	0	0	1.67176	0	0	0	0	0	0	2.26624	0	0	0	0	0	0	1.67176	1.67176	1.67176	0	0	0	0	0	0	0	0	2.63652	0	0	0	0	0	0	0	2.26624	0	0
704	GGAGATGAGTAGACCG.1_1	shNC	0	0	0	0	0	0	0	0	1.46034	0	0	0	0	0	0	0	0	0.97596	1.78526	0	0	0	0	0	0	0	0.97596	0	0	0	0	0	0	0	0	0	0.97596	0	0	0	0	0	0.97596	0	0.97596	0	0
707	GGAGGTATCGAAGTGG.1_1	shNC	0	0	0	0	0	0	0	0	0	0	0	0	0	0	0	0	0	0	1.65512	0	0	0	0	0	1.65512	0	1.65512	1.65512	0	0	0	0	0	0	0	0	2.24785	0	0	0	0	0	1.65512	0	0	0	0
711	GGCACGTAGTCGGGAT.1_1	shNC	1.1232	0	0	0	0	0	0	0	1.1232	0	0	0	0	0	0	0	0	0	1.63888	0	0	0	0	0	2.22988	0	0	0	0	0	0	0	0	0	0	0	1.63888	0	0	0	0	0	0	0	0	1.1232	0
712	GGCACGTCACTGGCCA.1_1	shNC	1.22559	0	0	2.10639	0	0	0	0	0	0	0	0	0	0	0	0	0	0	1.22559	0	0	0	0	0	0	0	1.22559	0	0	0	1.22559	0	0	0	1.22559	1.22559	3.1204	0	0	0	0	0	0	1.22559	2.10639	1.22559	0
715	GGCGTCACAGGTCAAG.1_1	shNC	0	0	0	1.25869	0	0	0	0	0	0	0	0	0	0	0	0	0	1.25869	2.40543	0	0	0	0	0	1.25869	1.25869	1.79867	0	0	0	1.25869	0	1.25869	0	0	0	0	0	0	0	0	0	0	1.25869	1.25869	0	0
717	GGCTGTGTCATATGGC.1_1	shNC	0	0	0	0	0	0	0	0	0	0	0	0	0	0	0	0	0	0	0	0	0	0	0	0	3.01455	0	0	0	0	0	0	0	0	3.01455	0	0	0	0	0	0	0	0	0	0	3.01455	0	0
719	GGCTTTCGTCCTACGG.1_1	shNC	0	0	0	1.43265	0	1.43265	0	0	0	0	0	1.43265	0	0	1.43265	0	0	0	1.43265	0	0	0	0	0	1.43265	0	1.43265	0	0	0	0	0	0	0	0	0	0	0	0	0	0	0	0	0	1.43265	0	0
721	GGGACCTCACATACTG.1_1	shNC	0.51948	0.859638	0.859638	0.51948	0	1.31496	1.48291	0	0.51948	0	0	0	0	0	0	0	0	0.51948	1.96436	0	0.51948	0	0	0	2.28798	0	1.31496	1.11299	0.51948	0.51948	0.859638	0	1.11299	0	0.51948	0.859638	0.859638	0	0	0	0	0	0	0.859638	1.48291	0	0
723	GGGACTCGTTGTCCCT.1_1	shNC	0	0	0	1.36863	0	1.9257	0	0	0	0	0	1.36863	0	0	0	0	0	0	0	0	0	0	0	0	0	0	0	1.36863	0	0	0	0	0	0	0	0	2.92208	0	0	0	0	0	0	0	1.9257	0	0
725	GGGATCCGTATGTCAC.1_1	shNC	2.30268	0	0	0	0	0	0	0	0	0	0	1.38637	0	0	0	0	0	0	3.21897	0	0	0	0	0	1.38637	0	1.38637	0	0	0	0	0	0	0	0	2.30268	1.38637	0	1.38637	0	0	0	0	0	1.946	0	0
726	GGGCCATAGAAACACT.1_1	shNC	0	0	0	1.58033	0	0	0	0	0	0	0	1.58033	0	0	0	0	0	0	1.58033	0	0	0	0	0	1.58033	0	1.58033	0	0	0	0	0	0	0	0	0	0	0	0	1.58033	0	0	0	0	1.58033	0	0
728	GGGCCATGTACACTCA.1_1	shNC	0	0	0	1.9594	0	0	0	0	0	0	0	0	1.62204	0	0	0	0	0	2.21121	0	0	0	1.10912	0	1.10912	0	1.10912	1.10912	0	0	1.10912	0	0	0	0	0	0	0	1.9594	0	0	0	0	0	0	0	0
731	GGGCTCAAGAGCAGCT.1_1	shNC	0	0	0	0	0	0	0	0	0	0	0	2.45722	0	0	0	0	0	0	3.10659	0	0	0	0	0	0	0	0	0	0	0	2.45722	0	0	0	0	0	0	0	0	0	0	0	0	0	0	0	0
734	GGGTCACAGCTAATCC.1_1	shNC	0	0	0	0	0	0	0	0	0	0	0	0	0	0	0	0	0	0	1.41	0	0	0	0	0	1.97296	0	0	0	0	0	0	0	0	1.41	0	0	0	0	0	0	0	0	0	0	1.41	0	0
737	GGGTGTCGTAGACAGC.1_1	shNC	0	0.816456	0.816456	0	0	1.56599	0	0	0.816456	0	0	0.816456	0	0	0	0	0	0	2.14883	0	0	0	0	0	0.816456	1.25986	0	1.80004	1.25986	0	0	0	0	0	0	1.56599	0	0	0.816456	0	0	0	0	0	0	1.25986	0
739	GGGTTTACAGTTGGTT.1_1	shNC	0	0	1.60816	0	0	0	0	0	0	0	0	2.1958	0	0	0	0	0	0	2.56347	0	0	0	0	0	0	0	0	0	0	0	0	0	0	0	0	0	2.83171	0	1.60816	0	0	0	0	1.60816	1.60816	0	0
744	GGTCTGGTCGCAATTG.1_1	shNC	0	0	0	0	0	1.14552	0	0	0	0	0	0	0	0	0	0	0	0	0.728534	0	0.728534	0	0	0	2.46133	0	1.43892	0.728534	0	0	0	0	0.728534	0	0.728534	1.43892	1.14552	0	0	0.728534	0	0	0	0.728534	0	0.728534	0
746	GGTGAAGAGATCCTAC.1_1	shNC	0	0	0	2.28452	0	0	0	0	1.37126	0	0	1.92871	0	0	0	0	0	0	2.92541	0	0	0	0	0	1.92871	0	1.92871	0	0	0	1.37126	0	0	0	0	1.37126	1.92871	0	0	0	0	0	0	0	0	0	0
747	GGTGAAGCAAGATTGA.1_1	shNC	0	1.45064	0	1.45064	0	0	0	0	0	0	0	0	0	0	0	0	0	0	2.85239	0	0	0	0	0	1.45064	0	0	1.45064	0	0	1.45064	0	0	0	0	0	0	0	0	0	0	0	0	0	0	0	0
748	GGTGAAGGTGACTGTT.1_1	shNC	0	0	0	1.25116	0	0	0	0	0	0	0	0	0	0	0	0	0	0	1.25116	0	0	0	0	0	1.78989	0	0	0	0	0	0	0	0	0	0	1.25116	0	0	0	0	0	0	0	0	1.78989	1.25116	1.25116
750	GGTGATTTCGTGAGAG.1_1	shNC	0	1.07939	0	1.07939	0	0	0	0	0	0	0	0	0	0	0	0	0	0	1.92113	0	0	0	0	0	1.92113	0	2.17151	1.58632	0	0	0	0	0	1.07939	1.07939	0	0	0	0	0	0	0	0	0	1.07939	0	0
751	GGTGGCTAGGGACCAT.1_1	shNC	0	0	0	1.18958	0	1.71765	0	0	1.18958	0	0	1.18958	0	0	0	0	0	0	0	0	0	0	1.18958	0	1.18958	0	1.18958	0	0	0	0	0	0	0	0	0	2.06142	0	0	0	0	0	0	1.18958	2.06142	0	0
752	GGTGTCGCAGAAGCGT.1_1	shNC	0.918245	0	0	0.918245	0	0	0	0	0	0	0.918245	0	0	0	0	0	0	0.918245	0.918245	0	0	0	0	0	0.918245	0	0	0	0	0	0	0	0.918245	0	0	1.70741	0	0	0	0	0	0	0	0	1.38874	0	0
754	GGTTAACAGGATACGC.1_1	shNC	0	0	0	0	0	0	0	0	0	0	0	0	0	0	0	0	0	0	1.16005	0	1.16005	0	0	0	1.68273	0	0	2.27833	0	0	0	0	0	0	0	0	0	0	1.16005	0	0	0	0	0	1.16005	0	0
757	GTAACACAGATCACCT.1_1	shNC	0	0	0	0	0	0	0	0	0	0	0	0	0	0	0	0	0	0	1.72085	0	0	0	0	0	1.40106	0	0	1.72085	0	0	0	0	0	0.928122	0	1.96277	1.40106	0	1.40106	0	0.928122	0	0	0	0	1.40106	0
759	GTAACACTCCTCAGAA.1_1	shNC	0	0	0.793222	0	0	0.793222	0	0	0	0	0	0.793222	0	0	0	0	0	0	1.76508	0	0	0	0	0	1.76508	1.22994	1.22994	1.22994	1.76508	0	0	0	0	0	0	0	0	0	0.793222	0	0	0.793222	0	0	1.22994	0.793222	0
760	GTAACACTCTTAATCC.1_1	shNC	0	0	0	0	0	0	0	0	0	0	0	0	0	0	2.88594	0	0	0	0	0	0	0	0	0	0	0	0	0	0	0	0	0	0	0	0	0	0	0	2.88594	0	0	0	0	0	0	0	0
765	GTAATGCGTCTTCTAT.1_1	shNC	0.442469	0.748151	0.442469	0.442469	0	0.981942	0	0	0.442469	0	0.442469	0.981942	0.442469	0.442469	0	0	0	0.442469	0.748151	0	0	0.442469	0.748151	0	0	0	0.748151	1.1713	0	0	0.442469	0	0.981942	0	0.748151	0	1.1713	0	0.981942	0	0	0	0	0	1.69605	0.442469	0
766	GTAGAAAAGTCGTTAC.1_1	shNC	0	0	0	0	0	1.35674	0	0	0.892716	0	0.892716	0	0	0	0.892716	0	0	0	1.91206	0	0.892716	0	0	0	2.40625	0	0	1.91206	0	0	0	0	0	0	0	0	0	0	0	0	0	0.892716	0	1.35674	1.67246	0	0
769	GTAGAGGTCCGTAGGC.1_1	shNC	0	0.822204	0	0	0.822204	2.71009	0	0	0	0	0	1.57413	0	0	0	0	0.822204	0	1.80862	0	0.822204	0	0	0	2.29542	0	0.822204	0.822204	0	0	0	0	0.822204	0	1.26724	1.80862	1.99844	0	0	0.822204	0	0	0	0.822204	1.26724	0.822204	0
771	GTAGCTAGTTCGTACA.1_1	shNC	1.48034	0	0	0	0	0	0	0	0	0	0	0	0	0	0	0	0	0	2.0527	0	0	0	0	0	1.48034	0	0	1.48034	0	0	1.48034	0	0	0	0	1.48034	1.48034	0	1.48034	0	0	0	0	0	0	0	0
773	GTATTGGCAGAAGCTG.1_1	shNC	0	0	0	0	0	1.75225	0	0	0	0	0	0	0	0	0	0	0	0	2.09819	0	0	0	1.219	0	1.75225	0	2.09819	0	0	0	1.219	0	0	0	0	1.219	0	0	0	0	0	0	0	0	2.35472	0	0
776	GTCAAACCAGAATGTA.1_1	shNC	0.69966	0	1.10729	0	0	2.65112	0	0	1.10729	0	0	0.69966	0	0	0	0.69966	0	0	0.69966	0	0	0	0	0	2.09081	0	0.69966	0	0	0	0	0	1.10729	0	0.69966	1.61984	1.61984	0	0	0	0	0	0	1.10729	1.39605	0	0
780	GTCACGGCAAATGATG.1_1	shNC	0	0	0	0	0.889578	2.10053	0	0	0	0	0	0	0	0	0	0	0	0	0	0	0.889578	0	0	0	0	0	1.35279	1.90753	0.889578	1.35279	0	0	0	0.889578	0.889578	0.889578	0	0	0	0	0	0	0	0	2.10053	0	0
781	GTCACGGGTCCTATAG.1_1	shNC	0	0	0	2.20977	0	0	0	0	0	0	0	0	0	0	0	0	0	0	2.84649	0	0	0	2.20977	0	3.05795	0	2.20977	0	0	0	0	0	0	0	0	0	2.20977	0	0	0	0	0	0	1.62073	0	0	0
782	GTCACGGTCACCTACC.1_1	shNC	0	0.588214	0	0	0	1.22445	0	0	0.956103	0	0	0.588214	0	0	0	0	0.588214	0	1.22445	0	0.588214	0	0.588214	0	2.73527	1.43582	0.588214	1.61021	2.19808	0.588214	0.588214	0	0.956103	0.588214	0	0.956103	1.61021	0	0.956103	0	0	0	1.22445	0	0.588214	1.22445	0
783	GTCACGGTCATCTACT.1_1	shNC	0	1.05329	1.5548	0	0	1.5548	0	0	1.05329	0	0	0	0	0	0	0	0	0	2.13633	0	0	0	0	0	1.05329	0	1.5548	0	0	0	1.88725	0	1.05329	0	0	1.05329	1.88725	0	1.05329	0	0	0	0	0	2.13633	1.05329	0
785	GTCATGACAAATTGGA.1_1	shNC	0	0	0	0	0	1.37258	0	0	0	0	1.37258	1.08643	0	0	0	1.37258	0	0	0.684024	0	0	0	0	0	1.37258	0	0.684024	0	0	0	0	0	0.684024	0	0	0.684024	0	0	0	0	0	0	0	0.684024	0	0.684024	0
786	GTCATTTCATTCGATG.1_1	shNC	0	0	0.521085	0	0	2.48003	1.11565	0	1.8673	0	0	0.861923	0	0	0	0	0	0	1.62985	0	0.521085	0	0.861923	0	1.96777	0	0.521085	1.11565	0.521085	0.861923	0	0	0	0	0	1.11565	0	0	0	0	0	0	0.861923	0	1.11565	0.861923	0
787	GTCGAATGTATACCCA.1_1	shNC	0	0	0	0	0	0	0	0	0	0	0	0	0	0	0	0	0	0	1.92896	0	0	0	0	0	2.92569	0	1.92896	2.54668	1.92896	0	0	0	0	0	0	2.54668	0	0	0	0	0	0	0	0	0	0	0
788	GTCGAATGTTTCGACA.1_1	shNC	0	0	0	1.56849	0	0	0	0	0	0	0	0	0	0	1.56849	0	0	0	2.15162	0	0	0	0	0	0	0	0	0	0	0	0	0	0	0	1.56849	0	2.51755	0	0	0	0	0	0	0	0	0	0
789	GTCGCGATCTGCGGAC.1_1	shNC	0	0	0	0	0	0	0	0	0	0	0	0	0	0	0	0	0	0	2.90587	0	0	0	0	0	0	0	0	0	0	0	0	0	1.91108	0	0	1.91108	2.90587	0	0	0	0	0	0	0	0	1.91108	0
792	GTCTAGAAGGGTTAAT.1_1	shNC	0	0	0	0	0	0	0	0	0	0	0	0	0	0	0	0	0	1.30278	2.46114	0	0	0	0	0	0	0	1.84988	1.30278	1.30278	0	0	0	0	0	1.30278	1.30278	2.2015	0	1.30278	0	0	0	0	0	1.30278	0	0
793	GTCTTTAAGAGTGTGC.1_1	shNC	0	0	0	0	0	0	0	0	0	0	0	0	0	0	0	0	0	0	0	0	0	0	0	0	0	0	2.22398	0	0	0	0	0	0	0	0	0	3.07316	0	0	0	0	0	0	1.63355	1.63355	0	0
796	GTCTTTATCCAAACCA.1_1	shNC	1.3475	0	0.885375	0	0	0	0	0	0	0	0	0	0	0	0	0	0	0	2.89518	0	0.885375	0	0	0	1.66235	0	1.90145	0	0.885375	0	1.3475	0	0	0	0	0	0	0	0	0	0	0	1.3475	0	1.3475	0	0
797	GTGACGCAGGCAGCTA.1_1	shNC	0	0.532326	0	0	0	0.532326	0	0	0	0	0	0.532326	0	0	0	0	0	0.532326	0.877873	0	0	0	0	0	0.532326	0	1.13419	0	0	0	0	0	0.532326	0	0	0.532326	0.877873	0	0.877873	0	0	0	0	0.532326	1.13419	0	0
799	GTGAGCCTCTCCTGTG.1_1	shNC	0	0	0	0	1.34697	0	0	0	0	0	0	0	0	0	0	0	0	0	2.51633	0	0	0	0	0	1.34697	1.34697	0	1.34697	0	0	0	0	0	0	0	0	1.34697	0	0	0	0	0	0	0	2.51633	0	0
800	GTGAGTTGTAAGTCAA.1_1	shNC	1.85305	0	0	1.85305	0	0	0	0	0	0	0	0	1.85305	0	0	0	0	0	1.85305	0	0	0	0	0	0	0	0	0	0	0	0	0	0	0	1.85305	1.85305	0	0	1.85305	0	0	0	0	0	0	0	0
803	GTGCACGCATCTATCT.1_1	shNC	0	0	0	0	0	0	0	0	0	0	0	0	0	0	0	0	0	0	0	0	0	0	0	0	3.21466	2.5609	0	0	0	0	0	0	0	0	0	0	0	0	0	0	0	0	0	0	0	0	0
804	GTGCACGCATCTCAAG.1_1	shNC	0	0	0	0	0	1.19261	0	0	0	0	0	0	0	0	0	0	0	0	2.83731	0	1.19261	0	0	0	1.72122	0	0	0	0	0	0	0	0	0	0	0	0	0	0	0	0	0	0	0	0	0	0
808	GTGCGTGCAACTGATC.1_1	shNC	0	0	0	0	0	0	0	0	0	0	0	0	1.62514	0	0	0	0	0	1.62514	0	1.11172	0	0	0	2.21466	1.11172	1.62514	0	1.11172	0	0	0	0	0	0	0	1.96273	0	0	0	0	0	0	1.11172	0	1.62514	0
809	GTGCGTGGTAGCTTTG.1_1	shNC	0.906914	0	0.906914	0	0.906914	0	0	0	0	0	0	0.906914	0	0	0	0	0.906914	0	0.906914	0	0	0	0	0	1.69194	0.906914	0.906914	0.906914	0	0.906914	0.906914	0	0.906914	0	0	0	2.12625	0	0	0	0	0	0	0	1.93249	0.906914	0
812	GTGGAAGAGAAATTGC.1_1	shNC	0	0	0	2.73194	0	1.52402	0	0	0	0	0	0	0	0	0	0	0	0	2.46572	0	0	0	0	0	1.52402	0	1.52402	0	0	0	0	0	0	0	0	0	0	0	2.10185	0	0	0	0	0	2.10185	0	0
813	GTGGAAGGTGAGACCA.1_1	shNC	0	0	0	0	0	0	0	0	0	0	0	0	0	0	0	2.25013	0	0	0	0	0	0	0	0	0	2.25013	0	0	0	0	0	0	0	0	0	0	0	0	0	0	0	0	0	0	0	0	0
814	GTGGAAGTCCCGAACG.1_1	shNC	0	0	0	0	0	1.94368	0	0	1.38435	0	0	1.38435	0	0	0	0	0	0	1.38435	0	0	0	1.38435	0	1.94368	0	0	0	0	0	0	0	0	0	0	0	0	0	0	0	0	0	0	0	0	1.38435	0
818	GTGTCCTCAGTGGCTC.1_1	shNC	0	0	0	2.56532	0	1.94625	0	0	0	0	0	0	0	0	0	0	0	0	2.56532	0	0	0	0	0	0	0	0	0	0	0	0	0	0	0	0	1.94625	0	0	0	0	0	0	0	0	0	0	0
819	GTGTCCTCATGGAACG.1_1	shNC	0.753527	0	0.753527	0	0	0.753527	0	0	0.753527	0	2.11735	0	0	0	0	0.446121	0	0.988321	0	0	0	0	0.753527	0	0.988321	0.446121	0	0	0	0	0.988321	0	0.753527	0	1.17833	0.446121	0.988321	0	0.446121	0	0	0	0	0.446121	1.97195	0.446121	0
820	GTGTCCTTCCTGTACC.1_1	shNC	0	0	0	0	0	0	0	0	0	0	0	0	0	0	0	0	0	0	2.87799	0	0	0	0	0	0	0	0	0	0	0	0	0	0	0	0	0	0	0	0	0	0	0	0	0	0	0	0
822	GTGTTCCCAATAGGAT.1_1	shNC	0	0	0	0	0	1.5625	0	0	0	0	0	0	0	0	0	1.5625	0	0	2.14493	0	0	0	1.5625	0	0	0	0	0	0	0	0	0	0	0	0	0	1.5625	0	0	0	0	0	0	0	0	0	0
823	GTTACAGCACCGAATT.1_1	shNC	0.941746	0.941746	0	0.577864	0	1.20797	0	0	0.577864	0	0.941746	0.577864	0	0	0	0	0	0	0	0	0	0	1.20797	0	1.20797	0	0.941746	0.941746	0	0	0.941746	0	0	0.577864	0.577864	0.577864	2.08444	0	0.577864	0	0	0	0	0	1.7393	0.941746	0
825	GTTACAGTCACTCTTA.1_1	shNC	0	2.39608	0	1.79009	0	0	0	0	1.79009	0	0	1.79009	0	0	0	0	0	0	2.39608	0	0	0	0	0	0	1.79009	0	3.04262	0	0	1.79009	0	0	0	0	0	1.79009	0	0	0	0	0	1.79009	0	1.79009	0	0
827	GTTAGACCACGTAGAG.1_1	shNC	0.52078	0	0.52078	0.861488	0	0	0	0	0.861488	0	2.14203	1.31731	0	0.52078	0	1.11515	0	0.52078	0.861488	0	0	0	0.52078	0	1.48539	0	0.861488	1.11515	0	0	0.52078	0	0.52078	0.52078	0	0.861488	0	0	1.31731	0	0	0	0	0	0.52078	0.52078	0
828	GTTATGGCACTGGACC.1_1	shNC	1.46314	0	0	1.46314	0	0.978233	0	0	0	0	0	0.978233	0	0	0	0	0	0	2.76869	0	0	0	0.978233	0	2.53514	0.978233	1.46314	0	0	0	1.7883	0	0	0	0	0	2.76869	0	1.7883	0	0	0	0.978233	0	1.7883	0	0
829	GTTATGGTCATAAGGA.1_1	shNC	0	0	0	0	0	0	0	0	0	0	0	0	0	0	1.61813	0	0	0	0	0	0	0	0	0	0	0	0	0	0	0	0	0	0	0	0	0	0	0	0	0	0	0	0	0	1.61813	0	0
830	GTTCATTAGGTTTGAA.1_1	shNC	0	0	0	0.818504	0	0	0	0	0.818504	0	2.41026	0.818504	0	0	0	0.818504	0	0.818504	1.26249	0	0	0.818504	0	0.818504	1.8031	0	1.26249	0.818504	0.818504	0	1.56889	0	0	0	0.818504	0	0	0	0.818504	0	0	0	0.818504	0	2.41026	0.818504	0
831	GTTCCGTCAATAAGGT.1_1	shNC	0.919603	0	0.407307	0.407307	0	1.61385	0	0	0.407307	0	0.407307	0.407307	0	0	0	0.407307	0	1.25671	0	0	0	0	0	0	1.39043	0.407307	0.695909	0.695909	0	0	0.695909	0	0.695909	0	1.10229	0	0.407307	0	0.695909	0	0	0	0	0.695909	0.695909	0.407307	0
832	GTTCGCTAGCGACAGT.1_1	shNC	0	1.03797	0	1.03797	0	2.74649	0	0	1.03797	0	0	0	0	0	0	0	0	0	1.03797	0	1.03797	0	0	0	1.86725	0	1.53622	1.53622	0	1.03797	1.03797	0	0	0	0	0	0	0	1.03797	0	0	0	0	1.03797	0	0	0
833	GTTCGCTAGGCTTAAA.1_1	shNC	0	0	0	2.35601	0	0	0	0	0	0	0	0	0	0	0	0	0	0	2.35601	0	0	0	0	0	2.09944	0	1.75344	1.22	0	0	1.22	0	0	0	0	0	2.35601	0	0	0	0	0	0	0	1.22	0	0
835	GTTCTATGTAGAATGT.1_1	shNC	0	2.37459	0	1.77042	0	0	0	0	0	0	0	0	0	0	1.77042	0	0	0	2.37459	0	0	0	0	0	0	0	0	0	0	0	0	0	0	0	0	1.77042	1.77042	0	0	0	0	0	0	0	0	0	0
836	GTTGCTCAGGTCGCCT.1_1	shNC	0	0	0	1.62269	0	0	0	0	0	0	0	0	0	0	0	0	0	0	0	0	0	0	0	0	2.21194	0	1.62269	0	0	0	1.62269	0	0	1.62269	0	0	2.58022	0	0	0	0	0	0	0	0	0	0
838	GTTTACTCAATTTCTC.1_1	shNC	1.78347	0	1.78347	0	0	0	0	0	0	0	0	0	0	0	0	0	0	0	1.78347	0	0	0	0	0	0	0	0	0	0	0	1.78347	0	0	0	1.78347	1.78347	0	0	2.38885	1.78347	0	0	0	0	0	0	0
840	TAACTTCAGCTAGAAT.1_1	shNC	0	0	0	1.08286	0	0	0	0	0	0	0	0	0	0	0	0	0	0	2.37636	0	0	0	0	0	1.08286	0	1.92562	1.08286	0	0	1.08286	0	0	0	0	0	0	0	0	0	0	0	1.08286	1.08286	0	0	0
841	TAACTTCTCACACCGG.1_1	shNC	0	1.27499	0	0	0	0	0	0	0	0	0	0	0	0	0	0	0	0	1.81764	0	0	0	0	0	0	0	1.27499	1.81764	0	0	1.81764	0	0	1.27499	0	0	0	0	0	0	0	0	0	0	1.27499	0	0
842	TAAGCACAGTGTTGTC.1_1	shNC	0	0	0	0	0	0	0	0	0	0	2.13238	0	0	0	0	0	0	0	2.13238	0	0	0	0	0	0	0	0	0	0	0	0	0	0	0	0	2.76442	0	0	0	0	0	0	0	0	0	0	0
848	TAATCTCGTTTCGCTC.1_1	shNC	0	0	0	0	0	0	0	0	1.61813	0	0	0	0	0	1.61813	0	0	0	1.61813	0	0	0	0	0	0	0	1.61813	0	0	0	0	0	1.61813	0	0	1.61813	0	0	0	0	0	0	0	0	0	0	0
849	TAATTCCTCCCAGGAC.1_1	shNC	0.769902	0	0	0.769902	0.769902	1.1997	0	0	0	0	0	0.769902	0	0	0	0	0	0	1.49932	0	0	0	0	0	1.1997	0	0.769902	0	0	1.72957	0	0	0	0	0	0	0	0	0	0	0	0	0	0.769902	0	0	0
851	TACACCCGTCGCTTGG.1_1	shNC	1.03951	0	0	0	0	1.03951	0	0	0	0	1.03951	1.03951	0	0	1.53808	0	0	0	1.86925	0	1.03951	0	0	0	1.03951	0	1.03951	0	0	0	0	0	0	0	0	1.03951	2.11761	0	1.53808	0	0	0	0	0	1.03951	0	0
855	TACCCACGTCGAAACG.1_1	shNC	0	0	0	0	0	2.42845	0	0	0	0	0	0	0	0	0	0	0	0	0	0	0	0	0	0	0	0	0	0	0	0	1.8198	0	0	0	0	0	0	0	0	0	0	0	0	0	2.80408	0	0
856	TACCCGTGTGTATCCA.1_1	shNC	0	0	0	0	0.866092	1.8734	0	0	0	0	0	0	0	0	0	0	0	0	2.06534	0	0	0	0	0	2.22631	1.63565	0	0.866092	0	0.866092	0.866092	0	0.866092	0	0	0.866092	1.63565	0	0	0	0	0	0	0	1.32314	0	0
857	TACCCGTTCCTATTGT.1_1	shNC	0	0	0	1.45675	0	2.02604	0	0	0	0	0.740667	0.740667	0	0	0	0	0	0	0.740667	0	0	0	0	0	1.16148	0	1.45675	0	0	0	1.16148	0	0.740667	0	0.740667	0	1.45675	0	0	0	0	0	0	0.740667	0.740667	1.45675	0
858	TACCGAACACTTCCTG.1_1	shNC	0	1.14713	0	0	0	0	0	0	0	0	0	1.66739	0	0	0	0	0	0	2.26141	0	0	0	0	0	2.00787	0	0	0	0	0	1.14713	0	0	0	0	1.14713	1.66739	0	1.14713	1.14713	0	0	0	0	0	0	0
859	TACCGAAGTAGGAGGG.1_1	shNC	0	0	0	0	0	1.27499	0	0	0	0	0	1.27499	0	0	0	0	1.27499	0	0	0	0	0	0	0	1.27499	0	1.27499	0	0	0	0	0	0	0	0	1.81764	1.27499	0	1.81764	0	0	0	0	0	1.81764	0	0
860	TACCGGGAGAGCACTG.1_1	shNC	0	0	0	0	0.955216	1.43472	0	0	0.955216	0	0	0	0	0	0	0	0	0	2.00106	0	1.43472	0	0	0	1.75746	0.955216	0	0	0.955216	0.955216	0	0	0	0.955216	0.955216	0.955216	0	0	0	0	0	0	0	0	0.955216	0	0
861	TACCGGGAGTTTCGGT.1_1	shNC	1.23415	0	0	2.11702	0	1.23415	0	0	0	0	1.23415	1.23415	0	0	0	0	0	0	2.5785	0	0	0	0	0	0	0	1.23415	0	0	0	1.23415	0	0	0	0	0	1.23415	0	0	0	0	0	0	0	0	0	0
870	TACGGGCTCCCACAGG.1_1	shNC	0	0.321205	0	0	0	1.89939	0	0	0.321205	0	0.321205	0.321205	0	0	0.321205	0.321205	0	1.48367	0.321205	0	0.321205	0	0	0	0.563935	0	0.321205	0.563935	0	0	0	0	0.321205	0	0	0	0.321205	0	0.321205	0	0	0	0	0.321205	1.06262	0	0
871	TACGGTACAAGCTGTT.1_1	shNC	0	0	0	0	0	0	0	0	0	0	0	0	0	0	0	0	0	0	0	0	1.67457	0	0	0	2.26934	0	0	2.26934	0	0	1.67457	0	1.67457	0	0	1.67457	2.63974	0	0	0	0	0	0	0	0	0	0
872	TACGGTAGTAAGAACT.1_1	shNC	0	0	0	0	0	1.35899	0	0	0.894508	0	0	0.894508	0	0	0	0	0	0	1.35899	0	0	0	0	0	1.91464	0	1.91464	0.894508	0	0	0.894508	0	0.894508	0	0	0	2.53124	0	0	0	0	0	0.894508	0	0.894508	0	0
873	TACGTCCTCTCACCCA.1_1	shNC	0	1.69915	0	2.04173	0	1.17392	1.17392	0	1.17392	0	0	1.17392	0	0	0	0	0	0	0	0	1.17392	0	0	0	2.04173	0	0	2.04173	1.69915	1.17392	2.04173	0	0	0	1.17392	2.04173	1.17392	0	1.69915	0	0	0	0	0	0	1.17392	0
874	TACTGCCGTCCACGCA.1_1	shNC	0	0	0	0	0	0	0	0	0	0	0	0	0	0	0	0	0	0	2.00676	0	0	0	0	0	0	0	0	0	0	0	0	0	2.00676	0	0	0	0	0	0	0	0	0	0	0	2.00676	0	0
876	TAGACCAAGTCCGCGT.1_1	shNC	0	0	0	1.15765	0	1.67988	0	0	0	0	0	0	0	0	0	0	0	0	2.27519	0	0	1.15765	0	0	1.15765	0	1.67988	1.67988	0	0	0	0	0	0	0	0	1.67988	0	0	0	0	0	0	0	0	0	0
877	TAGACCATCCGTGTAA.1_1	shNC	2.76735	0	0	0	0	0	0	0	1.38211	0	0	1.38211	0	0	0	0	0	0	2.5598	0	0	0	0	0	1.38211	1.38211	0	0	0	0	1.94113	0	0	0	0	1.38211	1.94113	0	1.38211	0	0	0	0	0	0	0	0
878	TAGATCGGTTTACGTG.1_1	shNC	0	0	0	0	0	0	0	0	0	0	0	0	0	0	0	0	0	0	0	0	0	0	0	0	0	0	0	0	0	0	0	0	0	0	0	0	0	0	2.26624	0	0	0	0	0	0	0	0
879	TAGCACAGTGCAATAA.1_1	shNC	0	0	0	0	0	0.98135	0	0	0	0	0	1.46698	0	0	0	0	0	0	2.03761	0	0	0	0	0	0.98135	0	0	0.98135	0	1.46698	0	0	0	0	0	0	2.23434	0	0	0.98135	0	0	0.98135	0	1.46698	0	0
881	TAGGTACGTACGGGAT.1_1	shNC	2.199	0	0	0	0	0	0	0	0	0	0	0	0	0	1.61104	0	0	0	3.2208	0	0	1.61104	0	0	1.61104	0	0	0	0	0	1.61104	0	0	0	0	0	2.199	0	0	0	0	0	0	0	1.61104	0	0
886	TATATCCAGGGCTAAC.1_1	shNC	2.0146	0	0	2.0146	0	0	0	0	0	0	0	0	0	0	0	0	0	0	0	0	0	0	2.63873	0	2.0146	0	0	0	0	0	2.0146	0	0	2.0146	0	0	2.0146	0	2.0146	0	0	0	0	0	0	0	0
889	TATCCTACAAGTCGTT.1_1	shNC	0	0	0	0	0	0	0	0	0	0	0	0	0	0	1.84493	0	0	0	1.84493	0	0	0	0	0	0	0	0	0	0	0	0	0	0	0	0	2.45576	0	0	0	0	0	0	0	0	0	1.84493	0
890	TATCCTACAGAGTCAG.1_1	shNC	1.05256	1.05256	0	0	0	1.55391	0	0	0	0	0	0	0	0	0	0	0	0	1.55391	0	0	0	0	0	1.05256	0	0	1.05256	0	0	0	0	0	1.05256	0	1.05256	2.13534	0	0	0	0	0	1.55391	0	1.8863	0	0
891	TATCGCCCAGGACTTT.1_1	shNC	0	0	0	0	0	0.833226	0	0	0	0	0	0.833226	0	0	0	0	0	0	2.63958	0	0	0	0	0	1.28134	0	0.833226	0	0	0	0.833226	0	0	0.833226	0	0.833226	0.833226	0	0	0	0	0	0	0	1.28134	0	0
892	TCAAGACTCCATGCAA.1_1	shNC	0	0	0	1.59207	0	1.59207	0	0	0	0	0	0	0	0	1.59207	0	0	0	2.1779	0	0	0	0	0	1.59207	0	1.59207	1.59207	0	0	0	0	0	1.59207	0	0	2.54488	0	1.59207	0	0	0	0	0	2.54488	0	0
900	TCACAAGGTCGACGCT.1_1	shNC	2.45301	0	0	1.51316	0	0	0	0	0	0	0	0	0	0	0	0	0	0	1.51316	0	0	0	0	0	1.51316	0	0	0	0	0	0	0	0	0	0	0	1.51316	0	1.51316	0	0	0	0	0	0	2.08966	0
903	TCAGCAAGTAAGATAC.1_1	shNC	0	0	0	2.61317	0	0	0	0	0	0	0	1.99076	0	0	0	0	0	0	2.61317	0	0	0	0	1.99076	2.61317	0	0	0	0	0	1.99076	0	0	0	0	1.99076	1.99076	0	1.99076	0	0	0	0	0	0	0	0
905	TCAGCCTGTCTCGGGT.1_1	shNC	0	0	0	2.13863	0	2.13863	0	0	0	0	0	0	0	0	1.55686	0	0	0	1.55686	0	0	0	0	0	2.13863	0	1.55686	0	0	0	0	0	2.13863	2.13863	0	0	0	0	0	0	0	0	0	1.55686	0	0	0
909	TCAGTGAGTTGAGGAC.1_1	shNC	2.33912	0	0	0	0	0	0	0	0	0	0	0	0	0	1.73801	0	0	0	0	0	0	0	0	1.73801	2.71192	0	1.73801	1.73801	0	0	0	0	0	0	0	0	0	0	0	0	0	0	0	0	1.73801	0	0
912	TCATACTCACATACTG.1_1	shNC	0.964563	0.964563	0	0	0	0	0	0	0	0	0	0	0	0	0.964563	0	0	0	2.21027	0	0	0	0	0	1.77001	0	0	0.964563	0	0	1.77001	0	0	0	0	1.44628	1.77001	0	0.964563	0	0	0	0	0	0	0.964563	0
913	TCATACTTCTGAGGCC.1_1	shNC	0	0	0	1.93502	0	0	0	0	0	0	0	0	0	0	0	0	0	0	2.93239	0	0	0	0	0	3.20667	0	2.93239	0	0	0	1.93502	0	0	0	1.93502	0	0	0	0	0	0	0	0	0	0	0	0
916	TCATCCGCAGCTACTA.1_1	shNC	1.06585	0	0	0	0	1.06585	0	0	1.06585	0	0	1.56999	0	0	0	0	0	0	0	0	0	0	0	0	1.06585	0	1.06585	1.06585	0	0	0	0	1.06585	0	0	1.56999	1.56999	0	1.06585	0	0	0	0	0	0	1.90359	0
917	TCATCCGGTATCTCGA.1_1	shNC	0	0	1.43753	1.43753	0	0	0	0	0	0	0	1.43753	0	0	0	0	0	0	1.43753	0	0	0	0	0	1.43753	0	1.43753	0	0	0	0	0	0	0	0	0	0	0	1.43753	0	0	0	0	0	0	0	0
918	TCATGCCAGTAACAGT.1_1	shNC	0	0	0	1.52318	0	0	0	0	0	0	0	1.52318	0	0	0	0	0	0	2.46474	0	0	0	0	0	2.46474	0	0	1.52318	0	0	0	0	0	0	0	0	2.10091	0	0	0	0	0	0	0	0	0	0
924	TCATTGTGTTTAGTCG.1_1	shNC	1.88362	0	0	1.332	0	2.70425	0	0	0	0	0	0	0	0	0	0	0	0	2.70425	0	0	0	0	1.332	1.332	0	1.88362	1.332	0	0	1.88362	0	0	0	0	0	1.88362	0	1.332	0	0	0	0	0	1.332	2.23707	0
927	TCCATCGCACCGGTCA.1_1	shNC	0	0	0	1.63024	0	2.85764	0	0	0	0	0	1.63024	0	0	0	0	0	0	1.63024	0	0	0	0	0	1.63024	0	0	0	0	0	0	0	0	0	0	1.63024	0	0	0	0	0	0	0	0	1.63024	0	0
929	TCCATGCCACTTTATC.1_1	shNC	0	0	0	0	0	1.4422	0	0	0	0	0	0	0	0	0	0	0	0	1.4422	0	0	0	0	0	1.4422	0	2.3693	0	0	0	0	0	0	0	0	0	2.63332	0	0	0	0	0	0	0	1.4422	0	0
930	TCCATGCTCGATGGAG.1_1	shNC	0	0	0	0	0	0	0	0	0	0	0	0	0	0	0	0	0	0	1.85851	0	0	0	0	0	0	0	0	0	0	0	0	0	0	0	0	1.85851	0	0	0	0	0	0	0	0	0	0	0
933	TCCCAGTAGGTAACTA.1_1	shNC	0	0	0	0	0	2.11169	0	0	0	0	0	0	0	0	0	0	0	0	2.74241	0	0	0	0	0	2.11169	0	0	0	0	0	2.11169	0	0	0	0	2.11169	0	0	0	0	0	0	0	0	0	0	0
935	TCCCAGTTCGTTCTAT.1_1	shNC	1.67457	0	0	1.67457	0	0	0	0	0	0	0	0	0	0	0	0	0	0	2.26934	0	0	0	0	0	0	0	2.26934	0	0	0	1.67457	0	0	0	0	1.67457	0	0	1.67457	0	0	0	0	0	0	0	0
936	TCCGAAAGTGTTCGTA.1_1	shNC	0	0	0	0	1.30337	2.66781	1.30337	0	1.85056	0	0	0	0	0	0	0	0	0	0	0	0	0	0	0	1.30337	0	0	0	0	1.30337	0	0	0	0	0	0	0	0	1.30337	0	0	0	0	0	1.30337	0	0
941	TCCTCGACAAATGCTC.1_1	shNC	0.979062	0.979062	0	0.979062	0	0	0	0	0	0	0	0	0	0	0	0	0	0	2.76994	0	0	0	0	0	1.46416	0	0	1.46416	0	0	1.7894	0	0.979062	1.46416	0	0.979062	0.979062	0	1.46416	0.979062	0	0	0	0.979062	0.979062	0	0
945	TCCTTTCTCGCTAATG.1_1	shNC	1.40989	1.73046	0	0.93521	0	1.73046	0	0	0	0	0	0.93521	0	0	0	0	0	0	2.80199	0	0	0	1.40989	0	0	0	0.93521	0.93521	0	0	0	0	1.40989	0	0.93521	1.73046	1.97283	0	1.40989	0	0	0	0.93521	1.40989	1.97283	0.93521	0
946	TCGAAGTAGGTTACAA.1_1	shNC	0	0	0	1.8929	0	0	0	0	0	0	0	0	0	0	1.34006	0	0	1.34006	1.34006	0	0	0	0	0	1.8929	0	1.34006	1.34006	0	0	0	0	0	0	1.34006	1.34006	1.34006	0	0	0	0	0	0	0	0	0	0
947	TCGACGGAGTTGGAGC.1_1	shNC	0	0	0	0	0	0	0	0	0	0	0	0	0	0	0	0	0	0	0	0	0	0	0	0	3.15904	0	0	0	0	0	0	0	0	0	0	0	2.50748	0	0	0	0	0	0	0	0	0	0
950	TCGCACTAGTGCGCTC.1_1	shNC	0	0	0	2.02423	0	2.02423	0	0	0	0	0	0	0	0	0	0	0	0	2.02423	0	0	0	0	0	2.02423	0	2.64905	0	0	2.02423	2.02423	0	2.02423	2.64905	0	0	0	0	2.02423	0	0	0	0	0	2.02423	0	0
952	TCGCACTGTCGTTCAA.1_1	shNC	0	0	0	2.19085	0	1.29407	0	0	0	0	0	0	0	0	1.83979	0	0	0	2.45018	0	0	0	0	0	1.29407	0	2.19085	1.29407	0	0	1.83979	0	0	0	0	0	1.83979	0	0	1.29407	0	0	0	1.29407	0	0	0
953	TCGCACTGTCTGCAAT.1_1	shNC	1.48113	1.48113	0	0	0	0	0	0	0	0	0	1.48113	0	0	1.48113	0	0	0	0	0	0	0	0	0	2.41535	0	0	1.48113	0	0	1.48113	0	0	0	0	1.48113	2.88979	0	0	0	0	0	0	1.48113	0	0	0
955	TCGCAGGGTCGCTTGG.1_1	shNC	0	0	0	0	0	2.0392	0	0	0	0	0	0	0	0	0	0	0	0	2.66507	0	0	0	0	0	0	2.0392	0	2.0392	0	0	0	0	0	0	0	0	2.0392	0	0	0	0	0	0	0	2.0392	0	0
956	TCGCTTGTCCTACCAC.1_1	shNC	0	1.59739	0	0	0	0	0	0	0	0	0	0	0	0	0	0	0	0	2.18383	0	0	0	0	0	2.18383	0	0	0	0	0	0	0	1.59739	1.59739	0	0	0	0	0	0	0	0	0	1.59739	1.59739	0	0
958	TCGGATATCAGACCTA.1_1	shNC	0	0	1.40954	0	0	0	0	0	0	0	0	0	0	0	0	0	0	0	1.40954	0	0	0	0	0	1.40954	0	1.40954	1.40954	0	0	0	0	0	0	0	0	0	0	0	0	0	0	0	0	1.40954	0	0
959	TCGGGCACACAGAGCA.1_1	shNC	0	0.354469	0	0.354469	0	1.14011	0	0	0.354469	0	0.354469	1.38077	0.354469	0	0	0.354469	0	0.993879	0.993879	0	0	0	0.354469	0	0.615643	0	0.615643	0.822538	0	0	0.354469	0	0.354469	0	1.14011	0	0	0	0.615643	0.354469	0	0	0	0.822538	0.354469	0.993879	0
960	TCGGGTGAGGCCTAGA.1_1	shNC	0	0	0	0	0	1.11685	0	0	0.862951	0	1.48735	0	0	0	0	0.521808	0.521808	0.862951	0.521808	0	0.521808	0	0.862951	0	1.11685	0	1.11685	0	0	0	0.862951	0	0.862951	0	0.862951	1.31916	1.11685	0	0	0	0	0	0	0.521808	2.22147	0.862951	0
962	TCGGTCTTCTCCTGTG.1_1	shNC	0	0	0.893313	0	0.893313	1.35749	0.893313	0	1.35749	0.893313	0	0.893313	0	0	0	0	0	0	0	0	1.67328	0	0.893313	0	0	0	0	1.67328	0	1.35749	0	0	0	0	0	0.893313	0	0	1.35749	0	0	0	0	0	0	0.893313	0
963	TCGTAGAGTTGAGGAC.1_1	shNC	0	1.66652	0	0	0	0	0	0	0	0	0	0	0	0	0	0	0	0	2.90003	0	0	0	0	0	0	0	2.26045	1.66652	0	0	1.66652	0	0	0	0	0	0	0	0	0	0	0	0	0	0	0	0
965	TCGTCCATCGGCCTTT.1_1	shNC	0	0	0	2.02881	0	0	0	0	0	0	0	0	0	0	2.02881	0	0	0	0	0	0	0	0	0	2.02881	0	0	0	0	0	0	0	0	0	2.02881	2.02881	0	0	0	2.02881	0	0	0	0	0	0	0
966	TCGTGCTAGCCAGAGT.1_1	shNC	0	0	2.01347	0	0	2.01347	0	0	0	0	0	0	2.01347	0	0	0	0	0	0	0	0	0	0	0	0	0	0	0	0	0	0	0	0	0	0	0	0	0	0	0	0	0	0	0	0	0	0
967	TCGTGGGGTCTCTCCA.1_1	shNC	0	0	0	0	0	0	0	0	0	0	0	0	0	0	0	0	0	0	1.57819	0	0	0	0	0	2.16244	2.16244	0	0	0	0	0	0	0	0	1.57819	1.57819	0	0	0	0	0	0	0	1.57819	2.16244	0	0
970	TCTATACCATAACCCA.1_1	shNC	1.67071	0	0	0	0	0	0	1.67071	0	0	0	0	0	0	0	0	0	0	0	0	0	0	0	0	2.26508	0	0	0	0	0	0	0	0	0	0	0	1.67071	0	0	0	0	0	0	0	1.67071	0	0
971	TCTATCAAGCCATGCC.1_1	shNC	0	0	0	1.08312	0	1.59082	0	0	0	0	0	0	0	0	0	0	0	0	1.92595	0	0	0	0	0	1.59082	0	1.08312	1.08312	0	0	1.08312	0	1.59082	0	0	0	2.81127	0	0	0	0	0	0	0	1.08312	0	0
973	TCTCACGAGTTGTACC.1_1	shNC	0	0	0	1.7806	0	1.7806	0	0	0	0	0	0	0	0	0	0	0	0	2.38571	0	0	0	0	0	0	0	0	0	0	0	0	0	0	0	0	1.7806	0	0	0	0	0	0	0	0	0	0	0
974	TCTCAGCCACCCTCTA.1_1	shNC	0.721796	0.53381	0.302109	0.53381	0	1.51008	0	0	0	0	0.302109	0.721796	0	0.302109	0	0	0	1.01651	1.13663	0	0	0	0.721796	0	1.01651	0	0.53381	0	0	0	0.53381	0	0.721796	0.721796	0.53381	1.01651	1.13663	0	1.13663	0	0	0	0	0	0.879973	0.53381	0
975	TCTCCGAAGGTTGGTG.1_1	shNC	0	0	0	0.799775	0.799775	1.77498	0	0	0	0	0	0	0	0	0	0	0	0	1.2384	0	1.2384	0	0	0	0.799775	0.799775	0.799775	0	0	0.799775	0	0	1.2384	0.799775	0	1.2384	0	0	0	0	0	0	0	0.799775	1.2384	0	0
976	TCTCCGATCAAGTTGC.1_1	shNC	0	1.25009	0	0	0	0	0	0	0	0	0	0	0	0	0	0	0	0	0	0	0	0	0	0	2.59922	0	0	1.25009	0	0	0	0	0	0	1.25009	0	1.78864	0	0	0	0	0	0	0	1.25009	0	0
978	TCTCCGATCGAAGAAT.1_1	shNC	0	0	0	1.20303	0	0.772464	0	0	0.772464	0	0	0.772464	0	0	0	0	0	0	1.73349	0	0	0	0	0	0.772464	0	0.772464	0	0	0	0	0	0	0	0	0	1.20303	0	0.772464	0	0	0	0.772464	0	1.20303	0	0
979	TCTGCCAAGTTCATGC.1_1	shNC	0	0	0	2.1476	0	0	0	0	0	0	0	0	0	0	1.06163	0	0	0	0	0	0	0	0	0	2.89146	0	0	1.06163	0	0	1.56489	0	1.56489	0	1.06163	1.06163	2.89146	0	0	0	0	0	0	0	1.8981	1.06163	0
980	TCTGTCGAGCCGGAAT.1_1	shNC	0	0	0	1.60529	0	0	0	0	0	0	0	0	2.19262	0	0	0	0	0	2.19262	0	0	0	0	0	1.60529	0	0	1.60529	0	0	0	0	0	0	0	0	0	0	0	0	0	0	0	0	0	1.60529	0
981	TCTTAGTCAATACAGA.1_1	shNC	0	0	0	1.80395	0	0	0	0	0	0	0	0	0	0	1.80395	0	0	0	0	0	0	0	0	0	0	0	0	2.41118	0	0	0	0	0	1.80395	0	0	0	0	0	0	0	0	0	0	0	0	0
982	TCTTCCTGTGTTGCCG.1_1	shNC	0	1.93168	0	1.21207	0	0.779426	0	0	0	0	0	0	0	0	0.779426	0	0	0	2.54962	0	0	0	0	0	1.74412	0.779426	1.21207	0	0	0	0.779426	0	0.779426	0	0	1.21207	2.79379	0	1.21207	0	0	0	0	0	1.93168	0	0
984	TCTTGCGTCGTTCTCG.1_1	shNC	0	0	0	0	0	2.31082	0	0	2.31082	0	0	0	0	0	0	0	0	0	2.31082	0	0	0	0	0	2.9531	0	0	0	0	0	2.31082	0	0	0	2.31082	0	0	0	0	0	0	0	0	0	0	0	0
985	TGAACGTTCAATCGGT.1_1	shNC	0	0	0	0	0	0	0	0	0	0	0	0	0	0	0	0	0	0	1.8082	0	0	0	0	0	2.41581	0	0	0	0	0	0	0	0	0	0	0	3.45305	0	0	0	0	0	1.8082	0	2.79106	0	0
987	TGAATGCCAGCCCACA.1_1	shNC	1.60912	0	0	1.29899	0	0	0	0	0	0	0	0	0	0	0	0	0	0	1.84549	0	0	0	0	0	0.847069	0	1.60912	0	0	0	1.29899	0	0	0	0.847069	2.19687	0	0	0	0	0	0	0	0.847069	1.29899	0.847069	0
990	TGAGACTAGAGTGAAG.1_1	shNC	0.572222	0	0.933895	0	0	2.4014	0.572222	0	0.933895	0	0	0.572222	0	0	0	0	0	0	1.72868	0	1.40825	0	0.572222	0	2.07315	0	1.72868	0	0	0.572222	0	0	0	0	0.572222	0	0.572222	0	0.933895	0	0	0.572222	0.572222	0.572222	0	0.572222	0
995	TGAGGGATCAGATGCT.1_1	shNC	0	0	0	0	0	0	0	0	0	0	0	0	0	0	0	0	0	0	0	0	0	0	0	0	3.32383	0	0	0	0	0	0	0	0	0	0	0	2.46016	0	0	0	0	0	0	1.84898	0	0	0
996	TGAGGTTAGTGTGTTC.1_1	shNC	0	1.88078	0	0	0	1.88078	0	0	0	0	0	0	0	0	0	0	0	0	0	0	0	0	0	0	2.49463	0	2.49463	0	0	0	0	0	0	0	1.88078	1.88078	2.49463	0	0	0	0	0	0	0	0	0	0
999	TGATCAGTCGTTTACT.1_1	shNC	1.8929	0	0	0	0	0	0	0	0	0	0	0	0	0	0	0	0	0	2.71446	0	0	0	0	0	0	0	0	1.34006	0	0	0	0	0	0	0	1.34006	2.71446	0	1.34006	0	0	0	0	0	0	0	0
1000	TGATCAGTCTCTGCCA.1_1	shNC	0	0	0	0	0	0	0	0	1.70741	0	1.70741	0	0	0	0	0	0	0	2.30552	0	0	0	0	0	0	0	0	0	0	0	2.30552	0	0	0	0	0	1.70741	0	1.70741	0	0	0	0	0	1.70741	0	0
1001	TGATCTTAGCTGCCAC.1_1	shNC	0	1.21481	0	1.21481	0	0	0	0	0	0	0	1.21481	0	0	0	0	0	0	1.74734	0	0	1.21481	0	0	2.55321	0	1.21481	0	0	0	0	0	0	0	0	0	2.55321	0	0	1.21481	0	0	0	0	1.21481	0	0
1002	TGATTCTCAACCACGC.1_1	shNC	0	0.926092	0	0	0	0	0	0	0.926092	0	0	1.39853	0	0	0.926092	0	0	0.926092	1.39853	0	0	0	0	0	0	0	1.39853	1.39853	0	0	0	0	0	0.926092	0.926092	0.926092	0.926092	0	0.926092	0	0	0	0	0	1.71809	0	0
1003	TGATTCTCAGAGAGGG.1_1	shNC	0	0	0	0	0	2.42939	0	0	0	0	0	0	0	0	0	0	0	0	3.29138	0	0	0	0	0	2.80505	0	1.82067	0	0	0	0	0	0	0	1.82067	0	1.82067	0	0	0	0	0	0	0	1.82067	0	0
1004	TGATTCTTCGAGAGCA.1_1	shNC	0	0	0	2.59234	0	0	0	0	0	0	0	1.97136	0	0	1.97136	0	0	0	3.79016	0	0	0	0	0	2.59234	0	0	1.97136	0	0	0	0	0	0	0	0	0	0	0	0	0	0	0	0	0	0	0
1005	TGATTCTTCTCAGGCG.1_1	shNC	0	0	0	0	0	1.27647	0	0	1.27647	0	0	0	1.27647	0	0	0	0	0	2.8036	0	0	0	0	0	0	1.81937	1.27647	0	0	0	0	0	0	0	0	0	2.8036	0	0	0	0	0	1.27647	0	0	0	0
1006	TGATTTCAGGACGGAG.1_1	shNC	0	0	0	0	0.827531	1.81656	0	0	1.07551	0	0	0	0	0	0	0	0	0	1.07551	0	0.827531	0	0.49703	0	1.27406	0	0.49703	0	0.49703	0	0	0	0	0.49703	0	1.07551	1.43964	0	0.49703	0	0	0	0	0.49703	0.827531	0.49703	0
1009	TGCACGGGTGTCATGT.1_1	shNC	1.54777	0	0	0	0	0	0	0	0	0	0	0	0	0	0	0	0	0	1.54777	0	0	0	0	0	0	0	0	0	0	0	1.54777	0	0	0	1.54777	0	0	0	0	0	0	0	0	0	0	0	0
1011	TGCAGTACACCAGTAT.1_1	shNC	0	0	0.406317	1.10032	0	0	0	0	1.10032	0	1.87396	0.917823	0	0	0.406317	0	0	1.10032	0	0	0	0	0	0.917823	0.406317	0	1.25459	0.694425	0	0.406317	0.694425	0	0.406317	0.406317	0.694425	0.406317	0	0	0.406317	0	0	0	0	0.406317	0	0.406317	0
1012	TGCATGAGTTGCAACT.1_1	shNC	0	0	0	0	0	0	0	0	0	0	0	0	0	0	0	0	0	0	0	0	2.30025	0	0	0	2.30025	0	2.30025	2.30025	0	0	0	0	2.30025	0	0	0	0	0	0	0	0	0	0	0	0	2.30025	0
1014	TGCGATACACATATGC.1_1	shNC	0.546054	0.546054	0.897253	0.546054	0	0.897253	0	0	0	0	1.15666	1.36244	0	0	0	0	0	1.36244	0	0	0	0	0	0.546054	1.36244	0	1.15666	1.15666	0	0	0	0	0	0.897253	0.897253	0.546054	0	0	0.897253	0	0	0	0	0	1.36244	0	0
1016	TGCTCCAGTGGCCACT.1_1	shNC	0	0	0	2.2803	0	0	0	0	0	0	0	0	2.2803	0	0	0	0	0	0	0	0	0	0	0	0	0	2.92097	0	0	0	0	0	0	0	0	0	0	0	0	0	0	0	0	0	0	0	0
1017	TGCTCGTAGTATGACA.1_1	shNC	0	0	0	0	0	0	0	0	0	0	0	0	2.70321	0	0	0	0	0	0	0	0	0	0	0	0	0	2.70321	0	0	0	0	0	0	0	0	0	0	0	0	0	0	0	0	0	0	0	0
1019	TGCTCGTCAGCGAACA.1_1	shNC	0.532384	0.532384	0.877955	0.532384	0.532384	1.50739	0	0	0	0	0	0	0	0	0	0.532384	0	0.532384	1.77849	0	0	0	0.532384	0	1.77849	0	0	0.877955	0.877955	0	0	0	0.532384	0	0.532384	0	1.33814	0	0	0	0	0	0	0	1.50739	0	0
1020	TGCTGAAGTTCAAACC.1_1	shNC	0	0	0	1.41991	0	0	0	0	0	0	0	0	0	0	0	0	0	0	1.41991	0	0	0	0	1.41991	1.41991	0	1.98424	0	0	0	0	0	1.41991	0	0	1.41991	1.41991	0	0	0	0	0	0	0	0	0	0
1022	TGGAACTCAGAATCGG.1_1	shNC	0	0	0	0	0	0	0	0	1.62727	0	0	1.1135	1.1135	0	0	0	0	0	2.41814	0	0	0	0	1.1135	1.96501	0	2.21702	2.5855	0	0	1.1135	0	1.1135	0	0	0	2.41814	0	0	0	0	0	0	0	1.62727	0	0
1023	TGGAGGATCGATAACC.1_1	shNC	0.741011	0.741011	0.741011	0	0.741011	1.16194	0	0	0.741011	0	0	1.16194	0	0	0	0	0	0	1.45726	0	0	0	0	0	2.02661	1.16194	0	1.16194	0.741011	0.741011	0	0	1.16194	0.741011	0.741011	0.741011	1.16194	0	0.741011	0	0	0	0	0.741011	0	0	0
1025	TGGATCATCGCGCCAA.1_1	shNC	0	0	0	0	0	0	0	0	0	0	0	0	0	0	0	0	0	0	1.67246	0	0	0	0	0	1.67246	0	0	0	0	0	0	0	0	0	0	0	1.67246	0	0	0	0	0	0	0	0	0	0
1030	TGGGCTGGTCGCCACA.1_1	shNC	0	0	0	2.39246	0	0	0	0	0	0	0	0	2.03168	0	0	0	0	0	1.46174	0	0	0	0	0	1.46174	0	1.46174	1.46174	0	0	1.46174	0	0	0	0	1.46174	0	0	0	0	0	0	0	0	0	0	0
1031	TGGGTTAAGCAACCAG.1_1	shNC	0	0	0	0	0	1.17299	0	0	1.17299	0	0	0	0	0	0	0	0	0	2.49801	0	0	0	0	0	1.17299	0	1.69805	0	0	0	0	0	0	0	0	1.17299	0	0	0	0	0	0	0	0	1.17299	0	0
1033	TGGGTTATCATTTGGG.1_1	shNC	0.61226	0	0	0.61226	0	0	0	0	0	0	0.98924	1.26237	0	0	0	0	0	0.98924	0	0	0	0	0.98924	0	0.61226	0	1.47668	0	0	0	0	0	0	0	0.61226	1.26237	1.47668	0	0	0	0	0	0	0	0	0	0
1034	TGGTACAGTAGATTGA.1_1	shNC	1.51316	1.51316	0	0	0	1.51316	0	0	0	0	0	1.51316	0	0	1.51316	0	0	0	2.08966	0	0	0	0	0	2.08966	0	0	0	0	0	0	0	1.51316	0	0	2.08966	2.08966	0	0	0	0	0	0	0	1.51316	0	0
1036	TGGTAGTCAAGGCGTA.1_1	shNC	0	0	0	0	0	0	0	0	0	0	0	0	0	0	0	0	0	0	0	0	0	0	0	0	3.15237	1.70079	1.70079	0	0	0	2.29823	0	1.70079	0	0	0	0	0	0	0	0	0	0	1.70079	0	0	0
1037	TGGTAGTTCTGAGGTT.1_1	shNC	0	0.884873	0	2.09352	0	1.34687	0	0	0	0	1.90072	0.884873	0.884873	0.884873	0.884873	0	0	0.884873	0.884873	0	0	0	0.884873	0.884873	1.34687	0	0.884873	0.884873	0	0	1.90072	0	0	0.884873	0	1.34687	0	0	1.34687	0	0	0	0	0	0.884873	0	0
1038	TGGTTAGGTGACCGAA.1_1	shNC	1.45072	1.15608	0	1.15608	0	1.67802	0	0	0.736557	0	0	1.15608	1.15608	0	0	0	0	0	1.15608	0	1.45072	0	0	0.736557	1.45072	0	1.15608	1.8631	1.45072	0.736557	0	0	0.736557	1.15608	0	0.736557	1.45072	0	1.45072	0.736557	0	0	0	0	0	0	0
1040	TGTAAGCAGATGCAGC.1_1	shNC	0	0	0	0	0	0	0	0	0	0	0	0	0	0	1.43753	0	0	0	2.36376	0	0	0	0	0	0	0	0	2.00425	0	0	1.43753	0	0	0	1.43753	0	1.43753	0	1.43753	0	0	0	0	0	0	1.43753	0
1047	TGTAGACTCCGCAAAT.1_1	shNC	0	0	0	1.66739	2.00787	2.00787	0	0	1.14713	0	0	0	0	0	0	0	0	0	2.26141	0	1.14713	0	0	0	2.00787	1.14713	1.14713	1.66739	0	1.14713	1.14713	0	1.14713	0	0	1.14713	0	0	0	0	0	2.26141	0	0	0	0	0
1048	TGTCAGAGTTGCCATA.1_1	shNC	0	0	0	0	0	1.64937	0	0	0.470334	0	0.470334	0.470334	0.470334	0	0	0	0	1.03019	1.03019	0	0	0	0	0	1.38695	0	1.2244	0.470334	0	0	0.470334	0	0	0	0	0.470334	0.788938	0	0	0	0	0	0	0.470334	1.64937	0	0
1049	TGTCCACCACAGTATC.1_1	shNC	0	2.27794	0	2.27794	0	0	0	0	2.27794	0	0	0	0	0	0	0	0	0	2.27794	0	0	0	0	0	2.91848	0	0	0	0	0	0	0	0	2.27794	0	0	2.27794	0	0	0	0	0	0	0	2.27794	0	0
1050	TGTCCCACATGATCTG.1_1	shNC	0	0	0	0	0	0	0	0	0	0	0	1.20753	0	0	0	0	1.20753	0	1.20753	0	0	0	0	0	2.33996	2.08389	0	2.54365	0	0	0	0	0	0	0	1.20753	0	0	0	0	0	0	0	0	1.20753	1.20753	0
1051	TGTCCCATCTGAATCG.1_1	shNC	0	0	0	0.849131	0	1.84853	0	0	0	0	0	0	0	0	0	0	0	0	1.612	0	0	0	0	0	0.849131	0.849131	0	1.30162	0	0	0	0	0.849131	0	0.849131	0.849131	0	0	0	0	0	0	0	0	0.849131	0	0
1052	TGTCCTGGTTAACAGA.1_1	shNC	0	0	1.43973	0	0	0	0	0	0	0	0	1.43973	0	0	0	0	0	0	2.00676	0	0	0	0	0	0	0	1.43973	0	0	0	0	0	0	0	0	0	1.43973	0	2.00676	0	0	0	0	0	2.36638	0	0
1053	TGTGAGTAGAGTCAAT.1_1	shNC	0	1.09609	0.404202	0	0.691253	2.2479	0.691253	0	1.25006	0	0	0.404202	0	0	0	0	0	0	1.25006	0	0	0	0.914017	0	2.29917	0.691253	1.09609	0	1.70165	0	0	0	0	0	0.404202	1.38345	0	0	1.09609	0	0	0	0	0.404202	1.38345	0.404202	0
1056	TGTGCGGGTCTACGAT.1_1	shNC	1.74734	0	0	0	0	1.21481	0	0	1.74734	0	0	0	0	0	0	0	0	0	2.09298	0	0	0	0	0	2.09298	0	0	0	0	0	0	0	0	0	0	0	2.34934	0	0	0	0	0	0	1.21481	1.74734	1.21481	1.21481
1058	TGTGTGATCCATACAG.1_1	shNC	0.85028	0	0	0.85028	0	0	0	0	0.85028	0	0	0.85028	0	0	0	0	0	0.85028	1.30308	0	0	0	0	0	0.85028	0	0	0.85028	0	0	0.85028	0	0	0	0.85028	0	2.20186	0	0	0	0	0	0	0	0	0	0
1061	TGTTCATCAACAACAA.1_1	shNC	0	0	0	0	0	0	0	0	0	0	0	0	0	0	0	0	0	0	0	0	0	0	0	0	0	0	0	0	0	0	0	0	0	0	0	0	0	0	0	0	0	0	0	0	0	0	0
1062	TGTTCATTCCATCTAT.1_1	shNC	0	0	0	0	0.901317	1.68427	0	0	1.36754	0	0	0.901317	0	0	0	0	0	0	1.68427	0	1.36754	0	0	0	0	0	1.36754	0	0	0	0	0	0	0.901317	0.901317	1.36754	0	0	0	0	0	0	0	0	0	0	0
1063	TGTTCCGAGCAGCACA.1_1	shNC	0	0	0	0.976785	0	1.78636	0	0	0	0	0	0	0	0	0.976785	0	0	0	0.976785	0	0.976785	0	0	0	2.03125	0	0.976785	0	0	1.46136	0	0	1.78636	0	0.976785	0.976785	1.46136	0	0	0	0	0	0.976785	0	1.46136	0.976785	0
1070	TGTTGGAAGATACAGT.1_1	shNC	0	0	0	1.47668	0	2.04856	0	0	0	0	0	0	0	0	0	0	0	0	1.47668	0	0	0	0	0	1.47668	0	1.47668	1.47668	0	0	0	0	0	0	0	1.47668	3.20472	0	1.47668	0	0	0	0	0	0	0	0
1071	TGTTGGACACATCCCT.1_1	shNC	0	0	0	0	0	0.87029	0	0	0.380171	0	0.87029	0	0	0	0	0.654962	0	0.654962	0	0	0.380171	0	0	0	0.87029	0	0.654962	0.654962	0	0	0	0	0.380171	0	0	0.380171	0.380171	0	0.87029	0.380171	0	0	0	0	1.04737	0.87029	0
1076	TTACCATAGTCAGAGC.1_1	shNC	0.906299	0.906299	0	0	0	0.906299	0	0	1.37379	0	0	0	0.906299	0	0	0	0	0	1.37379	0	0	0	0	0	2.4271	0	0	0	0.906299	0	0	0	0	0	1.37379	0	0.906299	0	0.906299	0	0	0	0	0	0.906299	0	0
1077	TTACCATCAGAAGTGC.1_1	shNC	0	0	1.08688	0	0	0	0	0	0	0	0	0	0	0	0	0	0	0	2.18156	0	0	0	0	0	0	0	2.69159	0	0	0	1.59535	0	0	0	0	0	2.69159	0	0	0	0	0	0	0	0	1.93081	0
1078	TTACCATGTTTGCAGT.1_1	shNC	0	1.8418	0	0	0	3.31561	0	0	1.2958	0	0	0	0	0	0	0	0	0	1.8418	0	1.2958	0	0	0	0	1.2958	1.2958	2.19297	0	2.19297	0	0	0	0	0	1.2958	1.2958	0	0	0	0	0	0	0	1.8418	0	0
1079	TTACCGCCACACCTAA.1_1	shNC	0	0	0	0	0	0	0	0	0	0	0	0	0	0	0	0	0	0	0	0	0	0	0	0	0	0	0	0	0	0	0	0	0	0	0	0	0	0	0	0	0	0	0	0	0	0	0
1080	TTACCGCCAGGCACAA.1_1	shNC	1.72104	0	0	0	0	0	0	0	0	0	0	0	0	0	1.19245	0	0	0	2.69266	0	0	0	1.19245	0	2.32049	0	1.72104	2.06502	0	0	0	0	0	0	1.19245	1.19245	2.52379	0	0	0	0	0	0	0	0	0	0
1083	TTAGGCAAGGTAGCCA.1_1	shNC	0.381831	0.381831	0	1.33231	0	0.873339	0	0	0	0	0.381831	0.381831	0	0	0.657484	0	0	1.05077	1.44804	0	0	0	0	0	0.873339	0	0.873339	0.381831	0	0.381831	1.05077	0	0.657484	0	0.381831	0	1.05077	0	0.381831	0.381831	0	0	0	0	1.73159	0	0
1086	TTAGGGTCAGCATTGT.1_1	shNC	0.633075	0	0.633075	1.01769	0	0.633075	0	0	0.633075	0	0	0	0	0	1.01769	0	0	0	2.19171	0.633075	0	0	0	0	1.01769	0	1.01769	1.29478	0	0	1.29478	0	0	0	0	0	2.0878	0	0.633075	0	0	0	1.01769	0.633075	0.633075	0.633075	0
1091	TTCAATCGTAACTTCG.1_1	shNC	0.703764	0.703764	0	0	0	0	0	0	0	0	0	0.703764	0	0.703764	0.703764	0.703764	0	0	0.703764	0	0	0	1.40218	0	1.11274	0.703764	1.11274	0	0	0	0.703764	0	0.703764	0	1.40218	0	0	0	1.62637	0	0	0	0.703764	0	1.40218	0.703764	0
1092	TTCACCGCACTTCTCG.1_1	shNC	0	0	0	0	0	1.50917	0	0	0	0	1.01577	0	0	0	1.01577	0	0	0	1.50917	0	0	1.01577	0	0	0	0	1.01577	1.01577	0	0	0	0	1.01577	0	1.01577	1.01577	0	0	1.01577	0	0	0	0	0	1.50917	0	0
1093	TTCACCGGTCGGTACC.1_1	shNC	1.88519	1.05171	0	1.88519	0	0	0	0	0	0	0	1.05171	0	0	0	0	0	0	1.88519	0	0	0	0	0	1.05171	0	1.55289	1.05171	0	0	2.13419	0	1.55289	0	0	1.05171	1.55289	0	1.88519	0	0	0	0	0	1.05171	0	0
1095	TTCACGCCATGCAGGA.1_1	shNC	0	1.54981	0	1.54981	1.54981	0	0	0	0	0	0	0	0	0	0	0	0	0	1.54981	0	0	0	0	0	0	0	1.54981	1.54981	0	0	0	0	0	0	0	1.54981	2.49582	0	0	0	0	0	0	0	2.13075	0	0
1096	TTCACGCGTCAACCAT.1_1	shNC	0	0	0	0	0	0	0	0	0	0	0	0	2.66549	0	0	0	0	0	0	0	0	0	0	0	1.69714	1.69714	1.69714	0	0	0	0	0	0	0	0	1.69714	1.69714	0	2.66549	0	0	0	0	0	0	0	0
1098	TTCATTGAGAGGGTCT.1_1	shNC	0	1.12683	0.348662	0.348662	0	0.811602	0	0	0.348662	0	0.981585	0.606686	0	0	0	0	0	1.25363	0.348662	0	0	0	0.606686	0	1.5591	0	0	0.348662	0	0	0.348662	0	0.606686	0.606686	0	0.981585	0.811602	0	0.981585	0	0	0	0	0	0.606686	0.348662	0
1100	TTCCGTGGTTGATGTC.1_1	shNC	0	0	0	1.18295	0	1.18295	0	0	0	0	0	0	0	0	0	0	0	0	1.18295	0	0	0	0	0	1.18295	0	1.18295	0	1.18295	0	0	0	0	0	0	0	2.30816	0	1.70982	0	0	0	0	0	1.18295	0	0
1102	TTCCTCTCAAACCACT.1_1	shNC	1.31551	0.86007	0.86007	1.86459	0	0	0	0	0	0	0	1.31551	1.31551	0	0	0	0	0.86007	2.21702	0	0	0	0	0	1.62727	0	1.31551	0.86007	0.86007	0	1.31551	0	0.86007	0.86007	0	1.62727	0.86007	0	1.86459	0	0	0	1.31551	0	0.86007	1.62727	0
1103	TTCCTCTTCTTGTGCC.1_1	shNC	1.37854	1.37854	0	0.910096	0	0	0	0	0	0	0	0	0	0	0.910096	0	0	0	1.69629	0	0	0	0	0	2.29328	1.37854	0	1.93705	0	0	0	0	0	0	0.910096	0	0	0	1.93705	0	0	0	0	0	0	1.37854	0
1104	TTCGCTGTCCATCTCG.1_1	shNC	0	0	0	0.770775	0	0	0	0	0	0	0	0	0	0	0	0	0	1.20083	0	0	0	0	0	0	0	0	0	0	0	0	0	0	0	0	0.770775	0	0	0	0.770775	0	0	0	0	0	0	0	0
1105	TTCGGTCAGCGGCTCT.1_1	shNC	1.31481	1.31481	0	0.85952	0	1.86379	0	0	0.85952	0	0	0	0.85952	0	0	0	0	0	2.77148	0	0	0	0	0	1.62651	0	1.62651	0	0	0	1.86379	0	0	0	0	1.62651	2.21617	0	0	0	0	0	0	0	1.62651	0	0
1107	TTCTAACCAGCAGATG.1_1	shNC	0	0	0	0	0	0	0	0	0	0	1.56909	0	2.15229	0	0	0	0	0	1.56909	0	0	0	0	0	0	0	1.56909	1.56909	0	0	0	0	0	0	0	1.56909	2.78557	0	0	0	0	0	1.56909	0	2.78557	0	0
1108	TTCTAACGTGCGGATA.1_1	shNC	0	0	0	0	0	2.16142	0	0	0	0	0	0	0	0	0	0	0	0	0	0	0	0	0	0	1.57727	0	0	1.57727	0	0	0	0	1.57727	0	0	2.16142	2.16142	0	0	0	0	0	0	0	0	0	0
1111	TTCTTCCAGTGAGGCT.1_1	shNC	0.333516	0	0	0	0	1.93701	0	0	0.583184	0	0.583184	0.583184	0	0	0	1.0917	0	0.333516	0.583184	0	0.583184	0	0	0	0.949133	0.333516	0.949133	0.583184	0.782806	0.333516	0	0	0.583184	0.333516	0.782806	0.782806	0.333516	0	0	0	0	0	0	0.333516	1.21646	0.333516	0
1112	TTCTTCCGTACTCCCT.1_1	shNC	1.57211	0	0	1.0676	0	0	0	0	0	0	0	1.0676	1.0676	0	0	0	0	0	1.0676	0	0	0	0	0	1.90586	0	1.0676	0	0	0	1.90586	0	0	0	0	1.90586	2.15566	0	1.0676	0	0	0	0	0	1.90586	1.0676	0
1113	TTCTTGACAGTCACGC.1_1	shNC	0	0	0.796618	0.796618	0	1.23432	0	0	0.796618	0	1.53774	0.796618	0	0	0	0	0	0	1.23432	0	0	0	0.796618	0	0.796618	0	0	1.23432	0.796618	0	0	0	0	0.796618	1.53774	0.796618	0	0	0	0	0	0	0	0	2.25404	0	0
1115	TTGACCCGTTCGGTAT.1_1	shNC	0.525738	0	0	0.868533	0	1.12334	0	0	1.12334	0	0.525738	1.49482	0	0	0	0	0	1.12334	0.525738	0	0.525738	0	0	0	0.868533	0.525738	0.868533	0.525738	0	0	0.868533	0	0.525738	0.525738	0.525738	0.868533	1.12334	0	1.12334	0	0	0	0	0.525738	1.32623	1.32623	0
1118	TTGATGGAGAATCCCT.1_1	shNC	0	0	0	0	0	0	0	0	2.50232	0	0	0	0	0	0	0	0	0	0	0	0	0	0	0	0	0	1.88788	1.88788	0	0	0	0	0	0	0	0	0	0	0	0	0	0	0	0	1.88788	0	0
1119	TTGATGGTCACAACCA.1_1	shNC	0	0	0	1.41825	0	0	0	0	0	0	0	1.98235	0	0	0	0	0	0	1.98235	0	0	0	0	0	1.41825	0	0	0	0	0	1.41825	0	0	0	0	0	3.13154	0	0	0	0	0	0	0	1.41825	0	0
1120	TTGCATTCACTAACCA.1_1	shNC	0	0.841474	0.841474	0	0	2.18815	0	0	1.83723	0	0	0.841474	0	0	1.29186	0	0	0	0.841474	0	0	0	0	0	2.55552	0	2.02801	0.841474	0	0	0	0	0.841474	0	0.841474	1.60127	0	0	1.60127	0	0	0	0	0	1.60127	0	0
1122	TTGCTGCAGTGCTACT.1_1	shNC	0	0	0	0	0	0	0	0	0	0	0	0	0	0	0	0	0	0	2.01404	0	0	0	0	0	1.44615	0	2.374	1.44615	0	0	0	0	0	0	0	1.44615	0	0	0	0	0	0	0	0	0	0	0
1125	TTGGATGAGTATGGCG.1_1	shNC	1.61361	0	0	0	0	0	0	0	0	0	0	0	0	0	0	0	0	0	2.20186	0	0	0	0	0	0	0	1.61361	0	0	0	0	0	1.61361	0	1.61361	0	0	0	1.61361	0	0	0	0	0	0	0	0
1127	TTGGATGGTTGCACGC.1_1	shNC	0	0	0	0.892887	0	0.892887	0.892887	0	0.892887	0	0	0.892887	0	0	0	0	0	0	0	0	0.892887	0	0	0	2.52871	1.91231	0.892887	1.6727	0.892887	0	0.892887	0	0	0	0	1.35695	0.892887	0	0	0	0	0	0	0	0	0	0
1131	TTGTGTTTCGGCACTG.1_1	shNC	0	0	0	1.33262	0	0	0	0	0	0	0	0	0	0	0	0	0	0	2.87615	0	0	0	0	0	0	0	1.33262	0	0	0	0	0	0	0	0	1.33262	1.33262	0	0	0	0	0	0	1.33262	0	0	0
1132	TTGTTGTAGAGATCGC.1_1	shNC	1.82984	0	0	0	0	0	0	0	0	0	0	0	0	0	0	0	0	0	1.82984	0	1.82984	0	0	0	0	0	2.43936	0	0	0	0	0	0	1.82984	0	0	0	0	1.82984	0	0	0	0	1.82984	1.82984	0	0
1134	TTGTTGTTCCACACCT.1_1	shNC	1.88788	0	0	1.88788	0	0	0	0	0	0	0	0	0	0	0	0	0	0	1.88788	0	0	0	0	0	2.50232	0	0	0	0	0	0	0	0	0	0	0	3.15366	0	0	0	0	0	0	0	0	0	0
1135	TTGTTTGGTATTAAGG.1_1	shNC	0	0	0	2.2643	0	1.67001	0	0	0	0	0	1.67001	0	0	0	0	0	0	0	0	0	0	0	0	0	0	1.67001	0	0	0	1.67001	0	0	0	0	1.67001	0	0	1.67001	0	0	0	0	0	1.67001	0	0
1136	TTTACCATCACACGAT.1_1	shNC	1.49412	0	0	1.49412	0	2.06824	0	0	0	0	0	0	0	0	0	0	0	0	2.43065	0	0	0	1.49412	0	2.43065	0	1.49412	2.06824	0	0	0	0	0	1.49412	0	1.49412	0	0	1.49412	0	0	0	0	0	0	0	0
1138	TTTACTGAGGACTATA.1_1	shNC	0	0.956497	0	0	0	0.956497	1.4363	0	0.956497	0	0	0.956497	0	0	0	0	0.956497	0	0.956497	0	1.4363	0	0	0	3.15427	2.00287	0	0.956497	1.75918	0.956497	0	0	0	0	0	0.956497	0	0	0	0	0	0	0.956497	0	0	0.956497	0
1139	TTTACTGTCTGCGAGC.1_1	shNC	0	0	0	0	0	0	0	0	0	0	0	0	0	0	0	0	0	0	2.93352	0	0	0	0	0	0	0	0	0	0	0	3.99601	0	0	0	0	0	0	0	0	0	0	0	0	0	3.99601	0	0
1140	TTTATGCCATGTGCTA.1_1	shNC	0	0	0	0	0	0	0	0	0	0	0	0	1.1175	0	0	0	0	0	2.22232	0	0	0	0	0	1.63206	0	1.97012	0	0	0	1.1175	0	0	0	0	1.1175	1.1175	0	0	0	0	0	0	0	1.1175	0	0
1143	TTTCCTCAGAATCTAG.1_1	shNC	2.48828	0	0	2.86567	0	1.32446	0	0	0	0	0	0	0	0	0	0	0	0	2.48828	0	0	0	0	1.32446	1.32446	0	1.32446	0	0	0	2.22791	0	1.32446	0	1.32446	2.22791	1.32446	0	2.22791	0	0	0	1.32446	1.32446	1.32446	0	0
1144	TTTCCTCTCATTGAGC.1_1	shNC	0	0	0	1.55879	0	2.14078	0	0	0	0	0	0	0	0	0	0	0	0	2.6487	0	0	0	0	0	2.88417	1.05658	1.05658	0	1.05658	2.14078	1.05658	0	1.05658	0	0	1.05658	0	0	1.55879	0	0	0	0	0	2.14078	1.05658	0
1146	TTTGACTCAAGCGCAA.1_1	shNC	0	0	0	0	0	0	0	0	0	0	0	0	0	0	1.32163	0	0	0	0	0	0	0	1.32163	0	0	0	0	0	0	0	0	0	0	0	0	1.87165	1.87165	0	0	0	0	0	0	1.32163	0	1.32163	0
1147	TTTGACTGTAGATGTA.1_1	shNC	0	1.96871	0	0	0	1.96871	0	0	0	0	0	0	0	0	0	0	0	0	1.96871	0	0	0	0	0	0	0	0	0	0	0	1.96871	0	0	0	0	0	0	0	0	0	0	0	0	0	0	0	0
1148	TTTGACTGTCCTTTGC.1_1	shNC	0	0	0	1.57453	0	0	0	0	1.57453	0	0	0	0	0	2.15836	0	0	0	0	0	0	0	1.57453	0	3.00283	0	2.15836	0	0	0	2.15836	0	0	0	0	0	1.57453	0	2.15836	0	0	0	0	0	0	0	0
1150	TTTGGAGCACGTCTCT.1_1	shNC	1.77001	0	0	2.37415	0	0	0	0	0	0	0	0	0	0	0	1.77001	0	0	2.37415	0	0	0	0	0	2.74809	0	0	0	0	0	0	0	0	0	0	0	2.74809	0	0	0	0	0	0	2.37415	1.77001	0	0
1152	TTTGGTTTCAGTGGGA.1_1	shNC	1.95401	0	0	1.95401	0	0	0	0	0	0	0	0	0	0	0	0	0	0	2.95339	0	0	0	0	0	3.22794	0	0	0	0	0	1.95401	0	0	0	0	0	1.95401	0	0	0	0	0	0	1.95401	1.95401	0	0
1	AAACCCAGTGTTAGCT.1_2	shGFPT2	0	0	0	1.10088	0	0	0	0	0	0	0	0	0	0	0	0	0	0	2.40099	0	0	0	0	0	1.10088	0	1.94883	1.61216	0	0	1.61216	0	0	0	0	0	2.20025	0	0	0	0	0	0	0	0	0	0
2	AAACGAAAGCGATGCA.1_2	shGFPT2	0	0	1.67952	0	1.15735	2.47717	0	0	0	0	0	0	0	0	0	0	0	0	3.12742	0	1.67952	0	0	0	3.02692	1.15735	1.15735	1.67952	0	1.15735	1.15735	0	0	0	1.15735	0	2.02082	0	1.15735	0	0	0	0	0	2.02082	0	0
3	AAACGAAGTAGACAGC.1_2	shGFPT2	0.778532	0	0.778532	0	0	0	0	0	0	0	2.92714	0	0	0	0	0	0	1.74276	0	0	0	0	0	0	0	0	0.778532	0	0.778532	0	0.778532	0	0	1.51178	0.778532	1.21091	0	0	1.21091	0	0	0	0	0	1.21091	1.21091	0
4	AAACGCTCAGATCCTA.1_2	shGFPT2	0.679771	1.08074	0	0	0.679771	1.36616	0	0	0.679771	0	0	0.679771	0	0	0	0	0	0	0.679771	0	1.08074	0	0	0	1.36616	0.679771	1.58795	0.679771	0	0	0.679771	0	0	0.679771	0.679771	0	1.08074	0	0.679771	0	0	0	0	0	1.76937	0	0
5	AAAGAACCAAGAGGTC.1_2	shGFPT2	0	0.569177	0.929651	0	0	0	0	0	1.19405	0	0.929651	1.19405	0	0	0	0	0	0	1.57569	0	0	0	0	0	0.569177	0	0.569177	1.19405	0	0	0.569177	0	0.929651	0	0	1.40297	0	0	0	0	0	0	0	0.569177	1.19405	0.569177	0
7	AAAGGATCAAGTTCCA.1_2	shGFPT2	0	0	1.15482	1.15482	0	1.67651	0	0	0	0	0	0	0	0	0	0	1.15482	0	0	0	0	0	0	0	2.01761	0	0	0	1.15482	1.15482	0	0	0	0	0	2.01761	2.01761	0	0	0	0	0	0	0	0	1.15482	0
8	AAAGGTACACGACTAT.1_2	shGFPT2	0	0	0	0	0	0	0	0	2.48466	0	0	1.54024	0	0	0	0	0	0	1.54024	0	0	0	0	0	0	0	2.12003	2.12003	0	0	0	0	1.54024	0	0	0	2.48466	0	0	0	0	0	0	0	1.54024	0	1.54024
9	AAAGGTATCGAGCCTG.1_2	shGFPT2	1.85988	0	0	0	0	0	0	0	0	0	0	0	0	0	0	0	0	0	0	0	0	0	0	0	0	0	1.85988	0	0	0	2.47199	0	0	0	0	0	1.85988	0	2.47199	0	0	0	0	0	1.85988	1.85988	1.85988
13	AACACACAGGACTGGT.1_2	shGFPT2	0	0	0	0	0	0	0	0	0	0	0	0	0	0	0	0	0	0	3.22427	0	0	0	0	0	0	0	0	0	0	0	2.20222	0	2.20222	0	0	0	0	0	0	0	0	0	0	0	0	0	0
14	AACACACCATCGAAGG.1_2	shGFPT2	0	0	0	0	0	2.37326	0	0	0	0	0	0	0	0	0	0	0	0	0	0	0	0	0	0	1.7692	0	0	0	0	0	0	0	2.37326	0	0	1.7692	0	0	0	0	0	0	0	0	0	0	0
19	AACCAACGTGTTGAGG.1_2	shGFPT2	0	0	0	0	0	0	0	0	0	0	0	0	0	0	0	0	0	0	0	0	0	0	0	0	0	0	0	0	0	0	2.60501	0	2.60501	0	0	3.2605	2.60501	0	0	0	0	0	0	0	2.60501	0	0
20	AACCATGAGCTGGCCT.1_2	shGFPT2	0	0.402701	0.402701	0	0	0	0	0	0.91131	0	1.60279	0	0	0	0	0	0.402701	0.402701	0.402701	0	0.402701	0	0	0	1.38006	0.402701	0.91131	0.402701	0	0	0.402701	0	0.402701	0	0	0.91131	0	0	0	0	0	0	0	0	1.86477	0.91131	0
21	AACCCAAGTGAGCTCC.1_2	shGFPT2	0.467869	0	0	0	0	1.02596	0	0	0	0	1.21975	0.78535	0	0	0	0	0	1.38202	0.467869	0	0	0.467869	0	0	1.02596	0	1.38202	0	0	0	0.467869	0	0	0	1.02596	0.78535	1.02596	0	0	0	0	0	0	0.78535	1.02596	0	0
24	AACGAAACAACCGTGC.1_2	shGFPT2	0	0	1.48905	0	0	0	0	0	0	0	0	0	0	0	2.06252	0	0	0	0	0	0	0	0	0	0	0	0	0	0	0	0	0	0	0	0	0	3.07257	0	0	0	0	0	0	0	1.48905	0	0
25	AACGTCAGTACTGGGA.1_2	shGFPT2	0	0	0	0	0	0	0	0	0	0	0	0	0	0	0	0	0	0	1.59865	0	0	0	0	0	2.18523	0	0	1.59865	0	0	0	0	0	0	0	0	1.59865	0	0	0	0	0	2.18523	0	2.18523	0	0
31	AAGATAGCAGTTCCAA.1_2	shGFPT2	0	0	0	0	0	0	0	0	0	0	0	0	1.69423	0	1.69423	0	0	0	1.69423	0	0	0	0	0	0	1.69423	1.69423	1.69423	0	0	0	0	0	0	1.69423	0	0	0	0	0	0	0	0	0	2.29101	0	0
37	AAGCCATTCAGGCGAA.1_2	shGFPT2	0	1.34739	0	1.90133	0	0	0	0	0	0	0	1.34739	0	0	0	0	0	0	1.90133	0	0	0	0	0	2.51685	2.72372	1.90133	2.25572	0	0	0	0	0	1.90133	0	1.90133	2.89504	0	0	0	0	0	0	0	1.90133	0	0
38	AAGCGTTTCCGAGTGC.1_2	shGFPT2	0.511092	0.511092	1.09906	0.847679	0	1.46685	0	0	0.847679	0	1.09906	0.511092	0	0	0.511092	0	0	1.46685	1.09906	0	0	0	0	0	1.46685	1.29977	0	0	0	0.847679	1.09906	0	0	0	1.09906	0	0	0	0.511092	0	0	0	0.847679	0	0.511092	0	0
39	AAGGAATCAATCCAGT.1_2	shGFPT2	1.8291	0	0	0	0	0	0	0	0	0	0	0	0	0	0	0	0	0	2.43857	0	0	0	0	0	1.50086	1.00897	0	1.50086	0	0	1.00897	0	0	0	0	0	2.07582	0	0	0	0	0	0	0	0	0	0
42	AAGGAATTCTGGGCAC.1_2	shGFPT2	0	0.806855	0	0	0	1.24752	0	0	0	0	1.97467	0	0	0	0	0	0	0.806855	0.806855	0	0.806855	0	0	0	1.24752	0	0.806855	0	0	0	0	0	0	0.806855	0	0	1.24752	0	0.806855	0	0	0	0	0	0.806855	1.24752	0
43	AAGGTAAAGACGTCCC.1_2	shGFPT2	1.11847	0	0	0	0	0	0	0	0	0	0	0	0	0	0	0	0	0	1.63322	0	0	0	0	1.11847	0	0	1.63322	0	0	0	1.11847	0	0	0	0	1.11847	0	0	1.11847	0	0	0	0	0	0	0	0
45	AAGTACCAGAGCACTG.1_2	shGFPT2	0.668771	0.668771	0	1.06598	0	0.668771	0	0	0.668771	0	1.7508	1.57015	0	0	0	0.668771	0.668771	0.668771	2.03639	0	0	0	0	0	1.06598	0	1.3495	1.06598	0	0	0.668771	0	0	0	0.668771	0.668771	2.15347	0	0.668771	0	0	0	0	0	1.3495	0	0
47	AAGTGAAAGGGAGGTG.1_2	shGFPT2	0	0	0	1.52431	0	0	0	0	1.52431	0	0	0	0	0	0	0	0	0	2.10217	0	0	0	0	0	2.10217	0	0	0	0	0	1.52431	0	0	0	0	0	2.10217	0	0	0	0	0	0	0	0	0	0
48	AAGTGAAGTCAACACT.1_2	shGFPT2	0	0	0	1.6018	0	0	0	0	0	0	0	0	0	0	1.6018	0	0	0	1.6018	0	0	0	0	0	2.82422	0	0	0	0	0	0	0	0	0	0	0	0	0	0	0	0	0	0	0	0	0	0
51	AATCACGTCTGCTAGA.1_2	shGFPT2	0	0	0	0	0	0	0	0	1.69969	0	0	0	0	0	0	0	0	0	2.6684	0	0	0	0	0	0	0	1.69969	0	0	0	0	0	0	0	0	1.69969	1.69969	0	0	0	0	0	0	0	0	0	0
52	AATCGACAGCTTACGT.1_2	shGFPT2	0	0	0	0	0	0	0	0	0	0	0	0	0	0	0	0	0	0	2.26237	0	0	0	0	0	0	0	0	2.90206	0	0	0	0	0	2.26237	0	0	0	0	0	0	0	0	0	0	0	0	0
53	AATCGTGTCTTCGTAT.1_2	shGFPT2	2.20222	0	0	0	0	0	0	0	0	0	0	0	0	0	0	0	0	0	2.20222	0	0	0	0	0	0	0	2.20222	0	0	0	0	0	0	0	0	2.20222	0	0	0	0	0	0	2.20222	2.20222	0	0	0
55	AATGACCCATCACGGC.1_2	shGFPT2	1.20246	0	0	2.53698	0	0	0	0	0	0	0	0	0	0	0	0	0	0	1.20246	0	0	0	0	0	2.07755	0	1.73282	1.20246	0	0	1.20246	0	0	0	0	0	1.73282	0	1.20246	0	0	0	0	1.20246	1.20246	0	0
56	AATGCCAGTGAAGCGT.1_2	shGFPT2	0	0	0	2.1136	0	0	0	0	0	0	0	0	0	0	0	0	0	0	2.1136	0	0	0	0	0	0	0	0	0	0	0	0	0	2.1136	0	0	0	0	0	0	0	0	0	0	0	2.1136	0	0
57	AATGGAAGTATTGCCA.1_2	shGFPT2	1.17748	0	0	1.17748	0	0	0	0	0	0	0	0	0	0	0	0	0	0	0	0	0	0	0	0	1.17748	0	0	1.17748	0	0	1.17748	0	0	0	0	0	2.04621	0	1.70336	0	0	0	1.17748	0	0	0	0
58	AATGGCTAGCGCTGCT.1_2	shGFPT2	0	0	0	2.9939	0	1.99076	0	0	0	0	0	0	1.99076	0	0	0	0	0	2.9939	0	0	0	0	0	3.48448	0	0	0	0	0	0	0	1.99076	0	0	0	1.99076	0	2.61317	0	0	0	0	0	0	0	1.99076
62	ACAAAGAAGCCAACCC.1_2	shGFPT2	0	0	0.905684	0	0	1.37302	0	0	0	0	0	0	0	0	0	0	0	0	1.37302	0	0.905684	0	0	0	2.12443	1.69026	0.905684	2.12443	2.28663	1.37302	0	0	0	0	0.905684	1.69026	1.69026	0	0	0	0	0	0	0	0.905684	0.905684	0
63	ACAACCAAGCAACCAG.1_2	shGFPT2	0	1.13639	0	1.13639	0	0	1.13639	0	0	0	0	0	0	0	1.13639	0	0	0	1.13639	0	0	0	0	0	2.61689	0	0	1.65461	0	1.13639	0	0	1.13639	0	0	0	2.24729	0	0	0	0	0	0	0	1.13639	0	0
66	ACACGCGAGGGACCAT.1_2	shGFPT2	0.989134	0.989134	0	0	0	2.24543	0	0	0	0	0	0	0	0	0	0	0	0	0	0	0	0	0.989134	0	2.24543	2.24543	0	0	0	0	0	0	0.989134	0.989134	0	0.989134	1.47655	0	0	0	0	0	0	0	0	0	0
68	ACACTGACACCGTACG.1_2	shGFPT2	1.47746	0	0	0	0	1.47746	0	0	0	0	0	0	0	0	1.47746	0	0	0	2.67602	0	0	0	0	0	0	0	1.47746	0	0	0	1.47746	0	1.47746	0	0	1.47746	2.41103	0	0	0	0	0	0	0	1.47746	1.47746	0
74	ACAGAAAGTGTATTCG.1_2	shGFPT2	0	0	0	0	0	0	0	0	0	0	0	0	0	0	0	0	0	0	0	0	0	0	0	0	0	0	0	0	0	0	0	0	0	0	2.47001	0	3.11994	0	0	2.47001	0	0	0	0	2.47001	0	0
75	ACAGCCGAGACTCTAC.1_2	shGFPT2	0	0	0	0	0	0	0	0	0	0	0.938134	0.938134	0	0	0.938134	0	0	0	1.73442	0	0	0	0	0	1.97697	0	2.17203	0.938134	0	0	0.938134	0	0.938134	0	0.938134	0	1.73442	0	0	0	0	0	0.938134	0	1.41353	0	0
80	ACCAAACCATCATTGG.1_2	shGFPT2	0	0.904719	0	0.904719	0	1.37181	0	0	0	0	0	0.904719	0.904719	0	0.904719	0	0	0	2.28518	0	0	0	0	0	0.904719	0	1.37181	0.904719	0	0	0	0	0	0	0	0	2.54709	0	0	0	0	0	0	0	0	0.904719	0
81	ACCAACAAGTGGTTGG.1_2	shGFPT2	0	0	0	0	0	0	0	0	0	0	0	0	0	0	0	0	0	0	0	0	0	0	0	0	0	0	3.2573	0	0	0	0	0	0	0	0	0	0	0	0	0	0	0	0	0	0	0	0
84	ACCACAATCTCAAAGC.1_2	shGFPT2	0	0	0	0	0	0	0	0.952665	0	0	0	0.952665	0	0	0	0	0	0	2.73004	0	0	0	0	0	1.43156	0	1.43156	0	0	0	0	0	0	0	0.952665	0.952665	0	0	0.952665	0	0	0	0	0.952665	1.75403	0	0
87	ACCCTTGAGTTTGCTG.1_2	shGFPT2	1.7993	0	0	0	0	1.7993	0	0	0	0	0	0	0	0	0	0	0	0	1.7993	0	0	0	1.7993	0	1.7993	0	0	0	0	0	2.40612	0	0	1.7993	0	0	0	0	0	0	0	0	0	0	0	1.7993	0
91	ACCGTTCGTACCCGCA.1_2	shGFPT2	0	0	0	2.06162	0	0	0	0	0	0	0	0	0	0	0	0	0	0	3.07159	0	0	0	0	0	0	0	2.68903	0	0	0	0	0	2.06162	0	0	0	2.06162	0	2.06162	0	0	0	0	0	2.06162	0	0
92	ACCTACCAGTGGCAGT.1_2	shGFPT2	0	0	0	1.60243	0	0	0	0	0	0	0	0	1.60243	0	0	0	0	0	1.60243	0	0	0	0	0	2.82497	0	0	0	0	0	0	0	1.60243	0	0	0	2.18944	0	0	0	0	0	0	0	0	0	0
93	ACCTGAAGTACACGCC.1_2	shGFPT2	1.2351	1.2351	0	1.2351	0	0	0	0	0	0	0	0	0	0	0	0	0	0	2.1182	0	0	0	0	0	0.79722	0	1.53861	0.79722	0	0	2.1182	0	0	0.79722	1.2351	0.79722	0.79722	0	0	0.79722	0	0	0.79722	0	1.2351	0	0
94	ACCTGAATCTCGTGAA.1_2	shGFPT2	0	0	0	0	0	0	0	0	0	0	0	0	0	0	0	0	0	0	0	0	0	0	0	0	0	0	2.25699	0	0	0	0	0	0	0	0	0	2.25699	0	0	0	0	0	0	0	0	0	0
96	ACGATGTAGCTACAAA.1_2	shGFPT2	1.88741	0	0	0	0	1.88741	0	0	0	0	0	0	0	0	0	0	0	0	2.5018	0	0	0	0	0	2.5018	0	1.88741	0	0	0	0	0	0	0	0	0	3.15312	0	0	0	0	0	0	0	1.88741	0	0
97	ACGGAAGTCGGACAAG.1_2	shGFPT2	0	0	0	0	0	0	0	0	0	0	0	0	0	0	0	0	0	0	1.92595	0	0	0	0	0	1.92595	0	0	0	0	0	0	0	0	0	0	0	2.54344	0	0	0	0	0	0	0	0	0	0
99	ACGGTCGTCGTAACTG.1_2	shGFPT2	0	0	0	1.52066	0	0	0	0	0	0	0	1.52066	0	0	1.52066	0	0	0	2.09808	0	0	0	0	0	0	0	0	1.52066	0	1.52066	0	0	0	0	0	1.52066	0	0	0	0	0	0	0	0	0	0	0
101	ACGTAACAGAAATCCA.1_2	shGFPT2	0	0	0	0	0	0	0	0	0	0	0	0	0	0	0	0	0	0	2.86126	0	0	0	0	0	0	0	0	0	0	0	0	0	0	0	1.87096	0	2.48399	0	0	0	0	0	0	0	1.87096	0	0
105	ACGTAGTGTCTGTGCG.1_2	shGFPT2	0	0	0	0	0	1.1033	0	0	1.1033	0	1.1033	1.1033	0	0	0	0	0	0	1.1033	0	0	0	0	0	2.20347	1.1033	1.1033	0	1.1033	0	0	0	0	0	0	1.61506	0	0	1.1033	0	0	0	0	0	1.1033	0	0
108	ACTATCTCAGATGCGA.1_2	shGFPT2	0	0	1.25977	1.79993	0	0	0	0	2.14872	0	0	0	0	0	1.25977	0	0	0	2.92704	0	0	0	0	0	2.14872	2.14872	1.79993	1.79993	1.25977	0	0	0	0	0	0	0	0	0	0	0	0	1.25977	0	0	2.40681	0	0
109	ACTATGGAGTGAGCCA.1_2	shGFPT2	0	0.718961	0	0	0	0	0	0	0	0	0	0	0	0	0.718961	0	0	0	1.13288	0	0.718961	0	0	0	0.718961	0	1.13288	1.13288	0	0	0.718961	0	0.718961	0	1.13288	1.13288	1.65043	0	0	0	0	0	0	0	1.42477	0	0
111	ACTCCCATCTAGTGAC.1_2	shGFPT2	0	0	1.84493	0	0	0	0	0	0	0	0	0	0	0	0	0	0	0	3.49547	0	0	0	0	0	2.45576	0	1.84493	1.84493	0	0	0	0	0	0	0	0	0	0	0	0	0	0	0	0	2.83221	0	0
112	ACTCTCGCAAGCTCTA.1_2	shGFPT2	1.23088	0	0	1.23088	0	0	0	0	0	0	0	0	0	0	0	0	0	0	2.57423	0	0	0	0	0	0	0	2.11296	0	0	0	0	0	0	1.23088	1.23088	0	0	0	0	0	0	0	0	0	0	0	0
113	ACTCTCGGTATCGAAA.1_2	shGFPT2	0	0	0	0	0	0	0	0	0	0	0	1.93654	1.3781	0	0	0	0	0	1.3781	0	0	0	0	0	0	0	0	1.3781	0	0	0	0	0	1.3781	0	1.3781	1.93654	0	2.29274	0	0	0	0	0	0	0	0
114	ACTCTCGGTTAAACCC.1_2	shGFPT2	2.50955	0	0	2.50955	0	0	0	0	0	0	0	0	0	0	0	0	0	0	2.50955	0	0	0	0	0	2.50955	0	0	0	0	0	3.1612	0	0	0	0	0	2.50955	0	2.50955	0	0	0	0	0	0	0	0
115	ACTGATGAGGAAAGGT.1_2	shGFPT2	0	0	0	0	0	1.92096	0	0	0	0	0	0	0	0	0	0	0	0	0	0	1.92096	0	0	0	1.92096	1.92096	1.92096	0	0	1.92096	0	0	0	0	0	0	2.53805	0	1.92096	0	0	0	0	0	0	1.92096	0
120	ACTTAGGAGGGTGGGA.1_2	shGFPT2	0	0	0	2.59463	0	0	0	0	0	0	0	0	0	0	0	0	0	0	2.59463	0	0	0	0	0	0	0	0	0	0	0	0	0	2.59463	0	0	0	2.59463	0	2.59463	0	0	0	2.59463	0	0	2.59463	0
123	ACTTTCATCCGTGGGT.1_2	shGFPT2	1.53194	0	0	0	0	0	0	0	0	0	0	2.47497	0	0	0	0	0	0	1.53194	0	0	0	0	0	0	0	2.11073	0	0	0	2.47497	0	1.53194	0	0	1.53194	2.11073	0	0	0	0	0	0	0	1.53194	0	0
124	AGAACAAGTTGATGTC.1_2	shGFPT2	0	0	0	0	0	0	0	0	1.84898	0	0	0	0	0	0	0	1.84898	0	0	0	0	0	0	0	0	0	0	0	0	0	0	0	0	0	0	0	1.84898	0	0	0	0	0	0	0	1.84898	0	0
126	AGAAGTATCGCGTGCA.1_2	shGFPT2	0	0	0	2.42939	0	0	0	0	0	0	1.82067	0	0	0	0	0	0	0	1.82067	0	0	0	0	0	1.82067	0	0	0	0	0	0	0	0	0	0	0	2.42939	0	0	0	0	0	0	0	0	0	0
127	AGACAAAAGAGGTTTA.1_2	shGFPT2	0	0	0	0.651514	0.651514	2.4072	0.651514	0	1.04271	0	0	0.651514	0	0	0	0	0	0	2.62888	0	0	0	0	0	0	0.651514	1.72137	0	0	0.651514	0	0	0	0	0	0	1.04271	0	0.651514	0.651514	0	0	1.04271	0.651514	1.04271	0	0
128	AGACACTGTTTCACAG.1_2	shGFPT2	0	0	0	0	0	0	1.81247	0	0	0	0	0	0	0	0	1.81247	1.81247	0	0	0	0	0	0	0	1.81247	1.81247	0	0	0	0	0	0	0	0	0	0	0	0	0	0	0	0	0	0	0	0	0
129	AGACAGGCAAACTCGT.1_2	shGFPT2	0	0.976682	0.976682	0	0	0.976682	0	0	0	0	0	0.976682	0	0	0	0	0	0	2.53286	0	0.976682	0	0	0	2.22766	0	0	0	0	0	0	0	0.976682	0	0.976682	0	1.46123	0	0.976682	0	0	0	0	0	0	1.46123	0
130	AGACCATCAATGTCAC.1_2	shGFPT2	0	0	0	0.988498	0	0	0	0	0	0	0	1.47577	0	0	0	0	0	0	1.80197	0	0	0	0	0	0	0	0.988498	1.47577	0	0	1.47577	0	0	0	0.988498	2.04753	1.47577	0	0	0	0	0	0	1.80197	0.988498	0	0
131	AGACCATCACAGTATC.1_2	shGFPT2	0	1.03668	1.53464	0	1.03668	0	0	0	1.86555	0	0	0	0	0	1.03668	0	0	0	1.03668	0	0	0	0	0	1.53464	2.31245	1.03668	1.86555	0	0	0	0	0	0	0	1.53464	1.03668	0	0	0	0	0	0	0	0	1.03668	0
133	AGACTCAAGCGAATGC.1_2	shGFPT2	0.722758	1.1379	0.722758	0.722758	0	0	2.24928	0	0.722758	0	0	0	0	0	0	0.722758	0	0	2.76263	0	1.1379	0.722758	0	0	1.84064	0	0	1.1379	0	0	0	0	0	0	0	0	1.1379	0	0.722758	0	0	0	0	0.722758	1.43039	0	0
136	AGACTCACACCGGAAA.1_2	shGFPT2	0	0	0	0	0	2.15701	0	0	0	0	0	0	0	0	0	0	0	0	2.15701	0	0	0	0	0	0	1.57332	0	2.52316	0	0	0	0	0	0	0	0	0	0	0	0	0	0	0	0	0	0	0
138	AGAGAATAGCGGTATG.1_2	shGFPT2	0	0	0	0	0	0	0	0	0	0	0	0	0	0	0	0	0	0	2.26135	0	0	0	0	0	1.35205	0	1.35205	1.35205	0	0	1.35205	0	0	0	0	1.35205	1.90667	0	0	0	0	0	0	1.35205	0	1.35205	0
139	AGAGAATGTGCCGTTG.1_2	shGFPT2	1.60688	1.60688	0	0	0	0	0	0	0	0	0	0	0	0	1.60688	0	0	0	2.19439	0	0	0	0	0	0	0	0	0	0	0	0	0	0	0	0	0	0	0	0	0	0	0	0	0	1.60688	1.60688	0
141	AGAGCCCTCTCGTCAC.1_2	shGFPT2	0	0	0	0	0.591221	1.44096	0	0	0.960263	0	0	0.960263	0	0	0	0	0.591221	0	0.591221	0	0.591221	0.591221	0	0	0.960263	0	1.61561	1.76424	0.960263	0.591221	0.591221	0	0	0	0.591221	0	0	0	0	0	0	0	0	0	2.00815	1.22922	0
142	AGATAGATCTGCGTCT.1_2	shGFPT2	0	0	0	1.63123	0	0	0	0	0	0	0	0	1.63123	0	0	0	0	0	2.59005	0	0	0	0	0	2.22141	0	0	0	0	0	2.59005	0	0	0	0	0	2.22141	0	0	0	0	0	0	0	1.63123	0	0
145	AGCCAATCACGATAGG.1_2	shGFPT2	1.32588	0	0	0	0	1.32588	0	0	0	0	0	1.32588	1.32588	0	0	0	0	0	3.01349	0	0	0	0	0	1.32588	0	1.87656	0	0	0	1.32588	0	0	0	0	1.32588	1.87656	0	1.32588	0	0	0	0	1.32588	1.87656	0	0
146	AGCCACGAGCGTACAG.1_2	shGFPT2	1.64593	0	0	0	0	1.12912	0	0	0	0	0	0	0	0	0	0	0	0	1.12912	0	0	0	0	0	1.98496	0	1.98496	0	0	0	1.12912	0	0	0	0	0	1.64593	0	1.12912	0	0	0	0	1.64593	0	0	0
148	AGCGATTCATCTGTTT.1_2	shGFPT2	0	0	0	2.37724	0	0	0	0	0	0	0	0	0	0	1.44889	0	0	0	1.44889	0	0	0	0	0	2.01714	0	0	0	0	0	0	0	1.44889	0	0	1.44889	2.01714	0	1.44889	0	0	0	0	1.44889	1.44889	0	0
149	AGCGATTGTGATTCAC.1_2	shGFPT2	0	0	0	0	0	2.49344	0	0	0	0	1.54777	0	0	0	0	0	0	0	2.12846	0	0	0	0	0	1.54777	0	0	0	0	0	0	0	0	1.54777	1.54777	0	2.76025	0	0	0	0	0	0	0	2.12846	0	0
150	AGCGATTGTTCAAGTC.1_2	shGFPT2	0	0	0	0	0	1.20973	0	0	0.578965	0	0.943276	0.578965	0	0	0	0.578965	0	0.578965	0	0	0	0	0	0	1.20973	0	0.943276	0	0	0	1.20973	0	0	0	0.578965	0.943276	0	0	0.578965	0.578965	0	0	0	0	0.943276	0	0
154	AGCGTATGTCGAATGG.1_2	shGFPT2	0	1.45895	0	0	0	2.02852	0	0	0	0	0	1.45895	0	0	0	0	0	0	1.45895	0	2.02852	0	0	0	1.45895	0	0	2.02852	0	0	0	0	0	0	0	1.45895	1.45895	0	0	0	0	0	0	0	0	0	0
155	AGCTCAAAGCACGATG.1_2	shGFPT2	0	1.88078	0	2.8722	0	0	0	0	0	0	0	0	0	0	0	2.49463	0	0	1.88078	0	0	0	0	0	2.49463	0	1.88078	1.88078	0	0	0	0	0	0	0	1.88078	0	0	1.88078	0	0	0	0	0	0	0	0
156	AGCTCAATCTGAGGTT.1_2	shGFPT2	0	0	0	1.41683	0	0	0	0	0	0	0	0	0	0	0	0	0	1.41683	0	0	0	0	0	0	0	0	0	0	0	0	0	0	0	0	1.41683	1.98073	1.98073	0	0	0	0	0	0	0	2.33912	1.41683	0
157	AGGAAATCAATGGCCC.1_2	shGFPT2	2.08378	0	0	1.50794	0	1.50794	0	0	0	0	0	1.50794	0	0	0	0	0	0	2.44688	0	0	2.08378	0	2.08378	0	0	0	0	0	0	2.08378	0	0	0	0	0	0	0	0	0	0	0	0	0	0	1.50794	0
161	AGGATAAAGGGACTGT.1_2	shGFPT2	0	0	0	2.4631	0	0	0	0	0	0	0	0	0	0	0	0	0	0	3.50325	0	0	0	0	0	0	0	0	0	0	0	0	0	0	0	0	0	0	0	0	0	0	0	0	0	0	0	0
162	AGGCCACGTATCGAGG.1_2	shGFPT2	0	0	0	0	0	1.92245	0	0	0	0	0	0	0	0	0	0	0	0	1.92245	0	0	0	1.92245	0	0	0	0	0	0	0	1.92245	0	0	0	0	0	0	0	0	0	0	0	0	0	0	0	0
164	AGGCCACTCTGAGGTT.1_2	shGFPT2	0	0	0	0	0	0	2.51895	0	0	0	0	0	0	0	0	0	0	2.51895	0	0	0	0	0	0	0	0	0	2.51895	0	0	0	0	0	0	0	0	0	0	0	0	0	0	0	0	0	0	0
165	AGGCTGCGTATCATGC.1_2	shGFPT2	2.59577	0	0	2.59577	0	0	0	0	0	0	0	0	0	0	0	0	0	0	2.59577	0	0	0	0	0	0	0	1.63621	1.63621	0	0	0	0	0	1.63621	0	0	0	0	0	0	0	0	0	0	1.63621	0	0
167	AGGCTGCTCTTCCAGC.1_2	shGFPT2	0.644384	0	0	0	0	1.53023	0	0.644384	1.03305	0	1.03305	0.644384	0	0	0	0.644384	0.644384	1.53023	0.644384	0	0.644384	0	0	0	1.31223	0.644384	1.31223	1.03305	0.644384	0	0.644384	0	0.644384	0	1.31223	0	1.03305	0	0.644384	0	0	0	0	1.31223	1.70911	1.70911	0
169	AGGGCCTCAGAAGTGC.1_2	shGFPT2	1.47694	1.47694	0	2.04886	0	0	0	0	0	0	0	1.47694	0	0	1.47694	0	0	0	2.67539	0	0	0	0	0	1.47694	0	1.47694	0	0	0	0	0	0	1.47694	0	2.04886	1.47694	0	0	0	0	0	0	0	0	0	0
171	AGGGTCCCATACAGGG.1_2	shGFPT2	0	1.73493	0	1.73493	0	1.73493	0	0	0	0	0	1.73493	0	0	0	0	0	1.73493	0	0	0	0	0	0	2.33574	0	0	0	0	0	1.73493	0	0	0	0	0	1.73493	0	0	0	0	0	0	0	0	0	0
174	AGGGTGATCGAAACAA.1_2	shGFPT2	0	0	0	0	0	0	0	0	0	0	0	0	0	0	0	0	0	0	0	0	0	0	0	0	0	0	0	0	0	0	2.58948	0	0	0	1.96871	0	0	0	1.96871	0	0	0	0	0	0	2.58948	0
175	AGGGTGATCTAGTACG.1_2	shGFPT2	0	0	0	0	0	2.49514	0	0	2.49514	0	0	0	0	0	0	0	0	0	4.03632	0	0	0	0	0	3.14617	3.14617	0	0	0	0	0	0	0	0	0	0	2.49514	0	0	0	0	0	0	0	2.49514	0	0
180	AGGTAGGAGCGTTACT.1_2	shGFPT2	0	0	0.528782	0	0	0.872852	0	0	0	0	0.528782	0.528782	0	0	0	0.528782	0	0.528782	0.872852	0	0	0	0	0	0.872852	0	0.528782	0	0	0	1.33169	0	0	0.528782	1.12836	0.872852	1.12836	0	0.528782	0.528782	0	0	0	0	0.872852	0.528782	0
181	AGGTCTAAGATCACTC.1_2	shGFPT2	0	0	1.25348	1.25348	0	1.25348	0	0	1.25348	0	0	0	0	0	0	0	0	0	2.60362	0	0	0	0	0	1.25348	0	0	0	0	0	0	0	0	0	0	1.25348	2.77353	0	0	0	0	0	1.25348	0	1.25348	0	0
184	AGGTTACAGGAGAGGC.1_2	shGFPT2	0	1.12813	1.12813	0	0	0	0	0	0	0	1.12813	1.64475	0	0	0	0	0	1.12813	0	0	1.12813	0	0	0	1.64475	0	0	0	0	0	0	0	0	0	0	1.64475	0	0	0	0	0	0	0	0	0	1.12813	0
185	AGGTTACGTCGTCTCT.1_2	shGFPT2	0	0	0	0	0	0	0	0	0	0	2.47797	0	0	0	0	0	0	0	0	0	0	0	0	0	2.47797	2.47797	2.47797	0	0	0	0	0	0	0	0	0	0	0	0	0	0	0	0	0	0	0	0
186	AGGTTACGTGACTCGC.1_2	shGFPT2	0	0	0	0	0	0	0	0	0	0	0	0	0	0	0	0	0	0	3.03317	0	0	0	0	0	0	0	0	0	0	0	0	0	0	0	0	2.02652	0	0	0	0	0	0	0	0	0	2.02652	0
188	AGGTTGTCAAATTGCC.1_2	shGFPT2	0	2.22619	0	0	0	0	0	0	0	0	0	1.32304	0	0	1.32304	0	0	0	2.22619	0	0	0	0	0	1.32304	0	0	1.32304	0	0	0	0	0	0	1.32304	0	1.87328	0	0	0	0	0	0	0	0	0	0
191	AGTACCATCATAAGGA.1_2	shGFPT2	1.40534	0	0	1.96765	0	1.96765	0	0	0	0	0	1.40534	0	0	0	0	0	0	1.96765	0	0	0	0	0	2.3254	0	1.40534	1.96765	0	0	0	0	0	0	0	0	1.40534	0	0	0	0	0	0	0	0	1.40534	0
192	AGTACTGGTGTTCGAT.1_2	shGFPT2	0	0.494322	0	0	0	0.823637	0	0	1.07095	0	0.494322	0.823637	0	0	0	0	0	0.494322	0.494322	0	0	0	0	0	0	0	0.494322	1.07095	0	0	0	0	0	0.494322	1.07095	0	0	0	0	0.494322	0	0	0	0	0.823637	0.494322	0
193	AGTCAACCAACGACTT.1_2	shGFPT2	0	0	0	1.05646	0	0	0	0	0	0	0	1.89138	0	0	0	0	0	0	2.33996	0	0	0	0	0	1.05646	0	0	1.05646	0	0	0	0	1.05646	0	1.05646	1.05646	1.05646	0	0	0	0	0	0	1.05646	0	0	0
197	AGTCTCCGTTCTCTCG.1_2	shGFPT2	0	0	0	1.95245	0	0	0	0	0	0	0	2.57199	0	0	0	0	0	0	2.95167	0	0	0	0	0	3.44137	0	0	0	0	0	0	0	0	0	0	0	2.57199	0	1.95245	0	0	0	0	0	1.95245	0	0
198	AGTGACTTCCATTGGA.1_2	shGFPT2	0	0	0	0	0	0	0	0	0	0	0	0	0	0	0	0	0	0	2.63974	0	0	0	0	0	0	0	1.67457	0	0	0	0	0	0	0	0	0	0	0	0	0	0	0	0	1.67457	1.67457	0	0
199	AGTGATCAGCACCTGC.1_2	shGFPT2	0	0	0	1.01633	0	1.01633	0	0	0	0	0	0	0	0	0	0	0	0	1.01633	0	0	0	0	0	2.44913	0	1.50986	0	0	0	0	0	0	0	0	1.01633	1.83882	0	0	0	0	0	0	0	1.50986	0	0
200	AGTGATCTCACGGGAA.1_2	shGFPT2	0	0	0	0	0	1.55657	0	0	0	0	0	0	0	0	0	0	0	0	2.50369	0	0	0	0	0	2.1383	0	0	0	0	0	0	0	0	0	0	1.55657	2.77072	0	1.55657	0	0	0	0	0	0	0	0
202	AGTGTTGTCCACAAGT.1_2	shGFPT2	0.70428	0	0	0	0	1.11343	0	0	1.40295	0	3.06562	1.11343	0	0	0	0	0.70428	0.70428	1.11343	0	0.70428	0	0	0	0.70428	0	1.40295	0	0	0	0.70428	0	0	0	0	0	1.11343	0	0	0	0	0	0.70428	0.70428	0.70428	0	0
206	ATACCTTTCGTAGCTA.1_2	shGFPT2	0	0	0	0.658673	0	0.658673	0	0	1.05238	0	2.13509	1.05238	0	0	0	0	0	0.658673	0.658673	0	0	0	0.658673	0	1.33413	0	0	1.05238	0	0	0.658673	0	0	0	0.658673	1.05238	1.05238	0	0.658673	0	0	0	0	0	1.55369	1.05238	0
207	ATACTTCTCAATGCAC.1_2	shGFPT2	1.06237	0	0	0	1.06237	0	0	0	0	0	0	0	0	0	0	0	0	0	2.65694	0	0	1.06237	0	0	1.06237	0	0	0	0	0	0	0	1.06237	0	0	1.06237	1.56579	0	0	0	0	0	0	0	1.56579	1.06237	0
210	ATAGAGAAGCGATTCT.1_2	shGFPT2	1.2648	0	0	0	0	0.991367	0	0	0.991367	0	1.2648	0.61381	0	0.61381	0	0	0	0	0.991367	0	0	0	0	0	0.61381	0	1.2648	0.61381	0	0	0.61381	0	0	0.61381	1.2648	0.61381	0.61381	0	0.61381	0	0	0	0	0	0.991367	0	0
215	ATATCCTTCGCCACTT.1_2	shGFPT2	0	1.38122	0	1.38122	0	1.9401	0	0	0	0	0	1.38122	1.38122	0	0	0	0	0	2.5587	0	0	0	0	0	0	0	0	1.38122	0	0	1.38122	0	1.38122	0	0	0	2.5587	0	0	0	0	0	0	0	2.29649	0	0
216	ATCACAGGTGGGTCAA.1_2	shGFPT2	0.714565	0.714565	0	0	0	0	1.64349	0	0.714565	0	0	1.12707	0	0	0	0	0	0	1.98235	0	0.714565	0.714565	0	0	0.714565	0.714565	1.41825	0.714565	0.714565	0	0	0	0	0	0.714565	0.714565	2.11663	0	0	0	0	0	0	0.714565	1.41825	0	0
217	ATCACGAAGCTCCATA.1_2	shGFPT2	1.28068	0	0	0.832711	0	0.832711	0	0	0	0	0	0	0	0	0	0.832711	0	0	2.72753	0	0.832711	0	0	0	0	0	1.58896	0	0	0	0	0	0	1.28068	0	0	1.82426	0	0	0	0	0	0	0.832711	0	0	0
218	ATCACGAAGTCATCGT.1_2	shGFPT2	2.18103	0	0	0	0	0	0	0	0	0	0	0	0	0	0	0	0	0	2.18103	0	0	0	0	0	0	0	2.81606	0	0	0	0	0	0	0	0	0	2.81606	0	0	0	0	0	2.18103	0	2.18103	0	0
219	ATCACGACAAGGCTTT.1_2	shGFPT2	0	0	0	2.70581	0	0	0	0	0	0	0	2.70581	0	0	0	0	0	0	0	0	0	0	0	0	2.70581	0	0	0	0	0	0	0	0	0	0	0	0	0	0	0	0	0	0	0	0	0	0
220	ATCACGAGTTCTAACG.1_2	shGFPT2	0.879643	0.879643	0	2.2471	0	1.34027	0	0	0	0	0	0	0	0	0	0	0	0	2.0857	0	0	0	0	0.879643	0	0	0.879643	0	0	0	0.879643	0	0.879643	0	0	0	0	0	0	0	0	0	0	0	0	0	0
222	ATCAGGTCAGTGACCC.1_2	shGFPT2	0	0	0	1.41282	0	0	0	0	1.41282	0	0	0	1.97617	0	0	0	0	0	0	0	0	0	0	0	1.41282	0	0	1.41282	0	0	0	0	0	0	0	0	0	0	0	0	0	0	1.41282	0	0	0	0
227	ATCCCTGAGTGGAATT.1_2	shGFPT2	0	0.614745	0	1.26626	0	1.26626	0	0	0.614745	0	0.992648	0.614745	0.614745	0.614745	0	0	0	0.614745	0	0	0	0	0	0	0.992648	0	1.48086	0.614745	0.614745	0	0	0	0.614745	0	1.26626	0.992648	0.992648	0	0.992648	0	0	0	0	0	0.614745	0.614745	0
229	ATCCGTCAGGGAGGTG.1_2	shGFPT2	0	0	0	0	0	0.55998	0	0	0	0	0	0.55998	0	0	0	0.55998	0	2.04843	0.916801	0	0	0	0	0	1.17924	0	0.55998	0.916801	0	0	0.55998	0	0	0	0	0	0	0	0.55998	0	0	0	0	0	0	0	0
235	ATCGGCGTCAGCTAGT.1_2	shGFPT2	0	0	0	0	0	0	0	0	2.01573	0	0	0	0	0	0	0	0	0	2.01573	0	0	0	0	0	0	0	2.01573	0	0	0	0	0	0	0	0	2.01573	0	0	0	0	0	0	0	0	2.01573	0	0
236	ATCGGCGTCCCAAGTA.1_2	shGFPT2	0.648799	0.648799	0	1.03903	0	1.03903	0.648799	0	1.03903	0	0	0	0	0	0.648799	0	0	0	0	0	0.648799	0	0.648799	0	1.53751	1.31901	0.648799	0.648799	0	0.648799	0	0	0	0	0	1.03903	0	0	0.648799	0.648799	0	0	0	0	0	0	0
237	ATCGTGAAGTTGTACC.1_2	shGFPT2	0	0	0	0	0	0	0	0	0	0	0	0	0	0	0	0	0	0	0	0	0	0	0	0	3.1558	0	0	0	0	0	0	0	0	0	0	0	0	0	0	0	0	0	0	0	0	0	0
238	ATCTCTACACCCTTGT.1_2	shGFPT2	1.15825	0	0	0	0	0	0	0	0	0	0	1.15825	0	0	0	0	0	0	1.15825	0	0	0	0	0	0	0	1.15825	0	0	1.15825	1.68059	0	0	0	0	0	1.68059	0	0	0	0	0	0	1.68059	1.15825	2.02196	0
239	ATCTCTACACTGGATT.1_2	shGFPT2	0.453235	0	0	0	0	0.763973	0	0	0.453235	0	0.453235	0	0.453235	0	0	0	0	0.763973	0.453235	0	0.453235	0	0	0	1.49074	0.763973	0	1.0007	0	0.453235	0.453235	0	0	0	1.0007	0	0	0	0	0	0	0	0	0	1.0007	0	0
242	ATGAAAGGTTAGAAAC.1_2	shGFPT2	0	0.88279	0.535802	0	0	0.535802	0	0	0	0	1.78536	1.1399	0	0	0.535802	0.88279	0	0	0.88279	0	0	0	0	0.535802	0	0	1.1399	0.88279	0	0	0	0	0.535802	0	0.535802	0.535802	0.88279	0	0.535802	0	0	0	0	0	0	0.88279	0
243	ATGAAAGGTTCGGTAT.1_2	shGFPT2	0	1.18626	0	0	0	0	0	0	0	0	0	1.71372	0	0	0	0	0	0	1.71372	0	0	0	0	0	1.18626	2.68436	1.71372	1.18626	0	0	1.18626	0	0	0	0	0	0	0	1.71372	0	0	0	0	0	1.71372	0	0
245	ATGACCAGTCAATCTG.1_2	shGFPT2	0	0	0	0	0	0	0	0	0	0	0	1.84224	2.45284	0	0	0	0	0	3.31612	0	0	0	0	0	0	0	0	0	0	0	0	0	0	0	0	0	0	0	1.84224	0	0	0	0	0	2.45284	1.84224	0
246	ATGACCATCAAAGACA.1_2	shGFPT2	0	0	0	0	0	0	0	0	0	0	0	1.73686	0	0	0	0	0	0	2.33785	0	0	0	0	0	0	0	1.73686	1.73686	0	0	2.71061	0	0	0	0	0	1.73686	0	0	0	0	0	0	0	2.71061	0	0
247	ATGACCATCACTTGGA.1_2	shGFPT2	0.827133	0.27891	0.496753	0	0	0.958753	0	0	0.827133	0.675525	1.70541	0	0	0	0	0.496753	0	1.27355	0.958753	0	0.675525	0	0.27891	0.27891	1.51261	0.496753	0.958753	0.675525	0.27891	0.675525	0.27891	0	0.496753	0	0.958753	0.496753	1.07505	0	0.827133	0.27891	0	0	0	0.27891	0.958753	0.675525	0
248	ATGAGGGAGCATGCAG.1_2	shGFPT2	0	0	0	0	0	1.14937	0	0	0.830174	0	0.621908	0.621908	0	0	0	0	0	0.830174	0	0	0.621908	0	0	0	0.621908	0	1.00245	0.35854	0	0	0	0	0	0	1.00245	0	0.35854	0	0.35854	0.35854	0	0	0	0.35854	1.27744	1.00245	0
249	ATGAGGGGTTGTCAGT.1_2	shGFPT2	0	2.47597	0	2.47597	0	2.47597	0	0	0	0	0	0	0	0	0	0	0	0	2.47597	0	0	0	0	0	0	0	0	0	0	0	0	0	0	0	0	0	0	0	0	0	0	0	0	0	0	0	0
251	ATGATCGCAGCATACT.1_2	shGFPT2	0	1.64458	0	1.64458	0	0	0	0	0	0	0	1.64458	0	0	0	0	0	0	0	0	0	0	0	0	1.64458	2.2362	0	2.2362	0	0	0	0	0	0	0	0	2.2362	0	0	0	0	0	0	0	0	1.64458	0
253	ATGCCTCGTATCGAAA.1_2	shGFPT2	0	0	0	1.88907	0	0	0	0	0	0	0	0	1.33674	0	1.33674	0	0	0	2.50361	0	0	0	0	0	0	0	1.88907	0	0	0	0	0	0	0	0	0	1.33674	0	0	0	0	0	0	0	1.88907	0	0
254	ATGCGATCAGGTTCAT.1_2	shGFPT2	0	0.966123	0.595462	0.595462	0	1.23594	0	0	0.966123	0	1.23594	1.23594	0	0	0	0	0	0.595462	0.595462	0	0.595462	0	0	0	0.966123	0	0.966123	0.595462	0	0	0.966123	0	0.595462	0	0.595462	0.595462	0	0	0.966123	0	0	0	0	0	1.90167	0	0
255	ATGCGATTCGCTTACC.1_2	shGFPT2	0.981768	0.981768	0	1.46749	0	0	0	0	0	0	0	0	0	0	0.981768	0	0	0	1.46749	0	0	0	0	0	1.46749	0	1.79301	0	0	0	0	0	0	0	0	0.981768	1.46749	0	0	0	0	0	0.981768	0	0	0.981768	0
256	ATGGATCGTTGGTACT.1_2	shGFPT2	0	0	0	0	0	0	0	0	0	0	0	0	2.10385	0	1.22355	0	0	0	1.75759	0	0	0	0	0	1.75759	0	0	0	0	0	0	0	0	0	0	0	3.11764	0	0	0	0	0	0	0	1.22355	0	0
258	ATGGGAGCATCATTGG.1_2	shGFPT2	0	0	0	0	0	0	0	0	0	0	0	0	0	0	0	0	0	0	0	0	0	0	1.25294	0	2.14029	0	0	0	0	0	1.25294	0	0	0	0	0	1.79197	0	0	0	0	0	0	0	0	0	0
259	ATGGGTTGTCAGCTTA.1_2	shGFPT2	0	0	0	0	0	0.924529	0	0	0	0	0	0	2.15216	0	0.924529	0	0	0	0.924529	0	0.924529	0	0	0	0	0	0	0.924529	0	0	1.71597	0	0	0	0	0	0	0	0	0	0	0	0	1.71597	1.71597	0	0
261	ATGGTTGGTCTTGCTC.1_2	shGFPT2	0	0	1.5977	0	0	0	0	0	0	0	0	1.5977	0	0	0	0	0	0	0	0	0	0	1.5977	0	0	0	2.5514	2.18418	0	0	0	0	0	1.5977	0	1.5977	0	0	0	0	0	0	0	0	0	0	0
265	ATGTCCCGTCTACTGA.1_2	shGFPT2	0	0	0	0	0	0	0	0	0	0	0	0	0	0	3.0072	0	0	0	2.3623	0	0	0	0	0	3.0072	0	0	0	0	0	2.3623	0	0	0	0	2.3623	3.0072	0	0	0	0	0	0	0	2.3623	0	0
266	ATGTCTTCATGACCCG.1_2	shGFPT2	0	0	0	0	0	2.52368	0	0	0	0	0	0	0	0	0	0	0	1.90765	0	0	0	0	0	0	0	0	1.90765	0	0	0	0	0	0	0	0	0	1.90765	0	0	0	0	0	0	1.90765	1.90765	0	0
268	ATTACTCCATGAAAGT.1_2	shGFPT2	0	0	0	1.31322	0	1.31322	0	0	0	0	0	0	0	0	0	1.31322	0	0	2.21423	0	0	0	0	0	1.31322	0	1.86195	1.31322	0	0	1.86195	0	1.31322	0	0	0	2.21423	0	0	0	0	0	1.31322	0	2.21423	0	0
270	ATTACTCTCCCTCGAT.1_2	shGFPT2	0	0	0	1.40049	0	0	0	0	1.40049	0	0	0	0	0	0	0	0	0	2.31959	0	0	0	1.40049	0	0	0	0	1.40049	0	0	0	0	0	0	0	0	0	0	1.96211	0	0	0	0	1.40049	1.40049	0	0
272	ATTATCCAGTGTGTTC.1_2	shGFPT2	0	0	0.459615	0	0	0.459615	0	0	0.773311	0	1.01174	0.459615	0	0	0	0.773311	0	0.773311	0.459615	0	0	0	0	0	1.36541	0	0	0	0.459615	0	0	0	0.459615	0	0.459615	0.459615	0.459615	0	0.459615	0	0	0	0	0	1.20413	0.773311	0
276	ATTCAGGGTGACCGTC.1_2	shGFPT2	0	0	0	1.75324	0	1.75324	0	0	0	0	0	0	0	0	0	0	0	0	2.3558	0	0	0	0	0	1.75324	1.75324	0	1.75324	0	0	0	0	0	0	0	1.75324	2.72915	0	0	0	0	0	0	0	1.75324	0	0
278	ATTCATCAGCCTTCTC.1_2	shGFPT2	0	0	0	0	0	0	0	0	0	0	2.27402	0	0	0	0	0	0	0	0	0	0	0	0	0	2.27402	0	0	0	0	2.27402	0	0	0	0	0	0	0	0	0	0	0	0	0	0	0	0	0
282	ATTCCTAGTTAGAAGT.1_2	shGFPT2	0	0	0	0	0.940317	0.940317	0.940317	0	1.41624	0	0	0	0	0	0	0	0.940317	0	0.940317	0	0.940317	0	0	0	1.41624	1.41624	0.940317	0	1.73737	0.940317	0	0	0	0	0	0	0	0	0	0	0	0	0	0	0	0	0
283	ATTCGTTAGGTCGTCC.1_2	shGFPT2	0	1.93198	0	1.93198	0	0	0	0	0	0	0	0	0	0	0	0	0	0	2.92903	0	0	0	0	0	0	0	0	0	0	0	0	0	0	1.93198	0	1.93198	0	0	0	0	0	0	0	0	0	0	0
284	ATTCGTTGTGATTGGG.1_2	shGFPT2	0	0	0	0	0	0	0	0	0	0	0	0	0	0	0	0	0	0	3.36904	0	0	0	0	0	2.08102	0	0	0	0	0	0	0	0	0	1.50548	1.50548	0	0	1.50548	0	0	0	0	0	1.50548	0	0
290	ATTGGGTCATCCCACT.1_2	shGFPT2	1.40026	0	0	0	0	1.96185	0	0	0	0	0	0	0	0	0	0	0	0	1.96185	0	0	0	0	0	2.31931	0	1.40026	0	0	0	1.40026	0	1.40026	0	0	0	3.10878	0	0	0	0	0	0	0	2.31931	0	0
291	ATTGGGTCATTGTGCA.1_2	shGFPT2	1.89746	0	0	1.89746	0	0	0	0	0	0	0	0	0	0	0	0	0	0	1.89746	0	0	0	0	0	2.51267	0	1.89746	0	0	0	2.51267	0	1.89746	0	0	0	1.89746	0	0	0	0	0	0	0	0	0	0
292	ATTGTTCCACTGTGAT.1_2	shGFPT2	0	0	0	2.3178	0	0	0	0	1.71859	0	0	1.71859	0	0	1.71859	0	0	0	0	0	0	0	0	0	1.71859	0	1.71859	1.71859	0	0	1.71859	0	0	0	0	0	0	0	0	0	0	0	0	1.71859	2.3178	0	0
293	ATTTACCCATAGGAGC.1_2	shGFPT2	0	0.811034	0.811034	1.05617	0	1.2529	0	0	0.811034	0	1.55829	0.48558	0.48558	0	0.48558	0.811034	0	0.48558	1.41721	0	0	0	0	0	1.98116	1.41721	0.48558	0.48558	0	0.48558	0.48558	0	1.41721	0.48558	0	1.05617	1.79192	0	1.05617	0	0	0	0.811034	0	0	0.48558	0
294	ATTTCTGCAGAATCGG.1_2	shGFPT2	0	0	0	0	0	1.76197	0	0	0	0	0	1.22729	0	0	1.22729	0	0	0	0	0	0	0	0	0	0	1.76197	0	1.76197	0	0	0	0	0	0	0	0	2.36536	0	0	1.22729	0	0	1.22729	0	2.1085	0	0
295	ATTTCTGCAGTTCACA.1_2	shGFPT2	0	2.11105	0	2.11105	0	2.11105	0	0	0	0	0	0	0	0	0	0	0	0	2.74173	0	0	0	0	0	2.74173	0	2.11105	0	0	0	0	0	0	0	0	0	0	0	0	0	0	0	0	0	0	0	0
297	ATTTCTGGTTCAGCGC.1_2	shGFPT2	2.23732	1.6456	0	0	0	0	0	0	0	0	0	0	0	0	0	0	0	0	2.23732	0	0	0	0	0	0	0	1.6456	1.6456	0	0	1.6456	0	0	0	0	1.6456	0	0	1.6456	0	0	0	0	0	1.6456	1.6456	0
298	ATTTCTGTCCATCTAT.1_2	shGFPT2	0	0.778341	0	0	0	0	0	0	0	0	0	1.21066	0	0	0.778341	0	0	0	0	0	0	0	0	0	1.51151	0	0.778341	0.778341	0	0	1.51151	0	0.778341	1.21066	0	1.74247	2.344	0	1.51151	0	0	0	0	0	1.21066	0	0
299	ATTTCTGTCTCATTTG.1_2	shGFPT2	0	0	0	0	0	1.43973	0	0	0	0	0	1.43973	0	0	0	0	0	0	2.63033	0	0	0	0	0	0	0	0	1.43973	0	0	0	0	0	0	0	1.43973	2.63033	0	0	0	0	0	0	0	1.43973	0	0
301	CAACAACTCCAAGAGG.1_2	shGFPT2	0	0	0.912676	0.912676	0	3.08529	0	0	0.912676	0	0	0	0	0	0.912676	0	0	0	2.55938	0	1.38177	0	0	0	1.38177	1.38177	1.38177	1.38177	0	0	0.912676	0	1.38177	0	0	0	1.69982	0	0	0	0	0	0	0	1.38177	0	0
304	CAACGATGTTCTTCAT.1_2	shGFPT2	0	1.20099	0	0	0	0	0	0	0	0	0	1.20099	0	0	0	0	0	0	2.53505	0	0	0	0	0	1.20099	0	0	1.20099	0	0	0	0	0	0	0	0	2.33153	0	0	0	0	0	0	0	1.20099	0	0
305	CAACGATTCAACTCTT.1_2	shGFPT2	0.62678	0.361713	0.361713	0.361713	0	1.00911	0	0	1.28501	0	1.15655	0.62678	0	0	0	0.361713	0	1.28501	0.62678	0	0.361713	0	0	0	0.836104	0	1.00911	0.361713	0	0	0	0	0	0.361713	0.361713	0.62678	0.361713	0	0	0	0	0	0	0	1.39884	0.62678	0
306	CAACGATTCTCTCGAC.1_2	shGFPT2	1.41223	0	0	1.73301	0	0	0	0	0	0	0	0.937094	0	0	0.937094	0	0	0	2.33363	0	0	0	0	0	1.73301	0	0	0.937094	0	0	1.41223	0	0.937094	0	0	1.73301	2.33363	0	0	0	0	0	0.937094	0	1.41223	0.937094	0
310	CAAGAGGAGGAAGTCC.1_2	shGFPT2	0	0.464747	0.464747	0	0.464747	2.16228	0.780802	0	0.780802	0	1.6373	0	0	0	0	0	0	0	1.21386	0	0	0	0	0	1.21386	0	0.780802	1.02059	0	0	0	0	0.464747	0	0	0.780802	1.21386	0	0.780802	0	0	0	0	0.464747	0.780802	0	0
313	CAAGGGATCCTGGCTT.1_2	shGFPT2	1.39157	0	0	1.95193	0	0	0	0	0	0	0	2.30891	0	0	0	0	0	0	1.95193	0	0	0	0	0	1.95193	0	1.95193	0	0	0	1.95193	0	0	0	0	0	2.77918	0	0	0	0	0	0	0	0	0	0
315	CAATACGGTACTCGAT.1_2	shGFPT2	0	2.28346	0	2.28346	0	0	0	0	0	0	0	0	2.28346	0	0	0	0	0	2.9243	0	0	0	0	0	0	0	2.28346	0	0	0	0	0	0	0	0	0	2.9243	0	0	0	0	0	0	0	2.28346	0	0
317	CAATTTCGTCGTGTTA.1_2	shGFPT2	1.91059	0	0	0	0	0	0	0	0	0	0	0	0	0	1.91059	0	0	0	1.91059	0	0	0	0	0	2.52686	0	0	0	0	0	1.91059	0	0	0	0	0	0	0	0	0	0	0	0	0	0	0	0
322	CACCAAAGTGCCTAAT.1_2	shGFPT2	0	0	0	2.08471	0	0	0	0	0	0	0	0	0	0	0	0	0	0	2.71367	0	0	0	0	0	0	0	0	0	0	0	0	0	0	0	0	2.08471	0	0	0	0	0	0	0	0	0	0	0
325	CACCGTTTCCGTATGA.1_2	shGFPT2	1.22448	0	0	0	0	0	0	0	0	0	0	0.789003	0	0	0	0	0	0.789003	0.789003	0	0	0	0	0	0	0	0	0	0	0	0.789003	0	0	0	1.22448	0.789003	0.789003	0	0	0	0	0	0	0.789003	0.789003	1.52684	0
327	CACGGGTAGACAACAT.1_2	shGFPT2	0	0	0	1.57423	0	0	0	0	0	0	0	0	0	0	0	0	0	1.57423	3.32464	0	1.57423	0	0	0	1.57423	0	0	1.57423	0	0	1.57423	0	0	0	0	0	0	0	0	0	0	0	0	1.57423	0	0	0
331	CACTGAAGTCTTACAG.1_2	shGFPT2	1.05671	0	0	1.55893	0	0	0	0	0	0	0	0	0	0	0	0	0	0	1.55893	0	0	0	0	0	1.05671	0	1.05671	2.3403	0	0	1.55893	0	0	1.05671	0	1.05671	0	0	0	0	0	0	0	0	1.05671	0	0
332	CACTGGGTCTGAATGC.1_2	shGFPT2	0	1.43851	0	0	0	2.36492	0	0	0	0	0	0	1.43851	0	0	0	0	0	0	0	0	1.43851	0	0	0	0	1.43851	0	0	0	2.36492	0	0	0	0	0	2.00536	0	0	0	0	0	0	0	1.43851	0	0
333	CACTGTCAGAAGGTAG.1_2	shGFPT2	1.09278	1.60243	0	0	0	1.9384	0	0	1.09278	0	1.60243	1.09278	0	0	0	0	0	1.09278	1.09278	0	0	0	0	0	1.9384	0	1.09278	1.09278	1.60243	0	1.09278	0	0	1.09278	0	0	2.82497	0	1.09278	0	0	0	0	0	1.09278	0	0
334	CACTGTCGTTAAGACA.1_2	shGFPT2	1.10492	0	0	0	0	0	0	1.10492	0	0	0	1.10492	0	0	0	0	0	0	1.617	0	0	0	0	0	0	0	0	0	0	0	0	0	0	0	0	0	0	0	0	0	0	0	0	0	1.617	0	0
338	CAGATTGGTCAACATC.1_2	shGFPT2	0	0	0	0.936528	0	0.936528	0	0.936528	0	0	0	0	0	0	0	0	0	0	1.73224	0	0	0	0	0	0	0	0.936528	0	0	0	0.936528	0	0	0	0	0	1.41153	0	0.936528	0	0	0	0	0	0	0	0
341	CAGCACGCACAGCCTG.1_2	shGFPT2	0	0	0	0	0	0	0	0	0	0	0	1.56879	0	0	0	0	0	0	1.56879	0	0	0	0	0	1.56879	0	2.15196	0	0	0	0	0	0	0	0	0	3.31803	0	1.56879	0	0	0	0	0	2.15196	0	0
344	CAGGCCATCACCATCC.1_2	shGFPT2	0	1.46839	0	1.17191	1.17191	0	0.748621	0	1.46839	0	0	1.17191	0	0	0	0.748621	0	0	1.17191	0	0	0	0	0	2.73975	1.17191	0.748621	0.748621	1.17191	0	0	0	0.748621	0.748621	0.748621	1.46839	1.46839	0	0	0	0	0	0	0	1.46839	0	0
347	CAGTTCCCAAAGCGTG.1_2	shGFPT2	0.594296	0	0	0	0	0.594296	0	0	0	0	2.97911	0	0	0.594296	0	0	0	0	0	0	0.594296	0	0.594296	0	0.594296	0.594296	0.594296	0.594296	0	0	0.594296	0	0	0.964513	0.594296	0.594296	0.594296	0	0.964513	0	0	0	0	0	1.23409	0	0
350	CATACAGCAAAGGTTA.1_2	shGFPT2	1.74383	0	0	2.34549	0	1.74383	0	0	0	0	0	0	0	0	0	0	0	0	0	0	0	0	0	0	1.74383	0	0	0	0	0	0	0	0	0	0	0	2.7185	0	3.20259	0	0	0	0	0	0	0	0
351	CATACAGGTCTCGGGT.1_2	shGFPT2	0	0	0	0	0	0	0	0	0	0	0	0	0	0	0	0	0	0	2.36974	0	0	0	0	0	0	0	1.76598	0	0	0	1.76598	0	0	0	1.76598	0	2.36974	0	0	0	0	0	0	0	1.76598	0	0
352	CATACTTTCTTCCAGC.1_2	shGFPT2	0	0	0	0	0	0	0	0	0	0	0	1.33861	0	0	0	0	1.33861	0	0	0	0	0	0	0	1.89122	1.89122	1.33861	0	0	0	0	0	0	0	0	1.33861	1.33861	0	1.89122	0	0	0	0	1.89122	1.89122	0	0
354	CATCGTCAGCTCGCAC.1_2	shGFPT2	0	0	0	0	0	0	0	0	0	0	0	2.30106	0	0	0	0	0	0	2.94283	0	0	0	0	0	0	0	2.30106	0	0	0	0	0	0	0	0	2.30106	0	0	0	0	0	0	0	0	0	0	0
355	CATCGTCTCAGGGTAG.1_2	shGFPT2	0	0	0	0	0	1.40534	0	0	0	0	1.40534	0	0	0	0	0	0	0	1.40534	0	0	0	0	0	0	0	1.96765	1.40534	0	0	1.40534	0	0	1.40534	0	1.40534	2.58834	0	0	0	0	0	0	0	2.3254	0	0
356	CATGAGTCACGACAAG.1_2	shGFPT2	0	1.45793	0	1.45793	0	0.974006	0	0	0	0	0	0.974006	0	0	0	0	0	0	1.45793	0	0.974006	0	0	0	0	0.974006	1.45793	2.22383	0.974006	0.974006	0	0	0	0	0	1.45793	1.78265	0	2.22383	0	0	0	0	0	0.974006	0	0
362	CATGGATGTCCGGACT.1_2	shGFPT2	0	0	0	0	0	0	0	0	0	0	0	2.23583	0	0	0	0	0	0	0	0	0	0	0	0	0	0	0	2.23583	0	0	2.23583	0	0	0	0	0	2.23583	0	0	0	0	0	0	0	2.23583	0	0
364	CATTCTAAGAAGCTCG.1_2	shGFPT2	0	0	1.37434	0	0	0	0	0	0	0	0	0	0	0	1.37434	0	0	0	0	0	0	0	0	0	0	0	0	0	0	0	0	0	0	0	0	0	2.28822	0	0	0	0	0	0	0	2.28822	0	0
365	CATTCTATCGGAGTAG.1_2	shGFPT2	0	0	0	0	0	0	0	0	0	0	0	1.73589	0	0	0	0	0	0	2.54042	0	0	0	0	0	1.73589	0	1.20507	0	0	0	0	0	1.20507	0	0	2.08081	2.70951	0	0	0	0	0	0	0	2.08081	0	0
368	CATTGAGTCAGTCATG.1_2	shGFPT2	0	0	0	0	0	0	0	0	0	0	0	0	0	0	0	0	0	0	1.97243	0	0	0	0	0	2.97371	0	1.97243	0	0	0	1.97243	0	0	0	0	1.97243	1.97243	0	0	0	0	0	0	0	0	0	0
370	CATTGCCTCATAGAGA.1_2	shGFPT2	0	0	0	0	0	2.11105	0	0	0	0	0	1.53222	0	0	0	0	0	0	1.53222	0	0	0	0	0	0	0	1.53222	0	0	0	0	0	0	0	0	0	2.47531	0	0	0	0	0	2.11105	0	0	0	0
372	CATTGTTCAGTCAACT.1_2	shGFPT2	1.48534	0	1.48534	0	0	0	0	0	1.48534	2.05834	0	0	0	0	0	0	0	0	0	0	1.48534	0	0	0	1.48534	1.48534	1.48534	1.48534	0	0	0	0	2.05834	0	0	0	0	0	2.05834	0	0	0	0	0	1.48534	0	0
374	CCAAGCGGTGTTGCCG.1_2	shGFPT2	0	0	0	1.84224	0	1.84224	0	0	0	0	0	0	0	0	0	0	0	0	3.49238	0	0	0	0	0	1.84224	0	1.84224	0	0	0	1.84224	0	0	0	0	1.84224	0	0	1.84224	0	0	0	0	0	0	0	0
375	CCAATGAAGGCTCCCA.1_2	shGFPT2	0	0	0	1.84943	0	0	0	0	0	0	0	0	0	0	0	0	0	0	2.46065	0	0	0	0	0	2.46065	0	0	1.84943	0	0	1.84943	0	0	0	0	0	1.84943	0	0	0	0	0	0	0	0	0	0
376	CCAATGAAGGCTGGAT.1_2	shGFPT2	0	0	0	1.28871	0	1.28871	0	0	0	0	0	0	0	0	0	0	0	0	2.44343	0	0	0	0	0	1.28871	0	1.28871	1.28871	0	0	0	0	1.28871	0	0	1.28871	0	0	0	0	0	0	0	0	0	1.28871	0
379	CCAATGATCGATAACC.1_2	shGFPT2	0	0	0	0	0	1.21615	0	0	0	0	0	0	0	0	1.21615	0	0	0	1.21615	0	0	0	0	0	0	0	0	0	0	0	0	0	0	0	0	0	1.74891	0	0	0	0	0	0	0	1.21615	0	0
380	CCAATGATCGCGTGCA.1_2	shGFPT2	0	0	0	0	0	0	0	0	0	0	0	0	0	0	0	0	0	2.58891	2.58891	0	0	0	0	0	2.58891	0	0	0	0	0	0	0	0	0	0	0	2.58891	0	0	0	0	0	0	0	2.58891	0	0
381	CCACAAAGTAGCGATG.1_2	shGFPT2	0	0	0	2.13698	0	0	0	0	0	0	0	0	0	0	0	0	0	0	2.13698	0	0	0	0	0	2.13698	0	0	0	0	0	2.13698	0	0	0	0	0	2.76931	0	0	0	0	0	0	0	0	0	0
382	CCACCATCAGACTCTA.1_2	shGFPT2	1.19022	0	0	0	0	0	0	0	0	0	1.19022	1.19022	0	0	0	0	0	0	1.7184	0	0	0	0	0	1.7184	0	0	1.19022	0	0	0	0	1.19022	0	0	1.19022	2.06222	0	1.19022	0	0	0	0	1.19022	2.06222	1.19022	0
389	CCCAACTAGGGACAGG.1_2	shGFPT2	0	0	0	0	0	0	0	0	0	0	0	0	1.30259	0	0	0	0	0	2.20126	0	0	0	0	0	1.84965	0	0	0	0	0	0	0	0	0	0	0	2.66682	0	0	0	0	0	0	0	1.30259	0	0
390	CCCATTGGTAGCACAG.1_2	shGFPT2	0	0	0	0	0	0	0	0	0	0	0	0	0	0	1.45793	0	0	0	2.02738	0	0	0	0	0	0	0	2.38795	0	0	0	0	0	1.45793	0	0	0	0	0	0	0	0	0	2.02738	0	0	0	0
394	CCCTAACAGTGGAATT.1_2	shGFPT2	1.2676	0	0	0	0	1.2676	0	0	1.2676	0	0	1.2676	0	0	0	0	0	0	3.06426	0	0	0	1.2676	0	1.80905	0	0	0	0	0	0	0	0	0	1.2676	1.2676	0	0	0	0	0	0	0	0	1.2676	1.2676	0
399	CCGATGGAGACTTCCA.1_2	shGFPT2	0	0.569977	0	1.19534	0	0.569977	0	0.569977	0	0	0.569977	0	0.569977	0	0.930766	0	0	0	1.85279	0	0.569977	0	0	0	1.57715	0.569977	0.569977	0	0	0	0.930766	0	0.930766	0	0	1.85279	1.85279	0	0.569977	0	0	0	0	0	0.930766	0.569977	0
400	CCGATGGTCGAAGCCC.1_2	shGFPT2	0	1.20458	0	0	1.20458	3.19268	0	0	1.73532	0	0	1.20458	0	0	0	0	0	0	1.20458	0	1.73532	0	0	0	1.20458	1.73532	1.20458	0	0	0	0	0	0	1.20458	0	1.73532	0	0	0	0	0	0	0	0	1.20458	0	0
403	CCGGGTAAGGGACAGG.1_2	shGFPT2	0	0	0	2.34507	0	0	0	0	0	0	0	0	0	0	0	0	0	0	1.74344	0	0	0	0	0	0	0	1.74344	0	0	0	0	0	0	0	0	0	1.74344	0	0	0	0	0	0	1.74344	0	0	0
404	CCGGTGACATGTGGCC.1_2	shGFPT2	1.64256	0	0	1.64256	0	1.64256	0	0	0	0	0	1.12629	0	0	0	0	0	0	2.74659	0	0	0	0	0	0	1.64256	0	1.12629	0	0	0	0	1.12629	0	0	1.64256	0	0	2.87207	0	0	0	1.12629	0	2.60308	0	0
410	CCTAACCTCGTGGCTG.1_2	shGFPT2	1.5548	0	0	0	0	0	0	0	0	0	0	0	0	0	0	0	0	0	2.13633	0	0	0	1.5548	0	1.5548	0	2.13633	0	0	0	0	0	0	0	0	2.13633	2.76861	0	0	0	0	0	0	0	2.13633	0	0
411	CCTAAGAGTTATAGCC.1_2	shGFPT2	0	0	0	0	0	0	0	0	0	0	0	1.84358	0	0	0	0	0	0	1.84358	0	0	1.84358	0	0	0	0	0	1.84358	0	0	1.84358	0	0	0	0	0	1.84358	0	2.4543	0	0	0	0	0	2.4543	0	0
413	CCTCAACAGCACACAG.1_2	shGFPT2	0	0	0	0	0	2.05335	0.920193	0	1.39117	0	0	0	0	0	0	0	0	0	1.39117	0	1.95148	0	0	0	1.95148	1.39117	1.39117	1.56328	1.18316	0.562405	0.562405	0	0.920193	0.562405	0.920193	1.18316	0	0	0.562405	0	0	0	0	0	1.39117	0.562405	0
415	CCTCATGAGGTGGGTT.1_2	shGFPT2	0	0	0	0	0	1.46429	0	0	0	0	1.46429	0	0	0	0	0	0	0	3.04199	0	0	1.46429	0	0	2.03457	0	1.46429	0	0	0	0	0	1.46429	0	0	0	2.03457	0	1.46429	0	0	0	0	0	0	0	0
416	CCTCATGGTCAAAGTA.1_2	shGFPT2	0	0	0	0	0	1.13898	0	0	1.13898	0	0	0	0	0	0	0	0	0.723578	0.723578	0	0	0	0.723578	0	1.99752	0.723578	0.723578	1.65769	0.723578	1.13898	0	0	0.723578	0.723578	0	1.13898	1.13898	0	0	0	0	0	1.13898	0.723578	1.4316	1.13898	0
418	CCTCCTCTCGTTCTGC.1_2	shGFPT2	0.53855	0.53855	0	0.53855	0	0.886673	0	0	1.1444	0	2.39692	0	0	0	0	0	0	0	1.51899	0	0.53855	0.53855	0.53855	0	1.1444	0	1.1444	0.886673	0	0	0.886673	0	0	0	1.51899	0.53855	0.53855	0	1.1444	0	0	0	0	0	1.79087	0	0
424	CCTTGTGTCGAGTCCG.1_2	shGFPT2	0	0	0	2.58267	0	1.96237	0	0	0	0	0	0	0	0	0	0	0	0	0	0	0	0	0	0	0	0	0	0	0	0	0	0	0	0	0	0	0	0	0	0	0	0	0	0	0	0	0
432	CGACAGCCACGGCCAT.1_2	shGFPT2	0	0	0	1.79134	0	1.79134	0	0	0	0	0	1.79134	0	0	0	0	0	0	2.39744	0	0	0	0	0	1.79134	0	1.79134	1.79134	0	0	0	0	0	0	0	0	0	0	1.79134	1.79134	0	0	0	0	0	0	0
434	CGAGAAGGTGAGTAAT.1_2	shGFPT2	0	0	0	0	0	0	0	0	0	0	0	0	0	0	1.25563	0	0	0	1.25563	0	0	0	0	0	2.1436	0	1.25563	0	0	0	0	0	0	0	0	0	2.1436	0	0	0	0	0	0	0	1.7951	0	0
435	CGAGAAGTCAAACGAA.1_2	shGFPT2	0	0	0	1.52628	0	0	0	0	1.52628	0	0	0	0	0	0	0	0	0	1.52628	0	0	0	1.52628	0	2.9447	0	1.52628	0	0	0	0	0	0	1.52628	0	1.52628	0	0	0	0	0	0	0	0	0	1.52628	0
436	CGAGGAACAGCACAAG.1_2	shGFPT2	0	0	0	0	0	1.4549	0	0	1.4549	0	0	1.4549	0	0	0	0	0	0	2.38437	0	0	0	0	0	0	0	2.02395	0	0	0	2.02395	0	1.4549	0	0	1.4549	0	0	1.4549	0	0	0	0	1.4549	0	0	0
437	CGAGGCTTCCCTCTTT.1_2	shGFPT2	0	0.84829	0	0.84829	0.84829	1.84729	0	0	0.84829	0	0.84829	0	0	0	0	0	0	0	1.30054	0	0	0	0	0	1.30054	0	0.84829	1.30054	0.84829	0	0.84829	0	0.84829	0	0	1.30054	0.84829	0	0	0	0	0	0	0.84829	1.30054	0	0
439	CGAGTGCCAGCTGCCA.1_2	shGFPT2	0.987228	0.987228	0	0	0	0	1.47421	0	1.47421	0	0	0	0	0	0.987228	0	0	0	0	0	0.987228	0	0	0	0.987228	2.04577	1.47421	0.987228	0	0	0	0	0.987228	0	0	0	2.04577	0	0.987228	0.987228	0	0	0	0	0	0	0
440	CGAGTGCCATGGCCCA.1_2	shGFPT2	0	0	1.21133	1.21133	0	1.21133	0	0	0	0	0	0	1.21133	0	0	0	0	0	2.86252	0	0	0	0	0	2.34485	0	2.08862	0	0	0	0	0	1.21133	1.21133	0	0	2.34485	0	0	0	0	0	0	1.21133	1.21133	0	0
441	CGATCGGTCGGCTGAC.1_2	shGFPT2	2.31863	0	0	1.71934	0	0	0	0	0	0	0	0	0	0	1.71934	0	0	0	1.71934	0	0	0	1.71934	0	0	0	1.71934	0	0	0	0	0	1.71934	0	0	0	3.17406	0	0	0	0	0	0	0	1.71934	0	0
442	CGATGCGCACTAGGTT.1_2	shGFPT2	0	0	0	0	0	2.3658	0	0	0	0	0	0	0	0	0	0	0	0	2.3658	0	0	0	0	0	2.0062	0	2.0062	2.3658	0	0	0	0	0	0	0	1.43924	1.43924	0	0	0	0	0	0	0	2.0062	1.43924	0
448	CGCATGGGTACCACGC.1_2	shGFPT2	0	0	0	0	0	0	0	0	0	0	0	0	0	0	0	0	0	0	1.74539	0	0	0	0	0	0	0	0	0	0	0	0	0	1.74539	0	0	0	1.74539	0	0	0	0	0	0	0	0	0	0
449	CGCCAGACAGAGTTCT.1_2	shGFPT2	0	0	0	1.00374	0	1.00374	0	0	0	0	1.2789	1.2789	0	0	0.622848	0	0	0.622848	1.00374	0	0	0	0	0	0.622848	0	1.00374	0	0	1.00374	1.00374	0	1.2789	0	0.622848	1.00374	0.622848	0	1.00374	0	0	0.622848	0.622848	0	1.00374	0	0
452	CGGAACCCAGATAAAC.1_2	shGFPT2	1.41258	0	0	0	0	0	0	0	0	0	0	1.9759	1.41258	0	1.41258	0	0	0	2.80534	1.41258	0	0	0	0	1.9759	2.33405	0	0	0	0	1.9759	0	1.41258	0	0	0	1.41258	0	0	0	0	0	1.41258	0	1.41258	0	0
453	CGGAATTTCTGACAGT.1_2	shGFPT2	0.424003	0	0	0.424003	0	1.13535	0	0	0.720827	0	2.06241	0.949416	0	0	0	0.720827	0.424003	0	0.424003	0	0	0	0	0	1.29208	0.720827	0	1.54681	1.13535	0	0	0	0.424003	0.424003	0	0	1.54681	0	0.720827	0	0	0	0.424003	0	1.42753	0	0
454	CGGACACCACGAAGAC.1_2	shGFPT2	0	0	0	0	0	0	0	0	0	0	0	1.92046	0	0	0	0	0	0	1.92046	0	0	0	0	0	2.53752	0	0	0	0	0	1.92046	0	0	0	0	0	1.92046	0	0	0	0	0	0	0	0	0	0
455	CGGCAGTCAGAGTCTT.1_2	shGFPT2	0	0	0	0	0	0	0	0	0	0	0	1.85418	0	0	0	0	0	0	2.67181	0	0	0	0	0	2.20604	0	1.85418	0	0	0	1.3065	0	1.3065	1.3065	0	1.3065	2.20604	0	0	0	0	0	0	0	2.67181	1.3065	0
458	CGGGCATCACGGTGCT.1_2	shGFPT2	0.915541	0.915541	0	2.13896	0	0	0	0	0	0	0	0.915541	0	0	0	0	0	0	2.67299	0	0	0	0	0	1.70373	0	1.94484	0.915541	0	0	1.38536	0	0.915541	0	0.915541	0	2.44121	0	0.915541	0	0	0	0	1.70373	1.38536	0	0
460	CGGGTCATCTCGCTTG.1_2	shGFPT2	0.828984	0	0	0	0	0.828984	0	0	0	0	0	0.828984	0	0	0	0	0	0.828984	1.81872	0	0	0	0	0	1.81872	1.81872	1.27592	0	1.5837	0.828984	0	0	0	0	0	0	1.5837	0	0	0	0	0	0	0	1.5837	0	0
465	CGTAGTACAATCTGCA.1_2	shGFPT2	0	0	0	0	0	2.17451	0	0	0	0	0	0	0	0	0	0	0	0	0	0	0	0	0	0	1.41565	0	0	0	0.939842	0	0	0	0	0	0	1.41565	0	0	0.939842	0	0	0	0	0	0	1.41565	0
470	CGTGATACAGCACACC.1_2	shGFPT2	0	0.956267	0.427871	0.726571	0	1.84686	0	0	0	0	0.726571	0.427871	0	0	0	0	0	1.30018	2.07215	0	0.726571	0	0.427871	0	1.5556	0	0.956267	0.726571	0	0	0.726571	0	0	0	0.726571	0.427871	1.30018	0	0.427871	0.427871	0	0	0	0	1.14293	0.427871	0.427871
471	CGTGATAGTCTGTGCG.1_2	shGFPT2	2.41535	0	0	0	0	0	0	0	0	0	0	0	0	0	0	0	0	0	0	0	0	0	0	0	0	0	2.41535	0	0	0	2.41535	0	0	0	0	0	3.0628	0	0	0	0	0	0	0	3.0628	0	0
475	CGTTCTGAGTAACAGT.1_2	shGFPT2	0	0	0	2.63092	0	0	0	0	0	0	0	0	0	0	2.00731	0	2.00731	0	2.00731	0	0	0	0	0	0	0	2.63092	2.00731	0	0	0	0	0	0	0	0	0	0	0	0	0	0	0	0	2.00731	0	0
478	CTAACTTCAACAAGAT.1_2	shGFPT2	0.716756	0	0.716756	0	0	1.4215	0	0	1.4215	0	0	0	0	0	0	0	0	0	2.34469	0	0	0	0	0	1.8308	1.12997	1.12997	0.716756	0	0	0	0	0.716756	0	0	0	1.4215	0	0	0	0	0	0	0.716756	1.4215	0	0
479	CTAACTTCATCCTTCG.1_2	shGFPT2	1.93925	0	0	0	0	1.09344	0	0	0	0	0	0	1.60323	0	0	0	0	0	0	0	0	0	1.09344	0	2.39083	0	0	0	0	0	1.60323	0	1.09344	0	0	0	2.19032	0	1.09344	0	0	0	1.09344	0	2.19032	0	0
481	CTACAGAGTTCGGTCG.1_2	shGFPT2	1.27054	0	0	0	0	0	0	0	0	0	0	1.27054	1.27054	0	1.27054	0	0	0	2.62568	0	0	0	0	0	1.27054	1.27054	1.27054	0	0	0	0	0	1.81247	0	0	1.81247	1.27054	0	0	0	0	1.27054	0	0	1.27054	0	0
482	CTACAGATCTGGACTA.1_2	shGFPT2	1.43071	0	0	1.99651	0	0	0	0	1.43071	0	0	1.43071	0	0	0	0	0	0	1.99651	0	0	0	0	0	0	0	0	0	0	0	0	0	0	0	0	0	0	0	0	0	0	0	0	0	1.43071	1.43071	0
484	CTACATTGTTAAGAAC.1_2	shGFPT2	0.494372	0	0.823709	0	0	1.43445	0	0	0.494372	0	1.70043	0	0	0.494372	0	0	0	1.26916	1.07104	0	0	0	0	0	0	0	0	0	0	0	1.07104	0	0.494372	0	0	0.494372	0.494372	0	0.494372	0.494372	0	0	0	0	1.07104	1.07104	0
485	CTACATTTCTGTGCAA.1_2	shGFPT2	1.22051	1.22051	0	1.22051	0	0	0	0	1.22051	0	0	0	0	0	0	0	0	0	2.10007	0	0	0	0	0	1.75403	0	0	1.75403	0	0	1.75403	0	1.22051	0	0	1.75403	2.35666	0	0	0	0	0	0	0	0	1.22051	0
488	CTACCTGGTAGGCAGT.1_2	shGFPT2	1.23901	0	0	0	0	0.800247	0	0	0.800247	0	0	0	0.800247	0	0	0	0	0	1.96438	0	0	0	0	0	1.23901	0	1.23901	0	0.800247	0	1.23901	0	0	0.800247	0.800247	0	2.58482	0	0	0.800247	0	0	0.800247	0.800247	1.23901	1.54293	0
496	CTATCTATCACGGAGA.1_2	shGFPT2	0	0	0	0	0	0	0	0	0	0	0	0	0	0	0	0	0	0	2.49463	0	0	0	0	0	0	0	0	0	1.88078	0	0	0	0	0	0	0	0	0	1.88078	0	0	0	0	0	1.88078	0	0
497	CTCAACCCAGACCGCT.1_2	shGFPT2	0	1.66931	0	2.26353	0	0	0	0	0	0	0	0	0	0	0	0	0	0	1.66931	0	0	0	0	0	0	0	0	0	0	0	0	0	0	0	0	0	0	0	0	0	0	0	0	0	0	0	0
503	CTCATCGGTAGATTGA.1_2	shGFPT2	0	0	1.34194	0	1.34194	0	0	0	2.24912	0	0	0	0	0	0	0	0	0	0	0	1.34194	0	0	0	2.71683	1.34194	0	1.34194	0	0	0	0	0	0	0	1.34194	0	0	1.34194	0	0	0	0	0	0	1.89505	0
504	CTCATCGGTGAGCGAT.1_2	shGFPT2	1.55893	0	0	0	0	0	0	0	0	0	0	0	0	0	0	0	0	0	2.77353	0	0	1.55893	0	0	2.14095	0	1.55893	1.55893	0	0	0	0	0	0	0	0	0	0	0	0	0	0	1.55893	0	1.55893	1.55893	0
507	CTCCAACCAGTAGTTC.1_2	shGFPT2	0	0	0	1.87796	0	1.87796	0	0	0	0	0	0	0	0	0	0	0	0	2.49158	0	0	0	0	0	0	0	1.87796	1.87796	0	0	0	0	0	0	0	0	2.49158	0	0	0	0	0	0	0	1.87796	0	0
508	CTCCAACTCTCCACTG.1_2	shGFPT2	0	0	0	0.888734	0	0.888734	0	0	0	0	0	1.35173	0	0	1.35173	0	0	0	1.66698	0	0	0	0.888734	0	0.888734	0	0.888734	1.35173	0	0	1.35173	0	0.888734	0	0.888734	0	1.66698	0	1.66698	0	0	0	0	0	1.66698	0	0
510	CTCCACAGTACTGTTG.1_2	shGFPT2	0	0	0	0	0	0	0	0	0.96376	0	1.76893	0	0	0	0	0	0	0	2.37297	0	0	0	0	0	2.01305	0	1.76893	1.44529	0	0	1.76893	0	0.96376	0	0	1.44529	1.44529	0	0.96376	0	0	0	1.44529	0	2.37297	0	0
528	CTGAGCGAGCACCGAA.1_2	shGFPT2	0	0	0	0	0	0	0.899972	0	0	0	0	0	0	0	0	0	0	0	1.1598	0	1.36585	0	0	0	1.92252	0	1.36585	0.899972	0	0.899972	0.899972	0	0	1.1598	0	0.547987	2.02392	0	0.547987	0	0	0	0.547987	0.547987	0.899972	0	0
534	CTGCATCCAGTCGGAA.1_2	shGFPT2	0	0	0.788217	0	0	0.788217	0	0	1.22346	0	0	0.788217	0	0	0	0	0	0	1.52571	0	1.22346	0	0.788217	0	1.52571	1.22346	1.22346	0	0.788217	0	0	0	0	0	0	0	0	0	0	0	0	0	0	0	1.22346	0	0
536	CTGCATCTCCCTCTTT.1_2	shGFPT2	0	0.412486	0	0.412486	0	1.26775	0	0	0.928894	0	2.46146	0	0	0	0	1.11261	0	0	0.70366	0	0	0	0	0	0.412486	0	0.928894	0.70366	0.412486	0	0.928894	0	0.412486	0	0.70366	0.412486	0.928894	0	0.70366	0	0	0	0	0	1.26775	0	0
538	CTGCCATTCCGTGGTG.1_2	shGFPT2	0.836549	0	0	0	0	0	0	0	0.836549	0	0	1.28558	0	0	0	0	0	0	1.28558	0	0	0	0	0	0.836549	0	0.836549	1.28558	0.836549	0.836549	0	0	0	0.836549	1.59436	0	0.836549	0	0.836549	0	0	0	0	0.836549	0.836549	0	0
543	CTGCGAGGTAGCACGA.1_2	shGFPT2	0	0	0	0	0	0	0	0	1.80692	0	0	0	0	0	0	0	0	0	3.06183	0	0	0	0	0	1.80692	0	2.78963	0	0	0	2.41442	0	0	0	0	0	1.80692	0	0	0	0	0	0	0	0	1.80692	0
544	CTGCTCACATGCAGCC.1_2	shGFPT2	0	0.60815	0.983598	1.25593	0	1.6458	1.25593	0	0	0	0	0	0.60815	0	0	0	0	0	0.983598	0	0	0	0.60815	0	1.6458	0.60815	1.25593	1.25593	0.60815	0.60815	0	0	0	0	0	0.60815	0.983598	0	0.60815	0	0	0	0	0	0.983598	0	0
545	CTGGACGAGACTAAGT.1_2	shGFPT2	0	0	0	0	0	2.04446	0	0	0	0	0	0	0	0	0	0	0	0	2.67069	0	0	0	0	0	2.04446	2.04446	0	0	0	0	0	0	0	0	0	2.04446	0	0	2.67069	0	0	0	0	0	0	0	0
547	CTGGCAGGTATCCTCC.1_2	shGFPT2	0	0	0	0	0	1.89361	0	0	0	0	0	0	0	0	0	0	0	0	3.16012	0	0	0	0	0	1.89361	0	0	1.89361	0	0	0	0	0	1.89361	0	0	0	0	0	0	0	0	1.89361	0	0	0	0
548	CTGGTCTAGAAGTATC.1_2	shGFPT2	0	0	0	1.96818	0	0	0	0	0	0	0	0	0	0	0	0	0	0	0	0	0	0	0	0	1.96818	0	1.96818	0	0	0	0	0	0	0	0	0	1.96818	0	0	0	0	0	0	0	0	0	0
549	CTGGTCTCAAGTGGAC.1_2	shGFPT2	0	0	0	0.47074	0	1.52759	0	0	1.22516	0	1.22516	0.47074	0	0	0	1.22516	0	1.03088	1.52759	0	0	0	0	0.47074	1.75948	0.47074	1.22516	0.47074	0	0.47074	0.789528	0	0	0	0.789528	0.47074	1.22516	0	0.789528	0	0	0	0	0.47074	0.789528	0.47074	0
551	CTGTATTCATTGCAAC.1_2	shGFPT2	0	0.941269	0	0	0	0	0.941269	0	0	1.98141	0	0.941269	0	0	0.941269	0	0	0	0	0	0	0	0.941269	0	0.941269	0.941269	1.41742	2.60312	1.41742	0	0	0	0	0	0.941269	1.98141	0	0	0.941269	0	0	0	0.941269	0.941269	1.73866	0	0
560	CTTCGGTCACTTTAGG.1_2	shGFPT2	0.71622	0.71622	0.71622	0	0.71622	2.43946	1.12926	0	1.12926	0	0	0	0	0	0	0	0	0	1.12926	0	0	0	0.71622	0	0.71622	1.12926	1.6461	1.6461	1.42071	0.71622	0.71622	0	0	0	0	1.6461	0	0	1.42071	0	0	0	0	0.71622	1.12926	0.71622	0
565	CTTTCAAAGGAAAGGT.1_2	shGFPT2	1.43144	1.43144	0	0	0	0	0	0	0	0	0	1.43144	0	0	0	0	0	0	2.35652	0	0	0	0	0	1.43144	0	0	0	0	0	0	0	1.43144	0	1.43144	0	1.43144	0	1.43144	0	0	0	0	1.43144	1.43144	0	0
566	CTTTCAAAGTTCACTG.1_2	shGFPT2	0.738977	0	0.436251	0.97104	0	0.97104	0	0	0.738977	0	0.738977	0	0	0	0	0.436251	0	1.57449	1.45427	0	0.738977	0	0	0	0.97104	0.436251	0.97104	0.436251	0	0	0.738977	0	0.436251	0	0.436251	0.97104	1.31761	0	1.15926	0	0	0	0	0	1.15926	0	0
567	CTTTCAAGTAGATCCT.1_2	shGFPT2	0	0	0	1.4827	0	1.4827	0	0	1.4827	0	0	0	0	0	0	0	0	0	2.05536	0	0	0	0	0	2.41721	0	2.05536	0	0	0	0	0	0	0	0	0	1.4827	0	0	0	0	0	0	0	0	0	0
570	CTTTCGGGTAAGTTGA.1_2	shGFPT2	0	0	0	1.95142	0	1.1029	0	0	0	0	1.95142	1.1029	0	0	0	0	0	0	1.61458	0	0	0	0	1.61458	1.61458	0	1.61458	0	0	0	0	0	1.1029	1.61458	0	0	0	0	1.61458	0	0	0	0	1.1029	0	0	0
572	GAAACCTGTACAAACA.1_2	shGFPT2	1.44343	0	0	0	0	1.44343	0	0	1.44343	0	0	1.44343	0	0	0	0	0	0	2.01095	0	0	0	0	0	1.44343	0	1.44343	0	0	1.44343	0	0	1.44343	0	0	0	2.37077	0	1.44343	0	0	0	0	0	0	0	0
574	GAACACTGTAATTAGG.1_2	shGFPT2	2.60617	0	0	2.60617	0	0	0	0	0	0	0	0	0	0	0	0	0	0	2.60617	0	0	0	0	0	1.98424	0	1.98424	1.98424	0	0	2.60617	0	2.98672	0	1.98424	1.98424	2.60617	0	0	0	0	0	0	0	1.98424	0	0
576	GAACGTTAGATGCTGG.1_2	shGFPT2	0	0	0	0	0	0	0	1.43144	0	0	0	0	0	0	0	0	0	0	2.62023	0	0	0	0	0	1.43144	0	0	0	0	0	0	0	1.99734	0	0	0	3.2763	0	0	0	0	0	0	0	0	0	0
577	GAACTGTGTCGTGGAA.1_2	shGFPT2	0	1.9262	1.36907	0	0	1.36907	0	0	0	0	0	1.36907	0	0	0	0	0	0	1.36907	0	1.36907	1.36907	0	0	1.36907	2.28188	1.36907	0	1.36907	0	0	0	1.9262	0	0	1.36907	0	0	0	0	0	0	0	0	1.36907	0	0
579	GAAGCCCTCGTCTCAC.1_2	shGFPT2	0	0	0	0	0	0	0	0	0	0	0	0	0	0	0	0	0	0	2.36798	0	0	0	0	0	1.76438	0	2.74173	0	0	0	0	0	0	0	0	0	3.01317	0	0	0	0	0	1.76438	0	1.76438	0	0
582	GAAGGACTCTCGGGAC.1_2	shGFPT2	0	1.88126	0	2.49514	0	0	0	0	0	0	0	0	0	0	0	0	0	0	0	0	0	0	0	0	0	0	0	0	0	0	0	0	0	0	0	1.88126	0	0	0	0	0	0	0	0	0	0	0
583	GAAGGGTAGCTTCATG.1_2	shGFPT2	0	0	0	0	0	0	0	0	0	0	0	0	2.03283	0	0	0	0	0	2.65826	0	0	0	0	0	0	0	0	0	0	0	0	0	0	0	0	0	2.65826	0	0	0	0	0	0	0	0	0	0
587	GACACGCGTACAGTAA.1_2	shGFPT2	0	2.60501	0	0	0	0	0	0	2.60501	0	0	0	0	0	0	0	0	0	3.2605	0	0	0	0	0	0	0	0	0	0	0	0	0	0	0	0	0	2.60501	0	0	0	0	0	0	0	0	0	0
588	GACACGCGTATCTCGA.1_2	shGFPT2	1.60149	1.60149	0	2.18838	0	1.60149	0	0	0	0	0	1.60149	0	0	0	0	0	0	2.18838	0	0	0	0	0	1.60149	0	2.18838	0	0	0	2.82385	0	0	0	1.60149	0	1.60149	0	0	0	0	0	0	0	1.60149	0	1.60149
593	GACCAATTCACTACGA.1_2	shGFPT2	0	0	0	2.42141	0	0	0	0	0	0	0	0	0	0	0	0	0	0	1.81333	0	0	0	0	0	1.81333	0	0	1.81333	0	0	1.81333	0	0	0	0	0	0	0	0	0	0	0	0	0	2.79682	0	0
594	GACCCAGAGACAACTA.1_2	shGFPT2	1.73186	0	0	0	0	0	0	0	0	0	0	1.73186	0	0	0	0	0	0	0	0	0	0	0	0	0	0	2.97577	0	0	0	0	0	0	0	0	0	2.97577	0	0	0	0	0	0	0	0	1.73186	0
595	GACCCAGAGCCTCACG.1_2	shGFPT2	2.2471	0	0	2.2471	0	0	0	0	0	0	0	0	0	0	0	0	0	0	2.2471	0	0	0	0	0	2.88594	0	2.2471	0	0	0	0	0	0	0	0	0	0	0	0	0	0	0	0	0	0	0	0
596	GACCCAGTCAGTGCGC.1_2	shGFPT2	0	0.597073	0.968347	0.968347	0	1.23848	0.597073	0	0.597073	0	0.597073	0.597073	0	0	0	0	0	0.597073	1.23848	0	0.597073	0	0	0	1.62609	0	0.597073	0	0.968347	0.597073	0	0	0	0	0.597073	0.597073	0.968347	0	0.597073	0	0	0.597073	0	0	1.23848	0	0
597	GACCCTTAGTCCTGTA.1_2	shGFPT2	1.68523	0	0	0	0	0	0	0	0	0	0	0	0	0	2.28109	0	0	0	2.9218	0	0	0	0	0	0	0	0	2.28109	0	0	0	0	2.9218	0	0	0	2.6519	0	1.68523	0	0	0	0	0	0	0	0
599	GACCCTTGTAGGCAGT.1_2	shGFPT2	0	0	0	1.41647	0	1.41647	0	0	0	0	0	0	0.940507	0	0	0	0	0	0.940507	0	0	0	0	0	1.73763	0	0	0	0	0	0	0	0	0	0	0.940507	1.73763	0	0	0	0	0	0	0	0.940507	0.940507	0
600	GACCCTTTCGTAGCTA.1_2	shGFPT2	0	0.890848	0.890848	0	0	1.90936	0	0	0.890848	0	0	0.890848	0	0	0	0	0	0	2.10242	0	0.890848	0	0	0	1.35439	2.26417	1.35439	0.890848	0.890848	0	0	0	0	1.35439	0	0	0	0	0.890848	0	0	0	0	0	1.66989	0	0
602	GACGCTGGTTTACCAG.1_2	shGFPT2	1.45516	0	0	1.45516	0	0	0	0	0	0	0	1.45516	0	0	0	0	0	0	0	0	0	0	0	0	0	0	1.45516	0	0	0	1.45516	0	0	0	0	2.02423	1.45516	0	1.45516	0	0	0	1.45516	0	2.38467	1.45516	0
604	GACGTTAGTGGAATGC.1_2	shGFPT2	0	0	0	0	0	0	0	0	0	0	0	0	0	0	0	0	0	0	0	0	0	0	0	0	0	0	0	0	0	1.60848	0	0	0	0	0	1.60848	0	0	0	0	0	0	0	0	0	0	0
607	GACTCTCTCCGTACGG.1_2	shGFPT2	0	1.21984	0	0	0	1.21984	0	0	1.21984	0	0	0	0	0	1.21984	0	0	0	0	0	0	0	0	0	1.75324	0	0	1.21984	0	0	1.21984	0	0	0	1.75324	0	0	0	1.21984	0	0	0	0	0	0	1.21984	0
609	GACTGATTCATGAAAG.1_2	shGFPT2	1.1029	1.1029	0	0	0	1.1029	0	0	0	0	0	2.20293	0	0	0	0	0	0	1.95142	0	0	0	0	0	0	0	1.1029	0	0	0	0	0	0	0	0	2.40373	1.61458	0	0	0	0	0	0	0	1.61458	1.1029	0
610	GACTTCCTCCGTGGCA.1_2	shGFPT2	0.977818	0	0	0	0	0.977818	0	0	0.977818	0	0	0.977818	0	0	0.977818	0	0	0	2.22929	0	0	0	0	0	2.03269	0	0	0	0	0	0	0	0	0.977818	0	0.977818	1.46263	0	1.46263	0	0	0	0	0	0.977818	0.977818	0
613	GAGACTTCAGACGGAT.1_2	shGFPT2	0	0.940888	0.577247	0	0.577247	2.0832	0	0	1.73814	0	0	0	0	0	0	0	0.577247	0	1.41695	0	1.20698	0	0.577247	0	1.86685	1.20698	1.20698	0.940888	0.577247	0	0	0	0.577247	0	0.577247	0.577247	1.20698	0	0.577247	0	0	0	0	0	1.41695	0.577247	0
614	GAGAGGTAGACAAGCC.1_2	shGFPT2	0.36896	0	0	0	0	0.637877	0	0	0.36896	0	1.02422	0	0	0	0	0.36896	0	1.41673	0.637877	0	0	0.637877	0.36896	0	0.36896	0	1.02422	0	0	0	0.36896	0	0.637877	0	0	0.36896	0.36896	0	0	0	0	0	0.36896	0	1.17284	0.637877	0
617	GAGCCTGTCTCGCAGG.1_2	shGFPT2	1.12919	0.716166	0	0	0	1.82984	0	0	1.42063	0	0	0.716166	0	0	0	0	0	0	1.64602	0	0.716166	0.716166	0	0	2.7506	0.716166	1.42063	0.716166	0	0	0	0	0	0	0.716166	0.716166	1.12919	0	0.716166	0	0	0	0.716166	0	1.42063	0	0
618	GAGGCAACAGTTTCAG.1_2	shGFPT2	0	0	0	2.03717	0	0	0	0	0	0	0	0	0	0	0	0	0	0	0	0	0	0	0	0	0	0	2.03717	2.03717	0	0	1.46659	0	0	0	0	0	0	0	0	0	0	0	0	0	0	0	0
622	GAGGGATGTCTATGAC.1_2	shGFPT2	0	1.02496	0	1.02496	0	1.52038	0	0	1.85018	0	0	0	0	0	0	0	0	1.02496	1.02496	0	1.02496	1.02496	1.02496	0	0	1.02496	1.85018	0	2.09777	0	0	0	0	0	0	1.52038	1.85018	0	1.02496	0	0	0	1.02496	0	1.85018	1.02496	0
626	GAGTCATAGATCCTAC.1_2	shGFPT2	0	0	0	0	2.17895	2.17895	0	0	0	0	0	0	0	0	0	0	0	0	0	0	0	0	0	0	0	0	0	0	0	0	0	0	0	0	0	0	0	0	0	0	0	0	0	0	0	2.17895	0
629	GAGTCTACACACCTTC.1_2	shGFPT2	1.11391	0	0	1.96554	0	0	0	0	0	0	0	0	0	0	0	0	0	0	0	0	0	0	0	1.96554	1.11391	0	1.62777	0	0	0	1.62777	0	0	0	0	1.11391	0	0	0	0	0	0	0	0	0	0	0
635	GAGTTGTGTATCCTTT.1_2	shGFPT2	0	0	0	0	0	2.3597	0	0	0	0	0	0	0	0	1.7568	0	0	0	1.7568	0	0	0	0	0	0	0	0	0	0	0	0	0	0	0	0	0	0	0	0	0	0	0	0	0	3.21765	0	0
636	GAGTTTGCATCCTTGC.1_2	shGFPT2	0	0	0	0	0	1.62892	0	0	0	0	0	2.21885	0	0	0	0	0	0	1.62892	0	0	0	1.62892	0	0	0	0	1.62892	0	1.62892	0	0	0	0	0	0	0	0	0	0	0	0	0	1.62892	0	0	0
637	GATAGAAGTGCATACT.1_2	shGFPT2	0	0	0	2.26546	0	0	0	0	0	0	0	0	0	0	0	0	0	0	0	0	0	0	0	0	0	0	0	0	0	0	3.29238	0	0	0	0	0	0	0	0	0	0	0	0	0	0	0	0
641	GATCATGGTCTACATG.1_2	shGFPT2	1.47252	1.47252	0	2.04387	0	1.47252	0	0	0	0	0	0	0	0	0	0	0	0	0	0	0	0	0	0	0	0	2.04387	0	0	0	0	0	0	0	0	2.04387	2.04387	0	0	0	0	0	0	0	0	0	0
644	GATGACTAGCAGGTCA.1_2	shGFPT2	1.22678	0	0	0	1.22678	2.10787	0	0	0	0	0	0	0	0	0	0	0	0	1.76138	0	0	0	0	0	1.76138	0	2.10787	1.22678	0	0	0	0	0	0	0	0	2.3647	0	0	0	0	0	0	0	1.22678	0	0
649	GATTCGAGTTGGAGAC.1_2	shGFPT2	0	0	0	2.26779	0	0	0	0	0	0	0	0	0	0	0	0	0	0	0	0	0	0	0	0	2.26779	0	2.90778	2.26779	0	0	2.26779	0	0	0	0	0	0	0	0	0	0	0	0	0	0	0	0
650	GATTCGATCTAGTGAC.1_2	shGFPT2	0	0	0	1.92071	0	0	0	0	0	0	1.36428	1.36428	0	0	0	0	0	0	2.74499	0	0	0	0	0	1.36428	0	1.92071	0	0	0	0	0	0	1.36428	0	0	2.91655	0	1.36428	0	0	0	0	0	1.92071	0	0
653	GATTGGTTCCCTCTAG.1_2	shGFPT2	1.99661	1.13826	0	1.13826	0	0	0	0	0	0	0	1.13826	0	0	0	0	0	0	2.45158	0	0	0	0	0	2.24975	0	1.13826	1.65683	0	0	1.13826	0	1.99661	0	0	1.13826	1.99661	0	0	0	0	0	0	1.65683	2.61944	0	0
658	GCACGGTAGCCTCTTC.1_2	shGFPT2	0	0	0	1.71075	0	1.18373	0	0	1.18373	0	0	0	0	0	0	0	0	0	1.18373	0	0	0	0	0	1.18373	0	1.18373	2.05408	0	0	1.71075	0	1.18373	0	0	0	0	0	1.18373	0	0	0	0	0	1.18373	0	0
659	GCACGGTCAATGGGTG.1_2	shGFPT2	0	0	0	1.62892	0	1.11487	0	0	1.11487	0	0	0	0	0	0	0	0	0	1.11487	0	0	0	0	0	1.62892	0	1.62892	0	0	0	1.62892	0	0	0	0	1.62892	0	0	0	0	0	0	0	0	1.11487	1.11487	0
660	GCAGGCTTCTGTCCCA.1_2	shGFPT2	0	0	0	1.47525	0	0.988074	0	0	0	0	0	0	1.47525	0	1.47525	0	0	0	1.47525	0	0.988074	0	0.988074	0	0.988074	0.988074	1.80141	0.988074	0	0	0	0	0	0	1.80141	0.988074	0.988074	0	0	0	0	0	0	1.47525	1.47525	0.988074	0
661	GCAGTTAAGCAGGCAT.1_2	shGFPT2	0	0	1.36515	0	0	3.06405	0	0	1.36515	0	0	0	0	0	0	0	1.36515	0	0	0	1.36515	0	0	0	0	0	0	0	0	0	0	0	1.36515	0	0	0	1.36515	0	1.36515	0	0	0	0	0	0	0	0
662	GCAGTTATCCCTTGTG.1_2	shGFPT2	0	0	0	2.42594	0	0	0	0	0	0	0	0	0	0	0	0	0	1.49012	1.49012	0	0	0	1.49012	0	0	0	0	1.49012	0	0	1.49012	0	0	0	0	0	0	0	1.49012	0	0	0	0	0	0	0	0
663	GCATCGGCAGGGTTGA.1_2	shGFPT2	0	0	0	1.51565	0	1.51565	0	0	0	0	0	0	0	0	1.51565	0	0	0	2.45592	0	0	0	0	0	2.09246	0	0	1.51565	0	0	0	0	0	0	0	0	3.25296	0	0	0	0	0	0	0	1.51565	0	0
665	GCATGATGTTTCTTAC.1_2	shGFPT2	1.02789	0	0	0	0	1.70255	0.640582	0	0	0	2.30017	0	0	0	1.02789	0	0	1.02789	0	0	0.640582	0.640582	0	0	0.640582	0	0.640582	1.30637	0.640582	0.640582	0	0	0.640582	0	0	1.30637	0.640582	0	1.52395	0	0	0	0	0.640582	1.02789	0	0
666	GCCAACGCAGCTGGTC.1_2	shGFPT2	0	0	0	0	0	0	0	0	0	0	0	0	0	0	0	0	0	0	0	0	0	0	0	0	1.88433	0	1.33262	1.88433	0	0	1.33262	0	0	0	0	1.33262	0	0	0	0	0	0	1.33262	1.33262	1.33262	1.33262	0
667	GCCAACGTCGCTTTAT.1_2	shGFPT2	0	1.99185	0	0	0	0	0	0	0	0	0	0	0	0	0	0	0	0	2.61434	0	0	0	0	0	1.99185	0	2.61434	0	0	0	0	0	0	0	0	0	2.61434	0	0	0	0	0	0	1.99185	0	0	0
672	GCCAGGTTCAAGGACG.1_2	shGFPT2	0	0	0	0	0	0	0	0	0	0	0	0	0	0	0	0	0	0	3.40577	0	0	0	0	0	1.92096	0	1.92096	0	0	0	0	0	0	0	1.92096	0	1.92096	0	0	0	0	0	0	0	0	0	0
674	GCCATGGCATCCCGTT.1_2	shGFPT2	0	0	0	0.926644	0.926644	1.96067	0.926644	0	1.39922	0	0	0	0	0	0.926644	0	0	0	0	0	0	0	0	0	1.96067	0	1.71884	0.926644	0.926644	0	0.926644	0	0	0	0	0.926644	1.71884	0	0	0	0	0	0	0	1.39922	1.39922	0
675	GCCATTCAGACTCATC.1_2	shGFPT2	0	0	0	1.7068	0	0.917793	0	0	0	0	0	0.917793	0.917793	0	0	0	0	0	2.14228	0	0	0	0	0	1.7068	0	1.38817	1.38817	0	0	0.917793	0	0.917793	0.917793	0	1.38817	1.38817	0	1.7068	0	0	0	0	0.917793	1.94806	0.917793	0
677	GCCCGAATCCACTTTA.1_2	shGFPT2	0	0	0.576939	0	0	2.17541	0	0	2.8101	0	0	0.576939	0	0	0	0	0.576939	0	1.86626	0	0	0	0	0	1.41642	0	1.41642	0	0	0.576939	0.576939	0	0	0.576939	0	0	0.576939	0	0	0	0	0	0.576939	0.576939	0.94046	0	0
679	GCGAGAAAGACTGGGT.1_2	shGFPT2	0	0	0	0	0	0	0	0	0	0	0	1.624	0	0	0	0	0	0	2.21339	0	0	0	0	0	0	0	0	0	0	0	0	0	0	0	0	0	2.21339	0	0	0	0	0	0	0	0	0	0
681	GCGAGAAGTTCACCGG.1_2	shGFPT2	0	0	0	1.8965	0	1.8965	0	0	1.34319	0	0	0	0	0	0	0	0	0	2.25064	0	0	0	0	0	1.34319	0	1.34319	0	0	0	1.8965	0	0	0	0	0	0	0	0	0	0	0	1.34319	0	0	0	0
682	GCGGATCAGACTTGTC.1_2	shGFPT2	1.27276	0	0	0	0	0	0	1.27276	0	0	0	0	1.27276	0	0	0	0	0	2.62854	0	0	0	0	0	0	0	1.81505	1.27276	0	0	0	0	0	0	0	1.27276	2.62854	0	0	0	0	0	0	0	2.42328	0	0
685	GCTACAAAGTAAACGT.1_2	shGFPT2	0	0	0	0	0	0	0	0	0	0	0	1.39179	0	0	0	1.39179	0	0	0	0	0	0	0	0	0	0	0	1.39179	0	0	0	0	0	0	0	0	0	0	1.39179	0	0	0	0	1.39179	1.39179	0	0
686	GCTACAAGTTGCATCA.1_2	shGFPT2	0	0.913927	0	0	0	3.08728	0	0	0.913927	0	0	0	0	0	0	0	0	0	1.70152	0	0	0	0	0	2.13659	0	1.38334	0.913927	0	1.38334	0	0	1.38334	0	0	0	0	0	0	0	0	0	0	0.913927	0.913927	0	0.913927
687	GCTACCTAGTTGCTCA.1_2	shGFPT2	0	0	0	0	0	1.40187	0	0	0	0	0	0	1.40187	0	0	0	0	0	2.96407	0	0	0	0	0	1.96369	1.96369	0	1.40187	0	0	0	0	1.96369	0	0	1.40187	0	0	1.40187	0	0	0	0	0	2.32125	0	0
688	GCTCAAATCTGCCTGT.1_2	shGFPT2	1.1593	1.1593	0	0	0	0	0	0	0	0	0	0	1.1593	0	1.1593	1.1593	0	0	1.1593	0	0	0	0	0	1.1593	0	0	1.1593	0	0	1.1593	0	0	0	0	0	1.68183	0	1.1593	0	0	0	0	0	2.02328	0	0
690	GCTGAATGTGAATATG.1_2	shGFPT2	0	0	1.00952	0	0	1.50154	0	0	1.82984	0	0	0	0	0	0	0	0	0	1.50154	0	1.00952	0	0	0	2.43936	1.50154	0	1.82984	0	1.00952	1.50154	0	1.00952	0	0	1.50154	1.00952	0	1.00952	0	0	1.00952	1.00952	0	0	0	0
691	GCTGAATGTTGCCAAT.1_2	shGFPT2	0	0	0	1.44591	0	1.44591	0	0	0	0	0	0	0	0	0	0	0	0	1.44591	0	1.44591	0	0	0	1.44591	0	1.44591	1.44591	0	0	1.44591	0	0	0	0	0	3.01917	0	0	0	0	0	0	0	2.63783	0	0
693	GCTTCACTCTCAAAGC.1_2	shGFPT2	0	1.26431	0	0	0	1.26431	0	0	1.26431	0	1.26431	0	0	0	0	1.26431	0	0	0	0	0	0	0	0	1.26431	0	0	0	0	1.26431	0	0	0	0	1.26431	1.26431	0	0	1.26431	0	0	0	0	0	0	0	0
695	GGAACCCGTGGAACAC.1_2	shGFPT2	0	0	0.561594	0	0	0.91906	0	0	1.56179	0	0.561594	0	0.561594	0	0	0	0	0	1.38975	0	0.561594	0	0.561594	0	1.38975	0.561594	1.18185	1.94986	0	0	0	0	0	0.561594	0	1.18185	0	0	0.561594	0.561594	0	0	0	0	0.561594	0.561594	0
700	GGAATGGCATCGGAGA.1_2	shGFPT2	0	0	0	0	0	0	0	0	0	0	0	0	0	0	0	0	0	0	0	0	0	0	0	0	0	0	2.11938	0	0	0	2.11938	0	0	0	0	2.11938	0	0	0	0	0	0	0	0	0	0	0
702	GGAATGGGTGGAGAAA.1_2	shGFPT2	0	0	0	0	2.07187	0	0	0	2.07187	0	0	0	0	0	0	0	0	0	2.07187	0	0	0	0	0	2.69997	0	0	0	0	2.07187	0	0	0	2.07187	2.07187	0	0	0	2.07187	0	0	0	0	0	2.07187	0	0
703	GGAATGGTCGAACTCA.1_2	shGFPT2	0	0	0	0	0	0	0	0	0	0	0	0	0	0	0	0	0	0	2.53004	0	0	0	0	0	1.35802	0	1.35802	0	0	0	0	0	1.35802	0	1.35802	0	1.35802	0	1.35802	0	0	0	0	1.35802	1.91354	0	0
705	GGAGGATAGCGTATAA.1_2	shGFPT2	0	0	0	0	0	2.41041	0	0	0	0	0	2.04886	0	0	0	0	0	0	3.64217	0	0	0	0	0	0	0	2.04886	0	0	0	0	0	0	0	0	0	1.47694	0	0	0	0	0	0	0	1.47694	1.47694	0
706	GGAGGATGTGGCAACA.1_2	shGFPT2	0	0	0	2.09495	0	0	0	0	0	0	0	0	1.51788	0	0	0	0	0	0	0	0	0	0	0	1.51788	0	2.72459	0	0	0	0	0	0	0	0	0	2.09495	0	0	0	0	0	0	0	0	0	0
708	GGATCTACAGTTCCAA.1_2	shGFPT2	0	0	0	2.65048	0	0	0	0	0	0	0	0	0	0	1.68398	0	0	0	2.27971	0	0	0	0	0	2.92035	0	0	1.16111	0	0	0	0	1.16111	0	0	0	0	0	1.16111	0	0	0	0	0	1.16111	0	0
709	GGATGTTCATTGGCAT.1_2	shGFPT2	0	0	1.25062	0	0	1.78926	0	0	0	0	0	1.25062	1.25062	0	1.78926	0	0	0	1.78926	0	0	0	0	0	1.25062	0	1.25062	2.39517	1.78926	0	1.78926	0	0	0	0	0	2.59992	0	1.25062	0	0	0	0	0	2.59992	0	0
710	GGATGTTGTAGATCGG.1_2	shGFPT2	0	0	0	0	0	0	0	0	0	0	2.25378	0	0	0	0.995005	0.995005	0	1.48376	1.48376	0	0	0	0	0	0.995005	0	0	0.995005	0	0	0	0	0	0.995005	0.995005	0	1.48376	0	0	0	0	0	0	0	0	0	0
713	GGCACGTGTCTATGAC.1_2	shGFPT2	0	0.603571	0.603571	0.977301	0	1.46199	0.603571	0	0.977301	0	0	0.977301	0	0	0	0	0	0	1.46199	0	0.603571	0	0	0	1.24873	0	0.603571	0.977301	0.977301	0	0	0	1.24873	0	0.603571	1.24873	1.46199	0	0.977301	0	0	0	0	0	0	0	0
714	GGCAGTCCAACCACGC.1_2	shGFPT2	0	0	0	0	0	1.88884	0	0	0	0	0	0	0	0	0	0	0	0	0	0	0	0	0	0	1.88884	0	0	2.50335	0	0	0	0	0	0	0	0	0	0	0	0	0	0	0	0	0	0	0
716	GGCGTCAGTCGGTACC.1_2	shGFPT2	0	0	0	0	0	0	0	0	0	0	0	2.04945	0	0	0	0	0	0	2.04945	0	0	1.47746	0	0	1.47746	1.47746	1.47746	2.04945	0	0	0	0	0	0	0	0	0	0	0	0	0	0	0	0	2.04945	0	0
718	GGCTTGGTCGTAGCCG.1_2	shGFPT2	0	0	0	1.57211	0	0	0	0	0	0	0	0	0	0	0	0	0	0	2.15566	0	0	0	0	1.57211	0	0	1.57211	0	0	0	0	0	0	0	0	0	2.52175	0	0	0	0	0	0	0	1.57211	0	0
720	GGGAAGTGTGCCTTTC.1_2	shGFPT2	0	0	0.558824	0	0	1.70324	0	0	1.17738	0	0	0.558824	0	0	0.558824	0	0	0.558824	0.915182	0	0	0	0	0	2.44066	0	1.17738	0.558824	0	0	0	0	0	0	0.558824	0.558824	1.38491	0	0.558824	0	0	0	0	0	1.55669	0	0
722	GGGACCTGTGTACATC.1_2	shGFPT2	0	0	1.91576	0	0	0	1.35996	0	0	0	1.35996	0	0	0	0	0	0	0	1.35996	0	0	0	0	0	3.39987	1.91576	2.2709	1.35996	1.35996	1.35996	0	0	1.35996	0	0	1.35996	2.2709	0	0	0	0	0	0	0	0	0	0
724	GGGAGTAAGCGCTGCT.1_2	shGFPT2	0	0	0	0	0	0	0	0	0	0	0	0	0	0	0	0	0	0	0	0	0	0	0	0	2.13731	0	0	1.55568	1.55568	0	0	0	0	0	0	2.50266	0	0	0	0	0	0	0	0	2.50266	0	0
727	GGGCCATCAACTCCCT.1_2	shGFPT2	0	0	0	1.6456	0	0	0	0	1.6456	0	0	1.6456	0	0	0	0	0	0	2.23732	0	0	0	0	0	2.60656	0	2.23732	0	0	0	0	0	0	0	0	0	1.6456	0	1.6456	0	0	0	1.6456	0	1.6456	0	0
729	GGGCGTTCACGTGTGC.1_2	shGFPT2	0	0	0	0.976269	0	0	0	0	0	0	0	0.976269	0	0	0	0	0	0	2.39126	0	0	0	0	0	0.976269	0	0.976269	1.46072	0	0	1.46072	0	0.976269	0	0	0.976269	0.976269	0	0	0	0	0	0.976269	0	0	0	0
730	GGGCTCAAGAAGCGCT.1_2	shGFPT2	0	0	0	0	0	0	0	0	0	0	0	0	0	0	0	0	0	0	1.66896	0	0	0	0	0	0	0	1.66896	0	0	0	0	0	0	0	0	0	2.63332	0	0	0	0	0	1.66896	0	0	0	0
732	GGGCTCAGTCCAGCGT.1_2	shGFPT2	1.21088	0	0	0.57969	0	0.944283	0	0.57969	0.57969	0	0	0.57969	0	0	0	0	0	0.944283	1.59482	0	0.57969	0	0.57969	0.944283	1.59482	0.944283	0.944283	0.57969	0.57969	0	1.42116	0	0	0.57969	0.944283	0.57969	1.98566	0	1.21088	0	0	0	0	0	1.59482	0	0
733	GGGTATTAGAAACTGT.1_2	shGFPT2	0	0	0	0.808576	0	0	0	0	1.5548	0	0	0.808576	0	0	0	0	0	0	2.39404	0	0	0	0	0	0	1.24974	1.24974	1.24974	0	0	0	0	0	0	0	0	1.24974	0	0.808576	0	0	0	0	0	1.5548	0	0
735	GGGTCACAGGAACATT.1_2	shGFPT2	1.15571	0	0	1.15571	0	1.15571	0	0	0	0	0	0	0	0	0	0	0	0	3.3001	0	1.15571	0	0	0	2.64317	0	2.01874	1.15571	0	0	1.15571	0	1.15571	0	1.15571	1.15571	0	0	0	0	0	0	1.15571	0	0	0	0
736	GGGTGAATCAATCTCT.1_2	shGFPT2	1.10749	0	0	1.10749	0	1.10749	0	0	0	0	0	1.62008	1.10749	0	1.10749	0	0	0	1.10749	0	0	0	0	0	1.95731	0	1.10749	1.62008	0	0	1.10749	0	1.10749	0	0	1.10749	1.10749	0	0	0	0	0	0	0	1.62008	0	0
738	GGGTTATAGGTAGACC.1_2	shGFPT2	0	2.29622	0	0	0	0	0	0	0	0	0	2.29622	0	0	0	0	0	0	0	0	0	0	0	0	0	0	0	0	0	0	0	0	0	0	0	0	0	0	0	0	0	0	0	2.29622	0	0	0
740	GGTAACTAGGAGAATG.1_2	shGFPT2	0	0	1.46352	0	0	0	0	0	1.46352	0	0	0	0	0	1.46352	0	0	0	3.18834	0	0	0	0	0	1.46352	0	0	0	0	0	0	0	0	0	0	0	0	0	0	0	0	0	0	0	1.46352	2.0337	0
741	GGTCACGTCCATTGCC.1_2	shGFPT2	2.47697	0	0	1.86448	0	0	0	0	0	0	0	0	0	0	0	0	0	0	2.85404	0	0	0	0	0	1.86448	0	1.86448	0	0	0	0	0	0	0	0	0	1.86448	0	0	0	0	0	1.86448	0	1.86448	1.86448	0
742	GGTCACGTCTACGCGG.1_2	shGFPT2	1.37016	0	0	0	0	0	0	0	0	0	0	0	0	0	0	0	0	0	2.2832	0	0	0	0	0	1.37016	0	0	1.37016	0	0	0	0	0	0	0	1.37016	1.92745	0	0	0	0	0	0	0	2.2832	1.92745	0
743	GGTCTGGAGTATGAGT.1_2	shGFPT2	0	0	0	0	0	0	0	0	0	0	0	0	0	0	0	0	0	0	1.69062	0	0	0	0	0	0	0	1.69062	2.28703	0	0	0	0	0	0	0	2.28703	2.65805	0	0	0	0	0	0	0	1.69062	1.69062	0
745	GGTGAAGAGACGGAAA.1_2	shGFPT2	0	1.21582	0	1.74852	0	0	0	1.21582	0	0	0	0	1.21582	0	0	0	0	1.21582	1.74852	0	0	0	1.21582	0	2.35063	0	1.74852	0	0	0	0	0	1.21582	0	0	0	1.21582	0	0	0	0	0	0	0	1.74852	1.21582	0
749	GGTGATTTCCAGTGTA.1_2	shGFPT2	0	0	0	0	0	0	0	0	0	0	0	1.4759	0	0	0	0	0	0	1.4759	0	1.4759	0	0	0	0	0	0	0	0	0	0	0	1.4759	0	0	0	1.4759	0	0	0	0	0	0	0	1.4759	1.4759	0
753	GGTGTCGCAGCCGGTT.1_2	shGFPT2	0	0	0	0	0	0	0	0	0	0	0	1.49198	0	0	0	0	0	0	2.42813	0	0	0	0	0	0	0	1.49198	0	0	0	0	0	0	0	1.49198	1.49198	0	0	0	0	0	0	0	0	1.49198	0	0
755	GGTTCTCCAAACACCT.1_2	shGFPT2	1.94522	0	1.38569	2.30187	0	0	0	0	0	0	0	1.38569	0	0	0	0	1.38569	0	2.77184	0	0	0	0	0	2.30187	0	1.94522	1.94522	0	0	2.30187	0	1.38569	0	0	0	3.43321	0	1.94522	0	0	0	0	1.38569	1.94522	1.38569	0
756	GGTTGTAAGTCGCCAC.1_2	shGFPT2	0	0	0	1.01387	0	2.28046	0	0	0	0	0	0	0	0	0	0	0	0	2.08255	0	0	0	0	0	1.50684	0	2.08255	1.01387	0	0	0	0	1.83557	0	0	0	1.01387	0	0	0	0	0	0	0	0	0	0
758	GTAACACGTTTGGAGG.1_2	shGFPT2	0.504221	0	0	0	0	0.684884	0	0	0.283559	0	0.283559	0.504221	0	0	0	0	0	1.19239	1.28724	0	0	0	0	0	0.97049	0	0.283559	0.283559	0	0	0.283559	0	0.283559	0	1.08758	0.283559	0	0	0.283559	0	0	0	0.504221	0.504221	1.19239	0.283559	0
761	GTAACCATCGCTAAAC.1_2	shGFPT2	2.5006	2.13534	0	1.55391	0	0	0	0	0	0	0	0	0	0	0	0	0	0	0	0	0	2.13534	0	0	0	0	1.55391	0	0	0	2.13534	0	1.55391	0	0	0	2.13534	0	0	0	0	0	0	0	1.55391	0	0
762	GTAAGTCCACTTACAG.1_2	shGFPT2	0	0.819923	1.5709	0	0	1.80522	0	0	0	0	2.15431	0	0	0	0	0	0	0.819923	0.819923	0	0.819923	0	0	0	1.26431	0	1.5709	1.80522	0	0	0.819923	0	0	0	0.819923	1.5709	1.26431	0	0.819923	0	0	0	0.819923	0	0.819923	0.819923	0
763	GTAATGCAGTCACTGT.1_2	shGFPT2	0	0	0	0	0	0.803026	0	0	1.24259	0	2.12748	0.803026	0	0	0	1.04677	0	0.480042	0.803026	0	0.480042	0	0	0	0.480042	0	1.24259	1.24259	0	0	0	0	0.480042	0	0	0.480042	1.24259	0	1.24259	0	0	0	0	0	1.24259	0.480042	0
764	GTAATGCGTAGAGACC.1_2	shGFPT2	0	0	0	0	0	0	0	0	0	0	0	1.98478	0	0	0	0	0	0	1.98478	0	0	0	0	0	0	0	1.98478	0	0	0	1.98478	0	0	0	0	0	0	0	0	0	0	0	0	0	0	0	0
767	GTAGAGGAGGATCACG.1_2	shGFPT2	0.827676	0	0	0	0	2.16653	0	0	1.81677	0	0.827676	0.827676	0	0	0	0	0	0	1.81677	0	1.58186	0	0	0	1.27424	0	0	0.827676	0.827676	1.27424	0	0	0.827676	0	0.827676	0.827676	0	0	2.00687	0	0	0	0	0	0.827676	0	0
768	GTAGAGGGTCAGTCGC.1_2	shGFPT2	0	0	0	1.89891	0	0	0	0	0	0	0	0	0	0	0	0	0	0	1.89891	0	0	0	0	0	0	0	0	0	0	0	0	0	0	0	0	2.51424	0	0	0	0	0	0	0	1.89891	0	0	0
770	GTAGATCTCCATTCAT.1_2	shGFPT2	0	2.34421	0	0	0	0	0	0	0	0	0	2.34421	0	0	0	0	0	0	0	0	0	0	0	0	0	0	2.34421	0	0	0	0	0	0	0	0	0	0	0	0	0	0	0	0	2.34421	0	0	0
772	GTAGTACAGCATTTGC.1_2	shGFPT2	0	1.23002	0	0	0	0	0.793288	0	1.23002	0	0	0.793288	0	0	0	0	0	0	2.47619	0	0.793288	0.793288	0	0	1.23002	1.53298	1.23002	1.53298	0.793288	2.1119	0.793288	0	0	0	0	1.23002	0	0	0.793288	0	0	0	0	0	1.95349	0	0.793288
774	GTATTTCCAGAGCGTA.1_2	shGFPT2	0	0	0	0	0	1.58483	0	0	0.829785	0	2.01011	1.27694	0	0	0	0	0	0	1.27694	0	0	0	0	0	0.829785	0	0	0.829785	0	0	0	0	0	0	0	0	1.81991	0	0.829785	0	0	0	0	0	1.81991	0	0
775	GTATTTCTCCTACCGT.1_2	shGFPT2	0	0	0	1.54952	0	1.54952	0	0	0	0	0	0	0	0	0	0	0	0	1.54952	0	0	0	0	0	2.13042	0	0	1.54952	0	0	0	0	0	0	0	1.54952	0	0	1.54952	0	0	0	0	1.54952	0	0	0
777	GTCAAACGTTCCTAAG.1_2	shGFPT2	0	0	0	0	0	1.46327	0	0	0	0	0	2.03341	1.46327	0	0	0	0	0	1.46327	0	0	1.46327	0	0	0	0	0	0	0	0	0	0	1.46327	0	0	0	0	0	1.46327	0	0	0	0	0	0	0	0
778	GTCAAGTTCCGTGTCT.1_2	shGFPT2	0	0	0	1.8294	0	0	0	0	0	0	0	0	0	0	0	0	0	0	0	0	0	0	0	0	1.8294	0	0	0	0	0	0	0	0	0	0	1.8294	1.8294	0	0	0	0	0	0	0	0	0	0
779	GTCACGGAGTGAATAC.1_2	shGFPT2	0	0	0	0	0	1.25027	0	0	0	0	0	0	0	0	0	0	0	0	2.13698	0	0	0	0	0	2.39472	0	0	1.78885	0	0	0	0	0	0	0	0	0	0	0	0	0	0	0	0	0	0	0
784	GTCAGCGAGTACCCTA.1_2	shGFPT2	0.823207	1.99999	1.26852	1.57555	0	0.823207	1.26852	0	0.823207	0	0	0.823207	0.823207	0	0.823207	0	0	0	2.15949	0	0	0	0	0	1.57555	0.823207	0	0	0	0	1.57555	0	0.823207	0	0	1.26852	1.81012	0	1.99999	0	0	0	0	0	1.81012	0	0
790	GTCGTAAAGGAATTAC.1_2	shGFPT2	0	0	0	0	0	1.96106	0	0	0	0	0	1.39956	0	0	0	0	0	0	0	0	0	0	0	0	0	0	0	0	0	0	0	0	0	0	0	1.39956	2.96117	0	0	0	0	0	0	0	0	0	0
791	GTCTACCGTACTCCGG.1_2	shGFPT2	2.01987	0	0	1.15661	0	0	0	0	0	0	0	0	0	0	0	0	0	0	2.01987	0	0	0	0	0	0	0	0	0	0	0	1.15661	0	0	0	0	0	0	0	1.15661	0	0	0	0	1.15661	2.01987	0	0
794	GTCTTTAAGCAGGCTA.1_2	shGFPT2	0	0	0	0.945484	0	0	0	0	0	0	0	0	0	0	0	0	0	0	1.74435	0	0	0	0	0	2.34606	0	1.98736	1.42265	0	0	0	0	0	0	0	0.945484	0.945484	0	2.18271	0	0	0	0	0	0	0	0
795	GTCTTTAGTTCCATTT.1_2	shGFPT2	0	0	0	2.63212	0	0	0	0	0	0	0	0	3.01332	0	0	0	0	0	0	0	0	0	0	0	2.63212	0	2.63212	0	0	0	2.00843	0	0	0	0	0	2.00843	0	0	2.00843	0	0	0	0	0	0	0
798	GTGAGCCTCCCTCTTT.1_2	shGFPT2	1.63754	1.12208	1.12208	1.63754	0	1.12208	0	0	0	0	0	0	0	0	0	0	0	0	1.12208	0	0	0	1.12208	0	1.12208	0	1.12208	1.97599	0	0	0	0	1.12208	1.12208	0	0	0	0	0	0	0	0	0	0	1.12208	0	0
801	GTGAGTTGTAGTGGCA.1_2	shGFPT2	1.55333	1.55333	0	0	0	0	0	0	0	0	0	0	1.55333	0	0	0	0	0	3.42808	0	0	0	0	0	0	0	0	0	0	0	0	0	0	0	0	1.55333	0	0	0	0	0	0	1.55333	1.55333	2.13468	0	0
802	GTGAGTTGTGACTAAA.1_2	shGFPT2	0	0	0	0.973391	0	0	0	0	0	0	0	0.973391	0	0	0	0	0	0	0	0	0	0	1.45717	0	1.45717	0	0.973391	0	0	0	0	0	0	0	0.973391	0	0	0	0.973391	0	0	0	0	0	0	0.973391	0
805	GTGCACGGTAACAAGT.1_2	shGFPT2	1.31402	1.31402	0	0	0	0	0	0	0	0	0	0	0	0	0	0	0	0	0	0	0	0	0	0	1.31402	0	0	0	0	0	0	0	1.31402	1.31402	0	1.31402	1.31402	0	0	0	0	0	0	0	2.2152	1.86287	0
806	GTGCACGGTCTGTTAG.1_2	shGFPT2	0.966274	0.966274	0	0.966274	0	0.966274	0	0	0	0	0	0	0	0	0	0	0	0	0	0	0.966274	0	0.966274	0	2.01657	1.44839	0.966274	0	0.966274	0	0	0	0	0	0	0.966274	2.01657	0	0	0	0	0	0	0	0	0.966274	0
807	GTGCACGTCCTCTAGC.1_2	shGFPT2	1.47851	0	0	1.47851	0	0	0	0	0	0	0	0	0	0	0	0	0	0	3.55145	0	0	0	0	0	2.41226	0	0	0	0	0	0	0	0	0	0	0	2.41226	0	0	1.47851	0	0	0	0	1.47851	0	0
810	GTGCTGGAGCGCTGAA.1_2	shGFPT2	1.40002	0	0	1.40002	0	0	0	0	0	0	1.40002	0	0	0	0	0	0	0	3.23642	0	0	0	0	0	0	0	1.96159	0	0	0	1.96159	0	0	0	0	1.96159	0	0	0	1.40002	0	0	0	0	0	0	0
811	GTGCTGGCACGTAGAG.1_2	shGFPT2	0	0	0	0	0	1.59051	0	0	0	0	0	0	0	0	0	0	0	0	2.54308	0	0	0	0	0	1.59051	0	1.59051	0	0	0	0	0	0	0	0	1.59051	1.59051	0	0	0	0	0	0	0	0	0	0
815	GTGGGAAGTTCGAACT.1_2	shGFPT2	1.65959	0	0	1.65959	0	1.65959	0	0	0	0	0	0	0	0	0	1.65959	0	0	2.89196	0	0	0	0	0	2.25279	0	2.25279	0	0	0	0	0	0	0	0	1.65959	0	0	1.65959	0	0	0	0	0	1.65959	0	0
816	GTGGGAATCCGTAGTA.1_2	shGFPT2	0	0	0	0	0	0	0	0	1.19494	0	2.69598	0	0	0.766247	0	1.49403	0	1.19494	1.49403	0	0	0	0	1.19494	1.19494	0	0	1.19494	0	0	0	0	0	0	0.766247	0	0	0	0	0	0	0	0	0	0	0	0
817	GTGTAACCAAATCAAG.1_2	shGFPT2	1.27778	0	0	1.27778	0	0	0	0	0	0	1.27778	0	0	0	0	0	0	0	3.07774	0	0	0	0	0	1.27778	0	0	0	0	0	2.17088	0	0	0	1.82089	1.27778	2.8053	0	0	0	0	0	0	0	0	0	0
821	GTGTGGCTCATTACTC.1_2	shGFPT2	0	0	0	0	0	0	0	0	1.2508	0	0	0	1.2508	0	1.2508	0	0	0	2.91517	0	0	0	0	0	0	0	1.78947	1.2508	0	0	0	0	0	0	0	1.2508	1.78947	0	0	1.2508	0	0	1.2508	0	2.13764	0	0
824	GTTACAGGTGCCCTTT.1_2	shGFPT2	2.19226	0	0	1.60497	0	0	1.60497	0	0	0	0	0	0	0	0	0	0	0	0	0	1.60497	0	0	0	0	0	1.60497	0	0	0	0	0	0	0	0	2.19226	0	0	0	0	0	0	0	0	0	0	0
826	GTTACGAGTAGTCACT.1_2	shGFPT2	0	0	0	0	0	2.22471	0	0	0	0	0	0	0	0	0	0	0	0	2.8623	0	0	0	0	0	2.22471	0	0	0	0	0	0	0	0	2.22471	0	0	0	0	0	0	0	0	0	2.22471	2.22471	0	0
834	GTTCGCTCACGCTGTG.1_2	shGFPT2	0	0	0	0	0	0	0	0	0	0	0	0	0	0	0	0	0	0	0	0	0	0	0	0	0	0	2.25317	0	0	0	0	0	0	0	0	0	2.25317	0	0	0	0	0	0	0	0	0	0
837	GTTGTCCTCCTAAGTG.1_2	shGFPT2	0	0.348454	0.348454	0	0	1.55854	0	0	0.606363	0	1.79218	0.981142	0.348454	0	0	0.606363	0	1.36561	0.606363	0	0.606363	0	0	0	1.12635	0	0.348454	0.606363	0	0	0.811208	0	1.25312	0	0.606363	0.348454	1.36561	0	0	0.348454	0	0	0	0	1.7202	0.348454	0
839	TAACCAGCACGCGCAT.1_2	shGFPT2	0	0	0	0	0	3.12086	0	0	0	0	0	0	0	0	0	0	0	1.22593	1.22593	0	1.22593	0	0	0	2.10681	1.22593	1.22593	1.76038	1.22593	0	0	0	0	0	0	0	1.22593	0	1.22593	0	0	0	1.22593	1.22593	1.76038	0	0
843	TAAGCCAAGTATTAGG.1_2	shGFPT2	0	0.43792	0.43792	0	0	1.871	0	0	0	0	0.43792	0.741443	0	0	0	0	0	0.43792	0.741443	0	0	0	0	0	0.741443	0	0.741443	0.973972	0	0	0.43792	0	0.741443	0.43792	1.1625	0.741443	1.45789	0	1.1625	0	0	0	0	0	1.32106	0.973972	0
844	TAAGCCACACAGCCTG.1_2	shGFPT2	0.295842	0.52385	0.295842	0.52385	0	0	0	0	0.52385	0	1.63532	0.295842	0.295842	0.295842	0.295842	0.295842	0	1.22665	1.00111	0	0	0	0.295842	0	1.56587	0	1.12023	0.865852	0	0	0.52385	0	0	0	1.00111	0.295842	1.00111	0	0.865852	0	0	0	0	0	1.41058	0.295842	0
845	TAAGCCAGTCCGACGT.1_2	shGFPT2	0	1.97136	0	2.59234	0	0	0	0	0	0	0	0	1.97136	0	1.97136	0	0	0	3.24734	0	0	0	0	0	2.59234	0	0	1.97136	0	0	0	0	1.97136	0	0	0	1.97136	0	0	0	0	0	0	0	0	0	0
846	TAAGTCGGTGGGCTCT.1_2	shGFPT2	0	0	1.24145	0	0	0	0	0	0	0	0	0	1.24145	0	1.24145	0	0	0	2.90276	0	0	0	0	0	1.24145	0	1.24145	0	0	0	0	0	0	0	0	0	2.12607	0	0	0	0	0	0	0	0	0	0
847	TAAGTCGGTGTGTTTG.1_2	shGFPT2	0	0	0	0	0	0	0	0	0	0	0	0	0	0	0	0	0	0	1.7216	0	0	0	0	0	2.6933	0	1.7216	0	0	0	0	0	0	0	0	0	2.32111	0	0	0	0	0	0	0	0	0	0
850	TACACCCAGTGAGGTC.1_2	shGFPT2	1.41388	0	0	1.41388	0	0.938418	0	0	0	0	2.3356	0.938418	0	0	0	0	0	1.7348	0.938418	0	0	0	0	0	1.41388	0	0	0.938418	0	0.938418	0.938418	0	0	0.938418	0.938418	0	0	0	0.938418	0	0	0	0	0.938418	0	1.41388	0
852	TACACCCTCCCAAGTA.1_2	shGFPT2	0	1.61008	0	1.61008	0	1.61008	0	0	0	0	0	0	0	0	1.61008	0	0	0	1.61008	0	1.61008	0	0	0	2.19794	0	1.61008	0	0	0	0	0	1.61008	0	0	0	0	0	2.83397	0	0	0	0	0	0	0	0
853	TACAGGTAGCGCCTTG.1_2	shGFPT2	1.79762	1.25779	1.25779	0	0	1.25779	0	0	0	0	1.79762	0	0	0	0	0	0	0	0	0	0	0	0	0	3.35668	1.25779	1.25779	0	2.14627	2.14627	1.25779	0	0	0	0	1.25779	0	0	0	0	0	0	0	0	2.14627	0	0
854	TACAGGTTCCACATAG.1_2	shGFPT2	0.683683	0	0.683683	0.282961	0	1.37206	0	0	0.683683	0	0.282961	0	0.282961	0	0.282961	0.503262	0	0.683683	0.683683	0	0	0	0	0	1.28549	0	1.08597	0.503262	0	0	0.683683	0	0.282961	0	0	1.1907	1.08597	0	0.683683	0	0	0	0.282961	0.503262	1.37206	0	0
862	TACCGGGCATACCACA.1_2	shGFPT2	1.74891	1.74891	0	0	1.21615	2.09464	0	0	0	0	0	0	0	0	0	0	0	0	1.74891	0	0	0	0	0	1.74891	1.21615	1.74891	0	0	0	0	0	1.21615	0	0	1.21615	0	0	0	0	0	0	1.21615	0	1.21615	1.21615	0
863	TACCGGGGTTGACGGA.1_2	shGFPT2	0	0	0	1.61243	0	1.302	1.61243	0	0	0	0.849437	0.849437	0	0	0	0	0	0	2.04014	0	0	0	0.849437	0	2.04014	0	0.849437	0	0	0	0	0	0	0	0	0.849437	1.61243	0	1.84898	0	0	0	0.849437	0	1.61243	0	0
864	TACCTCGAGCCGCACT.1_2	shGFPT2	0	1.01387	0	1.50684	0	0	1.01387	0	0	0	1.01387	0	0	0	0	0	0	0	2.28046	0	0	0	0	0	1.01387	0	1.83557	1.50684	0	0	1.50684	0	0	0	1.50684	1.01387	2.08255	0	1.01387	0	0	0	0	1.01387	1.83557	0	1.01387
865	TACCTCGAGGCGAACT.1_2	shGFPT2	0	0	0	0	0	0	0	0	0	0	0	0	0	0	0	0	0	0	3.56905	0	0	0	0	0	2.52527	0	1.90912	0	0	0	0	0	0	0	0	1.90912	0	0	0	0	0	0	0	0	2.52527	0	0
866	TACCTCGGTAATGTGA.1_2	shGFPT2	0	0	0	1.31541	0	0	0	0	0	0	0	0	1.86448	0	1.86448	0	0	0	0	0	0	0	0	0	2.85404	0	2.2169	0	0	0	0	0	0	0	0	2.2169	2.2169	0	1.31541	0	0	0	0	0	1.31541	0	0
867	TACCTCGTCGGCATCG.1_2	shGFPT2	0	0	0	2.15972	0	2.15972	0	0	0	0	0	1.57575	1.57575	0	0	0	0	0	3.00428	0	0	0	0	0	2.15972	1.57575	0	0	0	0	0	0	0	0	0	0	3.32649	0	1.57575	0	0	0	0	1.57575	0	0	0
868	TACCTGCAGTGGAAAG.1_2	shGFPT2	0	0	0	0	0	0	0	0	2.41072	0	0	0	0	0	0	0	0	0	0	0	0	0	0	0	0	0	1.4772	0	0	0	0	0	0	0	0	0	0	0	0	0	0	0	0	0	0	0	0
869	TACGGGCAGGGAGATA.1_2	shGFPT2	1.21598	0	0	0	0	0	0	0	0	0	0	1.21598	0	0	0	0	0	0	1.21598	0	0	0	0	0	1.74871	0	1.74871	0	0	0	1.21598	0	0	0	0	1.21598	1.74871	0	0	0	0	0	0	0	0	1.21598	0
875	TACTTGTCAAACTAGA.1_2	shGFPT2	0	0	0	0	0	1.55039	1.55039	0	1.55039	0	0	0	0	0	0	0	0	0	2.49651	0	1.55039	0	0	0	2.49651	0	1.55039	1.55039	0	0	0	0	0	1.55039	0	1.55039	2.97383	0	0	0	0	0	0	0	2.1314	0	0
880	TAGGAGGCAACAGCTT.1_2	shGFPT2	1.26113	0	0	0	0	0.817443	0	0	0	0	0	0.817443	0	0	0	0	0	0	2.70215	0	0.817443	0	0	0	1.56739	0	1.26113	0	0	0	0	0	0.817443	0	0	0.817443	1.26113	0	0	0	0	0	0	0.817443	1.56739	0	0
882	TAGGTACTCACTTGTT.1_2	shGFPT2	0.487124	0.813264	0.487124	0.487124	0	0.813264	0.813264	0	0	0	1.56146	1.42025	0	0	0	0	0	0	0.487124	0	0	0	0	0	1.25576	0	0.487124	0	1.98462	0.487124	0.487124	0	0.487124	0.487124	0.487124	1.79526	1.42025	0	1.25576	0	0	0	0.487124	0	1.56146	0	0
883	TAGGTTGCAGGGACTA.1_2	shGFPT2	0	0	0	0	0	0	0	0	0	0	0	0	0	0	0	0	0	0	2.91966	0	0	0	0	0	1.79343	0	0	0	0	0	1.25419	0	1.79343	0	0	0	1.25419	0	1.25419	0	0	0	0	0	1.79343	0	0
884	TAGTGCAGTAAGACCG.1_2	shGFPT2	0	0	0	0	0	1.23037	0	0	0	0	0	0	0	0	0	0	0	0	2.3693	0	1.23037	0	0	0	3.31953	0	1.23037	0	0	0	0	0	0	0	0	1.23037	2.3693	0	0	0	0	0	1.23037	0	1.23037	1.23037	0
885	TATACCTTCTTTGCGC.1_2	shGFPT2	0.906973	0.400299	0	0.685388	0	1.59699	0	0	0.906973	0	0.685388	0	0	0	0.400299	0	0	0	0	0	0	0	0.400299	0	1.37463	0	0.685388	0.906973	0	0	0	0	0.400299	0.400299	0.400299	0.685388	0.685388	0	0.685388	0.400299	0	0	0	0.400299	0.400299	0	0
887	TATCAGGAGATGGTAT.1_2	shGFPT2	1.80734	0	0	1.80734	0	0	0	0	0	0	0	0	0	0	0	0	0	0	0	0	0	0	0	0	0	0	0	0	0	0	2.41489	0	0	1.80734	0	1.80734	0	0	1.80734	0	0	0	1.80734	0	0	0	0
888	TATCAGGCAGTTGTTG.1_2	shGFPT2	0	0	0	2.51947	0	0	0	0	0	0	0	1.90375	0	0	0	0	0	0	0	0	0	0	0	0	0	0	1.90375	1.90375	0	0	0	0	0	0	0	2.51947	1.90375	0	0	0	0	0	0	0	0	0	0
893	TCAAGCAGTTCAAACC.1_2	shGFPT2	0.754958	0.754958	0	1.47763	0	0	0	0	0	0	0	0	0	0	0	0	0	0	1.89275	0	0	0	0	0	0	0	0.754958	0.754958	0	0	2.04964	0	0	0	0	0	0.754958	0	0	0	0	0	0	0	1.18021	0.754958	0
894	TCAAGTGAGCTGGCCT.1_2	shGFPT2	2.0937	0	0	2.0937	0	0	0	0	0	0	0	1.51676	0	0	1.51676	0	0	0	3.10659	0	0	0	1.51676	0	1.51676	0	0	2.0937	0	0	0	0	1.51676	0	1.51676	1.51676	3.10659	0	0	0	0	0	0	0	2.72325	2.0937	0
895	TCAATCTAGCAGCCTC.1_2	shGFPT2	0.487075	0.487075	1.05871	1.56136	0	0	0	0	0.487075	0.487075	0.813194	1.42015	0	0.487075	0	0	0.487075	0.813194	0.487075	0	1.05871	0	0	0	1.79515	0.487075	1.05871	1.05871	0	0.487075	0.487075	0	0.487075	0	1.25567	0.487075	1.25567	0	0	0	0	0.813194	0.487075	0	1.05871	0.813194	0
896	TCAATTCAGCAATAGT.1_2	shGFPT2	0	0	0	0	0	1.52402	0	0	1.52402	0	0	0	0	0	0	0	0	0	0	0	0	0	0	0	0	0	1.52402	1.52402	0	0	0	0	0	1.52402	0	1.52402	1.52402	0	1.52402	0	0	0	0	0	0	0	0
897	TCAATTCGTTCGGCCA.1_2	shGFPT2	0.681528	0	0	0.397734	0	0.681528	0	0	0	0	1.08309	0.902332	0	0	0	0	0	1.23612	0	0	0.902332	0	1.08309	0	0.681528	0	0.681528	0.397734	0	0	0.397734	0	0.397734	0	0.681528	1.08309	1.23612	0	0	0	0	0	0	0.397734	1.59078	0.681528	0
898	TCACAAGAGGAATGTT.1_2	shGFPT2	1.01431	1.01431	0	1.01431	0	1.50739	0	0	0	0	0	0	0	0	0	0	0	1.50739	1.01431	0	0	0	0	0	0	0	0	0	0	0	0	0	0	1.01431	0	0	1.01431	0	0	0	0	0	0	0	0	0	0
899	TCACAAGCAGCGAACA.1_2	shGFPT2	0	0	0	0	0	0	0	0	0	0	0	1.58463	0	0	1.58463	0	0	0	2.80396	0	0	0	0	0	2.16962	0	2.53627	0	0	0	1.58463	0	0	0	0	0	1.58463	0	1.58463	0	0	0	0	0	1.58463	0	0
901	TCACACCCACAGCGCT.1_2	shGFPT2	0	0	0	0	0	0	0	0	0	0	0	0	0	0	0	0	0	0	1.28473	0	1.28473	0	0	0	3.3009	0	1.28473	1.82896	0	0	1.28473	0	0	0	0	1.82896	0	0	0	0	0	0	1.28473	0	1.28473	1.28473	0
902	TCACTATCAGATCATC.1_2	shGFPT2	0.531298	0.531298	0.531298	0.300526	0	1.01264	0	0	0.718673	0	0	0.718673	0	0	0.300526	0.531298	0	1.01264	0.876418	0	0.300526	0	0	0	1.1325	0	0.876418	0.531298	0.718673	0	0.300526	0	0.531298	0	0.876418	0.300526	0.300526	0	0.531298	0	0	0	0	0.531298	0.531298	0	0
904	TCAGCCTCATAACAGA.1_2	shGFPT2	0	0	0	0	0	2.75541	0	0	0	0	0	0	0	0	0	0	0	0	2.75541	0	0	0	0	0	0	0	0	0	0	0	2.75541	0	0	0	0	0	0	0	0	0	0	0	0	0	0	0	0
906	TCAGGTAGTTGGGACA.1_2	shGFPT2	0	0	0	0	0	1.45793	0	0	0	0	0	1.45793	0	0	0	0	0	0	3.18136	0	0	0	0	0	1.45793	0	1.45793	0	0	0	0	0	0	0	0	0	2.65242	0	1.45793	0	0	0	0	0	1.45793	0	0
907	TCAGTCCCATAGAAAC.1_2	shGFPT2	0.943037	0.943037	1.20945	1.20945	0	0.578793	0	0	1.20945	0	0.578793	0.578793	0	0	0	0	0	1.20945	1.20945	0	0	0	0	0	1.20945	0.578793	0.943037	1.20945	0.943037	1.20945	0.578793	0	0	0	0	0.578793	1.41962	0	0.578793	0	0	0	0	0.578793	0.943037	0.578793	0
908	TCAGTGAGTTCCACGG.1_2	shGFPT2	1.38412	0	0	0	0	1.94343	0	0	1.38412	0	0	1.38412	0	0	0	0	0	0	2.56228	0	0	0	0	0	1.38412	0	0	1.94343	0	0	0	0	0	0	0	1.38412	2.9417	0	0	0	0	0	0	0	2.56228	0	0
910	TCAGTTTGTCGGAAAC.1_2	shGFPT2	0	0	0	0	0	0	0	0	0	0	0	0	0	0	0	0	0	0	0	0	0	0	0	0	2.26662	0	0	0	0	0	0	0	0	0	0	0	3.88274	0	0	0	0	0	0	0	1.67211	0	1.67211
911	TCAGTTTGTGGATCGA.1_2	shGFPT2	0	0	0	1.5215	0	0	0	0	0	0	0	0	0	0	0	0	0	0	2.93892	0	0	0	0	0	1.5215	0	0	0	0	0	0	0	0	0	0	1.5215	1.5215	0	0	0	0	0	0	0	0	0	0
914	TCATATCTCACGAGGA.1_2	shGFPT2	1.68095	1.15855	1.15855	0	0	0	0	0	0	0	0	0	1.68095	0	0	0	0	1.15855	0	0	0	0	0	0	2.47877	0	0	1.15855	0	0	2.79099	0	0	0	0	0	0	0	0	0	0	0	1.15855	0	0	0	0
915	TCATCCGAGACTCATC.1_2	shGFPT2	0	0	0	0	0	1.44454	0.963158	0	1.44454	0.963158	0	0	0	0	0	0	0	0	0	0	0	0	0	0	0	0.963158	0.963158	1.44454	0	0	0	0	0	0.963158	0	0.963158	0.963158	0	0	0	0	0	0.963158	0.963158	2.37209	0.963158	0
919	TCATGCCGTAACCAGG.1_2	shGFPT2	0	0	0	0.798563	0	0	0	0	0.798563	0	0	0	0.798563	0	0	0	0	0	1.23683	0	0	0	0	0	1.23683	1.23683	1.54052	0	0	0	0	0	1.23683	0.798563	0	0.798563	1.54052	0	0	0	0	0	0	0.798563	1.23683	0	0
920	TCATGGACACTGCACG.1_2	shGFPT2	0	0	0	0	0	0	0	0	0	0	0	0	0	0	0	0	0	0	0	0	0	0	0	0	0	0	2.15904	0	0	0	2.15904	0	0	0	0	0	0	0	0	0	0	0	2.15904	0	0	0	0
921	TCATGTTGTTTACGAC.1_2	shGFPT2	0	0	0	1.29522	1.60497	2.03203	0.844111	0	0.844111	0	0	0	0	0	0.844111	0	0.844111	0	0.844111	0	0	0.844111	0	0	1.60497	0	0.844111	1.60497	1.60497	0	0	0	0	0	0	0.844111	1.29522	0	0.844111	0	0	0	0	0.844111	1.84113	0	0
922	TCATTCACATCCTTCG.1_2	shGFPT2	1.64593	0	0	0	0	1.64593	0	0	1.64593	0	0	0	0	0	0	0	0	0	1.64593	0	0	0	0	0	0	0	0	0	0	0	1.64593	0	0	0	0	0	2.23769	0	0	0	0	0	0	0	0	0	0
923	TCATTCATCGGTAAGG.1_2	shGFPT2	0	0	0	0	0	0	0	0	0	0	0	1.71447	0	0	0	0	0	0	1.71447	0	0	0	0	0	1.71447	0	1.71447	0	0	0	0	0	0	0	0	0	0	0	1.71447	0	0	0	0	0	0	0	0
925	TCATTGTTCTGCTTAT.1_2	shGFPT2	1.12125	1.12125	0.710171	0	0	0	0	0	1.12125	0.710171	0	0	0	0	0	0	0	0.710171	2.80428	0	0	0	0	0	2.59616	1.41172	0.710171	1.41172	0	0.710171	1.12125	0	1.41172	1.12125	0	0	0.710171	0	1.12125	0	0.710171	0	1.12125	0	1.97492	1.12125	0
926	TCCAGAACATGGGAAC.1_2	shGFPT2	1.61168	0	0	1.10048	0	1.94831	0	0	0	0	0	0	0	0	0	1.10048	0	0	1.10048	0	0	0	0	0	1.61168	0	1.10048	1.10048	0	0	1.10048	0	0	0	0	1.94831	2.19972	0	1.10048	0	0	0	0	0	0	0	0
928	TCCATCGTCAGCTTGA.1_2	shGFPT2	0	0	0	0	0	1.79134	0	0	0	0	0	0	0	0	0	0	0	0	1.79134	0	0	0	0	0	0	0	1.79134	0	0	0	0	0	0	0	0	0	1.79134	0	0	0	0	0	0	0	0	1.79134	0
931	TCCCACAGTACTCCGG.1_2	shGFPT2	0	0	0	0	0	0	0	0	0	0	0	0	0	0	2.07887	0	0	0	2.07887	0	0	0	0	0	0	0	2.07887	0	0	0	0	0	1.50357	0	1.50357	0	1.50357	0	0	0	0	0	0	0	2.07887	0	0
932	TCCCACAGTTCGGCCA.1_2	shGFPT2	0	1.17833	0	0.753527	0.753527	1.89046	0	0	0	0	0	0	0	0	0	0	0	0	2.04729	0	1.17833	0	0	0	1.47555	1.89046	1.17833	1.17833	0.753527	0	1.17833	0	0	0	0.753527	0.753527	1.70437	0	1.47555	0	0	0	0	0	1.89046	0.753527	0
934	TCCCAGTCAATACGAA.1_2	shGFPT2	1.0817	0	1.58911	0	0	1.0817	0	0	0	0	0	0	0	0	0	0	0	0	2.54146	0	0	0	0	0	0	0	0	0	0	0	0	0	1.0817	0	0	1.0817	1.0817	0	1.0817	0	0	0	1.0817	1.58911	1.58911	0	0
937	TCCGATCTCCACGTCT.1_2	shGFPT2	0	1.04713	1.04713	0	0	1.04713	1.04713	0	1.87922	0	0	0	0	0	0	0	0	0	2.32701	0	0	0	0	0	0	0	1.04713	1.04713	0	0	0	0	0	0	0	1.54733	0	0	0	0	0	0	0	0	1.54733	0	1.04713
938	TCCTAATCAACAGATA.1_2	shGFPT2	0	0	0	0	0	0	0	0	0	0	0	0	0	0	0	0	0	0	0	0	0	0	0	0	1.6589	0	1.6589	2.25203	0	0	0	0	0	0	0	1.6589	2.25203	0	0	0	0	0	0	0	0	0	0
939	TCCTAATCATACCATG.1_2	shGFPT2	0	1.63057	0	0	0	0	0	0	0	0	0	0	0	0	0	0	0	0	0	0	0	0	1.63057	0	0	0	1.63057	0	2.22068	0	0	0	0	0	0	1.63057	0	0	0	0	0	0	0	1.63057	0	0	0
940	TCCTCGAAGCTTTCCC.1_2	shGFPT2	0	0	0	0	0	0	0	0	0	0	0	0	0	0	0	0	0	0	1.55539	0	0	0	0	0	2.76931	0	0	1.05378	0	0	0	0	1.55539	0	1.05378	0	2.8801	0	2.13698	0	0	0	0	0	1.05378	1.05378	0
942	TCCTCGATCCGCGAGT.1_2	shGFPT2	0	0	0	2.88382	0	0	0	0	0	0	0	0	0	0	0	0	0	0	3.15742	0	0	0	0	0	0	1.89122	0	0	0	0	1.89122	0	0	0	0	0	0	0	1.89122	0	0	0	0	0	0	0	0
943	TCCTTTCAGAACCCGA.1_2	shGFPT2	0	0	0	1.22865	0	0	0	0	0	0	0	1.22865	0	0	0	0	0	0	1.76357	0	0	0	0	0	0	0	1.76357	0	0	0	0	0	1.22865	0	0	1.22865	1.22865	0	0	0	0	0	0	0	1.76357	0	0
944	TCCTTTCGTGAACTAA.1_2	shGFPT2	0	0.627531	0.627531	0.627531	0	1.67988	0	0	1.01013	0	0	0	0	0	0.627531	0.627531	0	0.627531	1.96162	0	0.627531	0	0	0	1.50228	1.28618	1.01013	1.50228	1.28618	1.28618	0.627531	0	0.627531	0	0	1.28618	1.28618	0	1.01013	0.627531	0	0	0.627531	0.627531	1.50228	0.627531	0
948	TCGATTTCAGCTGAGA.1_2	shGFPT2	0	0	0	0	0	1.1413	0	0	1.1413	0	0	2.00047	0	0	0	0	0	0	2.62358	0	0	0	0	0	1.66045	0	1.66045	0	0	0	0	0	1.1413	0	0	0	1.1413	0	0	0	0	0	0	0	1.1413	1.1413	0
949	TCGATTTTCTGGGTCG.1_2	shGFPT2	0	0	0	0	0	0	0	0	0	0	0	0	0	0	0	0	0	1.15259	0	0	0	0	0	0	0	0	1.15259	0	0	0	1.67387	0	0	0	1.15259	0	2.01479	0	0	0	0	0	0	0	1.67387	0	0
951	TCGCACTGTAGACTGG.1_2	shGFPT2	1.63921	0	0	1.63921	0	0	0	0	0	0	0	0	1.63921	0	0	0	0	0	2.86815	0	0	0	0	0	2.23025	0	2.23025	0	0	0	1.63921	0	0	0	0	0	1.63921	0	1.63921	0	0	0	0	0	0	0	0
954	TCGCAGGGTATGCTAC.1_2	shGFPT2	0	0	0	0	0	0	0	0	0	0	0	0	0	0	0	0	0	0	0	0	0	0	0	0	0	0	0	0	0	0	1.65341	0	0	0	1.65341	0	1.65341	0	1.65341	0	0	0	0	0	0	0	0
957	TCGGATAGTTATGTCG.1_2	shGFPT2	0	0	0	0	0	1.9101	0	0	0	0	1.9101	0	0	0	0	0	0	0	2.52633	0	0	0	0	0	2.90478	1.9101	0	2.90478	0	0	0	0	0	0	0	0	0	0	0	0	0	0	0	0	0	0	0
961	TCGGGTGCAGTCGAGA.1_2	shGFPT2	0	0	1.00193	1.8198	0	0	0	0	1.00193	0	1.00193	0	0	0	1.00193	0	0	0	2.80408	0	0	0	0	0	1.00193	0	2.06613	1.8198	0	0	1.00193	0	0	0	0	1.49225	2.80408	0	0	0	0	0	0	0	1.49225	0	0
964	TCGTCCACAGAGTCAG.1_2	shGFPT2	0	2.5576	0	0	0	0	0	0	0	0	0	0	0	0	0	0	0	0	0	0	0	0	0	0	0	2.5576	0	0	0	0	0	0	0	0	0	2.5576	0	0	0	0	0	0	0	0	0	0	0
968	TCTAACTTCTCAGAAC.1_2	shGFPT2	0	0	1.07517	0	0	1.91567	0	0	0	0	0	0	0	0	0	0	0	0	1.07517	0	1.07517	0	0	0	1.91567	0	1.91567	0	1.07517	0	1.07517	0	1.07517	0	0	0	1.58124	0	0	0	0	0	0	0	1.58124	1.07517	0
969	TCTACATGTTAATGAG.1_2	shGFPT2	0.424716	0.424716	0	0	0	1.29357	0	0	0	0	0.424716	0	0	0	0	0	0	0.95068	0.424716	0	0	0	0	0	0.95068	0	0.95068	0.721887	0	0	0.424716	0	0.424716	0	0.721887	0	0	0	0.424716	0	0	0	0	0	1.13675	0.424716	0.424716
972	TCTATCAAGTATCTGC.1_2	shGFPT2	0	0	0	1.86956	0	1.86956	0	0	0	0	0	0	0	0	0	0	0	1.86956	1.86956	0	0	0	0	0	0	0	0	0	0	0	1.86956	0	0	0	0	0	0	0	0	0	0	0	1.86956	0	0	0	0
977	TCTCCGATCCCTTCCC.1_2	shGFPT2	0	0	0	1.50876	0	0	0	0	0	0	0	1.50876	0	0	0	0	0	0	2.44784	0	0	0	0	0	0	0	0	0	0	0	0	0	0	0	1.50876	0	2.08471	0	1.50876	0	0	0	0	0	1.50876	0	0
983	TCTTGCGGTATGGAAT.1_2	shGFPT2	0	0.452047	0	0	0	1.48821	0	0	0	0	0.762231	0.762231	0	0	0	0.452047	0	0.452047	0.452047	0	0	0	0	0	0.998637	0	0.452047	0.452047	0.452047	0	1.1897	0	0	0.452047	1.1897	0.452047	0.452047	0	0	0	0	0	0	0.452047	0.452047	0.452047	0
986	TGAATCGGTGGGATTG.1_2	shGFPT2	0	0.553021	0	0	0	1.81962	1.16798	0	0	0.553021	0.553021	0.553021	0	0	0	0	0.553021	0.553021	0.907046	0	0.907046	0	0	0	2.03425	0.907046	1.16798	1.37473	0.907046	0.907046	0	0	0	0.553021	0	0	0.907046	0	0.553021	0	0	0	0	0	0.553021	0.553021	0
988	TGACAGTTCCCGTTGT.1_2	shGFPT2	0	0	0	0	0	0	0	0	0	0	0	0	0	0	0	0	0	0	0	0	0	0	0	0	0	0	0	0	0	0	2.00231	0	0	2.00231	0	0	0	0	0	0	0	0	0	0	2.00231	0	0
989	TGACCCTTCAAGCCTA.1_2	shGFPT2	0	0	0	1.43144	0	0	0	1.43144	0	0	0	0	0	0	0	0	0	0	1.99734	0	0	0	0	0	1.99734	0	0	1.43144	0	0	1.43144	0	0	0	0	1.43144	2.82871	0	2.35652	0	0	0	0	0	1.43144	0	0
991	TGAGACTGTATGAGAT.1_2	shGFPT2	2.38437	0	0	1.4549	0	0	0	0	0	0	0	1.4549	0	0	1.4549	0	0	0	2.02395	0	0	0	0	0	2.02395	0	1.4549	0	0	0	2.02395	0	0	1.4549	0	2.02395	0	0	2.02395	0	0	0	0	2.02395	2.02395	1.4549	0
992	TGAGACTTCCGGTTCT.1_2	shGFPT2	0	0	1.25205	0	1.25205	2.13918	0	0	1.25205	0	0	0	0	0	0	0	1.25205	0	0	0	1.25205	0	0	0	1.25205	0	0	1.79093	1.25205	0	0	0	0	0	0	0	0	0	0	0	0	0	0	0	0	0	0
993	TGAGCGCGTACTGTTG.1_2	shGFPT2	0.655986	0	0	0.655986	0	0.655986	0	0	0	0	0	1.04875	0	0	0	0	0	1.04875	0.655986	0	0	0	0.655986	0.655986	1.33002	0	0.655986	0	0	0	0.655986	0	0	0	0.655986	0	0	0	0.655986	0.655986	0	0	0	0.655986	1.04875	0	0
994	TGAGGGAAGAGTGAAG.1_2	shGFPT2	0	0	0	1.10994	0	1.62301	0	0	1.10994	0	0	1.10994	0	0	0	0	0	0	2.84917	0	1.10994	0	0	0	1.10994	1.10994	0	0	0	0	0	0	0	0	0	1.10994	0	0	0	0	0	0	0	0	0	0	0
997	TGAGTCAGTCGGATTT.1_2	shGFPT2	0	0	0.762628	0	0	2.06222	0	0	1.19022	0	0	0.762628	0	0	0	0	0	0	1.48879	0	0.762628	0	0	0	2.19804	0.762628	1.19022	1.48879	1.48879	1.19022	0	0	0	0.762628	0	1.19022	0.762628	0	0	0	0	0	0	1.19022	1.19022	0	0
998	TGATCAGAGTTGTACC.1_2	shGFPT2	0	0	0	0	0	2.1604	0	0	0	0	0	0	0	0	0	0	0	0	0	0	0	0	0	0	0	0	0	0	0	0	0	0	0	0	0	0	0	0	0	0	0	0	2.1604	0	0	2.1604	0
1007	TGCACGGCAACTCGTA.1_2	shGFPT2	2.45236	0	0	3.10151	0	0	0	0	0	0	0	0	0	0	0	0	0	0	2.45236	0	0	0	0	0	2.45236	0	0	2.45236	0	0	2.45236	0	0	0	0	0	0	0	2.45236	0	0	0	0	0	0	0	0
1008	TGCACGGCACATGTTG.1_2	shGFPT2	0	0	0	0	0	1.37082	0	0	0	0	0	0	0	0	0	0	0	0	0	0	0	0	0	0	0	0	0	1.37082	1.37082	0	1.37082	0	0	0	1.37082	1.37082	0	0	0	0	0	0	0	0	1.37082	0	0
1010	TGCAGGCTCCTGGTCT.1_2	shGFPT2	0	1.28077	1.28077	0	0	0	0	0	0	0	0	1.28077	0	0	0	0	0	0	0	0	1.28077	1.28077	0	0	1.28077	0	1.82436	0	0	0	0	0	1.28077	1.28077	0	1.82436	1.82436	0	0	0	0	0	0	0	2.63885	0	0
1013	TGCGACGGTGATAGTA.1_2	shGFPT2	0	0	1.25116	1.25116	0	1.25116	0	0	0	0	1.78989	1.78989	1.25116	0	1.25116	0	0	0	1.78989	0	0	0	0	0	0	0	1.25116	1.25116	0	1.25116	1.25116	0	1.25116	0	0	1.25116	1.78989	0	2.13808	0	0	0	0	0	2.13808	0	0
1015	TGCGGGTGTGTCCTAA.1_2	shGFPT2	0	0	0	1.16231	0	1.16231	0	0	0	0	0	0	0	0	0	0	0	0	2.02709	0	0	0	0	1.16231	1.16231	0	1.16231	0	0	0	0	0	0	0	0	1.68541	1.16231	0	0	0	0	0	0	0	1.68541	0	0
1018	TGCTCGTCAAGACGAC.1_2	shGFPT2	0	0	0	2.30837	0	1.39111	0	0	0	0	0	0	0	0	0	0	0	0	2.30837	0	0	0	0	1.39111	0	0	0	0	0	0	0	0	0	0	0	0	1.39111	0	0	0	0	0	0	0	0	1.39111	0
1021	TGCTTCGCACTACAGT.1_2	shGFPT2	0	0	0	0	0	0	0	0	0	0	0	0	0	0	2.47001	0	0	0	3.51058	0	0	0	0	0	0	0	3.51058	0	0	0	0	0	0	0	0	0	0	0	0	0	0	0	0	0	0	2.47001	0
1024	TGGATCAGTTGTACGT.1_2	shGFPT2	0	0	0	0	0	1.44989	0	0	1.44989	0	1.44989	0	0	0	0	0	0	0	0	0	0	0	0	0	1.44989	0	0	1.44989	0	0	0	0	0	0	0	0	0	0	0	0	0	0	0	0	0	0	0
1026	TGGGAAGGTACCCGCA.1_2	shGFPT2	0	0	0	2.80651	0	2.80651	0	0	0	0	0	0	0	0	0	0	0	0	2.80651	0	0	0	0	0	3.46899	0	0	0	0	0	0	0	0	0	0	0	0	0	0	0	0	0	0	0	0	0	0
1027	TGGGATTGTCGCGTCA.1_2	shGFPT2	0	0	0	0	0	0.891781	0	0	1.35556	0	0	0	0	0	0	0	0	0	0	0	0.891781	0	0	0	1.35556	1.67117	0	1.35556	1.67117	0	0.891781	0	0	0	0	0	0.891781	0	0	0	0	0	0	0	1.35556	0	0
1028	TGGGCGTGTCCGTACG.1_2	shGFPT2	0	0.57088	0.325636	0.325636	0	2.20642	0.57088	0	1.19679	0	1.65518	0.57088	0	0	0	0.325636	0.325636	1.07314	1.65518	0	0.767667	0	0.325636	0	1.40592	0.57088	0.57088	0	0.57088	0	0	0	0.57088	0.57088	1.07314	0.767667	0	0	0.767667	0	0	0	0.57088	0	1.19679	0.325636	0
1029	TGGGCTGAGTGCAAAT.1_2	shGFPT2	0	0	0.423202	0	0.719636	1.54498	0.719636	0	1.54498	0	0	0.719636	0	0	0	0	0.719636	0	1.74774	0	0.423202	0.423202	0	0.423202	1.13378	0.947994	0.719636	0	0	0	0	0	0.423202	0.719636	0.423202	0	0.719636	0	0	0	0	0	0	0	1.13378	0.423202	0
1032	TGGGTTAAGCATCAAA.1_2	shGFPT2	0	0	1.7052	1.17904	0	1.7052	0	0	0	0	0	1.7052	0	0	0	0	0	0	0	0	0	0	1.17904	0	2.04817	0	1.17904	0	0	0	0	0	0	0	0	0	2.30308	0	0	0	0	0	0	0	2.04817	0	0
1035	TGGTACATCGTTTACT.1_2	shGFPT2	0	0	0	2.37106	0	0	0	0	0	0	0	2.37106	0	0	0	0	0	0	0	0	0	0	0	0	0	0	3.01639	0	0	0	0	0	0	0	0	0	2.37106	0	0	0	0	0	0	0	0	0	0
1039	TGTAACGCATGGCCAC.1_2	shGFPT2	0.970174	0.598398	0	0.970174	0.598398	0.970174	0	0	0.598398	0	0	0.970174	0	0	0	0	0	0.598398	0.598398	0	0	0	0	0.598398	1.77753	1.24058	1.45321	1.77753	0.598398	0	1.24058	0	0	0	1.24058	0.970174	2.12499	0	1.24058	0.598398	0	0	0	0.970174	1.62846	0.970174	0
1041	TGTAAGCCAAGTCCCG.1_2	shGFPT2	0	1.47045	0	0	0	2.40276	0	0	1.47045	0	0	0	0	0	0	0	0	0	1.47045	0	0	0	0	0	0	0	0	0	0	0	0	0	0	0	0	0	0	0	0	0	0	0	0	0	0	1.47045	0
1042	TGTAAGCGTTTGCAGT.1_2	shGFPT2	0	0	0	0	0	0	0	0	0	0	0	0	0	0	0	0	0	0	2.68903	0	0	0	0	0	0	0	0	2.06162	0	0	0	0	0	0	2.06162	0	0	0	0	0	0	0	0	0	0	0	0
1043	TGTACAGCAAATGAAC.1_2	shGFPT2	0	1.3069	0	0	0	0	0	0	0	0	0	2.20652	0	0	0	0	0	0	1.3069	0	0	0	0	0	0	0	1.3069	0	0	0	0	0	0	0	0	1.3069	0	0	0	1.3069	0	0	0	0	1.3069	0	0
1044	TGTACAGCAATAAGGT.1_2	shGFPT2	0	0	0	0	0	1.16686	0	0	0	0	0	0	0	0	1.16686	0	0	0	1.6908	0	0	0	0	0	1.16686	0	1.16686	1.16686	0	0	0	0	0	0	0	0	2.03283	0	0	0	0	0	1.16686	0	1.6908	0	0
1045	TGTACAGTCGTTCCTG.1_2	shGFPT2	0	0	0	0	0	1.6589	0	0	0	0	0	0	0	0	0	0	0	0	2.6218	0	0	0	0	0	1.6589	0	1.6589	0	0	0	1.6589	0	0	0	1.6589	0	3.10313	0	0	0	0	0	0	2.25203	2.25203	0	0
1046	TGTAGACAGAAATTGC.1_2	shGFPT2	0	0	0	0	0	0	0	0	0	0	0	0	0	0	0	0	0	0	3.52753	0	0	0	0	0	3.13664	0	2.48601	0	0	0	0	0	0	0	0	0	0	0	0	0	0	0	0	0	0	0	0
1054	TGTGATGAGCGGTAGT.1_2	shGFPT2	0	0.273777	0.273777	0.273777	0	0.815225	0	0	0.273777	0	0.273777	0.273777	0	0	0	0.488483	0	1.74464	1.42292	0	0.488483	0	0	0	0.945696	0.273777	0.488483	0	0	0	0.66514	0	0.273777	0.273777	0.488483	0.273777	0.945696	0	0	0	0	0	0	0.273777	1.06109	0.273777	0
1055	TGTGCGGCACAGTCCG.1_2	shGFPT2	0	0	0	0	0	0	0	0	0	0	0	1.59113	0	0	0	0	0	0	2.5438	0	0	0	0	0	3.19687	0	0	0	0	0	0	0	0	0	0	0	0	0	1.59113	0	0	0	0	0	1.59113	0	0
1057	TGTGGCGGTCTACTGA.1_2	shGFPT2	0	0	0	0	0	0	0	0	0	0	0	0	0	0	0	0	0	0	2.75266	0	0	0	0	0	2.12132	0	0	2.75266	0	0	0	0	0	0	2.12132	0	0	0	0	0	0	0	0	0	0	0	0
1059	TGTTACTCATCAACCA.1_2	shGFPT2	0	2.31821	0	2.31821	0	0	0	0	0	0	0	0	0	0	0	0	0	0	3.34894	0	0	0	0	0	0	0	2.96088	0	0	0	0	0	0	0	0	0	0	0	0	0	0	0	0	0	0	0	0
1060	TGTTACTGTAATGCGG.1_2	shGFPT2	0	0	0	1.66131	0	1.66131	0	0	0	0	0	1.66131	0	0	0	0	0	0	0	0	0	0	0	0	0	0	1.66131	0	0	0	1.66131	0	0	0	0	0	1.66131	0	0	0	0	0	0	0	0	1.66131	0
1064	TGTTCCGAGCGTGCCT.1_2	shGFPT2	1.98046	0	0	0	0	0	0	0	0	0	0	0	0	0	1.98046	0	0	0	2.60211	0	0	0	0	0	0	0	0	0	0	0	0	0	1.98046	0	0	0	0	0	0	0	0	0	0	1.98046	0	0	0
1065	TGTTCCGAGCTCCATA.1_2	shGFPT2	0	0	2.5598	0	0	0	0	0	0	0	0	0	0	0	0	0	0	0	2.5598	0	0	0	0	0	0	0	0	0	0	0	0	0	0	0	0	0	2.5598	0	0	0	0	0	0	2.5598	2.5598	0	0
1066	TGTTCTAAGTCGCCCA.1_2	shGFPT2	0	0	0	0	0	0	0	0	0	0	0	0	0	2.84229	0	0	0	0	2.84229	0	0	0	0	0	0	0	2.84229	0	0	0	0	0	0	0	0	0	0	0	0	0	0	0	0	0	2.84229	0	0
1067	TGTTCTAGTCCGCAGT.1_2	shGFPT2	0	0	0	0	0	0	0	0	0	0	0	1.24619	0	0	0	0	0	0	3.24924	0	0	0	0	0	1.24619	0	1.24619	0	0	0	0	0	1.24619	0	0	0	2.13195	0	0	0	0	0	0	0	0	0	0
1068	TGTTGAGGTCCGACGT.1_2	shGFPT2	0.665814	0	0.665814	0	0	1.34501	0	0	0.665814	0	1.89859	1.34501	0	0	0	0.665814	0	1.34501	1.74578	0	0	0	0	0	1.34501	0	0.665814	1.062	0	0	0	0	0	0	0.665814	0	1.062	0	0.665814	0	0	0	0	0	1.56534	1.34501	0.665814
1069	TGTTGAGGTCGACTGC.1_2	shGFPT2	1.67176	0	0	0	0	0	0	0	0	0	0	0	0	0	0	0	0	0	2.26624	0	0	0	0	0	0	0	2.26624	1.67176	0	0	0	0	0	1.67176	0	0	1.67176	0	0	0	0	0	0	0	0	0	0
1072	TGTTTGTCACAGTGAG.1_2	shGFPT2	0	0	0	0	0	0	0	0	0	0	0	2.08348	0	0	0	0	0	0	0	0	0	0	0	0	0	0	2.08348	1.50767	0	0	0	0	0	0	0	0	1.50767	0	0	0	0	0	0	1.50767	0	0	0
1073	TGTTTGTCATCGATCA.1_2	shGFPT2	0	0	0	1.3561	0	0	0	0	1.3561	0	0	1.3561	0	0	1.3561	0	0	0	1.3561	0	0	0	0	0	1.3561	0	0	1.3561	1.3561	0	1.3561	0	0	0	0	0	2.26624	0	1.3561	0	0	0	0	0	0	0	0
1074	TGTTTGTGTAGAGATT.1_2	shGFPT2	1.29909	0	0	0	0	1.29909	0	0	0	0	2.19699	1.29909	0	0	0	0	0	0	2.66234	0	0	0	0	1.29909	0	0	1.29909	1.29909	0	0	1.29909	0	0	0	0	2.19699	1.29909	0	0	0	0	0	0	0	0	0	0
1075	TTACAGGTCATCACTT.1_2	shGFPT2	0	1.44047	0	0	0	0	0	0	0	0	0	0	0	0	0	0	0	0	2.00759	0	0	0	0	0	1.44047	0	2.00759	0	0	0	0	0	0	0	0	0	2.83986	0	0	0	0	0	0	2.00759	1.44047	0	0
1081	TTACCGCGTATCGCAT.1_2	shGFPT2	0	0	0	0	0	0	0	0	0	0	0	0	0	0	0	0	0	0	0	0	0	0	0	0	0	0	0	0	0	0	0	0	1.71746	0	0	0	0	0	0	0	0	0	0	0	1.71746	1.71746	0
1082	TTACTGTAGATTCGCT.1_2	shGFPT2	0	0	0	0	0	1.79972	0	0	0	0	0	1.79972	0	0	0	0	0	0	0	0	0	1.79972	0	0	0	0	2.40658	2.40658	0	0	1.79972	0	0	0	0	0	1.79972	0	0	0	0	0	0	0	2.40658	0	0
1084	TTAGGCACACCCTGAG.1_2	shGFPT2	0	0	0	0	0	1.16686	0	0	0	0	0	1.16686	0	0	0	0	0	0	2.28723	0	0	0	0	0	1.16686	0	1.16686	0	0	0	2.03283	0	1.6908	0	0	2.03283	2.28723	0	1.16686	0	0	0	0	0	2.03283	0	0
1085	TTAGGCAGTTGCAACT.1_2	shGFPT2	1.10384	1.10384	0	1.61571	0	1.10384	0	0	0	0	0	0	0	0	1.10384	0	0	0	1.61571	0	0	0	0	0	3.61854	0	1.10384	0	0	0	1.61571	0	0	1.10384	0	1.10384	0	0	1.61571	1.10384	0	0	0	1.10384	1.10384	0	0
1087	TTAGGGTCATCTCCCA.1_2	shGFPT2	2.78486	0	2.78486	2.78486	0	0	0	0	0	0	0	0	0	0	0	0	0	0	2.78486	0	0	0	0	0	0	0	2.78486	0	0	0	0	0	0	2.78486	0	0	0	0	0	0	0	0	0	0	2.78486	0	0
1088	TTAGTCTGTACCTGTA.1_2	shGFPT2	1.26504	0	1.26504	1.26504	0	0	0	0	0	0	2.934	1.26504	0	0	0	1.26504	0	0	0	0	0	0	0	0	0	0	1.26504	0	1.26504	0	0	0	0	0	0	0	2.41349	1.80607	1.26504	0	0	0	0	0	1.26504	1.26504	0
1089	TTATTGCAGTGGTTGG.1_2	shGFPT2	0	0	0	2.37018	0	0	0	0	0	0	0	0	0	0	1.76638	0	0	0	3.01547	0	0	0	0	0	0	0	0	0	0	0	1.76638	0	1.76638	0	0	0	0	0	0	0	0	0	0	0	1.76638	0	0
1090	TTCAATCCAGGTCAGA.1_2	shGFPT2	0	0	0	0	0	0	0	0	1.61361	0	0	0	0	0	0	0	0	0	0	0	0	0	0	0	1.61361	0	2.56976	1.61361	0	0	0	0	0	0	0	0	2.83812	0	0	0	0	0	0	0	2.20186	1.61361	0
1094	TTCACGCCAATTTCGG.1_2	shGFPT2	0	0.816315	0	1.25968	0	1.25968	0	0	0.816315	0	0	0.816315	0	0	0	0	0	0	1.56579	0	0	0	0.816315	0	2.78166	0	1.56579	2.40669	1.56579	1.25968	1.25968	0	0.816315	0.816315	1.25968	1.56579	1.25968	0	1.25968	0	0	0	0	0	0.816315	0	0.816315
1097	TTCAGGACACTTGAAC.1_2	shGFPT2	0	0	0	0	0	1.53593	0	0	0	0	0	0	0	0	2.11521	0	0	0	0	0	0	0	0	0	1.53593	0	0	0	0	0	1.53593	0	0	0	0	0	3.27788	0	0	0	0	0	0	0	1.53593	0	0
1099	TTCCAATTCTCTCAAT.1_2	shGFPT2	0	0	0	0.911963	0	2.13369	0	0	0.911963	0	0	0	1.38088	0	0	0	0	0	1.69884	0	0	0	0	0	1.93972	0.911963	1.38088	1.38088	0	0.911963	0	0	0	0	0.911963	0	2.13369	0	0.911963	0	0	0	0	0	0.911963	0	0
1101	TTCCTAAAGCCTCCAG.1_2	shGFPT2	0	2.3837	0	0	0	1.77875	1.77875	0	1.77875	0	0	1.77875	0	0	0	0	0	0	0	0	0	0	0	1.24163	0	0	1.77875	2.12629	0	1.24163	1.24163	0	0	0	0	0	0	0	1.24163	0	0	0	0	1.77875	0	0	0
1106	TTCGGTCCAACGAGGT.1_2	shGFPT2	1.37666	0	0	0	0	0	0	0	0.90859	0	0	0	0	0	0	0	0	0	1.69423	0	0	0	0.90859	0	0	0	0	0	0	0	0.90859	0	0	0	0	1.37666	0	0	0	0	0	0	0.90859	0	1.93489	0	0
1109	TTCTCTCTCATCGCTC.1_2	shGFPT2	0	0	0	0	0	0	0	0	0	0	0	0	0	0	0	0	0	0	0	0	0	0	0	0	1.23002	1.23002	0	0	0	0	0	0	0	0	0	0	1.76518	0	0	0	0	0	0	0	1.76518	0	0
1110	TTCTCTCTCGTCCATC.1_2	shGFPT2	0	0	0	1.4192	0	1.4192	0	0	0	0	0	0	0	0	0	0	0	1.4192	0	0	0	0	1.4192	0	0	0	1.4192	1.4192	0	0	0	0	0	0	1.4192	0	1.4192	0	1.4192	0	0	0	0	0	2.34194	0	0
1114	TTGAACGCATCTCATT.1_2	shGFPT2	0	1.65478	0	1.65478	0	0	0	0	0	0	0	0	0	0	0	0	0	0	3.09827	0	0	0	1.65478	0	2.24748	0	2.24748	0	0	0	0	0	0	0	1.65478	1.65478	2.24748	0	0	0	0	0	0	0	0	1.65478	0
1116	TTGAGTGCAATGGCAG.1_2	shGFPT2	0.7704	0	1.50005	0.7704	0	2.0749	0	0	0.7704	0	0	0	0	0	0	0	0	0	1.73033	0	1.20035	0	0	0	0.7704	1.50005	1.50005	0	1.50005	1.20035	0	0	0.7704	0	0.7704	0	1.20035	0	0	0	0	0	0	0	1.20035	0.7704	0
1117	TTGAGTGGTGTTGCCG.1_2	shGFPT2	2.13173	0	0	0	0	0	0	0	0	0	0	0	0	0	0	0	0	0	0	0	0	0	0	0	0	0	2.76373	2.13173	0	0	0	0	0	0	0	0	0	0	0	0	0	0	0	0	0	2.13173	0
1121	TTGCCTGCATCCTATT.1_2	shGFPT2	1.41707	0	0	0	0	1.41707	0	0	1.41707	0	0	1.41707	1.41707	0	1.41707	0	0	0	1.981	0	0	0	0	0	0	0	1.981	1.41707	0	0	1.41707	0	0	0	1.41707	0	1.41707	0	2.3394	0	0	0	0	0	1.981	0	0
1123	TTGCTGCCACTCTAGA.1_2	shGFPT2	0	0	0	2.08409	0	2.08409	0	0	0	0	0	0	0	0	0	0	0	0	0	0	0	0	0	0	3.37243	0	2.08409	0	0	0	0	0	0	0	0	2.08409	0	0	0	0	0	0	0	0	0	0	0
1124	TTGCTGCTCGTAGCCG.1_2	shGFPT2	0	0	0	0	0	1.29426	0	0	0	0	0	1.29426	0	0	0	0	0	0	2.19109	0	0	0	1.29426	0	1.29426	0	1.29426	1.29426	0	0	1.29426	0	1.29426	0	0	0	2.45042	0	0	0	0	0	1.29426	0	1.84001	0	0
1126	TTGGATGAGTGGCCTC.1_2	shGFPT2	0	0	0	2.32776	0	0	0	0	1.72766	0	0	0	0	0	0	0	0	0	2.97092	0	0	0	0	0	0	0	0	0	0	0	0	0	0	0	0	0	2.32776	0	1.72766	0	0	0	0	0	0	0	0
1128	TTGGGATCAATGCAAA.1_2	shGFPT2	0	0	0	0	0	0	0	0	1.06002	0	0	0	0	0	0	0	0	0	1.56295	0	0	0	0	0	0	0	0	0	0	0	1.56295	0	0	0	0	1.06002	0	0	0	0	0	0	0	0	1.06002	0	0
1129	TTGGGTAAGGATCATA.1_2	shGFPT2	0	0	0	0	0	1.68917	0	1.68917	0	0	0	0	0	0	0	0	0	0	2.28544	0	0	0	0	0	0	0	1.68917	0	0	0	0	0	0	1.68917	0	0	1.68917	0	1.68917	0	0	0	0	0	2.28544	1.68917	0
1130	TTGTGGACATTGGCAT.1_2	shGFPT2	1.37511	0	0	0	0	0.907355	0	0	0	0	0	1.37511	0	0	0	0	0	0	2.66025	0	0.907355	0	0.907355	0	1.93312	0	0	0.907355	0	0	0	0	0	0	0	0	1.93312	0	0	0	0	0	0	0.907355	0.907355	0	0
1133	TTGTTGTCACGGCCAT.1_2	shGFPT2	0	0	0	0	0	2.32662	0	0.767977	0	0.767977	0	0	0	0	0	0	0	0	1.19719	0	0.767977	0	0	0	0.767977	0	0.767977	0	0.767977	0	0.767977	0	1.49654	0	0	0.767977	0.767977	0	0	0	0	0	0	0	1.72662	0.767977	0
1137	TTTACGTGTCGCTTGG.1_2	shGFPT2	0	0	0	0	0	0	0	0	0	0	0	0	0	0	0	0	0	0	2.47348	0	0	0	0	0	2.47348	0	1.86126	0	0	0	0	0	0	0	0	0	0	0	1.86126	0	0	0	0	0	1.86126	0	0
1141	TTTATGCTCTAGACCA.1_2	shGFPT2	0	0.783343	0.466491	0	0	1.64108	0	0	1.02359	0	1.51871	0.783343	0	0	0	0.466491	0	0.466491	1.21715	0	0	0	0	0	0	0	1.21715	0.783343	0	0	1.02359	0	0.783343	0.466491	0.466491	0.466491	0.783343	0	0.783343	0	0	0	0	0	1.64108	0.466491	0
1142	TTTCACAAGTGATTCC.1_2	shGFPT2	0	0	0	0	0	0	0	0	1.81894	0	0	0	0	0	0	0	0	0	0	0	0	0	0	0	0	0	0	0	0	0	0	0	0	0	0	0	0	0	0	0	0	0	0	0	1.81894	0	0
1145	TTTCGATGTATCGTTG.1_2	shGFPT2	0	0	0	0	0	0	0	0	0	0	0	0	0	0	0	0	0	0	3.00995	0	0	0	0	0	0	0	2.36492	0	0	0	0	0	0	0	0	2.36492	3.00995	0	0	0	0	0	0	0	0	0	0
1149	TTTGGAGAGTGTTGTC.1_2	shGFPT2	0	0	1.62826	0	0	0	0	0	1.62826	0	0	0	0	0	0	1.62826	0	0	0	0	0	0	0	0	1.62826	0	0	0	0	0	1.62826	0	2.21812	0	0	0	1.62826	0	0	0	0	0	1.62826	0	1.62826	0	0
1151	TTTGGAGTCTCTCGAC.1_2	shGFPT2	1.91255	1.91255	0	1.91255	0	0	0	0	0	0	0	0	0	0	2.9075	0	0	0	0	0	0	0	0	0	1.91255	0	2.52898	1.91255	0	0	0	0	0	0	0	0	0	0	1.91255	0	0	0	0	0	1.91255	0	0
1153	TTTGGTTTCTTCCTAA.1_2	shGFPT2	0	1.22882	0	0	0	0	0	0	0	0	0	0	0	0	0	0	0	0	2.36733	0	1.76378	0	0	0	0	0	1.76378	2.36733	0	0	1.22882	0	0	0	0	0	0	0	1.76378	0	0	0	0	0	1.76378	1.76378	0
[truncated: 15 more columns]

## Sheet: Table S7C
	Single Cell Name	Group	Tim3 (Havcr2)	PD1 (Pdcd1)	LAG3 (Lag3)	TIGIT (Vstm3)	CD226 (Cd226)	Aebp2	Atf6	Bach1	Bcl11b	Cebpa	Cebpb	Ciita	Creb3l1	Creg1	Dach1	Ebf1	Elk3	Eomes	Eya1	Gata3	Hic1	Hlx	Hmgn3	Id2	Insm1	Irf5	Kcnip3	Klf10	Klf12	Klf6	Maf	Mbd2	Mef2a	Mef2c	Mitf	Mllt3	Mycn	Nab1	Ncoa7	Nfe2l1	Nfkb1	Nr4a2	Pax5	Phf21a	Pias3	Pou2af1	Pparg
6	AAAGAACGTTGTATGC.1_1	shNC	0	0	0	1	0	0	0	0	-0.200765	0	0	0	0	0	0	0	0	0	0	0	0	0	0	0.369495	0	0	0	0	0	0.178973	0	0	0.013143	0	0	0	0	0	0	0	0	0	0	0	0	0	0
10	AAAGTCCAGTGCACTT.1_1	shNC	1	0	0	1	0	0	0	0	0	0.0145478	-0.0482775	0	0	0.250369	0	0	0.00698249	0	0	-0.0570208	0	0	0	0.128117	0	0	0	0	0	0.127643	0	0.00399162	0.00650442	0.0134898	0	-0.0805177	0	0	0.0101714	0	-0.00147882	0	0	0	0	0	0
11	AAATGGACAAGAAATC.1_1	shNC	1	1	0	1	1	0.0106707	0.033717	0.0120017	0	0.00443693	-0.0147435	0	0	0	0	-0.00576544	0.00470602	0	0	0	-0.000414232	0	-0.000764621	0.161302	0	0	0	0.00203512	0	0.0622786	-0.00195812	0.00338472	0.00198378	0	0	-0.0245571	0	0.0485165	0.00536705	-7.33377e-06	-0.000780316	0.000919885	0	0.00924298	0	0	0
12	AACAAGATCACGGGCT.1_1	shNC	0	0	0	1	0	0	0	0	-0.197266	0	0	0	0	0	0	0	0.00718077	0	0	-0.05864	0	0	0	0.189872	0	0	0	0	0	0.131267	0	0	0	0	0	0	0	0.235754	0	0	0	0	0	0	0	0	0
15	AACACACGTTGTTGTG.1_1	shNC	1	0	1	1	0	0	0	0	0	0	-0.0364482	0	0	0	0	0	0.00632041	0.040429	0	0	0	0	0	0.202657	0	0	0.0289539	0.00590787	0	0.11554	0	0.00520689	0	0	0.00378955	0	0	0.140842	0	0	-0.00130931	0.00311961	0	0.00697235	0	0	0
16	AACACACTCACGAGGA.1_1	shNC	0	1	1	1	0	0.0122726	0.0670909	0	-0.0602979	0	-0.016957	0	0	0	0	0	0	0.0277119	0	-0.0377473	0	0	-0.000547234	0.153505	0	0	0	0	0	0.136427	0	0.00553514	0	0	0	-0.111653	0	0	0	0	-0.00177188	0.00291114	0	0	0	0	0
17	AACAGGGGTGACACAG.1_1	shNC	0	0	0	1	0	0	0	0	0	0	0	0	0	0	0	0	0	0	0	0	0	0	0	0.25241	0	0	0	0.00800145	0	0	0	0	0.00779961	0	0	0	0	0.190752	0.0121968	0	0	0	0	0	0	0	0
18	AACAGGGTCCGACATA.1_1	shNC	0	0	0	1	0	0	0	0	0	0	0	0	0	0	0	0	0	0	0	0	0	0	0	0.232783	0	0	0	0.0121241	0	0.160934	0	0	0	0	0	0	0	0	0	0	0	0	0	0.0143086	0	0	0
22	AACCTGATCTCATTAC.1_1	shNC	0	1	0	1	1	0	0	0	-0.0966947	0	-0.0393824	0	0	0	0	0	0	0	0	0	0	0	-0.000877553	0.124683	0	0	0	0.0064939	0	0.0861991	0	0.00388464	0	0	0	0	0	0	0	0	-0.00143919	0	0	0	0	0	0
23	AACCTTTGTGATAGTA.1_1	shNC	0	1	1	1	0	0	0	0	-0.0984256	0	-0.0276792	0	0	0	0	0	0.00692895	0.0452348	0	0	0	0	0	0.219857	0	0	0	0	0	0.126664	0	0	0.00930164	0	0	0	0	0	0	0	0	0.00172697	0	0	0	0	0
26	AACGTCATCTTTCAGT.1_1	shNC	0	0	0	1	0	0	0	0	0	0	0	0	0	0	0	0	0	0	0	0	0	0	0	0	0	0	0	0	0	0.161974	0	0	0.0118947	0.0246688	0	0	0	0	0	-3.22144e-05	-0.00198118	0	0	0	0	0	0
27	AACTTCTCAGCCATTA.1_1	shNC	0	1	1	1	0	0	0	0	-0.197222	0	-0.0253382	0	0	0.147996	0	0	0	0	0	-0.0358812	0	0	0	0.232951	0	0	0	0	0	0.16105	0	0	0	0	0	-0.0730162	0	0.144255	0	0	0	0.00464994	0	0	0	0	0
28	AAGAACAAGAGTTCGG.1_1	shNC	0	0	0	1	0	0	0	0	0	0	0	0	0	0	0	-0.00820299	0	0	0	0	-0.000849269	0	-0.000902088	0.128169	0	0	0	0	0	0	0	0.00399324	0.00650706	0	0	0	0	0	0	0	0	0	0	0	0	0	0
29	AAGAACAGTACGTACT.1_1	shNC	1	0	0	1	0	0	0	0.0439627	0	0	-0.0583703	0.038872	0	0	0	0	0	0	0	0	0	0	0	0	0	0	0	0	0	0.185032	0	0	0	0	0	0	0	0	0	0	0	0	0	0	0	0	0
30	AAGACTCTCCGTCCTA.1_1	shNC	0	1	1	1	1	0	0	0	-0.121582	0	0	0	0	0.136133	0	-0.0100338	0.00592905	0	0	-0.0484181	0	0	0	0.217639	0	0	0	0.00816532	0	0	0	0.00488448	0.0130039	0	0	-0.0985281	0	0	0	0	-0.00295652	0	0	0	0	0	0
32	AAGATAGCATGCGGTC.1_1	shNC	1	1	0	1	1	0	0	0	-0.12421	0	-0.0234897	0	0	0	0	0	0.00407329	0.038388	0	0	0	0	0	0.310782	0	0	0	0.00560962	0	0.134923	0	0.00499005	0.00546812	0	0	0	0	0.133731	0.00855088	-2.02149e-05	-0.00184872	0.0026556	0	0	0.0284625	0	0
33	AAGATAGGTACGGCAA.1_1	shNC	1	1	0	1	0	0	0	0	0	0	-0.0197623	0	0	0	0	0	0	0	0	0	0	0	0	0.0906141	0	0	0.0231297	0	0	0.118883	0	0.00282319	0	0	0	-0.0872736	0	0.112511	0.00719402	0	-0.00104594	0.00123302	0	0.0105699	0.0239461	0	0
34	AAGCATCGTGATGAAT.1_1	shNC	0	0	1	1	1	0	0	0	0	0	-0.0505421	0	0	0	0	0	0	0	0	0	0	0	0	0.194428	0	0	0	0	0	0.134417	0	0.0042528	0.00693001	0	0	0	0	0.169484	0	0	0	0	0	0	0	0	0
35	AAGCCATAGGATTCCT.1_1	shNC	0	0	0	1	1	0	0	0.0125702	0	0	-0.0509598	0	0	0.0355369	0	-0.00450708	0	0	0	-0.0347309	0	0.0261159	-0.0010031	0.0704215	0	0	0	0	0	0.107072	0	0	0	0	0	-0.0257204	0	0.0874387	0.00324913	-1.32172e-05	-0.00107923	0.00095825	0	0.00432865	0	0	0
36	AAGCCATCAGTTCCAA.1_1	shNC	0	0	0	1	0	0.0429727	0.178065	0	0	0	0	0	0	0	0	0	0	0	0	0	0	0	0	0	0	0	0	0	0	0	0	0	0	0	0	-0.12969	0	0	0	0	0	0	0	0	0	0	0
40	AAGGAATGTCGGATTT.1_1	shNC	0	1	0	1	1	0.0196241	0.107279	0.0381864	0	0	0	0	0	0	0	0	0.00470184	0	0	-0.0383964	0	0	0	0	0	0	0	0	0	0.149745	0	0.00561285	0.0063119	0	0	0	0	0	0	0	-0.00143505	0	0	0	0	0	0
41	AAGGAATGTTACGATC.1_1	shNC	0	0	0	1	0	0	0	0	-0.170869	0	0	0	0	0	0	0	0	0.0380949	0	-0.0491539	0	0	0	0.258943	0	0	0	0.00556679	0	0.166874	0	0.00333005	0.00985294	0	0	0	0	0	0	0	-0.00123372	0.00264081	0	0	0	0	0
44	AAGGTAAGTAGTCGGA.1_1	shNC	0	0	1	1	1	0	0	0	0	0	0	0	0	0	0	0	0	0	0	0	0	0	0	0.265665	0	0	0.0420913	0	0	0.183667	0	0	0	0	0	0	0	0	0	0	-0.00261761	0	0	0.010136	0	0	0
46	AAGTACCGTCGAGTTT.1_1	shNC	0	0	0	1	0	0	0	0	0	0	0	0	0	0	0	0	0	0	0	0	0	0	0	0.213307	0	0	0	0	0	0	0	0	0	0	0	0	0	0	0	0	0	0	0	0	0	0	0
49	AAGTTCGTCCGTAGGC.1_1	shNC	0	0	1	1	0	0	0	0	0	0	-0.0296739	0	0	0.118147	0	0	0	0	0	0	0	0	0	0.193918	0	0.087464	0	0	0	0	-0.00443066	0.00275464	0.0108741	0.00930937	0.00295377	0	0	0	0.00701936	0	0	0.00263871	0	0	0	0	0
50	AATAGAGTCCCGATCT.1_1	shNC	1	1	0	1	0	0.00973587	0.111214	0	-0.0478343	0	-0.0404634	0	0	0.0535589	0	0	0	0	0	0	0	0	0	0.169777	0.000202589	0	0	0	0	0.137755	-0.00503607	0.00192171	0.00654344	0.0159288	0.00206062	0	0	0.124779	0.00489688	-1.15765e-05	-0.00115999	0.00136747	0	0.00379132	0	0	0
54	AATGAAGTCCGCCTAT.1_1	shNC	0	0	1	1	0	0	0	0	0	0	0	0	0	0	0	0	0	0	0	0	0	0	0	0.228422	0	0	0	0	0	0	0	0	0.00679294	0	0	0	0	0	0	-2.51125e-05	0	0.0026029	0	0	0	0	0
59	AATTCCTAGTAGCATA.1_1	shNC	0	1	1	1	1	0	0	0	0	0	-0.0334025	0	0	0.132992	0	0	0	0	0	0	0	0	0	0.213544	0	0	0	0	0	0	0	0	0	0	0	0	0	0	0	-2.87457e-05	0	0.00380965	0	0.0094142	0	0	0
60	AATTCCTCAGAGGCTA.1_1	shNC	1	1	0	1	0	0.00788495	0.0944812	0.0153433	-0.0387403	0	-0.0451581	0.0135666	0	0.113023	0	0	0.0018892	0	0	0	0	0	-0.000351588	0.147464	0	0.0703857	0.0213978	0	0	0.101949	-0.00250331	0.00341139	0	0.00525976	0.00492652	-0.0313945	0	0	0.00396592	-9.37569e-06	-0.000576605	0.00148992	0	0	0	0	0
61	AATTTCCTCTACTGCC.1_1	shNC	0	0	0	1	0	0	0	0	-0.225176	0	0	0	0	0	0	0	0	0	0	0	0	0	0	0.290353	0	0.0923542	0	0	0	0.0993245	-0.00719958	0.00447614	0	0	0	0	0	0	0	0	-0.00165833	0	0	0.00883095	0	0	0
64	ACAAGCTCAAGGGCAT.1_1	shNC	0	1	0	1	0	0	0.0395438	0	-0.0793452	0	-0.0409969	0	0	0	0	-0.00497732	0.00462324	0	0	0	-0.000210728	0	-0.000547359	0.102311	0	0	0	0.00532872	0	0.0537653	0	0.00242298	0.00232661	0.00818849	0	-0.0288009	0	0.0965615	0.00363828	-2.29441e-05	0	0.00139219	0	0.00478027	0	0	0
65	ACACAGTCATCGCTAA.1_1	shNC	0	0	0	1	1	0.00929655	0	0	-0.0749219	0.00668777	-0.0494034	0	0	0.0838883	0	0	0.00222741	0	0	-0.0298364	0	0.0375841	-0.000414531	0.124406	0	0	0	0	0	0.142334	-0.00484128	0.00300993	0.00299015	0.0101721	0.00489206	-0.0370149	0	0	0	0	-0.000679831	0.00199255	0	0.00362024	0	0	0
67	ACACGCGCATGGACAG.1_1	shNC	0	0	0	1	0	0.0152691	0	0	0	0	0	0	0	0	0	-0.00619117	0	0	0	0	0	0	-0.000680847	0	0	0	0	0	0	0.0668773	0	0.00301388	0	0	0	0	0	0	0	0	0	0	0	0	0	0	0
69	ACACTGACAGTAACAA.1_1	shNC	0	0	1	1	0	0	0	0	-0.258605	0	-0.0576112	0	0	0	0	0	0	0	0	-0.0815829	0	0	0	0	0	0	0	0	0	0	0	0	0	0	0	-0.209569	0	0	0	0	0	0	0	0.0162372	0	0	0
70	ACACTGAGTGCAAGAC.1_1	shNC	0	0	0	1	0	0	0	0	0	0	0	0	0	0	0	0	0	0	0	0	0	0	0	0.359293	0	0	0	0	0	0	0	0	0	0	0	0	0	0	0	0	0	0.00393291	0	0	0	0	0
71	ACAGAAAAGAGTCAAT.1_1	shNC	0	0	0	1	0	0	0	0	0	0	0	0	0	0	0	0	0	0	0	0	0	0	-0.00103641	0.294859	0	0	0	0	0	0	0	0	0	0	0	0	0	0	0	0	0	0	0	0	0	0	0
72	ACAGAAACAACTACGT.1_1	shNC	0	0	0	1	0	0	0	0	0	0	-0.0427102	0	0	0	0	-0.0125337	0	0	0	0	0	0	0	0.260859	0	0	0	0	0	0.277533	0	0.00812737	0.00994243	0	0	0	0	0	0	0	0	0	0	0	0	0	0
73	ACAGAAAGTACCTGTA.1_1	shNC	0	0	0	1	0	0	0.0748922	0	0	0.00985531	-0.0461667	0.0235713	0	0.116341	0	0	0.00328239	0.0477536	0	0	0	0	0	0.133982	0	0.0557924	0	0	0	0.132392	0	0	0.0116083	0	0.00447611	-0.0842037	0	0	0	-1.62898e-05	-0.00100182	0	0	0.0102389	0	0	0
76	ACAGGGACACCAAATC.1_1	shNC	0	0	0	1	1	0	0	0	-0.176655	0	0	0	0	0	0	0	0	0	0	0	0	0	0	0	0	0	0	0	0	0	0	0	0	0	0	0	0	0	0	0	-0.0026293	0	0	0	0	0	0
77	ACAGGGATCACCCTTG.1_1	shNC	1	0	1	1	0	0.0107263	0.0941558	0	-0.0527002	0.00771627	-0.0302571	0.0296343	0	0.0947497	-0.00392828	0	0	0	0	0	0	0	0	0.197019	0	0	0	0.00353928	0	0.154444	0	0.00211719	0.00345	0.0146078	0.00227024	0	0	0	0	0	-0.00160139	0.00268091	0	0.0085277	0	0	0
78	ACATCGACATGGGTTT.1_1	shNC	0	0	0	1	0	0	0.0835368	0.0450545	0	0	-0.0494685	0	0	0.0840637	0	0	0	0	0	0	0	0	0	0.09681	0	0	0	0	0	0.156813	-0.00735077	0.00457014	0.004915	0.0101934	0	-0.0608424	0	0	0	0	-0.00111746	0	0	0	0	0	-0.00795848
79	ACATTTCGTGCAATAA.1_1	shNC	0	0	0	1	1	0	0	0	0	0	0	0	0	0	0	0	0	0	0	0	0	0	0	0.327016	0	0	0	0	0	0.0821936	0	0	0	0	0	0	0	0.147618	0.013789	0	0	0	0	0	0	0	0
82	ACCACAACAGCACAAG.1_1	shNC	0	1	0	1	1	0.0225855	0	0	-0.185951	0	-0.020489	0	0	0	0	0	0	0	0	-0.0441907	0	0	0	0.267584	0	0	0	0	0	0.0989222	0	0.00629477	0	0	0	-0.110981	0	0	0	-1.76326e-05	0	0.00127836	0	0.00879517	0.0248266	0	0
83	ACCACAAGTGCCCACA.1_1	shNC	1	0	0	1	0	0	0.0686178	0.0244248	0	0	-0.0455524	0.0127677	0	0.211872	0	0	0	0.0283426	0	0	0	0	0	0.104395	0	0.0671084	0	0	0	0.0978183	0	0.00146471	0.00915968	0	0.00265665	0	0	0	0	-8.82358e-06	-0.000917888	0	0	0.00488794	0.0124236	0	-0.00386473
85	ACCATTTGTTGTGGCC.1_1	shNC	0	0	0	1	0	0.0347928	0	0	-0.170944	0	0	0	0	0	0	0	0.00602239	0	0	0	0	0	0	0.159242	0	0	0	0	0	0	0	0.00496138	0	0	0	0	0	0.197723	0	0	0	0	0	0	0	0	0
86	ACCCTCACATGACGGA.1_1	shNC	0	1	1	1	0	0.0221386	0	0	-0.0711217	0	-0.0200008	0	0	0	0	-0.00897655	0	0.0326864	0	0	0	0	0	0.0917078	0	0	0	0	0	0	0	0.0054051	0	0	0	-0.0576358	0	0	0	-1.72124e-05	0	0.0012479	0	0.00563707	0	0	0
88	ACCCTTGCAATACGAA.1_1	shNC	0	0	0	1	0	0.0327533	0.179053	0	-0.243454	0	0	0	0	0	0	0	0	0	0	0	0	0	0	0.207502	0	0	0	0	0	0.217029	0	0	0	0	0	0	0	0	0.016474	0	-0.00239516	0	0	0	0	0	0
89	ACCCTTGCAGCACACC.1_1	shNC	0	0	1	1	1	0	0	0	-0.150496	0	0	0	0	0	0	0	0.0051502	0	0	-0.0599325	0	0	0	0.194057	0	0	0	0	0	0	0	0.00424285	0.0069138	0	0	0	0	0	0	0	0	0	0	0	0	0	0
90	ACCGTTCCAGCCTTCT.1_1	shNC	0	1	1	1	1	0	0.17018	0	0	0	0	0	0	0	0	0	0	0	0	0	0	0	0	0	0	0	0	0	0	0.136347	0	0.0061446	0.0100127	0	0	0	0	0	0	0	0	0.00268364	0	0	0	0	0
95	ACGATCACAGTGTGCC.1_1	shNC	1	0	1	1	0	0.0100806	0	0	0	0	-0.0359355	0	0	0	0	-0.0054737	0.00449694	0	0	0	0	0	-0.000931526	0.118907	0	0.0235573	0	0	0	0.0253353	0	0.00114176	0.00186051	0.00385859	0.00122429	-0.0230312	0	0.0455018	0.00290942	-1.60519e-05	-0.000987193	0.000869016	0	0.00392556	0	0	0
98	ACGGGTCTCTGCAGCG.1_1	shNC	1	1	1	1	1	0	0.039705	0	-0.0356849	0	-0.0170212	0	0	0.0399555	0	-0.00784728	0	0	0	0	-0.000211587	0	-0.000722419	0.139422	0	0	0	0	0	0.0318115	0	0	0.0023361	0	0	0	0	0	0	-1.92645e-05	-0.000531128	0	0	0	0	0	0
100	ACGGTTACACGTAGTT.1_1	shNC	0	0	0	1	1	0.0375941	0	0	-0.215214	0	0	0	0	0	0	0	0	0.0624229	0	0	0	0	0	0.328741	0	0	0	0	0	0.164658	0	0	0	0	0	0	0	0	0	0	0	0.00324087	0	0.0107654	0	0	0
102	ACGTAACAGGCATGCA.1_1	shNC	0	1	0	1	1	0	0	0	-0.114347	0	0	0	0	0	0	-0.00943666	0	0	0	0	0	0	0	0.147444	0	0	0	0	0	0.101935	0	0	0	0	0	-0.130117	0	0	0	0	0	0.00510831	0	0	0	0	-0.012121
103	ACGTAACGTCTCCCTA.1_1	shNC	0	0	0	1	0	0	0	0	-0.183729	0	0	0	0.019415	0	0	0	0	0	0	0	0	0	0	0	0	0	0	0	0	0	0	0	0	0	0	0	0	0.216047	0	0	0	0.00236768	0	0	0	0	0
104	ACGTACATCGCTAAAC.1_1	shNC	1	0	0	1	0	0	0	0	0	0	-0.04279	0.0163231	0.00670636	0.190302	0	0	0	0	0	-0.0185623	0	0	0	0.126357	0	0.081226	0	0.00313039	0	0.0679584	-0.00744403	0.0030626	0	0.00632846	0	-0.0377733	0	0	0.0078041	-1.12807e-05	-0.00113464	0	0	0.00369442	0	0	0
106	ACGTTCCCACGGTCTG.1_1	shNC	0	1	0	1	1	0	0	0	0	0	-0.0427619	0	0	0.0941247	0	0	0	0	0	-0.0497257	0	0	0	0	0	0	0	0	0	0.0749397	0	0.00610884	0.00550324	0	0	-0.0681242	0	0	0	0	0	0.00331354	0	0	0	0	0
107	ACTATCTAGATGTAGT.1_1	shNC	0	0	0	1	0	0	0	0	0	0	0	0	0	0	0	0	0	0	0	0	0	0	0	0	0	0	0	0	0	0.173839	0	0	0	0	0	0	0	0	0	0	-0.00290243	0	0	0.015456	0	0	0
110	ACTATTCCAACGTATC.1_1	shNC	0	0	1	1	1	0	0	0	-0.205722	0	0	0	0	0	0	0	0	0	0	0	0	0	0	0.226393	0	0	0	0	0	0.203042	0	0.00512701	0	0	0	0	0	0	0	0	-0.00189946	0.00399635	0	0	0	0	0
116	ACTGATGCATCGTGCG.1_1	shNC	0	0	0	1	0	0.0286443	0	0	-0.140735	0	0	0	0	0	0	0	0	0	0	0	0	0	0	0.181471	0	0	0	0	0	0	-0.00909397	0	0	0	0	-0.154075	0	0.225323	0	0	0	0	0	0.0150693	0	0	0
117	ACTGCAAGTACCAGAG.1_1	shNC	1	1	1	1	1	0.00858895	0.0469533	0	0	0	-0.0255245	0	0	0.0783758	0	0	0.00442615	0	0	-0.0168051	0	0	0	0.171462	0	0	0	0	0	0.11854	-0.00272681	0.0057576	0.00702729	0	0	-0.0735532	0	0	0	-1.02128e-05	0	0	0	0.00334469	0	0	0
118	ACTGTCCCACAAGGTG.1_1	shNC	0	1	1	1	0	0	0.118357	0	0	0	-0.0299144	0	0	0	0	0	0.00518739	0	0	0	0	0	0	0.137163	0	0	0	0	0	0.0948276	0	0.00608163	0.00991012	0	0	0	0	0	0	0	0	0.00186643	0	0	0	0	0
119	ACTGTGACATTAAAGG.1_1	shNC	0	0	0	1	0	0	0	0	-0.126599	0	-0.0490534	0	0	0	0	0	0	0	0	0	0	0	0	0	0	0	0	0	0	0.112858	-0.0112713	0	0	0	0	-0.102594	0	0	0	0	0	0	0	0	0	0	0
121	ACTTAGGCATTACTCT.1_1	shNC	0	0	0	1	0	0	0.109265	0	0	0	0	0	0	0	0	0	0	0	0	0	0	0	0	0	0	0	0	0	0	0.126429	0	0.0039452	0	0	0	0	0	0.157226	0	0	0	0	0	0	0	0	0
122	ACTTCGCCATATGCGT.1_1	shNC	0	1	0	1	0	0.0236145	0	0	-0.162476	0	-0.0456913	0	0	0	0	0	0	0	0	0	0	0	0	0.209504	0	0	0	0	0	0	0	0.00858763	0	0	0	0	0	0	0	0	0	0.00203573	0	0	0	0	0
125	AGAACCTAGGTCGAGT.1_1	shNC	0	1	0	0	0	0	0	0	-0.0856906	0	-0.0433626	0	0	0	0	0	0	0	0	0	0	0	0	0.198826	0	0	0	0	0	0.113078	0	0.00619466	0.0056097	0	0	0	0	0	0	0	0	0.00359378	0	0.00679179	0	0	0
132	AGACCATGTTCGGTTA.1_1	shNC	1	0	0	0	0	0.0242827	0	0	-0.217766	0	0	0	0	0	0	0	0.00581802	0	0	0	0	0	0	0.303037	0	0	0	0	0	0.174676	0	0.00667728	0	0	0	-0.0966831	0	0	0	0	0	0.00343804	0	0.00945609	0	0	0
134	AGACTCAAGTGGTGGT.1_1	shNC	0	0	0	0	0	0	0	0	-0.249734	0	0	0	0	0	0	0	0	0	0	0	0	0	0	0.322019	0	0	0	0	0	0.14854	0	0.00876661	0	0	0	0	0	0	0	0	0	0	0	0	0	0	0
135	AGACTCACAATCAGCT.1_1	shNC	1	1	0	0	1	0.0238351	0.0865234	0.0463806	-0.0777629	0	-0.0630317	0	0	0	0	-0.00641751	0	0	0	0	0	0	0	0.249286	0	0	0	0	0	0.104395	0	0	0.00940404	0	0.00618824	-0.0949009	0	0	0	0	-0.00243663	0.00136443	0	0	0	0	0
137	AGACTCAGTGCTTCAA.1_1	shNC	0	0	0	0	0	0	0	0	0	0	0	0	0	0	0	0	0	0.048751	0	-0.0422432	0	0	0	0	0	0	0	0	0	0	0	0.00426154	0	0	0	0	0	0	0	0	-0.00157883	0	0	0	0	0	0
140	AGAGAGCGTCCTACGG.1_1	shNC	0	0	0	0	1	0	0	0	0	0	0	0	0	0	0	0	0	0	0	0	0	0	0	0.241738	0	0	0	0	0	0	0	0	0	0	0	0	0	0.300154	0	0	0	0	0	0	0	0	0
143	AGATCGTAGTTGTAGA.1_1	shNC	0	0	0	0	0	0.0293247	0	0	-0.144078	0	0	0	0	0	0	0	0	0	0	0	0	0	0	0.289637	0	0	0	0	0	0.128439	0	0	0	0	0	0	0	0	0.0147495	0	0	0	0	0	0	0	0
144	AGATGAATCTTTGGAG.1_1	shNC	0	0	0	0	0	0	0	0	0	0	0	0	0	0	0	0	0.00645909	0	0	-0.0527466	0	0	0	0.170789	0	0	0	0	0	0	0	0.00532114	0	0	0	0	0	0	0	0	0	0	0	0	0	0	0
147	AGCGATTCAGTGGGTA.1_1	shNC	0	1	0	0	0	0	0	0	-0.148833	0	-0.0292981	0	0	0	0	0	0	0	0	0	0	0	0	0.312033	0	0	0	0	0	0.132679	0	0	0	0	0	-0.0844275	0	0	0	-2.52135e-05	0	0	0	0.00825743	0	0	0
151	AGCGATTTCAAGCCTA.1_1	shNC	0	0	0	0	1	0	0.07486	0	-0.103869	0	-0.02921	0	0	0.1163	0	-0.00555242	0.00328098	0	0	0	-0.000398928	0	-0.000610603	0.133934	0	0	0	0.00451847	0	0.0599775	0	0	0.00679975	0.00913463	0	0	0	0	0	-1.62828e-05	-0.00100139	0.00182248	0	0.0053326	0	0	0
152	AGCGCCATCCGTGCGA.1_1	shNC	1	0	1	0	1	0	0	0	0	0	0	0	0	0	0	0	0.00620831	0	0	0	0	0	0	0.225945	0	0	0	0	0	0.11349	0	0.00511454	0	0	0	0	0	0	0	0	0	0	0	0	0	0	0
153	AGCGCTGTCGGCCTTT.1_1	shNC	0	0	0	0	0	0	0	0	0	0	0	0	0	0	0	0	0	0	0	0	0	0	0	0.194149	0	0	0	0	0	0.179078	0	0	0	0	0	-0.162791	0	0	0	0	-0.00224102	0	0	0.0119339	0	0	0
158	AGGACGATCCGAGTGC.1_1	shNC	0	0	0	0	0	0.0251402	0	0	-0.170969	0	0	0	0	0	0	0	0	0	0	0	0	0	0	0.159271	0	0	0	0	0	0.179112	0	0.00686855	0	0	0	0	0	0	0	0	-0.00183843	0.00216726	0	0	0	0	0
159	AGGAGGTCAGCGGTCT.1_1	shNC	0	0	0	0	0	0.0268839	0	0	0	0	0	0	0	0	0	0	0	0	0	0	0	0	0	0	0	0	0	0	0	0	0	0.00530646	0	0	0	0	0	0.211475	0	0	-0.00313911	0	0	0	0	0	0
160	AGGAGGTTCACCCTCA.1_1	shNC	0	0	1	0	1	0.00698154	0.0858372	0.0135854	-0.0343017	0	-0.0164429	0	0	0.0384068	0	-0.00636661	0.00285133	0	0	0	-0.000203386	0	-0.00114477	0.0442303	0	0.0284326	0	0.00230366	0	0.0305785	0	0.00422716	0.00224555	0.00465713	0.00147766	0	0	0.0549184	0	-1.86704e-05	-0.000510541	0	0	0.00611456	0	0	0
163	AGGCCACGTCACAGTT.1_1	shNC	0	0	0	0	1	0	0.136918	0	-0.170447	0	0	0	0	0	0	0	0	0	0	0	0	0	0	0.158673	0	0	0	0	0	0	0	0	0	0	0	0	0	0	0	0	0	0	0	0.00975328	0	0	0
166	AGGCTGCGTCAGGTAG.1_1	shNC	0	1	1	0	1	0.0217501	0	0	0	0	0	0	0	0	0	0	0.00521124	0	0	0	0	0	0	0.260962	0	0	0	0	0	0.0952634	0	0.00429313	0.00699573	0	0	0	0	0	0	-2.58622e-05	0	0	0	0	0	0	0
168	AGGGAGTTCCATCGTC.1_1	shNC	0	0	0	0	0	0	0	0	-0.158053	0	0	0	0	0	0	0	0	0	0	-0.0956859	0	0	0	0	0	0	0	0	0	0	0	0	0	0	0	-0.169366	0	0	0	0	-0.00311064	0.00366702	0	0	0	0	0
170	AGGGCTCAGAGAGGTA.1_1	shNC	0	1	1	0	0	0.0122121	0.06676	0	-0.118609	0	-0.0168733	0	0	0.0671811	0	0	0	0.0631064	0	0	0	0	0	0.121717	0	0	0	0	0	0.105735	0	0.00476502	0.00392791	0	0.00258473	0	0	0.15113	0	-1.45209e-05	-0.00140496	0.00208111	0	0	0	0	0
172	AGGGTGAGTGAGATTA.1_1	shNC	0	0	0	0	0	0	0	0	0	0	0	0	0	0	0	0	0.00723932	0	0	0	0	0	0	0.347748	0	0	0	0	0	0	0	0	0	0	0	-0.120302	0	0	0	0	0	0.00348422	0	0	0	0	0
173	AGGGTGAGTGTCTTCC.1_1	shNC	0	0	0	0	0	0.00668612	0	0	-0.0328502	0	0	0	0	0.0367816	0	-0.00271102	0	0.0150974	0	0	0	0	-0.000926728	0.0423586	0	0	0	0	0	0.0292845	0	0.00131973	0	0	0	-0.0266212	0	0.0525945	0.00336293	0	-0.000837864	0	0	0.00260369	0	0	0
176	AGGGTTTAGACTGAGC.1_1	shNC	0	0	0	0	1	0	0	0	0	0	-0.0209204	0	0	0	0	0	0	0	0	0	0	0	0	0.311037	0	0	0	0	0	0.141655	0	0.00298863	0	0	0	-0.0914895	0	0.119104	0	0	0	0	0	0	0	0	0
177	AGGGTTTCAAGAGATT.1_1	shNC	0	1	0	0	0	0.0341632	0	0	0	0	-0.033959	0	0	0	0	0	0	0	0	0	0	0	0	0	0	0	0	0	0	0	0	0	0.0109883	0	0	0	0	0.193335	0	0	-0.00179731	0.00511802	0	0	0	0	0
178	AGGGTTTTCCTCTCGA.1_1	shNC	1	0	1	0	0	0	0	0	-0.119142	0	-0.0335052	0	0	0	0	0	0	0	0	0	0	0	0	0.25241	0	0	0	0	0	0.250691	0	0	0.00779961	0	0	-0.0965508	0	0	0	0	0	0.00291303	0	0	0	0	0
179	AGGGTTTTCTTCCCAG.1_1	shNC	0	0	0	0	1	0	0	0	-0.109554	0	0	0	0	0	0	0	0	0	0	0	0	0	0	0.32109	0	0	0	0	0	0.183424	0	0.00440124	0.0071719	0	0	-0.0887804	0	0	0	0	0	0.00436918	0	0	0	0	0
182	AGGTCTATCCTTTAGT.1_1	shNC	0	0	0	0	1	0	0	0	-0.220551	0	0	0	0	0	0	0	0	0	0	0	0	0	0	0.284389	0	0	0	0	0	0	0	0	0	0	0	0	0	0	0	0	0	0	0	0	0	0	0
183	AGGTGTTCAGGTCAAG.1_1	shNC	0	0	0	0	0	0	0	0	-0.229788	0	0	0	0	0	0	0	0.00724948	0	0	0	0	0	0	0.191688	0	0	0	0	0	0	-0.00960601	0	0	0	0	0	0	0	0	0	0	0	0	0.0117827	0	0	0
187	AGGTTGTAGTTGCGAG.1_1	shNC	0	1	1	0	1	0	0	0	-0.14996	0	0	0	0	0	0	0	0.00512773	0	0	0	0	0	0	0.193366	0	0	0	0	0	0.178488	0	0.00422433	0	0	0	0	0	0	0	0	-0.00156504	0.00184497	0	0	0	0	0
189	AGTAACCTCATGGGAG.1_1	shNC	0	0	0	0	1	0	0.227574	0	-0.204532	0	0	0	0	0	0	0	0.00750643	0	0	0	0	0	0	0	0	0	0	0	0	0.182331	0	0.00821691	0	0	0	0	0	0	0	0	0	0.0048422	0	0.0162111	0	0	0
190	AGTACCACAAGCGAAC.1_1	shNC	1	0	0	0	0	0.00593305	0.0563631	0.0115451	-0.0677056	0	-0.0532365	0	0	0.0916253	0	-0.0100792	0.0039906	0	0	0	-0.000172842	0	-0.000614463	0.134638	0	0	0	0	0	0.127604	0	0.00203508	0	0.00395772	0	-0.041051	0	0.0466708	0	-1.22595e-05	0	0.00183206	0	0.00231043	0.0099331	0	0
194	AGTCACAAGTCTACCA.1_1	shNC	0	0	0	0	0	0	0	0	0	0	0	0	0	0.128804	0	0	0	0	0	0	0	0	0	0.208053	0	0	0	0	0	0	0	0	0.00753084	0	0	0	0	0.305564	0	0	-0.00240152	0	0	0.00911774	0	0	0
195	AGTCACATCGCCGAGT.1_1	shNC	1	0	0	0	0	0.0297309	0	0	0	0	-0.0410788	0	0	0	0	0	0	0	0	-0.0581714	0	0	0	0	0	0	0	0	0	0.174708	0	0.0058684	0	0	0	0	0	0	0	0	0	0	0	0.0115777	0	0	0
196	AGTCACATCTAGGCCG.1_1	shNC	1	0	1	0	1	0.0143341	0	0	0	0	-0.0119515	0	0	0.0475847	0	-0.00350727	0.00526126	0	0	0	0	0	0	0	0	0	0	0	0	0.0813563	0	0.00366639	0.00461042	0	0	-0.0344402	0	0.112755	0.00720965	-1.70441e-05	0	0.0012357	0	0.00558194	0	0	0
201	AGTGTTGCAATACGAA.1_1	shNC	0	0	0	0	1	0	0	0	0	0	-0.0334252	0	0	0	0	0	0.0057962	0.0546252	0	0	0	0	0	0.280097	0	0	0	0	0	0.193644	0	0.00665689	0	0	0	0	0	0	0	0	0	0.00342871	0	0	0	0	0
203	AGTTAGCGTAGTCGTT.1_1	shNC	0	0	0	0	0	0	0	0	-0.0368156	0	-0.0174906	0	0	0.123681	0	-0.00911602	0.00397853	0	0	-0.0146612	-0.000368777	0	-0.00100249	0.0474719	0	0	0	0	0	0.0328196	0	0.00147904	0.00241012	0	0	0	0	0	0.00376888	-8.90989e-06	-0.000547958	0	0	0.00291799	0.0125451	0	0
204	ATACCGAAGTGCAACG.1_1	shNC	0	0	0	0	1	0.0206832	0	0	0	0	0	0	0	0	0	0	0.00495561	0	0	0	0	0	0	0.252379	0	0	0	0	0	0.0905905	0	0.00408254	0	0	0	-0.0823517	0	0	0	-2.45936e-05	0	0	0	0.0115593	0	0	0
205	ATACCGAGTTCTAAGC.1_1	shNC	0	0	0	0	0	0	0	0	0	0	-0.021516	0	0	0.129374	0	0	0.00373104	0	0	0	0	0	0	0.229535	0	0.0957758	0	0	0	0	-0.00494385	0.00307371	0.00929283	0.0103876	0	0	0	0	0	0	-0.00113875	0	0	0	0	0	0
208	ATAGACCCACCCTCTA.1_1	shNC	0	0	0	0	0	0	0	0	0	0	-0.05108	0	0	0	0	0	0	0.0834776	0	0	-0.00107699	0	0	0	0	0	0	0	0	0.161922	0	0	0	0.0246608	0	0	0	0	0	0	0	0.00538581	0	0.0143965	0	0	0
209	ATAGAGAAGAGCAAGA.1_1	shNC	0	0	1	0	0	0.023911	0.182625	0	0	0	0	0	0	0	0	0	0	0.0539916	0	0	0	0	-0.00106619	0.151484	0	0.0973783	0	0	0	0	0	0.00471965	0	0	0	-0.0952033	0	0	0	0	0	0.0028799	0	0	0	0	0
211	ATAGAGACACCTGCGA.1_1	shNC	0	0	0	0	1	0	0	0	0	0	0	0	0	0	0	0	0	0	0	0	0	0	0	0.260637	0	0	0	0	0	0.111029	0	0	0	0	0	0	0	0	0	0	-0.00256192	0.00354658	0	0	0	0	0
212	ATAGAGAGTCTCAGGC.1_1	shNC	0	1	0	0	0	0	0	0	0	0	0	0	0	0	0	0	0	0	0	0	0	0	0	0.189088	0	0	0	0	0	0.130725	0	0	0	0	0	-0.118836	0	0	0	0	0	0	0	0	0	0	0
213	ATAGAGATCTGGTGCG.1_1	shNC	0	0	0	0	0	0	0	0	0	0	0	0	0	0	0	0	0	0	0	0	0	0	0	0.183695	0	0	0	0	0	0.0880251	0	0	0	0	0	0	0	0	0.0101085	0	-0.00146967	0.00173254	0	0	0	0	0
214	ATAGGCTCAGACTCTA.1_1	shNC	0	0	0	0	0	0.0307262	0	0	0	0	-0.0424541	0	0	0	0	0	0	0	0	-0.0601189	0	0	0	0.19466	0	0	0	0	0	0.285074	0	0	0	0	0	0	0	0	0	0	0	0.00407724	0	0.0119653	0	0	0
221	ATCACTTGTGATCATC.1_1	shNC	0	0	0	0	0	0	0	0	0	0	-0.0609656	0	0	0	0	-0.00865255	0	0	0	0	0	0.0862718	0	0.135193	0	0	0	0	0	0.0934654	0	0	0.00686368	0.0142348	0.00451658	0	0	0.167862	0	0	0	0	0	0	0	0	0
223	ATCCACCCAGCGATTT.1_1	shNC	0	0	0	0	1	0	0	0	0	0	0	0	0	0	0	0	0	0	0	0	0	0	0	0.171878	0	0	0	0	0	0.118827	0	0.00852915	0	0	0	0	0	0	0	0	-0.00270741	0.0023388	0	0	0	0	0
224	ATCCATTGTTGCTAGT.1_1	shNC	0	0	0	0	0	0	0	0	-0.231329	0	0	0	0	0	0	0	0	0	0	0	0	0	0	0	0	0	0	0	0	0	0	0.0060274	0.0131125	0	0	0	0	0	0	0	0	0	0	0	0	0	0
225	ATCCCTGAGGCTATCT.1_1	shNC	0	0	0	0	0	0	0.154237	0	0	0	-0.0575138	0	0	0.106924	0	0	0.00465691	0	0	0	0	0	0	0.342721	0	0	0.0314313	0	0	0.148707	-0.0061707	0	0.0109204	0	0	0	0	0	0	-2.31112e-05	0	0	0	0	0	0	0
226	ATCCCTGAGGGAGGTG.1_1	shNC	0	1	1	0	1	0	0	0	-0.0971274	0	-0.0395264	0	0	0	0	0	0	0	0	0	0	0	0	0.2449	0	0.0805086	0	0	0	0.0865849	0	0	0	0	0	0	0	0.155505	0	0	0	0.00333244	0	0	0	0	0
228	ATCCCTGCAAGTGGCA.1_1	shNC	0	1	0	0	0	0	0	0	0	0	0	0	0	0	0	0	0	0	0	0	0	0	0	0	0	0	0	0	0	0.117311	0	0.0072318	0.0117843	0	0	0	0	0	0	-3.18476e-05	0	0.00230895	0	0	0	0	0
230	ATCCGTCGTAGCCAGA.1_1	shNC	0	0	0	0	1	0	0	0	0	0	0	0	0.0231716	0	0	0	0	0	0	0	0	0	0	0	0	0	0	0	0	0.14357	0	0.00647012	0.0105432	0	0	-0.197405	0	0	0	-3.89766e-05	-0.00239706	0.00372374	0	0.0127648	0	0	0
231	ATCCGTCTCTGGGATT.1_1	shNC	0	0	0	0	1	0.0107582	0.0588119	0.0209343	-0.0528571	0	0	0	0	0.0949885	0	0	0.00257762	0	0	0	0	0.0698067	0	0.139047	0	0.0438131	0	0.00354982	0	0.154704	-0.00812931	0.00340821	0.00346028	0.00717639	0.00541954	-0.0428345	0	0.135825	0	0	-0.00160499	0.00268582	0	0.00672403	0	0	0
232	ATCGCCTAGCTGACTT.1_1	shNC	1	0	0	0	1	0	0	0	0	0	0	0	0	0	0	0	0	0	0	0	0	0	0	0.316629	0	0	0	0.00717889	0	0	0	0	0	0	0	0	0	0	0	0	0	0.00430848	0	0.00847239	0	0	0
233	ATCGCCTAGTAAGCAT.1_1	shNC	1	1	1	0	1	0	0	0	0	0	-0.0194483	0	0	0	0	0	0	0	0	0	0	0	0	0.137032	0	0	0	0	0	0.0947368	0	0	0.00452733	0	0	-0.122581	0	0	0	0	-0.00102932	0.00121343	0	0	0	0	0
234	ATCGGATCACTCTAGA.1_1	shNC	1	0	0	0	1	0.0484345	0	0	0	0	0	0	0	0	0	0	0	0.109366	0	0	0	0	0	0	0	0	0	0	0	0	0	0	0	0	0	-0.237358	0	0	0	0	0	0.00417539	0	0	0	0	0
240	ATGAAAGAGTCGAAGC.1_1	shNC	0	0	0	0	0	0	0	0	0	0	0	0	0	0	0	0	0	0	0	0	0	0	0	0	0	0	0	0	0	0	0	0.00964839	0	0	0	0	0	0	0	0	0	0.00328604	0	0	0	0	0
241	ATGAAAGCACACCTTC.1_1	shNC	0	0	0	0	0	0	0	0	-0.194934	0	0	0	0	0	0	0	0	0	0	0	0	0	0	0	0	0	0	0	0	0	0	0.00783131	0.0127613	0	0	0	0	0	0	0	0	0	0	0	0	0	0
244	ATGACCACATATACCG.1_1	shNC	1	0	0	0	1	0.0117855	0	0.0229333	-0.0579043	0.00847825	-0.0513739	0	0	0.102583	0	0	0.00282375	0	0	0	0	0	0	0.0746646	0	0	0	0	0	0.0816739	-0.00592017	0.00463995	0.00599777	0.0156808	0	0	0	0	0	-2.21729e-05	-0.00136363	0	0	0.00458946	0	0	0
250	ATGATCGAGGCTCAAG.1_1	shNC	0	1	0	0	1	0	0	0	0	0	0	0	0	0	0	0	0	0	0	0	0	0	0	0	0	0	0	0	0	0.161141	0	0.00531379	0	0	0	0	0	0	0	0	0	0	0	0	0	0	0
252	ATGATCGGTGCAACAG.1_1	shNC	0	1	0	0	1	0	0	0	-0.201866	0	0	0	0	0	0	0	0	0	0	-0.0803897	0	0	0	0	0	0	0	0	0	0	0	0	0	0	0	0	0	0	0	0	0	0.00354193	0	0	0	0	0
257	ATGGGAGCAGAAATCA.1_1	shNC	0	0	0	0	0	0	0.14787	0	0	0	0	0	0	0	0	0	0	0	0	0	0	0	0	0	0	0	0	0	0	0.237022	0	0	0	0	0	-0.147053	0	0	0.013605	0	-0.00197804	0	0	0.0143825	0	0	0
260	ATGGTTGAGTTCCGGC.1_1	shNC	1	0	0	0	1	0	0.124949	0	-0.0739151	0	-0.0207864	0	0	0	0	0	0.00360452	0	0	0	0	0	0	0.178467	0	0	0	0.00496404	0	0.177462	0	0.00556036	0	0	0	0	0	0	0	0	-0.00167143	0.00277606	0	0	0	0	0
262	ATGTCCCAGGCGACAT.1_1	shNC	0	0	0	0	0	0	0	0	-0.140766	0	0	0	0	0	0	0	0	0.0646936	0	0	-0.000834646	0	0	0.18151	0	0	0	0.00945364	0	0	0	0.00565515	0	0	0	0	0	0	0.0194669	0	0	0.00246987	0	0	0	0	0
263	ATGTCCCCAAGGTCGA.1_1	shNC	0	0	0	0	0	0	0	0	0	0	-0.0416115	0	0	0.165676	0	0	0	0	0	0	0	0	0	0.190797	0	0	0	0	0	0.131907	0	0	0.00968666	0	0	0	0	0	0	0	0	0	0	0	0	0	0
264	ATGTCCCGTAATTAGG.1_1	shNC	1	1	0	0	1	0.0283968	0	0	-0.0962537	0	-0.0270684	0	0	0	0	0	0	0	0	0	0	0	-0.000873551	0.265017	0	0	0	0	0	0	0	0.00386692	0.00630121	0	0	0	0	0	0	0	0	0.00294371	0	0	0	0	0
267	ATTACTCCATATCTCT.1_1	shNC	1	1	0	0	1	0	0	0	-0.103839	0	0	0	0	0	0	0	0.00723848	0	0	0	0	0	0	0.295973	0	0	0	0	0	0	0	0.00596321	0	0	0	-0.0841495	0	0.166251	0	0	0	0	0	0	0	0	0
269	ATTACTCTCAGCCCAG.1_1	shNC	0	0	0	0	1	0.0236927	0	0	0	0	0	0	0	0	0	0	0	0	0	0	0	0	0	0.210069	0	0	0.038314	0	0	0.14523	0	0.00773326	0	0	0.00501462	-0.0943341	0	0	0	0	-0.00242478	0.00285848	0	0	0	0	0
271	ATTACTCTCGGAGTGA.1_1	shNC	0	1	0	0	0	0	0	0	-0.133189	0	-0.0374555	0	0	0	0	0	0.00649508	0	0	0	0	0	0	0	0	0	0	0	0	0.208917	0	0	0	0	0	-0.107934	0	0	0	0	0	0	0	0.0144081	0	0	0
273	ATTATCCGTGCGGCTT.1_1	shNC	0	0	0	0	1	0	0	0	0	0	-0.0243436	0	0	0	0	0	0	0	0	0	0	0	0	0.265701	0	0	0	0	0	0	0	0.00513859	0.00566691	0	0	0	0	0.138593	0	0	0	0	0	0	0	0	0
274	ATTCACTTCGGTCAGC.1_1	shNC	0	0	1	0	0	0	0.149749	0	0	0	-0.0378484	0	0	0	0	0	0	0	0	-0.0535969	0	0	0	0	0	0	0	0.00903867	0	0	0	0.00736536	0.00881067	0	0	0	0	0	0	0	0	0.00375117	0	0	0	0	0
275	ATTCAGGCAAATCAGA.1_1	shNC	0	1	1	0	0	0	0	0	-0.159036	0	0	0	0	0	0	0	0	0.0519392	0	0	0	0	0	0	0	0	0	0	0	0.187256	0	0.00454024	0	0	0	-0.170226	0	0	0.0115694	0	-0.00168208	0.00198294	0	0.0089574	0	0	0
277	ATTCAGGTCCTATGGA.1_1	shNC	0	1	0	0	1	0.00581535	0.0741188	0.0197089	-0.028572	0	-0.0260312	0	0	0	0	-0.00235795	0.00139333	0	0	0	-0.000169413	0	0	0.0368421	0	0	0.00940413	0.00447373	0	0.100098	0	0.00114786	0.00735073	0	0	0	0	0	0	0	-0.00042526	0.00197016	0	0.00394419	0	0	0
279	ATTCATCCAACCGCCA.1_1	shNC	1	1	1	0	0	0.024266	0	0	-0.119224	0	0	0	0	0	0	0	0	0	0	0	0	0	0	0.214197	0	0	0	0	0	0	0	0.00478973	0	0	0	-0.134617	0	0.190882	0.0170055	0	0	0.00291466	0	0	0	0	0
280	ATTCATCGTAGGCTCC.1_1	shNC	0	0	0	0	1	0	0	0	0	0	-0.034587	0	0	0	0	0	0	0.0565239	0	-0.0489784	0	0	0	0.219686	0	0	0.0404805	0	0	0	0	0.004941	0	0	0	0	0	0	0	0	0	0.0038991	0	0	0	0	0
281	ATTCCCGCAACCGTAT.1_1	shNC	0	0	0	0	0	0.0275378	0.10315	0	-0.092706	0	0	0	0	0.151491	0	0	0	0	0	0	0	0	0	0.174461	0	0	0	0	0	0.120613	0	0.00372439	0	0	0	-0.0751273	0	0	0	0	-0.00137982	0.00162662	0	0.00734783	0	0	0
285	ATTCTACAGGGCCCTT.1_1	shNC	1	0	0	0	1	0	0	0	0	0	0	0	0	0	0	0	0	0	0	0	0	0	0	0	0	0	0	0	0	0.186637	0	0.00525279	0	0	0	0	0	0	0	0	0	0.00367345	0	0.014193	0	0	0
286	ATTCTACGTCCCTAAA.1_1	shNC	0	0	0	0	0	0.0134784	0	0	0	0	-0.0674278	0.0231905	0	0.074147	0	0	0	0	0	0	0	0	0	0.241008	0	0	0	0	0	0	-0.0042791	0.00266041	0	0.00899091	0.00285273	0	0	0	0	0	-0.000985635	0	0	0.00524871	0	0	0
287	ATTCTTGAGTTCACTG.1_1	shNC	1	1	1	0	1	0	0	0	0	0.0149186	0	0	0	0	0	0	0.00496876	0	0	0	0	0	0	0.188462	0	0.0844566	0.0335361	0	0	0	0	0.00409337	0	0	0.00438928	-0.118443	0	0	0	0	-0.00151652	0.00256447	0	0	0	0	0
288	ATTCTTGCACTTGTCC.1_1	shNC	0	0	1	0	1	0.0222467	0	0	-0.109303	0	-0.0517251	0	0	0	0	0	0	0	0	0	0	0	0	0.286898	0	0	0	0	0	0.137971	0	0	0	0	0	-0.125423	0	0	0	0	0	0.00191782	0	0.00866327	0	0	0
289	ATTCTTGCAGGGAGAG.1_1	shNC	0	0	0	0	0	0	0	0	0	0	-0.0383539	0	0	0.0755532	0	-0.00239568	0.00246119	0	0	0	0	0.0238866	0	0	0	0	0	0.00194957	0	0	0	0.00202758	0.00190039	0	0	-0.0235248	0	0.046477	0	-1.63305e-05	-0.000432066	0.000885539	0	0	0	0	0
296	ATTTCTGCATGACCCG.1_1	shNC	0	0	0	0	1	0	0.176267	0	0	0	0	0	0	0	0	0	0	0	0	0	0	0	0	0	0	0	0	0	0	0	0	0	0.0137077	0	0	-0.128381	0	0	0	0	0	0.00367397	0	0.0125563	0	0	0
300	CAACAACTCAATGCAC.1_1	shNC	0	1	1	0	0	0.0340716	0	0	0	0	0	0	0	0	0	0	0	0.0553147	0	0	0	0	0	0	0	0	0	0	0	0.107294	0	0.0048353	0	0	0	0	0	0	0	0	-0.00179139	0.0021118	0	0	0	0	0
302	CAACAACTCGAGAGCA.1_1	shNC	0	1	0	0	0	0	0	0	0	0	-0.0625944	0	0	0	0	0	0	0	0	0	0	0	0	0.141026	0	0	0	0	0	0.138039	0	0	0	0	0	0	0	0	0	0	0	0.00360618	0	0	0	0	0
303	CAACAGTGTCACAGTT.1_1	shNC	1	1	0	0	0	0.00811243	0.0966046	0.0263904	0	0.00583593	-0.0495642	0.0233345	0	0.097214	-0.00647183	0	0.0019437	0	0	0	0	0	0	0.178485	0	0.0719676	0	0	0.0204402	0.191171	-0.00828536	0	0.00568386	0.00904675	0.00287045	-0.0539983	0	0	0.00888826	0	-0.00173523	0.00224977	0	0.00315912	0	0	0
307	CAAGACTTCGAGCCAC.1_1	shNC	0	1	0	0	0	0.0248553	0	0	-0.169391	0	0	0	0	0	0	0	0	0	0	0	0	0	0	0.256952	0	0	0	0	0	0.108864	0	0.00490604	0	0.01658	0	-0.161487	0	0	0	0	-0.00296594	0	0	0	0	0	0
308	CAAGACTTCTGGCTGG.1_1	shNC	0	0	1	0	1	0.0325045	0	0	0	0	0	0	0	0	0	0	0.00778793	0.0522058	0	0	0	0	0	0.205926	0	0	0	0	0	0	0	0.00641586	0	0	0	-0.0920543	0	0	0	0	-0.00169071	0.00199311	0	0.0126578	0	0	0
309	CAAGACTTCTTTCTAG.1_1	shNC	0	1	0	0	1	0	0	0	-0.109453	0	0	0	0	0	0	0	0	0.0329336	0	0	0	0	0	0.174449	0	0	0	0	0	0.120605	0	0.0043972	0	0	0	0	0	0	0	0	0	0.00323047	0	0.00867519	0	0	0
311	CAAGCTACAAACTAGA.1_1	shNC	0	0	1	0	0	0.0120784	0.0388184	0	0	0	-0.00981119	0	0	0.0664457	0	-0.0112466	0.00289394	0	0	0	0	0.0287074	-0.000316626	0.0765206	0	0.0289185	0	0.00234303	0	0.0529023	0	0.00238409	0	0	0	-0.0633642	0	0.0558571	0.00357154	-1.4362e-05	-0.000883261	0.00137193	0	0.00470355	0	0	0
312	CAAGGGACATGCCATA.1_1	shNC	0	1	0	0	1	0	0	0	0	0	0	0	0	0	0	0	0	0	0	0	0	0	0	0.25901	0	0	0	0	0	0	0	0	0	0	0	0	0	0	0	0	0	0	0	0	0	0	0
314	CAATACGCATAACAGA.1_1	shNC	0	0	0	0	0	0	0	0	-0.160711	0	0	0	0	0	0	0	0	0	0	0	0	0	0	0.207228	0	0	0	0	0	0	0	0.00851134	0	0	0	0	0	0	0	-3.88942e-05	0	0	0	0	0	0	0
316	CAATACGTCGAGTCCG.1_1	shNC	0	0	0	0	0	0	0	0	0	0	-0.0496942	0	0	0	0	0	0	0	0	0	0	0	-0.00160373	0	0	0	0	0	0	0	0	0	0	0	0	0	0	0	0	0	0	0	0	0.0140059	0	0	0
318	CAATTTCTCCACTTCG.1_1	shNC	1	1	1	0	1	0.0124301	0	0	-0.167204	0	0	0	0	0.0683802	0	0	0	0	0	0	0	0	0	0.215601	0	0	0	0	0	0.10714	0	0.00384888	0.00399802	0	0	-0.0494912	0	0	0	0	-0.000908977	0.00107156	0	0.00952578	0.0208104	0	0
319	CACAACATCACGTCCT.1_1	shNC	0	0	0	0	0	0	0	0	-0.0613752	0	-0.0172599	0	0	0.107717	0	-0.0147624	0.00299301	0	0	0	-0.000363914	0	-0.000557011	0.0791402	0	0	0	0	0	0	0	0.00484622	0	0	0	-0.0497374	0	0.0982642	0	0	-0.000913499	0	0	0	0	0	0
320	CACACAACATCGAACT.1_1	shNC	0	0	1	0	0	0.0296297	0	0	0	0	0	0	0	0	0	0	0.00709915	0	0	0	0	0	0	0.187713	0	0	0	0	0	0.129775	0	0	0.00953012	0	0	0	0	0	0	0	0	0.00467362	0	0	0.049606	0	0
321	CACAGGCCATCGCTGG.1_1	shNC	0	1	0	0	0	0.0146162	0.0799023	0	0	0	-0.020195	0	0	0	0	0	0	0.0330037	0	0	0	0	0	0.092598	0	0	0	0	0	0.0640174	0	0.002885	0.00470116	0.0097499	0	-0.0581953	0	0	0	0	-0.00106884	0.00343567	0	0	0	0	0
323	CACCGTTCACTCCTTG.1_1	shNC	0	0	1	0	1	0.00697508	0	0.0231386	-0.03427	0	-0.0326971	0	0	0.0383712	0	0	0.00284902	0	0	0	-0.000346407	0	-0.000699626	0.0441893	0	0.0638992	0	0	0	0.103649	-0.00221444	0.00234708	0.00688383	0	0	-0.0473446	0	0	0.00598082	-8.2938e-06	-0.000869552	0.00236558	0	0.0073162	0	0	0
324	CACCGTTGTCTTGTCC.1_1	shNC	0	0	0	0	0	0	0	0	0	0	0	0	0	0	0	0	0	0	0	-0.0796731	0	0	0	0.257975	0	0	0	0	0	0.226067	0	0	0	0	0	0	0	0	0	0	0	0.00351036	0	0	0	0	0
326	CACGAATAGGGCCAAT.1_1	shNC	0	0	0	0	1	0	0	0	0	0	0	0	0	0	0	0	0	0	0	0	0	0	0	0.341945	0	0	0	0	0	0	0	0.00937395	0	0	0	0	0	0	0	0	0	0	0	0	0	0	0
328	CACGTTCGTTACTCAG.1_1	shNC	0	1	1	0	1	0.0182486	0.0627933	0	-0.0564354	0	-0.0318596	0	0	0	0	0	0	0	0	-0.0224745	0	0	0	0	0	0	0.0295102	0	0.0289416	0.0799272	-0.00364672	0.0072341	0.00369453	0.00766221	0	-0.0918088	0	0.0903554	0	0	0	0.0019878	0	0.00447304	0	0	0
329	CACGTTCTCCCATGGG.1_1	shNC	1	1	1	0	0	0	0	0	0	0	-0.0245692	0	0	0	0	0	0	0.0401523	0	0	0	0	0	0.352366	0	0	0	0	0	0.204378	0	0.00350989	0	0	0	0	0	0.139878	0	0	-0.00191822	0.00226132	0	0.00692463	0	0	0
330	CACTGAAAGGGCAAGG.1_1	shNC	0	0	0	0	0	0	0	0	0	0	0	0	0	0.198718	0	0	0	0	0	-0.0915093	0	0	0	0.337281	0	0	0	0	0	0	0	0	0	0	0	-0.143825	0	0	0	0	0	0	0	0	0	0	0
335	CACTTCGCAGGAATCG.1_1	shNC	0	1	0	0	0	0	0	0	0	0	0	0	0	0	0	0	0.00838403	0	0	0	0	0	0	0.288679	0	0	0	0	0	0	-0.0111094	0	0	0	0	0	0	0	0	0	0	0.00392816	0	0	0	0	0
336	CACTTCGTCGCAGTCG.1_1	shNC	0	0	0	0	1	0.0326497	0	0	-0.160415	0	-0.0451118	0	0	0	0	0	0	0	0	0	0	0	0	0.272772	0	0	0	0	0	0	0	0	0	0	0	0	0	0	0.0164219	0	0	0	0	0	0	0	0
337	CAGATTGAGCCAAGTG.1_1	shNC	0	0	0	0	0	0	0	0	-0.21136	0	0	0	0	0	0	0	0.00646037	0	0	0	0	0	0	0.301108	0	0	0	0	0	0.118098	0	0	0	0	0	0	0	0	0	0	-0.00197177	0.00317571	0	0	0	0	0
339	CAGATTGGTGCAAGAC.1_1	shNC	0	0	0	0	0	0	0	0	0	0	0	0	0	0	0	0	0	0	0	0	0	0	0	0.258125	0	0	0	0	0	0.178454	0	0	0	0	0	-0.187368	0	0	0	0	0	0.00542269	0	0	0	0	0
340	CAGCAATCAGGTGACA.1_1	shNC	1	0	0	0	0	0	0	0	-0.148382	0	0	0	0	0	0	0	0	0.037359	0	0	0	0	0	0.270996	0	0	0	0	0	0.196462	0	0.00596112	0	0	0	-0.0658751	0	0	0.00832168	0	0	0.00324455	0	0.00962724	0	0	0
342	CAGCGTGAGTTGGAAT.1_1	shNC	1	0	0	0	1	0	0	0	0	0	-0.049247	0	0	0.142438	0	0	0	0	0	0	0	0	0	0.363468	0	0	0	0.00854352	0	0	0	0.00511072	0.008328	0	0	0	0	0	0	0	0	0.00223209	0	0	0	0	0
343	CAGCGTGGTTCGGGTC.1_1	shNC	0	0	0	0	0	0	0.213769	0	-0.192125	0	0	0	0	0	0	0	0	0	0	0	0	0	0	0	0	0	0	0	0	0	0	0	0	0	0	0	0	0	0	0	0	0	0	0.0152277	0	0	0
345	CAGTGCGCAATGTGGG.1_1	shNC	0	0	0	0	0	0	0	0.028834	0	0	0	0	0	0.12417	0	0	0.00667473	0	0	0	0	0	0	0.201937	0	0	0	0	0	0.0988606	0	0.00549879	0	0.00988443	0	0	0	0.21914	0	0	0	0	0	0.00577032	0	0	0
346	CAGTTCCAGCCGGATA.1_1	shNC	1	1	1	0	0	0	0	0	-0.0776607	0	-0.0218397	0	0	0	0	0	0.00378718	0.0356916	0	0	0	0	0	0.185052	0	0	0	0	0	0.172208	-0.0124826	0.00469956	0	0	0	-0.0629348	0	0	0	-1.87949e-05	-0.00115589	0.00205252	0	0	0	0	0
348	CAGTTCCCAGCTGAAG.1_1	shNC	0	1	0	0	1	0.0201381	0	0	-0.142696	0	-0.0278246	0	0	0	0	0	0	0	0	0	0	0	0	0	0	0.0820131	0	0	0	0	0	0.00397494	0	0	0	-0.115638	0	0.228461	0	0	0	0.00173604	0	0.00784213	0.0337152	0	0
349	CAGTTCCGTTCCACAA.1_1	shNC	0	0	1	0	0	0	0.184624	0	-0.165931	0	0	0	0	0	0	0	0	0	0	0	0	0	0	0.213959	0	0	0	0	0	0	0	0	0	0	0	0	0	0	0	0	0	0	0	0	0	0	0
353	CATCAAGCACCATATG.1_1	shNC	0	0	0	0	1	0.0260924	0	0.0343789	0	0	-0.0495566	0	0	0	0	0	0	0	0	-0.034568	-0.000514686	0	0	0.165304	0	0	0	0	0	0.0773815	0	0.00515023	0.00568255	0	0	-0.0703439	0	0	0	-3.10255e-05	-0.00129197	0	0	0.0139671	0	0	0
357	CATGAGTGTATGAGCG.1_1	shNC	0	1	0	0	0	0	0	0	0	0	0	0	0	0.183903	0	0	0	0	0	0	0	0	0	0	0	0	0	0	0	0	0	0	0	0	0	0	0	0	0	0	0	0.00433594	0	0	0	0	0
358	CATGCAAAGACAACTA.1_1	shNC	0	0	0	0	1	0.0250369	0	0	0	0	0	0	0	0	0	0	0	0	0	0	0	0	0	0.286577	0	0	0	0	0	0	0	0.00494189	0	0	0	0	0	0.196946	0	0	0	0	0	0	0	0	0
359	CATGCAACATCATTTC.1_1	shNC	0	0	0	0	0	0	0	0	-0.112798	0	0	0	0	0	0	0	0	0	0	0	0	0	0	0.270512	0	0	0	0	0	0.100554	0	0.00637924	0	0	0	0	0	0	0	0	-0.00236339	0	0	0	0	0	0
360	CATGCGGCACTTCCTG.1_1	shNC	0	1	1	0	1	0.0156141	0	0	-0.142232	0	-0.0215739	0	0	0	0	0	0.00374108	0	0	-0.0305506	0	0	0	0.1834	0	0	0	0	0	0.103233	-0.0074829	0.00716352	0	0	0	-0.0621687	0	0.122824	0	-3.4422e-05	0	0.00203187	0	0	0	0	0
361	CATGGATGTACGCGTC.1_1	shNC	0	1	0	0	0	0	0	0	-0.121369	0	0	0	0	0	0	0	0	0	0	0	0	0	0	0	0	0	0	0	0	0	0	0.00677112	0.00794539	0	0	-0.0983554	0	0	0	0	0	0.00348091	0	0.00961965	0	0	0
363	CATGGTATCCCAACTC.1_1	shNC	0	1	1	0	0	0	0	0	-0.106389	0	0	0	0	0	0	0	0.00518816	0	0	0	0	0	0	0	0	0	0	0	0	0.134966	0	0	0	0	0	-0.146173	0	0	0	0	-0.0022534	0.00316486	0	0	0	0	0
366	CATTGAGAGTAGACCG.1_1	shNC	0	1	0	0	0	0	0	0	0	0.0172141	-0.0507261	0	0	0.131638	0	0	0	0	0	0	0	0	0	0.151598	0	0.0647657	0	0	0	0.172834	-0.00504889	0.00313901	0.00943693	0.0106083	0.00336592	0	0	0	0	0	0	0	0	0	0	0	0
367	CATTGAGCATGCGGTC.1_1	shNC	0	0	0	0	1	0.0174547	0	0	0	0	-0.024117	0	0	0	0	0	0	0.0394133	0	-0.0341519	0	0	0	0.246573	0	0	0	0	0	0.113152	0	0.00619824	0	0	0	0	0	0	0	0	-0.00127642	0.0022271	0	0.00679718	0	0	0
369	CATTGCCGTCATAGTC.1_1	shNC	0	1	0	0	0	0	0	0	0	0	0	0	0	0	0	0	0.00696325	0	0	0	0	0	0	0	0	0	0.0325921	0	0	0.198938	0	0	0	0	0	0	0	0	0	0	0	0.00173745	0	0	0	0	0
371	CATTGTTAGTGCACTT.1_1	shNC	1	0	0	0	0	0.0222094	0	0	-0.154558	0	-0.0306865	0	0	0	0	0	0.00532129	0	0	-0.043455	0	0	0	0.140704	0	0	0	0	0	0.210732	-0.00705104	0.00438379	0.0101181	0.0209843	0.00470069	-0.0884285	0	0	0	0	0	0.00322335	0	0	0	0	0
373	CATTTCAAGGCTAAAT.1_1	shNC	0	0	0	0	1	0	0	0	0	0	0	0	0	0	0	0	0	0	0	0	0	0	0	0.237065	0	0	0	0	0	0	0	0	0.00884108	0	0	0	0	0.216222	0	-3.26842e-05	0	0	0	0.0107041	0	0	0
377	CCAATGAGTGAACTAA.1_1	shNC	0	0	0	0	0	0	0	0	-0.163024	0	-0.0458455	0	0	0	0	0	0	0	0	-0.0767031	0	0	0	0.298565	0	0	0	0	0	0.145329	0	0.0077379	0	0	0	-0.0944124	0	0	0.0119267	0	0	0.00204417	0	0	0	0	0
378	CCAATGAGTGGATCGA.1_1	shNC	0	1	0	0	0	0	0.0985592	0.0350826	0	0	-0.044421	0	0	0.145945	0	0	0	0	0	0	0	0	0	0.297863	0	0	0	0	0	0.116197	-0.00572383	0.00523654	0	0	0.00561508	0	0	0	0	0	0	0.00228704	0	0	0	0	0
383	CCACGAGCATAGAGGC.1_1	shNC	1	1	1	0	1	0.0142043	0	0.0276401	0	0	-0.0526217	0	0.00605035	0.0781405	0	0	0	0.0193265	0	0	0	0	0	0.23367	0	0	0	0.00282417	0	0.135677	0	0.00363651	0.00700977	0	0	-0.0340784	0	0.111734	0.00430496	0	-0.00134726	0.0021207	0	0.00333303	0	0	0
384	CCACGAGGTTGTGGAG.1_1	shNC	0	0	0	0	0	0	0	0	0	0	0	0	0	0	0	0	0.00603431	0	0	0	0	0	0	0.259414	0	0	0	0	0	0.11031	0	0.00808234	0	0	0	0	0	0.198114	0	0	0	0.00300421	0	0	0	0	0
385	CCACTTGAGCACTCCG.1_1	shNC	0	1	0	0	0	0	0	0	-0.0814625	0	-0.0229089	0	0	0	0	0	0	0	0	0	0	0	0	0	0	0	0	0	0	0	0	0.0032727	0	0	0	0	0	0	0	0	0	0.00213497	0	0	0	0	0
386	CCACTTGAGGAACATT.1_1	shNC	1	0	0	0	1	0	0.150756	0	-0.135492	0	-0.038103	0	0	0	0	0	0	0	0	0	0	0	0	0.376464	0	0.112309	0	0	0.0694839	0.16433	0	0	0	0	0	0	0	0	0	0	-0.00201664	0	0	0.010739	0	0	0
387	CCACTTGCAAGAGTTA.1_1	shNC	0	1	1	0	1	0.0218833	0.11963	0	0	0	0	0	0	0	0	0	0.00524316	0	0	0	0	0	0	0.196907	0	0	0	0	0	0.136131	0	0	0	0	0	0	0	0	0	0	-0.00160027	0.0018865	0	0	0	0	0
388	CCATCACGTCCCACGA.1_1	shNC	1	1	0	0	1	0	0	0	-0.177991	0	-0.0247791	0	0	0	0	0	0.00429689	0	0	0	0	0	-0.00079967	0.22951	0	0	0	0	0	0.115695	0	0	0	0	0	0	0	0	0	0	0	0.00312302	0	0	0	0	0
391	CCCGAAGAGTAACAGT.1_1	shNC	0	0	0	0	0	0	0	0	0	0	0	0	0	0	0	0	0	0	0	0	0	0	0	0.161508	0	0	0	0	0	0.180928	0	0.00694695	0.00819969	0	0	-0.140132	0	0	0	0	0	0.0021977	0	0	0	0	0
392	CCCGAAGCAGAACCGA.1_1	shNC	0	0	0	0	0	0	0	0	0	0	0	0	0	0.083661	0	0	0.00364372	0	0	0	0	0	-0.000873475	0.124103	0	0	0.0149861	0	0	0.113609	0	0.00182918	0	0.00618176	0	0	0	0.0728974	0.00466111	-1.8083e-05	0	0.00079889	0	0.00592218	0	0	0
393	CCCGGAACACTACCCT.1_1	shNC	0	0	0	0	1	0.0286135	0	0	0	0	0	0	0	0	0	0	0	0	0	0	0	0	0	0.244943	0	0	0	0	0	0	-0.00908418	0	0	0	0	0	0	0	0	-3.40231e-05	0	0	0	0	0	0	0
395	CCCTGATGTAGATCCT.1_1	shNC	0	0	0	0	0	0.0236809	0	0	0	0	0	0	0	0	0	0	0.00567385	0	0	0	0	0	0	0.209984	0	0	0	0	0	0.10372	0	0.00654228	0	0	0	-0.0942872	0	0	0	-2.8158e-05	0	0.0043089	0	0.00922176	0	0	0
396	CCCTTAGTCGGACAAG.1_1	shNC	1	0	0	0	1	0	0	0	0	0	0	0	0	0	0	0	0	0	0	0	0	0	0	0.212165	0	0	0	0	0	0.105045	0	0.00661024	0	0	0	0	0	0	0	0	0	0.00206754	0	0.0130413	0	0	0
397	CCGATCTCATAGAGGC.1_1	shNC	0	1	0	0	1	0	0	0	0	0	0	0	0	0	0	0	0	0	0	0	0	0	0	0.183213	0	0	0	0	0	0.198227	0	0.00983157	0	0	0	0	0	0	0	0	0	0.00390157	0	0	0	0	0
398	CCGATCTTCTGAACGT.1_1	shNC	0	0	0	0	0	0	0	0	0	0	0	0	0	0	0	0	0.00970406	0	0	0	0	0	0	0.420131	0	0	0	0	0	0.177394	0	0.00799441	0	0	0	0	0	0	0	0	0	0	0	0	0	0	0
401	CCGGACAAGAGGCTGT.1_1	shNC	0	1	1	0	0	0	0	0.0115703	-0.0507542	0	-0.032033	0	0	0.0759421	0	-0.0100928	0.0045858	0	0	0	-0.000173218	0	-0.00046062	0.121256	0	0	0	0.00196196	0	0.0260428	0	0.00117364	0.00332261	0	0	0	0	0	0.00299066	0	-0.000755417	0	0	0.00537578	0.00995474	0	0
402	CCGGACACAGAGTGTG.1_1	shNC	0	0	0	0	0	0	0.0643338	0	-0.0578199	0	-0.0257333	0.0202482	0	0.102457	0	0	0	0	0	0	0	0.0475769	0	0.148763	0	0.0479267	0	0	0	0.119334	-0.00864994	0.0059846	0.00755262	0.0181746	0	-0.0468562	0	0	0	0	-0.000860582	0.00101451	0	0.00458277	0.0197024	0	0
405	CCGGTGACATTCAGCA.1_1	shNC	0	1	1	0	1	0	0	0	-0.120861	0	-0.0339886	0	0	0	0	0	0.00819116	0	0	0	0	0	0	0.155844	0	0	0	0	0	0.107743	0	0	0	0	0	0	0	0	0	-2.92501e-05	-0.00179888	0.00385403	0	0	0	0	0
406	CCGTAGGGTGTTAACC.1_1	shNC	0	0	1	0	0	0.026382	0.144223	0	0	0	0	0	0	0	0	0	0	0	0	0	0	0	0	0.167138	0	0	0	0.00870512	0	0	0	0.00520738	0.00848553	0	0	0	0	0	0	0	-0.00192924	0.00227431	0	0	0	0	0
407	CCGTTCACACACCTTC.1_1	shNC	1	1	1	0	0	0.0310393	0.119433	0.0603992	0	0	0	0	0	0	0	0	0.00523455	0	0	0	0	0	0	0.283673	0	0	0	0	0	0.0956896	0	0.00431233	0	0	0	-0.123585	0	0	0	0	-0.00159764	0.00356156	0	0.0120872	0	0	0
408	CCTAACCCAACACGTT.1_1	shNC	0	0	0	0	0	0	0.159988	0	-0.143789	0	0	0	0	0	0	0	0	0	0	0	0	0	0	0	0	0	0	0	0	0.172479	-0.00929132	0	0.00941311	0	0	-0.199911	0	0.359103	0.01472	0	-0.00214013	0.0046372	0	0	0	0	0
409	CCTAACCCAGCTACAT.1_1	shNC	0	1	1	0	0	0	0	0	-0.202044	0	0	0	0	0	0	0	0	0	0	-0.0424492	0	0	0	0.316122	0	0	0	0	0	0	-0.00688784	0.00428233	0.00992684	0	0	0	0	0	0.0155233	0	-0.00158653	0.00187029	0	0.00844857	0.0363224	0	0
412	CCTACGTGTATTCTCT.1_1	shNC	0	1	1	0	0	0.0301117	0	0	-0.0809612	0	0	0	0	0.0906502	0	0	0	0	0	0	0	0	0	0.21688	0	0	0	0	0	0.107921	0	0.00486356	0.0053001	0	0	0	0	0	0	0	-0.00180186	0.00385828	0	0	0	0	0
414	CCTCAACTCAACCTTT.1_1	shNC	0	0	0	0	1	0	0.12783	0	0	0	0	0	0	0	0	0	0	0.0528001	0	-0.0457517	0	0	0	0.245864	0	0	0	0	0	0.189314	0	0	0.0124824	0	0	0	0	0	0	0	-0.00316081	0.00282805	0	0.0151127	0	0	0
417	CCTCCAATCGTCGCTT.1_1	shNC	0	0	0	0	1	0	0	0	0	0	-0.0460134	0	0	0	0	-0.0135031	0.0079791	0	0	0	0	0	0	0	0	0	0	0	0	0.239935	0	0	0	0	0	0	0	0	0	0	-0.00243531	0	0	0	0	0	0
419	CCTCTAGGTCTGTAAC.1_1	shNC	0	1	0	0	0	0	0.0746225	0	-0.067067	0	0	0	0	0	0	0	0.00505188	0.0476105	0	0	0	0	-0.000608667	0	0	0	0	0	0.0343937	0.0597873	0	0.00269437	0.00843437	0	0	-0.0839514	0	0.107377	0	-1.62311e-05	0	0.00287386	0	0	0	0	0
420	CCTCTCCAGGTCGCCT.1_1	shNC	0	1	0	0	1	0	0	0	-0.134668	0	0	0	0	0.150785	0	0	0.0089449	0	0	0	0	0	0	0.275794	0	0	0	0	0	0.120051	0	0.0054102	0	0	0	-0.109133	0	0.21561	0	0	0	0.00236289	0	0	0.0458889	0	0
421	CCTGCATAGCACTTTG.1_1	shNC	1	1	1	0	0	0.0113385	0.0986755	0	-0.0557082	0	0	0	0	0	0	0	0.00271665	0	0	-0.0221848	0	0	0	0.203854	0	0	0	0	0	0.159357	0	0.00679232	0.0058057	0	0	-0.0718684	0	0.141988	0.00570294	0	-0.000829151	0.00228925	0	0	0.0189828	0	0
422	CCTGTTGTCAACCCGG.1_1	shNC	0	0	0	0	0	0	0	0	-0.155682	0	0	0	0	0.123269	0	0	0	0	0	0	0	0	0	0.14196	0	0	0	0	0	0	0	0	0	0	0	0	0	0.176264	0	0	0	0	0	0	0	0	0
423	CCTTCAGGTACCACGC.1_1	shNC	0	0	0	0	1	0.0171536	0	0	0	0	-0.0531931	0	0	0.0587245	0	0	0.00255765	0	0	0	0	0	0	0.180329	0	0.0434737	0.0172626	0	0	0.145477	0	0.00502692	0.00915522	0.0114425	0	-0.0425027	0	0.083971	0	-1.26931e-05	-0.000780623	0.00147876	0	0.00667991	0	0	0
425	CCTTTGGAGGTGCTTT.1_1	shNC	0	0	0	0	1	0	0	0	-0.19775	0	-0.0415343	0	0	0	0	0	0.00720238	0	0	0	0	0	0	0.294899	0	0	0	0	0	0	0	0.00593347	0.0129456	0	0	0	0	0	0	0	0	0.00259143	0	0	0	0	0
426	CCTTTGGCACGCGCAT.1_1	shNC	0	0	0	0	0	0	0	0	0	0	0	0	0	0	0	0	0	0	0	0	0	0	0	0	0	0	0	0	0	0	0	0.00927667	0.0116878	0	0	-0.144682	0	0	0	0	0	0.00405156	0	0	0	0	0
427	CGAAGGAAGAAACTGT.1_1	shNC	1	1	1	0	1	0	0	0.0198227	0	0	-0.0290962	0	0	0.0560402	0	0	0.00244074	0	0	0	0	0	0	0.20469	0	0	0	0	0	0.141512	-0.00782579	0.00201074	0.00792838	0.016443	0.00348934	0	0	0	0	0	-0.000744942	0.00212498	0	0.00959905	0	0	0
428	CGAAGGACACGTGAGA.1_1	shNC	0	0	0	0	1	0	0	0	-0.157749	0	-0.0314661	0	0	0	0	0	0	0	0	0	0	0	0	0	0	0	0	0.00751449	0	0.0997464	0	0.00449515	0	0	0	0	0	0	0	0	0	0	0	0.0125031	0	0	0
429	CGAAGTTTCTTCTTCC.1_1	shNC	0	0	0	0	1	0	0	0.0362926	-0.0916353	0	-0.0257697	0.0320901	0	0	0	0	0.00446866	0	0	0	0	0.0754018	0	0.118159	0	0	0	0	0	0.119471	-0.00592126	0.00368138	0.00599888	0	0.0039475	-0.108606	0	0	0	-2.2177e-05	0	0	0	0.0128318	0	0	0
430	CGAATTGCAGTTCCAA.1_1	shNC	0	0	1	0	0	0	0	0	-0.150353	0	0	0	0	0	0	0	0	0	0	0	0	0	0	0.193872	0	0	0	0	0	0.206541	-0.00971542	0	0.00984278	0	0	0	0	0	0.0153919	0	0	0.0052427	0	0.0119169	0	0	0
431	CGAATTGGTGTGTCGC.1_1	shNC	0	0	0	0	1	0	0	0	0	0	0	0	0	0	0	0	0	0	0	0	0	0	0	0	0	0	0	0	0	0	0	0	0	0	0	-0.166017	0	0	0	0	0	0	0	0	0	0	0
433	CGACAGCGTATCAGCT.1_1	shNC	0	0	0	0	1	0	0	0	0	0	0	0	0	0	0	0	0	0	0	0	0	0	0	0.220972	0	0	0	0	0	0.110429	0	0.00688464	0	0	0	-0.100386	0	0	0	0	-0.00184373	0.00300685	0	0	0	0	0
438	CGAGTGCAGATGAACT.1_1	shNC	0	0	0	0	0	0.0241135	0	0.0469225	-0.118475	0	0	0	0	0	0	0	0.0057775	0	0	0	0	0	0	0.213101	0	0	0	0	0	0	0	0	0	0	0	0	0	0	0	-2.86725e-05	0	0.00289974	0	0	0	0	0
443	CGCAGGTCACGTATAC.1_1	shNC	0	0	0	0	1	0	0	0.0559563	0	0	0	0	0	0	0	0	0	0	0	0	0	0	0	0	0	0	0	0	0	0.125949	0	0.00567598	0.00924912	0	0	0	0	0	0	0	0	0.00334654	0	0	0	0	0
444	CGCAGGTGTGACCGAA.1_1	shNC	0	0	0	0	0	0.0163483	0	0	0	0	-0.0225883	0	0	0	0	0	0.00391699	0.036915	0	-0.0319871	0	0	0	0.189668	0	0	0	0	0	0.0716042	-0.00519026	0	0	0	0	0	0	0	0	0	-0.00119551	0.00258088	0	0.00636633	0	0	0
445	CGCATAACAATTGAAG.1_1	shNC	1	1	1	0	0	0	0	0	0	0	0	0	0	0	0	0	0.00516834	0.0487081	0	0	0	0	0	0.13666	0	0	0	0	0	0.160353	0	0.00425779	0	0	0	-0.122309	0	0	0	0	0	0.00264818	0	0.0119625	0	0	0
446	CGCATAAGTATTCTCT.1_1	shNC	1	0	0	0	1	0	0	0	-0.118201	0	-0.0332404	0	0	0.105283	0	0	0	0	0	0	0	0	0	0.2127	0	0.0979761	0	0.00401101	0	0.173506	-0.00607601	0.00239938	0.00896068	0.0160481	0	0	0	0	0	0	-0.000888926	0	0	0.00936852	0	0	-0.00633089
447	CGCATGGAGTGCACCC.1_1	shNC	0	1	0	0	0	0	0	0	0	0	0	0	0	0	0	0	0	0	0	0	0	0	-0.00132208	0.187841	0	0	0	0	0	0.129864	0	0	0	0	0	0	0	0	0	0	0	0.00255602	0	0.0115462	0	0	0
450	CGCCATTCACGCGCTA.1_1	shNC	0	0	0	0	0	0.0144387	0.149417	0.0429882	-0.07094	0	-0.0199497	0	0	0	0	0	0.00345944	0	0	0	0	0	0	0.0914734	0	0	0	0.00476424	0	0.0632399	0	0.00539492	0.00464406	0	0	0	0	0	0	-1.71684e-05	-0.00199872	0	0	0	0	0	0
451	CGCCATTCACTTGAAC.1_1	shNC	1	1	1	0	1	0	0	0	0	0	-0.0437752	0	0	0	0	0	0	0	0	0	0	0	0	0.200718	0	0	0	0	0	0.211827	0	0	0	0	0	-0.126146	0	0	0	0	0	0	0	0	0	0	0
456	CGGGACTAGGACAGCT.1_1	shNC	0	1	0	0	1	0.00675386	0.0631926	0.0131423	0	0	-0.0347412	0	0.00477428	0.0841292	0	-0.00273848	0	0	0	0	0	0	-0.00103308	0.0968854	0	0	0	0.00222853	0	0.110128	0	0.00301858	0	0	0	-0.0460251	0	0	0	-8.03075e-06	-0.00111833	0.00158157	0	0.00714436	0	0	0
457	CGGGCATAGCGCCTTG.1_1	shNC	0	0	0	0	0	0	0	0	-0.237706	0	0	0	0	0	0	0	0	0	0	0	0	0	0	0.347696	0	0	0	0	0	0	-0.01536	0	0	0	0	0	0	0	0	0	0	0	0	0	0	0	0
459	CGGGTCACAGATCATC.1_1	shNC	0	0	0	0	1	0	0	0	0	0	-0.0372922	0	0	0.148479	0	0	0	0	0	0	0	0	0	0	0	0.109919	0	0.00890584	0	0.118215	0	0.00532746	0.00868118	0	0	0	0	0	0	0	0	0	0	0.0105105	0	0	0
461	CGGTCAGGTATGTGTC.1_1	shNC	0	0	0	0	1	0	0	0	0	0	0	0	0	0	0	0	0	0	0	0	0	0	0	0.254796	0	0	0	0	0	0	0	0	0.00965975	0	0	0	0	0	0	0	0	0	0	0	0	0	0
462	CGGTCAGTCTCCGTGT.1_1	shNC	1	0	1	0	0	0.022484	0	0	0	0	-0.0310659	0	0	0	0	0	0	0	0	0	0	0	-0.00100256	0.238995	0	0	0	0	0	0.0984778	0	0.00627173	0	0	0	-0.126511	0	0.176864	0	0	0	0.00325209	0	0	0	0	0
463	CGTAAGTCATCGGATT.1_1	shNC	1	0	1	0	0	0.0115645	0	0.0225033	0	0.00831929	-0.0554898	0.0463173	0	0.100963	0	0	0	0	0	-0.0226271	0	0	0	0.0732648	0	0	0	0	0	0.161134	-0.00367149	0.00531352	0.00964281	0.00771425	0	0	0	0	0	-1.37509e-05	0	0.00099694	0	0	0	0	0
464	CGTAGTAAGCGATCGA.1_1	shNC	0	0	0	0	1	0	0	0	0	0	0	0	0	0	0	0	0	0	0	0	0	0	0	0.363763	0	0	0	0	0	0	0	0.00640081	0	0	0	0	0	0	0	0	0	0	0	0.0126281	0	0	0
466	CGTAGTATCACCTCGT.1_1	shNC	0	0	0	0	0	0	0	0	0	0	-0.0325355	0.0138006	0	0	0	-0.00954786	0.00321767	0	0	0	0	0	-0.00078102	0.0850805	0	0.0546923	0	0	0	0.0588202	0	0.00464793	0.00257986	0	0.00169765	-0.0534707	0	0	0	-1.59686e-05	-0.000982067	0.00241191	0	0.00682091	0	0	0
467	CGTAGTATCGGTGTTA.1_1	shNC	0	0	0	0	0	0.0167995	0.091838	0	-0.0825393	0	-0.0421951	0.0525442	0	0	0	0	0.00402509	0.0379337	0	0	0	0	0	0.158602	0	0.0684165	0	0	0	0	0	0	0.00805217	0	0	-0.0668884	0	0.132149	0	0	0	0.00298957	0	0.00974893	0	0	0
468	CGTCAAACATGTTACG.1_1	shNC	0	0	0	0	0	0.0189822	0	0	-0.0932635	0	0	0	0	0	0	0	0.00663039	0	0	0	0	0	0	0.120258	0	0	0	0	0	0	0	0.00658768	0.00610546	0	0	0	0	0	0	0	0	0.0016364	0	0	0	0	0
469	CGTCCATAGAAGCGAA.1_1	shNC	0	0	0	0	1	0.017702	0.0605691	0	0	0	-0.0244587	0	0	0.0609512	0	-0.00717763	0.00537681	0	0	0	-0.000515695	0	-0.000494039	0.070193	0	0	0	0	0	0.0775331	0	0.00218694	0.00356367	0.0174333	0	0	0	0.087155	0.00557276	-2.10488e-05	-0.000810223	0	0	0.0101772	0	0	0
472	CGTGATAGTTCTGACA.1_1	shNC	1	1	0	0	0	0	0	0	-0.142024	0	0	0	0	0	0	0	0	0	0	0	0	0	0	0.286634	0	0	0	0	0	0.126609	0	0.00570572	0	0	0	-0.115094	0	0	0	0	-0.00211387	0	0	0	0	0	0
473	CGTGATATCTCCGTGT.1_1	shNC	0	0	0	0	1	0	0	0	0	0	0	0	0	0	0	0	0.0054368	0.0512381	0	0	0	0	0	0.202812	0	0	0	0	0	0	0	0.00447895	0	0	0	0	0	0	0.0161016	0	-0.00165937	0.00195617	0	0.00883648	0	0	0
474	CGTGCTTAGAGGTATT.1_1	shNC	0	0	0	0	0	0	0	0	0	0	-0.0303449	0	0	0	0	0	0.00526205	0	0	0	0	0	0	0.262651	0	0	0	0	0	0.0961923	0	0.00433499	0	0	0	0	0	0.245207	0	0	0	0	0	0	0	0	0
476	CGTTGGGTCTCTGCTG.1_1	shNC	0	0	1	0	0	0	0	0	-0.104078	0	0	0	0	0	0	0	0	0	0	0	0	0	0	0.22892	0	0	0	0	0	0.0927807	0	0	0	0	0	-0.0843427	0	0	0	-2.51882e-05	0	0.00260929	0	0	0	0	0
477	CTAACTTAGCAATTAG.1_1	shNC	0	0	0	0	0	0.0393155	0.214926	0	0	0	0	0	0	0	0	0	0.00941982	0	0	0	0	0	0	0.317664	0	0	0	0	0	0	0	0	0	0	0	0	0	0	0	0	0	0	0	0	0	0	0
480	CTACAGAAGGACTGGT.1_1	shNC	0	0	0	0	1	0.0315716	0.172592	0	-0.20582	0	0	0	0	0.173681	0	0	0	0	0	-0.0617729	0	0	0	0.265394	0	0	0	0	0	0.13828	0	0.00623172	0	0	0	0	0	0	0	0	0	0	0	0	0	0	0
483	CTACATTCAGTTGTTG.1_1	shNC	0	0	0	0	1	0	0	0	-0.173619	0	0	0	0	0	0	0	0	0	0	0	0	0	0	0	0	0	0	0	0	0.201188	0	0	0	0	0	-0.140698	0	0	0	0	-0.00258412	0	0	0	0	0	0
486	CTACCCATCTTAGCAG.1_1	shNC	1	1	0	0	0	0	0.121672	0	-0.183992	0	0	0	0	0	0	0	0	0	0	0	0	0	0	0.199642	0	0	0	0	0	0.0974833	0	0.00439317	0	0	0	0	0	0.175078	0.0111946	0	0	0.00360581	0	0	0	0	0
487	CTACCTGAGTTGGGAC.1_1	shNC	0	0	0	0	1	0	0	0	-0.152986	0	0	0	0	0	0	0	0	0	0	0	0	0	0	0.331638	0	0	0	0	0	0	0	0	0	0	0	-0.123977	0	0	0	0	0	0	0	0	0	0	0
489	CTACCTGGTGCATGAG.1_1	shNC	0	1	1	0	1	0	0	0	-0.125575	0	0	0	0	0	0	0	0	0	0	0	0	0	0	0.223438	0	0	0	0	0	0.200868	0	0	0	0	0	0	0	0	0	0	0	0.00220334	0	0	0	0	0
490	CTACCTGTCACAACCA.1_1	shNC	1	1	1	0	1	0.0163793	0	0	0	0.011783	-0.0414224	0	0	0.0901058	0	0	0	0	0	0	0	0	0	0.15533	0	0	0	0	0	0	0	0.0048395	0.00788605	0	0	0	0	0.128844	0	0	-0.00249332	0.00366647	0	0	0	0	0
491	CTACGGGTCACACCCT.1_1	shNC	1	0	0	0	0	0	0	0	0	0	0	0	0	0	0	0	0	0	0	0	0	0	0	0	0	0	0.069507	0	0	0	0	0	0	0	0	0	0	0	0	-5.11081e-05	0	0.00465297	0	0.0167379	0	0	0
492	CTACTATGTTCGTACA.1_1	shNC	1	0	1	0	0	0.0214234	0	0	0	0	-0.0296005	0	0	0	0	0	0.00731899	0	0	0	0	0	-0.000955265	0	0	0	0	0	0	0.133794	0	0.00422864	0.00689064	0	0	0	0	0	0	0	0	0.00314048	0	0	0	0	0
493	CTAGACAGTCCTACAA.1_1	shNC	0	1	0	0	1	0	0	0	-0.0954709	0	0	0	0	0	0	0	0.00465571	0	0	-0.0380197	0	0	0	0.215057	0	0	0	0	0	0.123548	0	0.00556779	0.00624997	0	0	-0.112312	0	0	0	0	0	0.00453053	0	0	0	0	0
494	CTAGACATCCGGCAAC.1_1	shNC	0	0	0	0	0	0	0	0	0	0	0	0	0	0	0	0	0	0	0	0	0	0	0	0	0	0	0	0	0	0.0967743	0	0	0	0.0147388	0	-0.087973	0	0	0	-2.62724e-05	-0.00161575	0.00190475	0	0	0	0	0
495	CTATCTAGTCTGTGTA.1_1	shNC	0	0	0	0	0	0	0	0	0	0	0	0	0	0	0	0	0	0	0	0	0	0	0	0	0	0	0	0	0	0.183517	0	0.00827035	0	0	0	-0.166827	0	0	0	0	0	0	0	0.0163165	0	0	0
498	CTCACTGGTCGAAGCA.1_1	shNC	1	0	1	0	1	0	0	0	0	0	-0.0449738	0	0	0	0	0	0	0	0	-0.0526374	0	0	0	0.254307	0	0	0	0	0	0.11783	0	0.00361974	0	0	0	-0.107114	0	0	0	-3.19887e-05	0	0.00280602	0	0	0	0	0
499	CTCAGAAGTTTCGTAG.1_1	shNC	0	1	0	0	1	0.0181834	0.0994034	0	-0.15894	0	0	0	0	0	0	0	0	0	0	-0.0632953	0	0	0	0.204945	0	0	0	0	0	0.0796416	0	0.0063853	0	0	0.00384857	0	0	0.143035	0	0	-0.0013297	0.00156754	0	0	0	0	0
500	CTCAGAATCGCAGTGC.1_1	shNC	0	1	1	0	1	0.0158933	0	0.0137945	-0.0348298	0	-0.0358133	0	0	0	0	-0.00287438	0.0016985	0	0.0117735	-0.0310969	0	0	-0.000965054	0	0	0	0	0.00397963	0	0.094794	0	0.00238061	0.00611524	0	0	-0.0480209	0	0	0.00606625	-1.88981e-05	-0.00139034	0.00163902	0	0.00618914	0	0	0
501	CTCAGGGCAGACAAGC.1_1	shNC	0	1	1	0	0	0	0	0	0	0	0	0	0	0	0	0	0	0	0	0	0	0	-0.00114176	0	0	0	0	0	0	0	0	0	0.00823587	0	0	-0.101951	0	0	0	0	0	0	0	0	0	0	0
502	CTCAGGGGTGCAACAG.1_1	shNC	0	1	1	0	0	0	0	0.0365123	-0.09219	0	0	0	0	0	0	0	0.00449571	0	0	0	0	0	0	0.173665	0	0	0	0	0	0.0821834	0	0.00370367	0.00603519	0	0	0	0	0.215631	0.0137876	0	0	0	0	0	0	0	0
505	CTCATGCCACGTTCGG.1_1	shNC	0	0	0	0	0	0	0.144555	0	0	0.012918	-0.0547387	0	0	0	0	0	0	0	0	0	0	0	0	0.203088	0	0	0	0	0	0.115817	-0.0101773	0	0.00577573	0	0	0	0	0	0	0	-0.00131315	0	0	0	0	0	0
506	CTCATGCTCAGAGCAG.1_1	shNC	0	0	0	0	0	0	0.147724	0	-0.211693	0	-0.0373366	0	0	0	0	0	0	0	0	0	0	0	0	0.372217	0	0	0	0	0	0.247813	0	0	0.00869151	0	0	0	0	0	0	0	-0.00197607	0.00318134	0	0.010523	0	0	0
509	CTCCACACATAATCGC.1_1	shNC	0	0	0	0	1	0.0296802	0	0	0	0	0	0	0	0	0	0	0.00495492	0	0	-0.0404631	0	0	0	0.188033	0	0	0	0	0	0	0	0.00700939	0.00665164	0.0137951	0	0	0	0.162676	0	0	0	0	0	0	0.034623	0	0
511	CTCCACATCCGTAATG.1_1	shNC	0	0	0	0	0	0	0	0	-0.17195	0	0	0	0	0	0	0	0	0	0	0	0	0	0	0	0	0	0	0.00835389	0	0.180025	0	0.00499728	0	0	0	0	0	0	0	0	0	0.00218255	0	0	0	0	0
512	CTCCATGAGTCACTAC.1_1	shNC	0	0	0	0	0	0	0	0	0	0	0	0	0	0	0	0	0	0	0	0	0	0	0	0	0	0	0	0	0	0.137765	0	0	0	0	0	0	0	0	0.021006	0	0	0	0	0	0	0	0
513	CTCCATGCACAATCTG.1_1	shNC	1	1	1	0	0	0.0203015	0.110982	0.0188933	-0.077755	0	-0.0134152	0.0349301	0	0.0534127	0	0	0.0023263	0	0	0	0	0	-0.000432935	0.128616	0	0.0826784	0	0	0	0.0693152	-0.00502434	0.00191646	0.0050902	0.00647671	0.002055	-0.116403	0	0	0	-1.15449e-05	-0.00115729	0.00136429	0	0.00616282	0	0	-0.00505668
514	CTCCCAACATATACCG.1_1	shNC	0	0	0	0	0	0.015529	0.0848925	0	0	0.0111713	-0.0499725	0	0	0	0	0	0.00372068	0	0	0	0	0	0	0	0	0	0	0	0	0.126287	0	0	0.00927394	0	0.00496614	0	0	0.122155	0	0	0	0	0	0	0	0	0
515	CTCCCAAGTCATAACC.1_1	shNC	0	0	0	0	0	0	0	0	-0.0908886	0	0	0	0	0	0	0	0.00443225	0	0	0	0	0	0	0.234307	0	0	0	0	0	0.0810233	0	0.00365138	0.00594999	0	0	0	0	0	0	0	-0.00135277	0.0031883	0	0.0105513	0	0	0
516	CTCCCTCGTAGACAGC.1_1	shNC	0	0	0	0	1	0.0120621	0	0	0	0	-0.0166661	0	0	0	0	0	0.00573089	0	0	0	-0.000553928	0	0	0.293292	0	0	0	0	0	0.104763	0	0.00472123	0.0089132	0	0	-0.0952352	0	0	0	0	-0.00139047	0.00238893	0	0	0	-0.00123347	0
517	CTCCGATAGACAACTA.1_1	shNC	0	0	0	0	0	0	0.117475	0	-0.10558	0	0	0	0.0151906	0.118216	0	0	0	0.048523	0	0	0	0	0	0	0	0	0	0	0	0.0941202	0	0.00424161	0	0	0	-0.0855604	0	0	0	0	-0.00157144	0.00427826	0	0	0	0	0
518	CTCCTTTAGTAGCCAG.1_1	shNC	0	0	0	0	1	0.0233567	0	0	0	0	-0.0452848	0	0	0	0	0	0.00559615	0	0	-0.0456996	0	0	0	0.147972	0	0	0	0	0	0.169837	0	0.00461023	0	0	0	-0.0929961	0	0.183729	0	0	-0.00170801	0	0	0	0	0	0
519	CTCCTTTGTCTGTGCG.1_1	shNC	0	1	1	0	0	0	0	0	0	0	0	0	0	0	0	0	0	0	0	0	0	0	0	0	0	0	0	0	0	0	0	0.00727362	0.0118525	0	0	-0.146721	0	0	0	0	-0.00395075	0.00317673	0	0	0	0	0
520	CTCGAGGAGGTAACTA.1_1	shNC	0	0	0	0	0	0	0	0	-0.113521	0	-0.0319243	0	0	0	0	0	0	0	0	0	0	0	0	0	0	0	0	0	0	0.168515	0	0.00456061	0.0074316	0	0	-0.0919952	0	0	0	0	0	0	0	0	0	0	0
521	CTCGAGGTCTCAAAGC.1_1	shNC	0	1	1	0	1	0	0.158579	0	-0.142523	0	-0.0400803	0	0	0	0	0	0	0	0	0	0	0	0	0.183776	0	0	0	0	0	0	0	0.00572576	0	0	0	0	0	0	0	0	0	0.00250071	0	0	0	0	0
522	CTCTCAGAGGTGCGAT.1_1	shNC	0	1	0	0	0	0.0255917	0	0	0	0	0	0	0	0	0	0	0	0	0	0	0	0	0	0.394068	0	0	0.0413849	0	0	0	0	0	0.00823133	0	0	0	0	0.277722	0	0	0	0	0	0	0	0	0
523	CTCTGGTAGCGATGAC.1_1	shNC	0	0	0	0	1	0.0267263	0.146105	0	0	0	0	0	0	0	0	0	0	0	0	0	0	0	0	0	0	0	0	0	0	0.117058	0	0.00527534	0.00859626	0	0	0	0	0	0	0	-0.00195442	0.00463166	0	0.0104077	0	0	0
524	CTCTGGTGTGTCATGT.1_1	shNC	0	0	0	0	0	0	0	0	-0.157166	0	-0.0585038	0	0	0	0	0	0	0	0	0	0	0	0	0	0	0	0	0	0	0.140106	0	0	0	0	0	-0.127364	0	0	0	-3.80362e-05	0	0.00419859	0	0	0	0	0
525	CTGAATGAGTGTGTTC.1_1	shNC	0	0	0	0	0	0	0	0	0	0	0	0	0	0	0	0	0	0	0	0	0	0	0	0	0	0	0	0	0	0	0	0	0.0144113	0	0	0	0	0	0	0	-0.00327651	0	0	0	0	0	0
526	CTGAATGGTGCAACAG.1_1	shNC	0	0	0	0	0	0	0.14038	0.0337167	-0.126166	0	-0.0354805	0	0	0	0	0	0	0	0	0	0	0	0	0.109772	0	0.0705651	0	0.00571732	0	0.169686	0	0.00506864	0.00825944	0	0	0	0	0.201997	0	0	-0.00126708	0.00357983	0	0.00999987	0	0	0
527	CTGAATGTCTTTGATC.1_1	shNC	0	1	0	0	1	0.00549616	0.0707868	0.0251969	-0.0473232	0	-0.0133082	0	0	0.0529867	0	-0.00390543	0.00230775	0.0124105	0.00407147	0	0	0	-0.000700861	0.0820341	0	0.0223833	0	0.00317817	0	0.122179	0	0.00255587	0.003098	0	0	-0.0218833	0	0	0.00484456	-1.53968e-05	-0.00132325	0.000473807	0	0.00504245	0	0	0
529	CTGAGGCAGCTCACTA.1_1	shNC	0	0	0	0	1	0	0	0	-0.157911	0	0	0	0	0	0	0	0.00546335	0	0	0	-0.000664278	0	0	0.371526	0	0	0	0	0	0.140771	0	0.00634396	0	0	0	0	0	0	0	0	-0.00235032	0	0	0	0	0	0
530	CTGAGGCAGGTACAGC.1_1	shNC	0	0	0	0	0	0	0	0	0	0.0168807	-0.0454566	0	0	0.214035	0	0	0	0	0	0	0	0	0	0.148661	0	0	0	0	0	0.0680223	-0.00493063	0.00306548	0	0	0.00328708	0	0	0	0	0	0	0	0	0	0	0	0
531	CTGAGGCGTTAGGACG.1_1	shNC	0	1	0	0	0	0.00994948	0.0311598	0	-0.0280049	0	-0.0335002	0.00980713	0	0	0	-0.00914694	0.00136568	0	0	-0.0111525	0	0	-0.000720515	0	0	0.0232131	0	0.00188077	0	0	0	0.00263291	0	0.00380221	0.00120641	0	0	0	0	-1.18305e-05	-0.000975446	0.00139299	0	0.00221965	0	0	0
532	CTGATCCCACGTCATA.1_1	shNC	0	0	1	0	0	0	0	0	0	0	0	0	0	0	0	0	0	0.0823891	0	0	0	0	0	0	0	0	0	0	0	0	0	0	0.0117358	0	0	-0.145276	0	0	0	0	-0.00266821	0.00462355	0	0	0	0	0
533	CTGCATCAGAACTGAT.1_1	shNC	0	1	0	0	0	0	0	0	-0.0631702	0	-0.01054	0	0	0.0707301	0	0	0.00480591	0	0	0	0	0	-0.000750905	0.048328	0	0	0	0	0	0.0334114	0	0.00150571	0.00245359	0.00857659	0	-0.0303728	0	0.0600063	0	0	-0.00146682	0.00110838	0	0	0	0	0
535	CTGCATCTCACACCCT.1_1	shNC	0	0	0	0	1	0.031611	0	0	-0.20603	0	0	0	0	0	0	0	0	0	0	0	0	0	0	0.265665	0	0	0	0	0	0.183667	0	0	0.0101674	0	0	-0.125862	0	0	0	0	0	0	0	0	0	0	0
537	CTGCCATCAGGCATTT.1_1	shNC	0	0	1	0	1	0	0	0	-0.109789	0	0	0	0	0	0	0	0	0	0	-0.028643	0	0	0	0.287695	0	0	0	0	0	0.0641183	0	0.00288954	0.00470856	0	0	0	0	0.217194	0	0	0	0.00238026	0	0.00870183	0	0	0
539	CTGCCTAAGAGTCAAT.1_1	shNC	0	0	0	0	0	0	0	0	0	0	-0.0407728	0	0	0	0	0	0	0	0	0	0	0	0	0.342579	0	0	0	0	0	0.129248	0	0	0.00949143	0	0	0	0	0	0	0	0	0	0	0.0114915	0	0	0
540	CTGCCTAGTATCGAGG.1_1	shNC	1	0	0	0	1	0.00768722	0	0.0149586	0	0.00553005	-0.051349	0.0132264	0	0.110963	0	0	0.0031012	0	0	0	0	0	0	0.204169	0	0.0689982	0	0	0.0193689	0.199034	-0.00244053	0.00334414	0.00544934	0.00512786	0	0	0	0	0.00651021	-9.14057e-06	-0.000562145	0	0	0	0	0	0
541	CTGCGAGAGGACTATA.1_1	shNC	0	0	1	0	1	0	0	0	-0.129347	0	0	0	0	0	0	0	0	0	0	0	0	0	0	0.267862	0	0	0	0	0	0	0	0.00519643	0.00846767	0	0	0	0	0	0	0	0	0	0	0.010252	0	0	0
542	CTGCGAGAGTAAACAC.1_1	shNC	0	0	0	0	1	0	0	0	-0.109789	0.0160751	0	0	0	0	0	0	0.00535395	0	0	0	0	0	0	0.237932	0	0	0	0	0	0.0978723	0	0	0	0	0.00472954	0	0	0	0	0	0	0.00192636	0	0	0	0	0
546	CTGGACGAGTCACGCC.1_1	shNC	0	1	0	0	1	0.0266444	0	0	-0.0559786	0	-0.0316656	0	0	0	-0.00417265	0	0	0	0	0	0	0	0	0.218627	0	0.0464005	0	0	0	0.130053	0	0.00452366	0.00582945	0.00760019	0	0	0	0.142568	0.00573062	-1.35476e-05	-0.00132536	0	0	0.00443683	0	0	0
550	CTGTAGAAGGTACAGC.1_1	shNC	0	1	0	0	0	0	0	0	0	0	0	0	0	0	0	-0.0129292	0	0	0	-0.0441838	0	0	0	0.239747	0	0	0	0	0	0.0989068	0	0.00445732	0.00726328	0	0	0	0	0	0	0	0	0.00274887	0	0.0087938	0	0	0
552	CTGTATTGTATCAGCT.1_1	shNC	0	1	1	0	1	0	0	0	-0.228318	0	0	0	0	0	0	0	0	0	0	0	0	0	0	0.254508	0	0	0	0	0	0	0	0	0	0	0	0	0	0	0	0	0	0.00258544	0	0	0	0	0
553	CTGTATTTCTCCTGCA.1_1	shNC	0	1	0	0	0	0.00807234	0.0441291	0.0157079	0	0	-0.0186584	0	0	0.0444075	0	-0.00547548	0.00323551	0	0	0	0	0.0326349	-0.000784926	0.111522	0	0.0328749	0.013054	0	0	0.138388	0	0.00466805	0	0	0	-0.0537673	0	0	0.00406017	-1.60571e-05	-0.000987513	0.00285424	0	0	0	0	0
554	CTGTCGTGTCTTACTT.1_1	shNC	0	0	1	0	1	0	0	0	0	0	0	0	0	0	0	0	0	0	0	0	0	0	0	0.245979	0	0	0	0	0	0.125976	-0.00913142	0	0.00925112	0	0	-0.114519	0	0	0	0	0	0.00388619	0	0.0112005	0	0	0
555	CTGTGAATCGATGCTA.1_1	shNC	0	0	0	0	0	0	0	0	-0.128489	0	-0.0496482	0	0	0	0	0	0	0	0	0	0	0	0	0	0	0	0	0	0	0	0	0	0	0	0	-0.14307	0	0	0	0	0	0.00225446	0	0	0	0	0
556	CTGTGGGGTAGGAAAG.1_1	shNC	0	1	0	0	0	0	0	0	0	0	0	0	0	0	0	0	0	0	0	0	0	0	0	0.190797	0	0	0	0	0	0.131907	0	0	0	0	0	0	0	0	0	0	0	0	0	0	0	0	0
557	CTTAGGACAACTTGCA.1_1	shNC	0	1	0	0	0	0.0217404	0	0	-0.106815	0	0	0	0	0	0	0	0.00520892	0	0	0	0	0	0	0	0	0	0	0	0	0.161261	0	0	0	0	0	0	0	0.171015	0	-2.58507e-05	-0.00158982	0.00317401	0	0	0	0	0
558	CTTCAATTCATTCATC.1_1	shNC	0	0	1	0	0	0	0	0	-0.160541	0	0	0	0	0	0	0	0	0	0	-0.0455294	0	0	0	0	0	0	0.0376299	0	0	0	0	0.00644963	0.00748447	0	0	0	0	0	0.011704	-2.7669e-05	0	0.0033338	0	0	0	0	0
559	CTTCCGACAGCTGAAG.1_1	shNC	0	1	0	0	1	0	0	0	0	0	0	0	0	0	0	0	0	0	0	0	0	0	0	0.24301	0	0	0	0	0	0.0855831	0	0.00385687	0	0	0	0	0	0	0	0	0	0.00293817	0	0	0.0327137	0	0
561	CTTCGGTCAGGATTCT.1_1	shNC	0	1	1	0	1	0	0.122863	0.0216026	0	0	-0.0244996	0	0	0.0975453	0	0	0	0	0	0	0	0	0	0.21533	0	0	0	0	0	0.165179	0	0.00219128	0.00939139	0.0118281	0	0	0	0	0	-1.32005e-05	-0.000811831	0.00293007	0	0	0	0	0
562	CTTGAGAAGCACCCAC.1_1	shNC	0	0	0	0	1	0.014569	0	0	-0.0715804	0	0	0	0	0.0801468	0	0	0.00349067	0	0	0	0	0	0	0	0	0	0	0	0	0	0	0.00543073	0	0	0	0	0	0	0	0	-0.00106539	0	0	0	0.0243914	0	0
563	CTTGATTGTCTTAGTG.1_1	shNC	0	0	0	0	0	0	0	0	-0.183942	0	0	0	0	0	0	0	0	0	0	0	0	0	0	0.174248	0	0	0	0.0090754	0	0	0	0.00861416	0	0	0	-0.10951	0	0	0	0	-0.00201131	0.00322744	0	0	0	0	0
564	CTTTCAAAGCCTCGTG.1_1	shNC	1	0	0	0	0	0.0107789	0	0	0	0	-0.0354265	0	0	0	0	0	0	0	0	-0.02109	0	0	0	0.162437	0	0.0438973	0	0	0	0	-0.00342207	0.00212758	0.00556277	0.00719019	0	0	0	0	0	0	-0.00160732	0.000929214	0	0	0	0	0
568	CTTTCAATCTGTGTGA.1_1	shNC	0	0	0	0	1	0	0	0	0	0	-0.0220855	0	0	0.0540414	0	0	0.00235369	0	0	0	-0.000286181	0	0	0.186573	0	0.0400069	0	0.00324144	0	0.18371	0	0.00404317	0.00772904	0.00655296	0	-0.0815576	0	0	0	0	-0.0011689	0.000846862	0	0	0	0	0
569	CTTTCGGCAAATACAG.1_1	shNC	0	0	0	0	1	0	0.120915	0	-0.154042	0	0	0	0	0	0	0	0	0	0	0	0	0	0	0	0	0	0	0	0	0.163283	0	0	0	0	0	-0.0880664	0	0	0	0	-0.00304606	0.00434914	0	0	0	0	0
571	CTTTCGGTCACAACCA.1_1	shNC	1	1	1	0	0	0	0	0	0	0	-0.0424541	0	0	0	0	0	0	0	0	0	0	0	0	0	0	0	0	0	0	0	0	0.00606487	0	0	0	0	0	0	0	0	0	0.00264881	0	0	0	0	0
573	GAACACTAGACCTTTG.1_1	shNC	1	1	1	0	0	0.0326899	0.100846	0	-0.0906353	0	-0.0373514	0	0	0	0	0	0	0.0416545	0	0	0	0	0	0.171263	0	0	0.0298316	0	0	0.0807975	0	0.00364121	0	0	0	0	0	0	0	-2.1935e-05	0	0.00233044	0	0	0	0	0
575	GAACACTTCCCGGTAG.1_1	shNC	1	0	0	0	0	0.0105217	0	0.0329728	0	0	-0.0348359	0	0	0.155118	-0.00790387	0	0.00252094	0	0	0	0	0	0	0.15973	0	0.0690083	0	0	0	0.0460838	0	0.00334463	0.00694154	0.0113032	0	0	0	0	0	0	-0.000769419	0.000907039	0	0.00409731	0	0	0
578	GAAGCCCCAGCTGTGC.1_1	shNC	0	1	0	0	0	0	0	0	0	0	-0.0165123	0	0	0.0657438	0	-0.00284446	0.00168082	0	0	0	-0.000204367	0	-0.000841276	0.0998568	0	0	0	0.00231477	0	0.0826357	0	0.00311115	0	0	0	-0.0475831	0	0	0	0	-0.00137969	0.00162647	0	0.00273185	0	0	0
580	GAAGCCCTCTGATGGT.1_1	shNC	0	0	0	0	1	0	0	0	-0.151	0	0	0	0	0	0	0	0	0	0	-0.0601333	0	0	0	0	0	0	0	0.010141	0	0.13461	0	0	0	0	0	0	0	0	0	-3.65441e-05	-0.00224746	0.00264945	0	0	0	0	0
581	GAAGCGAAGGCACTAG.1_1	shNC	1	0	0	0	0	0.00523629	0	0.0101893	0	0	-0.0420742	0	0	0.0288058	0	-0.00504587	0.00220994	0	0	0	0	0	-0.000411279	0.0331735	0	0.021325	0	0	0	0.0403986	0	0.00103356	0.0016842	0	0	0	0	0	0	-1.47973e-05	-0.000382915	0.00150639	0	0.0020391	0	0	0
584	GAAGTAACATCGTTCC.1_1	shNC	0	1	0	0	0	0.0098794	0	0.040032	-0.101077	0	-0.0333344	0	0	0.132721	0	0	0.00384833	0.0223079	0	-0.01933	0	0	0	0.266459	0	0.0402342	0	0.00325985	0	0.13896	-0.00509928	0.00317034	0.00661696	0.0107142	0.002091	-0.0639511	0	0	0.00496907	0	-0.00117455	0.00138464	0	0.00939502	0	0	0
585	GAAGTAAGTCGCATGC.1_1	shNC	0	0	0	0	1	0	0	0	0	0	0	0	0	0	0	0	0	0	0	0	0	0	0	0	0	0	0	0	0	0.133399	0	0	0	0	0	0	0	0	0	0	-0.00222723	0	0	0	0	0	0
586	GAATCACTCGATGGAG.1_1	shNC	0	0	1	0	0	0	0	0.057565	0	0	0	0	0	0	0	0	0	0	0	0	0	0	0	0.251681	0	0	0	0	0	0	0	0	0	0	0	0	0	0	0	0	-0.00216331	0.00342471	0	0	0	0	0
589	GACAGCCCAGAGAATT.1_1	shNC	0	0	1	0	0	0.0181209	0	0	0	0	-0.0250374	0	0	0	0	0	0	0	0	0	0	0	0	0.114801	0	0	0	0	0.0456577	0	0	0.0052584	0	0	0	-0.0721495	0	0	0	0	0	0.00156214	0	0	0	0	0
590	GACAGCCCATAGGAGC.1_1	shNC	0	1	0	0	0	0.0226844	0	0	-0.111453	0	0	0	0	0	0	0	0	0	0	0	0	0	0	0.240532	0	0	0	0	0	0.140178	0	0.00631723	0	0	0	-0.0903196	0	0	0	0	-0.00165885	0	0	0	0	0	0
591	GACCAATCATACCATG.1_1	shNC	0	0	0	0	0	0	0.124321	0	0	0	-0.0314216	0	0	0	0	0	0	0	0	0	0	0	0	0	0	0	0	0	0	0.0996053	0	0	0.0122339	0	0	0	0	0.178889	0	-2.70409e-05	-0.00166302	0	0	0	0	0	0
592	GACCAATGTATAATGG.1_1	shNC	0	0	0	0	0	0	0	0	-0.151109	0	0	0	0	0	0	0	0	0	0	0	0	0	0	0.259786	0	0	0	0	0	0.0946183	0	0.00426405	0.00694835	0	0	-0.0860131	0	0	0	0	0	0.00186231	0	0	0	0	0
598	GACCCTTCATTCTGTT.1_1	shNC	0	0	0	0	1	0	0.111229	0	-0.193603	0	0	0	0	0	0	0	0.00487498	0	0	0	0	0	0	0.222344	0	0	0	0	0	0	0	0	0.00654433	0	0	0	0	0	0	-2.41935e-05	0	0.00302551	0	0.00792336	0	0	0
601	GACCGTGCATGGAAGC.1_1	shNC	1	0	0	0	1	0	0	0	0	0	0	0	0	0.12549	0	0	0.00359593	0	0	0	0	0	0	0	0	0	0	0	0	0.140816	-0.00476483	0	0.00482729	0.0100115	0.00317656	0	0	0	0.0114735	0	0	0	0	0.00584451	0	0	0
603	GACGTTAAGTCACGAG.1_1	shNC	1	1	1	0	0	0.0117188	0	0.0228035	0	0	-0.0375359	0	0	0	0	0	0.00280777	0	0	0	0	0	0	0.17211	0	0	0	0	0	0.118988	-0.00743137	0.00462026	0.0112835	0	0.00248031	-0.0466591	0	0.0921825	0.00589422	-2.20674e-05	-0.00135714	0.00201788	0	0.00456349	0	0	0
605	GACGTTAGTGTCCAAT.1_1	shNC	0	1	0	0	0	0	0	0	0	0	-0.0376583	0	0	0	0	0	0.0089039	0	0	0	0	0	0	0	0	0	0	0	0	0	0	0	0	0	0	0	0	0.292326	0	0	0	0.00234959	0	0.0106137	0	0	0
606	GACTCAAGTAGTTCCA.1_1	shNC	1	1	1	0	0	0	0.111313	0	-0.0643168	0	-0.0569603	0	0	0.112015	0	0	0.00313646	0.029559	0	0	0	0	0	0.205647	0	0.053312	0	0	0	0.0573357	-0.004156	0.00401913	0.00421048	0.00873227	0.00430967	0	0	0.160172	0.00658423	-1.55655e-05	-0.00148902	0.0011285	0	0	0	0	0
608	GACTGATAGAACTCCT.1_1	shNC	0	1	0	0	0	0	0.192173	0	-0.172715	0	0	0	0	0	0	0	0.00609916	0	0	-0.0498073	0	0	0	0.31213	0	0	0	0	0	0	0	0	0.00818771	0	0	0	0	0	0.0128037	0	-0.00186153	0.00219449	0	0.00991303	0	0	0
611	GAGAAATGTGTCTTAG.1_1	shNC	0	0	0	0	1	0	0	0	0	0	0	0	0	0	0	0	0	0	0	0	0	0	-0.000962133	0.1367	0	0	0	0	0	0	-0.00685039	0	0.00694018	0	0	0	-0.00239892	0	0	0	-0.0015779	0	0	0	0	-0.00220649	0
612	GAGACCCCAATAGTAG.1_1	shNC	0	0	1	0	1	0	0	0	-0.166138	0	0	0	0	0	0	0	0	0	0	0	0	0	0	0.252566	0	0	0	0	0	0	0	0	0	0	0	0	0	0	0	0	-0.00177481	0	0	0	0	0	0
615	GAGAGGTCATGTGTCA.1_1	shNC	0	1	1	0	0	0.0267759	0	0.0354802	0	0	0	0	0	0	0	0	0	0	0	-0.0356754	0	0	0	0.271163	0	0	0	0	0	0	0	0	0.00586459	0	0	-0.170418	0	0	0	-2.16806e-05	-0.00133335	0.00157184	0	0.00710038	0.0305262	0	0
616	GAGATGGCATTATGCG.1_1	shNC	0	1	0	0	0	0	0	0	-0.141776	0	0	0	0	0	0	0	0	0	0	0	0	0	0	0.301655	0	0	0	0	0	0	0	0.00569576	0.0111404	0	0	-0.155002	0	0.157163	0	0	0	0	0	0	0	0	0
619	GAGGCCTTCATTGCGA.1_1	shNC	0	1	0	0	0	0	0	0	-0.105288	0	0	0	0	0	0	0	0	0	0	-0.0419292	0	0	0	0.193573	0	0	0	0	0	0	0	0	0.00689265	0	0	0	0	0	0	-2.54811e-05	0	0.00184738	0	0	0	0	0
620	GAGGGATAGCGTTGTT.1_1	shNC	1	1	0	0	0	0	0	0	0	0	-0.0421418	0	0	0	0	0	0.00730772	0	0	0	-0.000622928	0	0	0.29803	0	0	0	0	0	0.133588	0	0	0	0	0	0	0	0	0	0	-0.0022304	0.00380861	0	0	0	0	0
621	GAGGGATCAGGCAATG.1_1	shNC	0	0	0	0	0	0	0	0	-0.100049	0	0	0	0	0	0	0	0	0.045981	0	0	0	0	0	0.27149	0	0	0	0	0	0.128368	0	0.005785	0.00942676	0	0	-0.0810782	0	0	0	0	0	0.0033988	0	0	0	0	0
623	GAGGGATTCGAGAGAC.1_1	shNC	0	1	1	0	1	0	0.0782257	0	0	0	0	0	0	0	0	0	0.00525376	0	0	0	0	0	0	0	0	0	0	0	0	0	0	0.00614498	0	0	0	-0.0873063	0	0	0	0	0	0.00296107	0	0.00557235	0	0	0
624	GAGGGTAAGAGCTGAC.1_1	shNC	0	0	0	0	0	0	0	0	0	0	-0.0336664	0	0	0	0	0	0	0	0	-0.0476748	0	0	0	0	0	0	0	0	0	0	0	0	0.0109112	0	0	0	0	0.19167	0	0	-0.00178183	0.00292444	0	0	0	0	0
625	GAGGGTACAGACCAGA.1_1	shNC	0	1	0	0	0	0	0	0	0	0	0	0	0	0	0	0	0	0	0	0	0	0	0	0.194754	0	0	0	0	0	0	0	0	0	0	0	0	0	0	0	-3.65528e-05	0	0	0	0.0119711	0	0	0
627	GAGTCATCATGAGTAA.1_1	shNC	0	0	0	0	1	0.0236966	0	0	-0.116426	0	-0.0458207	0	0	0	0	0	0	0	0	0	0	0	0	0.150126	0	0	0	0	0	0.103789	0	0	0	0	0	0	0	0.186403	0	0	-0.00173287	0.00204281	0	0	0	0	0
628	GAGTCATGTGACACAG.1_1	shNC	0	1	0	0	0	0	0	0	0	0	0	0	0	0	0	0	0.00541729	0	0	0	0	0	0	0.202219	0	0	0	0	0	0.0990302	-0.00717824	0	0.0102666	0	0	-0.0900238	0	0	0	0	0	0.00194915	0	0.0124299	0	0	0
630	GAGTCTAGTAGGACCA.1_1	shNC	0	0	0	0	0	0	0	0	0	0	-0.0275998	0	0	0	0	0	0	0	0	0	0	0	0	0.182784	0	0	0	0	0	0.109464	0	0.00252526	0.00411495	0.00853415	0	0	0	0.100638	0.00643484	-1.52124e-05	0	0.0011029	0	0	0	0	0
631	GAGTCTAGTCATATGC.1_1	shNC	0	0	0	0	1	0	0	0	0	0	-0.0407544	0	0	0	0	0	0	0	0	0	0	0	0	0	0	0	0	0	0	0	0	0.00582206	0	0	0	-0.117441	0	0	0	0	0	0	0	0	0	0	0
632	GAGTGAGGTAACATGA.1_1	shNC	0	0	0	0	0	0.0157564	0	0.0187963	-0.0474587	0	-0.0279401	0.0166197	0	0.0531383	0	0	0	0	0	0	0	0	0	0.0611955	0	0.0641683	0	0.00519904	0	0.0885691	0	0.00311006	0	0.0105105	0.00333488	0	0	0	0	0	0	0.00135831	0	0.0061358	0	0	0
633	GAGTTACCACCCTATC.1_1	shNC	0	0	0	0	0	0	0	0	0	0	0	0	0	0	0	0	0	0	0	-0.0721823	0	0	0	0.23372	0	0	0	0	0	0.118309	0	0.00533168	0	0	0	0	0	0	0.0135861	0	0	0	0	0	0	0	0
634	GAGTTACTCGGACGTC.1_1	shNC	0	0	1	0	0	0	0.0531378	0	0	0	-0.0576562	0	0	0.0871442	0	-0.0108545	0.00798805	0	0.00720062	-0.0190186	-0.00028317	0	-0.000433424	0.128727	0	0	0	0	0	0.146025	0	0.00191862	0.00312643	0	0.00205732	-0.0387019	0	0	0.00796758	0	-0.00115841	0.00175164	0	0.00378524	0.0265209	0	0
638	GATAGAATCACAAGGG.1_1	shNC	1	0	0	0	1	0	0.169559	0	-0.152391	0	0	0	0	0	0	0	0	0	0	0	0	0	0	0	0	0	0	0	0	0.13585	0	0.00612219	0.00997622	0	0	0	0	0	0	-3.68806e-05	0	0.00506694	0	0.0120784	0	0	0
639	GATAGCTAGGGCAATC.1_1	shNC	0	1	0	0	0	0.0328752	0	0	-0.161522	0	0	0	0	0	0	0	0	0	0	0	0	0	0	0	0	0	0	0	0	0.189644	0	0.00648904	0	0	0	-0.130895	0	0	0.0165353	0	0	0	0	0	0	0	0
640	GATCACAAGGGTCACA.1_1	shNC	0	1	0	0	1	0.022075	0	0	0	0	-0.0305008	0	0	0.121439	0	0	0	0	0	0	0	0	0	0.139852	0	0	0	0	0	0.0966865	-0.00700836	0.00617862	0.00710023	0	0	-0.0878932	0	0	0	0	0	0.00320924	0	0	0	0	0
642	GATCCCTAGACCCGCT.1_1	shNC	0	1	1	0	0	0	0	0	0	0	0	0	0	0	0	-0.00918634	0	0	0	0	0	0	0	0.143533	0	0	0	0	0	0	0	0	0.0102835	0	0	0	0	0	0	-2.69394e-05	0	0.00475797	0	0.00882266	0	0	0
643	GATCCCTCAGTTTCAG.1_1	shNC	0	1	0	0	0	0	0	0	0	0	0	0	0	0	0	0	0	0	0	0	0	0	0	0.184059	0	0	0	0	0	0.127249	0	0	0	0	0	0	0	0	0	0	0	0.00250456	0	0	0	0	0
645	GATGAGGGTGTGCCTG.1_1	shNC	0	1	0	0	0	0	0.163312	0	0	0	0	0	0	0	0	0	0	0	0	0	0	0	0	0.253698	0	0	0	0	0	0.130845	0	0	0	0	0	-0.118945	0	0	0	0	-0.00292838	0	0	0	0	0	0
646	GATGGAGTCCTCACCA.1_1	shNC	0	1	0	0	0	0	0	0	-0.108492	0	-0.03051	0	0	0	0	0	0	0	0	0	0	0	0	0.235897	0	0	0	0.00728617	0	0	0	0	0	0	0	-0.0879198	0	0	0	0	0	0.00269916	0	0.00859899	0	0	0
647	GATGTTGCATCACAGT.1_1	shNC	1	0	1	0	0	0	0	0	-0.0918608	0	0	0	0	0	0	0	0	0.0841058	0	0	0	0.0755873	0	0	0	0	0	0	0	0.119712	0	0.00369044	0.00879113	0	0	0	0	0.147073	0	0	-0.00136724	0.00374514	0	0	0	0	0
648	GATTCGAGTTCTCTAT.1_1	shNC	0	0	0	0	1	0	0	0	-0.129521	0	-0.0584754	0	0	0	0	0	0	0	0	0	0	0	0	0.268121	0	0	0	0	0	0.115462	0	0	0	0	0	0	0	0	0	0	0	0	0	0	0	0	0
651	GATTCGATCTTCTCAA.1_1	shNC	0	0	1	0	1	0	0	0	-0.028631	0	-0.01402	0	0	0.0320574	0	-0.00996732	0.00393686	0	0	-0.0114018	0	0	-0.000452453	0.0642846	0	0	0	0	0	0.0594832	0	0.004517	0	0.00388721	0	-0.0404011	0	0.0458393	0	0	-0.000993136	0.00225209	0	0.00226927	0	0	0
652	GATTCTTTCCTTGACC.1_1	shNC	0	0	0	0	0	0	0.181479	0.0366665	0	0	-0.0517323	0	0	0	0	0	0.0045147	0	0	0	0	0	0	0.119376	0	0.0767387	0	0	0	0.120478	-0.00598225	0.0037193	0.00884737	0	0.00582193	0	0	0	0.0094775	-2.24054e-05	-0.00137793	0	0	0	0	0	0
654	GATTTCTGTAACAAGT.1_1	shNC	0	0	0	0	1	0	0	0.0602966	-0.202703	0	0	0	0	0	0	0	0	0	0	0	0	0	0	0	0	0	0	0	0	0	0	0	0	0	0	0	0	0	0	0	0	0	0	0	0	0	0
655	GCAACATGTTCCGCAG.1_1	shNC	0	0	1	0	1	0	0	0	-0.171748	0	0	0	0	0.139075	0	0	0	0	0	0	0	0	0	0	0	0.102957	0	0	0	0.153106	0	0.00499005	0.00813138	0	0	0	0	0	0	0	-0.00184872	0	0	0	0	0	0
656	GCAACCGGTGAGACCA.1_1	shNC	0	1	0	0	1	0	0	0	-0.13906	0	0	0	0	0	0	0	0	0	0	0	0	0	0	0.282283	0	0	0	0	0	0	0	0	0.00910355	0	0	0	0	0.222641	0	0	0	0	0	0.0149231	0	0	0
657	GCAACCGTCGCATTGA.1_1	shNC	1	0	0	0	0	0.0113092	0.0984606	0.0220065	0	0	-0.0366257	0	0	0.125374	0	0	0.00270963	0	0	0	0	0.0457208	0	0.260696	0	0	0	0	0	0.150492	-0.00359043	0.00449846	0.00579306	0.00754394	0	-0.0450283	0	0	0	0	-0.000827009	0.00155267	0	0.00701378	0	0	0
664	GCATGATAGCGGTAAC.1_1	shNC	0	0	0	0	0	0.0342214	0	0	-0.168137	0	0	0	0	0	0	0	0	0	0	0	0	0	0	0.283461	0	0	0	0	0	0	0	0	0.011007	0	0	0	0	0	0	0	-0.00250252	0	0	0	0	0	0
668	GCCAACGTCTTACACT.1_1	shNC	0	1	0	0	1	0	0	0	-0.17961	0	-0.0369057	0	0	0	0	0	0	0	0	0	0	0	0	0.270684	0	0	0	0	0	0.206864	0	0	0.00859122	0	0	0	0	0.210112	0	0	-0.00195327	0.00407156	0	0	0	0	0
669	GCCAGCATCGCATGAT.1_1	shNC	0	0	0	0	0	0	0	0	0	0	0	0	0	0	0	0	0	0	0	0	0	0	0	0.183213	0	0	0	0	0	0.126664	0	0	0	0	0	0	0	0	0.0145456	0	0	0	0	0	0	0	0
670	GCCAGGTAGCAATAAC.1_1	shNC	0	0	0	0	0	0	0	0	-0.227764	0	-0.0493747	0	0	0	0	0	0	0	0	0	0	0	0	0.226393	0	0	0	0	0	0.203042	0	0.00915026	0	0	0	-0.142282	0	0.2811	0.0179738	0	0	0	0	0	0	0	0
671	GCCAGGTCAGATACTC.1_1	shNC	0	0	0	0	0	0.00865809	0.0473312	0.0168478	-0.0425389	0	-0.0119628	0	0	0.120882	0	-0.00890969	0.0065176	0	0	0	0	0.035003	0	0	0	0	0	0	0	0.0814159	0	0.00366908	0.00278479	0.00577549	0	-0.0740115	0	0.0681065	0.00435478	-1.0295e-05	-0.000633142	0.00160246	0	0	0	0	0
673	GCCAGTGGTATTAAGG.1_1	shNC	0	0	0	0	0	0.0353638	0	0	0	0	-0.0488618	0	0	0	0	0	0	0	0	0	0	0	0	0	0	0	0	0	0	0	0	0	0	0	0	0	0	0	0	0	-0.00187524	0.00396229	0	0	0	0	0
676	GCCCAGAAGACCAACG.1_1	shNC	1	0	0	0	0	0	0.103751	0	0	0.00865785	-0.0461075	0	0	0.206959	0	0	0.00288356	0	0	0	0	0.0486557	0	0.0762463	0	0.0772912	0	0.00397116	0	0.121188	-0.00602533	0	0.00889948	0.00802819	0.00254727	0	0	0	0.00605334	0	-0.00138786	0.00238526	0	0.00468669	0	0	0
678	GCCGATGTCGATCCCT.1_1	shNC	0	1	0	0	0	0.0302253	0	0	0	0	0	0	0	0	0	0	0	0	0	0	0	0	0	0.191487	0	0	0	0	0	0.132384	0	0.005966	0	0	0	0	0	0.166346	0	0	-0.00154641	0.00182301	0	0.00823496	0	0	0
680	GCGAGAACACTGTGTA.1_1	shNC	0	0	1	0	0	0	0.161574	0	0	0	0	0	0	0	0	0	0	0	0	0	0	0	0	0.320205	0	0	0	0	0	0.129453	0	0	0	0	0	0	0	0	0	0	0	0.00342219	0	0	0	0	0
683	GCGTTTCAGCGAATGC.1_1	shNC	1	1	1	0	0	0	0.0634831	0	-0.0904874	0	-0.0160451	0.0316881	0	0	0	0	0	0	0	0	0	0	0	0.190443	0	0.0750047	0	0	0	0.143009	0	0.00229216	0	0	0.00245785	0	0	0.0913479	0.00584086	0	-0.0013468	0.00259143	0	0	0	0	0
684	GCGTTTCCAAACTCTG.1_1	shNC	0	0	0	0	1	0.0161701	0	0	-0.119193	0	0	0	0	0	0	-0.00655647	0	0.0365124	0	-0.0316383	0	0	0	0.153694	0	0	0	0	0	0.0708233	0	0.00667217	0	0	0	-0.0643822	0	0	0.0081331	0	-0.00118247	0	0	0	0	0	0
689	GCTGAATAGGTACAGC.1_1	shNC	0	0	0	0	0	0	0.0405882	0.0144476	-0.0809955	0	0	0	0	0.069083	0	-0.00509182	0.0030088	0	0	0	0	0.0300163	-0.000331062	0.0795578	0	0	0	0	0	0.0861399	0	0	0.00238806	0	0	-0.0295617	0	0	0	-1.9602e-05	-0.000542942	0.000640054	0	0.00289128	0.0124303	0	0
692	GCTGGGTTCGAAGCCC.1_1	shNC	0	1	1	0	0	0	0	0	0	0	-0.0145697	0	0	0.0933905	0	-0.0171342	0.00406748	0	0	0	0	0	-0.000470191	0.136955	0	0	0.0170523	0	0.0427741	0.0461853	0	0	0.00339165	0.00703406	0	-0.10054	0	0	0	-3.00253e-05	-0.00124144	0	0	0.00410634	0	0	0
694	GCTTTCGTCTCTCAAT.1_1	shNC	0	0	0	0	0	0	0.127208	0	0	0	0	0	0	0	0	0	0.00557531	0	0	0	0	0	0	0.20701	0	0	0	0	0	0	0	0	0	0	0	-0.0926497	0	0	0	0	0	0	0	0.0090616	0	0	0
696	GGAAGTGGTGGATGAC.1_1	shNC	0	0	0	0	0	0	0	0	0	0	-0.0365569	0	0	0	0	0	0	0.0597432	0	0	0	0	0	0	0	0	0	0	0	0.115884	0	0	0.0116676	0	0	-0.144432	0	0	0	-3.14603e-05	-0.00265271	0	0	0.0141262	0	0	0
697	GGAAGTGTCACACGAT.1_1	shNC	0	0	0	0	0	0	0	0	-0.121753	0	0	0	0	0.136324	0	0	0.00969665	0	0	0	0	0	0	0.306915	0	0	0	0	0	0.108538	0	0.00798831	0	0	0	-0.136937	0	0.270541	0	-2.9466e-05	0	0.00417631	0	0	0.0414881	0	0
698	GGAAGTGTCAGCGGAA.1_1	shNC	0	1	0	0	0	0.0101755	0	0	0	0	-0.038117	0.0175077	0	0	0	0	0.002438	0	0	0	0	0	0	0.104345	0	0.0670764	0	0	0	0.141418	-0.00323051	0.003251	0.00676748	0	0.00215367	-0.0405144	0	0.0800428	0	0	-0.00153863	0.00141987	0	0.00641387	0	0	0
699	GGAATGGCAGGACGAT.1_1	shNC	0	0	0	0	0	0	0	0	0	0	0	0	0	0	0	0	0	0	0	0	0	0	0	0.321673	0	0	0	0	0	0	0	0	0	0	0	0	0	0.234083	0	0	-0.00217612	0	0	0	0	0	0
701	GGAATGGGTCGCTCGA.1_1	shNC	0	0	0	0	0	0	0	0	-0.138154	0	0	0	0	0.154688	0	0	0.00673719	0	0	0	0	0	0	0.24149	0	0	0	0	0	0	-0.00892719	0.00555024	0.00904422	0	0	0	0	0	0	0	0	0.00382296	0	0	0	0	0
704	GGAGATGAGTAGACCG.1_1	shNC	0	1	1	0	0	0	0	0	0	0	0	0	0	0.135125	0	0	0	0	0	0	0	0	-0.00073197	0.190237	0	0	0	0	0	0	0	0.00324019	0	0	0	0	0	0	0	0	0	0.00141514	0	0	0	0	0
707	GGAGGTATCGAAGTGG.1_1	shNC	0	1	0	0	0	0	0	0	0	0	0	0	0	0	0	0	0	0	0	0	0	0	0	0.176369	0	0	0	0	0	0.121933	0	0.00549499	0.00895419	0	0	0	0	0	0	0	0	0.00325939	0	0	0	0	0
711	GGCACGTAGTCGGGAT.1_1	shNC	1	1	0	0	0	0.0188923	0	0	0	0	0	0	0	0.10393	0	0	0	0	0	0	0	0	0	0.174639	0	0	0	0	0	0.164275	0	0	0	0	0	0	0	0	0	0	0	0.00237637	0	0	0	0	0
712	GGCACGTCACTGGCCA.1_1	shNC	0	1	0	0	1	0.0206143	0	0	-0.174072	0	0	0	0	0	0	0	0	0	0	0	0	0	0	0.130598	0	0	0	0	0	0	0	0.00406894	0	0	0	-0.0820775	0	0	0	-2.45117e-05	-0.00150747	0.00452458	0	0	0	0	0
715	GGCGTCACAGGTCAAG.1_1	shNC	0	1	1	0	1	0	0	0	-0.104018	0	0	0	0	0	0	0	0	0	0	0	0	0	-0.000944015	0.256323	0	0	0	0	0	0.0927275	-0.00672139	0.00597158	0	0	0	-0.0842943	0	0.166537	0	0	0	0	0	0	0	0	0
717	GGCTGTGTCATATGGC.1_1	shNC	0	0	1	0	0	0	0	0	0	0	0	0	0	0	0	0	0	0	0	0	0	0	0	0	0	0	0	0	0	0.222082	0	0	0	0	0	0	0	0	0.0255031	0	0	0	0	0	0	0	0
719	GGCTTTCGTCCTACGG.1_1	shNC	0	1	0	0	0	0	0	0	-0.118394	0	-0.0332948	0	0	0	0	0	0.00577358	0	0	-0.0471486	0	0	0	0.152663	0	0	0	0	0	0.105543	0	0.0047564	0	0	0	0	0	0	0	0	0	0	0	0	0	0	0
721	GGGACCTCACATACTG.1_1	shNC	1	0	1	0	1	0.00873765	0.0790437	0.0281359	-0.0429298	0	-0.0305597	0.0429155	0	0.0480674	0	0	0	0	0	0	0	0	-0.00038961	0.209323	0	0.0355844	0	0	0	0.168555	0	0.00436567	0.0060213	0.00582856	0.00184935	-0.0575699	0	0.14726	0	-1.03896e-05	-0.00105735	0.00124647	0	0	0	0	0
723	GGGACTCGTTGTCCCT.1_1	shNC	0	1	0	0	0	0	0	0	-0.113104	0	-0.0447533	0	0	0	0	0	0.00551559	0	0	0	0	0	0	0	0	0	0	0	0	0	0	0	0.0074043	0	0	0	0	0	0	0	0	0.00423701	0	0	0	0	0
725	GGGATCCGTATGTCAC.1_1	shNC	1	0	1	0	0	0.038731	0	0	0	0	0	0	0	0	0	0	0.00558707	0	0	0	0	0	0	0.343014	0	0	0	0	0	0.102134	0	0.00460275	0	0	0	0	0	0	0	0	-0.00283229	0.00201024	0	0.00908072	0	0	0
726	GGGCCATAGAAACACT.1_1	shNC	0	0	0	0	1	0	0	0	-0.130598	0	0	0	0	0	0	0	0.00636871	0	0	0	0	0	0	0.168399	0	0	0	0	0	0.116423	0	0.00524668	0	0	0	0	0	0	0	0	0	0	0	0	0.044502	0	0
728	GGGCCATGTACACTCA.1_1	shNC	0	0	0	0	0	0	0	0	-0.161925	0	0	0	0	0	0	0	0	0.0616049	0	0	0	0	0	0.235627	0	0	0	0.00615563	0	0.081709	0	0.00368228	0.00600035	0	0	-0.0742779	0	0	0	0	0	0	0	0.0128341	0	0	0
731	GGGCTCAAGAGCAGCT.1_1	shNC	0	0	0	0	0	0	0	0	0	0	0	0	0	0	0	0	0.00990261	0	0	0	0	0	0	0.331038	0	0	0	0	0	0	0	0	0	0	0	-0.16456	0	0	0	0	0	0	0	0	0	0	0
734	GGGTCACAGCTAATCC.1_1	shNC	0	0	0	0	1	0	0	0	0	0	0	0	0	0	0	0	0	0	0	0	0	0	0	0.15025	0	0	0	0	0	0.145348	0	0	0	0	0	0	0	0	0.0119286	0	0	0	0	0	0	0	0
737	GGGTGTCGTAGACAGC.1_1	shNC	0	0	0	0	0	0	0.0750731	0.0267226	0	0	-0.0363936	0	0	0.0755467	0	0	0.00329032	0	0	0	0	0	0	0.228979	0	0	0	0	0	0.0601483	-0.00672766	0	0.0097382	0.0141356	0	0	0	0	0	0	-0.00192616	0	0	0.00534779	0	0	0
739	GGGTTTACAGTTGGTT.1_1	shNC	0	1	0	0	0	0	0	0.052635	0	0	0	0	0	0	0	0	0.00884909	0	0	0	0	0	0	0.273164	0	0	0	0	0	0	0	0	0	0	0	0	0	0	0	0	0	0.00410598	0	0.0105334	0	0	0
744	GGTCTGGTCGCAATTG.1_1	shNC	0	1	1	0	0	0	0	0	0	0	-0.0266219	0	0	0	0	0	0	0	0	0	0	0	0	0.0776326	0	0.0499046	0	0	0	0.181326	0	0.0047772	0.00394137	0	0	0	0	0.0963924	0	-1.45707e-05	-0.00176987	0.00166101	0	0	0.0205155	0	0
746	GGTGAAGAGATCCTAC.1_1	shNC	0	1	0	0	1	0	0	0	-0.188792	0	0	0	0	0.126883	0	0	0.0077727	0	0	0	0	0	0	0.311732	0	0	0	0	0	0.142088	0	0.00640331	0	0	0	-0.0918333	0	0	0	0	-0.00168665	0.00279663	0	0	0	0	0
747	GGTGAAGCAAGATTGA.1_1	shNC	0	1	1	0	1	0	0.133386	0	-0.119881	0	0	0	0	0	0	0	0	0	0	0	0	0	0	0.303951	0	0	0	0	0	0.106869	0	0	0.00784796	0	0	-0.0971493	0	0	0	0	0	0	0	0	0	0	0
748	GGTGAAGGTGACTGTT.1_1	shNC	0	0	0	0	0	0	0	0	-0.103396	0	0	0	0	0	0	0	0	0	0	0	0	0	0	0.133323	0	0	0	0	0	0.131861	0	0	0	0	0	0	0	0	0	0	-0.00153892	0	0	0	0	0	0
750	GGTGATTTCGTGAGAG.1_1	shNC	0	0	0	0	0	0	0.0992498	0	-0.0892007	0	0	0	0	0	0	0	0	0	0	0	0	0	0	0.204715	0	0	0	0	0	0.141529	0	0.00720941	0.00858202	0	0	0	0	0	0.00913163	-2.15878e-05	0	0	0	0	0	0	0
751	GGTGGCTAGGGACCAT.1_1	shNC	1	0	0	0	0	0	0	0	-0.0983072	0	-0.0399182	0	0	0.110072	0	0	0.00479402	0	0	0	0	0	0	0	0	0	0	0.00660219	0	0.0876367	0	0.00394942	0	0	0	0	0	0	0	0	0	0.00298906	0	0	0	0	0
752	GGTGTCGCAGAAGCGT.1_1	shNC	0	0	1	0	0	0.0154449	0	0	-0.0758838	0	0	0	0	0	0	-0.00626243	0	0	0	0	0	0	-0.000688684	0.0978482	0	0	0	0	0	0.0676471	0	0	0	0	0	0	0	0.121493	0	0	-0.00210012	0	0	0	0	0	0
754	GGTTAACAGGATACGC.1_1	shNC	0	0	0	0	1	0	0	0	0	0	0	0	0	0	0	0	0	0	0	0	0	0	0	0.123615	0	0.0794636	0	0	0	0.123966	0	0	0.0123258	0	0	0	0	0	0	0	0	0	0	0.00759834	0	0	0
757	GTAACACAGATCACCT.1_1	shNC	0	0	0	0	0	0	0	0	0	0	0	0	0	0	0	0	0	0	0	0	0	0	0	0.183373	0	0	0	0	0	0.103216	0	0	0.00930978	0	0	0	0	0	0.00785191	0	-0.00241421	0.00203154	0	0.00917695	0	-0.00159637	0
759	GTAACACTCCTCAGAA.1_1	shNC	1	1	1	0	1	0	0	0.0259622	0	0	-0.0184345	0	0	0	0	0	0.00319668	0	0	0	0	0	0	0.188087	0	0	0	0	0	0.130033	-0.00656786	0.00408339	0.00665396	0.0198042	0	0	0	0	0	0	0	0	0	0.0051956	0	0	-0.00694862
760	GTAACACTCTTAATCC.1_1	shNC	0	0	0	0	1	0	0	0	0	0	0	0	0	0	0	0	0	0	0	-0.0949764	0	0	0	0	0	0	0	0	0	0	0	0	0	0	0	0	0	0	0	0	0	0	0	0.0189029	0	0	0
765	GTAATGCGTCTTCTAT.1_1	shNC	0	0	0	0	0	0.00744232	0.0687925	0.014482	-0.0365656	0	-0.0228203	0	0	0.0409416	0	-0.00301764	0.00395723	0.016805	0.00551316	0	0	0	-0.000331851	0.079723	0	0	0.0120351	0.00415224	0	0	0	0.00248386	0.00633673	0	0	-0.0296321	0	0.129921	0	-1.4963e-05	0	0.00169838	0	0.00643172	0	0	0
766	GTAGAAAAGTCGTTAC.1_1	shNC	0	1	0	0	0	0	0	0	0	0	-0.0315306	0	0	0.082603	0	-0.00608833	0	0	0	-0.0293793	0	0	0	0.203749	0	0.0611511	0	0	0	0.177268	0	0	0.0103442	0	0	0	0	0	0	0	0	0	0	0	0	0	-0.00782019
769	GTAGAGGTCCGTAGGC.1_1	shNC	0	1	1	0	1	0	0.0756017	0	0	0.00994867	-0.0629825	0	0	0	0	0	0.00634374	0	0	0	0	0.0559099	0	0.192727	0	0.056321	0	0	0	0.169103	0	0.00272972	0.00444813	0	0	0	0	0.108786	0	-2.53447e-05	-0.00222461	0.00289774	0	0	0.0231533	0	0
771	GTAGCTAGTTCGTACA.1_1	shNC	0	1	0	0	1	0.0248993	0	0	0	0	0	0	0	0	0	0	0	0	0	0	0	0	0	0.218735	0	0	0	0	0	0.109057	0	0	0.00800863	0	0	-0.0991383	0	0	0	0	-0.00182082	0.00214649	0	0.00969622	0	0	0
773	GTATTGGCAGAAGCTG.1_1	shNC	0	0	0	0	1	0	0	0	0	0	-0.0407224	0	0	0	0	0	0	0	0	0	0	0	0	0.223583	0	0	0	0.00676543	0	0.129088	0	0.00696598	0	0	0	-0.0816362	0	0	0	0	-0.00149937	0	0	0	0	0	0
776	GTCAAACCAGAATGTA.1_1	shNC	1	0	0	0	1	0.0117683	0	0.0362415	0	0	-0.061612	0	0	0.102457	0	0	0.00281963	0	0	0	-0.000342834	0	0	0.0745558	0	0	0	0	0	0.15403	0	0.00232287	0	0	0	0	0	0.146505	0	-1.39932e-05	-0.0019924	0.00234877	0	0	0	0	0
780	GTCACGGCAAATGATG.1_1	shNC	0	0	0	0	0	0	0	0	0	0.0107639	-0.0488164	0	0	0	0	0	0	0	0	0	0	0	0	0	0	0.0609361	0	0	0	0	0	0.00449127	0.0103197	0.00998107	0.00481594	0	0	0	0.00752583	-1.77916e-05	-0.00109418	0	0	0	0	0	0
781	GTCACGGGTCCTATAG.1_1	shNC	0	0	0	0	1	0	0	0	-0.182615	0	0	0	0	0	0	0	0	0	0	0	0	0	0	0.303322	0	0	0	0.0122642	0	0.22528	0	0.00733643	0	0	0	0	0	0	0	0	0	0.00320416	0	0	0	0	0
782	GTCACGGTCACCTACC.1_1	shNC	1	0	1	0	1	0	0.0540862	0	0	0	-0.0284563	0	0	0.0884682	0	0	0.0023705	0	0	0	0	0.0399985	0	0.130478	0	0.0402926	0	0.00326459	0	0.201507	-0.00766726	0.00195287	0.00871122	0.0246624	0.00209404	-0.0393927	0	0.126502	0.00497629	0	-0.00117601	0.0023348	0	0.00626247	0	0	0
783	GTCACGGTCATCTACT.1_1	shNC	0	0	0	0	1	0	0.0968499	0.0508885	0	0	-0.0361335	0	0	0.0974608	0	0	0	0	0	0	0	0	0	0.227647	0	0	0	0	0	0.0775958	0	0.00516193	0	0	0	-0.126389	0	0.139361	0	0	-0.00129555	0.00273651	0	0.00689904	0	0	0
785	GTCATGACAAATTGGA.1_1	shNC	0	0	0	0	1	0	0	0	0	0	-0.0318987	0	0	0	0	-0.00936098	0.00437831	0	0	0	-0.000672563	0	0	0.0728896	0	0	0	0	0	0.101118	0	0.00227096	0	0	0	0	0	0.0905032	0	0	-0.000841349	0	0	0	0	0	0
786	GTCATTTCATTCGATG.1_1	shNC	0	0	0	0	0	0	0	0.0170551	0	0	-0.057636	0.032287	0	0.172782	0	0	0.00347355	0	0	0	0	0	0	0.173677	0	0.0356943	0	0.00478367	0	0.144965	0	0.00173	0.00603569	0.00584658	0.00306844	0	0	0	0	0	-0.00137225	0	0	0	0	0	0
787	GTCGAATGTATACCCA.1_1	shNC	0	0	0	0	0	0	0	0	0	0	0	0	0	0	0	0	0	0	0	0	0	0	0	0.20555	0	0	0	0	0	0.215535	0	0.00640415	0.0137776	0.0216429	0	0	0	0	0	0	-0.00313242	0	0	0	0	0	0
788	GTCGAATGTTTCGACA.1_1	shNC	0	0	0	0	0	0	0	0	-0.12962	0	0	0	0	0	0	0	0	0	0	-0.051619	0	0	0	0.229277	0	0	0	0	0	0	0	0	0	0	0	0	0	0	0	-3.13698e-05	0	0.00365045	0	0	0	0	0
789	GTCGCGATCTGCGGAC.1_1	shNC	0	0	0	0	0	0	0	0	0	0	0	0	0	0	0	0	0	0	0	0	0	0	0	0.309649	0	0	0	0	0	0	0	0	0	0	0	0	0	0.252855	0	0	-0.00235063	0.00421351	0	0	0	0	0
792	GTCTAGAAGGGTTAAT.1_1	shNC	0	1	0	0	0	0	0	0	0	0	0	0	0	0	0	0	0	0	0	0	0	0	-0.000977088	0.262259	0	0	0	0	0	0	0	0.0061416	0.00704806	0.0146172	0	0	0	0	0	-2.60557e-05	-0.00160243	0.00319218	0	0.00853324	0	0	0
793	GTCTTTAAGAGTGTGC.1_1	shNC	0	1	0	0	0	0	0	0	0	0	0	0	0	0	0	0	0	0	0	0	0	0	0	0	0	0	0	0	0	0	0	0.0073836	0	0	0	0	0	0	0	0	0	0.00445608	0	0	0	0	0
796	GTCTTTATCCAAACCA.1_1	shNC	1	1	1	0	1	0.0226649	0	0.0289783	0	0	0	0	0	0	0	0	0	0	0	0	0	0	0	0.30851	0	0.0606482	0	0	0	0.122465	0	0.0063128	0	0.00993391	0	-0.0902419	0	0	0	0	0	0	0	0	0	0	0
797	GTGACGCAGGCAGCTA.1_1	shNC	0	1	1	0	0	0	0.0489474	0	0	0	-0.0123713	0	0	0	0	0	0.00214527	0	0	0	0	0	-0.000399245	0.0935462	0	0	0	0	0	0.0392165	0	0.00376552	0	0	0	0	0	0.0704321	0	0	-0.000654761	0.00127292	0	0.00575007	0	0	0
799	GTGAGCCTCTCCTGTG.1_1	shNC	0	1	1	0	1	0	0	0	0	0.0162984	0	0	0	0	0	0	0	0	0	0	0	0	0	0.26814	0	0	0	0	0	0.0992314	-0.00719283	0	0.00728711	0	0	0	0	0	0	0	0	0.00195311	0	0	0	0	0
800	GTGAGTTGTAAGTCAA.1_1	shNC	0	0	0	0	0	0.0311683	0	0	-0.153136	0	0	0	0	0	0	0	0	0.0703788	0	0	0	0	0	0.197461	0	0	0	0	0	0	0	0	0	0	0	0	0	0	0	-3.7061e-05	-0.00227925	0	0	0.0121375	0	0	0
803	GTGCACGCATCTATCT.1_1	shNC	0	0	0	0	0	0	0	0	0	0	0	0	0	0	0	0	0	0	0	0	0	0	0	0	0	0	0	0	0	0.236824	-0.0136752	0	0	0	0	0	0	0	0	0	0	0	0	0	0	0	0
804	GTGCACGCATCTCAAG.1_1	shNC	0	0	0	0	1	0	0	0	0	0	-0.0277163	0	0	0	0	0	0	0	0	0	0	0	0	0.302344	0	0.081694	0	0	0	0.126803	0	0	0	0	0	0	0	0	0	0	0	0	0	0	0	0	0
808	GTGCGTGCAACTGATC.1_1	shNC	1	1	0	0	0	0	0	0	0	0	0	0	0	0	0	0	0	0.0617229	0	0	0	0	0	0.173175	0	0.0761525	0	0	0	0.163154	-0.00593656	0.00539547	0	0.0124734	0	0	0	0	0	0	0	0.00284595	0	0	0	0	0
809	GTGCGTGGTAGCTTTG.1_1	shNC	1	1	1	0	1	0.0152543	0	0.0296833	0	0.0109737	0	0	0	0	0	0	0.00365486	0	0	0	0	0.0616702	0	0.0966408	0	0	0	0	0	0.124645	-0.00484292	0.00301096	0.00490641	0	0.00322862	-0.0607361	0	0.119994	0	0	0	0.00308306	0	0	0	0	0
812	GTGGAAGAGAAATTGC.1_1	shNC	0	0	0	0	0	0	0	0	-0.225767	0	-0.0354183	0	0	0	0	0	0	0	0	0	0	0	0	0.262747	0	0	0	0	0	0.112275	0	0.00505976	0	0	0	0	0	0	0	0	0	0	0	0.0137671	0	0	0
813	GTGGAAGGTGAGACCA.1_1	shNC	0	0	0	0	1	0	0	0	0	0	0	0	0	0	0	0	0	0	0	0	-0.00110256	0	0	0	0	0	0	0	0	0	-0.0120157	0	0	0	0	0	0	0	0	0	0	0	0	0	0	0	0
814	GTGGAAGTCCCGAACG.1_1	shNC	0	1	1	0	0	0	0	0	0	0	-0.0451712	0	0	0.128094	0	0	0.00557892	0	0	0	0	0	0	0.147516	0	0	0	0.00768313	0	0.143191	0	0	0	0	0	0	0	0	0	0	0	0	0	0	0	0	0
818	GTGTCCTCAGTGGCTC.1_1	shNC	0	0	0	0	0	0	0	0	-0.211998	0	-0.0452309	0	0	0	0	0	0	0	0	0	0	0	0	0.27336	0	0	0	0	0	0	0	0	0	0	0	0	0	0	0	0	-0.00239389	0	0	0	0	0	0
819	GTGTCCTCATGGAACG.1_1	shNC	0	0	0	0	0	0.0126743	0	0.0246629	0	0	-0.017512	0	0	0.0697239	0	-0.0144404	0	0	0	0	-0.000218599	0	-0.000741241	0	0	0	0	0.00418208	0	0.0728096	-0.00238228	0	0	0	0	-0.0661879	0	0.0996992	0	-2.35667e-05	-0.000548728	0.00143307	0	0.00292209	0	0	0
820	GTGTCCTTCCTGTACC.1_1	shNC	0	0	0	0	1	0	0	0	0	0	0	0	0	0	0	0	0	0	0	0	0	0	0	0.306679	0	0	0	0	0	0	0	0	0	0	0	0	0	0	0	0	0	0	0	0	0	0	0
822	GTGTTCCCAATAGGAT.1_1	shNC	0	0	1	0	1	0	0	0	0	0	-0.0363125	0	0	0	0	0	0	0	0	0	-0.000765626	0	0	0.228564	0	0	0	0.00867188	0	0	0	0	0	0	0	0	0	0	0	0	0	0.00226563	0	0	0	0	0
823	GTTACAGCACCGAATT.1_1	shNC	0	1	1	0	0	0.0158402	0.0865936	0	-0.0477547	0	-0.0280732	0	0	0.0534698	0	-0.00642271	0.00232879	0	0	0	0	0	0	0	0	0	0	0.00670423	0	0.0889911	0	0.0031266	0.00509485	0	0	-0.0630687	0	0	0.00488873	-1.15573e-05	-0.000710773	0.00302243	0	0.00378501	0	0	0
825	GTTACAGTCACTCTTA.1_1	shNC	0	0	1	0	0	0	0.220319	0	-0.147933	0	0	0	0	0.165637	0	0	0.00721408	0	0	0	0	0	0	0.255326	0	0	0	0	0	0	-0.00955911	0	0.0164606	0	0	-0.119883	0	0	0	0	0	0.00259564	0	0	0	0	0
827	GTTAGACCACGTAGAG.1_1	shNC	0	0	0	0	0	0.00875952	0	0.0170451	-0.0711934	0	0	0	0	0.0797135	0	-0.0146087	0.00530875	0	0.00648892	0	-0.000546423	0	-0.000390585	0.0918002	0	0	0	0.00289033	0	0.109429	0	0.00286014	0.00603295	0	0	-0.0348766	0	0.0689044	0.0044058	0	-0.00105963	0	0	0.00862837	0	0	0
828	GTTATGGCACTGGACC.1_1	shNC	1	1	0	0	0	0.02461	0	0	-0.120914	0	-0.0227341	0	0	0	0	0	0.00394228	0	0	0	0	0	0	0.295032	0	0	0	0.00542919	0	0.186764	-0.00522376	0.00485763	0	0	0	-0.119762	0	0	0	0	0	0.0040146	0	0.0117133	0	0	0
829	GTTATGGTCATAAGGA.1_1	shNC	0	0	0	0	0	0	0	0	0	0	0	0	0	0	0	0	0	0	0	-0.0532528	0	0	0	0	0	0	0	0	0	0	0	0	0	0	0	0	0	0	0	0	0	0	0	0	0	0	0
830	GTTCATTAGGTTTGAA.1_1	shNC	0	0	1	0	0	0	0	0	-0.0676412	0	0	0	0	0.0757362	0	-0.016438	0.00329857	0	0	0	-0.000401067	0	-0.000613878	0.134531	0	0	0.0222633	0	0.0346882	0.132834	0	0.00419147	0.00442811	0.00918362	0	-0.105069	0	0	0	-1.63701e-05	0	0	0	0.0053612	0	0	0
831	GTTCCGTCAATAAGGT.1_1	shNC	0	0	0	0	1	0.0154677	0	0.0133312	-0.0336598	0	-0.0375059	0	0	0.0376881	0	-0.00277783	0.00164145	0	0	0	-0.00019958	0	-0.000942529	0	0	0	0	0	0	0.102433	-0.00217502	0.00231042	0.00376487	0	0	-0.046605	0	0.0920757	0	-2.20458e-05	0	0.000590595	0	0.0045582	0	0	0
832	GTTCGCTAGCGACAGT.1_1	shNC	1	0	0	0	1	0	0.0954416	0	-0.085778	0	-0.0638285	0	0	0.0960436	0	0	0	0	0	0	0	0	0	0.110606	0	0.0711011	0	0	0	0.13756	0	0.00510024	0.00831093	0	0.00369518	-0.069513	0	0	0	0	0	0	0	0.00679872	0	0	0
833	GTTCGCTAGGCTTAAA.1_1	shNC	0	1	0	0	1	0	0	0	-0.194701	0	0	0	0	0	0	0	0	0	0	0	0	0	0	0.251057	0	0	0	0	0	0.154666	0	0.00582141	0.00660023	0	0	-0.0817037	0	0	0	0	0	0.00341622	0	0	0	0	0
835	GTTCTATGTAGAATGT.1_1	shNC	0	1	0	0	0	0	0.218343	0	-0.146307	0	0	0	0	0	0	0	0	0	0	-0.0582644	0	0	0	0.253036	0	0	0	0	0	0	0	0	0	0	0	0	0	0	0	0	-0.00217761	0.0025671	0	0	0	0	0
836	GTTGCTCAGGTCGCCT.1_1	shNC	0	1	0	0	1	0	0	0	-0.134099	0	0	0	0	0	0	0	0	0	0	0	0	0	0	0	0	0	0	0	0	0.162953	0	0.00538733	0	0	0	-0.108671	0	0	0.0137279	0	0	0.00374132	0	0	0	0	0
838	GTTTACTCAATTTCTC.1_1	shNC	0	1	1	0	1	0.029998	0	0.0583731	0	0	0	0	0	0	0	0	0	0	0	0	0	0	0	0.190047	0	0	0	0	0	0	0	0	0	0	0	-0.119439	0	0	0	-3.56695e-05	-0.00219367	0	0	0.015647	0.0502226	0	0
840	TAACTTCAGCTAGAAT.1_1	shNC	0	0	0	0	0	0	0	0	-0.0894879	0	0	0	0	0	0	0	0	0	0	0	0	0	0	0.253225	0	0	0	0	0	0.0797746	0	0.00639305	0.00585829	0	0	-0.0725194	0	0	0	0	0	0	0	0	0	0	0
841	TAACTTCTCACACCGG.1_1	shNC	0	0	0	0	1	0	0.117235	0	0	0	0	0	0	0	0	0	0	0	0	0	0	0	0	0.193688	0	0	0	0	0	0	0	0.00423295	0.00983342	0	0	-0.121727	0	0	0.0107864	0	0	0	0	0	0	0	0
842	TAAGCACAGTGTTGTC.1_1	shNC	0	0	0	0	0	0	0	0	0	0	0	0	0	0	0	-0.0145429	0	0	0	0	0	0	0	0.227227	0	0	0	0	0	0	0	0	0	0	0	0	0	0	0	0	-0.00340024	0	0	0	0	0	0
848	TAATCTCGTTTCGCTC.1_1	shNC	0	0	0	0	1	0	0	0	0	0	0	0	0	0.149726	0	0	0	0	0	-0.0532528	0	0	0	0.172428	0	0	0	0	0	0	0	0.00537221	0	0	0	0	0	0.214095	0	0	-0.00199031	0	0	0	0	0	0
849	TAATTCCTCCCAGGAC.1_1	shNC	0	0	0	0	1	0.0129498	0	0	-0.0636247	0.00931581	-0.0278809	0	0	0	0	0	0.00310271	0	0	0	0	0	0	0.159768	0	0	0	0	0	0.0883816	0	0.00255607	0	0	0.00615726	0	0	0	0	0	0	0	0	0	0	0	0
851	TACACCCGTCGCTTGG.1_1	shNC	0	1	1	0	0	0.0174845	0	0	0	0	-0.0241581	0	0	0	0	-0.00708943	0.00418921	0	0	-0.0506182	0	0	0	0.199188	0	0.0712062	0	0	0	0.0765804	0	0.00345116	0	0	0	0	0	0	0	0	-0.00127859	0.00307054	0	0.0100744	0	0	0
855	TACCCACGTCGAAACG.1_1	shNC	0	1	0	0	0	0	0	0	0	0	-0.0564371	0	0	0	0	0	0	0	0	0	0	0	0	0	0	0	0	0	0	0	0	0	0	0	0	-0.121872	0	0	0	0	0	0	0	0	0	0	0
856	TACCCGTGTGTATCCA.1_1	shNC	0	0	1	0	0	0	0	0	0	0.0104797	-0.0435378	0	0	0	0	0	0	0	0	0	0	0	0	0.220083	0	0	0	0	0	0.164012	-0.00873438	0	0.00468556	0	0.00308329	-0.0580022	0	0.114593	0	0	-0.00106529	0.00237169	0	0	0	0	0
857	TACCCGTTCCTATTGT.1_1	shNC	1	1	0	0	0	0	0	0	-0.120386	0	-0.0470852	0	0	0	0	-0.00505135	0.00298489	0	0	0	0	0	0	0.0789255	0	0	0	0	0	0.0855664	0	0.00483642	0	0	0	-0.0777845	0	0.0979976	0	-1.48133e-05	0	0.00211229	0	0	0	0	0
858	TACCGAACACTTCCTG.1_1	shNC	1	1	0	0	0	0	0.105479	0	0	0	0	0	0	0	0	0	0.00671957	0	0	0	0	0	0	0.240976	0	0	0	0	0	0.14792	0	0	0	0	0	-0.0768235	0	0	0	0	-0.00141097	0.00241771	0	0.00751372	0.0323033	0	0
859	TACCGAAGTAGGAGGG.1_1	shNC	0	0	1	0	1	0	0	0	0	0	-0.0296307	0	0	0	0	0	0.00513819	0	0	0	0	0.086699	0	0	0	0	0	0	0	0.0939282	0	0.00423295	0	0	0	0	0	0	0	0	-0.00223569	0.00184873	0	0.0119055	0	0	0
860	TACCGGGAGAGCACTG.1_1	shNC	0	0	0	0	1	0	0	0	0	0.0115581	-0.0333429	0	0	0.0883862	0	0	0	0	0	0	0	0	0	0.213233	0	0.0982782	0	0	0	0.129472	-0.00510085	0	0	0.0107175	0.00340057	0	0	0	0.00808113	-1.91043e-05	-0.00117492	0	0	0	0	0	0
861	TACCGGGAGTTTCGGT.1_1	shNC	0	0	0	0	1	0.0207584	0	0	-0.174951	0	-0.0286817	0	0	0	0	-0.00841691	0.00497363	0	0	0	0	0	0	0.274765	0	0	0	0	0	0	0	0.00409738	0	0	0	-0.0826511	0	0	0	0	0	0.00178952	0	0	0	0	0
870	TACGGGCTCCCACAGG.1_1	shNC	0	0	0	0	0	0	0.0295348	0	0	0	-0.0441418	0	0	0.0297211	0	-0.00219062	0.00129446	0	0	-0.0105708	-0.00015739	0	-0.00111275	0.0342276	0	0.0220025	0	0	0	0.0415451	0	0.0010664	0.00305089	0	0	0	0	0.0424986	0	0	0	0.000465747	0	0.00210389	0	0	0
871	TACGGTACAAGCTGTT.1_1	shNC	0	1	0	0	1	0	0	0	0	0	0	0	0	0	0	0	0	0	0	0	0	0	0	0	0	0.114708	0	0	0	0.167182	0	0	0.0122771	0	0	-0.112146	0	0.221563	0	0	-0.00205972	0.00382762	0	0	0	0	0
872	TACGGTAGTAAGAACT.1_1	shNC	0	1	1	0	0	0	0	0	0	0	-0.0315829	0	0	0.0827688	0	0	0.00360487	0	0	0	0	0	0	0.144814	0	0	0	0	0	0.141052	0	0.00635662	0.00483929	0	0	-0.0599052	0	0.118352	0	0	0	0.00367029	0	0	0	0	0
873	TACGTCCTCTCACCCA.1_1	shNC	0	1	1	0	0	0	0.156236	0	-0.168728	0	-0.0272818	0.0339731	0	0.108623	0	0	0.00473088	0	0	0	0	0	0	0	0	0.0804133	0	0	0	0.150414	0	0	0.0110457	0.0190644	0.00417914	-0.136735	0	0	0	-2.34783e-05	-0.00251133	0.00170218	0	0.0111294	0	0	0
874	TACTGCCGTCCACGCA.1_1	shNC	0	1	0	0	0	0	0	0	0	0	0	0	0	0	0	0	0	0	0	0	0	0	0	0.21384	0	0	0	0	0	0	0	0	0	0	0	0	0	0.265514	0	0	0	0	0	0	0	0	0
876	TAGACCAAGTCCGCGT.1_1	shNC	0	1	1	0	0	0	0	0	-0.0956684	0	-0.0390404	0	0	0	0	0	0	0	0	0	0	0	0	0.242445	0	0	0.0314881	0	0	0.0852842	0	0.0055772	0.00908814	0	0	0	0	0	0	0	0	0.00243582	0	0	0	0	0
877	TAGACCATCCGTGTAA.1_1	shNC	0	0	0	0	1	0.0465469	0	0	0	0	0	0	0	0.127887	0	0	0.0055699	0	0	0	0	0	0	0.272772	0	0	0	0	0	0.10182	-0.00738046	0	0	0	0	-0.129997	0	0	0	0	-0.00169999	0.00281463	0	0.00905281	0	0	0
878	TAGATCGGTTTACGTG.1_1	shNC	0	0	0	0	0	0	0	0	0	0	0	0	0	0	0	0	0	0	0	0	0	0	0	0	0	0	0	0	0	0	0	0	0	0	0	0	0	0	0	0	0	0	0	0.0148439	0	0	0
879	TAGCACAGTGCAATAA.1_1	shNC	0	1	1	0	1	0	0	0	0	0	-0.0228066	0	0	0	0	0	0.00591192	0	0	0	0	0	0	0.217127	0	0	0	0	0	0.0722961	0	0	0.00530911	0	0.00522244	0	0	0	0	0	0	0.00323979	0	0	0.0276348	0	0
881	TAGGTACGTACGGGAT.1_1	shNC	0	0	1	0	0	0.0369873	0	0	0	0	0	0	0	0	0	0	0	0	0	-0.0530193	0	0	0	0.343208	0	0	0.0438203	0	0	0.118685	0	0	0	0	0	-0.107891	0	0	0	0	0	0.00318856	0	0	0	0	0
886	TATATCCAGGGCTAAC.1_1	shNC	0	0	0	0	1	0.0338856	0	0	-0.166487	0	0	0	0	0	0	0	0	0	0	0	0	0	0	0	0	0	0	0.014645	0	0.148416	0	0	0	0	0	-0.134918	0	0	0.0170435	0	0	0.00292117	0	0.0131956	0	0	0
889	TATCCTACAAGTCGTT.1_1	shNC	0	0	0	0	0	0	0	0	0	0	0	0	0	0	0	0	0	0	0	-0.0607166	0	0	0	0.196596	0	0	0	0	0	0	0	0	0	0	0	0	0	0	0	0	-0.00302059	0	0	0	0	0	0
890	TATCCTACAGAGTCAG.1_1	shNC	1	1	0	0	0	0.0177041	0.0967829	0	0	0	-0.036113	0	0	0	0	0	0	0	0	0	0	0	0	0.165585	0	0	0	0	0	0.0775421	0	0	0.00569435	0	0	0	0	0	0.00890466	0	-0.00129465	0.00309624	0	0	0	0	0
891	TATCGCCCAGGACTTT.1_1	shNC	1	0	1	0	0	0	0	0	0	0	-0.0193642	0	0	0	0	0	0.0033579	0	0	0	0	0	0	0.281273	0	0	0	0	0	0.0943962	0	0.00276631	0	0	0	-0.0558011	0	0	0.00704909	0	-0.00102487	0.00120818	0	0	0	0	0
892	TCAAGACTCCATGCAA.1_1	shNC	0	1	0	0	0	0	0	0	-0.131568	0	-0.0369996	0	0	0	0	0	0	0	0	-0.0523949	0	0	0	0.232078	0	0	0	0	0	0.117288	0	0.00528566	0.00861308	0	0	0	0	0	0.0134689	0	0	0.00369007	0	0.010428	0	0	0
900	TCACAAGGTCGACGCT.1_1	shNC	0	0	0	0	1	0.0412596	0	0	-0.125048	0	0	0	0	0	0	0	0	0	0	0	0	0	0	0.161243	0	0	0	0	0	0.111475	0	0	0	0	0	0	0	0	0	0	0	0.00219409	0	0.00991122	0	0	0
903	TCAGCAAGTAAGATAC.1_1	shNC	0	0	1	0	0	0	0	0	-0.215952	0	0	0	0	0	0	0	0.00802277	0	0	0	0	0	0	0.278459	0	0	0	0	0.0843685	0.192512	0	0	0	0	0	-0.133321	0	0	0	0	-0.00244864	0.00288661	0	0.0130395	0	0	0
905	TCAGCCTGTCTCGGGT.1_1	shNC	0	0	0	0	0	0	0	0	-0.176737	0	-0.0497018	0	0	0	0	0	0	0	0	-0.0512364	0	0	0	0.165899	0	0	0	0	0	0.157553	0	0.00516879	0	0	0	0	0	0.282963	0.0180928	0	0	0	0	0	0	0	0
909	TCAGTGAGTTGAGGAC.1_1	shNC	0	1	0	0	0	0.0393439	0	0	0	0	0	0	0	0	0	0	0	0	0	-0.057198	0	0	0	0	0	0	0	0	0.073657	0.199787	0	0.0057702	0.00940265	0	0	0	0	0	0	0	0	0	0	0	0	0	0
912	TCATACTCACATACTG.1_1	shNC	1	1	1	0	0	0.0162239	0.0886915	0	0	0	0	0	0	0	0	0	0	0	0	-0.0317438	0	0	0	0.235527	0	0	0	0	0	0.130397	0	0	0.00521828	0	0	-0.118538	0	0	0	0	-0.00177892	0.00256652	0	0.00631789	0	0	0
913	TCATACTTCTGAGGCC.1_1	shNC	0	0	0	0	1	0	0	0	-0.15991	0	0	0	0	0	0	0	0	0	0	0	0	0	0	0.312476	0	0	0	0	0	0.236235	0	0.00973555	0	0	0	-0.129588	0	0	0	-3.87004e-05	0	0	0	0	0	0	0
916	TCATCCGCAGCTACTA.1_1	shNC	1	1	0	0	0	0.0179276	0	0	0	0	-0.0247704	0	0	0.0986233	0	0	0.00632708	0	0	0	0	0	0	0	0	0	0	0	0	0.0785213	0	0.00353863	0.00576626	0	0	0	0	0.141023	0	0	-0.00193109	0.00227649	0	0.00698133	0	0	0
917	TCATCCGGTATCTCGA.1_1	shNC	0	0	0	0	1	0	0	0.0470503	-0.118797	0	0	0	0	0	0	0	0.00579324	0	0	0	0	0	0	0.153183	0	0	0	0	0	0.105903	0	0.00477259	0	0	0	0	0	0	0	0	0	0	0	0.0094158	0	0	0
918	TCATGCCAGTAACAGT.1_1	shNC	0	1	0	0	0	0	0	0	-0.125876	0	0	0	0	0	0	0	0.00613843	0	0	0	0	0	0	0.262642	0	0	0	0	0	0.181577	0	0	0.00824042	0	0	0	0	0	0	0	0	0.00304632	0	0	0	0	0
924	TCATTGTGTTTAGTCG.1_1	shNC	1	1	1	0	0	0.0316824	0	0	-0.110077	0	-0.0628468	0	0	0	0	0	0	0	0	0	0	0	0	0.288165	0	0	0	0	0.0564503	0.0981286	0	0.0062536	0.00720613	0	0	-0.126146	0	0	0	0	0	0.00273124	0	0.00872462	0	0	0
927	TCCATCGCACCGGTCA.1_1	shNC	0	0	0	0	1	0	0	0	-0.134723	0	-0.0664115	0	0	0	0	0	0.00656986	0	0	0	0	0	0	0.173718	0	0	0	0	0	0.1201	0	0	0	0	0	0	0	0	0	0	-0.00200519	0	0	0	0	0	0
929	TCCATGCCACTTTATC.1_1	shNC	0	1	0	0	0	0	0	0	0	0	-0.0335166	0	0	0	0	0	0	0	0	0	0	0	0	0.15368	0	0	0	0	0	0.106247	0	0.00786608	0	0	0	0	0	0	0	0	0	0.00381831	0	0	0	0	0
930	TCCATGCTCGATGGAG.1_1	shNC	0	0	0	0	1	0	0	0	0	0	0	0	0	0	0	0	0	0	0	0	0	0	0	0.198043	0	0	0	0	0	0	0	0	0	0	0	0	0	0	0	0	-0.00228597	0	0	0	0	0	0
933	TCCCAGTAGGTAACTA.1_1	shNC	0	0	0	0	1	0	0	0	0	0	-0.0490756	0	0	0	0	0	0	0	0	0	0	0	0	0.292231	0	0	0	0	0	0.155568	0	0	0	0	0	-0.14142	0	0	0	0	-0.00259737	0	0	0	0	0	0
935	TCCCAGTTCGTTCTAT.1_1	shNC	0	0	1	0	1	0.0281663	0	0	-0.138387	0	0	0	0	0	0	0	0	0	0	0	0	0	0	0.241821	0	0	0	0	0	0	0	0.00753421	0	0	0	-0.112146	0	0	0	0	-0.00205972	0	0	0.0109685	0	0	0
936	TCCGAAAGTGTTCGTA.1_1	shNC	1	0	0	0	0	0	0	0	0	0.0157708	-0.062	0.0377195	0	0.171232	0	0	0	0	0	0	0	0	0	0	0	0	0	0	0	0.0960193	0	0	0	0	0.00464	0	0	0	0	0	0	0	0	0.00853708	0	0	0
941	TCCTCGACAAATGCTC.1_1	shNC	0	1	0	0	1	0.0164678	0.0900247	0	-0.0809097	0	0	0	0	0	0	0	0	0	0	0	0	0	0	0.295164	0	0	0	0	0	0.107865	0	0	0.00792111	0	0	-0.119836	0	0.12954	0.0123868	0	-0.00120425	0.00141964	0	0.00959026	0.0275704	0	0
945	TCCTTTCTCGCTAATG.1_1	shNC	0	1	0	0	1	0.0237143	0.159116	0	-0.0772857	0	-0.0402159	0	0	0	0	0	0.0037689	0	0	0	0	0	0	0.298581	0	0	0	0.00782488	0	0	0	0.0031049	0.00505949	0	0	0	0	0.186542	0	-1.87042e-05	-0.00212846	0.0028606	0	0.00923477	0	0	0
946	TCGAAGTAGGTTACAA.1_1	shNC	0	0	0	0	0	0	0	0	-0.156429	0	0	0	0	0	0	0	0	0	0	-0.0441015	0	0	-0.00100505	0.142797	0	0	0	0	0	0.13945	0	0.00444901	0.00724974	0	0	0	0	0	0	-2.68013e-05	-0.00164828	0.00194309	0	0	0	0	0
947	TCGACGGAGTTGGAGC.1_1	shNC	0	0	0	0	0	0	0	0	0	0	0	0	0	0	0	0	0	0	0	0	0	0	0	0	0	0	0	0	0	0.232726	0	0	0	0	0	0	0	0	0	0	0	0.00363585	0	0	0	0	0
950	TCGCACTAGTGCGCTC.1_1	shNC	0	1	0	0	0	0	0	0	-0.167283	0	-0.0470432	0	0	0	0	0	0	0	0	0	0	0	0	0.215702	0	0	0	0	0	0.149125	0	0.00879485	0	0	0.00720627	-0.135563	0	0.267826	0.022411	0	0	0	0	0.0132587	0	0	0
952	TCGCACTGTCGTTCAA.1_1	shNC	0	0	0	0	1	0	0	0	-0.181052	0	-0.0300742	0	0	0	0	0	0	0	0	-0.0605474	0	0	0	0.261091	0	0	0	0	0	0.0953342	0	0.00727362	0.00700092	0	0	-0.123211	0	0	0	0	0	0.00266769	0	0	0.036441	0	0
953	TCGCACTGTCTGCAAT.1_1	shNC	0	0	0	0	0	0.0249125	0.13619	0	0	0	0	0	0	0	0	0	0.00596894	0	0	-0.0487438	0	0	0	0	0	0	0	0	0	0.177939	0	0	0.00801289	0	0	-0.099191	0	0	0	0	-0.00182178	0.00419019	0	0	0	0	0
955	TCGCAGGGTCGCTTGG.1_1	shNC	0	1	1	0	0	0	0	0	0	0	-0.0473911	0	0	0	0	0	0	0	0	0	0	0	0	0.28399	0	0	0	0	0	0	-0.0108894	0	0.0110321	0	0	0	0	0	0	0	0	0.00295685	0	0	0	0	0
956	TCGCTTGTCCTACCAC.1_1	shNC	0	0	0	0	0	0	0.14688	0	0	0	0	0	0	0	0	0	0	0	0	0	0	0	0	0.232709	0	0	0	0	0	0.160882	0	0	0	0	0	0	0	0.21135	0.0135139	0	0	0	0	0	0	0	0
958	TCGGATATCAGACCTA.1_1	shNC	0	1	0	0	0	0	0	0.0461341	0	0	0	0	0	0	0	0	0	0	0	0	0	0	0	0.1502	0	0	0	0	0	0.103841	0	0.00467966	0.0076256	0	0	0	0	0	0	0	0	0	0	0	0	0	0
959	TCGGGCACACAGAGCA.1_1	shNC	0	1	0	0	1	0	0.0325934	0	-0.0292933	0	-0.0264962	0	0	0.032799	0	-0.00241748	0.0055645	0.0134627	0	0	-0.00017369	0	-0.000745409	0.105908	0	0	0	0.0019673	0	0.0453544	0	0.00204394	0.00444993	0	0	-0.0237388	0	0.0468998	0	-2.28022e-05	0	0	0	0.00403246	0.00998184	0	0
960	TCGGGTGAGGCCTAGA.1_1	shNC	0	0	0	0	1	0	0	0	0	0	-0.0259556	0	0	0.0798489	0	-0.0101437	0	0	0	0	-0.000255686	0.035483	-0.000647213	0.0556039	0	0.0357439	0	0.00478938	0	0.0822784	0	0.00370794	0	0	0	-0.0577918	0	0.114177	0	-1.7259e-05	-0.00162257	0.00161943	0	0	0	0	0
962	TCGGTCTTCTCCTGTG.1_1	shNC	1	0	0	0	0	0	0	0.0292381	0	0.0108091	-0.031548	0.0258525	0	0.125608	-0.00550281	0	0.00360005	0	0	0	0	0	0	0	0	0.11462	0	0.00495789	0	0	0	0	0.00905245	0	0.00483266	0	0	0	0	0	-0.00109877	0	0	0.00889155	0	0	0
963	TCGTAGAGTTGAGGAC.1_1	shNC	0	0	0	0	1	0	0.153236	0	0	0	0	0	0	0	0	0	0	0	0	0	0	0	0	0.309028	0	0	0	0	0	0	0	0.00750469	0.00901585	0	0	-0.111607	0	0	0	0	0	0	0	0	0	0	0
965	TCGTCCATCGGCCTTT.1_1	shNC	0	0	1	0	0	0	0	0	-0.167661	0	0	0	0	0	0	0	0	0	0	-0.0667681	0	0	0	0	0	0	0	0	0	0.149462	0	0	0	0	0	0	0	0	0	-4.05762e-05	-0.00249543	0	0	0	0.0571312	0	0
966	TCGTGCTAGCCAGAGT.1_1	shNC	0	0	0	0	0	0	0	0.065901	0	0	-0.0467931	0	0	0	0	0	0	0.0764718	0	0	0	0	0	0	0	0	0	0	0	0	0	0	0	0	0	0	0	0	0	0	0	0	0	0	0	0	0
967	TCGTGGGGTCTCTCCA.1_1	shNC	0	0	0	0	0	0	0	0	0	0	0	0	0	0	0	0	0	0	0	0	0	0	0	0.168171	0	0	0	0	0	0.159307	-0.0115474	0	0	0	0	0	0	0	0	-3.15637e-05	-0.00194117	0	0	0	0	0	0
970	TCTATACCATAACCCA.1_1	shNC	1	0	0	0	0	0.0281013	0	0	0	0	0	0	0.0198647	0	0	0	0	0	0	0	0	0	0	0	0	0	0	0	0	0.166868	0	0	0	0	0	0	0	0	0	0	0	0.00242253	0	0	0	0	0
971	TCTATCAAGCCATGCC.1_1	shNC	0	1	1	0	1	0	0	0	-0.0895092	0	-0.0369707	0	0	0	0	0	0	0	0	0	0	0	0	0.205229	0	0	0	0	0	0.117196	0	0.00359597	0.00585969	0	0	-0.0725367	0	0.210482	0	0	0	0.00407635	0	0	0	0	0
973	TCTCACGAGTTGTACC.1_1	shNC	0	1	0	0	0	0	0	0	-0.147149	0	-0.0413811	0	0	0	0	0	0	0	0	0	0	0	0	0.254221	0	0	0	0	0	0	0	0	0	0	0	0	0	0	0	0	-0.00219013	0	0	0	0	0	0
974	TCTCAGCCACCCTCTA.1_1	shNC	1	1	0	0	1	0.0121406	0.0490838	0.00988803	-0.0441141	0	-0.0350942	0	0	0	0	-0.00206038	0.00290884	0	0.00376428	0	0	0	-0.000762385	0.121119	0	0	0	0.00400597	0	0.0748866	0	0.00177225	0	0	0	-0.0357493	0	0.0955008	0.00610639	-1.06762e-05	-0.00125031	0.00164812	0	0.00744493	0	0	0
975	TCTCCGAAGGTTGGTG.1_1	shNC	0	0	1	0	0	0	0	0	-0.0660934	0.00967728	-0.0412505	0	0	0	0	0	0	0	0	0	0	0	0	0.131964	0	0.0848302	0	0	0	0.0589194	-0.0042708	0.00265525	0	0	0.0028472	0	0	0.163852	0.00676609	0	-0.00152323	0	0	0	0	0	0
976	TCTCCGATCAAGTTGC.1_1	shNC	0	1	0	0	1	0	0.114946	0	0	0	0	0	0	0	0	0	0	0	0	0	0	0	0	0	0	0	0	0	0	0.191485	0	0	0.00676299	0	0	0	0	0	0	-2.50018e-05	0	0.00259353	0	0	0	0	0
978	TCTCCGATCGAAGAAT.1_1	shNC	0	1	0	0	1	0	0	0	-0.0994183	0	-0.0179521	0	0	0.0714761	0	0	0.00311303	0	0	0	0	0	0	0.184721	0	0	0	0	0	0.0569074	0	0.00256458	0	0	0	0	0	0	0	0	0	0.00174439	0	0.00505964	0	0	0
979	TCTGCCAAGTTCATGC.1_1	shNC	1	1	0	0	1	0	0	0	-0.177478	0	0	0	0	0	0	0	0	0	0	-0.0349382	0	0	0	0	0	0	0	0	0	0.213014	0	0	0.00574341	0	0	-0.104801	0	0.207051	0	-2.12326e-05	-0.0013058	0.00419262	0	0	0	0	0
980	TCTGTCGAGCCGGAAT.1_1	shNC	0	0	0	0	1	0	0	0	-0.132661	0	0	0	0	0	0	0	0	0.0832755	0	0	0	0	0	0.233645	0	0	0	0	0	0.118262	0	0	0.00868462	0	0	0	0	0	0	0	0	0	0	0	0	0	0
981	TCTTAGTCAATACAGA.1_1	shNC	0	0	1	0	1	0	0	0	-0.149078	0	0	0	0	0	0	0	0	0	0	-0.0593679	0	0	0	0	0	0	0	0	0	0	0	0	0.0130445	0	0	0	0	0	0.0152614	0	0	0	0	0	0	0	0
982	TCTTCCTGTGTTGCCG.1_1	shNC	1	1	1	0	0	0	0.177618	0	-0.100166	0	-0.0181139	0	0	0	0	0	0	0	0	-0.0256509	0	0	0	0.271687	0	0	0	0	0	0.128489	-0.00416213	0.00402408	0	0	0	-0.0521981	0	0.103126	0	0	-0.00149085	0.004051	0	0.00793907	0	0	0
984	TCTTGCGTCGTTCTCG.1_1	shNC	0	0	0	0	0	0	0	0	0	0	-0.0537034	0	0	0.21382	0	0	0	0	0	0	0	0	0	0.246241	0	0	0	0	0	0.217555	0	0	0	0	0	-0.154755	0	0	0	-4.62163e-05	0	0	0	0	0	0	0
985	TGAACGTTCAATCGGT.1_1	shNC	0	1	0	0	0	0	0	0	0	0	0	0	0	0	0	0	0	0	0	0	0	0	0	0.192681	0	0	0	0	0	0.177973	0	0	0	0	0	0	0	0	0	0	0	0.00500692	0	0	0	0	0
987	TGAATGCCAGCCCACA.1_1	shNC	1	0	0	0	1	0.0270654	0	0	-0.107349	0	0	0	0	0	0	0	0	0	0	0	0	0	0	0.196655	0	0	0	0	0	0.0624036	0	0.00534227	0	0	0	-0.0869935	0	0	0	-1.69414e-05	-0.00270215	0	0	0	0	0	0
990	TGAGACTAGAGTGAAG.1_1	shNC	0	1	1	0	1	0.00962478	0	0.0305664	0	0	-0.0558085	0.0165601	0	0.0864133	0	0	0.00230606	0	0	0	0	0	0	0.184208	0	0.0964653	0	0.00317583	0	0.152729	0	0.00573921	0	0	0.00203711	0	0	0	0	-1.14444e-05	0	0.000829722	0	0.00611702	0	0	-0.00501267
995	TGAGGGATCAGATGCT.1_1	shNC	0	0	0	0	0	0	0	0	0	0	0	0	0	0	0	0	0	0	0	0	0	0	0	0	0	0	0	0	0	0.244867	0	0	0	0	0	0	0	0	0	0	0	0.00356723	0	0	0	0	0
996	TGAGGTTAGTGTGTTC.1_1	shNC	0	0	0	0	0	0	0.172938	0	0	0	-0.0437094	0	0	0	0	0	0	0	0	0	0	0	0	0	0	0	0	0	0	0.18378	0	0.00828218	0	0	0	0	0	0	0	-3.76157e-05	-0.00231336	0.00361722	0	0	0	0	0
999	TGATCAGTCGTTTACT.1_1	shNC	0	1	1	0	1	0.0318385	0	0	0	0	0	0	0	0	0	0	0	0	0	0	0	0	0	0.289253	0	0	0	0	0	0	0	0	0.00724974	0	0	0	0	0	0	0	-0.00164828	0.00393596	0	0.00877741	0	0	0
1000	TGATCAGTCTCTGCCA.1_1	shNC	0	0	0	0	0	0	0	0	0	0	0	0	0	0.157987	0	-0.0116446	0	0	0	0	0	0	0	0.245676	0	0	0	0	0	0	0	0	0	0	0	-0.1544	0	0	0	0	0	0.00247575	0	0.0111836	0	0	0
1001	TGATCTTAGCTGCCAC.1_1	shNC	0	1	0	0	0	0	0.111702	0	-0.100392	0	0	0	0	0	0	0	0.0048957	0	0	0	0	0	0	0.186197	0	0	0.0330429	0	0	0.188095	0	0.00403318	0	0	0	0	0	0	0	0	0	0.00370216	0	0	0.0342092	0	0
1002	TGATTCTCAACCACGC.1_1	shNC	1	0	1	0	0	0	0.0851541	0	0	0	0	0	0	0.0856913	0	0	0.00563608	0	0	-0.0304777	0	0	-0.000694569	0.149027	0	0	0	0	0	0	0	0.00464312	0.00756605	0	0	0	0	0	0.00783474	-1.85218e-05	-0.00113909	0.00134283	0	0.0060659	0	0	0
1003	TGATTCTCAGAGAGGG.1_1	shNC	1	1	0	0	0	0	0	0	0	0	-0.056459	0	0	0	0	0	0	0	0	0	0	0	0	0.350729	0	0	0	0	0	0.206648	0	0.00604462	0	0	0	0	0	0	0	-3.64134e-05	0	0.00263997	0	0	0	0	0
1004	TGATTCTTCGAGAGCA.1_1	shNC	0	0	0	0	0	0	0	0	-0.214231	0	0	0	0	0	0	0	0.0079446	0	0	-0.0648776	0	0	0	0.403879	0	0	0	0	0	0.190977	0	0	0.0106651	0	0	0	0	0	0	0	0	0	0	0	0	0	0
1005	TGATTCTTCTCAGGCG.1_1	shNC	0	1	1	0	0	0	0	0	0	0	-0.0296652	0	0	0.118112	0	0	0	0.0484805	0	0	0	0	0	0.298751	0	0	0	0	0	0	-0.00971542	0.00423789	0	0	0	0	0	0	0	0	0	0.00406521	0	0	0	0	0
1006	TGATTTCAGGACGGAG.1_1	shNC	1	1	0	0	0	0	0	0	0	0.0100131	-0.0422168	0	0	0.0995172	0	0	0	0	0	0	0	0	0	0.114607	0	0.0566859	0	0.00275852	0	0.0938598	0	0.00165014	0	0.00557668	0	0	0	0	0.00420488	0	-0.00132288	0.00208747	0	0.00325555	0	0	0
1009	TGCACGGGTGTCATGT.1_1	shNC	0	0	0	0	1	0.0260334	0	0	0	0	0	0	0	0	0	0	0	0	0	0	0	0	0	0.16493	0	0	0	0	0	0	0	0	0	0	0	-0.103654	0	0	0	-3.09553e-05	0	0	0	0	0	0	0
1011	TGCAGTACACCAGTAT.1_1	shNC	0	0	0	0	0	0	0	0.0132988	-0.09093	0	0	0	0	0.101812	0	-0.0127804	0.00369883	0	0	-0.0133719	0	0	-0.000825236	0	0	0	0	0	0.0388974	0.0299334	0	0.00416523	0.00375684	0	0.00144649	-0.0465056	0	0.0537598	0.00343744	-1.38885e-05	-0.00049977	0	0	0.00266138	0	0	0
1012	TGCATGAGTTGCAACT.1_1	shNC	0	0	0	0	0	0	0	0	0	0	0	0	0	0	0	0	0	0	0	0	0	0	0	0	0	0.157567	0	0	0	0.169459	0	0.00763682	0.0124443	0	0	0	0	0.304346	0	0	0	0	0	0	0	0	0
1014	TGCGATACACATATGC.1_1	shNC	0	1	0	0	1	0.00918463	0.0502097	0.0293671	-0.0451259	0	-0.0208522	0	0	0	0	-0.00788839	0.00549063	0	0	0	0	0	-0.00102183	0	0	0	0	0	0.0231418	0.100371	0	0.0038401	0.00625751	0	0	0	0	0	0.00759076	-1.79451e-05	-0.000671647	0	0	0.005877	0	0	0
1016	TGCTCCAGTGGCCACT.1_1	shNC	1	1	0	0	0	0	0	0	-0.188444	0	0	0	0	0	0	0	0	0.0866059	0	0	0	0	0	0	0	0	0	0	0	0	0	0.00969762	0	0	0	0	0	0	0	0	0	0	0	0	0	0	0
1017	TGCTCGTAGTATGACA.1_1	shNC	0	1	0	0	0	0	0	0	0	0	0	0	0	0	0	0	0	0.102668	0	0	0	0	0	0	0	0	0	0	0	0	0	0.00897466	0	0	0	0	0	0	0	0	0	0	0	0	0	0	0
1019	TGCTCGTCAGCGAACA.1_1	shNC	0	0	0	0	1	0.0089547	0.0489527	0.0287355	-0.0439962	0.00644185	-0.0350318	0	0	0	0	0	0	0	0	0	-0.000260868	0	-0.000399288	0.189516	0	0	0	0.00295473	0	0.131021	0	0	0.00474974	0.00985066	0	0	0	0.0704398	0	-1.06477e-05	0	0.0019403	0	0	0	0	0
1020	TGCTGAAGTTCAAACC.1_1	shNC	0	0	0	0	0	0	0	0	-0.117342	0	0	0	0	0	0	0	0	0	0	0	0	0	0	0.151306	0	0	0	0	0.0601759	0.104605	0	0.00658768	0	0	0	0	0	0.187869	0	0	-0.00174649	0.00205887	0	0	0	0	0
1022	TGGAACTCAGAATCGG.1_1	shNC	1	0	1	0	0	0	0	0	0	0	0	0	0	0.150572	0	0	0.0044874	0.0422906	0	0	0	0	0	0.257677	0	0	0	0	0.04719	0.144762	0	0.00736052	0.0139876	0	0	-0.0745709	0	0.147327	0	0	0	0.0035063	0	0	0	0	0
1023	TGGAGGATCGATAACC.1_1	shNC	1	1	1	0	1	0.0124638	0.068136	0.0242533	0	0.00896624	-0.0270034	0	0	0.0685658	0	0	0.0046826	0	0	0	0	0	0	0.155285	0	0	0	0	0	0.149301	-0.00620473	0	0.00628607	0.00831415	0.002638	0	0	0.153736	0.00626896	-1.48202e-05	-0.000911444	0.00168481	0	0.00485362	0	0	0
1025	TGGATCATCGCGCCAA.1_1	shNC	0	0	0	0	0	0	0	0	0	0	0	0	0	0	0	0	0	0	0	0	0	0	0	0.178217	0	0	0	0	0	0.12321	0	0	0	0	0	0	0	0	0	0	0	0.00242507	0	0	0	0	0
1030	TGGGCTGGTCGCCACA.1_1	shNC	0	0	0	0	1	0	0	0	-0.197713	0	0	0	0	0	0	0	0	0.0771633	0	0	0	0	0	0.155763	0	0	0	0	0	0.107686	0	0.00485297	0.00790801	0	0	-0.0978926	0	0	0	0	-0.00179794	0	0	0	0	0	0
1031	TGGGTTAAGCAACCAG.1_1	shNC	0	0	0	0	0	0	0	0	0	0	-0.0272603	0	0	0.108537	0	0	0	0	0	0	0	0	0	0.266187	0	0	0	0	0	0.0864143	0	0.00563753	0	0	0	0	0	0	0	0	-0.00144278	0	0	0	0	0	0
1033	TGGGTTATCATTTGGG.1_1	shNC	0	1	0	0	0	0.0102982	0	0	-0.0505971	0	0	0	0	0	0	-0.00674661	0.00508735	0	0	0	0	0	-0.00074193	0	0	0	0	0.00549028	0	0.0451052	0	0.00490257	0	0	0	0	0	0	0	-1.22452e-05	-0.00155271	0.00214118	0	0	0	0	0
1034	TGGTACAGTAGATTGA.1_1	shNC	0	1	1	0	1	0.0254514	0.139135	0	0	0	-0.0351659	0	0	0	0	0	0.00609805	0	0	-0.0497982	0	0	0	0.222674	0	0	0	0	0	0.153945	0	0	0	0	0	0	0	0.200207	0	0	-0.00257028	0.00303	0	0	0	0	0
1036	TGGTAGTCAAGGCGTA.1_1	shNC	1	0	0	0	0	0	0	0	0	0	0	0	0	0	0	0	0	0	0	0	0	0	0	0	0	0	0	0	0	0.232235	-0.00908223	0.00564663	0	0	0	-0.153913	0	0.225032	0	0	0	0	0	0	0	0	0
1037	TGGTAGTTCTGAGGTT.1_1	shNC	0	0	0	0	0	0	0.0813641	0	-0.173008	0	-0.0313012	0	0	0	0	-0.0129629	0.00356604	0.0336075	0.0110255	-0.0291212	0	0	-0.000663655	0.0942921	0	0	0	0.00491105	0.0375009	0.0992236	0	0.00293778	0.00478716	0	0	-0.127291	0	0	0.00748603	0	-0.00165665	0	0	0.00882197	0	0	0
1038	TGGTTAGGTGACCGAA.1_1	shNC	1	1	0	0	1	0.0244011	0.106302	0	-0.0955387	0	-0.0389971	0	0	0.0681536	0	0	0.00465902	0.043908	0	0	0	0	0	0.123192	0	0.0993745	0	0	0.0312153	0.106875	0	0.0038382	0.0100794	0.0162771	0.00262214	0	0	0.0974539	0.00978046	0	-0.000905965	0.00210355	0	0.00950223	0.0207414	0	0
1040	TGTAAGCAGATGCAGC.1_1	shNC	0	0	0	0	0	0	0	0	0	0	0	0	0	0	0	0	0	0	0	-0.047309	0	0	0	0.251882	0	0	0	0	0	0	0	0	0.010843	0	0	-0.0962712	0	0	0	-2.87505e-05	0	0.00208441	0	0.0094158	0	0	0
1047	TGTAGACTCCGCAAAT.1_1	shNC	1	0	0	0	0	0	0	0	-0.137793	0.0242953	-0.0466629	0	0	0.106144	0	0	0	0	0	0	0	0	0	0.240976	0	0.0785786	0	0	0	0.14792	-0.00612569	0.00380848	0.00902056	0	0.00408379	-0.0768235	0	0.151777	0	0	-0.00141097	0	0	0	0	0	-0.0198099
1048	TGTCAGAGTTGCCATA.1_1	shNC	0	0	0	0	1	0	0	0	0	0	-0.0383314	0	0	0.04352	0	-0.00320768	0.00189545	0.0178633	0	0	0	0	-0.000772639	0.109777	0	0	0	0	0	0.102177	0	0.004065	0.00254451	0	0	-0.0314983	0	0	0	0	-0.000578511	0.00114396	0	0	0	0	0
1049	TGTCCACCACAGTATC.1_1	shNC	0	0	0	0	0	0	0.209457	0	-0.188249	0	0	0	0	0.210778	0	0	0	0	0	0	0	0	0	0.242737	0	0	0	0	0	0.215004	0	0	0	0	0	0	0	0	0.0192714	0	0	0.00330301	0	0	0	0	0
1050	TGTCCCACATGATCTG.1_1	shNC	0	1	0	0	0	0	0	0	0	0	0	0	0	0	0	0	0.00486635	0	0	0	0	0.0821121	0	0.128675	0	0	0	0	0	0.172385	-0.011128	0	0.0137612	0	0	0	0	0	0	0	-0.00148526	0	0	0	0	0	0
1051	TGTCCCATCTGAATCG.1_1	shNC	0	0	1	0	0	0	0	0	-0.0701722	0	-0.0429598	0	0	0	0	0	0	0	0	0	0	0	0	0.171775	0	0	0	0	0	0.0625555	-0.00453436	0	0.00704174	0	0	0	0	0.112348	0	-1.69826e-05	-0.00104443	0	0	0	0	0	0
1052	TGTCCTGGTTAACAGA.1_1	shNC	1	0	0	0	1	0	0	0.0471225	0	0	0	0	0	0	0	0	0.00580213	0	0	0	0	0	0	0.21384	0	0	0	0	0	0	0	0.00477992	0	0	0	0	0	0	0	0	0	0.00208761	0	0.0131443	0	0	0
1053	TGTGAGTAGAGTCAAT.1_1	shNC	1	0	0	0	0	0	0.100785	0.0132295	0	0.00836416	-0.0522412	0.0200048	0	0.115668	0	0	0.00162894	0	0	0	0	0	0	0.133206	0	0	0	0.00507279	0	0.16938	-0.00369129	0.003639	0	0.0190925	0	0	0	0	0	-8.08405e-06	-0.00170164	0	0	0.00717936	0	0	0
1056	TGTGCGGGTCTACGAT.1_1	shNC	0	0	1	0	0	0.0293903	0	0	0	0	-0.0282323	0	0	0.161682	0	0	0	0	0	0	0	0	0	0.223027	0	0	0	0	0	0.154189	0	0	0	0	0	0	0	0	0	0	0	0.00340655	0	0	0	0	0
1058	TGTGTGATCCATACAG.1_1	shNC	0	1	0	0	1	0.0143017	0	0	-0.0702672	0	0	0	0	0.0786764	0	0	0.00342663	0	0	0	0	0	-0.00063771	0.138856	0	0	0	0	0	0.0626402	0	0	0.00460002	0	0	-0.0569433	0	0	0	-1.70056e-05	0	0.0031927	0	0	0	0	0
1061	TGTTCATCAACAACAA.1_1	shNC	0	0	0	0	1	0	0	0	0	0	0	0	0	0	0	0	0	0	0	0	0	0	0	0	0	0	0	0	0	0	0	0	0	0	0	0	0	0	0	0	0	0	0	0	0	0	0
1062	TGTTCATTCCATCTAT.1_1	shNC	0	0	0	0	1	0	0	0	0	0.0109059	-0.0391425	0	0	0.126539	0	0	0.00363231	0	0	0	0	0	0	0.179476	0	0.0936766	0	0	0	0	0	0.00454024	0	0	0	0	0	0	0.00762514	-1.80263e-05	-0.00168208	0	0	0	0	0	0
1063	TGTTCCGAGCAGCACA.1_1	shNC	0	1	0	0	0	0	0	0	-0.0807215	0	-0.0415151	0	0	0	0	0	0	0	0	-0.032146	0	0	0	0.104086	0	0.0669098	0	0	0	0.149642	0	0.00324293	0	0	0.00520243	0	0	0.236354	0	-1.95357e-05	-0.00120145	0.00211897	0	0	0	0	0
1070	TGTTGGAAGATACAGT.1_1	shNC	0	0	0	0	0	0	0	0	-0.122033	0	-0.0476086	0	0	0	0	0	0	0	0	0	0	0	0	0.157355	0	0	0	0	0	0.108787	0	0.00490257	0.00798883	0	0	0	0	0	0	0	-0.00181631	0.00464685	0	0.00967224	0	0	0
1071	TGTTGGACACATCCCT.1_1	shNC	0	0	0	0	0	0	0	0	0	0	-0.0202255	0	0	0.0351772	0	-0.00593538	0	0	0	0	-0.000320931	0	-0.000491222	0	0	0.0260417	0	0	0	0.0641143	0	0.00217447	0.00354334	0	0	0	0	0.0503004	0	0	-0.00046761	0.000551248	0	0.0057004	0.0107056	0	0
1076	TTACCATAGTCAGAGC.1_1	shNC	1	0	0	0	0	0.0152439	0.0833341	0	0	0	-0.0210624	0	0	0.127117	0	0	0	0.0344212	0	0	0	0	0	0.146391	0	0	0	0	0	0.178805	0	0	0	0.0101687	0	0	0	0	0	-2.74758e-05	0	0.00131413	0	0.00593626	0	0	0
1077	TTACCATCAGAAGTGC.1_1	shNC	0	0	0	0	0	0	0	0.0355737	0	0	0	0	0	0	0	0	0	0	0	0	0	0	0	0.232467	0	0	0	0	0	0	0	0.00893609	0	0	0	-0.10684	0	0	0	0	0	0.00390281	0	0	0	0	0
1078	TTACCATGTTTGCAGT.1_1	shNC	0	0	0	0	0	0	0.169353	0	0	0	-0.0770549	0	0	0.119901	0	0	0	0	0	0	0	0	0	0.196262	0	0.0887625	0	0	0	0	-0.00691959	0.00430206	0.011864	0	0.00780697	0	0	0	0	0	-0.00159384	0.00187891	0	0	0	0	0
1079	TTACCGCCACACCTAA.1_1	shNC	0	0	0	0	1	0	0	0	0	0	0	0	0	0	0	0	0	0	0	0	0	0	0	0	0	0	0	0	0	0	0	0	0	0	0	0	0	0	0	0	0	0	0	0	0	0	0
1080	TTACCGCCAGGCACAA.1_1	shNC	0	0	0	0	1	0.0289478	0	0	0	0	0	0	0	0	0	0	0	0	0	-0.0392437	0	0	0	0.28693	0	0	0	0.00661812	0	0.17095	0	0.00571384	0.0111718	0	0	0	0	0	0	-2.38491e-05	-0.00146672	0.00365949	0	0	0	0	0
1083	TTAGGCAAGGTAGCCA.1_1	shNC	1	1	1	0	0	0.0064224	0.0351094	0	-0.110102	0	-0.0202964	0	0	0	0	-0.00260409	0.00153878	0	0	-0.0216378	0	0	-0.000788079	0.154303	0	0	0	0	0	0.0643389	0	0.00289949	0.00206571	0	0.00135932	-0.0703702	0	0.0869917	0	-7.63663e-06	0	0.00152362	0	0.00250099	0.0107524	0	0
1086	TTAGGGTCAGCATTGT.1_1	shNC	1	1	1	0	0	0.0106483	0	0.0207205	-0.0841016	0	-0.0147127	0	0	0.0585784	0	0	0	0	0	-0.033492	0	0	0	0.233549	0.000221576	0	0	0	0	0.0749729	0	0.00337872	0.00700474	0	0	-0.0867111	0	0	0	0	0	0.00302731	0	0.00414664	0	0	0
1091	TTCAATCGTAACTTCG.1_1	shNC	0	0	0	0	0	0.0118373	0.0647111	0	0	0	0	0	0	0	0	0	0.00283617	0	0.0087689	-0.0231609	-0.000344844	0	0	0.0749931	0	0	0	0.00778208	0	0.0819758	-0.0037581	0.00369431	0	0	0	-0.0471311	0	0.093115	0	-2.80435e-05	0	0	0	0.0106527	0	0	0
1092	TTCACCGCACTTCTCG.1_1	shNC	0	1	0	0	1	0	0	0	0	0	-0.0350732	0	0	0	0	-0.00692756	0	0	0	-0.033429	0	0	0	0.160817	0	0	0.027629	0	0	0	0	0.00337236	0.00549533	0	0	0	0	0.134397	0	-2.03154e-05	-0.0012494	0	0	0.0066533	0	0	0
1093	TTCACCGGTCGGTACC.1_1	shNC	0	0	0	0	0	0.031709	0.0967048	0	-0.155792	0	0	0	0	0	0	0	0.00423839	0	0	0	0	0	0	0.200886	0	0	0	0	0	0.0774795	0	0.00515558	0.00568976	0	0	-0.142927	0	0.205462	0	0	-0.0012936	0.00225169	0	0.012348	0	0	0
1095	TTCACGCCATGCAGGA.1_1	shNC	0	0	0	0	1	0	0.142505	0	-0.128076	0.0187527	0	0	0	0	0	0	0	0	0	0	0	0	0	0.165148	0	0	0	0	0	0	0	0.00514537	0.00838447	0	0	0	0	0	0	0	-0.00190627	0.00361894	0	0	0	0	0
1096	TTCACGCGTCAACCAT.1_1	shNC	0	0	0	0	0	0	0	0	0	0	0	0	0	0	0	0	0	0.101235	0	0	0	0	0	0	0	0	0	0	0	0.125028	-0.00906273	0.00563451	0	0	0	0	0	0	0	0	-0.00208748	0.00246085	0	0.0174589	0	0	0
1098	TTCATTGAGAGGGTCT.1_1	shNC	0	0	0	0	1	0	0.103612	0.0114117	-0.0288135	0	-0.0188616	0	0	0.0322617	0	-0.00669441	0.00244494	0	0	0	0	0	-0.00094022	0.0371535	0	0	0	0.0033671	0	0.114859	0	0	0.00188626	0	0	-0.0233499	0	0.0802706	0.00513256	0	-0.00120735	0.00117682	0	0.00642938	0	0	0
1100	TTCCGTGGTTGATGTC.1_1	shNC	0	0	1	0	1	0	0	0	-0.0977588	0	-0.0274917	0	0	0	0	0	0	0	0	0	0	0	0	0.126055	0	0	0	0	0	0.0871477	0	0.00392739	0	0.0132727	0	0	0	0	0	0	0	0.00334683	0	0.0111993	0	0	0
1102	TTCCTCTCAAACCACT.1_1	shNC	0	1	0	0	1	0.0221269	0.0790835	0.0281501	-0.15409	0	0	0	0	0	0	0	0.00530151	0.0499631	0	0	0	0	-0.000645053	0.236246	0	0	0	0	0	0.119881	0	0.00436749	0.00465298	0.00964999	0	-0.0880997	0	0.113796	0.00727619	0	-0.00200155	0.0012471	0	0.0122131	0	0	0
1103	TTCCTCTTCTTGTGCC.1_1	shNC	1	0	1	0	1	0.0231871	0.126757	0	-0.0752103	0	0	0	0	0	0	0	0	0	0	-0.0299513	0	0	0	0.180757	0	0	0	0	0	0.168946	-0.00736143	0	0.0104794	0	0	0	0	0	0	-1.82019e-05	0	0	0	0.0126877	0	0	0
1104	TTCGCTGTCCATCTCG.1_1	shNC	0	0	0	0	0	0	0	0	-0.0636968	0	0	0	0	0	0	0	0	0	0	0	0	0	-0.000900624	0	0	0	0	0	0	0	0	0	0	0	0	0	0	0	0	-1.54155e-05	0	0	0	0.00504857	0	0	0
1105	TTCGGTCAGCGGCTCT.1_1	shNC	0	1	0	0	1	0.0221151	0.120897	0	-0.0710307	0	-0.0433144	0	0	0.0795314	0	0	0	0.0326446	0	0	0	0	0	0.295329	0	0	0	0	0	0.119825	0	0.0054	0	0	0	-0.124818	0	0	0	0	-0.0020006	0.00321345	0	0	0	0	0
1107	TTCTAACCAGCAGATG.1_1	shNC	0	1	0	0	1	0	0	0	0	0	0	0	0	0	0	-0.0107012	0	0.0817441	0	0	0	0	0	0.167202	0	0	0	0	0	0	0	0.00520938	0.00848878	0	0	0	0	0	0	0	-0.00192998	0.00403908	0	0	0	0	0
1108	TTCTAACGTGCGGATA.1_1	shNC	0	0	1	0	0	0	0	0	0	0	-0.0502314	0	0	0	0	0	0	0	0	0	0	0	0	0	0	0	0	0	0	0.116197	0	0	0.00853303	0	0	0	0	0.208689	0	0	-0.00265854	0.00313406	0	0	0	0	0
1111	TTCTTCCAGTGAGGCT.1_1	shNC	0	0	0	0	0	0.00560974	0	0	0	0	-0.0450162	0	0	0.053962	0	-0.00397732	0.00235023	0	0	0	-0.000534933	0	-0.000250137	0.0621441	0	0.0399481	0	0	0	0.0699226	-0.00178097	0.00315112	0.00315503	0.00878308	0.00118732	0	0	0.0771611	0.00282154	-1.56561e-05	-0.000962851	0.000483598	0	0	0	0	0
1112	TTCTTCCGTACTCCCT.1_1	shNC	0	1	0	0	0	0.0264429	0	0	-0.0882266	0	0	0	0	0	0	0	0.00430244	0.0405475	0	0	0	0	0	0.113764	0	0	0	0	0	0.140405	0	0.00354444	0	0	0	-0.127635	0	0	0	0	-0.00234421	0.00312571	0	0.00699279	0	0	0
1113	TTCTTGACAGTCACGC.1_1	shNC	0	0	0	0	1	0	0	0.0260733	-0.0658325	0	-0.0286857	0	0	0.0737111	0	-0.0104874	0.00321037	0	0	0	0	0	0	0.13153	0	0	0	0.00442123	0	0.0586868	0	0	0.00667769	0.00893805	0	0	0	0	0.00673939	-3.07549e-05	-0.00097984	0	0	0	0	0	0
1115	TTGACCCGTTCGGTAT.1_1	shNC	0	0	0	0	1	0.00884291	0	0	-0.0717756	0	-0.0261065	0	0	0.103943	0	-0.00358553	0.00602412	0	0	0	0	0	-0.000842508	0.0560226	0	0.036013	0	0	0	0.0639849	-0.00280744	0.00288353	0.00284424	0	0	-0.0581657	0	0.0695604	0.00444774	-1.05148e-05	-0.0010683	0.00162885	0	0.0073579	0	0	0
1118	TTGATGGAGAATCCCT.1_1	shNC	0	0	0	0	0	0	0	0	0	0	0	0	0	0.231539	0	0	0	0	0	0	0	0	0	0	0	0	0	0	0	0	0	0.00626778	0.0102135	0	0	0	0	0	0	0	0	0	0	0	0	0	0
1119	TTGATGGTCACAACCA.1_1	shNC	1	1	0	0	1	0	0	0	-0.117204	0	0	0	0	0	0	0	0.00798887	0	0	0	0	0	0	0.211239	0	0	0	0	0	0.104483	0	0	0	0	0	-0.0949803	0	0	0	0	0	0.00454073	0	0	0	0	0
1120	TTGCATTCACTAACCA.1_1	shNC	1	1	1	0	0	0	0.0773735	0.0275414	0	0	-0.0508526	0	0	0.169999	0	0	0.00339114	0	0	-0.0425153	0	0	0	0.0896675	0	0	0	0	0	0.188265	0	0.00673298	0.00455237	0	0	0	0	0.111335	0	-1.68295e-05	-0.00196957	0	0	0.0104884	0	0	0
1122	TTGCTGCAGTGCTACT.1_1	shNC	0	1	0	0	1	0	0	0	0	0	0	0	0	0	0	0	0	0	0	0	0	0	0	0.214616	0	0	0	0	0	0.106538	0	0.00788168	0.0078237	0	0	0	0	0	0	0	-0.00177877	0	0	0	0	0	0
1125	TTGGATGAGTATGGCG.1_1	shNC	0	0	0	0	1	0.0271409	0	0	0	0	0	0	0	0	0	0	0	0	0	0	0	0	0	0.23463	0	0	0	0	0	0	0	0.00535719	0	0	0	0	0	0.213497	0	-3.22722e-05	0	0	0	0.0105692	0	0	0
1127	TTGGATGGTTGCACGC.1_1	shNC	0	0	0	0	0	0	0	0	-0.0737881	0	-0.0207507	0.0258401	0	0.0826188	0	0	0.00359833	0	0	0	0	0	0	0	0	0.0611627	0	0	0	0.18629	-0.0102117	0.00296438	0.00904928	0.0100182	0	-0.0597966	0	0	0	0	-0.00166905	0.00129469	0	0	0	0	0
1131	TTGTGTTTCGGCACTG.1_1	shNC	0	1	1	0	0	0	0	0	-0.110128	0	0	0	0	0	0	0	0	0	0	0	0	0	0	0.306482	0	0	0	0	0	0	0	0.00442429	0	0	0	0	0	0	0	0	-0.00163912	0.0019323	0	0	0	0	0
1132	TTGTTGTAGAGATCGC.1_1	shNC	0	1	0	0	1	0.0307778	0	0	0	0	0	0	0	0	0	0	0	0	0	0	0	0	0	0.194987	0	0.125344	0	0	0	0	0	0.00809868	0	0	0	0	0	0	0.0154804	0	0	0	0	0.0119854	0	0	0
1134	TTGTTGTTCCACACCT.1_1	shNC	0	0	0	0	0	0.0317542	0	0	-0.156015	0	0	0	0	0	0	0	0	0	0	0	0	0	0	0.201173	0	0	0	0	0	0.184346	0	0	0	0	0	0	0	0	0	0	0	0.0045728	0	0	0	0	0
1135	TTGTTTGGTATTAAGG.1_1	shNC	0	1	1	0	1	0	0	0	-0.187122	0	-0.038811	0	0	0	0	0	0.00673013	0	0	0	0	0	0	0	0	0	0	0	0	0	0	0.00554442	0	0	0	-0.11184	0	0	0	0	-0.00205411	0	0	0.0109385	0	0	0
1136	TTTACCATCACACGAT.1_1	shNC	0	0	0	0	0	0.0251311	0	0	-0.123474	0	-0.0480658	0	0	0	0	0	0	0	0	0	0	0	0	0.25901	0	0	0	0.00829238	0	0.179066	0	0.00496049	0.0111892	0	0	0	0	0	0.0126403	0	-0.00183777	0	0	0.0097865	0	0	0
1138	TTTACTGAGGACTATA.1_1	shNC	1	0	0	0	0	0	0.0879499	0	0	0	-0.022229	0.0415667	0	0.0885047	0	0	0.00385468	0	0	0	0	0.0650418	0	0.101924	0	0.0983869	0	0	0	0.232375	-0.0106953	0	0.00517465	0.019738	0.00340513	0	0	0	0	0	-0.00117649	0	0	0	0	0	0
1139	TTTACTGTCTGCGAGC.1_1	shNC	0	0	0	0	0	0	0	0	0	0	0	0	0	0	0	0	0	0	0	0	0	0	0	0.312595	0	0	0	0	0	0	0	0	0	0	0	-0.267613	0	0	0	0	0	0	0	0	0	0	0
1140	TTTATGCCATGTGCTA.1_1	shNC	0	1	0	0	1	0	0	0	0	0	0	0	0	0	0	0	0	0.0424425	0	0	0	0	0	0.236811	0	0	0	0	0	0.120234	0	0.00654081	0	0	0	-0.0748387	0	0	0	0	-0.00137452	0.00162037	0	0	0	0	0
1143	TTTCCTCAGAATCTAG.1_1	shNC	1	0	1	0	0	0.0418529	0	0	-0.236819	0	-0.0307804	0	0	0	0	0	0	0	0	0	0	0	0	0.265151	0	0	0	0	0.0561305	0.0975728	0	0.0043972	0	0	0	-0.149203	0	0.175239	0	-2.64891e-05	-0.00274033	0.00192046	0	0.0145928	0	0	0
1144	TTTCCTCTCATTGAGC.1_1	shNC	0	0	0	0	0	0	0	0	-0.128818	0	-0.0497518	0	0	0	0	0	0	0	0	0	0	0	0	0.282246	0	0	0	0	0	0.212477	-0.00564215	0.00350786	0	0.0118549	0.00762119	-0.0707594	0	0.139796	0	0	-0.0012996	0	0	0.0102101	0	0	0
1146	TTTGACTCAAGCGCAA.1_1	shNC	0	0	0	0	0	0	0	0	0	0	0	0	0	0	0	0	0	0	0	-0.0434948	0	0	0	0	0	0	0	0.00733503	0	0	0	0	0	0	0	0	0	0	0	0	-0.00230213	0.0027139	0	0	0	0	0
1147	TTTGACTGTAGATGTA.1_1	shNC	0	1	0	0	0	0	0.181023	0	0	0	-0.0457528	0	0	0	0	0	0	0	0	0	0	0	0	0.209786	0	0	0	0	0	0	0	0	0	0	0	-0.131844	0	0	0	0	0	0	0	0	0	0	0
1148	TTTGACTGTCCTTTGC.1_1	shNC	0	1	0	0	0	0	0	0	-0.130119	0	0	0	0	0.145691	0	0	0	0	0	-0.0710318	0	0	0	0	0	0	0	0.00873866	0	0.221218	0	0.00716577	0	0	0	-0.144546	0	0	0	0	0	0.00228307	0	0.0141373	0	0	0
1150	TTTGGAGCACGTCTCT.1_1	shNC	0	0	0	0	0	0.0297716	0	0	-0.196199	0	0	0	0	0	0	0	0	0	0	0	-0.000867306	0	0	0.252989	0	0	0	0	0	0.202452	0	0	0	0	0	0	0	0	0	0	0	0.00398473	0	0	0	0	0
1152	TTTGGTTTCAGTGGGA.1_1	shNC	0	0	1	0	1	0.0328665	0	0	-0.161479	0	0	0	0	0	0	0	0	0	0	0	0	0	0	0.314713	0	0	0	0	0	0.237803	0	0	0	0	0	-0.13086	0	0	0	0	0	0.00283332	0	0	0	0	0
1	AAACCCAGTGTTAGCT.1_2	shGFPT2	0	1	1	1	0	0	0	0	-0.0909771	0	0	0	0	0	0	0	0	0	0	0	0	0	0	0.25585	0	0	0	0	0	0.0811021	0	0.00647012	0.0087218	0	0	-0.107967	0	0	0	0	0	0.00319037	0	0	0	0	0
2	AAACGAAAGCGATGCA.1_2	shGFPT2	1	0	1	1	0	0	0	0.0549708	0	0.014004	-0.0575694	0	0	0	0	0	0	0	0	0	0	0	0	0.333258	0	0.115047	0	0	0	0.222993	-0.00618027	0.00384241	0.00908622	0	0.00412018	-0.0775079	0	0	0	-2.31471e-05	0	0.00293019	0	0.00758066	0	0	0
3	AAACGAAGTAGACAGC.1_2	shGFPT2	0	1	0	1	0	0.0130949	0	0.0254814	0	0	0	0	0	0	0	-0.0199631	0	0	0	0	0	0	-0.00130707	0	0	0	0	0	0	0	0	0.00258473	0	0.00873513	0	-0.0521383	0	0	0.0127897	-1.55706e-05	-0.00148942	0	0	0.00793148	0	0	0
4	AAACGCTCAGATCCTA.1_2	shGFPT2	0	1	1	1	0	0.0114337	0.0993738	0	0	0.00822523	-0.0317496	0	0	0.0628992	0	0	0.00273948	0	0	0	0	0	0	0.0724364	0	0.0740305	0	0	0	0.100645	-0.00362998	0.00527199	0.00367756	0	0	-0.0455243	0	0	0.00575086	-1.35954e-05	0	0.00156707	0	0.0044525	0	0	0
5	AAAGAACCAAGAGGTC.1_2	shGFPT2	0	0	0	1	0	0	0.0523358	0.0304275	0	0	0	0	0	0.110486	0	-0.00634022	0.00481204	0	0	0	0	0	0	0.167905	0	0	0	0	0	0.0419313	0	0.00188967	0.00645984	0	0	-0.0381178	0	0.123002	0	0	-0.00172565	0	0	0	0	0	0
7	AAAGGATCAAGTTCCA.1_2	shGFPT2	0	1	1	1	0	0	0	0.0377971	-0.095434	0	-0.0389622	0	0	0	0	0	0	0	0	0	0	0.0785275	0	0	0	0	0	0	0	0.148637	0	0	0	0.012957	0.00411115	0	0	0	0	0	-0.00248166	0.00292553	0	0	0	0	0
8	AAAGGTACACGACTAT.1_2	shGFPT2	0	0	0	1	0	0	0	0	0	0	0	0	0	0.229906	0	0	0.00620715	0	0	0	0	0	0	0.164128	0	0	0	0	0	0	0	0.0070385	0.0114694	0	0	0	0	0.203789	0	0	0	0.00360276	0	0	0	0	0
9	AAAGGTATCGAGCCTG.1_2	shGFPT2	0	0	0	1	1	0.0312833	0	0	0	0	0	0	0	0	0	0	0	0	0	0	0	0	0	0	0	0	0	0	0	0	0	0.00617482	0	0	0	-0.165549	0	0	0	0	0	0.00269683	0	0.0161915	0	0	0
13	AACACACAGGACTGGT.1_2	shGFPT2	0	0	0	1	0	0	0	0	0	0	0	0	0	0	0	0	0	0	0	0	0	0	0	0.343578	0	0	0	0	0	0	0	0	0	0	0	-0.147483	0	0.291375	0	0	0	0	0	0	0	0	0
14	AACACACCATCGAAGG.1_2	shGFPT2	0	0	0	1	0	0	0	0	0	0	-0.0551546	0	0	0	0	0	0	0	0	0	0	0	0	0	0	0	0	0	0	0.130337	0	0	0	0	0	0	0	0.314006	0	0	-0.00217612	0	0	0	0	0	0
19	AACCAACGTGTTGAGG.1_2	shGFPT2	0	1	0	1	0	0	0	0	0	0	0	0	0	0	0	0	0	0	0	0	0	0	0	0	0	0	0	0	0	0	0	0	0	0	0	-0.174457	0	0.344669	0	0	-0.00401042	0.00377726	0	0	0	0	0
20	AACCATGAGCTGGCCT.1_2	shGFPT2	0	1	0	1	1	0	0.0370284	0.0131804	0	0	0	0	0	0.0843235	0	-0.010931	0	0	0	0	0	0.0273837	-0.000302026	0.0429118	0	0.027585	0	0	0	0.101669	-0.00215042	0.00302555	0.00217861	0	0	-0.0269689	0	0.0532814	0	0	-0.00112091	0	0	0	0	0	0
21	AACCCAAGTGAGCTCC.1_2	shGFPT2	1	1	1	1	0	0.00786955	0	0	0	0	-0.0238432	0	0	0	0	-0.00831871	0.00316496	0	0	0	0	0	-0.00103651	0.0498561	0	0	0.012726	0	0	0.0755822	0	0.00458831	0	0	0	-0.0313332	0	0	0	-2.05191e-05	-0.000965981	0.00148764	0	0	0	0	0
24	AACGAAACAACCGTGC.1_2	shGFPT2	0	1	0	1	0	0	0	0.0487366	0	0	0	0	0	0	0	0	0	0	0	-0.0678776	0	0	0	0	0	0	0	0	0	0	0	0	0	0	0	0	0	0	0	0	0	0.00445523	0	0	0	0	0
25	AACGTCAGTACTGGGA.1_2	shGFPT2	0	0	1	1	0	0	0	0	0	0	0	0	0	0	0	0	0	0	0	0	0	0	0	0.170352	0	0	0	0	0	0.160986	0	0	0.00864867	0	0	0	0	0	0	0	0	0.00231804	0	0	0	0	0
31	AAGATAGCAGTTCCAA.1_2	shGFPT2	0	0	1	1	0	0	0	0	0	0	0	0	0	0	0	0	0	0.064347	0	-0.0557572	0	0	0	0.180537	0	0	0	0	0	0	-0.0090472	0.00562485	0.0091658	0	0	0	0	0	0	-3.38847e-05	0	0	0	0	0	0	0
37	AAGCCATTCAGGCGAA.1_2	shGFPT2	0	1	0	1	0	0	0.123893	0	-0.157126	0	0	0	0	0	0	0	0.00542999	0	0	0	0	0	0	0.202605	0	0	0	0	0	0.185416	-0.0145447	0.0063124	0.0122034	0	0	0	0	0	0.0160852	0	-0.00233863	0.00419781	0	0	0	0	0
38	AAGCGTTTCCGAGTGC.1_2	shGFPT2	0	0	0	1	0	0.00859657	0.0469949	0.0359721	-0.0700522	0	-0.0340896	0	0	0.0784357	0	-0.00749557	0.0020597	0	0	-0.0168201	0	0	-0.00110014	0.117116	0	0	0	0	0	0.108063	-0.00694076	0	0	0	0.00301774	-0.0736038	0	0	0	-2.19811e-05	0	0	0	0.00334766	0	0	0
39	AAGGAATCAATCCAGT.1_2	shGFPT2	1	0	1	1	0	0.0307655	0	0	0	0	0	0	0	0	0	0	0	0	0	0	0	0	0	0.259854	0	0	0	0	0	0.110568	-0.00538789	0	0.00811964	0	0	-0.0675706	0	0	0	0	0	0.00300994	0	0	0	0	0
42	AAGGAATTCTGGGCAC.1_2	shGFPT2	0	0	0	1	1	0	0.0741903	0	0	0	-0.0289924	0	0	0	0	-0.0134673	0	0	0	0	0	0	-0.000605141	0.0859784	0	0.0552695	0	0	0	0.0919048	0	0.00267876	0	0	0	0	0	0	0.00682599	0	0	0.0018089	0	0.0052849	0	0	0
43	AAGGTAAAGACGTCCC.1_2	shGFPT2	0	1	1	1	1	0.0188126	0	0	0	0	0	0	0	0	0	0	0	0	0	0	0	0	0	0.174035	0	0	0	0	0.0474006	0	0	0.00542228	0	0	0	-0.0749037	0	0	0	0	-0.00137571	0	0	0.00732595	0	0	0
45	AAGTACCAGAGCACTG.1_2	shGFPT2	0	1	1	1	0	0.0112487	0.0614935	0	-0.0880923	0	-0.0155422	0	0	0.0618814	0	-0.0119404	0.00632769	0	0	0	-0.000327698	0.0454764	-0.000501578	0.216997	0	0	0	0	0	0.0785305	0	0.00448035	0.00576693	0	0	-0.0447876	0	0	0	-1.33754e-05	-0.000822588	0.00312253	0	0.00438045	0	0	0
47	AAGTGAAAGGGAGGTG.1_2	shGFPT2	1	0	0	1	0	0	0	0	-0.125969	0	0	0	0	0.141044	0	0	0	0	0	0	0	0	0	0.224007	0	0	0	0	0	0.154867	0	0	0	0	0	-0.102083	0	0	0	0	0	0.00304815	0	0	0	0	0
48	AAGTGAAGTCAACACT.1_2	shGFPT2	0	0	0	1	1	0	0	0	-0.132373	0	0	0	0	0	0	0	0	0	0	-0.0527153	0	0	0	0.170688	0	0	0	0	0	0.208061	0	0	0	0	0	0	0	0	0	0	0	0	0	0	0	0	0
51	AATCACGTCTGCTAGA.1_2	shGFPT2	0	0	0	1	1	0	0	0	0	0	0	0	0	0.157273	0	0	0	0	0	0	0	0	0	0.284344	0	0	0	0	0	0	0	0.00564298	0	0	0	0	0	0	0	0	-0.00209062	0.00246456	0	0	0	0	0
52	AATCGACAGCTTACGT.1_2	shGFPT2	0	0	0	1	0	0	0	0	0	0	0	0	0	0	0	0	0	0	0	0	0	0	0	0.241078	0	0	0	0	0	0	0	0	0.0157002	0	0	0	0	0	0.0191397	0	0	0	0	0	0	0	0
53	AATCGTGTCTTCGTAT.1_2	shGFPT2	0	0	0	1	1	0.0370413	0	0	0	0	0	0	0	0	0	0	0	0	0	0	0	0	0	0.234668	0	0	0	0	0	0	0	0.00731136	0	0	0	0	0	0	0	0	-0.00270873	0	0	0	0	0	0
55	AATGACCCATCACGGC.1_2	shGFPT2	0	0	0	1	0	0.0202253	0	0	-0.209656	0	0	0	0	0	0	0	0	0	0	0	0	0	0	0.128134	0	0	0	0	0	0.153053	0	0.00575296	0.0065053	0	0	-0.0805286	0	0	0	0	0	0.00251259	0	0.0078761	0	0	0
56	AATGCCAGTGAAGCGT.1_2	shGFPT2	0	1	0	1	0	0	0	0	-0.174668	0	0	0	0	0	0	0	0	0	0	0	0	0	0	0.225226	0	0	0	0	0	0	0	0	0	0	0	0	0	0.279651	0	0	0	0	0	0	0	0	0
57	AATGGAAGTATTGCCA.1_2	shGFPT2	0	1	0	1	0	0.0198052	0	0	-0.0973069	0	0	0	0	0	0	0	0	0	0	0	0	0	0	0	0	0	0	0	0	0.0867449	0	0	0.00637016	0	0	-0.0788558	0	0	0	0	0	0.00296701	0	0.011157	0	0	0
58	AATGGCTAGCGCTGCT.1_2	shGFPT2	0	0	0	1	0	0	0	0	-0.247416	0	-0.0462653	0	0	0	0	0	0	0.0756092	0	0	0	0	0	0.31903	0	0	0	0	0	0.256702	0	0	0	0	0	0	0	0.263398	0	0	0	0.00288661	0	0.0171163	0	0	0
62	ACAAAGAAGCCAACCC.1_2	shGFPT2	1	0	0	1	0	0	0	0.029643	0	0	-0.0319089	0	0	0	0	0	0	0	0	0	0	0	0	0.146309	0	0.0620393	0	0	0	0.156507	-0.00902597	0.00300687	0.0114932	0.025656	0.00488794	0	0	0	0	-1.81137e-05	-0.00207901	0.00245087	0	0	0	0	0
63	ACAACCAAGCAACCAG.1_2	shGFPT2	1	1	1	1	0	0	0.104491	0	-0.0939114	0	0	0.0328872	0	0	0	0	0	0	0	-0.0373987	0	0	0	0.121094	0	0	0	0	0	0.192786	0	0	0.00895141	0	0.00404555	0	0	0.150356	0	0	0	0.00325857	0	0	0	0	0
66	ACACGCGAGGGACCAT.1_2	shGFPT2	0	0	0	1	0	0.0166372	0.0909508	0	0	0	-0.0521839	0	0	0	0	0	0	0	0	0	0	0	0	0	0	0	0	0.00548969	0	0.165421	-0.0119906	0	0	0	0	0	0	0.130872	0.00836807	0	-0.00121663	0.00214099	0	0	0	0	0
68	ACACTGACACCGTACG.1_2	shGFPT2	1	1	1	1	0	0.0248509	0	0	0	0	-0.0343362	0	0	0	0	0	0	0	0	-0.0486232	0	0	0	0.285157	0	0	0	0	0	0	0	0.00490517	0	0	0	-0.0989456	0	0.195483	0	0	-0.00181728	0.00349599	0	0	0	0	0
74	ACAGAAAGTGTATTCG.1_2	shGFPT2	0	0	0	1	0	0	0	0	0	0	0	0	0	0	0	0	0	0	0	0	0	0	0	0	0	0	0	0	0	0	0	0	0	0	0	0	0	0	0	-4.94001e-05	0	0.00452391	0	0	0.0695554	0	0
75	ACAGCCGAGACTCTAC.1_2	shGFPT2	1	1	1	1	0	0	0	0	0	0	0	0	0	0	0	-0.00639808	0.00378068	0	0	-0.030874	0	0	0	0.18482	0	0	0	0	0	0.145643	0	0.00721113	0.00507531	0	0	-0.0628269	0	0.124125	0	-1.87627e-05	0	0.00251491	0	0	0	0	0
80	ACCAAACCATCATTGG.1_2	shGFPT2	0	1	1	1	0	0	0.0831889	0	-0.074766	0	-0.0318808	0	0	0	0	0	0.00364602	0.0343612	0	-0.0297743	0	0	0	0.243508	0	0	0	0	0	0.0666506	0	0.0045544	0.00489453	0	0	0	0	0	0	0	0	0.00369328	0	0	0	0	0
81	ACCAACAAGTGGTTGG.1_2	shGFPT2	0	0	0	1	1	0	0	0	0	0	0	0	0	0	0	0	0	0	0	0	0	0	0	0	0	0	0	0	0	0	0	0.0108142	0	0	0	0	0	0	0	0	0	0	0	0	0	0	0
84	ACCACAATCTCAAAGC.1_2	shGFPT2	1	0	0	1	0	0	0	0	0	0	0	0	0.0113272	0	0	0	0.00383924	0	0	0	0	0	0	0.290913	0	0	0	0	0	0.105463	0	0.00475278	0	0	0	0	0	0	0	-1.90533e-05	-0.00117178	0	0	0.00623996	0	0	0
87	ACCCTTGAGTTTGCTG.1_2	shGFPT2	0	0	0	1	1	0.0302642	0	0	0	0	-0.0418157	0	0	0	0	0	0	0	0	0	0	0	0	0.191733	0	0	0	0.00998611	0	0.132554	0	0	0	0	0	-0.161138	0	0	0.0152221	0	0	0	0	0	0	0	0
91	ACCGTTCGTACCCGCA.1_2	shGFPT2	0	0	1	1	1	0	0	0	-0.170372	0	0	0	0	0	0	0	0	0	0	0	0	0	0	0.327308	0	0	0	0	0	0	0	0.00892759	0	0	0	0	0	0.272773	0	0	0	0.00298935	0	0.0135036	0	0	0
92	ACCTACCAGTGGCAGT.1_2	shGFPT2	1	0	1	1	0	0	0	0	-0.132425	0	0	0	0	0	0	0	0	0.0608605	0	0	0	0	0	0.170755	0	0	0	0	0	0.208115	0	0	0	0	0	0	0	0.212018	0	0	0	0.00317469	0	0	0	0	0
93	ACCTGAAGTACACGCC.1_2	shGFPT2	1	1	0	1	1	0.0207744	0.113568	0	-0.102069	0	0	0	0	0	0	0	0	0	0	0	0	0	0	0.225716	0	0	0	0	0	0.0587312	0	0.00510817	0.00431296	0	0	-0.141856	0	0	0.00674448	-2.4702e-05	-0.000980581	0.00115597	0	0	0.0224497	0	0
94	ACCTGAATCTCGTGAA.1_2	shGFPT2	0	0	0	1	1	0	0	0	0	0	0	0	0	0	0	0	0	0	0	0	0	0	0	0	0	0	0	0	0	0	0	0.00749322	0	0	0	0	0	0	0	0	0	0.00327264	0	0	0	0	0
96	ACGATGTAGCTACAAA.1_2	shGFPT2	1	0	1	1	0	0.0317462	0	0	0	0	-0.0438634	0	0	0	0	0	0	0	0	0	0	0	0	0.266592	0	0	0	0	0	0.184308	0	0.0062662	0	0	0	0	0	0	0	0	0	0.00457202	0	0	0	0	0
97	ACGGAAGTCGGACAAG.1_2	shGFPT2	0	1	0	1	1	0	0	0	0	0	0	0	0	0	0	0	0	0	0	0	0	0	0	0.205229	0	0	0	0	0	0.141885	0	0	0	0	0	0	0	0	0	0	0	0.00368798	0	0	0	0	0
99	ACGGTCGTCGTAACTG.1_2	shGFPT2	0	0	0	1	0	0	0	0	-0.125668	0	0	0	0	0	0	0	0.00612827	0	0	-0.050045	0	0	0	0.223572	0	0	0	0	0	0	0	0	0.00822679	0	0.00541356	0	0	0	0	0	-0.00187042	0	0	0	0	0	0
101	ACGTAACAGAAATCCA.1_2	shGFPT2	0	1	0	1	0	0	0	0	0	0	0	0	0	0	0	0	0	0	0	0	0	0	0	0.304896	0	0	0	0	0	0	0	0	0	0	0	0	0	0	0	-3.74191e-05	0	0.00360179	0	0	0	0	0
105	ACGTAGTGTCTGTGCG.1_2	shGFPT2	1	0	0	1	0	0	0	0	0	0	-0.0256407	0	0	0.102088	0	-0.00752451	0.0044463	0	0	0	0	0	0	0.117568	0	0	0	0	0	0.16233	-0.00589163	0.00366296	0	0.012379	0	0	0	0	0	0	-0.00198653	0	0	0.00722662	0	0	0
108	ACTATCTCAGATGCGA.1_2	shGFPT2	1	1	1	1	1	0	0	0.0412323	-0.148746	0	0	0	0	0.198821	0	0	0	0	0	-0.0414591	0	0	0	0.311906	0	0	0	0	0	0.158296	-0.0114741	0.00597577	0.00973763	0.0141346	0	0	0	0	0	0	0	0	0	0	0	0	-0.0110356
109	ACTATGGAGTGAGCCA.1_2	shGFPT2	0	1	1	1	0	0	0.0661084	0	0	0	0	0	0	0	0	0	0	0	0	-0.023661	0	0	0	0.12072	0	0.0492488	0	0	0	0.0529658	0	0.00376118	0.0061289	0	0	-0.0481488	0	0.0951257	0	-2.26577e-05	-0.00139345	0.00239312	0	0	0	0	0
111	ACTCCCATCTAGTGAC.1_2	shGFPT2	1	1	1	1	0	0	0	0.0603845	0	0	0	0	0	0	0	0	0	0	0	0	0	0	0	0.372478	0	0	0	0	0	0.180916	0	0.00612516	0.00998107	0	0	0	0	0	0	0	0	0	0	0	0	0	0
112	ACTCTCGCAAGCTCTA.1_2	shGFPT2	0	0	0	1	1	0.0207034	0	0	-0.10172	0	0	0	0	0	0	0	0	0	0	0	0	0	0	0.27431	0	0	0	0	0	0	0	0.00701504	0	0	0	0	0	0	0.0104132	-2.46176e-05	0	0	0	0	0	0	0
113	ACTCTCGGTATCGAAA.1_2	shGFPT2	0	0	0	1	0	0	0	0	0	0	0	0	0	0	0	0	0.00780426	0.0523403	0	0	0	0	0	0.14685	0	0	0	0	0	0	0	0	0.00745552	0	0	0	0	0	0.0116587	0	-0.00169506	0.00280798	0	0.0150175	0	0	0
114	ACTCTCGGTTAAACCC.1_2	shGFPT2	0	1	0	1	0	0.0422107	0	0	-0.207389	0	0	0	0	0	0	0	0	0	0	0	0	0	0	0.267418	0	0	0	0	0	0.184879	0	0	0	0	0	-0.211705	0	0	0	0	0	0.00363885	0	0.0164376	0	0	0
115	ACTGATGAGGAAAGGT.1_2	shGFPT2	0	0	0	1	0	0	0	0	0	0	-0.0446431	0	0	0	0	0	0	0	0	0	0	0	0	0	0	0.131586	0	0	0	0.141517	-0.0102579	0.00637759	0	0	0.00683862	0	0	0	0	0	0	0.00368018	0	0.0125823	0	0	0
120	ACTTAGGAGGGTGGGA.1_2	shGFPT2	0	0	1	1	0	0	0	0	-0.21442	0	0	0	0	0	0	0	0	0	0	0	0	0	0	0.276483	0	0	0	0	0	0	0	0	0	0	0	0	0	0.343295	0	0	0	0.00376221	0	0.0169948	0	0	0
123	ACTTTCATCCGTGGGT.1_2	shGFPT2	0	0	1	1	0	0.0257672	0	0	0	0	0	0	0	0	0	0	0.00997414	0	0	0	0	0	0	0.163243	0	0	0	0	0	0	0	0.00700762	0	0	0	-0.165749	0	0.202691	0	0	-0.00188428	0.00306056	0	0	0	0	0
124	AGAACAAGTTGATGTC.1_2	shGFPT2	0	0	0	1	0	0	0	0	0	0	0	0	0	0.171086	0	0	0	0	0	0	0	0.12573	0	0	0	0	0	0	0	0	0	0	0	0	0	0	0	0	0	0	0	0.00268102	0	0	0	0	0
126	AGAAGTATCGCGTGCA.1_2	shGFPT2	0	0	0	0	0	0	0	0	-0.200765	0	0	0	0	0	0	-0.012417	0	0	0	0	0	0	0	0.19401	0	0	0	0	0	0.134129	0	0	0	0	0	0	0	0	0	0	0	0.00352262	0	0	0	0	0
127	AGACAAAAGAGGTTTA.1_2	shGFPT2	1	1	1	0	0	0	0	0	-0.0538411	0.00788331	-0.0559434	0.0188548	0	0.0964816	0	0	0.0026256	0	0	0	0	0	0	0.280133	0	0	0	0	0	0	-0.00347908	0.00571496	0	0	0.00231939	0	0	0	0	0	0	0.00151192	0	0.00426741	0.0183466	0	0
128	AGACACTGTTTCACAG.1_2	shGFPT2	0	0	0	0	0	0	0	0	0	0	0	0.052453	0	0	0	0	0	0	0	0	-0.000888112	0.123248	0	0	0	0	0	0	0	0.133525	-0.00967861	0	0	0	0	0	0	0	0	0	0	0	0	0	0	0	0
129	AGACAGGCAAACTCGT.1_2	shGFPT2	1	1	0	0	0	0	0.0898059	0.0319668	0	0	-0.0226981	0	0	0	0	0	0.00393603	0	0	0	0	0	0	0.269901	0	0.0669027	0	0	0	0.164112	0	0	0	0	0	0	0	0.129225	0	-1.95336e-05	0	0.00211878	0	0.00639726	0	0	0
130	AGACCATCAATGTCAC.1_2	shGFPT2	0	0	1	0	1	0	0	0	-0.0816894	0	0	0	0	0	0	0	0.00594734	0	0	0	0	0	0	0.192018	0	0	0	0	0	0	0	0.00328181	0.0079839	0	0	-0.0988321	0	0	0	-1.977e-05	-0.00251847	0.00213986	0	0	0	0	0
131	AGACCATCACAGTATC.1_2	shGFPT2	1	0	1	0	0	0	0.0953226	0.0502289	0	0.0125438	0	0	0	0.17262	0	0	0	0	0	-0.0341171	0	0	0	0.110468	0	0	0	0	0	0.113057	-0.0123485	0.00344177	0.0100926	0	0	0	0	0	0	0	-0.00188761	0.00150318	0	0	0	0	0
133	AGACTCAAGCGAATGC.1_2	shGFPT2	0	1	1	0	1	0.0121568	0.10463	0.0236559	-0.0597288	0	0	0.065094	0	0.0668768	0	0	0	0	0	0	-0.000354152	0	0	0.294386	0	0.0779463	0.019659	0	0	0.1356	0	0	0.00615605	0	0	0	0	0	0	0	0	0.00164996	0	0.00473407	0	0	0
136	AGACTCACACCGGAAA.1_2	shGFPT2	0	0	0	0	0	0	0	0	0	0	-0.0501289	0	0	0	0	0	0	0	0	0	0	0	0	0.229851	0	0	0	0	0	0	-0.00840153	0	0.0136503	0	0	0	0	0	0	0	0	0	0	0	0	0	0
138	AGAGAATAGCGGTATG.1_2	shGFPT2	0	0	1	0	1	0	0	0	0	0	0	0	0	0	0	0	0	0	0	0	0	0	0	0.240969	0	0	0	0	0	0.0996053	0	0.0044888	0.00731457	0	0	-0.0905466	0	0	0	0	-0.00166302	0.00276468	0	0	0	0	0
139	AGAGAATGTGCCGTTG.1_2	shGFPT2	0	1	1	0	1	0.0270278	0.147753	0	0	0	0	0	0	0	0	0	0	0	0	-0.0528825	0	0	0	0.233834	0	0	0	0	0	0	0	0	0	0	0	0	0	0	0	0	0	0	0	0	0	0	0
141	AGAGCCCTCTCGTCAC.1_2	shGFPT2	1	0	1	0	1	0	0	0	0	0.00715377	-0.033488	0	0	0.0888531	0	0	0.00386986	0	0	0	0	0.040203	0	0.0630005	0	0.0404986	0.0160812	0	0	0.0707426	0	0.00536383	0.00954455	0.0107741	0.00210475	-0.039594	0	0	0	-1.18244e-05	0	0	0	0	0	0	0
142	AGATAGATCTGCGTCT.1_2	shGFPT2	0	0	1	0	0	0	0	0	-0.134805	0	0	0	0	0	0	0	0	0.0619541	0	0	0	0	0	0.275996	0	0	0	0	0	0.163651	0	0	0	0	0	-0.173456	0	0	0	0	0	0.00322104	0	0	0	0	0
145	AGCCAATCACGATAGG.1_2	shGFPT2	0	1	1	0	1	0.0223013	0	0	0	0	-0.0308134	0	0	0	0	0	0.00534328	0.0503568	0	0	0	0	0	0.321118	0	0	0	0	0	0.0976774	0	0.00623017	0	0	0	-0.088794	0	0	0	0	-0.00163083	0.00272101	0	0.0086845	0	0	0
146	AGCCACGAGCGTACAG.1_2	shGFPT2	0	1	0	0	0	0.0276846	0	0	0	0	-0.0262407	0	0	0	0	0	0	0	0	0	0	0	0	0.120319	0	0	0	0	0	0.146232	0	0.00659008	0	0	0	-0.075617	0	0	0	0	0	0.0023866	0	0.00739572	0	0	0
148	AGCGATTCATCTGTTT.1_2	shGFPT2	0	0	0	0	1	0	0	0	-0.196455	0	0	0	0	0	0	0	0	0	0	-0.047683	0	0	0	0.154394	0	0	0	0	0	0.148603	0	0	0	0	0	0	0	0.191703	0	0	-0.00178214	0.00292485	0	0.00949024	0	0	0
149	AGCGATTGTGATTCAC.1_2	shGFPT2	0	1	1	0	1	0	0	0	0	0	-0.0579476	0	0	0	0	-0.0105558	0	0	0	0	0	0	0	0.226809	0	0	0	0	0	0.114024	0	0	0	0	0	0	0	0	0.0130941	-3.09553e-05	0	0.00400237	0	0	0	0	0
150	AGCGATTGTTCAAGTC.1_2	shGFPT2	0	0	0	0	1	0	0	0	0	0	-0.0281141	0	0	0.0535716	0	-0.00643314	0.00233323	0	0	0	-0.000283693	0	-0.000434224	0	0	0	0	0	0	0.0891207	0	0.00313168	0	0	0	-0.0810155	0	0	0	-1.15793e-05	-0.00116023	0	0	0.00379222	0.0163037	0	0
154	AGCGTATGTCGAATGG.1_2	shGFPT2	0	0	0	0	0	0	0.13415	0	0	0	-0.0471428	0	0	0	0	0	0.00587955	0	0	0	0	0	0	0.155465	0	0.138954	0	0	0	0.10748	0	0	0.0109743	0	0	0	0	0	0	0	-0.0017945	0.00211547	0	0	0	0	0
155	AGCTCAAAGCACGATG.1_2	shGFPT2	0	0	0	0	0	0	0.172938	0	-0.237359	0	0	0	0	0	0	0	0	0	0	0	-0.00122237	0	0	0.200416	0	0	0	0	0	0.18378	0	0.0062442	0.010175	0	0	0	0	0	0	0	-0.00231336	0	0	0.0123191	0	0	0
156	AGCTCAATCTGAGGTT.1_2	shGFPT2	0	1	0	0	0	0	0	0	-0.117087	0	0	0	0	0	0	0	0	0	0	0	0	0	-0.00106262	0	0	0	0	0	0	0	0	0	0	0	0	0	0	0	0	-2.83366e-05	-0.0024363	0.00287206	0	0	0	0	0
157	AGGAAATCAATGGCCC.1_2	shGFPT2	0	1	1	0	1	0.0350493	0	0	-0.124616	0	-0.0350445	0	0	0	0	0	0.00607699	0	0	0	0	0	0	0.260739	0	0	0.0566789	0	0.0883108	0	0	0	0	0	0	-0.139551	0	0	0	0	0	0	0	0	0	0	0
161	AGGATAAAGGGACTGT.1_2	shGFPT2	0	1	1	0	0	0	0	0	-0.20355	0	0	0	0	0	0	0	0	0	0	0	0	0	0	0.373307	0	0	0	0	0	0	0	0	0	0	0	0	0	0	0	0	0	0	0	0	0	0	0
162	AGGCCACGTATCGAGG.1_2	shGFPT2	0	0	0	0	0	0	0	0	0	0	-0.0446778	0	0	0	0	0	0	0	0	0	0	0	0	0.204857	0	0	0	0.0106696	0	0	0	0	0	0	0	-0.128747	0	0	0	0	0	0	0	0	0	0	0
164	AGGCCACTCTGAGGTT.1_2	shGFPT2	0	0	0	0	0	0	0	0	0	0	0	0.0728983	0	0	0	0	0	0	0	0	0	0	-0.00188921	0	0	0	0	0	0	0	0	0	0.0136275	0	0	0	0	0	0	0	0	0	0	0	0	0	0
165	AGGCTGCGTATCATGC.1_2	shGFPT2	0	0	0	0	1	0.0436609	0	0	-0.214515	0	0	0	0	0	0	0	0	0	0	0	0	0	0	0.276606	0	0	0	0	0	0	0	0.0054322	0.00885188	0	0	0	0	0	0.0138423	0	0	0	0	0	0	0	0
167	AGGCTGCTCTTCCAGC.1_2	shGFPT2	0	0	1	0	0	0.0108385	0	0	0	0	-0.0355626	0	0.00766173	0.0955883	0	-0.00704541	0.00259687	0	0	0	-0.000315748	0.0438181	-0.00114767	0.0686656	0	0.0441403	0	0	0	0.0966718	-0.00344101	0.0043566	0.00558881	0.00722999	0	-0.0431544	0	0.0852585	0	-2.62446e-05	0	0.00149793	0	0.00422072	0	0	0
169	AGGGCCTCAGAAGTGC.1_2	shGFPT2	0	0	0	0	1	0.0248421	0.135805	0	-0.169318	0	0	0	0	0	0	0	0.00595206	0	0	-0.0486061	0	0	0	0.28509	0	0	0	0	0	0.108806	0	0.00490344	0	0	0	0	0	0	0.0124949	0	-0.0025201	0.00214156	0	0	0	0	0
171	AGGGTCCCATACAGGG.1_2	shGFPT2	0	0	0	0	0	0	0.159527	0	-0.143375	0	-0.0403198	0	0	0	0	0	0.00699177	0	0	0	0	0	-0.0013012	0	0	0	0	0	0	0.172074	0	0	0	0	0	-0.116188	0	0	0	0	0	0.00251565	0	0	0	0	0
174	AGGGTGATCGAAACAA.1_2	shGFPT2	0	1	1	0	1	0	0	0	0	0	0	0	0	0	0	0	0	0	0	0	0	0	0	0	0	0	0	0	0	0	0	0	0	0	0	-0.173418	0	0	0	-3.93742e-05	0	0	0	0.012895	0	0	0
175	AGGGTGATCTAGTACG.1_2	shGFPT2	0	0	0	0	0	0	0	0	0	0	-0.0579871	0	0	0.230876	0	0	0	0	0	0	0	0	0	0.43011	0	0	0	0	0	0.231779	-0.0168006	0	0	0	0	0	0	0	0	0	0	0.00361796	0	0	0	0	0
180	AGGTAGGAGCGTTACT.1_2	shGFPT2	0	0	1	0	0	0	0	0.017307	0	0	-0.0202851	0	0	0	0	-0.00360629	0.00213099	0	0	0	-0.000259103	0	-0.000396586	0.0930111	0	0	0	0	0	0.064303	0	0.00175556	0	0	0	-0.0891836	0	0	0.00447349	-2.25673e-05	-0.00107361	0.00163613	0	0.00346352	0.0148905	0	0
181	AGGTCTAAGATCACTC.1_2	shGFPT2	0	1	0	0	1	0	0	0.0410263	-0.103587	0	-0.0291308	0	0	0.115984	0	0	0	0	0	0	0	0	0	0.277441	0	0	0	0	0	0.0923437	0	0	0	0	0	0	0	0	0	0	-0.00154178	0.00402161	0	0	0	0	0
184	AGGTTACAGGAGAGGC.1_2	shGFPT2	0	1	0	0	0	0	0.103731	0.0369236	0	0	0	0	0	0	0	-0.00769383	0.00662835	0	0	0	0	0	-0.000846095	0	0	0.0772767	0	0	0	0.121169	0	0	0	0	0	0	0	0	0	0	-0.00202305	0	0	0	0	0	0
185	AGGTTACGTCGTCTCT.1_2	shGFPT2	0	0	0	0	0	0	0	0	0	0	0	0	0	0	0	-0.0168997	0	0	0	0	0	0	0	0	0	0	0	0	0	0.182552	-0.0132324	0.00822686	0	0	0	0	0	0	0	0	0	0	0	0	0	0	0
186	AGGTTACGTGACTCGC.1_2	shGFPT2	0	0	0	0	0	0	0	0	0	0	0	0	0	0	0	0	0	0	0	0	0	0	0	0.323214	0	0	0	0	0	0	0	0	0	0	0	0	0	0	0	0	-0.00249262	0	0	0	0	0	0
188	AGGTTGTCAAATTGCC.1_2	shGFPT2	0	1	0	0	0	0	0.204698	0	0	0	0	0	0	0	0	0	0.00533185	0	0	-0.0435413	0	0	0	0.237222	0	0	0	0	0	0.0974684	0	0	0.00715765	0	0	0	0	0	0	-2.64608e-05	0	0.00271626	0	0	0	0	0
191	AGTACCATCATAAGGA.1_2	shGFPT2	1	0	0	0	0	0.0236379	0	0	-0.162607	0	-0.0457282	0	0	0	0	0	0.00566353	0	0	0	0	0	0	0.209673	0	0	0	0	0	0.171312	0	0.00466574	0.010645	0	0	0	0	0	0	0	0	0.00203775	0	0	0	0	0
192	AGTACTGGTGTTCGAT.1_2	shGFPT2	0	0	0	0	1	0	0.0454529	0	0	0	-0.0191413	0	0	0.0990953	0	-0.00337128	0.00331926	0	0	0	0	0	-0.000370741	0.0526749	0	0	0	0	0	0	0	0.00164115	0.00579385	0	0	0	0	0	0.00418196	-2.14191e-05	0	0	0	0	0.0139201	0	0
193	AGTCAACCAACGACTT.1_2	shGFPT2	0	0	1	0	0	0	0	0	-0.0873059	0	0	0	0	0	0	0	0.00762227	0	0	0	0	0	0	0.249347	0	0	0	0	0	0.0778294	0	0	0.00571545	0	0	0	0	0.13978	0	-2.11292e-05	-0.00129945	0.00153187	0	0	0	0	0
197	AGTCTCCGTTCTCTCG.1_2	shGFPT2	0	0	0	0	0	0	0	0	-0.161351	0	0	0	0	0	0	0	0.0103651	0	0	0	0	0	0	0.31453	0	0	0	0	0	0.253526	0	0	0	0	0	0	0	0	0	0	0	0.00372939	0	0.0127886	0	0	0
198	AGTGACTTCCATTGGA.1_2	shGFPT2	1	1	0	0	1	0	0	0	0	0	0	0	0	0	0	0	0	0	0	0	0	0	0	0.281291	0	0	0	0	0	0	0	0.00555958	0	0	0	0	0	0	0	0	0	0	0	0	0	0	0
199	AGTGATCAGCACCTGC.1_2	shGFPT2	1	1	1	0	1	0	0	0	-0.0839898	0	-0.0236196	0	0	0	0	0	0	0	0	0	0	0	0	0.108301	0	0	0	0	0	0.180427	0	0.00501273	0	0	0	0	0	0	0	0	-0.00125009	0.0026663	0	0	0	0	0
200	AGTGATCTCACGGGAA.1_2	shGFPT2	0	1	1	0	0	0	0	0	0	0	-0.0361746	0	0	0	0	0	0	0	0	0	0	0	0	0.266793	0	0	0	0	0	0.157529	0	0	0	0	0	0	0	0	0	0	-0.00191458	0.00401754	0	0.0101955	0	0	0
202	AGTGTTGTCCACAAGT.1_2	shGFPT2	0	1	0	0	1	0.011846	0	0	0	0	-0.0258761	0	0	0.129815	0	-0.0209075	0.00448712	0	0	0	0	0.0478911	-0.00052821	0.118647	0	0.0482432	0	0	0	0.0518843	0	0.00465779	0	0	0	-0.0471656	0	0	0	0	0	0.00161447	0	0	0	0	0
206	ATACCTTTCGTAGCTA.1_2	shGFPT2	0	1	0	0	0	0	0	0	-0.0544328	0	-0.0153076	0	0	0.0973765	0	-0.0145613	0.00424108	0	0	0	0	0	-0.000494005	0.0701882	0	0	0	0.00365564	0	0.0982852	0	0	0.00569336	0	0	-0.0441113	0	0	0	-1.31735e-05	-0.00129442	0.00152595	0	0.00431431	0	0	0
207	ATACTTCTCAATGCAC.1_2	shGFPT2	1	1	1	0	1	0.0178691	0	0	0	0.0128547	0	0	0	0	0	0	0	0	0	0	0	0	0	0.283123	0	0	0.0288965	0	0	0.0782649	0	0	0	0	0	0	0	0.140562	0	0	-0.00130672	0.00227039	0	0	0	0	0
210	ATAGAGAAGCGATTCT.1_2	shGFPT2	0	0	1	0	1	0.0212739	0	0	0	0	-0.0230394	0	0	0.0917312	0	-0.00862591	0.00247366	0	0.00764808	0	0	0	0	0.10564	0	0	0	0	0	0.0452194	0	0.00419913	0.00332071	0	0	-0.0411069	0	0	0.00519284	-2.52959e-05	-0.000754987	0.000890025	0	0.00402046	0	0	0
215	ATATCCTTCGCCACTT.1_2	shGFPT2	0	0	1	0	0	0	0.127003	0	-0.114144	0	-0.045088	0	0	0	0	0	0.0055663	0.0524586	0	0	0	0	0	0.272655	0	0	0	0	0	0	0	0	0.00747238	0	0	-0.0925	0	0.182749	0	0	0	0.00371011	0	0	0	0	0
216	ATCACAGGTGGGTCAA.1_2	shGFPT2	1	1	1	0	0	0.012019	0.0657042	0	0	0	0	0.0475626	0	0.0661187	0	0	0.00454208	0	0	0	0	0	0	0.211239	0	0.0489477	0.0194362	0	0	0.052642	-0.00381577	0.00470859	0.00386579	0.00801741	0	0	0	0	0	-1.42913e-05	-0.000878914	0.00306911	0	0	0	0	0
217	ATCACGAAGCTCCATA.1_2	shGFPT2	1	0	0	0	1	0.0215411	0	0	-0.0688153	0	-0.0193522	0	0	0	0	0	0	0	0	0	-0.000408029	0	0	0.290645	0	0.0570407	0	0	0	0	0	0.00527534	0	0	0	0	0	0	0.0108346	0	0	0.00264517	0	0	0	0	0
218	ATCACGAAGTCATCGT.1_2	shGFPT2	0	0	0	0	0	0.036685	0	0	0	0	0	0	0	0	0	0	0	0	0	0	0	0	0	0.232411	0	0	0	0	0	0	0	0.00934933	0	0	0	0	0	0	0	0	0	0.00408329	0	0	0	0	0
219	ATCACGACAAGGCTTT.1_2	shGFPT2	0	0	0	0	0	0	0	0	-0.223608	0	0	0	0	0	0	0	0.0109044	0	0	0	0	0	0	0	0	0	0	0	0	0.199337	0	0	0	0	0	0	0	0	0	0	0	0	0	0	0	0	0
220	ATCACGAGTTCTAACG.1_2	shGFPT2	1	0	0	0	1	0.0147956	0.0808832	0	-0.1857	0	-0.0311479	0	0	0	0	0	0	0	0	0	0	0	0	0.222252	0	0	0	0	0.0372793	0	0	0.00292042	0	0	0	-0.0589097	0	0.116386	0	0	0	0	0	0	0	0	0
222	ATCAGGTCAGTGACCC.1_2	shGFPT2	0	0	0	0	0	0	0	0	-0.116755	0	0	0	0	0.130728	0	0	0	0.0750549	0	0	0	0	0	0	0	0	0	0	0	0.104082	0	0	0.00764335	0	0	0	0	0	0	0	0	0	0	0	0	0	0
227	ATCCCTGAGTGGAATT.1_2	shGFPT2	1	0	0	0	0	0	0.0565258	0	-0.104644	0	-0.0294278	0	0	0.0568823	0	-0.00676986	0.00247742	0.023348	0.00765972	0	0	0	-0.000461059	0	0	0	0	0	0	0.0731284	0	0.00491647	0.00332577	0.00689744	0	0	0	0.0813369	0	-2.53252e-05	-0.00122096	0.00143934	0	0.00650184	0	0	0
229	ATCCGTCAGGGAGGTG.1_2	shGFPT2	0	0	0	0	0	0	0	0	0	0	-0.0130139	0	0	0	0	0	0.00225672	0	0	0	-0.00027439	0	-0.00153633	0.0976943	0	0	0	0	0	0.0868749	0	0.00185913	0.00495989	0	0	-0.0375019	0	0	0	0	0	0	0	0.00366787	0	0	0
235	ATCGGCGTCAGCTAGT.1_2	shGFPT2	0	0	0	0	0	0	0	0	0	0	0	0	0	0.186515	0	0	0	0	0	0	0	0	0	0.214796	0	0	0	0	0	0	0	0.00669221	0	0	0	0	0	0	0	0	-0.00247934	0	0	0	0	0	0
236	ATCGGCGTCCCAAGTA.1_2	shGFPT2	0	0	0	0	0	0.0109128	0.0596571	0	-0.0858657	0	-0.0241471	0.0187762	0	0.0961418	0	0	0	0	0	-0.021352	0	0	0	0	0	0.0444427	0	0.00360084	0	0.113268	-0.00704353	0.00215401	0.00351	0	0.00230973	0	0	0	0	0	-0.00127801	0	0	0.00424963	0.0182702	0	0
237	ATCGTGAAGTTGTACC.1_2	shGFPT2	0	0	0	0	0	0	0	0	0	0	0	0	0	0	0	0	0	0	0	0	0	0	0	0	0	0	0	0	0	0.232488	0	0	0	0	0	0	0	0	0	0	0	0	0	0	0	0	0
238	ATCTCTACACCCTTGT.1_2	shGFPT2	1	1	0	0	0	0.0194818	0	0	0	0	0	0	0	0	0	0	0.00466775	0	0	0	0	0	0	0.123423	0	0	0	0	0	0	0	0.00384539	0	0	0.00412337	-0.112549	0	0	0	0	0	0.00243685	0	0	0	0	0
239	ATCTCTACACTGGATT.1_2	shGFPT2	0	0	0	0	0	0.00762342	0	0	0	0	-0.0177547	0	0	0.0419379	0	-0.00309107	0	0.0172139	0	0	0	0	-0.00057298	0.0482968	0	0.0310466	0	0	0	0.109823	-0.00407962	0	0.00541378	0	0.00161352	-0.0303532	0	0	0	-2.0014e-05	0	0	0	0	0	0	0
242	ATGAAAGGTTAGAAAC.1_2	shGFPT2	0	0	0	0	0	0	0.0811725	0.0175368	0	0	-0.012452	0	0	0	0	-0.0121762	0.00459379	0	0	-0.0176332	-0.000432567	0	0	0.0940701	0	0	0	0	0.0227073	0	0	0.00378447	0.00477589	0	0	0	0	0.0708919	0	-1.0716e-05	-0.000659036	0.00128005	0	0.0035095	0	0	0
243	ATGAAAGGTTCGGTAT.1_2	shGFPT2	1	1	1	0	1	0	0.109076	0	0	0	0	0	0	0	0	0	0.00690631	0	0	0	0	0	0	0.182614	0	0	0	0	0	0.0873914	-0.0143345	0.00568956	0.00641764	0	0	-0.0794435	0	0	0	0	0	0	0	0.0112249	0	0	0
245	ATGACCAGTCAATCTG.1_2	shGFPT2	1	0	1	0	0	0	0	0	0	0	0	0	0	0	0	0	0.00742424	0.093159	0	0	0	0	0	0.353366	0	0	0	0	0	0	0	0	0	0	0	0	0	0	0	0	0	0	0	0.0120667	0	0	0
246	ATGACCATCAAAGACA.1_2	shGFPT2	1	0	0	0	1	0	0	0	0	0	0	0	0	0	0	0	0.00699953	0	0	0	0	0	0	0.249121	0	0	0	0	0	0	0	0.00576636	0.00939639	0	0	-0.181529	0	0	0	0	0	0.00251844	0	0	0	0	0
247	ATGACCATCACTTGGA.1_2	shGFPT2	1	1	1	0	1	0.0139124	0.0256458	0.0162587	0	0	-0.0222814	0	0	0.0765346	-0.00416123	-0.0116309	0	0	0	0	-0.000243409	0	-0.00095516	0.102165	0	0.0462735	0	0.00154795	0.0118202	0.111434	-0.00265266	0.00318306	0.00365459	0.00312937	0.00240487	-0.0186786	0	0.0657254	0	-1.91751e-05	-0.000611006	0.00155882	0	0.00541772	0.0078541	0	0
248	ATGAGGGAGCATGCAG.1_2	shGFPT2	0	1	0	0	1	0	0	0	0	0	-0.0267113	0	0	0.076816	0	-0.00424141	0.00250629	0	0	0	0	0	-0.00062263	0	0	0.0426007	0	0	0	0.0458159	0	0.00332814	0.0019397	0	0	0	0	0	0	-2.0049e-05	0	0.000519884	0	0.00234844	0.0100965	0	0
249	ATGAGGGGTTGTCAGT.1_2	shGFPT2	0	0	0	0	0	0	0.227666	0	-0.204614	0	-0.0575416	0	0	0	0	0	0	0	0	0	0	0	0	0.263839	0	0	0	0	0	0	0	0	0	0	0	0	0	0	0	0	0	0	0	0	0	0	0
251	ATGATCGCAGCATACT.1_2	shGFPT2	0	1	0	0	1	0	0.151219	0	-0.135908	0	0	0	0	0	0	0	0.00662767	0	0	0	0	0	0	0	0	0	0	0	0	0.121157	-0.0119413	0	0.0120978	0	0	0	0	0	0	0	0	0.00324249	0	0	0	0	0
253	ATGCCTCGTATCGAAA.1_2	shGFPT2	1	1	0	0	1	0	0	0	-0.156113	0	0	0	0	0	0	0	0	0.0507695	0	-0.0439922	0	0	0	0.266784	0	0	0	0	0	0	0	0.00627173	0	0	0	0	0	0	0	0	0	0.00193828	0	0	0	0	0
254	ATGCGATCAGGTTCAT.1_2	shGFPT2	0	0	1	0	0	0	0.088835	0.0194895	-0.049209	0	-0.0287232	0	0	0.0893954	0	-0.0084291	0.00498083	0	0	0	0	0	-0.000446596	0.0634524	0	0.0407891	0	0	0	0.0711743	0	0.00320753	0.00322145	0	0	-0.0647012	0	0.0787855	0	-1.19092e-05	-0.000732418	0	0	0.0063281	0	0	0
255	ATGCGATTCGCTTACC.1_2	shGFPT2	1	1	0	0	0	0.0165133	0.0902735	0	-0.121274	0	0	0	0	0	0	0	0	0	0	-0.03231	0	0	0	0.156376	0	0	0	0	0	0.10811	0	0.0059528	0	0	0	0	0	0	0	0	-0.00120757	0.00212786	0	0	0	0	0
256	ATGGATCGTTGGTACT.1_2	shGFPT2	1	1	0	0	0	0	0	0	0	0	0	0	0	0	0	0	0	0.0799043	0	-0.040267	0	0	0	0.187289	0	0	0	0	0	0.129482	0	0	0	0	0	0	0	0	0	0	0	0.00452058	0	0	0	0	0
258	ATGGGAGCATCATTGG.1_2	shGFPT2	0	0	0	0	1	0	0	0	0	0	0	0	0	0	0	0	0	0	0	0	0	0	0	0	0	0	0	0.00695383	0	0.157675	0	0	0	0	0	-0.0839095	0	0	0	0	0	0.00259835	0	0	0	0	0
259	ATGGGTTGTCAGCTTA.1_2	shGFPT2	0	0	0	0	1	0	0	0	0	0	-0.0214861	0	0	0	0	0	0	0.081739	0	-0.0304263	0	0	0	0.0985178	0	0.0633303	0	0	0	0	0	0	0.0050017	0	0	-0.114918	0	0	0	0	0	0	0	0	0	0	0
261	ATGGTTGGTCTTGCTC.1_2	shGFPT2	0	0	0	0	0	0	0	0.0522928	0	0	0	0	0	0	0	0	0.00643874	0	0	0	0	0	0	0	0	0	0	0.00886725	0	0	0	0.00847063	0.0118164	0	0	0	0	0	0.0135166	0	-0.00196517	0	0	0	0	0	0
265	ATGTCCCGTCTACTGA.1_2	shGFPT2	0	1	0	0	1	0	0	0	0	0	0	0	0	0	0	0	0	0	0	-0.0989671	0	0	0	0.251727	0	0	0	0	0	0.221541	0	0	0	0	0	-0.158204	0	0	0	0	-0.00290563	0.00436045	0	0	0	0	0
266	ATGTCTTCATGACCCG.1_2	shGFPT2	0	0	0	0	0	0	0	0	0	0	-0.0586504	0	0	0	0	0	0	0	0	0	0	0	-0.00143074	0	0	0	0	0	0	0	0	0.0063334	0	0	0	0	0	0	0	0	0	0.00276609	0	0	0	0	0
268	ATTACTCCATGAAAGT.1_2	shGFPT2	0	0	1	0	1	0	0	0	-0.108525	0	-0.0305193	0	0	0	0	0	0	0	0	0	-0.000643478	0	0	0.235949	0	0	0	0	0	0.096745	0	0.00618167	0.00710452	0	0	-0.124695	0	0.173752	0	0	0	0.00321064	0	0	0	0	0
270	ATTACTCTCCCTCGAT.1_2	shGFPT2	0	0	0	0	1	0	0	0	-0.115736	0	0	0	0	0.129587	0	0	0	0	0	0	0	0	0	0.247176	0	0	0	0.00777269	0	0	0	0	0.00757663	0	0	0	0	0	0	0	0	0	0	0.0128518	0	0	0
272	ATTATCCAGTGTGTTC.1_2	shGFPT2	1	0	0	0	0	0	0	0.0150432	0	0	-0.0106815	0	0	0.0715545	0	-0.00690009	0.00185225	0	0	0	-0.000378922	0	-0.000579983	0.0489766	0	0	0	0	0	0.10059	0	0	0	0.00515688	0	0	0	0.0608117	0	-9.1923e-06	-0.000565327	0.000666442	0	0.00301048	0	0	0
276	ATTCAGGGTGACCGTC.1_2	shGFPT2	0	0	1	0	0	0	0	0	-0.144888	0	-0.0407453	0	0	0	0	0	0	0	0	0	0	0	0	0.251034	0	0	0	0	0	0.129161	-0.00936229	0	0.00948502	0	0	0	0	0	0	0	-0.00215648	0.00395726	0	0	0	0	0
278	ATTCATCAGCCTTCTC.1_2	shGFPT2	0	0	0	0	1	0	0	0	0	0	0	0	0	0	0	-0.0155088	0	0	0	0	0	0	0	0	0	0	0	0	0	0.167527	0	0	0	0	0.00809551	0	0	0	0	0	0	0	0	0	0	0	0
282	ATTCCTAGTTAGAAGT.1_2	shGFPT2	1	0	0	0	0	0	0	0	0	0.0113778	-0.021853	0.0272128	0	0.131045	0	0	0	0	0	0	0	0.0639416	0	0.1002	0	0.0644117	0	0	0	0.104334	-0.00756271	0.00312185	0	0.0194933	0.00334753	0	0	0	0	0	0	0	0	0	0	0	0
283	ATTCGTTAGGTCGTCC.1_2	shGFPT2	0	0	0	0	1	0	0.177646	0	-0.159659	0	0	0	0	0	0	0	0	0	0	0	0	0	0	0.312118	0	0	0	0	0	0	0	0	0	0	0	0	0	0	0.0163446	0	-0.00237634	0	0	0	0	0	0
284	ATTCGTTGTGATTGGG.1_2	shGFPT2	0	0	0	0	0	0	0	0	0	0	0	0	0	0	0	0	0	0	0	0	0	0	0	0.359004	0	0	0	0	0	0.153309	0	0	0	0	0	0	0	0	0	-3.01096e-05	-0.00185174	0	0	0.00986089	0	0	0
290	ATTGGGTCATCCCACT.1_2	shGFPT2	0	1	0	0	1	0.0235523	0	0	0	0	-0.0455934	0	0	0	0	0	0	0	0	0	0	0	0	0.209055	0	0	0	0	0	0.170864	0	0.00464885	0	0	0	-0.0937751	0	0.185268	0	0	0	0.00450773	0	0	0	0	0
291	ATTGGGTCATTGTGCA.1_2	shGFPT2	0	0	0	0	0	0.0319153	0	0	-0.156806	0	0	0	0	0	0	0	0	0	0	0	0	0	0	0.202193	0	0	0	0	0	0.185109	0	0.00629957	0	0	0	-0.168274	0	0.251053	0	0	0	0.00275132	0	0	0	0	0
292	ATTGTTCCACTGTGAT.1_2	shGFPT2	0	0	0	0	1	0	0	0	-0.191543	0	0	0	0	0.159021	0	0	0.00692592	0	0	-0.0565588	0	0	0	0	0	0	0	0	0	0.126609	0	0.00570572	0.00929757	0	0	-0.115094	0	0	0	0	0	0	0	0	0	0	0
293	ATTTACCCATAGGAGC.1_2	shGFPT2	1	1	0	0	0	0	0.0745746	0.0265452	-0.0872823	0	-0.0291173	0	0	0.075045	0	-0.0106276	0.00195689	0.0184423	0	-0.0159804	-0.000397407	0	-0.000364185	0.151018	0	0	0	0	0	0.145952	-0.00756789	0.00161213	0.00262699	0	0.00172866	-0.0325193	0	0.187511	0.00410801	0	-0.0012991	0.00259828	0	0.00691795	0	0	0
294	ATTTCTGCAGAATCGG.1_2	shGFPT2	0	1	1	0	1	0	0	0	0	0	-0.0409483	0	0	0	0	0	0.00494597	0	0	-0.04039	0	0	0	0	0	0	0	0	0	0	-0.00940895	0	0.00953228	0	0	0	0	0	0	0	0	0.00342977	0	0	0.0345604	0	0
295	ATTTCTGCAGTTCACA.1_2	shGFPT2	0	0	0	0	1	0	0.194111	0	-0.174457	0	-0.0490608	0	0	0	0	0	0	0	0	0	0	0	0	0.292159	0	0	0	0	0	0.201983	0	0.00700868	0	0	0	0	0	0	0	0	0	0	0	0	0	0	0
297	ATTTCTGGTTCAGCGC.1_2	shGFPT2	1	1	0	0	0	0.0376317	0.151313	0	0	0	0	0	0	0	0	0	0	0	0	0	0	0	0	0.238409	0	0	0	0	0	0	0	0.00546338	0.00890268	0	0	-0.110206	0	0	0	0	-0.00202408	0	0	0.0107787	0	0	0
298	ATTTCTGTCCATCTAT.1_2	shGFPT2	0	1	0	0	0	0	0.0715685	0	0	0	0	0	0	0	0	0	0.00487898	0	0	-0.0256152	0	0	0	0	0	0	0	0	0	0.111353	0	0.00258409	0.00421083	0	0	-0.101226	0	0.102982	0.0102422	0	-0.00214324	0.0033988	0	0.00990039	0	0	0
299	ATTTCTGTCTCATTTG.1_2	shGFPT2	0	1	1	0	1	0	0	0	0	0	-0.0334594	0	0	0	0	0	0.00580213	0	0	0	0	0	0	0.280288	0	0	0	0	0	0	0	0	0.00778896	0	0	0	0	0	0	0	-0.00177087	0.00381397	0	0	0	0	0
301	CAACAACTCCAAGAGG.1_2	shGFPT2	1	1	1	0	1	0	0	0.0298719	-0.0754235	0	-0.071702	0	0	0.0844499	0	0	0	0	0	-0.0300362	0	0	0	0.272728	0	0.0946515	0	0	0	0.101795	-0.00737867	0.00458749	0.0074754	0	0	-0.0611219	0	0.182823	0	0	0	0.00246473	0	0	0	0	0
304	CAACGATGTTCTTCAT.1_2	shGFPT2	0	0	1	0	0	0	0.110431	0	0	0	0	0	0	0	0	0	0.00484001	0	0	0	0	0	0	0.270135	0	0	0	0	0	0.0884773	0	0	0.00649738	0	0	0	0	0	0	0	0	0.00338072	0	0	0	0	0
305	CAACGATTCAACTCTT.1_2	shGFPT2	0	0	0	0	1	0.0105424	0.0332595	0.0118389	-0.029892	0	-0.0234516	0	0	0.118902	0	-0.00788764	0.00252592	0	0	0	-0.000177239	0	-0.000963761	0.0667896	0	0.0247773	0	0	0	0.0615958	0	0.00335023	0.00195687	0	0	0	0	0	0.00306009	-7.23426e-06	-0.000770939	0.000524484	0	0	0	0	0
306	CAACGATTCTCTCGAC.1_2	shGFPT2	1	1	0	0	1	0.0237537	0	0	-0.143216	0	0	0	0	0	0	0	0.00377649	0	0	-0.0308398	0	0	0	0.248672	0	0	0	0	0	0.127671	0	0	0.00506968	0	0	-0.0945772	0	0.123987	0	0	-0.0021316	0.00338376	0	0	0	0	0
310	CAAGAGGAGGAAGTCC.1_2	shGFPT2	0	1	0	0	0	0	0.0427335	0.0152112	0	0.00562343	-0.0502514	0.0225964	0	0.0722476	0	-0.0111664	0	0	0	0	0	0	0	0.129349	0	0	0	0	0	0.0894248	0	0.00259226	0.00552139	0	0	0	0	0.0614906	0	0	-0.000960386	0.00176009	0	0.00511425	0	0	0
313	CAAGGGATCCTGGCTT.1_2	shGFPT2	0	1	0	0	1	0.0234062	0	0	-0.161308	0	0	0	0	0	0	0	0.00930491	0	0	0	0	0	0	0.207998	0	0	0	0	0	0.143799	0	0.00648042	0	0	0	-0.130721	0	0	0	0	0	0.0040298	0	0	0	0	0
315	CAATACGGTACTCGAT.1_2	shGFPT2	1	1	0	0	0	0	0.209964	0	-0.188705	0	0	0	0	0	0	0	0	0.0867258	0	0	0	0	0	0.311613	0	0	0	0	0	0	0	0.00758109	0	0	0	0	0	0	0	0	0	0.00424023	0	0	0	0	0
317	CAATTTCGTCGTGTTA.1_2	shGFPT2	0	0	0	0	1	0.0321361	0	0	0	0	0	0	0	0	0	0	0	0	0	-0.0628774	0	0	0	0.203592	0	0	0	0	0	0.186154	0	0	0	0	0	-0.127952	0	0	0	0	0	0	0	0	0	0	0
322	CACCAAAGTGCCTAAT.1_2	shGFPT2	0	0	0	0	0	0	0	0	-0.17228	0	0	0	0	0	0	0	0	0	0	0	0	0	0	0.289168	0	0	0	0	0	0	0	0	0	0	0	0	0	0	0	0	-0.00256419	0	0	0	0	0	0
325	CACCGTTTCCGTATGA.1_2	shGFPT2	0	1	0	0	0	0.0205958	0	0	0	0	0	0	0	0	0	0	0.00317968	0	0	0	0	0	-0.000591752	0.0840762	0	0	0	0	0	0	0	0	0	0	0	-0.0528395	0	0	0	-2.44896e-05	-0.000970474	0.00114405	0	0	0	0	0
327	CACGGGTAGACAACAT.1_2	shGFPT2	0	1	0	0	1	0	0	0	-0.130094	0	0	0	0	0	0	0	0	0	0	0	0	0	-0.00118067	0.354274	0	0.107835	0	0	0	0.115973	0	0	0.00851658	0	0	-0.105426	0	0	0	0	0	0	0	0	0	0	0
331	CACTGAAGTCTTACAG.1_2	shGFPT2	0	1	0	0	0	0.0177738	0	0	-0.12883	0	0	0	0	0	0	0	0	0	0	0	0	0	0	0.16612	0	0	0	0	0	0.0778475	0	0.00350826	0.012661	0	0	-0.104402	0	0	0.00893973	0	-0.00129975	0	0	0	0	0	0
332	CACTGGGTCTGAATGC.1_2	shGFPT2	1	1	0	0	0	0	0.132271	0	0	0	-0.0549608	0	0	0	0	0	0	0.0546345	0	0	0	0	0	0	0	0	0.0391274	0	0	0	0	0.00477584	0	0	0	-0.158379	0	0	0	0	0	0.00290778	0	0	0	0	0
333	CACTGTCAGAAGGTAG.1_2	shGFPT2	0	0	0	0	0	0.0183806	0.147344	0	0	0	-0.0450485	0	0	0.101115	0	-0.0109286	0.0044039	0	0	0	0	0	-0.000819585	0.116447	0	0	0	0	0	0.142802	0	0.00362803	0.00591194	0.0179793	0	-0.0731835	0	0	0.00924492	0	0	0.00409621	0	0.00715771	0	0	0
334	CACTGTCGTTAAGACA.1_2	shGFPT2	1	0	0	0	0	0.0185847	0	0	0	0	0	0	0.0131375	0	0	0	0.00445282	0	0	0	0	0	0	0.172308	0	0	0	0	0	0	0	0	0	0	0	0	0	0	0	0	0	0	0	0	0	0	0
338	CAGATTGGTCAACATC.1_2	shGFPT2	1	1	1	0	0	0	0	0	-0.0773947	0	-0.0217649	0	0.0111353	0	0	0	0	0	0	0	0	0	0	0.184588	0	0	0	0	0	0	0	0.00310927	0	0	0	-0.0627193	0	0	0	0	0	0.00204672	0	0.00613426	0	0	0
341	CAGCACGCACAGCCTG.1_2	shGFPT2	1	0	0	0	0	0	0	0	0	0	0	0	0	0	0	0	0.00632222	0	0	0	0	0	0	0.16717	0	0	0	0	0	0.115573	0	0.0071445	0	0	0	0	0	0	0	0	0	0.00481114	0	0.0102756	0	0	0
344	CAGGCCATCACCATCC.1_2	shGFPT2	1	1	1	0	0	0	0.135019	0	-0.0968469	0.0141802	0	0.0216651	0	0.13587	0	0	0.00472281	0	0	0	-0.000366824	0	0	0.124879	0	0	0	0	0	0.201837	-0.00625802	0.00248542	0.00405004	0.0131489	0	0	0	0.09905	0.00633333	-1.49724e-05	-0.00180612	0.00212917	0	0	0	0	0
347	CAGTTCCCAAAGCGTG.1_2	shGFPT2	0	1	0	0	0	0.00999605	0	0	0	0	-0.0138114	0	0	0	0	-0.0203175	0	0	0.00740492	0	0	0	0	0	0	0.0407092	0	0.00329834	0	0.0437818	-0.00317354	0.00197306	0.00321514	0	0	-0.0398	0	0	0.00815978	-1.18859e-05	-0.000730984	0.000861729	0	0.00631756	0	0	0
350	CATACAGCAAAGGTTA.1_2	shGFPT2	0	0	0	0	0	0.0293312	0	0	-0.193832	0	-0.0405266	0	0	0	0	0	0	0	0	0	0	0	0	0	0	0	0	0	0	0.128468	0	0	0	0	0	0	0	0	0	0	0	0.00394183	0	0.0209769	0	0	0
351	CATACAGGTCTCGGGT.1_2	shGFPT2	0	0	1	0	0	0	0	0	0	0	0	0	0	0	0	0	0	0	0	0	0	0	0	0.25252	0	0	0	0	0	0	0	0.00586306	0	0	0	-0.118268	0	0	0	-3.53196e-05	0	0.00343612	0	0	0	0	0
352	CATACTTTCTTCCAGC.1_2	shGFPT2	0	1	0	0	1	0	0	0	0	0	0	0	0	0	0	0	0.00539459	0	0	0	0	0.0910253	0	0	0	0	0	0	0	0.139326	-0.0100991	0.00444418	0	0	0	0	0	0	0	0	-0.00164649	0.00194098	0	0.0123875	0	0	0
354	CATCGTCAGCTCGCAC.1_2	shGFPT2	0	0	0	0	0	0	0	0	0	0	0	0	0	0	0	0	0.00927326	0	0	0	0	0	0	0.313588	0	0	0	0	0	0	0	0.00763951	0	0	0	0	0	0	0	0	-0.0028303	0	0	0	0	0	0
355	CATCGTCTCAGGGTAG.1_2	shGFPT2	1	1	0	0	0	0	0	0	0	0	-0.0326602	0	0	0	0	-0.00958444	0	0	0	0	0	0	0	0.149753	0	0	0	0	0	0	0	0.0065326	0.0076029	0	0	-0.0941158	0	0	0.0118892	0	-0.00172857	0.0037531	0	0	0	0	0
356	CATGAGTCACGACAAG.1_2	shGFPT2	0	1	0	0	0	0	0.134057	0	-0.120484	0	-0.0226359	0	0	0	0	0	0.00392524	0	0	0	0	0	0	0.155357	0	0.0667194	0	0	0	0	-0.00520119	0.00484034	0.0120309	0.0109283	0.00346746	0	0	0	0	0	-0.00179326	0.00258484	0	0.0145661	0	0	0
362	CATGGATGTCCGGACT.1_2	shGFPT2	0	1	1	0	0	0	0	0	0	0	0	0	0	0	0	0	0.00901038	0	0	0	0	0	0	0	0	0	0	0	0	0	0	0	0.0120958	0	0	-0.149733	0	0	0	0	0	0.00324195	0	0	0	0	0
364	CATTCTAAGAAGCTCG.1_2	shGFPT2	0	0	1	0	1	0	0	0.0449821	0	0	0	0	0	0	0	0	0	0	0	-0.0452295	0	0	0	0	0	0	0	0	0	0	0	0	0	0	0	0	0	0	0	0	0	0.00331792	0	0	0	0	0
365	CATTCTATCGGAGTAG.1_2	shGFPT2	1	1	1	0	0	0	0	0	0	0	0	0	0	0	0	0	0.00699565	0	0	0	0	0	0	0.270707	0	0	0	0	0	0.127883	0	0.00400083	0	0	0	0	0	0.159443	0	0	-0.0025594	0.00392879	0	0	0	0	0
368	CATTGAGTCAGTCATG.1_2	shGFPT2	1	1	1	0	0	0	0	0	0	0	0	0	0	0	0	0	0	0	0	0	0	0	0	0.210182	0	0	0	0	0	0.219073	0	0.00654847	0	0	0	-0.132094	0	0	0	0	-0.00242609	0.00286002	0	0	0	0	0
370	CATTGCCTCATAGAGA.1_2	shGFPT2	1	1	1	0	1	0	0	0	0	0	-0.0490608	0	0	0	0	0	0.00617485	0	0	0	0	0	0	0.163274	0	0	0	0	0	0	0	0.00508698	0	0	0	0	0	0	0	0	0	0.00358919	0	0	0	0	0
372	CATTGTTCAGTCAACT.1_2	shGFPT2	1	0	0	0	0	0.0249834	0	0.0486152	0	0	0	0	0	0.137439	-0.0126794	0	0	0	0	0	0	0	0	0	0	0.101746	0	0	0	0.109425	-0.00793172	0.00493133	0.00803569	0	0	0	0	0.272339	0	0	0	0	0	0.0134821	0	0	0
374	CCAAGCGGTGTTGCCG.1_2	shGFPT2	0	0	0	0	1	0	0	0	-0.152243	0	-0.0428137	0	0	0	0	0	0	0	0	0	0	0	0	0.372148	0	0	0	0	0	0.135718	0	0.00611625	0	0	0	-0.123375	0	0	0	0	-0.00226596	0	0	0.0120667	0	0	0
375	CCAATGAAGGCTCCCA.1_2	shGFPT2	0	0	0	0	1	0	0	0	-0.152837	0	0	0	0	0	0	0	0	0	0	0	0	0	0	0.262206	0	0	0	0	0	0.181276	0	0	0.0100054	0	0	-0.123856	0	0	0	0	0	0.00268167	0	0	0	0	0
376	CCAATGAAGGCTGGAT.1_2	shGFPT2	0	1	0	0	0	0	0	0	-0.106499	0	-0.0299497	0	0	0	0	0	0	0	0	0	0	0	0	0.260372	0	0	0	0	0	0.0949396	0	0.00427853	0.00697195	0	0	0	0	0.17051	0	0	-0.00158512	0	0	0	0	0	0
379	CCAATGATCGATAACC.1_2	shGFPT2	1	1	1	0	0	0	0	0	0	0	-0.0282633	0	0	0	0	0	0	0	0	-0.0400235	0	0	0	0.129593	0	0	0	0	0	0	0	0	0	0	0	0	0	0	0	0	0	0.00253592	0	0	0	0	0
380	CCAATGATCGCGTGCA.1_2	shGFPT2	0	1	0	0	0	0	0	0	0	0	0	0	0	0	0	0	0	0	0	0	0	0	-0.00194168	0.275874	0	0	0	0	0	0.190725	0	0	0	0	0	0	0	0	0	0	0	0.00375392	0	0	0	0	0
381	CCACAAAGTAGCGATG.1_2	shGFPT2	0	0	0	0	0	0	0	0	-0.1766	0	0	0	0	0	0	0	0	0	0	0	0	0	0	0.227717	0	0	0	0	0	0.157432	0	0	0	0	0	-0.143114	0	0	0	0	0	0.0040155	0	0	0	0	0
382	CCACCATCAGACTCTA.1_2	shGFPT2	1	1	1	0	0	0.0200195	0	0	0	0	0	0	0	0	0	-0.0081173	0.00479659	0	0	0	0	0	0	0.183113	0	0	0	0	0	0.126595	0	0	0.00643909	0	0	0	0	0.157478	0	0	-0.00146397	0.00299022	0	0.00779594	0	0	0
389	CCCAACTAGGGACAGG.1_2	shGFPT2	0	1	0	0	0	0	0	0	0	0	0	0	0	0	0	0	0	0.0494723	0	0	0	0	0	0.234567	0	0	0	0	0	0.136264	0	0	0	0	0	0	0	0	0	0	0	0.00386688	0	0	0	0	0
390	CCCATTGGTAGCACAG.1_2	shGFPT2	0	1	1	0	1	0	0	0	0	0	0	0	0	0	0	0	0	0	0	-0.0479806	0	0	0	0.216037	0	0	0	0	0	0	0	0.00792801	0	0	0	0	0	0.192899	0	0	0	0	0	0	0	0	0
394	CCCTAACAGTGGAATT.1_2	shGFPT2	0	0	0	0	0	0.0213211	0	0	0	0	-0.0294591	0	0	0.117291	0	0	0.00510843	0	0	0	0	0	0	0.326527	0	0	0	0.00703519	0	0.133273	0	0	0	0	0	0	0	0	0	-2.5352e-05	-0.00155915	0	0	0	0	0	0
399	CCGATGGAGACTTCCA.1_2	shGFPT2	0	1	0	0	1	0	0.0524094	0	-0.0987828	0	-0.0132463	0	0.00677703	0	0	-0.00388724	0	0.0216477	0	-0.0306315	0	0	0	0.197433	0	0.0390434	0	0	0	0.116189	-0.00304368	0.00189232	0	0	0	-0.0623334	0	0.12315	0	0	-0.00227893	0.00268654	0	0.00373335	0	0	0
400	CCGATGGTCGAAGCCC.1_2	shGFPT2	0	0	0	0	0	0	0.110761	0	0	0.0145754	-0.0741979	0	0	0.160569	0	0	0.00485446	0	0	0	0	0	0	0.12836	0	0.118869	0	0	0	0.0887414	-0.00926658	0.0039992	0	0	0	0	0	0	0.0101907	0	-0.00213444	0	0	0	0	0	0
403	CCGGGTAAGGGACAGG.1_2	shGFPT2	0	0	0	0	0	0	0	0	-0.193796	0	0	0	0	0	0	0	0	0	0	0	0	0	0	0.185781	0	0	0	0	0	0	0	0.00578822	0	0	0	0	0	0	0	0	0	0.00252799	0	0	0	0	0
404	CCGGTGACATGTGGCC.1_2	shGFPT2	1	1	0	0	1	0.0276279	0	0	-0.135741	0	-0.0381732	0	0	0	0	0	0.00453896	0	0	0	0	0	0	0.292677	0	0	0	0	0	0	-0.00877129	0	0.00609324	0	0	0	0	0.14902	0	0	-0.00202035	0	0	0.0188121	0	0	0
410	CCTAACCTCGTGGCTG.1_2	shGFPT2	0	1	0	0	1	0.0261517	0	0	0	0	0	0	0	0	0	0	0	0	0	0	0	0	0	0.227647	0	0	0	0.00862913	0	0.114542	0	0.0070926	0	0	0	0	0	0	0	0	-0.00262768	0.00401449	0	0	0	0	0
411	CCTAAGAGTTATAGCC.1_2	shGFPT2	0	0	0	0	1	0	0	0	0	0	0	0	0	0	0	0	0.00742965	0	0	0	0	0	0	0.196452	0	0	0.0501455	0	0	0	0	0	0.00997379	0	0	-0.123465	0	0	0	0	0	0.0026732	0	0.0160757	0	0	0
413	CCTCAACAGCACACAG.1_2	shGFPT2	1	1	1	0	1	0	0	0	0	0	-0.0477199	0.0266304	0	0.128725	0	0	0	0	0	0	0	0	0	0.148243	0	0.133676	0	0	0	0.143766	-0.00742885	0.00461869	0.00845733	0.013275	0.00200216	-0.0376643	0	0.121751	0.00475795	-1.84039e-05	-0.00145528	0	0	0.00368375	0	0	0
415	CCTCATGAGGTGGGTT.1_2	shGFPT2	0	0	0	0	0	0	0	0	0	0	-0.0340301	0	0	0	0	-0.00998645	0	0	0	0	0	0	0	0.324154	0	0	0.0398287	0	0	0.149887	0	0.00486144	0	0	0	0	0	0.19374	0	0	0	0.00295012	0	0.00959109	0	0	0
416	CCTCATGGTCAAAGTA.1_2	shGFPT2	0	0	0	0	1	0	0	0	0	0	-0.02647	0	0	0.10539	0	0	0	0	0	0	0	0	-0.000542683	0.0771044	0	0	0	0.00401586	0	0.147158	-0.00386391	0.00240228	0.00896811	0.00811854	0.00405478	0	0	0.0957366	0.00612147	0	-0.00140095	0.00165153	0	0	0	0	0
418	CCTCCTCTCGTTCTGC.1_2	shGFPT2	1	1	0	0	1	0.00905842	0.0495197	0	-0.0445058	0	-0.0206063	0	0	0.105892	0	-0.016347	0	0	0	0	0	0	0	0.161863	0	0.0368907	0.0146486	0.00298896	0	0.0843081	0	0.00379942	0.0047969	0	0	-0.0593805	0	0	0	-3.03798e-05	-0.000662417	0.000780898	0	0.00749584	0	0	0
424	CCTTGTGTCGAGTCCG.1_2	shGFPT2	0	0	0	0	0	0	0	0	-0.213432	0	-0.0456056	0	0	0	0	0	0	0	0	0	0	0	0	0	0	0	0	0	0	0	0	0	0	0	0	0	0	0	0	0	0	0	0	0	0	0	0
432	CGACAGCCACGGCCAT.1_2	shGFPT2	0	0	0	0	0	0	0	0	-0.148037	0	-0.0416308	0	0	0	0	0	0.00721911	0	0	0	0	0	0	0.255471	0	0	0	0	0	0.131968	0	0.00594726	0.00969117	0	0	0	0	0	0	0	0	0	0	0.0117333	0.0504442	0	0
434	CGAGAAGGTGAGTAAT.1_2	shGFPT2	1	0	0	0	0	0	0	0	0	0	0	0	0	0	0	0	0	0	0	-0.0413227	0	0	0	0.1338	0	0	0	0	0	0.157919	0	0.00416868	0	0	0	0	0	0	0	0	0	0.00310823	0	0	0	0	0
435	CGAGAAGTCAAACGAA.1_2	shGFPT2	1	0	0	0	0	0	0	0	-0.126131	0	0	0	0	0.141226	0	0	0	0	0	0	0	0	0	0.16264	0	0	0	0.00847083	0	0.216936	0	0.00506723	0	0	0	0	0	0	0.0129123	0	-0.00187732	0	0	0	0	0	0
436	CGAGGAACAGCACAAG.1_2	shGFPT2	0	0	0	0	1	0	0	0	0	0	-0.033812	0	0	0.134622	0	0	0.00586326	0	0	0	0	0	0	0.254078	0	0	0	0	0	0	0	0.00671951	0	0	0	-0.135544	0	0.192498	0	0	-0.00178953	0	0	0.00952962	0	0	0
437	CGAGGCTTCCCTCTTT.1_2	shGFPT2	0	1	0	0	1	0	0.0780002	0	-0.0701026	0.0102643	-0.042931	0	0	0.0784922	0	-0.00578533	0	0	0	0	0	0	0	0.138586	0	0	0	0	0	0.0958111	0	0.00281632	0.00703595	0.00951781	0	-0.05681	0	0.112237	0	0	-0.00159967	0.00123002	0	0	0	0	0
439	CGAGTGCCAGCTGCCA.1_2	shGFPT2	1	1	1	0	1	0.0166052	0.0907756	0	0	0	0	0.0426635	0	0.136408	0	0	0	0	0	-0.0324897	0	0	0	0	0	0.0676251	0	0	0	0.0727291	-0.0109244	0.00489437	0.0053409	0	0	0	0	0.13062	0	0	0	0.00296637	0	0.00646634	0.0278003	0	0
440	CGAGTGCCATGGCCCA.1_2	shGFPT2	1	1	1	0	1	0	0	0.0396467	-0.100104	0	-0.0281512	0	0	0	0	0	0	0.0460062	0	0	0	0	0	0.30503	0	0	0	0	0	0.172745	0	0.00693423	0	0	0	0	0	0.160271	0.0102478	0	0	0.00340004	0	0	0	0	0
441	CGATCGGTCGGCTGAC.1_2	shGFPT2	0	1	0	0	0	0.0389993	0	0	-0.142086	0	0	0	0	0	0	0	0	0	0	-0.0565835	0	0	0	0.183213	0	0	0	0.00954235	0	0	0	0.00570821	0	0	0	0	0	0.227486	0	0	0	0.00460238	0	0	0	0	0
442	CGATGCGCACTAGGTT.1_2	shGFPT2	0	1	1	0	1	0	0	0	0	0	-0.0549811	0	0	0	0	0	0	0	0	0	0	0	0	0.252099	0	0	0	0	0	0.147797	0	0.00666058	0.012799	0	0	0	0	0	0	0	-0.00177027	0.0020869	0	0	0	0	0
448	CGCATGGGTACCACGC.1_2	shGFPT2	0	1	0	0	1	0	0	0	0	0	0	0	0	0	0	0	0	0	0	0	0	0	0	0.185989	0	0	0	0	0	0	0	0	0	0	0	0	0	0.230932	0	0	0	0.00253081	0	0	0	0	0
449	CGCCAGACAGAGTTCT.1_2	shGFPT2	1	1	0	0	1	0	0	0	-0.0829488	0	-0.0233268	0	0	0	0	-0.0087221	0.00515397	0	0	-0.0204979	0	0	-0.000467136	0.106958	0	0	0	0	0	0.0458852	0	0.00333241	0	0	0.0035733	-0.0672203	0	0.169211	0	-1.2457e-05	-0.0012346	0.000903129	0	0.00657448	0	0	-0.00545615
452	CGGAACCCAGATAAAC.1_2	shGFPT2	1	1	1	0	1	0.0237597	0	0	0	0	0	0	0	0	0	0	0.00796288	0.05365	0	-0.0464882	0	0	0	0.298938	0.000494405	0	0	0	0	0.145565	-0.0124638	0	0	0	0	-0.132326	0	0.186899	0	0	0	0.00204825	0	0	0	0	0
453	CGGAATTTCTGACAGT.1_2	shGFPT2	0	0	1	0	1	0.00713174	0	0	-0.0350396	0	-0.0263856	0	0	0.0666981	0	-0.0140656	0.00382615	0	0	0	-0.000353205	0.0288322	0	0.0451818	0	0	0	0	0	0.0951872	-0.00384922	0	0.00836825	0.0127386	0	0	0	0.0560999	0.00358707	0	0	0.00224288	0	0.00472142	0	0	0
454	CGGACACCACGAAGAC.1_2	shGFPT2	1	0	1	0	1	0	0	0	0	0	0	0	0	0	0	0	0.00773946	0	0	0	0	0	0	0.204644	0	0	0	0	0	0.186939	0	0	0	0	0	-0.128613	0	0	0	0	0	0.00278467	0	0	0	0	0
455	CGGCAGTCAGAGTCTT.1_2	shGFPT2	1	0	0	0	1	0	0	0	0	0	0	0	0	0	0	0	0.00747236	0	0	0	0	0	0	0.284709	0	0	0	0	0	0.162519	0	0.00615589	0	0	0	-0.0874966	0	0.172864	0.011053	0	-0.001607	0.00319876	0	0	0	0	0
458	CGGGCATCACGGTGCT.1_2	shGFPT2	1	1	1	0	0	0.0153994	0.084184	0	-0.176764	0	0	0	0	0	0	0	0.00368963	0	0	0	0	0	0	0.284833	0	0	0	0	0	0.125514	0	0.00645687	0.00495308	0	0	-0.0927774	0	0.121135	0	-1.83108e-05	0	0.00353975	0	0.0059968	0	0	0
460	CGGGTCATCTCGCTTG.1_2	shGFPT2	1	0	1	0	0	0.0139435	0	0	0	0	-0.0192656	0	0	0	0	0	0.0033408	0	0	0	0	0	-0.000621738	0.193803	0	0	0	0	0	0.133985	-0.00971196	0.00423604	0	0.0177691	0.00295118	0	0	0	0	0	0	0.00229637	0	0	0	0	0
465	CGTAGTACAATCTGCA.1_2	shGFPT2	0	0	0	0	0	0	0	0	0	0	-0.0505356	0	0	0	0	0	0	0	0	0	0	0	0	0	0	0	0	0	0	0.104291	0	0	0	0.010545	0	0	0	0	0	0	-0.00174125	0	0	0.00615596	0	0	0
470	CGTGATACAGCACACC.1_2	shGFPT2	0	1	1	0	0	0	0.0879287	0.0140042	-0.0600438	0	-0.042921	0	0	0	0	-0.00495521	0.00172432	0	0	0	0	0	-0.000975132	0.220808	0	0.0497701	0	0.00237468	0	0.114601	0	0.00317481	0.00393075	0	0	-0.0486584	0	0	0	-1.45314e-05	-0.000526281	0.00188525	0	0.00280256	0.0120489	0	0
471	CGTGATAGTCTGTGCG.1_2	shGFPT2	0	0	0	0	0	0.0406262	0	0	0	0	0	0	0	0	0	0	0	0	0	0	0	0	0	0	0	0	0	0	0	0	0	0.00801896	0	0	0	-0.161756	0	0	0	0	0	0.00444106	0	0	0	0	0
475	CGTTCTGAGTAACAGT.1_2	shGFPT2	0	0	0	0	0	0	0	0	-0.21742	0	0	0	0	0	0	0	0	0	0	-0.0660607	0	0.136497	0	0.213899	0	0	0	0	0	0	0	0.00873467	0.0108596	0	0	0	0	0	0	0	0	0	0	0	0	0	0
478	CTAACTTCAACAAGAT.1_2	shGFPT2	0	0	1	0	1	0.0120558	0	0.0234594	0	0	-0.0330357	0	0	0.131532	0	0	0	0	0	0	0	0	0	0.24985	0	0	0	0	0	0.134875	-0.00603403	0.00375149	0.00387765	0	0	0	0	0.0948339	0	0	0	0.00206118	0	0	0	0	0
479	CTAACTTCATCCTTCG.1_2	shGFPT2	0	1	0	0	0	0.0326183	0	0	0	0	-0.0254115	0	0	0	0	0	0	0.0608906	0	0	0	0	0	0	0	0	0	0.00606859	0	0.176133	0	0	0	0	0	-0.107368	0	0.144673	0	0	0	0.00317597	0	0.00716203	0	0	0
481	CTACAGAGTTCGGTCG.1_2	shGFPT2	1	1	0	0	0	0.0213705	0	0	0	0	0	0	0	0	0	0	0.00512029	0.0482552	0	-0.0418136	0	0	0	0.279792	0	0	0	0	0	0.0936009	-0.0067847	0.0042182	0	0	0	0	0	0.239808	0	0	-0.00222934	0.00184229	0	0	0	0	-0.01113
482	CTACAGATCTGGACTA.1_2	shGFPT2	1	0	1	0	1	0.0240646	0	0	-0.164992	0	0	0	0	0.132384	0	0	0.00576577	0	0	0	0	0	0	0.212749	0	0	0	0	0	0	0	0	0	0	0	0	0	0	0	0	0	0	0	0	0	0	0
484	CTACATTGTTAAGAAC.1_2	shGFPT2	0	1	1	0	1	0.00831533	0	0.02696	0	0	-0.0333366	0	0	0.0457442	0	-0.0115969	0	0	0.00615987	0	0	0	-0.000951872	0.11413	0	0	0	0	0	0	0	0	0	0	0	-0.0717273	0	0.0654103	0	0	-0.000608077	0.000716839	0	0.00323814	0.0139215	0	0
485	CTACATTTCTGTGCAA.1_2	shGFPT2	1	1	0	0	0	0.020529	0.112226	0	-0.100863	0	0	0	0	0.112934	0	0	0	0	0	0	0	0	0	0.223784	0	0	0	0	0	0.129219	0	0	0.00948929	0	0	-0.117467	0	0.161486	0	0	-0.00215745	0.00341716	0	0	0	0	0
488	CTACCTGGTAGGCAGT.1_2	shGFPT2	0	1	1	0	0	0.0208401	0	0	0	0	-0.0185977	0	0	0.0740469	0	0	0	0.0303934	0	0	0	0	0	0.209324	0	0	0	0	0	0.0912776	0	0.0041135	0	0.00897877	0	-0.0829763	0	0	0.00677009	-1.60049e-05	0	0.00374799	0	0	0.022535	0	0
496	CTATCTATCACGGAGA.1_2	shGFPT2	0	0	1	0	0	0	0	0	0	0	0	0	0	0	0	0	0	0	0	0	0	0	0	0.265828	0	0	0	0	0	0	0	0	0	0.0211024	0	0	0	0	0	0	0	0	0	0.0123191	0	0	0
497	CTCAACCCAGACCGCT.1_2	shGFPT2	0	0	0	0	1	0	0.153493	0	-0.187058	0	0	0	0	0	0	0	0	0	0	0	0	0	0	0.177881	0	0	0	0	0	0	0	0	0	0	0	0	0	0	0	0	0	0	0	0	0	0	0
503	CTCATCGGTAGATTGA.1_2	shGFPT2	0	0	0	0	0	0	0	0.0439217	0	0.0162375	0	0	0	0.208111	0	0	0	0	0	0	0	0	0	0	0	0.0919228	0	0	0	0.200149	-0.00716595	0	0.00725989	0	0	0	0	0	0	0	-0.00165058	0	0	0.0087897	0	0	0
504	CTCATCGGTGAGCGAT.1_2	shGFPT2	1	1	1	0	0	0.0262213	0	0	0	0	0	0	0	0	0	0	0	0	0	0	0	0	0	0.295547	0	0	0.042403	0	0	0.157724	0	0.00517566	0.00843384	0	0	0	0	0	0	0	0	0	0	0	0	0	0
507	CTCCAACCAGTAGTTC.1_2	shGFPT2	0	0	0	0	1	0	0	0	-0.155195	0	-0.0436439	0	0	0	0	0	0	0	0	0	0	0	0	0.265503	0	0	0	0	0	0	0	0.00623484	0.0101598	0	0	0	0	0	0	0	0	0.00361279	0	0	0	0	0
508	CTCCAACTCTCCACTG.1_2	shGFPT2	0	1	1	0	1	0	0	0	-0.073445	0	-0.0206542	0	0	0	0	0	0.00544747	0	0	-0.0444854	0	0	0	0.177633	0	0	0	0.00493247	0	0.065473	0	0.0029506	0.00731285	0	0	-0.0905253	0	0.117588	0	-1.77747e-05	0	0.00241712	0	0.0109187	0	0	0
510	CTCCACAGTACTGTTG.1_2	shGFPT2	1	1	1	0	0	0	0	0	0	0	0	0	0	0.0891767	0	-0.0120641	0	0	0	0	0	0	0	0.252864	0	0	0	0	0	0.148302	0	0.00587286	0.007819	0	0	-0.118466	0	0.127515	0	0	-0.0017777	0.00209567	0	0.00631263	0	0	0
528	CTGAGCGAGCACCGAA.1_2	shGFPT2	1	1	0	0	0	0	0	0	0	0	0	0.0260452	0	0	0	0	0	0	0	0	0	0	0	0.123588	0	0.093561	0	0	0	0.141632	0	0.00453464	0.00486885	0	0.0032039	-0.0602711	0	0	0.00981192	0	-0.000674024	0.00293468	0	0.00358931	0	0	0
534	CTGCATCCAGTCGGAA.1_2	shGFPT2	0	0	0	0	0	0	0	0.0257984	0	0	-0.0183182	0	0	0.113207	0	0	0.00317652	0	0	0	0	0	0	0.16258	0	0.0838073	0	0.00437461	0	0.112399	-0.0065333	0.0040619	0	0.0088438	0	0	0	0	0	0	0	0	0	0	0	0	0
536	CTGCATCTCCCTCTTT.1_2	shGFPT2	0	1	0	0	1	0	0.0379281	0	-0.0340879	0	-0.0294625	0	0	0.0859505	0	-0.0167872	0	0	0	0	-0.000545177	0	0	0.0749821	0	0	0	0	0	0.0303879	0	0.00308393	0.0038068	0.0046281	0	-0.062208	0	0.0545761	0	-1.40732e-05	-0.000507358	0.0013469	0	0.00460898	0	0	0
538	CTGCCATTCCGTGGTG.1_2	shGFPT2	0	0	0	0	0	0.0140708	0	0	0	0	0	0	0	0.0774059	0	0	0.0051809	0	0	0	0	0	0	0.136992	0	0	0	0	0	0.0616286	0	0.00277734	0.006955	0.00938608	0.00297811	0	0	0	0.0070772	-3.18871e-05	0	0.001213	0	0.0054794	0	0	0
543	CTGCGAGGTAGCACGA.1_2	shGFPT2	0	0	0	0	0	0	0	0	0	0	0	0	0	0.167194	0	0	0	0	0	0	0	0	0	0.326268	0	0	0	0	0	0.133116	0	0.00926156	0	0	0	-0.161694	0	0	0	0	0	0.00262003	0	0	0	0	0
544	CTGCTCACATGCAGCC.1_2	shGFPT2	1	1	0	0	0	0	0.0559194	0.0321932	-0.10379	0	-0.0382484	0.0363465	0	0	0	0	0	0.0230975	0	0	0	0	0	0.104812	0	0	0	0.00337523	0	0.121246	-0.00324752	0.00416968	0.00679456	0.00682345	0.00216501	0	0	0	0	0	-0.000748025	0.00142622	0	0.00398338	0	0	0
545	CTGGACGAGACTAAGT.1_2	shGFPT2	0	0	0	0	0	0	0	0	0	0	-0.0475131	0	0	0	0	0	0	0	0	0	0	0	0	0.284588	0	0	0	0	0	0.150615	-0.0109174	0	0	0	0	0	0	0	0	0	-0.00251468	0	0	0.017493	0	0	0
547	CTGGCAGGTATCCTCC.1_2	shGFPT2	1	0	1	0	0	0	0	0	0	0	-0.0440076	0	0	0	0	0	0	0	0	0	0	0	0	0.336742	0	0	0	0	0	0.139503	0	0	0.0102445	0	0	0	0	0	0.01602	0	0	0	0	0	0	0	0
548	CTGGTCTAGAAGTATC.1_2	shGFPT2	0	1	0	0	0	0	0	0	-0.16265	0	0	0	0	0	0	0	0	0	0	0	0	0	0	0	0	0	0	0	0	0.144996	0	0.00653436	0	0	0	0	0	0	0	0	0	0.00285386	0	0	0	0	0
549	CTGGTCTCAAGTGGAC.1_2	shGFPT2	1	0	0	0	1	0	0	0	-0.0389019	0	-0.0355012	0	0	0.113364	0	-0.0083556	0.00189708	0	0	0	-0.000600329	0	-0.000773161	0.16278	0	0	0	0	0.01995	0.129621	-0.00251375	0.00406753	0.0025467	0	0.00167583	-0.0528747	0	0	0	-1.57906e-05	-0.00057901	0.00177648	0	0.00517141	0	0	0
551	CTGTATTCATTGCAAC.1_2	shGFPT2	0	0	0	0	1	0	0.0865497	0	0	0	0	0.0272403	0	0	-0.0122055	0	0.00379332	0	0	-0.0309772	0	0	0	0	0	0	0	0.00522404	0	0.0693433	-0.00502638	0.00470584	0.0140829	0.0159035	0	0	0	0	0	-1.88254e-05	-0.00243713	0	0	0.00616531	0	0	0
560	CTTCGGTCACTTTAGG.1_2	shGFPT2	1	1	0	0	0	0.0120468	0.0658564	0.0234419	0	0.00866626	-0.056693	0.0326808	0	0.10449	0	0	0	0	0	0	0	0	0	0.120334	0	0	0	0.00397502	0	0.0527639	-0.00603024	0.00546506	0.00890542	0.0159403	0.00254974	-0.0479653	0	0	0	0	-0.00202471	0	0	0.00930563	0	0	0
565	CTTTCAAAGGAAAGGT.1_2	shGFPT2	1	0	1	0	1	0.0240768	0.131621	0	0	0	0	0	0	0	0	0	0.0057687	0	0	0	0	0	0	0.251111	0	0	0	0	0	0.105454	0	0	0	0	0	0	0	0.189394	0	-2.86288e-05	0	0.00207559	0	0.00937592	0	0	0
566	CTTTCAAAGTTCACTG.1_2	shGFPT2	1	1	1	0	0	0.0124296	0	0.0142785	-0.0802467	0	-0.022567	0	0	0.0683776	0	-0.00503982	0	0	0	0	-0.000213763	0	-0.00118087	0.154968	0	0.0506199	0	0	0	0.0715365	-0.00232958	0.00322385	0.00236012	0	0	-0.0494893	0	0.0577203	0	-8.72501e-06	-0.00119438	0.00191053	0	0.00759318	0	0	0
567	CTTTCAAGTAGATCCT.1_2	shGFPT2	0	0	0	0	1	0	0	0	-0.122531	0	-0.034458	0	0	0.137194	0	0	0	0	0	0	0	0	0	0.219019	0	0	0	0	0	0.178076	0	0.0068238	0	0	0	0	0	0	0	0	0	0.00214992	0	0	0	0	0
570	CTTTCGGGTAAGTTGA.1_2	shGFPT2	0	1	0	0	1	0	0	0	-0.161265	0	-0.0256313	0	0	0	0	-0.0133087	0.00444468	0	0	0	0	0	0	0.172049	0	0	0	0	0.0684258	0.118946	0	0.0053604	0	0	0	0	0	0.145924	0.0136593	0	0	0	0	0.0105755	0	0	0
572	GAAACCTGTACAAACA.1_2	shGFPT2	0	0	0	0	1	0.0242785	0	0	0	0	-0.0335453	0	0	0.133561	0	0	0.00581702	0	0	0	0	0	0	0.214287	0	0	0	0	0	0.106338	0	0.00479219	0	0	0.00513861	0	0	0.19098	0	0	0	0.00343761	0	0.00945447	0	0	0
574	GAACACTGTAATTAGG.1_2	shGFPT2	0	0	0	0	1	0.0438358	0	0	-0.215374	0	0	0	0	0	0	0	0	0	0	0	0	0	0	0.277713	0	0	0	0	0	0.146179	0	0.00658768	0.0107347	0	0	-0.174535	0	0.395173	0	-3.96848e-05	-0.00244062	0.00377894	0	0	0	0	0
576	GAACGTTAGATGCTGG.1_2	shGFPT2	0	0	1	0	0	0	0	0	0	0	0	0	0.0170198	0	0	0	0	0	0	0	0	0	0	0.279211	0	0	0	0	0	0.105454	0	0	0	0	0	0	0	0.264268	0	0	0	0.00475064	0	0	0	0	0
577	GAACTGTGTCGTGGAA.1_2	shGFPT2	0	1	1	0	0	0	0.177114	0.0448097	0	0	-0.0318172	0	0	0	0	0	0.00551735	0	0	0	0	0	0	0.145888	0	0.0937813	0.0372387	0	0	0.100859	-0.0121852	0.00454531	0	0.015361	0	0	0	0.254856	0	0	-0.00168396	0	0	0	0	0	0
579	GAAGCCCTCGTCTCAC.1_2	shGFPT2	0	0	1	0	0	0	0	0	0	0	0	0	0	0	0	0	0	0	0	0	0	0	0	0.252332	0	0	0	0	0	0.129982	0	0.00910254	0	0	0	0	0	0	0	0	0	0.00436909	0	0	0	0	0
582	GAAGGACTCTCGGGAC.1_2	shGFPT2	0	0	0	0	0	0	0.172981	0	-0.206199	0	0	0	0	0	0	0	0	0	0	0	0	0	0	0	0	0	0	0	0	0	0	0	0	0	0	0	0	0	0	0	-0.00231394	0	0	0	0	0	0
583	GAAGGGTAGCTTCATG.1_2	shGFPT2	0	0	0	0	0	0	0	0	0	0	0	0	0	0	0	0	0	0.0772071	0	0	0	0	0	0.283264	0	0	0	0	0	0	0	0	0	0	0	0	0	0	0	0	0	0.00385447	0	0	0	0	0
587	GACACGCGTACAGTAA.1_2	shGFPT2	0	1	0	0	0	0	0.23953	0	0	0	0	0	0	0.241041	0	0	0	0	0	0	0	0	0	0.347439	0	0	0	0	0	0	0	0	0	0	0	0	0	0	0	0	0	0.00377726	0	0	0	0	0
588	GACACGCGTATCTCGA.1_2	shGFPT2	1	1	0	0	0	0.026937	0.147257	0	-0.180848	0	-0.0372185	0	0	0	0	0	0.00645399	0	0	0	0	0	0	0.233194	0	0	0	0	0	0.117981	0	0.00726544	0	0	0	-0.189113	0	0	0	-3.20297e-05	0	0.00232215	0	0	0	0	0
593	GACCAATTCACTACGA.1_2	shGFPT2	1	1	0	0	0	0	0	0	-0.200105	0	0	0	0	0	0	0	0	0	0	0	0	0	0	0.193229	0	0	0	0	0	0.133588	0	0	0.00981012	0	0	-0.121439	0	0	0	0	0	0	0	0	0	0	0
594	GACCCAGAGACAACTA.1_2	shGFPT2	1	0	0	0	0	0.0291299	0	0	0	0	0	0	0	0	0	0	0.0069794	0	0	0	0	0	0	0	0	0	0	0	0	0	0	0.00987955	0	0	0	0	0	0	0	0	0	0.00431486	0	0	0	0	0
595	GACCCAGAGCCTCACG.1_2	shGFPT2	0	0	0	0	0	0.0377962	0	0	-0.1857	0	0	0	0	0	0	0	0	0	0	0	0	0	0	0.239451	0	0	0	0	0	0.212607	0	0.00746036	0	0	0	0	0	0	0	0	0	0	0	0	0	0	0
596	GACCCAGTCAGTGCGC.1_2	shGFPT2	1	0	0	0	0	0	0.0549009	0.031694	-0.0800242	0	-0.0287824	0.0172793	0	0.0552472	0	-0.00407204	0.0024062	0	0	0	0	0	-0.000447805	0.131973	0	0.0408995	0	0	0	0.119794	0	0.00198228	0	0.0108648	0.00212558	0	0	0	0	-1.19415e-05	-0.0007344	0.0014041	0	0.00391083	0	0	-0.00523036
597	GACCCTTAGTCCTGTA.1_2	shGFPT2	1	1	1	0	1	0.0283455	0	0	0	0	0	0	0	0	0	0	0	0	0	-0.0750707	0	0	0	0.311347	0	0	0	0	0	0	0	0	0.0123407	0	0	0	0	0.386583	0	0	0	0.00384526	0	0.0110382	0	0	0
599	GACCCTTGTAGGCAGT.1_2	shGFPT2	0	0	0	0	0	0	0	0	-0.117057	0	-0.0329189	0	0	0	0	0	0	0.0357205	0	0	0	0	0	0.10022	0	0	0	0	0	0.128011	0	0	0	0	0	0	0	0	0	0	-0.00115682	0.00251956	0	0	0	0	0
600	GACCCTTTCGTAGCTA.1_2	shGFPT2	1	1	0	0	0	0	0.0819134	0.0291574	0	0	-0.0443736	0	0	0.0824301	0	0	0.00359012	0	0	0	0	0	0	0.224034	0	0.0610231	0	0	0	0.0997778	-0.0120907	0.00449657	0.00481949	0.00999531	0	0	0	0	0.0114581	0	0	0	0	0.00583505	0	0	0
602	GACGCTGGTTTACCAG.1_2	shGFPT2	0	1	1	0	1	0.0244757	0	0	-0.120254	0	0	0	0	0	0	0	0.00586428	0	0	0	0	0	0	0	0	0	0	0	0	0	0	0.00483112	0	0	0	-0.0974518	0	0	0	0	-0.00248981	0.00210998	0	0.00953127	0	0	0
604	GACGTTAGTGGAATGC.1_2	shGFPT2	0	0	0	0	0	0	0	0	0	0	0	0	0	0	0	0	0	0	0	0	0	0	0	0	0	0	0	0	0	0	0	0	0	0	0.00572618	0	0	0	0	0	-0.00197843	0	0	0	0	0	0
607	GACTCTCTCCGTACGG.1_2	shGFPT2	0	0	0	0	0	0	0.112164	0	0	0	-0.028349	0	0	0.112871	0	0	0	0	0	-0.0401448	0	0	0	0	0	0	0	0	0	0.129161	0	0	0.00659932	0	0	-0.0816925	0	0	0	-3.50648e-05	0	0	0	0.00798993	0	0	0
609	GACTGATTCATGAAAG.1_2	shGFPT2	0	1	1	0	1	0.0185507	0.101411	0	0	0	-0.0256313	0	0	0	0	0	0.00887782	0	0	0	0	0	0	0.207943	0	0	0	0	0	0	0	0.00366162	0	0	0	0	0	0	0	0	-0.00295659	0.00234114	0	0	0	0	0
610	GACTTCCTCCGTGGCA.1_2	shGFPT2	0	1	1	0	0	0.0164469	0	0	0	0	-0.0227245	0	0	0.0904775	0	0	0.00394061	0	0	-0.03218	0	0	0	0.237553	0	0	0	0	0	0.149748	0	0	0	0	0	0	0	0	0.00827234	0	-0.00120272	0.00212081	0	0.00958023	0	0	0
613	GAGACTTCAGACGGAT.1_2	shGFPT2	1	0	0	0	0	0	0.0865147	0.0188933	0	0.00698469	-0.0484136	0	0	0.16083	0	0	0	0	0	0	0	0.0392528	0	0.15099	0	0.0826784	0	0.00320372	0	0.137531	-0.00644529	0.00400718	0.0050902	0.00647671	0	0	0	0.0763755	0	-1.15449e-05	-0.000710014	0.00175013	0	0.00378097	0	0	0
614	GAGAGGTAGACAAGCC.1_2	shGFPT2	0	1	1	0	1	0.0062059	0	0	0	0	-0.0148243	0	0	0.0341398	0	-0.00698517	0	0	0	0	-0.00018079	0	-0.00106255	0.0679722	0	0	0.0173503	0.00204773	0	0.0271813	0	0.0034004	0	0	0	-0.0247092	0	0.0843975	0	0	-0.00045382	0.000534992	0	0	0	0	0
617	GAGCCTGTCTCGCAGG.1_2	shGFPT2	1	0	1	0	1	0.0189929	0.0658515	0	0	0	-0.0425254	0	0	0.131451	0	0	0.00288615	0	0	0	0	0	0	0.1754	0	0.0490574	0.0194797	0	0	0.202637	-0.00382433	0.00471648	0.00387446	0	0	0	0	0	0	-1.43233e-05	-0.000880885	0.00163732	0	0.00469089	0	0	0
618	GAGGCAACAGTTTCAG.1_2	shGFPT2	0	0	1	0	0	0	0	0	-0.168352	0	0	0	0	0	0	0	0	0	0	0	0	0	0	0	0	0	0	0	0	0	0	0.00676341	0.0110211	0	0	-0.0982178	0	0	0	0	0	0	0	0	0	0	0
622	GAGGGATGTCTATGAC.1_2	shGFPT2	0	1	0	0	1	0	0.0942453	0	-0.0847029	0	-0.0353337	0	0	0.171197	0	0	0	0	0	0	0	0	-0.000768722	0.10922	0	0.0702099	0.027879	0.00568854	0	0	-0.0054733	0.0061426	0	0.023537	0	0	0	0	0	0	-0.00187007	0.00268276	0	0.0067135	0	0	0
626	GAGTCATAGATCCTAC.1_2	shGFPT2	0	0	0	0	0	0	0	0	0	0.0263653	-0.0506387	0	0	0	0	0	0	0	0	0	0	0	0	0	0	0	0	0	0	0	0	0	0	0	0	0	0	0	0	0	0	0	0	0	0	0	0
629	GAGTCTACACACCTTC.1_2	shGFPT2	1	0	0	0	1	0.018736	0	0	-0.162432	0	0	0	0	0	0	0	0	0	0	0	0	0	0	0	0	0	0	0	0.0832994	0.0820617	0	0.00540419	0	0	0	-0.109012	0	0	0	0	-0.00137011	0	0	0	0	0	0
635	GAGTTGTGTATCCTTT.1_2	shGFPT2	0	1	0	0	0	0	0	0	0	0	-0.0548393	0	0	0	0	0	0	0	0	-0.0578163	0	0	0	0.187205	0	0	0	0	0	0	0	0	0	0	0	0	0	0	0	0	0	0	0	0	0	0	0
636	GAGTTTGCATCCTTGC.1_2	shGFPT2	0	0	0	0	0	0	0	0	0	0	-0.0378561	0	0	0	0	0	0.00894195	0	0	0	0	0	0	0.173578	0	0	0	0.0090405	0	0	0	0	0.00881245	0	0.00579895	0	0	0	0	0	0	0	0	0	0	0	0
[truncated: 248 more rows]
[truncated: 21 more columns]

## Sheet: Table S7D
Gene name	Weight
Actl6a	0.01515
Asf1b	0.1148
Atad2	0.11404
Cbx1	0.04208
[truncated: 23 more rows]

[truncated: 2 more sheets: Table S7E, Table S7F]
