# Supplementary material for: GFPT2 controls immune evasion in EGFR-mutated non-small cell lung cancer
Source: Research Square preprint supplement (doi:10.21203/rs.3.rs-4203208/v1), 2024-04-26
Supplement: Supplementary file 7 [file 67f4da368729b9b7a07bc6d0.docx]

**Supplementary Methods**

**Cell lines and cell culture**

All cell lines utilized were sourced from the Cell bank of Chinese Academy of Sciences (Shanghai, China). Human NSCLC cell lines encompassing H1975 (EGFR T790M/L858R), HCC827 (EGFR Del19), PC9 (EGFR Del19), and H1299 (EGFR WT), alongside lymphocytes Jurkat T were cultured in RPMI 1640, enriched with 10 % fetal bovine serum (FBS), 100 U/mL penicillin and 100 μg/mL streptomycin. The mouse progenitor B cell line, BaF3, was cultured in RPMI 1640 supplemented with 10 % FBS, 1 % antibiotic mixture, and 15 ng/mL IL-3. The mouse cancer cell line LLC and human umbilical vein endothelial cell (HUVEC) were cultured in DMEM containing 10 % FBS and a 1 % antibiotic mixture. All aforementioned cell lines were incubated at 37 °C with a 5 % CO2-humidified atmosphere.

To establish EGFR TKI-resistant sublines, parental PC9 cells were subjected to two distinct Osimertinib adaptation protocols. The first regimen involved a stepwise adaptation of PC9 cells to increasing Osimertinib concentrations, ranging from 10 to 500 nM over a span of six months, leading to the PC9/OR1 cell line. In the second regimen, cells were initially exposed to 10 nM Osimertinib for two weeks, followed by prolonged culture in 50 nM Osimertinib for an additional six months, generating the PC9/OR2 cell line. For resistance validation, PC9, PC9/OR1 and PC9/OR2 cells were seeded at 10,000 cells/well in 96-well plates, and challenged with Osimertinib concentrations of 10, 100, 1000 and 5000 nM for 48 hours, followed by cytotoxicity assessment via a Cell Counting Kit-8.

To establish EGFR-mutated murine cell line, LLC cells (designated as EGFR-mutated LLC) were engineered to stably overexpress the EGFR T790M/L858R mutation via retroviral transduction using a pLenti-GIII-CMV-CBH-GFO-2A-Puro vector. Specifically, LLC cells were allocated at a density of 2 × 105 cells per well in a 6-well plate and, following a 24 h incubation, were transduced with high-titer lentivirus at a specified multiplicity of infection (MOI = 20) in complete medium. Subsequently, cells exposed to the pertinent lentivirus were subjected to a selection pressure using 4 µg/mL puromycin (Beyotime, Nanjing, China) over a 2 - 4 day period, prior to being enlisted for subsequent bioassays. The resultant EGFR-mutated LLC cells were then characterized based on various markers: increased EGFR phosphorylation, upregulated GFPT2 expression, enhanced glycosylation of immune suppressive ligands (PD-L1, CD276, PVR, CD73), and elevated secretion of CXCL10 and VEGF. Collectively, these traits confirmed the cell line's ability to mimic the immunosuppressive phenotype observed in spontaneously EGFR-mutated human NSCLC cells.

**Plasmid transfections, viral infections and RNA interference**

For suspension-cultured cell BaF3, 7 × 107 cells were suspended with 100 μl PBS solution in electric shock cups and transfected with 1 μg/μl plasmid (10 μl per cup, 0.1 μg/μlfinal) under 500 μF, 500 ω, and 160 V conditions provided by Gene importer (SCIENTZ-2C, Ningbo China). Cells were incubated on the ice for 10 min post electric shock and then seeded into a 6-well plate with complete medium. The transfected cells were used in following bioassays 2 - 4 days post-transfection. BaF3 cells upon the introduction of oncogenic EGFR-mutated forms were constructed. pcDNA3.1-EGFR WT, pcDNA3.1-EGFR T790M, pcDNA3.1-EGFR L858R, pcDNA3.1-EGFR Del19, pcDNA3.1-EGFR T790M/L858R, and pcDNA3.1-EGFR T790M/Del19 used here were purchased from Nanjing Jinbeijin Biotechnology Co., Ltd. (Nanjing, China).

For adherent cells, parental cells were seeded at 5 × 105 cells per well into a 6-well plate and transfected after 24 hours with 1 μg/μl plasmid (1 μl per well, 0.5 pg/μl final) using lipofectamine 3000 (Invitrogen, L3000015) (2.5 μl per well) in serum-free medium. The medium was replaced with fresh complete medium at 6 hours post-transfection. The transfected cells were then harvested and used in following bioassays 2 - 4 days post-transfection. Overexpressing-GFPT2, GFPT2 promoter containing Dual-Luciferase H1299 cells and other overexpressing cells were constructed as the method described above. pEGFP-N1-GFPT1，pEGFP-N1-GFPT2, pGL4.10-Luciferase-GFPT2-Promoter, pGL4.10-Luciferase-GFPT2-Prom1, pGL4.10-Luciferase-GFPT2-Prom1 Mut, pcDNA3.1-Flag-N1-EGFR T790M/L858R/N352Q, pcDNA3.1-Flag-N1-EGFR T790M/L858R/N361Q and pcDNA3.1-Flag-N1-EGFR T790M/L858R/N614Q used here were purchased from Nanjing Jinbeijin Biotechnology Co., Ltd. (Nanjing, China).

Parental cells were seeded at 5 × 105 cells per well into a 6-well plate and transfected after 24 hours with 20 μM siRNA (2 μl per well, 40 pmol final) using lipofectamine RNAiMAX (Invitrogen, 13778150) (5 μl per well) in serum-free medium. The medium was replaced with fresh complete medium at 6 hours post-transfection. The transfected cells were then harvested and used in following bioassays 2 - 4 days post-transfection. The sequences of siRNA targeting GFPT2, GFPT1 and Xbp1s was UCCACUUUUAAGUCCAUGC (siGFPT2), UUCGAAGUCAUAGCCUUUG (siGFPT1), UCUGAAGAGUCAAUACCGCTT (siXbp1s), respectively.

pLenti-GIII-CMV-CBH-GFO-2A-Puro EGFR T790M/L858R and pLVX-shGFPT2-zsGreen-PGK-Puro were purchased from Nanjing Jinbeijin Biotechnology Co., Ltd (Nanjing, China). The sequence of shGFPT2 was UCCACUUUUAAGUCCAUGC. pLenti-CMV-hU6-shEGFR-CBH-gcGFP-Puro was purchased from Shanghai GK Gene Medical Technology Co., Ltd (Shanghai, China) and the sequence of shEGFR was GCGAUACUCUACCUCCUUCU. Parental cells were seeded at 2 × 105 cells per well into a 6-well plate and infected after 24 hours with high-titer lentivirus in complete medium at the volume determined by specific multiplicity of infection (MOI). Cells infected with the indicated lentivirus were treated with puromycin (ST551, Beyotime) for 2 - 4 days and then used in following bioassays. The MOI of H1975, HCC827 and LLC was 50, 20 and 20, respectively and the concentration of puromycin was 2, 1 and 4 μg/ml, respectively. Stable overexpressing-EGFR T790M/L858R LLC cells (EGFR-mutated LLC), stable knockdown-GFPT2 H1975 (shGFPT2 H1975) and PC9OR2 (shGFPT2 PC9OR2) were established as the method described above.

**Bulk RNA-seq**

Total RNA was extracted from H1975 cells treated with Alm, EGF, and EGFR-knockdown using TRIzol® (Magen). Libraries for paired-end sequencing were prepared with the ABclonal mRNA-seq Lib Prep Kit, starting from 1 μg of total RNA, with mRNA isolated using oligo(dT) magnetic beads. Fragmentation and cDNA synthesis were performed according to the ABclonal protocol, followed by adapter ligation and PCR amplification. Libraries were purified using the AMPure XP system and quality-checked on an Agilent Bioanalyzer 4150. Sequencing on the Illumina NovaSeq 6000 platform produced 150 bp paired-end reads. Clean reads were aligned to the Homo sapiens genome via HISAT2 (<http://daehwankimlab.github.io/hisat2/>), with gene read counts determined by Feature Counts and normalization to FPKM values. Differential expression analysis used DESeq2 (<http://bioconductor.org/packages/release/bioc/html/DESeq2.html>), identifying significant genes with | log2FC | > 1 and Padj < 0.05. Functional insights from differentially expressed genes were gained through GO enrichment analysis with the clusterProfiler package.

**Non-targeted metabolomics analysis**

In the clinical sample assay, tissues weighing 0.1 g from patients were homogenized in 1 ml of 80 % (v/v) methanol, incorporating 1 μg/mlchlorophenylalanine as the internal standard (IS). For the cell line assay, BaF3 cells expressing multiple EGFR mutation variants were thrice rinsed with cold PBS and then collected. These cells were permeabilized in 1 ml of 80 % (v/v) methanol containing 1 μg/ml chlorophenylalanine as IS. For tumor TIF assay, 10 μl of TIF was permeabilized in a similar methanol-IS mixture. Following permeabilization, the tissue homogenates, cell lysates and TIF underwent centrifugation at 18,000 rpm for 5 minutes at 4 °C. The subsequent supernatants were carefully evaporated to dryness. These dried samples were then reconstituted in 100 μl of HPLC-grade water and centrifuged again under identical conditions. The resulting supernatants were then readied for subsequent analyses.

Metabolite analysis was performed using a Shimadzu LC-30A LC system (Kyoto, Japan) coupled with a TripleTOF 5600 system (AB SCIEX, Foster City, CA, USA). Chromatographic separation occurred on an Amide XBridge HPLC column (3.5 µm, 4.6 mm i.d. × 100 mm length; Waters, cat. no. 186004868) at 40 °C. The mobile phase comprised solvent A (95 % dd H2O and 5 % acetonitrile, supplemented with 5 mM ammonium acetate; pH 9 adjusted to 9 with 10 % (v/v) ammonia) and solvent B (pure acetonitrile). The elution flow rate was set at 0.4 ml/ min. Gradient elution unfolded as follows: 0 - 3 min, 85 % B; 3 - 6 min, 85 - 30 % B; 6 - 15 min, 30 - 2 % B; 15 - 18 min, 2 % B; 18 - 19 min, 2 - 85 % B; 19 - 26 min, 85 % B. The DuoSpray ion source, operating in electrospray ionization (ESI) mode and utilizing a negative ion mode for scanning, facilitated ionization of the metabolites. Mass spectrometry (MS) parameters were defined as follows: a time-of-flight MS scan ranging from m/z 50 - 1000 Da; ion source gas 1 and 2 set at 33 psi; a curtain gas at 25 psi; source temperature, 500 °C; ion spray voltage floating, -4500 V; declustering potential (DP), -93 V; and collision energy (CE), -10 V. The product ion scan ranged from m/z 50 - 1000 Da, maintaining a temperature of 500 °C and employing a Collision Energy Spread (CES) of 20, Ion Release Delay (IRD) of 67, and Ion Release Width (IRW) of 25. Calibration of accurate mass was facilitated by the Calibration Delivery System (AB SCIEX), with automatic recalibration occurring every five samples.

**Quantification of HBP metabolites and Adenosine using MS**

Cells were subjected to washing with cold PBS, followed by three freeze-thaw cycles in 300 μl HPLC-grade water. Tissue samples underwent homogenization in 300 μl HPLC-grade water using a homogenizer. Both Plasma and TIF were diluted to predetermined ratios. Cell lysates and tissue homogenate (200 μl) or diluted plasma and TIF (30 μl) were precipitated using a solution comprising a four-fold volume of methanol and IS (5 μg/ml 13C-Glutamine for metabolites within HBP and 1 μg/ml chlorophenylalanine for Adenosine). Centrifugation was performed at 18,000 rpm for 10 min at 4 °C, post which, the supernatants were evaporated to dryness. The residues were reconstituted with 100 μl HPLC-grade water and underwent another centrifugation at 18,000 rpm for 5 min at 4 °C. The resultant supernatants were then prepared for analysis.

Metabolites within HBP were analyzed using a Shimadzu LC-30A liquid chromatography (LC) system (Kyoto, Japan) interfaced with a QTRAP 5500 system (AB SCIEX, Foster City, CA, USA). Chromatographic separation was achieved using an XSelect® HSS T3 (3.5 µm, 4.6 mm i.d. × 150 mm length, Waters, USA) at a maintained temperature of 40 °C. The mobile phase comprised solvent A (5 % acetonitrile and 5 mM ammonium acetate) and solvent B (acetonitrile), run at a flow rate of 0.5 ml/min. The gradient elution was programmed as follows:1 - 5 min, 5 % B; 5.5 min, 90 % B; 7.5 min, 90 % B; 8 min, 5 % B; 10 min, 5 % B. The mass spectrometer was operated in negative electrospray ionization (ESI) mode with a 4.5 kV capillary voltage. The multiple rection monitoring (MRM) parameters were set as follows: declustering potential set at -50 V for fructose-6P and glucosamine-6P, -90 V for UDP-GlcNAc, -60 V for 13C-glutamine (IS), -55 V for glutamine and -50 V for GlcNAc-1P; collision energy set at -18 eV for fructose-6P, -25 eV for glucosamine-6P, -39 eV for UDP-GlcNAc, -14 eV for 13C-glutamine (IS), -14 eV for glutamine and -20 eV for GlcNAc-1P. MRM transition set as m/z 259.2 → 97 for fructose-6P, m/z 258.1 → 96.7 for glucosamine-6P, m/z 606.5 → 358.3 for UDP-GlcNAc, m/z 150.2 → 131.9 for 13C-glutamine (IS), m/z 145.1 → 127.1 for glutamine and m/z 300.3 → 97.2 for GlcNAc-1P.

Adenosine quantification was performed using a Shimadzu LC-30A LC system (Kyoto, Japan) interfaced with a QTRAP 6500 system (AB SCIEX, Foster City, CA, USA). Chromatographic separation was achieved using an Amide XBridge HPLC column (3.5 µm, 4.6 mm i.d. × 100 mm, Waters, cat. no. 186004868) at 40 °C. The mobile phase encompassed solvent A (5 % acetonitrile and 5 mM ammonium acetate) and solvent B (pure acetonitrile), delivered at a flow rate of 0.4 ml/min. The gradient elution program was: 1 - 2 min, 85 % B; 5 min, 20 % B; 8 min, 20 % B; 10 min, 85 % B; 16 min, 85 % B. For the mass spectrometric analysis, negative electrospray ionization (ESI) was utilized with a capillary voltage of 4.5 kV. The MRM parameters were set as follows: declustering potential set at -40 V for adenosine and chlorophenylalanine (IS); collision energy set at -20 eV for adenosine and -16 eV for chlorophenylalanine (IS). MRM transition set as m/z 268.4 → 136 for adenosine, m/z 200 → 154 for chlorophenylalanine (IS).

**Western blotting**

**﻿**Whole-cell lysates were prepared from cultured cells using NP40 Lysis Buffer and from tumor samples using RIPA Lysis Buffer. Specifically, cultured cells were rinsed thrice with cold PBS, followed by lysis on ice using NP40 buffer containing 100 μM Phenylmethanesulfonylfluoride and 0.1 % (v/v) phosphatase inhibitor (Beyotime Biotechnology, China) for 30 min. Tumor samples were homogenized in RIPA buffer supplemented with inhibitors and incubated on ice for 40 min. Post lysis, protein supernatants were acquired via centrifugation at 14,000 g for 5 min at 4 °C. Surface and cytoplasmic proteins were isolated using the Surface and Cytoplasmic Protein Reagent Kit (P0033, Beyotime, Shanghai, China), following the provided manufacturer’s protocol. In summary, cells and tumor samples were suspended and lysed in 1 ml of Isolation Solution A, supplemented with 1 % PMSF, and then homogenized on ice. The resulting lysates were centrifuged at 700 g for 10 min to remove nuclear. The collected supernatants were further centrifuged at 14,000 g for 30 min. The pellets were resuspended in Extraction Buffer B and lysed for an additional 20 min. Following a final centrifugation at 14,000 g for 5 min, the supernatant was designated as the membranous protein lysate. All protein samples had their concentrations assessed using the bicinchoninic acid (BCA) Protein Assay kit (Beyotime Biotechnology, China). These samples were denatured at ﻿100 °C in 4 × XT Sample Buffer (Bio-Rad, USA). N-glycosylation modification of proteins was assessed using the PNGase F Glycan Cleavage Kit (A39245, Gibco, USA). In brief, protein lysates were standardized to a concentration of 5 μg/μl. A volume of 20 μl of this lysate was mixed with 4.5 μl of 10 × Glycoprotein Denaturing Buffer, 18.5 μl of ultrapure water, and 2 μl of PNGase F, achieving a total reaction volume of 45 μl. This blend was then incubated at 50 °C for 1 h to facilitate the removal of N-linked oligosaccharides. Subsequently, 15 μl of the loading buffer was incorporated and the mixture was denatured by heating at 100 °C for 5 min.

Protein lysates (30 - 50 mg) were loaded onto 4 - 12 % Omni-PAGE™ Hepes Plus gels (Epizyme Biomedical Technology, China). After separation, protein was transferred to a PVDF membrane (Bio-Rad). Membranes were blocked in 5 % skim milk in TBST (50 mM Tris–HCl, 150  mM NaCl, 0.05 % Tween 20) for 2 hours at room temperature, followed by an overnight incubation 4 °C with primary antibodies (See below). After three washes with TBST, membranes were incubated with HRP-conjugated secondary antibodies (1:10000 dilution) for 2 hours at room temperature. Following another three washes, blots visualization was achieved using an enhanced chemiluminescence detection kit (Bio-Rad, USA) and images were captured using a ChemiDoc XRS-System (Bio-Rad, USA). Signal intensities were normalized to GAPDH or Actin. The intensity of the selected band was analyzed using ImageJ. The following antibodies were used: anti-GFPT1 (ab125069), anti-GFPT2 (ab190966), anti-EGFR (ab52894), anti-pEGFR (phosphoY1068, ab40815), anti-ERK (ab184699), anti-pERK (phospho T202 for ERK1 and phospho T185 for ERK2, ab201015), anti-AKT (ab179463), anti-pAKT (phospho T308, ab38449), anti-pIRE1α (ab124945), anti-Xbp1s (ab220783), anti-PD-L1(ab213524), anti-CD276 (ab134161), anti-PVR (ab103630), anti-CD73 (ab133582), anti-Na+/K+ ATPase (ab76020, 1:10000) ﻿(others were used at 1:1,000 and all from Abcam); anti-IRE1α (3294) ﻿(was used at 1:1,000 and from ﻿Cell Signaling Technology); anti-Actin (AP0731), anti-GAPDH (AP0063) (both were used at 1:1,000 and from Bioworld); Goat pAb to Rabbit IgG HRP (ab6721), Goat pAb to Mouse IgG HRP (ab205719) (both were used at 1:10,000 and from Abcam).

**RNA isolation and RT-qPCR**

For the isolation and purification of RNA from diverse cell types and tumor specimens, the RNA Isolation Kit (RNAiso Plus, Takara, Japan) was employed, followed by reverse transcription into cDNA utilizing the PrimeScript RT Regent Kit (Vazyme, Nanjing, China) in alignment with the guidelines provided by the manufacturer. Real-Time Quantitative Polymerase Chain Reaction (RT-qPCR) assays were conducted on the CFX96 real-time detection system (Bio-Rad, USA) with the SYBR Green PCR Mix (Bio-Rad, USA). The primers for detection are listed below: *GFPT2-*F ATGTGCGGAATCTTTGCCTAC, *GFPT2-*R ATCGAGAGCCTTGACTTTCCC; *CXCL10*-F GAAATTATTCCTGCAAGCCAATTT, *CXCL10*-R TCACCCTTCTTTTTCATTGTAGCA; *VEGF*-F CGACGGCTTGGGGAGATTGC, *VEGF*-R GGGCGGTGTCTGTCTGTCTG; *ACTIN-F* GCGTGACATTAAGGAGAAG, *ACTIN-R* GAAGGAAGGCTGGAAGAG. PCR cycling parameters were set to an initial denaturation at 95 °C for 10 min, subsequently followed by 40 cycles of 95 °C for 15 s, annealing at 60 °C for 30 s, and an extension phase at 72 °C for 30 s. To confirm the specificity of the PCR products, a melting curve analysis was consistently performed post amplification. The *ACTIN* served as the internal reference. Quantitative evaluations of target gene mRNA expression were derived utilizing the 2−ΔΔCt methodology, where cycle threshold (Ct) values were normalized to *ACTIN*.

**Chromatin Immunoprecipitation**

Chromatin immunoprecipitation (ChIP) assay was conducted using the Pierce™ Magna ChIP assay kit (26157, ThermoFisher) as per the manufacturer’s instructions. Briefly, 1 × 107 cells were subjected to cross-linking using 1 % formaldehyde (w/v) for a duration spanning10 - 15 min, followed by the addition of 0.125 M glycine to terminate the cross-linking. Subsequent to the utilization of a nuclear and cytoplasmic protein extraction kit (P0027, Beyotime) for nuclear isolation, chromatin DNA was sonicated, producing fragments averaging between 200 - 500 bp in length. The resultant soluble chromatin was subjected to overnight immunoprecipitation at 4 °C using either anti-Xbp1s or control anti-IgG antibodies, employing gentle agitation. Protein A/G beads were incorporated to capture the chromatin-antibody complex, allowing for a 4 h incubation at 4 °C with mild agitation. DNA-protein complexes were subsequently liberated from the beads via elution buffer, subjected to a 30 min incubation at 65 °C under vigorous shaking conditions. Capturing the supernatant with a magnetic stand, the eluted mixture was combined with 5 M NaCl (6 μl) and 20 mg/ml Proteinase K (2 μl), and incubated at 65 °C for 1.5 h. DNA purification was achieved utilizing DNA binding buffer, DNA Clean-Up column, and DNA washing buffer, and the purified DNA was then quantified via qPCR. The primers for detection are listed below: *GFPT2 promoter 1-F* CCTCCTTCCTGGCTTCGCTA, *GFPT2 promoter 1-R* AGGATACAAGGAGGGGGCTG; *GFPT2 promoter 2-F* CAGGCCATCAACCTCCCAGA, *GFPT2 promoter 2-R* ACAGGTCCACGGTGAGGAAC.

**Normalized growth rate inhibition and Clonogenic assay**

H1975 and PC9/OR cells, with stable transfections of either GFPT2 knockdown or an empty vector, were seeded in 96-well plates at a density of 10,000 cells per well. Subsequent to a 24-hour incubation, cell numbers between the two groups were compared utilizing a CCK-8 assay. For drug treatments assays, H1975 cells were seeded in 96-well plates at a density of 10,000 cells per well and allowed to adhere for 24 h preceding drug exposure. Cells were then treated with a range of AZA concentrations (0.001, 0.01, 0.1, 1, 2 and 5 μM) or Arbutin (0.01, 0.1, 1, 10, 100, 1000 and 5000 μM) for 48 h. In parallel, PC9, PC9/OR1 and PC9/OR2 cells were plated similarly and treated with various concentrations of Osimertinib (0.01, 0.1, 1, 5 μM) for 48 h. For both sets of treatments, cell viability post-drug exposure was quantified using the CCK-8 assay. Absorbance readings were normalized to DMSO-treated controls on the same plates, providing normalized growth rate inhibition values.

To delve deeper into the potential influence of GFPT2 expression on tumorigenic capacity, clonogenic assays were conducted. Either wild-type cells or those with GFPT2 knockdown were plated at a density of 500 cells/well in 6-well plates. The culture medium was refreshed every alternate day. After a 7-day incubation period, cells were fixed utilizing 4 % paraformaldehyde (w/v) for 10 min and subsequently stained with 20 % (v/v) crystal violet for 15 min. After washing off excess dye, cell colonies were visualized, captured and quantified.

**Immunofluorescence**

Cells were seeded at a density of 10,000 cells per well in a 4-chamber confocal dish and, post-treatment, were fixed with 4 % paraformaldehyde for 10 min at room temperature following different treatment. Xenograft tumor tissues underwent fixation in 4 % paraformaldehyde overnight, sequentially dehydrated in 20 % and 30 % sucrose solution, and embedded in Tissue-Tek OCT compound (4583, Sakura). Sections of 10 μm thickness were prepared using a Leica microtome. Overall N-glycosylation was assessed by incubation with anti-Phaseolus Vulgaris Leucoagglutinin (PHA)-Rhodamine (1:200, RL-1112, Vector) for 1 h at room temperature. Specific immune checkpoint ligands and pEGFR glycosylation were probed using primary antibodies against PD-L1 (1:100, ab213524, Abcam), CD276 (1:200, ab134161, Abcam), PVR (1:200, ab103630, Abcam), CD73 (1:200, ab133582, Abcam) and pEGFR (1:500, ab40815, Abcam) overnight at 4 °C, followed by a 1 h incubation with anti-PHA (1:200, RL-1112, Vector). Samples were subsequently treated with Cy2-conjugated anti-rabbit secondary antibody (1:200,111-225-144, Jackson ImmunoResearch) for 2 h at room temperature in the dark. The PHA+ target protein intensity and ratio were analyzed using Image J. For PD-L1/PD-1 binding assessment, samples were treated with recombinant human PD-1 Fc protein (1086-PD-050, R&D System) at 4 °C overnight, followed by incubation with an anti-human Alexa Fluor 488 conjugate (1:200, A-10631, Thermo Fisher). For comparing tumor cell growth in different groups, tumor sections in a cryostat were incubated with either anti-Ki67 (1:200, ab15580, Abcam) or anti-cleaved CASP3 (1:200, ab32042, Abcam), along with anti-PanCK (1:200, ab7753, Abcam) primary antibody at 4 °C overnight, followed by a 2 h exposure to Alexa Fluor 555-conjugated anti-rabbit secondary antibody (1:200, A0453, Beyotime) and Cy5-conjugated anti-mouse secondary antibody (1:200, 15-175-166, Jackson ImmunoResearch), shielded from light. PanCK+Ki67+ and PanCK+ CASP3+ subpopulation ratios were determined by Image J. All samples received a 10 min DAPI counterstain (C1006, Beyotime) in the dark and then were mounted with Fluoromount-G® (Southern Biotech, 0100-20). Imaging was conducted on an Olympus FV3000 confocal microscope using either 60 X or 100 X objectives.

**ELISA**

A 30 mg portion of tumor tissue was homogenized in 300 μl of deionized water, followed by a 1:50 dilution in assay diluent. TIF and cell culture supernatant were harvested post various treatments. The levels of VEGF, CCL5, CXCL9, CXCL10, CXCL11, IFNγ, IL-2 and GZMB in the samples were quantified using the respective ELISA kits: VEGF (EH015, ExCell), CCL5 (CSB-E17375h, CUSABIO), CXCL9 (CSB-E09024h, CUSABIO), CXCL10 (CSB-E08181h, CUSABIO), CXCL11 (CSB-E09023h, CUSABIO), IFNγ (EH005, ExCell), IL-2 (E-EL-H0099, Elabscience), and GZMB (E-EL-H1617c, Elabscience). Procedures followed the manufacturer's guidelines. The absorbance was recorded using Biotek Synergy H1 microplate reader.

**MicroScale Thermophoresis assay**

293T cells were engineered to ectopically express either GFP-GFPT1 or GFP-GFPT2. Cell homogenates were obtained and adjusted to predetermined concentrations. These preparations were then subjected to incubation with six identified compounds across a range of concentrations for 15 min. The mixtures were introduced into NanoTemper glass capillaries, and microthermophoresis was conducted using the Monolith NT.115 instrument (NanoTemper) in strict adherence to the manufacturer's guidelines. Dissociation constants (Kd values) were computed employing the mass action equation, utilizing the NanoTemper software, and were grounded in duplicate read measurements.

**N-glycoproteomes**

Proteins in the samples were quantified using the BCA protein assay. Subsequently, 1 mg of protein from each condition was aliquoted into a fresh Eppendorf tube, and its volume was brought to 200 μl using 8 M urea. The samples were then reduced by the addition of 20 μl of 0.5 M TCEP and incubated at 37 °C for 1 h. Alkylation was achieved by adding 40 μl of 1 M iodoacetamide and incubating in the dark at room temperature for 40 min. Proteins were precipitated by the addition of five volumes of pre-chilled acetone at -20 °C overnight. The resulting precipitates were rinsed twice with 1 ml of 90 % pre-chilled acetone and subsequently solubilized in 1 ml of 100 mM TEAB. Digestion was carried out using sequence-grade modified trypsin (Promega, Madison, WI) at an enzyme-to-protein ratio of 1:50 (w/w) and incubated at 37 °C overnight. The resulting peptides were purified using C18 ZipTips, quantified via the Pierce™ Quantitative Colorimetric Peptide Assay (23275, Thermo Scientific), and lyophilized using SpeedVac. The lyophilized peptides were resolubilized in 80 % acetone with 1 % TFA and loaded onto an ihouse ZIC-HILIC micro-column containing 30 mg of ZIC-HILIC particles (Merck Millipore, Merck KGaA, Darmstadt, Germany) with a C8 disk. The eluate was recycled over the column five times in total. After washing the column with 80 % acetone and 1 % TFA, enriched glycopeptides were sequentially eluted using 0.1 % TFA, 25 mM NH4HCO3 and 50 % acetone, then dried via vacuum centrifugation. These peptides were subsequently resuspended in 10 µl of solvent A (solvent A: 0.1 % formic acid in H2O) for analysis on an Orbitrap Fusion Lumos Tribrid mass spectrometer (Thermo Scientific, MA, USA) coupled to an EASY-nano-LC 1200 system (Thermo Scientific, MA, USA) ﻿without the trap column. 3 µl of the peptide sample was loaded onto a C18 spray tip column (15 cm × 75 μm i.d., Acclaim PepMap) and eluted over a 120 minutes gradient from 3 % to 32 % solvent B (solvent B: 0.1 % formic acid in ACN) at 300 nl/min. The electrospray voltage of 2 kV was applied relative to the mass spectrometer's inlet. ﻿The mass spectrometer was run under data dependent acquisition mode, and automatically switched between MS and MS/MS mode. The parameters were MS: scan range (m / z) = 400 - 2000; resolution = 120,000; AGC target = 800,000; maximum injection time = 100 ms; included charge state = 2 – 6; dynamic exclusion after n times, n = 1; dynamic exclusion duration = 30 s; each selected precursor was subject to one HCD-MS/MS; HCD-MS/MS: isolation window = 4; detector type = Orbitrap; resolution = 15,000; AGC target = 200,000; maximum injection time = 22 ms; collision energy = 30 %; stepped collision mode on, energy difference of ± 10 % (10 % as absolute value in the Orbitrap Fusion). Tandem mass spectra were analyzed using by pGlyco 3.0 from pFind Studio. Searches were conducted against the UniProt-homo_sapiens protein database (ver.2022, 20589 entries) and the human-specific glycan database (pGlyco, species: human) assuming the digestion enzyme Trypsin. The search parameters for pGlyco 3.0 included a fragment ion mass tolerance of 20 ppm and a parent ion tolerance of 10 ppm. Carbamidomethylation (C) was set as a fixed modification, while oxidation (M) was considered a variable modification. Glycopeptide identifications were filtered to achieve a 1 % total FDR. For quantitative analysis of site-specific glycosylation, the pGlycoQuant tool within pFind Studio was employed using label-free quantification.
