# Supplementary material for: GFPT2 controls immune evasion in EGFR-mutated non-small cell lung cancer
Source: Research Square preprint supplement (doi:10.21203/rs.3.rs-4203208/v1), 2024-04-26
Supplement: Supplementary file 12 [file cbf64c693515cec253b289f2.xlsx]

## Sheet: Description
Table S5. RNA-seq performed on H1975 cells treated with EGF (20 ng/mL), Almonertinib (2 μM) for 24 h and EGFR knockdown. Related to Fig.1 and Extended Data Fig.2.
Sheet	Description
Table S5A	Gene_fpkm of H1975 cells treated with EGF (20 ng/mL), Almonertinib (2 μM) for 24 h and EGFR knockdown.
Table S5B	A list of gene altered at different side between Almonertinib_vs_Control.result and EGF_vs_Control.result with no change in shEGFR_vs_shNC.result
Table S5C	Genes at Table S5B list in EGF_vs_Control.result
Table S5D	Genes at Table S5B list in Almonertinib_vs_Control.result
Table S5E	Genes at Table S5B list in shEGFR_vs_shNC.result
Table S5F	Relative expressions of genes at Table S5B list

## Sheet: Table S5A
gene id	Ctrl-1	Ctrl-2	Ctrl-3	EGF-1	EGF-2	EGF-3	Alm-1	Alm-2	Alm-3	shNC-1	shNC-2	shNC-3	shEGFR1	shEGFR2	shEGFR3
ENSG00000284662	0	0	0	0	0	0	0	0	0	0	0	0	0	0	0
ENSG00000186827	0.110086	0.0305418	0.064489	0.165455	0.0490812	0.037013	0.259472	0.183061	0.230614	0.117054	0.0290652	0.0499068	0.073157	0.127568	0.111205
ENSG00000186891	6.04051	8.731	10.1352	4.41925	5.38627	4.41291	9.76506	11.1962	8.90469	4.55944	4.76481	3.87663	4.5263	4.45913	4.29394
ENSG00000160072	3.45913	3.42134	3.81436	5.71924	6.10297	5.79234	3.1521	3.40413	2.7061	7.2316	7.68401	7.30884	6.6982	6.04772	6.09787
ENSG00000041988	2.57211	2.94479	2.98624	2.34896	2.636	2.28525	3.81608	4.11402	3.37677	2.54929	2.6918	2.65219	2.63998	2.49236	2.50419
ENSG00000260179	0.304184	0.371324	0.463302	0.261245	0.35261	0.204546	0.446109	0.606992	0.191167	0.388126	0.546119	0.294187	0.188668	0.366591	0.460914
ENSG00000234396	0.436122	0.645312	0.681288	0.249705	0.777772	0.488776	0.609148	0.966966	2.28404	0.309152	0.307057	0.0878726	0.386431	0.404306	0.146852
ENSG00000225972	0.50959	0.282758	0.298522	0.656482	0.567997	0.599671	1.06765	0.484226	0.26688	0.270923	0.672718	0.847073	1.01594	1.06293	0.772155
ENSG00000224315	0.0674138	0	0	0	0	0.0453318	0	0	0	0	0	0.122247	0	0.0624958	0
ENSG00000198744	5.71822	6.8265	5.88748	4.68779	5.2534	5.76774	5.71786	5.68058	5.5357	3.40858	2.83648	2.93273	2.37981	2.00798	2.45057
ENSG00000279928	0	0.0922683	0	0	0.148277	0.0559092	0	0.0790053	0.0870873	0.265219	0.0878074	0.150771	0.147341	0.154156	0.251966
ENSG00000228037	0.227118	0.336057	0	0.065019	0.0675063	0.0509077	0.079306	0.0719377	0.23789	0.0804979	0.159905	0	0	0.070183	0
ENSG00000142611	0.111602	0.118465	0.0909594	0.087513	0.103841	0.104411	0.0813278	0.115268	0.0864007	0.0464345	0.0307465	0.0381288	0.0687902	0.0809688	0.0735235
ENSG00000225630	58.2866	31.7371	44.888	52.4758	32.2609	51.7706	36.616	29.8495	54.2043	66.4649	71.4798	74.9363	58.5235	63.5873	65.9409
ENSG00000067606	1.76141	2.51516	2.32346	1.47045	1.60908	1.4495	2.3226	2.62766	2.30943	1.78778	1.75615	1.61195	1.57709	1.40454	1.31894
ENSG00000131584	9.26393	10.9813	11.8358	7.52146	9.55158	7.41164	14.2773	15.7385	10.8093	6.66719	7.20834	6.69197	7.01718	7.40232	7.45018
ENSG00000227589	0.062854	0.139504	0.147281	0.0539813	0	0.126797	0.329215	0.119451	0.197506	0	0.0663796	0.113978	0.111385	0.116537	0.126986
ENSG00000237402	0	0.14409	0	0	0	0	0	0.246756	0	0	0	0	0	0	0
ENSG00000284616	0	0	0	0	0	0	0	0	0	0	0	0	0	0	0
ENSG00000169972	3.37275	4.34175	3.95156	4.02219	4.88066	4.4193	3.45238	3.84584	3.73459	6.61916	7.49023	6.17431	6.23307	6.53926	6.38574
ENSG00000157911	6.71657	8.39929	8.00136	5.76843	6.69305	6.27758	8.72932	10.2045	8.04579	5.51617	4.698	5.16576	6.17335	5.77352	5.54433
ENSG00000269896	1.8311	2.7094	1.63784	1.50497	1.56255	1.20482	1.52629	1.77737	1.95919	1.31894	1.16444	1.41626	1.36078	1.49673	1.82982
ENSG00000237973	70.1204	50.0025	52.8981	54.3132	48.202	63.0549	61.0676	57.9037	64.374	52.3512	58.4514	54.9537	41.9649	45.4721	43.9953
ENSG00000224051	8.34691	8.3984	9.21433	8.07666	7.90598	7.55857	11.2893	11.7209	10.6857	7.29743	8.01195	7.32139	7.5931	7.51444	7.86963
ENSG00000228750	0	0	0.0253771	0	0	0	0	0	0	0	0	0	0	0	0
ENSG00000228463	0.472536	0.223827	0.344331	0.35139	0.241509	0.286752	0.229393	0.229984	0.319906	0.245096	0.31038	0.289112	0.331893	0.427379	0.325988
ENSG00000238260	1.37147	1.26832	2.05318	0.588934	0.883226	0.922231	2.55411	1.52041	1.59613	0.405078	0.4828	0.368443	0.607603	0.423806	0.538771
ENSG00000260972	0	0	0	0	0	0	0	0	0	0	0	0	0	0	0
ENSG00000157933	12.4232	11.6668	12.2833	12.4218	10.8002	10.8644	10.3384	10.7873	9.89764	12.6787	12.0732	12.2939	11.5078	10.4906	10.386
ENSG00000162591	20.4729	25.1625	24.9342	15.8684	17.4638	14.8831	22.6132	24.3011	18.0378	10.0493	10.2309	9.15506	8.48128	8.01644	8.46982
ENSG00000224340	0	0	0	0.120777	0	0	0	0	0	0	0	0	0.124606	0	0
ENSG00000270035	0.0831437	0	0	0	0.0741385	0.0559092	0.174195	0	0.0870873	0	0	0	0.147341	0	0
ENSG00000169962	1.96387	2.84531	2.31687	0.726192	1.30121	1.01795	1.5858	1.7754	1.25706	0.464039	0.432088	0.354474	0.483363	0.379291	0.316861
ENSG00000226545	0	0	0	0	0	0	0	0	0	0	0	0	0	0	0
ENSG00000233653	0	0	0	0	0	0	0.0200426	0	0	0	0	0.011565	0	0	0
ENSG00000268663	0	0.12404	0	0	0	0	0	0.10621	0	0	0	0	0	0	0
ENSG00000226374	0	0	0	0	0	0	0.0228992	0	0	0	0	0	0	0	0
ENSG00000116285	39.1814	28.4548	31.6887	63.103	49.6611	57.0257	16.3109	14.5476	18.3996	39.4186	37.6904	38.5655	31.8734	32.4647	33.6685
ENSG00000229280	0	0	0	0	0	0	0	0	0	0	0	0	0	0	0
ENSG00000142655	8.40511	11.9643	10.9459	8.52352	11.0836	8.92354	13.0887	14.9598	12.3253	8.83402	9.30333	8.51969	8.60753	8.90079	8.94773
ENSG00000232596	0	0	0	0	0	0	0	0	0	0	0	0	0	0	0
ENSG00000235054	0	0	0	0	0	0	0	0	0	0	0	0	0	0	0
ENSG00000232663	0	0	0	0	0	0	0	0	0	0	0	0	0	0	0
ENSG00000284646	0	0.0708799	0	0	0	0	0	0	0	0	0	0	0	0	0
ENSG00000240409	0	0	0	0	0.20415	0	0.239834	0	0	0	0	0	0	0	0
ENSG00000229344	1.73724	1.07962	0.732735	0.895203	1.11534	1.16819	1.09191	1.18855	1.5285	0.960546	0.807262	0.546047	0.554148	1.22398	0.912547
ENSG00000231510	0	0	0	0	0	0	0	0	0	0	0	0	0	0	0
ENSG00000149527	0.0833052	0.121641	0.113012	0.10167	0.0742826	0.0855008	0.2618	0.216645	0.110219	0.0419581	0.0509346	0.0583054	0.0932382	0.0609694	0.0487196
ENSG00000284739	0	0	0	0	0	0	0	0	0	0	0	0	0	0	0
ENSG00000007923	9.50076	9.457	10.2901	11.8831	12.0467	11.1849	8.71215	8.31024	7.96892	15.4457	15.4788	14.5459	14.5812	13.8468	14.2688
ENSG00000171621	6.95007	7.9611	7.58574	9.64403	9.8758	10.0523	8.70152	8.29171	8.2025	7.2413	7.13315	7.53988	7.8681	7.11716	7.59988
ENSG00000272235	0	0.0303917	0	0.0235203	0.0366301	0.0184156	0.0286886	0.0260231	0	0.0145599	0.0144612	0.0165539	0.0363988	0.0253884	0
ENSG00000236679	0.492383	0	0.288442	0.317158	0.219527	0.165549	0.515798	0.116969	0.515738	0.654438	0.130001	0.520845	0.218141	0.456463	0
ENSG00000284694	0.0139306	0	0	0	0	0	0	0	0	0	0	0	0	0	0
ENSG00000162441	3.22949	2.20622	2.70556	3.80998	2.86423	4.12144	1.52784	1.68286	2.59156	4.22777	3.60318	4.37123	4.1846	4.37012	4.26206
ENSG00000230021	0.267361	0.306274	0.363767	0.199991	0.18457	0.0985914	0.307179	0.213077	0.19874	0.100875	0.1093	0.140756	0.191047	0.143917	0.165532
ENSG00000271264	0	0	0	0	0	0	0	0	0	0	0	0	0	0	0
ENSG00000287356	0.212667	0.199697	0.354578	0.21777	0.167752	0.132005	0.317032	0.357528	0.291293	0.217431	0.285063	0.158213	0.239168	0.2199	0.19004
ENSG00000224387	0	0	0	0.0894547	0.185754	0	0	0	0	0	0	0	0	0	0
ENSG00000187017	10.43	14.109	12.8989	2.56436	2.87521	2.36078	15.6249	18.6234	13.8737	1.27574	1.2311	1.28563	1.33491	1.04275	1.23954
ENSG00000285629	0.071481	0	0	0	0	0	0	0	0	0	0	0	0	0	0
ENSG00000173673	0	0	0.0782042	0	0	0	0	0	0	0	0	0	0	0	0
ENSG00000227372	4.47001	4.50518	4.88799	2.55514	2.75308	2.42108	5.7368	5.50553	4.57457	2.51413	2.17722	2.14088	2.45434	2.47729	2.58096
ENSG00000142583	2.80121	3.2593	2.9303	2.62672	2.8419	2.70053	4.98552	4.94331	4.03435	0.683844	0.747131	0.721345	0.785136	0.616091	0.613579
ENSG00000223663	0.129133	0	0	0.221809	0	0.260503	0	0	0	0	0	0.156112	0.22884	0	0
ENSG00000107404	28.3717	40.1153	38.304	38.9405	48.6598	40.4961	41.5887	48.0027	33.8604	34.9834	35.2363	33.7825	33.4466	33.6356	33.5436
ENSG00000284674	0	0	0	0	0	0	0	0	0	0	0	0	0	0	0
ENSG00000177000	3.54009	4.01082	3.81967	1.94441	1.80591	1.81029	4.85115	4.46301	3.65626	1.59758	1.62154	1.46305	1.47718	1.59894	1.65913
ENSG00000272161	0	0	0.112627	0.165119	0.171436	0	0	0.0913448	0	0.102214	0	0.0581065	0	0.178233	0
ENSG00000237094	1.26042	1.56829	0.841288	0.77415	0.810576	0.755098	1.22433	0.827492	0.600094	0.454857	0.322697	0.392481	0.365502	0.502797	0.439845
ENSG00000069424	2.43127	2.64042	2.48003	1.10157	1.11201	0.956286	3.77019	3.8279	3.17392	1.04395	0.970447	0.986898	1.35458	1.37161	1.28186
ENSG00000224338	0	0	0	0	0	0	0	0	0	0	0	0	0	0	0
ENSG00000074800	333.315	393.065	377.413	660.914	763.772	710.864	360.873	364.27	348.002	580.674	593.675	569.975	600.392	620.264	607.387
ENSG00000234546	0.110677	0.0491293	0.103737	0.0380214	0.0789518	0.119078	0.0695641	0.0841345	0.0695559	0.0706096	0.0467541	0.0802797	0.0784533	0.0205206	0.0447208
ENSG00000116786	17.0354	21.5893	20.523	15.3986	17.3268	15.0091	25.9997	27.3967	21.2776	16.2975	16.9861	15.2864	16.5165	16.6003	16.479
ENSG00000287727	0.0988705	0.164581	0.270289	0.155675	0.044081	0.14405	0.189882	0.156582	0.0863	0.0350429	0.0870136	0.0796842	0.146009	0.0611051	0
ENSG00000176022	6.28513	8.06237	8.29411	10.7087	11.3896	11.4407	6.95569	7.49747	6.8133	8.38963	9.26063	8.95649	9.80565	9.31945	9.07977
ENSG00000223989	0	0	0	0	0	0	0	0	0	0	0	0	0	0	0
ENSG00000228423	0	0	0	0	0	0	0	0	0	0	0	0	0	0	0
ENSG00000286448	0	0	0	0.0553015	0	0	0	0	0	0	0	0	0	0	0
ENSG00000162496	7.49642	9.83031	8.56175	3.14962	3.78708	3.62654	15.9459	18.1285	16.5089	4.44422	4.67041	4.27864	3.33309	3.83724	4.15404
ENSG00000237365	0	0	0	0	0	0	0	0	0	0	0	0	0	0	0
ENSG00000131686	0.28485	0.158055	0.166867	0.18348	0.174624	0.203516	0.410294	0.355257	0.205123	0.0567901	0.0376035	0.0968514	0.126197	0.0825217	0.0539522
ENSG00000229305	0.0440855	0.0489236	0	0	0.0393107	0.0296449	0	0.0418912	0.0461765	0	0	0.0266479	0	0	0
ENSG00000284703	0	0	0	0	0	0	0	0	0	0	0	0	0	0	0
ENSG00000226457	0.124388	0.138039	0.145735	0	0.110916	0.167287	0	0	0.130288	0.132262	0	0.0751876	0	0.115314	0.125653
ENSG00000162494	0	0	0	0	0	0	0	0	0	0	0	0	0	0	0
ENSG00000173614	3.74201	3.55943	3.57721	2.38384	2.5942	2.48171	3.45688	2.99894	3.40264	2.4704	2.55137	2.51666	2.77822	2.84002	2.87657
ENSG00000248527	627.369	804.571	780.204	657.028	685.948	752.436	870.219	783.217	948.841	489.118	462.432	480.765	420.476	436.313	436.979
ENSG00000237728	0	0	0	0	0	0	0	0	0	0	0	0	0.056441	0	0
ENSG00000215720	0	0	0	0	0	0	0	0.0634268	0	0	0	0	0	0	0
ENSG00000279804	0	0	0	0	0	0	0	0	0	0	0	0	0	0	0
ENSG00000116273	4.80182	3.64907	4.14297	4.99809	4.09558	4.43979	4.74312	4.67441	5.45327	4.74503	4.86446	4.83488	4.76342	4.68135	4.71882
ENSG00000241326	0	0	0	0	0	0	0	0	0	0	0	0	0	0	0
ENSG00000285701	0.0621941	0.0690196	0	0.106829	0	0	0	0.0590984	0.065144	0	0	0	0.0551078	0.172971	0.0628263
ENSG00000233623	0	0	0	0	0.0621455	0.046865	0	0	0	0.0741054	0	0	0.0617531	0	0
ENSG00000162592	0.0670957	0.0372295	0.0524068	0	0	0	0.0468575	0.042504	0.0468521	0.0237809	0.0118099	0.0135189	0.0396339	0.0311004	0.0225925
ENSG00000116254	0.164327	0.182361	0.176025	0.129033	0.146529	0.1547	0.285263	0.214145	0.181957	0.114822	0.0942099	0.133385	0.153924	0.178454	0.132798
ENSG00000049245	36.7968	30.7706	34.152	36.5617	31.6362	35.996	30.6084	29.3135	41.0304	31.7138	32.1948	34.2437	36.8603	37.3596	35.5943
ENSG00000179743	1.07317	0.74434	0.71848	0.608965	0.922759	0.786074	0.782926	1.05617	1.30472	0.264898	0.586921	0.579185	0.475447	0.621799	0.542038
ENSG00000233645	0.0993541	0	0.116405	0	0	0	0	0	0	0	0	0	0	0	0
ENSG00000234064	0	0	0	0	0	0	0	0	0	0	0	0	0	0	0
ENSG00000204624	0.456883	0.481242	0.544363	0.159615	0.255487	0.197875	0.72197	0.699042	0.413665	0.107041	0.155385	0.131062	0.130368	0.172292	0.164272
ENSG00000284708	0.339484	0.25116	0.397744	0.641434	0.302715	0.365252	0.426753	0.45162	0.33188	0.312842	0.14341	0.287286	0.300803	0.230793	0.114311
ENSG00000171603	46.4877	52.9742	51.8594	41.3154	42.1944	39.7243	52.1084	53.1013	46.5521	44.7093	45.982	44.9675	46.4389	45.6614	45.1333
ENSG00000280113	0	0	0	0.0205254	0	0	0	0	0	0	0	0.014446	0	0	0
ENSG00000142606	0.220427	0.312568	0.172171	0.0841383	0.120116	0.0741121	0.384849	0.372366	0.384804	0.156253	0.206926	0.162848	0.16276	0.227052	0.173186
ENSG00000235146	0	0	0	0	0	0	0	0	0	0	0	0	0	0	0
ENSG00000177674	11.8918	15.2703	14.001	13.4224	15.0293	13.454	14.8835	15.2021	14.5759	9.93348	10.4417	10.1057	10.1919	10.5912	9.90895
ENSG00000162572	3.96797	4.66476	4.93862	2.25504	2.96075	2.42278	7.11689	7.75351	4.88381	1.60252	1.69114	1.55865	1.83618	1.80104	1.67706
ENSG00000171608	0.449	0.456752	0.508519	0.488448	0.500461	0.533401	0.540904	0.5902	0.478134	0.278495	0.418863	0.393533	0.39121	0.34687	0.544276
ENSG00000225931	0.109619	0.324397	0.0856207	0	0.130328	0.0491414	0.0765545	0.104163	0.0382728	0.077705	0.0385892	0.0662602	0.0647527	0.101622	0
ENSG00000236601	0	0	0	0	0	0	0	0	0	0	0	0	0	0	0
ENSG00000171729	8.06806	7.73149	8.28657	8.766	8.47823	8.75735	7.43131	7.82745	9.22705	5.69665	5.5015	5.47842	7.14879	6.26234	6.69546
ENSG00000228150	1.50792	0.597647	1.00955	1.57257	1.24856	1.37613	0.564154	0.921129	1.35381	1.37432	1.36501	1.56254	1.14524	0.79881	1.30564
ENSG00000175262	0.145903	0.0588782	0.108781	0.0569576	0.0827911	0.0713534	0.194525	0.151244	0.194502	0.0141035	0.0280158	0.0240525	0.0705158	0.0122963	0
ENSG00000279457	5.93671	5.91059	7.55172	7.74997	4.32572	6.77513	8.13803	7.9944	11.8325	6.1682	4.47837	7.27953	7.42452	5.97535	4.00946
ENSG00000162571	0.0474156	0.0263096	0.0416646	0.0305417	0	0.00797104	0.0745056	0.0225278	0	0.0126042	0.0250376	0.0429912	0.0420131	0.0219783	0
ENSG00000231181	0.423899	0.376336	0.198658	0.218436	0.151195	0.228037	0.355246	0.0805599	0.710408	0.721169	0.805818	0.204984	0.3756	0	0.513849
ENSG00000238173	0	0	0.370167	0	0	0	0	0	0	0.335945	0	0	0	0	0
ENSG00000158109	20.903	22.0579	21.9926	17.5115	18.815	17.9184	27.3764	29.4843	27.3525	12.4877	12.1738	13.0049	14.866	14.529	13.9773
ENSG00000229393	0.0922022	0	0.108025	0	0.0822159	0.124001	0	0	0.289726	0	0	0	0	0	0
ENSG00000269978	0	0	0	0.152442	0	0	0.371877	0	0	0	0	0.10729	0.471822	0	0.179302
ENSG00000037637	2.43561	2.57448	2.5516	2.84629	2.45795	2.9148	2.39714	2.53432	2.36931	2.67928	2.71112	2.64238	2.95982	3.10648	2.93863
ENSG00000184163	1.03026	0.58632	0.959462	0.385692	0.565337	0.65726	1.60504	1.63163	1.41116	0.702226	0.557974	0.654685	0.421326	0.538774	0.400281
ENSG00000287586	0	0	0	0	0	0	0	0	0	0	0	0	0	0	0
ENSG00000159423	11.8349	15.1465	13.8965	8.22555	8.34242	8.10744	14.5711	15.6351	12.984	9.15708	9.26039	9.14921	12.6716	12.2538	12.6143
ENSG00000142599	7.07923	7.16295	7.34195	4.81374	4.69843	4.41259	8.55218	9.08191	6.53914	5.50267	5.75266	5.54985	5.07048	5.05285	5.24805
ENSG00000227169	0	0	0	0	0	0	0	0	0	0	0	0	0	0	0
ENSG00000283356	0	0	0	0	0	0	0	0	0	0	0	0	0	0	0
ENSG00000011021	4.78384	5.30884	4.99338	6.56868	5.94614	5.98528	5.23001	4.89285	3.95393	2.65739	2.90271	2.52712	2.55868	2.49427	2.48359
ENSG00000272482	1.09894	1.52443	0.321884	0.117977	0.367469	0.277115	0.719501	1.04424	0.8633	1.60669	0.870439	1.82673	0.243433	0.636733	0.416292
ENSG00000284747	0.333908	0.21722	0.431681	0.425214	0.51335	0.487779	0.337725	0.273524	0.205023	0.440744	0.437757	0.417587	0.438693	0.480334	0.360564
ENSG00000215912	0.247337	0.268514	0.264585	0.1293	0.134247	0.188013	0.34922	0.34743	0.253436	0.0457379	0.0454279	0.0617521	0.0809923	0.109662	0.0543154
ENSG00000120952	0	0	0	0	0	0	0	0	0	0	0	0	0	0	0
ENSG00000243073	0	0	0	0	0	0	0	0	0	0	0	0	0	0	0
ENSG00000142615	0.155997	0.10387	0.109661	0.0267952	0.0556405	0.0209797	0.0653661	0	0	0.0331743	0	0.0377176	0.0276446	0	0.0315165
ENSG00000215704	0.39248	0.254072	0.229917	0.168538	0.0291642	0.0659798	0.239834	0.372944	0.17129	0.0695538	0.0690824	0.0988491	0.0869402	0.0303206	0.0660781
ENSG00000065526	5.29258	4.7655	4.98083	5.91393	4.73704	4.80824	3.79198	3.4491	3.13019	7.01955	6.94754	6.86788	6.41774	6.02506	6.53854
ENSG00000175756	26.1806	25.9026	30.7733	35.7513	39.1193	36.7372	28.7938	31.4341	34.4712	41.1829	40.6639	40.4381	46.5713	44.9612	44.2307
ENSG00000229484	0.108201	0	0.126769	0	0	0.0727585	0	0	0	0	0	0.0654029	0	0	0
ENSG00000157916	13.0705	14.4217	13.4884	15.1317	16.8843	16.0938	14.5298	14.5492	14.6066	15.5896	14.7802	14.8293	14.9619	15.9551	15.7699
ENSG00000157881	4.72798	5.44386	5.15621	5.15194	6.16554	5.56689	5.44222	5.03425	4.75649	4.93783	4.8945	5.00975	4.91785	5.17132	4.69109
ENSG00000116213	3.17229	3.39642	3.41122	3.22032	3.57601	3.09749	3.94095	3.75767	3.51783	3.59752	3.56003	3.6174	3.56994	3.59119	3.68114
ENSG00000283611	0.106739	0	0.250113	0	0	0	0	0	0.335404	0	0	0.129038	0.283731	0.0989517	0
ENSG00000238290	0.324602	0.463147	0.407473	0.298693	0.392818	0.389778	0.510057	0.594859	0.339998	0.246535	0.146918	0.182194	0.164353	0.236438	0.140529
ENSG00000225387	0	0	0	0	0	0	0	0	0	0	0	0	0	0	0
ENSG00000127463	12.6895	12.3677	12.7797	13.0304	12.3318	12.5455	11.8142	10.8713	10.4067	13.1411	13.3439	13.3596	13.8327	13.626	13.6711
ENSG00000048707	3.68538	2.79577	2.87678	2.74573	2.04092	2.3984	2.32355	1.99925	1.87392	2.81464	3.00764	2.99182	2.90152	2.69091	2.93678
ENSG00000158748	0.0374147	0	0.0438355	0.010711	0	0.00838637	0.0522585	0.0237016	0.0391893	0	0	0.00753855	0.0110506	0	0
ENSG00000235643	0.105237	0.0389289	0	0.0602545	0.0625595	0.0235886	0.0367473	0.0333331	0.036743	0.111899	0	0.0424078	0.0932468	0.06504	0.0354357
ENSG00000225196	0	0	0	0	0	0	0	0	0	0	0	0	0	0	0
ENSG00000130762	2.80399	3.87236	3.92138	3.82249	4.67515	4.21997	3.83252	4.11928	3.77613	3.95637	3.99537	4.20765	4.02254	4.06832	4.45106
ENSG00000187144	0.0315525	0	0.0123225	0	0.00937837	0.0070724	0	0.019988	0.0110164	0.0111832	0	0	0	0.00975023	0.0106244
ENSG00000162444	0.109958	0.0610127	0.193242	0.047218	0.0490243	0.11091	0.0575935	0.0522425	0.115173	0	0.0580629	0.265861	0.389718	0.305809	0.222151
ENSG00000279169	0	0	0	0	0	0	0	0	0	0	0	0	0	0	0
ENSG00000279625	0	0	0	0	0	0	0	0	0	0	0	0	0	0	0
ENSG00000180758	1.99253	1.75508	1.67496	2.37121	1.9042	1.97674	2.16217	2.13958	2.28358	1.74813	1.61361	1.92273	2.05844	2.07082	1.86837
ENSG00000231219	0	0	0	0	0	0	0	0	0	0	0	0	0	0	0
ENSG00000229010	0.0579363	0.0642945	0.067879	0.0497578	0	0	0.182074	0.275263	0.121369	0	0	0.0700403	0	0.0537097	0
ENSG00000184677	6.41437	6.65944	6.4978	6.20583	5.64129	5.7383	6.45409	6.31611	5.64666	4.9353	5.13658	5.10194	5.14769	5.00726	5.02806
ENSG00000230679	0.311789	0	0	0	0.278019	0.139773	0	0	0	0.110508	0.109759	0.0628212	0	0	0.104986
ENSG00000270136	0	0	0	0	0	0	0	0	0	0	0	0	0	0	0
ENSG00000132879	11.2332	13.7484	14.2315	8.44735	10.4839	8.95418	17.4963	19.1138	15.5942	8.55816	8.3015	7.87027	8.22698	7.94733	8.55128
ENSG00000187545	0	0	0	0	0	0	0	0	0	0	0	0	0	0	0
ENSG00000288398	1.7269	1.77812	1.87725	1.20791	1.28587	1.23307	1.52928	1.65786	1.45451	1.15473	1.48534	1.36668	1.65634	1.43588	1.54663
ENSG00000224621	0.435587	0.290034	0.408272	0.748197	0.699137	0.702975	0.0912602	0.165562	0.0912496	0.555791	0.276012	0.579249	0.463149	0.565334	0.616021
ENSG00000239810	0	0	0	0	0	0	0	0	0	0.0273126	0	0	0	0	0
ENSG00000285833	0	0	0	0	0	0	0	0	0	0	0	0	0	0	0
ENSG00000224459	0	0	0	0.0636962	0.0661329	0	0	0	0.0776835	0	0.0783259	0	0	0	0
ENSG00000116731	2.42969	1.69002	2.04857	2.12024	1.47401	1.97809	1.72257	1.31929	1.81781	2.37127	2.24523	2.33148	2.11441	2.09557	1.97227
ENSG00000116721	0	0.0215633	0.0227655	0.0333759	0.0346527	0	0.0203549	0	0.0203525	0.0206608	0	0	0	0.0180133	0.0196284
ENSG00000215785	0.095935	0.425854	0.224798	0.0823925	0.0855444	0.0645106	0.401988	0.18232	0	0.102008	0	0	0	0	0.0969101
ENSG00000131697	2.80745	3.42311	3.28925	2.52861	2.80186	2.42031	3.51029	3.77242	2.96323	1.72603	1.89299	1.71004	1.87206	2.08545	1.97065
ENSG00000284692	0	0	0	0	0	0	0	0	0	0	0	0	0	0	0
ENSG00000284745	0	0	0	0	0	0	0	0	0	0	0	0	0	0	0
ENSG00000225952	0	0	0	0	0	0	0	0	0	0	0	0	0.0874836	0	0
ENSG00000280222	0	0	0	0	0	0	0	0	0	0	0	0	0	0	0
ENSG00000088280	11.6009	12.3047	12.2783	7.18893	6.4727	6.13981	17.1391	16.0974	15.1965	7.31427	7.68614	7.19034	8.48598	8.52619	9.14666
ENSG00000188807	1.61571	1.88343	1.86913	2.25053	2.36689	2.11359	1.24452	1.39982	1.16615	3.42874	3.57041	3.51669	3.65724	3.35441	3.57972
ENSG00000284693	0.25295	0.280709	0.232854	0.263794	0.144998	0.0971963	0.454248	0.274696	0.302797	0.13448	0.0572439	0.0546063	0.144083	0.167497	0.0730059
ENSG00000232298	0	0.0614403	0	0	0	0	0	0	0.0579904	0.0588688	0	0.0334655	0.147169	0	0
ENSG00000227634	0.0473446	0.0525404	0.110939	0	0	0.0318364	0	0	0.14877	0	0	0	0.0839004	0	0.0478258
ENSG00000225315	0.208775	0	0	0	0.0930814	0	0.109351	0.0991916	0	0	0.110243	0	0	0.0967721	0
ENSG00000198793	7.72656	8.16805	7.69215	9.44011	8.9118	8.48387	5.74293	5.19085	4.51382	9.64498	10.5014	9.31959	10.4471	10.0309	10.6705
ENSG00000078900	0.0560271	0.108808	0.123079	0.108266	0.0936729	0.113025	0.051355	0.0998219	0.0366778	0.0521268	0.0887547	0.0761987	0.111698	0.10388	0.0848948
ENSG00000142661	0.149161	0.119867	0.126549	0.106018	0.188042	0.141806	0.0754328	0.0781993	0.102361	0.0601594	0.10864	0.0932705	0.0911485	0.104901	0.114306
ENSG00000285945	0	0	0	0	0	0	0	0	0	0	0	0	0	0	0
ENSG00000171819	0	0	0	0.0183012	0	0.0429877	0	0.0202486	0.02232	0	0.0225046	0	0.0377627	0.0197547	0.0215259
ENSG00000229162	0.057795	0.128275	0.338567	1.04237	0.515353	0.73841	0.36326	0	0.121073	0.430173	0.671405	0.349347	0.563309	0.535787	0.46706
ENSG00000197921	0	0	0	0	0	0	0	0	0	0	0	0.0216363	0	0	0
ENSG00000233755	0	0	0	0	0	0	0	0	0	0	0	0	0	0	0
ENSG00000116288	51.2869	48.5996	55.5018	65.9347	68.6862	72.2985	44.302	43.267	54.817	62.5009	62.3696	64.7026	67.0262	71.6296	71.2612
ENSG00000238164	0.308893	0.46277	0.398094	0.145909	0.241008	0.135013	0.550089	0.653078	0.590468	0.065689	0.0978659	0.084021	0.0821094	0.0501127	0.0702073
ENSG00000233929	0.254795	0	0.298522	0	0	0.171335	0.800735	0.968452	0.800641	0.541846	0.269087	0	0.677292	0.236207	0.772155
ENSG00000287810	0.267751	0	0	0	0	0	0	0	0	0	0	0	0	0	0
ENSG00000271742	0	0	0	0	0	0	0.193928	0	0.387811	0	0	0	0	0	0
ENSG00000142677	0.52153	0.560095	0.650453	0.65019	0.720067	0.690082	0.405342	0.62346	0.458159	1.18064	1.31477	1.36267	1.08819	1.20091	1.35956
ENSG00000131910	0.162719	0.225721	0.714914	0.174686	0.145095	0.246192	0.255685	0.15462	0.255655	0.0865094	0	0.0245893	0	0.0377121	0.0410932
ENSG00000185436	0.57561	0.340683	0.449595	0.43668	0.367841	0.335455	0.35174	0.346408	0.251213	1.18329	1.20566	1.40333	1.14756	1.09392	1.11447
ENSG00000131914	0.0357675	0.0264618	0.0419057	0.0102395	0	0.00801716	0.0124894	0.0679743	0.037464	0	0.0629563	0.02162	0.0316922	0.0552636	0.036131
ENSG00000226396	2.60395	2.42737	3.41692	3.22037	3.9937	3.64208	5.12822	2.96921	3.92754	2.43652	2.42001	2.58133	1.56894	2.6071	2.84085
ENSG00000232423	0	0	0	0	0	0	0	0	0	0	0	0	0	0	0
ENSG00000229247	0	0	0	0	0	0	0	0	0	0	0	0	0	0	0
ENSG00000169504	60.7703	30.6115	38.8066	89.3856	57.1494	78.4114	23.5169	19.6282	32.4153	49.0493	46.0166	52.7654	46.9556	47.0327	47.9272
ENSG00000224311	0	0	0	0	0	0	0	0	0	0	0	0	0	0	0
ENSG00000225159	2.18648	2.72974	2.56171	2.39423	2.63205	2.86704	3.20663	2.38929	2.63371	3.77792	3.75232	2.7424	3.0029	3.09113	3.20262
ENSG00000260063	0.189568	0.0525929	0.138813	0.183159	0.190165	0.127473	0	0.112582	0.173739	0.0251959	0.1001	0.0859394	0.146972	0.109836	0.0957472
ENSG00000272088	0.992501	0.137678	0.43606	0.106549	0.553128	0.166849	0.519849	0.47155	0.779682	0.263831	0.393065	0.299963	0.329781	0.115012	0.375971
ENSG00000228338	0	0	0	0	0	0	0	0	0	0	0	0	0	0	0
ENSG00000270728	2.52757	1.70301	1.26914	1.47302	1.28789	1.21403	1.51301	0.943549	1.41828	2.20764	1.90668	1.90977	2.23958	1.75738	1.82376
ENSG00000169641	9.10741	6.29503	7.26689	8.65621	6.85647	7.87631	5.93711	5.24561	5.79764	8.55167	8.80984	9.02284	8.64365	8.70685	8.62498
ENSG00000181773	0.133061	0.39377	0.207862	0.704712	0.92942	1.08862	0.0232314	0.105365	0.116144	1.6978	1.59261	1.46114	2.02395	1.80919	1.9938
ENSG00000175707	0.229934	0.396928	0.269394	0.0877669	0.136687	0.0343593	0.240868	0.412701	0.34788	0.624803	0.404719	0.5405	0.271647	0.307897	0.283887
ENSG00000241547	0.810118	0.786646	0.830502	0.608789	1.08356	1.2938	0.530401	1.05847	0.424271	0.861397	1.60417	0.795736	0.717814	0.751018	1.02294
ENSG00000224129	0	0	0	0	0	0	0	0	0	0	0	0	0	0	0
ENSG00000234166	0	0	0	0	0	0	0	0	0	0	0	0	0	0	0
ENSG00000230228	0	0	0	0	0.114834	0	0	0	0.134891	0	0	0.0778437	0.114109	0	0
ENSG00000237436	0.45679	0.25346	0.401386	0.294231	0.407315	0.460745	0.119628	0.217026	0.358842	0.242852	0.361809	0.690277	0.505929	0.317599	0.346074
ENSG00000233954	2.54351	2.91915	2.92907	3.23001	4.36159	3.78618	3.1427	3.51175	3.5522	4.57686	3.28311	3.45597	3.56355	3.40593	2.96465
ENSG00000174950	0.570414	0.422009	0.417691	0.224534	0.360282	0.255713	0.672232	0.542022	0.771731	0.530705	0.953816	0.847614	0.652837	0.793201	0.504185
ENSG00000235282	0	0	0	0	0	0	0	0	0	0	0	0	0	0	0
ENSG00000055070	23.1863	23.7566	22.7861	26.8056	27.5459	26.8884	22.0589	20.8831	20.5698	31.3806	31.2946	31.075	33.1545	29.4812	29.2673
ENSG00000225891	0.112748	0.125122	0.17613	0.0322775	0.134049	0.151633	0.11811	0.178561	0.196827	0.0799234	0.158764	0.0227173	0.0666013	0.174205	0.227789
ENSG00000175087	2.3696	1.38402	1.89954	1.50847	1.31596	1.7262	1.68751	1.5406	1.99212	1.304	1.32809	1.60194	1.7773	1.71499	1.81626
ENSG00000171735	1.93339	1.74194	1.59796	1.98927	1.96295	2.33629	1.61926	1.61433	2.08524	2.18807	1.84978	2.05093	2.50604	2.28923	2.23826
ENSG00000157191	10.5965	11.3872	11.9011	11.9151	12.4246	12.4408	12.2537	13.3546	13.6757	8.13035	8.09342	7.91288	8.00975	8.2766	8.44522
ENSG00000270733	0.13238	0	0	0.113692	0.236084	0.0890174	0.27735	0	0.138659	0.563036	0	0.240054	0.351889	0.368167	0
ENSG00000284699	0	0.0593599	0	0	0.0476963	0.107906	0	0.101655	0	0	0	0.0323324	0	0	0.0540334
ENSG00000133226	6.89163	4.74013	5.42494	6.99259	4.99831	5.96171	4.78783	4.3771	5.87757	8.87357	8.08688	9.03655	8.94228	8.74587	8.12196
ENSG00000229985	0	0	0	0	0	0.060471	0.0942041	0	0	0	0	0	0	0	0
ENSG00000162482	0.936137	1.29859	1.27959	0.904487	1.32168	0.865557	1.38926	1.0378	1.18482	1.03687	0.865066	0.730898	1.03684	0.940163	1.18206
ENSG00000230035	0	0	0	0	0	0	0	0	0	0	0	0	0	0	0
ENSG00000235185	0	0	0.268237	0	0	0	0	0	0	0	0.483577	0.138389	0.405721	0	0.231273
ENSG00000236782	0.114308	0	0.133924	0.0981715	0.0815416	0.061492	0	0.0217236	0.0957834	0.0486172	0.120719	0.12437	0.0810268	0.105969	0.254033
ENSG00000215910	0	0	0.00854362	0.0125256	0	0	0	0	0	0.0155075	0.00770122	0	0	0	0
ENSG00000116663	4.09728	5.45633	5.18447	3.61273	4.18936	3.74704	6.20927	5.68428	4.80662	3.89192	4.61558	4.01216	3.2674	3.31725	3.44911
ENSG00000225643	0.4906	0.217776	0.689752	0.505614	0.0874927	0.593818	0.411143	0.839124	0.411095	0.208661	0.207247	0.474476	0.17388	0.454809	0.297352
ENSG00000215695	0	0	0	0	0	0	0	0	0	0	0	0	0	0	0
ENSG00000284666	0	0	0	0	0	0	0	0	0	0	0	0	0	0	0
ENSG00000243659	0	0	0.393794	0	0.149854	0	0	0	0.176028	0.178694	0	0.101583	0.148908	0.155796	0.509294
ENSG00000240553	0.071159	0.0789683	0.0833709	0	0.0634519	0	0	0	0	0	0	0	0	0	0
ENSG00000228943	0	0	0	0	0	0	0	0	0	0	0	0	0	0	0
ENSG00000215906	0	0	0	0	0	0	0	0	0	0	0	0	0	0	0
ENSG00000230703	0	0	0	0	0	0	0	0	0	0	0	0	0	0	0
ENSG00000188822	0	0	0	0	0	0	0	0	0.0188565	0	0.00950622	0.00544093	0.0159514	0.0417232	0.0090928
ENSG00000232848	0.11848	0	0	0.0508774	0.211295	0.0796706	0.186171	0.0562912	0.0620497	0	0	0	0.10498	0	0
ENSG00000234397	0	0	0	0	0	0	0	0	0	0	0	0	0	0	0
ENSG00000090273	29.5534	31.2824	32.4221	44.1175	49.6038	47.2093	26.0953	30.7388	28.5324	54.302	52.8093	51.8513	57.6655	55.4118	53.7401
ENSG00000284309	0	0	0	0	0	0	0.0527583	0.0478565	0	0	0.0531883	0	0	0	0
ENSG00000227868	0.143612	0.159372	0.168258	0.123339	0.0640287	0.144856	0	0.136464	0.150424	0.152702	0.303335	0.217019	0.381747	0.199702	0.0725358
ENSG00000269925	1.2059	0.401473	0.988995	0.310702	0.430117	0.567627	0.378974	0.229176	0.884169	1.41045	0.254709	0.874702	0.854802	1.00613	0.852711
ENSG00000142751	6.62303	8.59957	7.79318	6.98309	8.10119	6.7959	8.39756	8.66926	6.68727	7.49889	7.77059	7.11836	7.04379	6.90956	6.8446
ENSG00000189266	17.3582	10.1455	13.3437	19.3124	13.8569	17.9929	10.5113	8.60565	16.349	20.536	20.8135	23.193	23.7241	24.2332	25.6262
ENSG00000162511	1.24793	1.58039	1.49649	2.62267	2.94556	3.09007	1.18423	1.38112	1.0457	2.73189	3.03899	2.4582	1.39193	1.15689	1.24578
ENSG00000158014	0.0272133	0	0.0159417	0	0	0	0.042761	0	0	0	0	0.00822466	0	0	0
ENSG00000204138	6.49639	5.50583	5.72931	6.10223	5.40582	5.60971	5.06158	4.82518	5.90223	7.10043	7.6953	7.77139	7.71893	7.8358	7.36064
ENSG00000233419	0	0	0	0	0	0	0	0	0	0	0	0	0	0	0
ENSG00000235263	0	0	0	0	0	0	0	0	0.0701127	0	0	0	0	0	0
ENSG00000228176	0	0.105608	0	0	0.169715	0.0639924	0.19938	0	0	0	0	0	0.0843215	0	0.0961317
ENSG00000229106	0	0	0	0	0	0	0	0	0	0.0397725	0	0	0	0	0
ENSG00000236155	0.0297035	0.0164816	0.104403	0.0510209	0.0529727	0.0199738	0.140022	0.0705625	0.0933371	0.0789591	0.0627392	0.0448864	0.105276	0.0413048	0.0750135
ENSG00000231251	0	0	0	0	0	0	0	0	0	0	0	0	0	0	0
ENSG00000142675	7.2524	7.87566	8.09039	4.5841	5.01558	4.35371	10.0294	10.2689	8.90006	7.67328	7.41906	6.65524	7.8046	7.31133	6.90299
ENSG00000197245	0.541815	0.657646	0.733985	0.159957	0.166077	0.136627	1.36574	1.33538	1.56066	0.0540104	0.0178815	0.0204691	0.225038	0.172662	0.153934
ENSG00000231949	0	0	0	0	0	0	0	0	0	0	0	0	0	0	0
ENSG00000261025	0	0.021528	0	0	0	0.0260894	0	0	0	0	0	0	0.0171888	0	0.0195962
ENSG00000116237	10.6559	10.4008	10.4491	19.2236	17.9708	18.8029	6.98678	6.70451	7.41058	20.8135	19.4187	20.9919	20.4744	20.0166	20.2805
ENSG00000158195	27.8045	27.2361	26.8487	28.257	25.6708	25.4059	25.0544	23.3607	23.4524	24.7834	26.7915	25.6764	21.7759	21.6541	22.0955
ENSG00000130772	6.43797	8.03105	7.35011	6.1749	7.10252	6.08293	7.33484	7.36782	7.87542	5.12162	5.28542	4.91407	4.76757	5.09702	4.55713
ENSG00000215899	0	0	0	0	0	0	0	0	0	0	0	0	0	0	0
ENSG00000237429	0.502388	0.557522	0.392403	0.287646	0.149325	0.112609	0.526278	0.636509	0.350811	0.178063	0	0.202449	0.445146	0	0.845823
ENSG00000271398	0.334531	0	0	0.0957692	0.198866	0.0749841	0	0.10596	0.233599	0.118569	0.23553	0.0674035	0.19761	0	0.112644
ENSG00000225011	0	0	0	0	0	0	0	0	0	0	0	0	0	0	0
ENSG00000215905	0	0	0	0	0	0	0	0	0	0	0	0	0	0	0
ENSG00000240731	7.12106	5.58629	6.61697	4.74504	4.81708	5.77921	5.27323	5.1333	5.01542	4.83029	4.53823	5.26917	4.78667	5.691	4.71295
ENSG00000235069	0	0	0	0	0	0	0	0	0	0	0	0	0	0	0
ENSG00000172746	0	0	0	0	0	0	0	0	0	0	0	0	0	0	0
ENSG00000284676	0	0	0	0	0	0	0	0	0	0	0	0	0	0	0
ENSG00000237058	0	0	0	0	0	0	0	0	0	0	0	0	0	0	0
ENSG00000204160	3.71497	4.18046	3.98641	3.94346	3.92405	3.95726	4.25533	4.02493	3.90936	4.5131	4.87669	4.59603	5.36053	4.81188	5.08548
ENSG00000233399	0	0	0	0	0	0	0	0	0	0	0	0	0	0	0
ENSG00000090020	4.40642	5.40786	5.20743	5.05899	5.38895	4.9127	5.22501	5.10301	4.49522	5.32794	5.29991	5.14666	5.83619	5.51753	5.63355
ENSG00000225990	0	0	0	0	0	0	0	0	0	0	0	0	0	0	0
ENSG00000157978	6.00009	6.43335	6.35783	7.16129	7.86012	7.6066	5.47201	4.97199	5.19411	6.9522	6.42052	6.79494	6.41101	5.70143	5.86499
ENSG00000226944	0.501502	0.834808	1.32202	0.646062	1.00617	0.33723	1.83872	2.3827	1.96983	0.266623	0.529632	0.151569	0.222181	0.232458	0.506599
ENSG00000158246	9.27147	14.4399	12.4477	6.08307	7.68183	6.08734	19.8207	21.6657	16.2757	6.21963	5.94635	6.39795	7.7391	7.96798	7.79805
ENSG00000270282	0	0	0	0	0	0	0	0	0	0	0	0	0	0	0.129739
ENSG00000130770	37.5088	38.4106	39.6286	39.8787	43.5125	43.083	41.1221	45.6807	47.8103	42.9405	42.0872	40.7617	42.9169	39.6497	37.3307
ENSG00000117305	7.57024	8.95238	8.58329	5.24323	5.609	5.14716	10.6031	10.7782	10.7782	4.5485	4.11749	4.20433	4.18578	4.15302	4.01499
ENSG00000235131	0	0	0	0	0	0	0	0	0	0	0	0	0.119636	0	0
ENSG00000229044	0	0	0.126481	0	0	0	0	0	0	0	0	0	0	0.200157	0
ENSG00000162512	54.2743	57.3348	56.9554	34.261	34.495	33.5733	47.2564	45.7278	42.185	50.8696	51.46	49.4917	42.0872	41.8451	41.3075
ENSG00000179840	0	0	0	0	0	0	0	0	0	0	0	0	0	0	0
ENSG00000272449	0.495278	0.274816	0.471473	0.398778	0.496839	0.333045	0.778245	0.676524	0.51877	0.493714	0.326912	0.280664	0.466274	0.34436	0.312695
ENSG00000214973	0.0740499	0.0821764	0.173516	0.254387	0.726326	0.398353	0.62057	0.492548	0.0775621	0.866107	0.703831	0.402841	0.787352	0.480534	0.523618
ENSG00000198746	4.3219	4.74896	4.46495	4.75404	4.74606	4.8962	5.84328	6.04891	5.6865	4.2559	4.317	4.09235	3.90493	4.44082	4.21529
ENSG00000158006	4.74544	3.81108	4.55027	3.5822	3.57447	3.66967	5.41588	4.91269	5.40217	3.67813	3.83784	3.94031	3.91705	3.79724	3.7214
ENSG00000188529	10.1137	6.90448	7.45327	9.72933	7.6679	9.02843	6.57615	5.98035	8.08216	11.5357	11.2592	12.0117	11.7585	11.969	12.1258
ENSG00000214812	0	0	0	0	0	0	0	0.0808492	0	0	0	0	0	0	0
ENSG00000142784	12.764	14.2804	13.8742	9.61945	9.50129	9.24076	14.8995	15.1913	13.3022	7.32304	7.54437	7.41484	8.26203	7.72998	8.07477
ENSG00000230023	0	0	0.0300298	0	0	0	0	0	0.0268468	0	0	0	0.0227107	0	0
ENSG00000227950	0	0	0.194143	0	0	0	0	0	0	0	0	0	0	0	0
ENSG00000117682	7.55499	7.36188	8.00004	7.17799	7.06828	6.77938	8.36574	7.82135	7.44419	7.06275	6.78284	6.80916	7.41302	7.55223	7.48665
ENSG00000175793	50.1093	59.7098	57.1806	152.414	179.73	167.82	42.2063	48.4759	46.0724	128.137	129.258	129.325	119.202	117.696	120.123
ENSG00000126698	19.3206	15.2214	16.2236	23.2924	21.6409	25.3006	14.9864	14.7774	18.6921	27.8444	26.6865	28.9139	31.0875	31.7204	30.4093
ENSG00000229447	0.325345	0.12035	0.508238	0.279418	0.0967024	0.43755	0.113605	0	0.113592	0.230626	0.458126	0.393316	0.384367	0.60322	0.438202
ENSG00000229607	0.320216	0.118453	0.125056	0	0	0	0.111814	0.202851	0	0.113495	0.225451	0.387115	0.0945769	0.197903	0.539117
ENSG00000229994	1.92563	1.36528	1.31606	1.37817	1.47859	1.76246	1.23273	1.27068	2.68929	1.70627	1.58172	1.90761	1.84841	1.83474	1.72907
ENSG00000130766	2.94317	3.14464	3.92941	3.31541	3.80843	3.51637	3.62806	3.79828	3.5416	4.14836	4.42385	4.36896	4.5728	4.16249	4.45272
ENSG00000168528	9.19831	12.7826	13.0288	12.4275	13.7231	12.0291	13.0729	14.05	11.0007	11.4301	11.6281	10.5806	10.0966	10.9964	10.5261
ENSG00000196581	0	0	0	0	0	0	0	0	0	0	0	0	0.00335186	0	0
ENSG00000169403	0.0900987	0.162478	0.105561	0.15476	0.261106	0.287783	0.153373	0.224737	0.176948	0.586786	0.499551	0.476534	0.498956	0.334103	0.432319
ENSG00000117676	5.00982	5.16633	5.35056	5.34022	5.6307	5.17777	5.6193	6.09216	5.58489	7.02264	7.14517	6.79648	6.86547	7.23531	6.4439
ENSG00000198830	72.3436	62.5871	65.7977	81.6591	87.8308	90.0984	56.5109	70.2255	69.8755	125.213	117.098	125.159	133.574	133.14	128.909
ENSG00000225126	0	0	0	0	0	0	0	0	0	0	0	0	0	0	0
ENSG00000084628	0.0285493	0.0950474	0.0501732	0.0367788	0.101829	0.0287966	0.0897209	0.0542566	0.0299035	0.0151782	0.0603015	0.0517707	0.0379447	0.0529332	0.0432593
ENSG00000060688	7.25449	7.03584	6.74242	10.8483	10.7849	11.142	4.9173	4.75007	5.51695	15.0384	16.3529	15.3292	16.0968	15.3381	15.9989
ENSG00000236335	0	0	0	0	0	0	0	0	0	0	0	0	0	0	0
ENSG00000171612	1.21392	1.2791	1.20675	1.86397	1.47606	1.86345	1.13035	0.94377	1.18159	2.08607	2.14963	2.09012	2.59667	2.38713	1.74649
ENSG00000241169	0	0	0	0	0	0	0	0	0	0	0	0	0	0	0
ENSG00000278572	0	0	0	0	0	0	0	0	0	0	0	0	0	0	0
ENSG00000227001	3.15468	4.29655	3.10806	2.40147	3.70805	2.7963	3.15448	3.47456	3.00392	1.52471	2.65016	2.3836	1.90585	2.12694	1.6658
ENSG00000270927	0	0	0	0	0	0	0	0	0	0	0	0	0	0	0
ENSG00000226698	0	0	0	0	0	0	0	0	0	0	0	0	0	0	0
ENSG00000284744	0	0	0	0	0	0	0	0	0	0	0	0	0	0	0
ENSG00000162458	4.75989	5.27017	5.27047	5.5847	5.90518	5.99131	4.62111	4.26421	4.02731	3.33551	3.40493	3.37095	4.23685	4.34196	4.37915
ENSG00000188910	0.521672	0.489858	0.611198	1.06838	1.05558	0.98492	0.252221	0.228787	0.126096	1.74942	2.0766	1.78283	1.08447	1.37644	1.2769
ENSG00000230523	0.0220633	0	0	0.0189487	0.0196736	0.0296725	0	0.0209651	0	0	0	0.0133364	0	0.0204537	0
ENSG00000186056	0.529979	0.588141	0.620931	0.384362	0.409567	0.34846	0.518169	0.537173	0.505773	0.400729	0.323386	0.32747	0.406981	0.480398	0.428293
ENSG00000116138	2.77278	1.75658	2.13982	2.3576	1.9	2.07666	1.55958	1.29372	1.62316	2.21269	2.18601	2.26817	1.83406	1.72906	1.83936
ENSG00000231207	0	0	0	0	0	0	0	0	0	0	0	0	0	0	0
ENSG00000142765	2.38487	2.75962	2.7146	0.96944	0.961119	0.930251	4.16973	4.31459	3.32473	1.66047	1.703	1.50312	1.78226	1.92764	1.8347
ENSG00000158161	4.59607	3.18472	3.75122	4.51117	4.0917	4.59371	3.08353	2.69189	3.01362	5.30274	4.60456	4.94535	3.72595	3.87095	3.8901
ENSG00000270330	0	0	0	0	0	0	0	0	0	0	0	0	0	0	0
ENSG00000142684	0	0	0	0	0	0	0	0	0	0	0	0	0	0	0
ENSG00000060642	3.78522	3.28706	3.82018	2.93203	2.96504	3.09348	3.72849	3.83455	4.58187	2.35138	2.30136	1.96603	2.3027	2.21468	2.10344
ENSG00000224064	0	0	0	0	0	0	0	0	0	0	0	0	0	0	0
ENSG00000234619	0	0	0	0.061857	0	0	0	0	0	0	0	0	0	0	0
ENSG00000121769	0.915294	1.09098	0.794349	0.640516	0.574335	0.638276	0.852284	0.676461	0.603631	0.64882	0.680225	0.696696	0.720895	0.817095	0.719131
ENSG00000236963	0.0330411	0.0366672	0.0129038	0.0851306	0.0392832	0	0.0115374	0.0523274	0.0115361	0.0117108	0.0116315	0.0266293	0.0195176	0.0204204	0
ENSG00000232557	0	0	0	0	0	0	0	0	0	0	0	0	0	0	0
ENSG00000157330	0	0	0	0	0	0	0	0	0	0	0	0	0	0	0
ENSG00000162413	14.14	17.879	16.7355	11.3713	12.9882	11.4894	24.9775	26.5852	19.2344	10.5223	11.053	10.1576	9.49858	9.44138	9.42765
ENSG00000142627	17.0181	21.2861	20.6627	34.431	40.4221	33.7845	7.52896	7.61244	6.35331	35.0588	36.5013	34.0562	31.0809	30.6194	31.3069
ENSG00000284668	0	0	0	0	0	0	0	0	0	0	0	0	0	0	0
ENSG00000233234	0	0	0	0	0	0	0	0	0	0	0	0	0	0	0
ENSG00000142632	2.66486	2.62409	3.1515	1.88037	2.47663	2.1453	3.30271	3.01964	2.46364	1.82251	2.41795	2.12504	2.28363	2.05291	2.06003
ENSG00000234593	0.713034	0.64407	0.427414	0.583897	0.266152	0.535226	0.22582	0.204839	0.347374	5.80086	5.98922	5.96384	7.55212	7.40954	7.87285
ENSG00000162490	0.398954	0.407033	0.46742	0.840012	0.820507	0.718279	0.249407	0.250693	0.296558	0.246314	0.244645	0.237262	0.336393	0.345988	0.364008
ENSG00000158292	1.00474	1.29039	1.30943	1.70642	1.94282	1.50307	0.745038	1.05127	0.886847	1.15236	1.08494	0.85298	1.16034	1.16168	1.39128
ENSG00000270605	1.46196	1.18976	1.48447	0.795204	0.782171	0.753696	1.40386	1.89856	2.01622	0.906792	0.643319	0.942609	0.755642	0.903538	0.73841
ENSG00000238199	0.108448	0	0.12706	0.186279	0	0.072925	0	0	0	0.230626	0.229063	0.0655526	0.0960918	0	0.109551
ENSG00000142733	6.01265	7.50543	7.49868	7.12602	8.07524	6.65539	8.0525	8.45642	6.59157	8.98912	9.0066	8.39552	8.58697	8.57894	8.61492
ENSG00000189337	0.577867	0.686819	0.592908	0.519786	0.637238	0.519641	0.483561	0.3769	0.297265	0.487193	0.51278	0.558048	0.602917	0.548389	0.442123
ENSG00000270601	0	0	0	0	0	0	0	0	0	0	0	0	0	0	0
ENSG00000233268	0	0	0	0	0	0	0	0	0	0	0	0	0	0	0
ENSG00000232912	0.120692	0.178584	0.09427	0.103655	0.071747	0.108211	0.0842879	0.191142	0.042139	0.0427773	0	0.121589	0.178235	0.0745918	0.0406397
ENSG00000235084	1.69635	2.23549	4.3476	1.91217	2.93071	2.13881	4.33149	2.82086	1.55471	4.84752	4.47877	3.84517	4.13345	3.63664	4.06979
ENSG00000235143	0	0	0	0	0	0	0.0284176	0	0	0	0.0286492	0.0163975	0	0.0251486	0
ENSG00000225478	0	0	0	0	0	0	0	0	0	0	0	0	0	0	0
ENSG00000225077	0.401967	0.334561	0.47095	0.655925	0.573489	0.635202	0.315811	0.286469	0.547343	0.662486	0.827803	0.923296	0.819185	0.819813	0.812105
ENSG00000028137	0.802828	0.6682	0.999391	0.904965	1.07381	0.733863	0.341658	0.57215	0.591262	0.746939	0.874355	0.856816	0.333447	0.279097	0.240762
ENSG00000223944	0	0	0	0	0	0	0	0	0	0.0159821	0	0	0	0	0
ENSG00000238249	0.0637845	0.0707845	0	0.109561	0.0568761	0.128674	0.0668177	0	0.0668099	0	0	0	0.056517	0	0
ENSG00000187952	0.652887	1.74741	0.854923	0.725642	0.719156	0.439027	1.48856	0.474416	0.683854	0.93923	0.527271	0.626787	0.102088	0.10681	0.349159
ENSG00000237938	0.216401	0.0686144	0.217319	0.185853	0.165397	0.187093	0.194307	0.146879	0.161904	0.26297	0.22854	0.224239	0.356098	0.37257	0.187372
ENSG00000227409	0.206501	0	0	0	0	0	0	0	0	0	0	0	0.0914861	0	0
ENSG00000204464	0	0.282252	0.198658	0.072812	0.151195	0.285047	0.177623	0.24168	0.177602	0.0901462	0	0.153738	0	0.0785949	0
ENSG00000233372	0	0	0	0	0	0	0	0	0	0	0	0	0	0	0
ENSG00000162460	0	0	0	0	0	0	0.0344044	0.0312079	0	0	0	0	0	0	0
ENSG00000283259	0	0	0	0	0	0	0	0	0	0	0	0	0	0	0.0305902
ENSG00000142687	9.59761	8.61148	8.99922	7.88734	7.07318	7.19926	8.60888	8.2772	8.38597	6.6218	6.8475	6.68587	6.63999	6.73246	7.31119
ENSG00000284543	0.216555	0.170895	0.186061	0.0619952	0.0429112	0.0323601	0.332718	0.301805	0.34276	0.0716373	0.0254114	0.0290886	0.0383762	0.0401514	0.0486125
ENSG00000223382	0.942899	0.921809	1.39404	0.289213	0.400369	0.301925	0.823115	0.874634	1.29331	1.09807	0.995789	1.00419	0.855358	0.978173	1.15659
ENSG00000226166	0	0	0	0	0	0	0	0	0	0	0	0	0	0	0
ENSG00000130939	9.04022	7.4417	7.84455	8.53519	7.06375	7.74194	7.27189	6.4695	7.33553	7.13023	7.03857	7.15154	7.06461	7.04418	6.98643
ENSG00000236216	0	0	0	0	0.112391	0	0	0.239537	0	0	0	0.0761874	0	0	0.127323
ENSG00000175147	0.26916	0.175705	0.166951	0.118982	0.0952971	0.117114	0.182444	0.146687	0.186569	0.0462966	0.0501631	0.0502444	0.0561158	0.055042	0.0679739
ENSG00000236266	0.399691	0.12673	0.468283	0.0980769	0.203658	0.191977	0.657953	0.217026	0.119614	0.0607129	0.0603015	0.138055	0.252965	0.211733	0.115358
ENSG00000127472	0.0425421	0	0.0166143	0.0121789	0	0.00953567	0	0.0134749	0	0	0	0	0	0	0
ENSG00000231103	0	0	0	0	0	0	0	0	0	0	0	0	0	0	0
ENSG00000060656	10.0571	13.1994	12.6639	12.1886	13.5972	11.7467	14.0868	14.3685	10.029	6.25937	6.7263	5.99338	7.00707	7.00901	7.34368
ENSG00000163867	1.03521	0.472721	0.620942	0.689142	0.424003	0.762732	0.627834	0.414183	0.830096	0.66887	0.612027	0.730533	0.697821	0.725508	0.84059
ENSG00000232768	0.290748	0	0	0	0	0	0	0	0	0	0	0	0	0	0.293703
ENSG00000225294	0	0	0	0	0	0.0717753	0	0	0	0	0	0	0	0	0
ENSG00000230214	0	0	0	0	0	0	0	0	0	0	0	0	0	0	0
ENSG00000189280	0.524634	0.621023	0.409779	0.36046	0.374249	0.258709	0.549582	0.631459	0.439614	0.595031	0.886499	0.528533	0.495848	0.453936	0.777284
ENSG00000134698	2.76447	2.28141	2.21412	2.06169	1.6225	1.84177	2.56153	2.28107	2.40074	2.07052	2.13066	2.07236	1.95168	1.91174	1.97995
ENSG00000226487	0	0	0	0	0	0	0	0	0	0	0	0	0	0	0
ENSG00000134690	5.61376	5.79265	6.80793	18.304	19.0218	16.8613	5.22042	5.57765	5.30233	29.0705	30.3089	30.1348	31.1538	31.0244	29.7668
ENSG00000272420	0.500619	0.0925932	0	0.143317	0.0743996	0.056106	0	0.158567	0	0.0887178	0.0881166	0	0	0	0
ENSG00000224333	0.0470625	0.104455	0.110278	0.040419	0.0839304	0.0316467	0	0	0.0492947	0	0	0	0	0.0436291	0.0475408
ENSG00000226664	0	0	0	0	0	0	0	0	0	0	0	0	0	0	0
ENSG00000132881	2.22808	3.30794	2.89266	1.91356	1.74513	1.84244	2.33404	3.37604	2.45991	2.52919	1.6535	1.87458	2.241	1.81432	1.67284
ENSG00000273274	0.0110806	0.00409889	0.00865482	0.00317215	0	0	0.0193459	0.0105291	0.0309499	0.00785468	0.0117022	0	0.00327271	0.00342409	0.00373109
ENSG00000224321	0.773745	0.965992	0.679898	0.33226	0.431214	0.520297	1.11449	1.01094	1.11436	0.617041	0.30643	0.350773	0.685586	0.986286	0.586207
ENSG00000233621	0.612217	0.905873	0.680499	0.35053	0.587902	0.422235	0.937329	0.850242	0.73991	0.684352	0.513931	0.635745	0.542462	0.407475	0.364721
ENSG00000228940	0	0	0	0	0	0	0	0	0	0	0	0	0	0	0
ENSG00000116251	10.3825	6.22321	7.56997	8.75985	6.53134	8.60066	6.61941	6.06232	11.0878	7.70188	7.4673	8.36367	8.10138	8.68331	8.8461
ENSG00000272510	0.136971	0	0	0	0	0	0	0	0	0	0	0.0827933	0	0	0
ENSG00000158286	7.68906	7.32872	8.79812	4.73981	5.27997	4.55674	9.50003	9.86014	7.36129	4.51577	4.3258	3.86152	3.97954	3.88383	4.03605
ENSG00000236648	0	0	0	0	0	0	0	0	0	0.0379456	0	0	0	0	0
ENSG00000232273	0.0890825	0.197718	0.417481	0.306029	0.0794341	0.0599027	0.186637	0.253945	0	0.0947213	0.188159	0.0538468	0	0	0.089988
ENSG00000237276	0.928786	0.792858	1.17188	0.531784	0.509656	0.608539	1.39706	1.35778	1.07262	0.557094	0.352112	0.403066	0.464235	0.397398	0.408971
ENSG00000227959	0.838795	0.465424	0.552793	0.675363	0.42072	0.775554	0.329506	0.348707	0.274556	0.445944	0.775114	1.07741	0.743224	0.680402	0.688448
ENSG00000009709	0	0.00812497	0	0	0	0.00492325	0	0	0	0	0	0	0	0	0.00739589
ENSG00000043514	2.08197	1.61812	2.0483	2.07466	2.10874	2.26829	1.83901	1.73018	2.07434	2.21375	2.32899	2.60462	2.30111	2.36048	2.6454
ENSG00000186543	0.228395	0.50692	0.334488	0.0490384	0.101829	0.383954	0.29907	0.16277	0.0598069	0.364277	0.361809	0.0345138	0.303558	0.105866	0.057679
ENSG00000287396	0.142962	0.158651	0.0837481	0	0	0.0961334	0	0	0.0748714	0.0760056	0.301962	0.172829	0.19001	0.0662663	0.433245
ENSG00000231789	0.151412	0.448076	0.532189	0.130038	0.180017	0.305446	0.634448	0.767335	1.16302	0.214661	0.692921	0.183045	0.35776	0.421098	0.203934
ENSG00000162510	0.11323	0.20562	0.192963	0.0707244	0.07343	0.166125	0.215663	0.127157	0.0539094	0.0985068	0.0869682	0.0622209	0.182416	0.0667988	0.207965
ENSG00000179002	0	0	0	0	0	0	0	0.0177156	0	0	0	0	0	0	0
ENSG00000223589	0	0	0	0	0	0	0	0	0	0	0	0	0	0	0
ENSG00000188984	0	0	0	0	0	0	0	0	0	0	0	0	0	0	0
ENSG00000229259	0.0263142	0.0292021	0	0	0	0	0.0275656	0.0500089	0.0551247	0	0	0.0159059	0	0	0
ENSG00000270171	0	0	0	0	0	0	0	0	0.0288436	0	0.0290821	0	0.0243998	0	0
ENSG00000158008	1.17906	1.18108	1.00243	0.259876	0.223297	0.196458	1.72699	1.41782	1.24591	0.166419	0.143253	0.189211	0.231132	0.241824	0.274045
ENSG00000269732	0	0	0	0	0	0	0	0	0	0	0	0	0	0	0
ENSG00000130940	1.12878	1.04388	1.13146	0.660652	0.708292	0.601605	1.09487	0.981224	0.735663	0.737917	0.679934	0.674719	0.744568	0.728625	0.772836
ENSG00000116771	0.244999	0.390836	0.304984	0.907409	0.996738	0.957591	0.28873	0.101852	0.24058	0.634984	0.937936	0.860783	0.759793	1.03626	1.12917
ENSG00000237301	0.0666319	0.110917	0.0780668	0.0715323	0.0742688	0.0560074	0.0174501	0.142459	0.0872403	0.106274	0.123146	0.11076	0.0590399	0.0463282	0.0673091
ENSG00000162585	2.40085	2.15363	2.36526	2.18872	2.18341	2.09905	2.44226	2.38449	2.69663	2.25738	2.00824	2.02593	2.18885	2.04459	2.14019
ENSG00000163879	0.829571	0.802585	0.922094	0.61199	0.587984	0.643658	0.880162	0.697324	0.701819	0.0791611	0.146017	0.0642874	0.0942373	0.0690175	0.0644618
ENSG00000227527	0.501881	0.55696	0.336006	0.246305	0.319659	0.192849	0.375534	0.749414	0.300392	0.152471	0.302876	0.303367	0.317641	0.1994	0.072426
ENSG00000127129	1.83935	1.94552	2.155	0.740483	1.02508	0.618425	1.80639	1.42008	1.0536	3.30037	3.55117	2.98799	3.59059	3.38368	3.68705
ENSG00000228823	0	0	0	0	0	0	0	0	0	0	0	0	0	0	0
ENSG00000010803	10.2734	8.36141	8.72768	6.5167	6.13881	6.38511	10.014	9.37723	9.86767	5.97176	5.78498	6.04237	6.46832	6.51065	6.76065
ENSG00000229901	0.721704	0.800907	1.26834	0.206609	0.429025	0.404419	0.756024	0.914376	1.00791	0.511591	0.127031	0.436241	0.746053	0.334527	0.607533
ENSG00000169991	11.1596	9.66062	10.6036	11.2903	10.5733	10.7534	9.31206	8.85501	8.88519	12.706	12.952	12.485	13.123	12.116	12.5127
ENSG00000116954	2.29734	1.35697	1.8559	2.37879	1.88332	2.19888	1.78553	1.93652	3.14372	1.58582	1.58486	1.67422	1.62518	1.812	1.70309
ENSG00000117013	0.0215027	0.0596562	0.0125964	0.0369346	0.0287606	0.0289185	0.0788382	0.051081	0.0450452	0.102887	0.136253	0.0974812	0.0857371	0.059802	0.0434425
ENSG00000228589	6.88957	11.121	5.54435	6.03655	5.58488	4.9136	4.22826	8.59661	12.3188	14.3553	7.93748	5.59469	6.78287	7.4192	11.4587
ENSG00000163873	0	0	0.00528961	0	0	0	0	0	0	0	0	0	0	0	0
ENSG00000233431	0	0	0	0	0	0	0	0	0	0	0	0	0	0	0
ENSG00000117215	0.0353539	0.0196169	0.0207106	0.0151816	0	0	0.0740702	0.0503913	0.0185154	0	0	0	0.0469886	0	0
ENSG00000223583	0.177166	0.196609	0.103785	0.0760783	0.0789887	0.0595668	0.185591	0.0841738	0.0927846	0	0.0935518	0.214179	0	0	0.178967
ENSG00000196449	3.43643	3.38666	3.45529	4.40497	5.44244	4.72505	1.96111	2.92422	2.31008	5.01736	5.41669	5.08444	5.54442	6.98959	7.09814
ENSG00000250575	0.229501	0.127344	0.224072	0.229954	0.136429	0.154326	0.160276	0.218077	0.440708	0.0813425	0.121187	0.115603	0.271136	0.141839	0.193195
ENSG00000237700	0	0	0	0	0	0	0	0	0	0	0	0	0	0	0
ENSG00000253368	2.65816	2.84358	2.86182	3.39354	3.4593	3.65543	2.5337	2.84443	3.38624	5.34728	4.80523	4.83473	5.64422	5.28369	5.87837
ENSG00000179862	1.51944	2.81031	2.3312	1.55351	1.67745	1.65423	2.72861	3.9189	4.47137	1.50021	1.45184	1.35579	1.41042	0.570143	0.877074
ENSG00000116661	38.4319	59.2772	56.0165	38.1025	46.0533	39.5053	71.7608	86.6632	63.4975	18.2098	18.4662	16.9089	21.2815	21.3075	21.22
ENSG00000230163	0	0	0	0	0	0	0	0	0	0	0	0	0	0	0
ENSG00000287400	0.0320432	0	0.0125141	0.0183466	0	0.00718238	0.011189	0.0405977	0	0	0.0225604	0	0.0189282	0.00990186	0
ENSG00000227538	0	0	0	0	0	0	0	0	0	0.0444763	0	0	0	0	0
ENSG00000232208	0	0	0	0.693782	0	0.181069	0	0	0.141022	1.28842	0	0.081382	0.119296	0	0.136005
ENSG00000162461	0.227163	0.173314	0.199611	0.0609675	0.177239	0.114565	0.237966	0.215856	0.148711	0.256638	0.104959	0.128729	0.0503201	0.105295	0.14342
ENSG00000236500	0	0.233746	0	0	0	0	0	0.200147	0	0	0	0	0	0	0
ENSG00000044012	0	0	0	0	0	0	0	0	0	0	0	0	0	0	0
ENSG00000179051	30.882	27.7857	31.4038	37.5787	35.846	38.6888	22.1634	21.3297	21.8079	41.5463	42.7863	42.8609	40.6229	38.9153	37.9914
ENSG00000215895	0.241795	0.134166	0.141645	0.0622988	0.107803	0.146334	0.126647	0.045952	0.126632	0.15426	0.153215	0.0876933	0.149972	0.156909	0.146552
ENSG00000231868	1.89028	1.79805	2.05648	0.695759	0.722375	0.726341	2.54593	1.66789	1.13139	0.287132	0	0.326456	0.239271	0.375509	0
ENSG00000284650	0	0	0	0	0	0	0	0	0	0	0	0	0	0	0
ENSG00000237329	0	0	0	0	0.083351	0	0	0.0888225	0	0	0.0987184	0.0565019	0	0	0
ENSG00000236948	0	0	0	0	0	0	0	0	0	0	0	0	0	0	0
ENSG00000270850	0	0	0	0	0	0	0	0	0.145571	0	0	0.0840073	0.123144	0	0
ENSG00000053372	10.9394	10.4939	10.1231	17.4528	19.3108	19.662	9.53677	8.61547	9.71044	23.5989	24.6726	24.1186	23.559	24.58	25.173
ENSG00000287510	0	0	0	0	0.0784753	0	0	0	0	0.0935779	0.0464719	0	0	0	0.0444509
ENSG00000126067	20.085	22.7074	21.4963	30.6523	36.8179	32.9099	19.2201	19.7019	19.8318	28.8907	27.8438	28.3871	27.6269	27.886	27.3095
ENSG00000274944	0.0145776	0	0	0	0	0.0294078	0.0152709	0	0	0	0	0.00881159	0.0129167	0	0
ENSG00000066136	5.85476	7.4631	6.9244	5.61944	6.18011	6.22468	8.24663	9.26221	7.57441	5.89726	6.54246	6.6236	5.38397	5.7797	5.82635
ENSG00000132906	3.44489	4.03256	4.0993	3.22124	3.69736	2.88501	4.26826	4.55544	3.91918	1.49195	1.99479	1.71259	1.76926	1.64265	2.01707
ENSG00000286668	0	0	0	0.0300605	0	0	0	0	0	0	0	0	0	0	0
ENSG00000197312	2.61905	1.82248	1.87393	2.49332	2.03001	2.17985	1.42275	1.17223	1.34514	2.37517	2.33853	2.62048	2.0965	2.1069	2.15427
ENSG00000284748	0	0	0.0418741	0	0	0	0	0	0	0.0380028	0	0	0	0	0
ENSG00000272078	0.0717787	0.0796561	0.0560646	0.0308231	0.0533371	0.0402224	0.0751921	0.0284192	0.0626527	0.0572416	0.0505366	0.0433873	0.0424002	0.0831779	0.0664659
ENSG00000173660	77.2195	77.6147	85.1301	94.5462	105.726	105.348	74.9311	80.1594	90.8396	113.297	99.0181	100.701	97.7938	97.4685	101.459
ENSG00000224592	0	0.15378	0.243531	0.0595057	0.0617821	0.0931819	0.0725812	0.131675	0.145145	0	0.0731728	0.167523	0.122784	0.128464	0.139981
ENSG00000233728	0	0	0	0	0	0	0	0	0	0	0	0	0	0	0
ENSG00000230451	0	0	0	0	0	0	0	0	0	0	0	0	0	0	0
ENSG00000215893	0.0949738	0.210793	0	0	0	0.0638642	0	0	0	0	0.100301	0	0	0	0
ENSG00000231606	0	0.0339528	0.0358457	0.0525525	0.0545629	0.144014	0	0	0	0.0325318	0	0	0	0.0283632	0
ENSG00000215900	0	0	0	0	0	0	0	0	0	0	0	0	0	0	0
ENSG00000092847	4.55495	3.86969	3.83758	3.21747	2.77771	2.76008	3.60636	3.11567	2.9984	3.34494	3.34389	3.38231	3.31342	3.24527	3.36391
ENSG00000284632	0	0	0	0	0	0	0	0	0	0	0	0	0	0	0
ENSG00000204510	0	0	0	0	0	0	0	0	0	0	0	0	0	0	0
ENSG00000241014	0.0753449	0.139356	0.0882751	0.0647089	0	0.10133	0.236783	0.0954595	0.184143	0	0.0795711	0.0759048	0.0890135	0.116414	0.152221
ENSG00000054118	27.8026	17.9507	22.9629	29.0863	22.8574	27.0745	18.7854	18.7383	24.4518	31.9325	29.712	33.2105	32.2058	31.9084	32.2031
ENSG00000254553	0	0	0	0	0	0	0	0	0	0	0	0.00831055	0	0	0
ENSG00000230415	5.72768	6.35626	5.84474	2.38023	2.55366	2.67122	9.2904	8.25166	5.99935	1.6699	2.53666	2.28948	2.21011	2.65491	1.67978
ENSG00000177181	0.0757344	0.039551	0.0678535	0.0229565	0.0198623	0.0119828	0.051335	0.0338658	0.0513289	0.0947391	0.112916	0.164264	0.0907895	0.0825993	0.0765042
ENSG00000284653	0	0	0	0	0	0	0	0	0	0	0	0	0	0	0
ENSG00000237749	0.749279	0.207877	0.438933	0.321754	0.334063	0.251923	0	0.533988	0.196205	0.995883	0.791308	0.226454	0.331954	0.347309	0
ENSG00000224863	0.134331	0.178887	0.125907	0.230736	0.26352	0.108395	0.112575	0.0765867	0.112562	0.114267	0.141866	0.227353	0.0714152	0.0996248	0.217114
ENSG00000276747	0.0593388	0.0439006	0	0	0.0176373	0	0.0207202	0.0187951	0.0414355	0	0	0	0	0	0
ENSG00000284705	0	0	0	0	0	0	0	0	0	0	0	0	0	0	0
ENSG00000287828	0.325494	0.433458	0.152541	0.838638	0.754624	0.5253	0.61375	0.371151	0.545492	0.415316	0.618753	0.275447	0.807541	0.724196	0.394563
ENSG00000228776	0	0	0	0	0	0	0	0	0	0	0	0	0	0	0
ENSG00000236009	0	0	0	0	0	0	0	0	0	0	0	0	0	0	0
ENSG00000228526	1.42143	1.14832	1.19957	1.14594	1.0101	1.19021	1.48332	1.29375	1.19793	0.955485	0.747705	0.770314	0.796219	0.732074	0.709687
ENSG00000159339	3.81241	4.30161	4.09289	9.75421	10.6536	9.72887	1.87153	1.97048	1.8546	1.20424	1.07816	1.02206	0.819772	0.975995	0.741227
ENSG00000284678	0.0704189	0	0	0.0604783	0.125584	0.094705	0.147535	0.0669138	0	0	0	0.0425654	0.0623954	0.0652816	0.0711346
ENSG00000162373	0	0	0	0	0	0	0	0.0210238	0	0	0	0	0	0	0
ENSG00000223814	0	0	0	0	0	0	0	0	0	0	0	0	0	0	0
ENSG00000197982	4.54588	4.479	5.25136	5.18124	5.64463	5.58515	4.94008	5.30869	5.963	5.14985	6.01231	5.72673	7.3218	6.2623	5.87959
ENSG00000225158	0	0	0	0	0	0	0	0	0	0	0	0	0	0	0
ENSG00000261781	0	0	0	0	0	0	0	0	0	0	0	0	0	0	0
ENSG00000183317	0.755759	0.748378	0.885458	0.499287	0.585778	0.605934	0.755158	0.745762	0.639374	1.08177	1.15425	1.08584	1.1178	0.991653	1.12167
ENSG00000250894	0	0	0	0	0	0	0	0	0	0	0	0	0	0	0
ENSG00000232022	2.29686	2.16659	2.19768	1.03563	1.63847	1.60886	2.66674	2.21891	3.00726	1.05831	0.990493	1.12226	1.08542	0.692022	1.06343
ENSG00000183386	12.2973	14.2242	14.6016	9.80989	11.0497	9.77992	12.8078	12.2245	11.7411	6.2361	6.56847	6.20388	4.71469	4.53815	4.1328
ENSG00000284743	0	0	0	0	0	0	0	0	0	0	0.0742585	0	0	0	0
ENSG00000229528	0.10062	0	0.117887	0	0	0	0.316214	0.0956115	0	0	0	0	0	0.186559	0
ENSG00000158315	0.553409	0.316376	0.37331	0.388872	0.523377	0.349581	0.527023	0.605539	0.702615	0.356629	0.371923	0.273692	0.312043	0.342024	0.457391
ENSG00000232514	0	0	0	0	0	0	0	0	0	0	0	0	0	0	0
ENSG00000229213	0	0	0	0	0	0	0	0	0	0	0	0	0	0	0
ENSG00000243749	0	0	0	0.0441452	0	0	0	0.0488427	0.0538392	0	0	0	0	0	0
ENSG00000204084	1.68764	1.53715	1.5358	1.30355	1.31083	1.3668	1.63447	1.49774	1.47307	1.25838	1.26106	1.33769	1.27904	1.28901	1.30808
ENSG00000286064	1.67759	2.48226	1.31032	1.6809	1.74521	1.88013	0.878683	0.531363	1.31787	1.63513	1.62405	1.09854	0.619353	1.4256	1.4122
ENSG00000235358	0.105222	0.116769	0.172591	0.054221	0.0750603	0.113209	0.0661353	0.0999845	0.154298	0.0447528	0.0222248	0.0127205	0.11188	0.0585274	0.0425165
ENSG00000186973	0	0	0	0	0	0	0	0	0	0	0	0	0.0498127	0	0
ENSG00000233118	0	0	0	0	0	0	0	0	0	0	0	0	0	0	0
ENSG00000271806	0.0564727	0.0250681	0.0529314	0	0.0100712	0.0151898	0.0236633	0.0107324	0.0118303	0.0360284	0	0.0136542	0	0.0104706	0.0114093
ENSG00000142698	0.0141934	0.0157511	0	0.0121898	0	0	0	0	0	0	0	0	0	0	0
ENSG00000272084	0	0.0463782	0.0816064	0.0478564	0.0496872	0.11241	0.0729653	0.0661861	0.0875481	0.0592495	0.058848	0.0673639	0.0740602	0.038743	0.0422166
ENSG00000146463	8.60908	6.29385	6.71498	6.15806	4.85938	5.61977	5.83437	5.00746	6.4742	5.80094	6.21117	6.4142	6.26828	5.86906	6.1409
ENSG00000279214	0	0	0	0	0	0	0	0	0	0	0	0	0	0	0
ENSG00000183520	4.30326	2.19332	3.00535	5.95902	4.02466	6.03243	2.05572	1.93132	3.56772	7.73537	7.002	7.91358	9.20324	7.97865	8.63736
ENSG00000271164	0	0	0	0	0	0	0	0	0	0	0	0	0	0	0
ENSG00000090686	6.54714	4.61856	5.52502	5.73007	4.43637	5.29515	4.89294	4.59007	6.32976	5.36974	5.06985	5.28468	5.359	5.56063	5.42403
ENSG00000085998	12.7803	14.2848	15.7272	13.3897	14.5165	13.6144	14.2062	14.5453	13.0977	10.194	10.5616	9.74786	10.4488	11.0528	11.162
ENSG00000271741	0	0	0	0	0	0	0	0	0	0	0	0	0	0	0
ENSG00000226957	0.146046	0.324147	0.0855547	0	0.130228	0.0491036	0.305982	0.0693883	0	0	0	0	0.129406	0	0.0737652
ENSG00000211454	0.171214	0.209004	0.140417	0.338202	0.229004	0.345393	0.251098	0.292845	0.322802	0.218461	0.198899	0.165587	0.0910234	0.253957	0.172954
ENSG00000214141	0.0500972	0	0.0293473	0	0.0223356	0	0	0.0238018	0.0262367	0	0.0264536	0	0	0	0
ENSG00000142686	5.70444	7.15843	6.66519	7.72922	8.03876	7.87037	5.38953	6.02606	4.9656	6.06552	6.10649	5.98485	6.294	6.19608	6.09215
ENSG00000224751	0	0.0801721	0.0423209	0.0310228	0.0322096	0	0	0.0343239	0	0	0	0.0436684	0	0.0334867	0
ENSG00000286597	0	0	0	0	0	0	0	0	0	0	0	0	0	0	0
ENSG00000279096	0	0	0	0.0152499	0	0	0	0	0	0	0	0	0	0	0
ENSG00000227857	0.139799	0.310283	0.327581	0.480258	0.623288	0.376026	0.732235	0.265681	0.14643	0.594592	0.295282	0.169006	0.371612	0.518402	0.42366
ENSG00000213987	0.151412	0.168028	0	0	0	0	0	0	0.158593	0	0	0.183045	0	0	0
ENSG00000117148	0.231305	0.0855633	0.180667	0.397307	0.297921	0.432053	0.134614	0.0976855	0.107678	0.847149	0.705697	0.963168	0.819803	0.643293	0.726931
ENSG00000230585	0.175309	0	0	0	0	0.039295	0	0.0555277	0.0612081	0	0.123428	0.0706448	0.0517782	0.0541733	0
ENSG00000127125	8.51443	5.5799	6.68839	6.91885	5.16471	7.14513	5.82011	5.55653	8.80189	6.1882	6.29295	6.38921	5.84592	6.38673	5.94912
ENSG00000197429	2.70957	2.32612	2.5157	2.29415	1.93744	1.75327	1.95476	1.17805	1.92776	2.13363	2.17316	2.19407	1.99315	2.14459	2.36269
ENSG00000117000	4.18253	2.43892	2.99365	4.24522	3.23452	4.05512	2.23055	1.52471	2.85158	4.52814	4.05574	4.66563	3.95529	4.0748	3.97922
ENSG00000284989	0	0	0	0	0	0	0	0	0	0	0	0	0	0	0
ENSG00000178585	1.36257	2.01614	1.91236	3.42535	4.13857	3.8177	1.29355	1.551	1.50153	3.22966	3.26773	2.87409	2.47752	2.32897	2.25102
ENSG00000231630	0.110471	0.122594	0	0	0	0	0	0	0	0	0.233334	0.066775	0.0978838	0	0.111593
ENSG00000092853	0.296477	0.208376	0.1621	1.40893	1.03103	1.2726	0.077644	0.0704301	0.11904	3.15769	2.66141	3.18095	3.27058	3.1745	3.43416
ENSG00000255811	0.0846284	0	0.0991518	0.218046	0	0	0.265958	0	0.0886424	0	0.0893754	0.0511544	0.224958	0.156909	0
ENSG00000236253	0	0	0	0	0	0	0	0	0	0	0	0	0	0	0
ENSG00000198754	0.0259539	0.0288023	0	0.0445804	0.0694287	0.0872624	0.0543763	0.0246621	0.0543699	0.110387	0.109639	0.125505	0.0689904	0.0240605	0.0786532
ENSG00000134697	7.57017	5.60979	6.69546	9.44777	9.15476	10.2142	5.3386	4.47431	6.09808	10.9604	10.8339	11.8733	10.7921	10.7715	10.8459
ENSG00000187513	0.193324	0.183891	0.0647145	0.166033	0.0492529	0.129999	0.202517	0.078729	0.0867828	0.176195	0.233334	0.166938	0.0489419	0.153617	0.195289
ENSG00000278139	0	0	0	0	0	0	0	0	0	0	0	0	0	0	0
ENSG00000238145	0	0	0	0	0	0	0.041649	0	0	0	0	0	0	0	0
ENSG00000225142	0	0	0	0	0	0	0	0	0	0	0	0	0	0	0
ENSG00000230138	0	0	0	0	0	0	0	0	0	0	0	0	0	0	0
ENSG00000230116	0	0	0	0	0	0	0	0	0	0	0	0	0	0	0
ENSG00000223390	0	0.0690196	0.0728675	0	0	0.0418218	0	0.177295	0.260576	0.0661308	0	0.0375938	0.110216	0	0
ENSG00000285823	0	0	0	0	0	0	0	0	0.0346889	0	0.0349757	0	0	0	0
ENSG00000284720	0	0	0	0	0	0	0	0	0	0	0	0	0	0	0
ENSG00000225028	0	0.0291051	0	0.0450491	0.0467725	0.0705439	0.027474	0	0	0.0557739	0.0830939	0	0	0.0243135	0
ENSG00000286640	0	0	0	0.0301943	0	0	0	0	0	0	0	0	0.0311514	0	0
ENSG00000225671	0.238951	0	0.186639	0.20522	0.0710235	0.10712	0.0834379	0	0.0834282	0	0.168236	0.144436	0.070575	0.147679	0.16092
ENSG00000116151	0.986548	1.09945	0.969741	0.761119	0.730595	0.784267	0.810129	0.869915	0.726841	0.826749	0.728437	0.821214	0.892662	0.852571	0.950125
ENSG00000226147	0	0	0	0	0	0.0244952	0	0	0	0	0	0.0220188	0	0	0
ENSG00000182873	1.5852	1.3952	1.63309	1.07975	1.14543	1.08433	2.34771	2.10362	2.31881	1.07526	0.808193	0.974707	1.30771	0.912136	1.24239
ENSG00000286518	0.017023	0	0	0	0.0151792	0.0228938	0	0	0	0	0.0179778	0	0	0.0157811	0.034392
ENSG00000178715	2.16401	3.48218	3.16924	3.06658	5.59593	4.07448	4.1938	5.34638	2.83332	3.79664	3.19956	2.02749	1.82158	2.70829	1.85811
ENSG00000284641	0	0	0	0	0	0	0	0	0	0	0	0	0.0313374	0	0
ENSG00000006555	0.845315	1.06718	0.990382	0.812573	0.91281	0.881317	1.09674	0.957992	0.926024	0.783376	0.794448	0.806283	0.755872	0.704563	0.712895
ENSG00000236111	0	0	0	0	0	0	0	0	0	0.0739966	0	0	0	0.193544	0
ENSG00000066056	0.0636133	0.0549068	0.0414057	0.0303519	0.0189078	0.0142587	0.118468	0.194774	0.162875	0	0.0223938	0.00427241	0.0187884	0.02621	0.00713999
ENSG00000214114	3.9479	2.63628	3.26382	4.19789	4.51087	5.20602	2.45274	2.40349	3.32961	5.59706	5.28839	6.01235	6.20872	6.73357	6.71577
ENSG00000173436	0.458352	0.287917	0.283704	0.415932	0.285325	0.377999	0.335198	0.197225	0.344217	0.303454	0.310531	0.240463	0.291186	0.248535	0.218402
ENSG00000116544	0.0351746	0.0780696	0.0686851	0.0201395	0.010455	0.0157685	0.0122824	0.0445651	0.012281	0.0498681	0.0371476	0.0779592	0.0519447	0.043478	0.0236881
ENSG00000231900	0	0	0	0.0310939	0	0	0	0	0	0	0	0	0	0	0
ENSG00000236723	0	0.128589	0.0905053	0.165859	0.103323	0.10389	0	0	0.202281	0	0.0407907	0.0466935	0.0342234	0.071613	0.11705
ENSG00000204060	3.35973	3.96969	4.76987	0.848663	0.810639	0.717633	5.15502	5.82161	5.32002	0.88259	0.855738	0.788435	1.33086	0.952709	1.17787
ENSG00000232467	0	0	0	0	0	0	0	0	0	0	0	0	0.0698704	0	0
ENSG00000186094	0	0.0140173	0.00739939	0.00542403	0	0	0	0.0060012	0.0132302	0	0	0.0038175	0.00559597	0	0.00637975
ENSG00000117016	0.60717	0.673804	0.711369	0.667244	0.593803	0.504869	0.656561	0.459077	0.5881	1.13848	1.18593	1.14838	0.937144	1.13786	1.04202
ENSG00000270241	0	0	0	0	0	0	0	0	0	0	0	0	0	0	0
ENSG00000121310	6.44615	6.18553	6.89504	3.23941	3.44367	3.42035	7.88958	7.44842	7.70849	3.07872	3.04921	3.25281	2.87399	2.97276	3.01175
ENSG00000169213	0	0.0123458	0.00868936	0.00636962	0.0132266	0.024936	0.00388463	0.00352371	0.00776835	0.0394301	0.0430792	0.0403472	0.0657154	0.0721929	0.0674276
ENSG00000229846	0	0	0	0	0.05329	0	0.0626047	0	0	0	0	0	0	0	0
ENSG00000163866	2.12729	2.29461	2.32585	3.26025	3.53623	3.35423	2.03635	2.00834	1.91125	3.07118	3.28278	3.15369	3.28235	2.98791	3.14464
ENSG00000225779	0.128086	0	0	0	0	0.0861303	0	0.121711	0	0	0	0	0	0	0.129388
ENSG00000236546	0.0603719	0	0.0707325	0	0.0538331	0	0	0	0	0	0	0.0364923	0.106986	0	0
ENSG00000233114	0	0	0	0	0	0	0	0	0	0	0	0	0.185806	0	0
ENSG00000228436	0.567568	0.708587	0.609556	0.446827	0.337397	0.41346	0.693651	0.921334	0.693569	0.22631	0.174826	0.314482	0.230496	0.241158	0.23889
ENSG00000284601	0	0	0	0.0234864	0	0.0551671	0	0	0.0286438	0	0.0288807	0	0	0	0
ENSG00000049249	0.865197	0.736665	0.672872	1.98577	1.7558	1.74036	0.578183	0.382717	0.515616	0.999269	0.834958	0.79799	0.746791	0.719105	0.610287
ENSG00000284719	0.625008	0.211095	0.509404	0.39675	0.436159	0.347188	0.398531	0.180752	0.426947	0.317838	0.20089	0.262812	0.481561	0.226726	0.219604
ENSG00000237130	0	0	0	0	0	0	0	0.121711	0	0	0	0	0	0	0
ENSG00000171793	1.46879	1.38973	1.43239	4.15623	4.05404	4.15337	0.631465	0.532458	0.733658	5.58804	5.50535	5.86837	5.81511	6.03293	5.82339
ENSG00000116990	0.252732	0.186979	0.120635	0.136664	0.125199	0.125887	0.117667	0.106734	0.137262	0.258776	0.296565	0.260268	0.340051	0.329748	0.425501
ENSG00000143001	0.830113	1.33995	1.19361	0.648119	0.77385	0.938793	1.26486	1.72101	1.46232	0.320966	0.199245	0.342116	0.300899	0.244858	0.266812
ENSG00000229716	0.128433	0	0	0	0	0	0	0.122041	0	0	0	0	0.1138	0	0
ENSG00000236876	3.86156	4.28535	3.70167	5.72842	5.00847	6.13758	2.20647	5.67082	5.51553	4.47926	4.81965	3.60733	2.48842	3.57985	2.48234
ENSG00000226133	0.0962598	0.0356079	0.0375931	0.0551143	0	0.0215763	0	0.0304895	0	0.0682352	0	0.019395	0	0.0297458	0.0972382
ENSG00000227416	0	0	0	0	0	0	0	0.104972	0.11571	0	0	0	0	0	0
ENSG00000232335	0	0	0	0	0	0	0	0	0	0	0	0.0531475	0	0	0
ENSG00000260971	0.0300786	0.00667592	0.0140962	0.0154996	0.0375492	0.0121357	0	0.0057163	0.00630106	0.012793	0	0.0109088	0.0266515	0.0111537	0.0121537
ENSG00000274386	0.368471	0.264588	0.241247	0.158228	0.173945	0.240487	0.32923	0.257449	0.283785	0.241991	0.228906	0.314437	0.403309	0.411918	0.426954
ENSG00000259832	0	0	0	0	0	0	0	0.22976	0	0	0	0	0	0	0
ENSG00000284696	0	0	0	0	0	0	0	0	0	0	0	0	0	0	0.0136353
ENSG00000238242	0	0	0	0	0	0	0	0	0	0	0	0	0	0	0
ENSG00000285839	0	0	0	0	0	0	0	0	0	0	0	0	0	0	0
ENSG00000237290	0	0	0	0	0	0	0	0	0	0	0	0	0	0	0
ENSG00000232762	0.126042	0.209812	0.221509	0.595374	0.168586	0.42378	0.066018	0.119769	0	0.670102	0.332781	0.457125	0.223362	0.350542	0.254647
ENSG00000117419	13.103	14.3899	14.0557	15.6669	16.3422	15.4707	13.7974	14.1809	14.2948	16.8636	16.9829	15.8507	19.9331	19.0094	17.843
ENSG00000162384	6.03973	6.86604	6.95295	4.84374	5.95791	5.31373	7.80397	7.77879	8.23288	5.52698	5.03392	5.10727	5.31428	5.22845	5.29331
ENSG00000162391	0.0945003	0.104871	0.193756	0.10145	0.0210663	0.0635458	0.148491	0.224492	0.148474	0.100482	0.0748508	0.071402	0.0627998	0.131409	0
ENSG00000174348	0	0.0107354	0.0113339	0	0	0	0.0101338	0	0.0202653	0.0102861	0.0204328	0	0	0	0
ENSG00000154198	0.148285	0	0.173733	0	0	0.0199426	0.186404	0	0	0	0	0	0	0.0274935	0
ENSG00000117859	16.8199	13.9098	14.2366	9.83375	9.1075	10.1285	14.899	13.861	16.5498	8.78532	8.45295	8.9874	9.45058	9.5456	9.60455
ENSG00000228121	0.0578656	0.064216	0.0677961	0	0	0	0	0	0	0.0615283	0	0	0	0.0536441	0.0584537
ENSG00000253313	0.0622758	0.0691103	0.0364816	0.0267424	0	0	0.0978559	0.0887641	0.130459	0.198653	0.065769	0.0752864	0.0827703	0.086599	0.0943632
ENSG00000040487	4.94033	6.75523	6.82176	5.72797	6.18309	5.60007	7.00509	7.66198	6.06174	5.15924	5.32925	5.24723	4.97152	5.07063	5.31137
ENSG00000162396	3.76158	4.44227	4.24215	3.28241	3.7129	3.42218	4.5094	4.4536	4.80385	3.27247	3.50522	3.65984	3.8677	3.46852	3.35278
ENSG00000203995	1.85771	1.00839	1.17106	1.66484	1.47645	1.48003	0.973028	0.671562	0.898888	2.19001	2.02589	2.27634	2.14702	2.07786	1.98878
ENSG00000227742	0.893856	0.505701	0.554429	0.195682	0.18754	0.164998	0.624242	0.699477	0.936253	0.260904	0.129568	0.158912	0.264004	0.227472	0.247866
ENSG00000117713	5.75042	6.24291	6.00572	5.19148	4.84126	4.78653	5.93043	5.59981	4.34764	7.11345	7.34786	6.89248	6.30712	5.89873	6.03113
ENSG00000230114	0	0	0	0	0	0	0	0	0	0	0	0	0	0	0
ENSG00000177868	2.38186	1.98244	1.88777	1.71471	1.74908	1.83719	2.0915	2.13016	3.70555	2.08569	1.81261	1.41856	1.80011	2.14315	1.83993
ENSG00000284686	0.0178501	0	0.0627401	0.0306606	0.0318335	0.0120031	0.0186989	0.0169616	0.0186967	0.0569398	0.0188513	0.0215793	0	0.0496436	0.0901575
ENSG00000162378	5.48074	2.961	3.66738	3.63569	2.10625	2.88934	3.0794	2.32135	3.48434	3.50028	3.18379	3.64103	3.91981	3.53896	3.90876
ENSG00000233079	0	0	0	0	0	0	0	0	0	0	0	0	0	0	0
ENSG00000162599	0.122114	0.1054	0.108296	0.0975925	0.0846903	0.112907	0.0612952	0.0580177	0.0781645	0.130745	0.121799	0.143012	0.114963	0.132859	0.118215
ENSG00000259818	0	0.0146458	0	0.0113344	0	0.00887447	0	0.025081	0.0276468	0	0	0	0	0.0122346	0.0133316
ENSG00000229444	0	0	0	0	0	0	0	0	0	0	0	0	0	0.187354	0
ENSG00000240563	0	0	0	0	0	0	0	0	0	0	0	0	0	0	0
ENSG00000234318	0.106022	0.117658	0	0	0	0.0712936	0	0	0	0	0.111969	0.128172	0	0	0
ENSG00000284773	0.209765	0.0498826	0.122882	0.0900769	0.0534416	0.0705272	0.204044	0.0854246	0.141245	0.0955897	0.158237	0.0996242	0.185865	0.111121	0.166491
ENSG00000234481	0	0	0	0	0	0	0	0	0	0	0	0	0	0	0
ENSG00000117862	4.74912	6.6292	5.64168	5.08774	7.36286	5.08512	5.72033	6.90275	4.29841	7.10833	5.87181	5.48124	5.65955	5.10831	5.4493
ENSG00000162551	0.42939	0.794188	0.577609	0.273167	0.368702	0.235269	0.899618	0.785811	0.533044	0.388929	0.352703	0.240323	0.380466	0.589725	0.562274
ENSG00000235612	0	0	0	0	0	0	0.0679146	0	0	0	0	0	0	0	0
ENSG00000228369	0	0.134509	0	0	0	0.0815044	0.126971	0.115174	0.253912	0	0.128006	0	0.214794	0.337094	0
ENSG00000183431	18.3774	16.6396	17.3961	25.4204	24.3309	26.1313	15.1971	14.5368	17.6684	28.3922	28.1484	28.0285	30.6584	30.1923	31.51
ENSG00000227485	0	0	0	0	0	0	0	0	0	0	0	0	0	0	0
ENSG00000224609	0.0687655	0.0208124	0.0292969	0.0429515	0.0724662	0.0630554	0.0523895	0.00594025	0.0327396	0.0664711	0.0990309	0.0755744	0.0498522	0.0927256	0.145244
ENSG00000235545	0.0771855	0	0.0904316	0.198869	0.103238	0.207611	0	0.146687	0.12127	0.164142	0.081515	0.303261	0.0683911	0.0357773	0.038985
ENSG00000236646	0	0.389577	0	0	0	0	0	0	0.183851	0	0	0	0	0	0
ENSG00000169174	0.0165967	0.0184181	0	0.0498885	0.0887949	0.0781221	0.00869297	0.00788531	0	0.0176472	0.0438191	0.0300961	0	0	0.0083827
ENSG00000288527	0	0	0	0	0	0	0	0	0	0	0	0	0	0	0
ENSG00000231252	0	0	0	0	0	0	0	0	0	0	0	0	0	0	0
ENSG00000232198	0	0	0	0	0	0	0	0	0	0	0	0	0	0	0
ENSG00000236180	0.11257	0	0	0	0	0	0.117923	0.106967	0	0	0	0	0.0997438	0	0
ENSG00000231622	0	0	0	0	0	0	0	0	0	0	0	0.167523	0	0	0
ENSG00000238063	0	0	0	0	0	0	0	0	0	0	0	0	0	0	0
ENSG00000235804	0	0	0	0	0	0	0	0	0	0	0	0	0	0	0
ENSG00000227104	0	0	0	0	0	0	0	0	0	0	0	0	0	0	0
ENSG00000243725	0.38044	0.437269	0.509404	0.560118	0.654238	0.438554	0.370064	0.361503	0.398484	0.66457	0.803559	0.533836	0.397288	0.491241	0.590185
ENSG00000116985	1.08021	1.19876	1.23108	0.733747	0.866895	0.851844	1.30646	1.09177	1.05945	1.21124	1.16155	1.31776	0.887525	1.01051	1.04159
ENSG00000134716	0	0.0353804	0	0.0136905	0.0710712	0.0857537	0	0	0	0.101699	0.0505048	0.0385422	0.028249	0.0886671	0.0644112
ENSG00000171872	1.09481	0.882096	1.01913	1.64868	1.37743	1.59341	0.801242	0.698296	0.832566	0.73355	0.696902	0.716162	0.943494	1.12617	1.10594
ENSG00000162407	5.69027	4.7186	5.2555	6.01418	5.50681	5.66398	5.63127	4.84327	5.33872	7.41729	7.61386	7.66152	6.57123	6.35018	6.46548
ENSG00000285079	0	0	0	0	0	0	0	0	0	0	0	0	0	0	0
ENSG00000169218	0	0	0	0	0	0	0	0	0	0	0	0.00936772	0	0	0
ENSG00000163877	3.2324	2.60297	2.26256	3.00388	2.69754	2.82567	2.54392	2.19731	2.83011	2.77604	2.66094	2.7905	2.83473	3.01964	2.93873
ENSG00000228929	19.9983	35.0234	34.7794	23.795	43.5592	28.5763	44.2991	46.1217	37.5298	30.7888	19.2501	18.1952	17.166	17.7669	19.9912
ENSG00000224570	0	0	0	0	0	0.0177341	0	0	0	0	0	0	0	0	0
ENSG00000224980	0	0	0	0	0.0975957	0	0	0	0	0	0	0	0	0	0
ENSG00000185031	0.0960647	0.177679	0.112551	0	0	0.0215326	0.201266	0.243422	0.100621	0	0	0.0193557	0	0	0
ENSG00000278967	0.0260538	0	0	0.022376	0	0.0175196	0	0	0	0.027703	0	0.0157485	0.0461706	0	0
ENSG00000157184	2.35339	2.21548	2.20141	1.99294	1.9142	1.83205	2.03227	2.19161	2.22392	1.82807	1.77599	1.74054	1.62741	1.87252	1.50895
ENSG00000272491	0.0849317	0.062835	0.0663381	0.0729425	0.0757329	0.0190372	0.0296568	0	0.0593068	0	0	0.0171126	0.0250849	0.0787357	0.0285983
ENSG00000198815	6.9411	5.48351	6.09519	6.36262	5.552	5.67029	6.05451	4.90426	5.26919	7.36584	6.75707	7.10762	6.36337	7.01449	7.02554
ENSG00000134744	3.80622	2.98694	3.49966	2.96991	2.40265	2.76012	3.21797	2.90509	3.38307	2.92725	2.63552	2.79763	2.77891	2.68505	2.78984
ENSG00000226883	0.123577	0	0	0	0	0	0	0	0	0	0	0	0.109497	0.057281	0.0624167
ENSG00000162437	2.29542	1.62891	1.90267	1.20698	1.0234	1.22328	1.77481	1.46153	2.10989	1.8845	1.77278	1.82167	1.9232	1.85292	1.89286
ENSG00000233910	0	0	0	0	0	0	0	0	0	0	0	0	0	0	0
ENSG00000287703	0	0	0	0	0	0	0	0	0	0	0	0	0	0	0
ENSG00000283039	0	0	0	0	0	0	0	0	0	0	0.0316874	0.00906821	0.0132929	0	0.0151547
ENSG00000229032	0	0	0	0	0	0	0	0	0	0	0	0	0	0	0
ENSG00000229294	0	0	0	0	0	0	0	0	0	0	0	0	0	0	0
ENSG00000184292	75.9833	82.0681	91.5247	28.469	29.5348	29.2067	91.9261	107.015	97.0703	17.3879	17.5451	18.6832	23.3725	20.4706	20.8329
ENSG00000187140	0.0739921	0.10264	0.0650176	0.0317735	0.032989	0.0248776	0.0968883	0.123041	0.232505	0.0786756	0.0781424	0.0335439	0.131123	0.12004	0.149488
ENSG00000226754	0.463908	0.433533	0.400489	0.230665	0.087087	0.131348	0.588278	0.556822	0.690507	0.207694	0.206286	0.132828	0.15144	0.203715	0.0986576
ENSG00000228431	0	0	0	0	0	0	0.128615	0	0	0	0	0	0	0	0
ENSG00000279324	0	0	0	0	0	0	0	0	0	0	0	0	0	0	0
ENSG00000232993	0	0	0	0	0	0	0	0	0	0	0	0	0	0	0
ENSG00000234088	0	0	0	0	0	0	0	0	0	0	0	0	0	0	0
ENSG00000186409	0.0958894	0.0521631	0.0947225	0.0403693	0.0285012	0.0214933	0.0768141	0.0643175	0.0886213	0.0219911	0.0238278	0.0306854	0.0199915	0.0226593	0.032288
ENSG00000236973	0	0	0	0	0	0	0	0	0	0	0	0	0	0	0.0478736
ENSG00000162595	0.717008	0.616022	0.623268	1.31104	1.29932	1.41533	0.533042	0.351649	0.218037	1.62316	2.00299	1.99924	1.66001	1.69391	1.77569
ENSG00000227947	0	0	0	0	0	0	0	0	0	0	0	0	0	0	0
ENSG00000277397	0	0	0	0	0	0	0	0	0	0	0	0	0	0	0
ENSG00000271200	0.332964	0.369505	0.130035	0.190641	0.197934	0.0746328	0.232532	0.316391	0.116252	0	0.117214	0.0670878	0.0983422	0	0
ENSG00000235446	0	0	0.0545969	0	0	0	0	0.0442802	0.04881	0	0	0	0	0	0
ENSG00000261196	0	0	0	0	0	0	0	0	0	0	0	0	0	0	0
ENSG00000224209	0.025753	0.00714481	0.0150863	0.0165882	0	0.012988	0	0.0183533	0.0269745	0	0	0.011675	0.0228187	0.0179057	0.019511
ENSG00000171357	0.179418	0.0853319	0.0900892	0.15409	0.0457101	0	0	0.0243553	0.0805404	0.054507	0	0.0464789	0.0454215	0.095045	0.0517832
ENSG00000237853	0	0	0	0	0	0	0	0	0	0	0	0	0	0	0
ENSG00000162385	21.1056	21.6082	22.9759	24.6959	30.6633	28.6183	19.9602	22.5661	23.1264	32.4607	29.0827	30.1807	32.9652	29.4616	30.2064
ENSG00000231413	0	0	0	0	0	0	0	0	0	0	0	0	0	0	0
ENSG00000234264	0.0760095	0.0421756	0	0.163199	0.338885	0.332227	0.039812	0.0361131	0.0796147	0.202052	0.160546	0.137834	0.303071	0.211393	0.191955
ENSG00000242391	0.374147	0	0.146118	0.214221	0.111208	0	0	0.237016	0.130631	0	0.526845	0.226156	0.110506	0.231234	0.37795
ENSG00000086015	15.2898	17.1178	16.9771	14.2219	15.3583	14.0328	19.2313	18.7963	17.0802	15.8138	15.7998	14.7994	16.0583	16.0054	16.1934
ENSG00000223883	0.015407	0.0341957	0.0451276	0.00661604	0.0137383	0.036261	0.0161397	0.0146401	0.0484133	0.00819111	0.0081356	0.0093129	0.0273031	0	0.0155636
ENSG00000284808	0	0	0	0	0	0	0	0	0	0	0	0	0	0	0
ENSG00000184588	0.652767	0.577167	0.615563	0.282589	0.279202	0.278356	0.583738	0.474032	0.594788	0.609441	0.594101	0.603084	0.804105	0.678944	0.820231
ENSG00000242267	0	0	0.0276244	0	0.0210244	0	0.0493986	0	0	0	0	0.014252	0.0417832	0	0
ENSG00000237227	0	0	0	0	0	0	0	0	0	0	0	0	0	0	0
ENSG00000117472	3.01948	3.35086	3.65481	2.45585	2.60329	2.55484	3.72865	4.23728	4.58696	1.74351	1.87952	1.46254	1.32886	1.09373	1.15139
ENSG00000275350	0	0	0	0	0	0	0	0	0	0	0	0	0	0	0
ENSG00000116652	0.159973	0.0147941	0.0156188	0.057246	0.0356616	0.0448217	0.05586	0.0380025	0.0558535	0.0566995	0.0281577	0.0241742	0.0236243	0.0617926	0.0673328
ENSG00000203605	0	0	0	0	0	0	0	0	0	0	0	0	0	0	0
ENSG00000123080	10.1913	9.236	10.91	10.0474	9.43755	10.7389	11.8439	12.534	15.9216	17.4651	16.0201	16.8196	17.0445	17.4399	16.9414
ENSG00000177452	0	0	0	0	0.0723612	0	0	0	0	0	0.0857024	0	0.0719043	0.0752304	0
ENSG00000285778	0	0	0	0	0	0	0	0	0	0	0	0	0	0	0
ENSG00000077549	8.07901	7.42041	8.343	7.6015	8.04722	8.1665	6.82256	6.93396	8.25943	8.3344	8.17569	8.10305	8.79253	8.43762	8.44445
ENSG00000233407	0	0	0	0	0	0	0	0	0	0	0	0	0	0	0
ENSG00000225675	0.668669	0.278269	0.489639	0.430708	0.521715	0.393435	0.175117	0.397116	0.612837	0.62212	0.706176	0.35366	0.518421	0.542402	0.759899
ENSG00000237622	0	0	0	0.120777	0	0	0	0	0	0.14953	0.297034	0	0	0.260739	0
ENSG00000162598	0	0	0	0	0	0	0	0	0	0	0	0	0	0	0
ENSG00000280317	0	0	0	0	0	0	0	0	0	0	0	0	0	0	0
ENSG00000162415	0.318797	0.293381	0.337067	0.166948	0.180268	0.135943	0.390974	0.332483	0.171031	1.14921	1.32208	1.2737	0.86809	0.951495	0.989676
ENSG00000229133	0	0	0	0.0699345	0.0726099	0.109513	0	0	0.0852917	0.0865837	0.085997	0.147662	0.360757	0	0.0822571
ENSG00000185483	4.38657	3.62359	3.6934	3.26463	2.9053	2.92125	2.38624	1.90318	2.34902	6.6664	6.20414	6.36446	5.94264	5.30876	5.99845
ENSG00000162600	4.11716	2.60277	2.95695	2.14566	1.65944	2.42569	2.14979	1.7926	3.3378	2.79201	2.42309	2.86619	3.07204	3.13143	3.36068
ENSG00000116704	3.25231	2.47976	2.76146	2.54346	1.85604	2.68613	2.08426	1.78154	2.25234	3.56395	3.25694	3.81151	3.19365	3.12146	3.06892
ENSG00000225623	0	0	0	0	0	0	0	0	0	0	0	0	0	0	0
ENSG00000261213	0	0	0	0	0	0	0	0	0	0	0	0	0	0	0
ENSG00000227644	0	0	0	0	0	0	0	0	0	0	0	0	0	0	0
ENSG00000157193	2.52285	2.41198	2.47022	5.11981	4.61093	4.61302	1.59781	1.51117	1.29728	2.89775	3.2242	2.83435	2.60903	2.62026	2.71887
ENSG00000116205	0.985384	0.661301	0.730112	0.802799	0.6807	0.806658	0.636482	0.662468	0.811827	0.811701	0.769181	0.805153	0.814443	0.895444	0.861631
ENSG00000198841	0.915652	1.35485	0.975264	1.42981	1.50925	1.90314	1.30799	1.26556	1.54034	1.71119	1.7289	1.47593	1.5243	1.90349	1.79386
ENSG00000116212	12.0232	10.4748	11.2897	12.0187	10.8772	12.8121	10.8972	10.3218	13.3046	12.4116	11.1711	11.9537	12.9819	12.8109	12.2781
ENSG00000234204	0	0	0	0	0	0	0	0	0	0	0	0	0	0	0
ENSG00000116729	21.6819	20.0511	19.6373	25.3485	25.1147	25.4288	17.313	15.5126	16.9325	18.4095	18.6776	18.6565	17.6105	17.4595	17.393
ENSG00000224127	0	0	0	0	0	0	0	0	0	0	0	0	0	0	0
ENSG00000233099	0	0	0	0	0	0	0	0	0	0	0	0	0	0	0
ENSG00000233994	0.233842	0.259505	0.182648	0.133888	0	0.157245	0.0816539	0.0740674	0.244933	0.165762	0.329278	0.141348	0.207198	0.216782	0.236218
ENSG00000237180	0	0	0	0	0	0	0	0	0	0	0	0	0.157274	0	0
ENSG00000223956	0	0.0238733	0.0504085	0.110854	0.0383649	0.0578633	0.0450709	0.0817667	0.0450656	0.114371	0.0681574	0.130034	0.133429	0.0598292	0.0869244
ENSG00000213561	0	0	0	0	0	0	0	0	0	0	0	0	0	0	0
ENSG00000234496	0	0	0	0	0	0	0	0	0	0	0	0	0	0	0
ENSG00000233973	0	0	0	0	0	0	0	0	0	0	0	0	0	0	0
ENSG00000237552	0	0	0	0	0	0	0	0	0	0	0	0	0	0	0
ENSG00000132854	0.0208652	0.00771836	0	0	0	0.00935375	0.0145716	0.0132178	0.0218549	0	0	0.00840813	0	0	0
ENSG00000227556	0	0	0.518925	0	0	0	0	0	0	0	0	0	0	0	0
ENSG00000162616	5.37672	2.7987	3.16472	4.00202	2.35152	3.7963	2.27978	2.00714	3.66063	4.69615	4.27225	5.15358	5.22917	5.94576	5.79346
ENSG00000271355	0	0	0	0	0.0908795	0	0	0	0	0	0	0	0	0	0
ENSG00000162607	5.64685	2.63712	3.55911	7.2588	5.18816	6.95187	2.65615	2.85166	4.1313	10.7843	9.48225	11.6763	11.483	11.0944	11.8663
ENSG00000233602	1.22499	1.01957	1.52492	0.723297	0.819237	0.463351	0.401014	0.800263	0.320774	0.651266	0.808566	0.69418	0.542709	0.21293	0.541382
ENSG00000233271	0	0	0	0	0	0	0	0	0	0	0	0	0	0	0
ENSG00000285954	0	0.0593599	0.0626693	0	0	0	0	0.0508273	0	0	0	0	0	0	0
ENSG00000233333	0	0	0	0	0	0	0	0	0	0	0	0	0	0	0
ENSG00000154027	0	0	0	0.0117161	0	0.00917335	0.0071453	0.00648143	0.00714447	0.00725269	0.00720354	0	0.00604377	0.01897	0
ENSG00000234108	0	0	0	0	0	0	0	0	0	0	0	0	0	0	0
ENSG00000232676	0.0843272	0	0	0	0	0.056705	0.0441687	0	0	0.0448325	0	0	0.0747191	0	0.0425922
ENSG00000225167	0	0	0	0	0	0	0	0	0	0	0	0	0	0	0
ENSG00000132122	1.58026	1.27541	1.25301	1.09672	0.747253	0.815758	1.0618	0.849393	1.26231	0.823172	0.876595	0.921434	1.02541	0.947057	1.02391
ENSG00000213579	0	0	0	0	0	0	0	0	0	0	0	0	0	0	0
ENSG00000137960	0.036418	0	0	0	0	0	0.0127166	0.0115351	0.0127151	0.0129077	0	0.0220132	0	0.0225075	0.0367881
ENSG00000227288	0.113175	0.219791	0.232045	0.121498	0.100917	0.114155	0.118557	0.107541	0.0592714	0.3911	0.328688	0.393355	0.350979	0.419673	0.0285813
ENSG00000237852	0	0	0	0	0.099903	0	0.117365	0	0	0	0	0.0677222	0	0.207728	0.113176
ENSG00000116745	0	0.0605677	0.0426296	0.265617	0.194667	0.256903	0	0	0	1.06393	1.07594	0.989706	0.386876	0.539695	0.404307
ENSG00000132855	0.0281174	0	0	0	0	0.00945364	0	0	0	0	0.0148473	0.00849792	0	0.0130331	0
ENSG00000285407	0	0.0187163	0	0.0289693	0	0	0	0	0	0	0.0178115	0.0305834	0.0149438	0.0312701	0.0170369
ENSG00000272506	0.306744	0	0	0	0	0	0.160665	0	0.0803232	0	0	0	0	0.0710915	0
ENSG00000172380	32.1742	17.7578	21.892	32.527	21.2415	30.0771	17.5628	14.1259	23.2249	41.5211	39.6368	46.047	47.4159	48.7147	49.6606
ENSG00000286429	0.0785936	0	0	0.0337495	0	0.0264247	0	0	0	0.0417842	0	0	0	0.03643	0
ENSG00000272855	0	0	0	0	0	0	0	0	0	0	0	0	0	0	0
ENSG00000270549	0	0	0	0	0	0	0	0	0	0	0	0	0	0	0
ENSG00000237163	0	0	0	0	0	0	0	0	0	0	0	0	0	0	0
ENSG00000234184	0	0	0.0577183	0	0	0	0	0	0	0	0	0	0	0	0
ENSG00000229636	0	0	0	0	0	0	0	0	0	0	0	0	0	0	0
ENSG00000116675	2.35665	2.13153	2.03491	0.924245	0.83206	0.883956	2.16192	1.94811	1.75501	3.29523	3.15062	3.31011	2.7701	3.13818	2.99296
ENSG00000224149	0	0	0	0	0	0	0	0	0	0	0	0.0130034	0	0	0
ENSG00000162433	17.0919	11.3125	13.4233	16.6395	13.261	15.7953	10.2396	8.62271	12.4722	10.593	10.1184	11.1214	11.4705	11.7286	11.6178
ENSG00000213625	12.2529	7.66248	9.03328	9.80048	6.75401	8.97568	8.74035	7.10278	10.7014	10.4401	9.01229	10.5353	10.5201	10.8976	11.2531
ENSG00000085999	0.801874	0.683527	0.721634	2.54512	2.44559	2.24281	0.474786	0.386502	0.438213	4.02837	3.96425	3.87058	4.74703	4.56799	5.09494
ENSG00000227207	0	0	0	0	0	0	0	0	0	0	0	0	0	0	0
ENSG00000227016	0	0	0	0	0	0	0.035923	0	0	0	0	0	0	0	0
ENSG00000236200	0.550677	0.236961	0.408175	0.299208	0.46097	0.377854	0.306091	0.39512	0.388454	0.585533	0.557828	0.720068	0.697047	0.604269	0.760619
ENSG00000233664	0	0	0	0	0	0	0	0	0	0	0	0	0	0	0
ENSG00000237928	0.0228799	0.00846362	0	0.0131001	0.0068006	0.0205138	0	0.00724702	0	0.0162188	0.00805443	0	0	0	0
ENSG00000158966	0.614165	0.584199	0.648398	0.463707	0.409229	0.471987	0.64337	0.557942	0.459496	0.581277	0.498934	0.546657	0.502327	0.56936	0.572683
ENSG00000284882	0.240365	0.266743	0.281615	0.103217	0.142887	0.134692	0.335727	0.304534	0.587453	0.0425965	0.0423079	0.0968605	0.212978	0.0371382	0
ENSG00000213703	0.0867984	0.096324	0	0	0	0.0583667	0	0	0	0	0	0	0	0	0
ENSG00000203965	1.52877	1.00502	1.06105	0.991859	0.807543	1.02242	1.22721	0.939503	1.61869	0.63608	0.622995	0.823637	0.831892	0.700919	0.788941
ENSG00000223479	0	0	0	0	0	0	0	0	0	0	0	0	0	0	0
ENSG00000234953	0	0	0	0	0	0	0	0	0	0.0783697	0	0	0	0	0
ENSG00000233674	0	0.19407	0	0	0	0.117595	0.183194	0	0	0	0.184687	0	0	0	0
ENSG00000153898	0.0275374	0.0763988	0.145185	0.0827755	0.0245549	0.0740691	0	0.0523335	0.0288436	0.380646	0.479854	0.374518	0.280598	0.306342	0.375534
ENSG00000233290	0	0	0	0	0	0	0	0	0	0	0	0	0	0	0
ENSG00000117069	0.00782174	0.0260404	0.0366562	0.0201528	0.0139492	0.00525965	0.0163874	0.0222972	0.0409637	0.133069	0.123907	0.132382	0.291083	0.268292	0.229136
ENSG00000229943	0	0	0	0	0	0	0	0	0	0	0	0	0	0	0
ENSG00000187048	0	0	0.0142738	0	0	0	0.0510494	0.0231532	0.0127609	0.0129542	0	0	0	0	0
ENSG00000286918	0.423378	0.381746	0.341025	0.318161	0.235952	0.195729	0.49895	0.176008	0.277162	0.168816	0.0838362	0.0959681	0.422031	0.245307	0.240571
ENSG00000228734	0	0	0	0	0	0.0370992	0	0	0	0	0	0.0333486	0.0488849	0.0511462	0
ENSG00000125703	2.50952	1.26588	1.40773	2.11608	1.51894	2.32159	0.876286	0.896035	1.9276	2.84626	2.16841	2.88671	2.6144	3.01733	2.61185
ENSG00000228056	0.0967182	0	0	0.16613	0.0862428	0.130074	0	0	0	0.20568	0	0.0584622	0	0	0
ENSG00000285041	0	0	0	0	0	0	0	0	0	0	0	0	0	0.0166671	0
ENSG00000185839	1.85447	2.13421	4.02355	3.48031	2.44979	3.14064	2.0146	1.24004	2.08631	3.43248	3.55429	2.44948	3.10377	3.05632	3.12219
ENSG00000285808	0	0	0	0	0	0	0	0	0	0	0	0	0	0	0
ENSG00000236676	0	0	0	0	0	0	0	0	0	0	0	0	0	0	0
ENSG00000275678	0	0	0	0	0	0	0	0	0	0	0	0	0	0	0
ENSG00000229440	0	0	0	0	0	0	0	0	0	0.23222	0	0.132011	0	0	0
ENSG00000234144	0	0	0	0.180097	0	0	0	0	0	0	0	0	0.185806	0	0
ENSG00000226891	0.132599	0.10033	0.141231	0.0103528	0.0214976	0.0202647	0.170473	0.18327	0.16414	0.0256348	0.0190959	0.0109296	0.0213619	0.0167625	0.0243539
ENSG00000213540	0	0	0	0.0825596	0.085718	0	0	0.0913448	0	0.102214	0	0.116213	0	0	0
ENSG00000277670	0	0	0	0	0	0	0	0	0	0	0	0	0	0	0
ENSG00000227466	0	0	0	0	0	0	0	0	0	0	0	0	0	0	0
ENSG00000154007	0	0	0	0	0	0	0	0	0	0	0	0	0	0	0
ENSG00000225242	0	0	0	0	0	0	0	0	0	0	0	0	0	0	0
ENSG00000230498	0.022719	0	0.0266179	0	0	0	0	0	0	0.0966284	0.0719802	0.0961291	0	0.0842465	0.0917998
ENSG00000229554	0	0	0	0	0	0	0	0	0	0	0.111719	0	0	0	0
ENSG00000285851	0.0352881	0.0195804	0.062016	0.0303067	0.0471991	0	0.0184831	0.0502975	0.0369618	0	0.0186337	0.0213302	0.0469011	0.0327137	0.0534702
ENSG00000285782	0	0	0	0	0	0	0	0	0	0	0	0	0	0	0
ENSG00000162618	0.0163477	0	0	0	0	0	0	0	0	0	0	0.00494075	0.00724252	0	0
ENSG00000224493	0	0	0	0	0	0	0	0	0	0	0	0	0	0	0
ENSG00000131233	0.0582926	0	0.0227655	0.0333759	0	0	0.0407098	0.0184637	0.0203525	0	0	0.0117452	0	0.0180133	0.0196284
ENSG00000272371	0	0	0	0	0.0926731	0	0	0	0	0	0	0	0	0	0
ENSG00000287647	0	0	0	0	0	0	0	0	0	0.0244739	0.024308	0.0417384	0.0407889	0	0.0232509
ENSG00000229225	0	0	0	0	0	0	0	0	0	0	0	0	0	0	0
ENSG00000230863	0.0439017	0.0487197	0.0257179	0.0377044	0	0	0	0	0.022992	0.0233403	0.0231821	0	0	0.040699	0
ENSG00000234383	0.962091	0.830414	0.793214	0.642662	1.2074	0.407338	1.19448	0.812626	0.485201	0.606216	0.413949	0.473852	0.252584	0.693703	0.647914
ENSG00000271576	0.710435	0.886951	0.867036	0.838952	0.607093	0.378199	1.27137	1.20951	1.1162	0.598028	0.593975	0.590465	0.577031	0.603723	0.657851
ENSG00000213560	0.0852373	0	0.0998651	0	0.0760053	0.114634	0.0892906	0	0	0.0906326	0.0900184	0.0515224	0	0.158038	0.172207
ENSG00000153936	5.13104	2.29465	3.17777	4.19845	2.54942	3.94812	2.29977	1.94662	3.54283	4.47866	3.82824	4.59439	4.39939	4.5319	4.59009
ENSG00000267734	0	0	0	0.0545602	0	0	0	0	0	0	0	0	0	0	0
ENSG00000287224	0	0	0	0	0	0	0	0	0	0	0	0	0	0	0
ENSG00000225598	0	0	0	0	0	0	0	0	0	0	0	0	0	0	0
ENSG00000227883	0	0	0	0	0	0	0	0	0	0	0	0	0	0	0
ENSG00000174021	10.0414	10.5839	10.0418	11.5106	13.7866	10.5945	10.3428	11.7373	10.2536	13.2234	13.4887	10.6916	11.6521	9.65937	8.19114
ENSG00000084072	4.00471	3.99978	4.35755	4.19313	4.36114	4.31441	4.27994	4.55026	4.52488	4.21743	4.01338	3.95808	3.73716	4.00087	4.01529
ENSG00000286455	0	0	0	0	0	0	0	0	0	0	0	0	0	0	0
ENSG00000225087	0	0	0	0	0.0145922	0.0110042	0	0	0	0	0	0	0	0	0
ENSG00000224986	0.136184	0.100753	0.0531849	0.116959	0	0	0.0951064	0.0431351	0	0	0.0479408	0	0	0.0420829	0.137568
ENSG00000285374	0	0	0	0	0	0	0	0	0.04683	0	0	0.027025	0	0.0414477	0
ENSG00000180488	2.14312	1.158	1.1787	1.47086	0.901257	1.07612	1.12252	0.867045	1.10768	1.59713	1.34416	1.54999	1.55895	1.45321	1.65913
ENSG00000280378	0.108016	0.0599349	0.0316382	0.11596	0.0240792	0.0363171	0.169728	0.102639	0.141424	0.114853	0.0570373	0.114259	0.119636	0.0250339	0.0818352
ENSG00000286863	0	0	0	0	0	0	0	0	0	0	0	0	0	0	0.00745927
ENSG00000016490	0	0	0	0.0245933	0.0510682	0.0385114	0	0	0	0.0608963	0.0604837	0.0173091	0	0	0
ENSG00000233595	0	0	0	0	0	0	0	0	0	0	0	0	0	0	0
ENSG00000188786	2.83557	2.67935	2.47426	3.12308	2.37505	2.77236	2.06934	1.72488	1.70872	3.2232	3.15124	3.44948	2.33377	2.57921	2.81645
ENSG00000117151	0.95686	0.53852	0.664635	0.516551	0.469273	0.698582	0.615737	0.409155	0.780319	0.501446	0.425867	0.615565	0.46631	0.418183	0.566143
ENSG00000162434	18.6376	15.0986	15.8963	12.6589	10.1495	11.8029	15.4483	13.5599	15.6825	14.0474	14.3647	14.7	16.0515	16.4354	16.293
ENSG00000230053	0	0	0	0	0	0	0	0	0	0	0	0	0	0	0
ENSG00000137941	0.916654	0.513612	0.589627	0.775679	0.568955	0.643589	0.569557	0.593495	0.729512	0.425226	0.441327	0.442721	0.545456	0.466547	0.449368
ENSG00000273338	1.13378	0.251641	0.26567	0	0	0.762398	0	0.215469	0.237511	0.482217	0	0.822387	1.0046	0.420426	0.687181
ENSG00000116717	20.7047	19.234	23.3349	14.695	15.4767	16.3894	27.4405	35.1842	32.2078	15.6018	15.8081	16.3694	17.5822	16.6609	15.8667
ENSG00000223720	0.0727986	0	0.0852919	0	0	0.0489527	0	0	0	0	0	0	0	0	0.0735386
ENSG00000224326	0	0	0	0	0	0	0	0	0	0	0	0	0	0	0
ENSG00000235002	0	0	0	0	0	0	0	0	0	0	0	0	0	0	0
ENSG00000286548	0	0	0	0	0	0	0	0	0	0	0.0160289	0.00917421	0	0.00703516	0.0153318
ENSG00000137968	0	0	0	0	0	0	0	0	0	0	0	0.00454778	0.00666648	0	0
ENSG00000066135	4.50699	4.02766	4.19865	4.15342	3.97808	4.02656	4.16586	3.87437	4.03132	3.91741	3.91983	3.84053	4.30128	4.03411	4.38657
ENSG00000230027	0	0	0	0	0	0	0	0	0	0.0384083	0	0	0	0	0
ENSG00000233061	0	0	0	0	0	0	0	0	0.0169941	0	0	0	0	0	0.0163895
ENSG00000272094	0.0539157	0.0598327	0.0631684	0	0	0.108765	0	0	0	0.171985	0	0.162949	0.0477726	0	0.217855
ENSG00000228853	0	0	0	0	0	0	0	0	0	0	0	0	0	0	0
ENSG00000215874	0	0	0	0	0	0	0	0	0	0	0	0	0	0	0
ENSG00000232453	0.114584	0.127159	0.134248	0.196818	0.163478	0.200332	0.0960262	0.174209	0.144023	0.0974694	0.121011	0.110818	0.0812227	0.0637348	0.0694491
ENSG00000260386	0.266621	0.133147	0.234283	0.0228984	0.0118872	0.053786	0.321195	0.266018	0.181524	0.0141749	0.0281577	0.00805808	0	0	0
ENSG00000284895	0	0	0	0	0	0	0	0	0	0	0	0	0	0	0
ENSG00000117174	2.81158	2.5775	2.32734	3.14303	3.13383	3.14932	1.99287	1.80045	2.13668	3.80192	3.48568	3.6345	3.64884	3.24392	3.6814
ENSG00000237413	0.133714	0.105991	0.0671403	0.0820272	0.0510991	0.0899144	0.0400206	0.0907557	0.140056	0	0.0605202	0	0.033851	0.0708336	0.0385922
ENSG00000184313	0.0677921	0.0462966	0.0977553	0.00895728	0.00929995	0.0105199	0.0710159	0.10406	0.0819318	0.0221794	0.0275364	0.0441297	0.0277237	0.0338404	0.0210711
ENSG00000224494	0	0	0	0	0	0	0	0	0	0	0	0	0	0	0
ENSG00000284645	0	0	0	0	0	0	0	0	0	0	0	0	0	0	0
ENSG00000225605	0	0.0250801	0	0	0	0	0	0	0	0	0	0	0	0	0
ENSG00000226476	0.247725	0.152729	0.229324	0.128704	0.141809	0.129562	0.24669	0.185991	0.227441	0.204871	0.164724	0.197804	0.176141	0.13042	0.142113
ENSG00000234807	0.0850164	0.104829	0.0996064	0.14603	0.143194	0.0508164	0.0890592	0.0448804	0.128626	0.0703093	0.079809	0.0742285	0.0836997	0.0437857	0.114507
ENSG00000225446	0.051457	0	0	0	0	0.0173009	0	0	0.0538977	0.0273571	0.0271717	0.0466555	0.0455941	0.0238515	0
ENSG00000288543	0.190712	0	0	0	0	0	0	0	0.0998788	0	0	0.0576388	0	0.0883995	0
ENSG00000234683	0	0	0	0	0	0	0	0	0	0	0	0	0	0	0
ENSG00000122420	0.698874	0.419721	0.356424	0.466052	0.256604	0.403605	0.404813	0.335951	0.456438	0.166107	0.147615	0.168976	0.218557	0.327756	0.348836
ENSG00000284240	0	0.0106766	0.0112718	0	0	0	0	0	0	0	0	0	0.00852459	0	0
ENSG00000267561	0	0	0	0	0	0	0	0	0	0	0	0	0	0	0
ENSG00000236290	0	0	0	0	0	0	0.0706196	0.0640583	0	0	0	0.0407489	0	0.0624958	0.068099
ENSG00000143013	7.76315	7.45091	7.90727	6.07413	6.77422	6.24314	8.62684	8.09115	8.79982	5.3357	5.33648	4.80348	6.41385	6.60518	5.98751
ENSG00000226084	72.4968	89.2658	84.6381	72.9701	91.4469	79.6418	98.2177	85.0353	103.841	86.7101	69.6194	71.5904	61.8154	54.463	58.3109
ENSG00000134748	5.23108	4.33515	4.98213	6.29695	5.11591	6.05366	4.17175	3.62381	5.4085	7.11423	6.29081	6.59425	6.8853	6.91439	6.63088
ENSG00000097096	0.0665928	0.0246337	0.043345	0.00635471	0.00659781	0.0348287	0.0155021	0.00703091	0.0310006	0.35404	0.31257	0.357801	0.249134	0.219501	0.269079
ENSG00000142892	5.47491	3.67216	4.40051	6.6434	4.81295	6.56552	2.89014	2.88296	3.601	7.52129	6.91663	7.77725	7.40993	7.98375	8.24808
ENSG00000242598	0	0	0	0	0	0	0	0	0	0	0	0	0	0	0
ENSG00000219102	0.0891663	0	0.313405	0.153159	0.278281	0.149898	0.14011	0.0847281	0.373582	0.189621	0.0470839	0.269487	0.197517	0.330646	0.405327
ENSG00000184005	0	0.00729242	0.0230969	0.0225745	0.0410167	0.0265127	0.027535	0.00624418	0.00688294	0.153718	0.145737	0.103274	0.110628	0.0670105	0.132761
ENSG00000230953	4.33297	4.20743	2.221	1.16291	0.724439	1.82104	3.40427	1.02933	1.70193	2.30362	2.57401	3.27388	1.91964	0.753164	0.82069
ENSG00000287743	0	0	0	0	0	0	0	0	0	0	0	0.0171331	0	0.0262766	0
ENSG00000229332	0	0	0	0	0	0	0	0	0	0	0	0	0	0	0
ENSG00000227937	0	0	0	0	0	0	0	0	0	0	0	0	0	0	0
ENSG00000229752	0	0	0	0	0	0	0	0	0	0	0	0	0	0	0
ENSG00000237505	0.0512807	0.0189695	0.0367163	0.0244676	0.0127018	0.00957867	0.0358129	0.0351926	0.0447608	0.0181755	0.00601746	0.00688824	0.00252432	0.0158465	0.00863365
ENSG00000285462	0	0	0	0	0	0	0	0	0	0	0	0	0	0	0
ENSG00000233216	0.14718	0.653328	0.344876	0.126403	0.262478	0.296909	0.770894	0.139854	0.616643	0.156496	0.155435	0.177928	0	0.272885	0
ENSG00000197273	0	0	0	0	0	0	0	0	0	0	0	0	0	0	0
ENSG00000226804	0	0	0	0	0	0	0	0	0	0	0	0	0	0	0
ENSG00000285325	0	0	0	0	0	0	0	0	0	0	0	0	0	0	0
ENSG00000058804	4.12671	2.70764	3.25857	7.02798	5.58678	7.13659	2.00896	1.87956	2.53457	10.3773	10.5827	11.0884	10.5069	10.4717	11.3091
ENSG00000230728	0.152141	0	0	0	0	0	0.0796879	0	0	0	0	0.0459815	0	0	0
ENSG00000162402	12.3062	8.7181	9.54589	9.24874	7.08944	7.99157	8.68374	6.95178	8.36068	9.4639	9.42891	9.52818	8.76655	8.17812	8.55696
ENSG00000232846	0	0	0	0	0	0	0	0	0	0	0	0	0	0	0
ENSG00000219201	18.4731	9.19377	9.46518	14.1418	13.811	17.7853	6.41457	5.37853	9.70158	24.1289	20.2701	20.0619	24.5752	14.8834	22.7153
ENSG00000287661	0	0	0	0	0	0	0	0	0	0	0	0	0.0225643	0	0
ENSG00000230787	0	0	0.0499775	0	0.0380369	0.0286843	0	0	0.0446802	0	0	0.0773532	0	0	0
ENSG00000116641	1.62416	1.22977	1.37195	1.91327	1.43127	1.80147	1.02123	0.781609	1.10887	1.78973	1.68711	1.80925	1.62637	1.7069	1.65413
ENSG00000235927	0.578959	0.688389	0.339158	0.30189	0.221251	0.389315	0.238264	0.275071	0.259894	0.461704	0.349391	0.412449	0.31146	0.402542	0.271534
ENSG00000223920	0	0	0	0	0	0	0	0	0	0	0	0	0	0	0
ENSG00000237453	0.138169	0.153332	0	0.237329	0.246408	0.0929103	0.144739	0.131292	0	0.293829	0.145919	0	0	0	0
ENSG00000281207	0.276453	0.284878	0.242922	0.271346	0.316942	0.232372	0.237885	0.206401	0.206832	0.419931	0.521357	0.435665	0.489908	0.475958	0.418894
ENSG00000172260	0.00358812	0	0.00420389	0	0	0	0	0	0.00375831	0.00763048	0.0265257	0.00216887	0.00635859	0.00332636	0.0108738
ENSG00000285473	0.0661898	0	0	0	0	0	0	0	0.0693293	0	0	0	0	0.0613611	0
ENSG00000237959	0	0	0	0	0	0	0	0	0	0	0	0	0	0	0.148676
ENSG00000231364	0	0	0	0	0	0	0	0	0	0	0	0	0	0	0
ENSG00000234578	0	0	0	0	0	0	0	0	0	0	0	0	0	0	0
ENSG00000185104	4.43848	4.24979	4.65589	5.49953	5.58676	5.96922	4.07082	4.05649	4.9186	7.30276	7.18697	6.9975	7.1702	7.00136	6.55733
ENSG00000117480	6.73299	8.76549	8.78534	3.86997	6.20543	4.44564	10.3337	10.2002	9.16623	4.71729	5.03442	4.35376	4.88675	5.01602	4.85063
ENSG00000227960	0	0	0	0	0	0	0	0	0	0	0	0	0	0	0
ENSG00000137944	9.34458	6.53819	7.53481	7.85865	6.004	8.18473	6.35264	6.13154	10.9406	5.34666	4.33039	5.25707	5.6219	5.24174	5.7335
ENSG00000237568	0	0	0	0	0	0	0	0	0	0	0	0	0	0	0
ENSG00000229505	0	0	0	0	0	0	0	0	0	0	0	0	0	0	0
ENSG00000228187	0	0	0	0	0	0	0	0.0788669	0	0	0	0	0	0	0.0838417
ENSG00000285201	0.322394	0.357775	0	0.276884	0.0958253	0.0722635	0.67545	0.408463	0	0.228534	0.113493	0.129916	0	0	0
ENSG00000182183	0.0529716	0.11757	0.0827496	0	0	0.059367	0.184969	0.151005	0.0739788	0	0.0559429	0.0426922	0.0312907	0.0327381	0.05351
ENSG00000236407	0	0	0	0	0	0	0	0	0	0	0	0	0	0	0
ENSG00000232284	0.56077	0.424993	0.416638	0.399384	0.207331	0.450662	0.401176	0.428886	0.558716	0.450835	0.332224	0.388567	0.290855	0.304309	0.248694
ENSG00000236915	0	0	0	0	0	0	0	0	0	0	0	0.0104626	0	0	0.0349698
ENSG00000271949	0	0	0	0	0	0	0	0	0	0	0	0	0	0	0
ENSG00000227062	0	0	0	0	0	0	0	0	0	0	0	0	0	0	0
ENSG00000067334	4.53243	3.08506	3.45646	5.93908	5.17135	6.45588	2.83953	2.67754	4.42387	7.10498	6.39109	7.05302	7.4958	7.08282	7.29121
ENSG00000235011	0	0	0	0	0	0	0	0	0	0	0	0	0	0	0
ENSG00000284734	0	0	0	0	0	0	0	0.0281105	0.0309861	0	0	0.0178817	0	0	0
ENSG00000215875	0	0	0.0521362	0	0	0	0	0	0	0	0	0	0	0	0
ENSG00000235673	0.0685845	0	0	0	0	0	0	0	0	0	0	0	0	0	0
ENSG00000225938	0.352793	0.261007	0.275558	0.201995	0.209722	0.237232	0.49276	0.893955	0.246351	0.125041	0	0.142166	0.208398	0.109019	0
ENSG00000180869	0.0164327	0	0	0.028226	0	0.01105	0.0172141	0	0	0.0174729	0.0173544	0.0099329	0	0	0.0165997
ENSG00000226938	0	0	0	0	0	0	0	0	0	0	0	0	0	0	0
ENSG00000213559	0	0	0	0	0	0	0	0	0	0	0	0	0	0	0
ENSG00000287587	0	0	0	0	0	0.0268251	0.0417892	0	0	0.0424173	0	0	0	0	0.0402977
ENSG00000122417	3.33544	1.59255	2.09403	3.17458	2.1715	2.82773	1.78119	1.51653	2.3048	2.11314	1.80949	2.17911	2.13852	2.11247	2.13933
ENSG00000142949	26.4788	35.4187	30.4268	43.3351	45.8213	38.7613	32.0805	30.9539	20.3619	45.3676	49.7652	44.8524	46.9471	46.3544	45.9876
ENSG00000116133	57.5887	66.0247	59.6621	127.385	136.645	126.904	34.2502	33.5755	31.8097	58.9552	62.4541	59.9391	57.7983	57.0287	58.2819
ENSG00000235105	0.603238	0.71128	1.50187	1.13331	0.60514	1.09016	1.6983	1.39721	1.73759	1.72382	1.63251	0.934372	1.43649	1.50293	1.0664
ENSG00000285210	0.32854	0.145838	0.211707	0.141081	0.205069	0.187785	0.275331	0.23414	0.275298	0.104801	0.0173484	0.0595767	0.130998	0.0761431	0.149346
ENSG00000232882	8.16576	7.70685	5.18591	10.2246	8.98258	7.64632	6.23567	5.72884	4.47637	10.4678	11.2835	7.7959	10.2106	7.57004	7.09239
ENSG00000224466	0	0	0	0	0	0	0	0	0	0	0	0	0	0	0
ENSG00000171502	0.00495317	0.0164903	0.0116064	0	0	0.00666142	0	0.0141199	0.0051881	0	0	0.00299399	0.00438881	0.00459182	0
ENSG00000162399	0.00971046	0.0215523	0.00568846	0.0125095	0.00432937	0.00326485	0.00508612	0.00922713	0.0152566	0	0	0.00293479	0.00860406	0.0135031	0
ENSG00000231349	0	0	0	0	0	0	0	0	0	0	0	0	0	0	0
ENSG00000116157	0.140047	0.248666	0.295346	0.168388	0.17483	0.169512	0.234731	0.159691	0.264041	0.0297823	0.059161	0.0338611	0.0496361	0.0519321	0
ENSG00000143036	0.693782	0.678263	0.425776	0.879581	0.765934	0.710898	0.657557	0.61216	0.743991	1.29975	1.16883	1.26807	1.03919	1.11789	0.917758
ENSG00000232672	0	0	0	0	0	0	0	0	0	0	0	0	0	0	0
ENSG00000230817	0	0	0	0	0	0	0	0	0	0	0	0.0265861	0	0	0
ENSG00000235613	0.0279929	0.0931948	0.131187	0.120206	0.024961	0	0.058648	0.0797986	0	0.0892942	0.0886891	0.0507616	0.0744102	0.0259507	0.141387
ENSG00000237478	0	0	0	0	0	0	0	0	0	0	0	0	0	0	0
ENSG00000065243	7.94332	3.96525	4.93502	6.59185	4.05617	5.67409	3.75743	2.88598	4.49111	7.7374	6.84317	7.96635	7.45228	7.28102	7.67699
ENSG00000226759	0	0	0	0	0	0	0	0	0	0	0	0	0	0	0
ENSG00000226960	0	0	0	0	0	0	0	0	0	0	0	0	0	0	0
ENSG00000233877	0	0	0	0	0	0	0	0	0	0	0	0	0	0	0
ENSG00000284637	0	0	0	0	0	0	0	0	0	0	0	0	0	0	0
ENSG00000234080	0	0	0.0633124	0	0	0	0	0	0	0	0	0	0	0.0500964	0
ENSG00000237899	0.10062	0.669973	0.707325	0.43208	0.538331	0.473625	0.316214	0.573669	0.316177	0.748921	0.212528	0.425744	0.178311	0.652955	0.609855
ENSG00000238081	0	0	0	0	0.0638353	0	0	0	0	0	0.0756046	0	0	0	0
ENSG00000234784	0	0	0	0	0	0	0	0	0	0	0	0	0	0	0
ENSG00000225492	0.100748	0.0894437	0.0472151	0.0346105	0.0359345	0.0135494	0.0633234	0.11488	0.0844214	0.0428501	0.0425597	0.0243593	0	0.0186797	0
ENSG00000223905	0	0	0	0	0	0	0	0	0	0	0	0	0	0	0
ENSG00000227290	0	0	0	0	0.0459336	0	0	0	0	0	0	0	0	0.0477549	0
ENSG00000229486	0	0	0	0	0	0	0	0	0	0	0	0	0	0	0
ENSG00000223683	0	0	0	0	0	0	0	0	0	0	0	0	0	0	0
ENSG00000282898	0	0	0	0	0	0	0	0	0	0	0	0	0	0	0
ENSG00000117500	5.90662	2.1012	2.98995	6.02729	3.41338	5.33501	1.88104	1.58405	3.8856	5.87566	5.01535	6.56216	5.92658	6.30566	6.59035
ENSG00000285409	0	0	0	0	0	0	0	0	0	0	0	0	0	0	0
ENSG00000016602	0.0137487	0.0152576	0.0161082	0.0118079	0	0	0	0	0	0	0.0145199	0	0	0	0
ENSG00000171790	0.307882	0.170835	0.334954	0.245533	0.274536	0.192244	0.115187	0.219418	0.161243	0.397522	0.452891	0.292447	0.399461	0.397552	0.299904
ENSG00000231090	0.0553644	0.0204801	0	0	0	0.0372292	0.0193324	0.0526086	0.0579904	0	0	0	0.0163521	0	0.0186424
ENSG00000117528	6.46957	4.64439	4.83804	5.60415	4.36115	5.64511	4.00148	3.93561	4.94776	4.74623	4.25639	4.96963	7.24645	7.18564	7.56722
ENSG00000271723	0	0.0074179	0	0	0	0.00898962	0.0070022	0.0190549	0	0	0	0.00404041	0.00592273	0.00619669	0
ENSG00000066185	1.62971	1.92913	1.7821	0.373241	0.368143	0.686752	2.45838	2.33321	2.84501	0.231049	0.321276	0.315229	0.519848	0.302163	0.812161
ENSG00000172339	0.565301	0.523693	0.610481	0.755693	0.767069	0.747041	0.489195	0.537164	0.576668	0.7213	0.664498	0.695289	0.753515	0.856726	0.799466
ENSG00000036549	6.01869	4.16283	4.7894	4.88893	4.11893	4.31962	4.19959	3.40447	4.81078	5.2193	4.91723	4.9101	5.77112	5.4967	5.49526
ENSG00000287724	0.17109	0.0632887	0.0668171	0	0	0	0	0	0	0.0606398	0	0	0.050532	0.0528695	0
ENSG00000229567	0.280426	0.622401	0	0.722519	0	0.377139	0.293761	0.532935	0	0.596352	0.59231	0	0.496948	0.519935	0.849827
ENSG00000058799	9.42717	8.91186	10.6905	9.55575	10.0043	10.7219	9.29026	7.74143	10.7764	8.11811	8.94808	8.99072	9.32242	10.0342	9.73461
ENSG00000233235	0	0	0	0	0	0	0	0	0	0	0	0	0	0	0
ENSG00000225191	0.0382193	0	0	0	0	0	0	0	0	0	0	0	0	0	0
ENSG00000287870	0	0	0	0	0	0	0	0	0	0	0	0.0236552	0	0	0.0395323
ENSG00000235563	0.0253297	0.0843286	0	0	0	0.0170327	0.0796027	0.0481379	0	0.0538661	0.133753	0.0459324	0.0673311	0.0469637	0.0511744
ENSG00000232048	0	0	0	0	0	0	0	0	0	0	0	0	0	0	0
ENSG00000232857	0	0	0	0	0	0	0	0	0	0	0	0	0	0	0.0573337
ENSG00000284846	0	0	0	0	0	0	0	0	0	0	0	0	0	0	0
ENSG00000273637	0	0	0	0	0	0	0	0	0	0	0	0	0	0	0
ENSG00000272145	0.730403	0.529982	0.329135	0.627297	0.275547	0.680057	0.382568	0.32033	0.411948	0.597412	0.771373	0.730171	0.448049	0.703161	0.624315
ENSG00000235251	0.0505783	0	0	0.0434385	0	0	0	0	0	0.0537798	0	0	0.0448155	0.093777	0
ENSG00000203985	0.378976	0.243486	0.51412	0	0.0355715	0.0804753	1.19099	1.11824	0.87747	0	0.0421298	0.0120566	0.0176735	0	0
ENSG00000228838	0.210631	0.155831	0	0.301496	0.0626059	0.0944244	0.073549	0.133431	0	0.149309	0.0741485	0.169757	0.0622106	0.195265	0.212772
ENSG00000283761	0.0411031	0.00912279	0	0.0282407	0.0146605	0.00552788	0.00861155	0.0156229	0.00861054	0.0262229	0.034727	0.00993807	0	0.0152418	0.00830418
ENSG00000284716	0.0908761	0.0504247	0.0532359	0	0	0.0611088	0.0475988	0	0	0	0.0959736	0.109862	0.0402609	0.0842465	0.0458999
ENSG00000189433	0.0984596	0.0364217	0.0384522	0.0563738	0.0585304	0.0220694	0.137522	0.0623726	0.0343766	0.0697946	0.0346608	0.0991914	0.0290804	0.0304256	0
ENSG00000230759	0	0	0	0	0	0	0	0	0	0	0	0	0	0	0
ENSG00000231866	0	0	0	0	0	0	0	0.257331	0	0	0	0	0	0	0
ENSG00000179178	1.10832	1.45135	1.45435	0.209411	0.217422	0.268301	2.94901	3.24372	2.80936	0.117848	0.210689	0.200981	0.176768	0.164395	0.179134
ENSG00000229687	0	0	0	0	0	0	0	0	0	0	0	0	0	0	0
ENSG00000142700	0	0	0	0	0	0	0.0156709	0	0	0.0318129	0	0	0	0.0138682	0
ENSG00000285525	0	0	0	0.0287849	0	0.0225376	0.03511	0	0.0351059	0	0	0	0.0296974	0	0
ENSG00000236098	0.960647	0.888394	0.84413	1.0313	0.499684	1.13046	1.67722	0.532485	0.335404	1.02145	1.77543	1.16134	1.77332	1.33585	1.53648
ENSG00000233514	0	0.146091	0.154236	1.01755	0.821702	0.61966	0	0	0	0.419931	0.417085	0.477441	0.23329	0.244081	0.930876
ENSG00000127124	0.926775	0.816314	0.801079	1.0492	0.941977	0.926085	0.54992	0.501906	0.495549	0.975101	0.889782	0.914729	1.0193	1.02138	1.08677
ENSG00000235055	0.0524247	0	0	0	0	0	0	0.0498153	0	0	0	0	0	0	0
ENSG00000266993	0.182377	0.0867393	0.030525	0.179008	0.0464639	0.157677	0.0545856	0.024757	0.136448	0.027703	0.0825457	0.220479	0.138512	0.144919	0.0526373
ENSG00000153923	0	0	0	0.0118423	0	0	0	0	0	0.0439846	0.0291244	0.0500084	0.0122177	0.0383485	0.0557156
ENSG00000097033	12.1768	8.7744	10.1109	10.7123	8.91117	10.8605	8.43419	7.87308	11.0663	8.92712	8.77206	9.66678	9.19055	9.30281	9.26721
ENSG00000223675	0	0	0	0	0	0	0	0	0	0	0	0.0131951	0	0	0
ENSG00000182330	0	0	0	0	0	0	0	0	0	0	0	0	0	0	0
ENSG00000162604	2.6978	1.72576	1.63072	1.91851	1.53223	1.75633	1.77306	1.83692	2.01583	1.90019	1.85102	2.1033	1.91081	1.75228	1.2845
ENSG00000229316	0	0	0	0	0	0	0	0	0	0	0	0	0	0.0672811	0
ENSG00000116171	7.56272	4.56914	5.92724	6.58391	4.77225	6.46014	4.65596	4.29977	6.82674	6.37452	5.60359	6.14374	6.2024	6.62239	6.75208
ENSG00000287406	0	0	0	0	0	0	0	0	0	0	0	0	0	0	0
ENSG00000134709	0.0214962	0.00795176	0.0251852	0.0307695	0.0127786	0.0144549	0.0300245	0.0136175	0.0375263	0.0914273	0.0832405	0.168916	0.0698387	0.0664266	0.065144
ENSG00000225767	0.0942185	0	0	0	0	0.0633563	0	0	0	0.200365	0	0.227805	0.166967	0.087345	0.285528
ENSG00000234099	0	0	0	0	0	0	0	0	0	0	0	0.0270761	0	0	0.0452492
ENSG00000137936	4.76727	5.19164	5.04773	9.18866	8.81947	8.78345	4.2334	4.43886	4.44096	6.69316	6.27888	6.14415	5.07984	5.14337	5.16169
ENSG00000235308	0.39909	0	0.116895	0.0856882	0.177932	0.134182	0.104517	0.0948063	0.313514	0.424351	0	0.241234	0.0884045	0.277481	0.100787
ENSG00000232752	0	0	0	0	0	0	0	0	0	0	0	0	0	0	0
ENSG00000235829	0	0	0	0	0	0	0	0	0	0	0	0	0	0	0
ENSG00000143032	0	0	0	0	0	0	0	0	0	0	0	0	0	0	0
ENSG00000228971	0.00684854	0.00760013	0	0.0117636	0.0122136	0.00460523	0.00717422	0	0.0143468	0	0	0	0	0	0
ENSG00000226745	0	0	0	0	0	0	0	0	0	0	0	0.0418197	0	0	0
ENSG00000178028	8.31199	8.58545	8.61783	5.48847	6.36262	5.59501	10.3299	10.6651	10.6656	5.14807	5.35454	5.2238	5.62495	5.69682	5.5321
ENSG00000280040	0	0	0	0	0	0.0474229	0	0.0670134	0	0	0.0744795	0	0.0624883	0	0
ENSG00000168710	31.193	28.5161	29.8633	28.0023	23.8446	25.5009	28.1801	24.7927	24.5685	27.733	27.1375	27.8272	26.0043	24.4236	25.7196
ENSG00000117519	54.6293	48.8889	49.3001	77.0016	71.6413	78.2678	36.8194	33.6089	40.8819	54.3028	56.039	56.3048	59.4197	60.2581	59.8979
ENSG00000270507	0	0	0	0	0	0	0	0	0	0	0	0	0	0	0
ENSG00000238037	0	0	0	0	0	0	0	0	0.181167	0	0	0	0	0	0
ENSG00000215869	0	0.0167174	0	0.0258753	0	0	0	0	0	0.0160177	0	0.00910568	0	0	0
ENSG00000134215	7.43377	4.72228	5.96594	5.25348	3.85802	4.79812	5.46332	4.64137	7.28358	4.13838	3.61025	4.34442	3.61525	3.81255	3.7088
ENSG00000227935	0	0	0	0	0	0	0	0	0	0	0	0	0	0	0
ENSG00000229887	0.0327518	0	0	0	0	0.0220236	0.0686186	0	0.0686106	0.034825	0	0	0.0290201	0	0.0661695
ENSG00000228502	0.545911	1.21164	0.759521	0.556757	1.46035	0.780072	1.42968	1.19958	1.10787	0.725583	0.648599	0.536219	0.695334	0.727498	0.516994
ENSG00000236268	0	0	0	0	0	0	0	0	0	0	0	0	0.0088479	0	0
ENSG00000225568	0.11475	0.0636718	0.0672216	0.443483	0.358127	0.347232	0.0601036	0.327116	0.18029	0.183021	0.484748	0.381491	0.355866	0.212758	0.231833
ENSG00000271277	0	0	0	0	0	0	0	0	0	0	0	0	0	0	0
ENSG00000236888	0	0	0	0	0	0	0	0	0	0	0	0	0	0	0
ENSG00000279778	0.0153521	0.0681476	0.0179867	0.0131849	0	0	0.0482464	0.0291759	0.0482408	0	0	0	0	0	0
ENSG00000232015	0	0	0	0	0	0	0	0	0	0	0	0	0	0	0
ENSG00000230955	0	0	0	0	0	0	0	0	0	0	0	0	0	0	0
ENSG00000230828	0	0	0	0	0	0	0	0	0	0	0	0	0	0	0
ENSG00000188641	8.04154	7.04336	7.14015	6.24998	5.4283	5.82754	6.21701	5.44993	5.86126	5.81579	5.76936	5.92132	5.74146	5.51415	5.64601
ENSG00000152078	1.43748	0.420174	0.766899	0.705463	0.371947	0.699073	0.564689	0.445147	1.00153	0.975764	0.99626	1.12491	1.77976	1.85614	1.98366
ENSG00000237279	0	0	0	0	0	0	0.125685	0	0	0	0	0	0	0	0
ENSG00000233359	0	0	0	0	0	0	0	0	0	0.029061	0	0	0	0	0
ENSG00000237352	0.0448045	0.0186456	0.0459318	0.0384797	0.0299638	0.0150642	0.0293344	0.0106436	0.029331	0.0119101	0.0236588	0.0473943	0.0496244	0.0207679	0.0452599
ENSG00000215887	0	0	0	0	0	0	0	0	0	0	0	0	0	0	0
ENSG00000237954	0	0	0	0	0	0	0	0	0	0	0	0	0	0	0
ENSG00000185668	0.0159838	0.0177379	0.0187268	0	0.0285052	0.0214963	0.0167439	0	0.0167419	0.033991	0.0168803	0.0193231	0.0424878	0.0296354	0
ENSG00000171492	6.974	5.6365	6.01941	6.88711	6.47123	7.46131	3.98024	3.5269	4.8187	7.86202	7.40644	8.38966	7.78914	7.35261	7.06461
ENSG00000233129	0	0	0	0	0	0	0	0	0	0	0	0	0	0	0
ENSG00000230798	0.666939	1.00136	0.919288	0.37063	0.244878	0.395715	1.64389	1.75211	2.01353	0.41715	0.662917	0.450566	0.660472	0.581915	0.594457
ENSG00000170989	0.544422	0.453127	0.637852	0.140271	0.234637	0.207452	1.0931	0.888072	1.10247	0.472754	0.373724	0.268749	0.257275	0.201882	0.155821
ENSG00000186086	0	0	0	0	0	0	0	0	0	0	0	0	0	0	0
ENSG00000055732	0.228946	0.182614	0.192795	0.0491569	0.0637967	0.0914095	0.149896	0.122372	0.20983	1.45302	1.55651	1.47471	1.54047	1.51224	1.4021
ENSG00000258634	2.23695	1.85872	2.0677	1.30331	1.52357	1.46642	2.10782	1.79448	2.3666	1.39844	1.22276	1.27061	1.39443	1.33388	1.23772
ENSG00000271914	0	0	0	0	0	0	0	0	0	0	0	0	0	0	0
ENSG00000233557	0	0	0	0	0	0	0	0	0	0	0	0	0	0	0
ENSG00000237897	0	0	0	0	0	0	0	0	0	0.0849776	0	0.0483077	0	0	0
ENSG00000116299	0.618559	0.612078	0.519377	0.181507	0.229818	0.211438	0.626374	0.675936	0.588507	0.213756	0.283077	0.277304	0.525244	0.592548	0.551947
ENSG00000137962	6.9785	4.07116	4.62457	6.08867	4.55486	5.78381	3.89706	3.17707	4.54243	7.17334	6.82503	7.59904	8.92876	9.17675	9.18902
ENSG00000230881	0	0	0.419057	0	0	0.48103	0	0	0	0	0	0	0	0	0
ENSG00000227832	0	0	0	0	0	0	0	0	0	0	0	0	0	0	0
ENSG00000198691	0.0665383	0.0676871	0.0389786	0.038097	0.049443	0.0559288	0.0697024	0.0263443	0.0580786	0.170979	0.245947	0.241318	0.265307	0.308421	0.296865
ENSG00000286692	0	0	0	0	0.173905	0.196717	0.204303	0.0926605	0.102139	0	0.102984	0.0589434	0	0	0
ENSG00000236674	0	0	0	0	0	0	0	0	0	0	0	0	0	0	0
ENSG00000260464	0.0805072	0.119123	0.28297	0.0691425	0.119646	0.108273	0	0.0765	0.0562172	0.114137	0.113364	0.14599	0.142669	0.149268	0.162651
ENSG00000237435	0	0	0	0	0	0	0	0	0	0	0	0	0	0	0
ENSG00000232825	0	0	0	0	0	0	0	0	0	0	0	0	0	0	0
ENSG00000231996	0	0	0	0	0	0.209659	0	0	0	0	0	0	0	0	0
ENSG00000273204	0.110471	0	0	0.189752	0	0.0742849	0	0	0	0.117463	0.116667	0.066775	0	0	0.223187
ENSG00000079739	20.3075	19.0016	21.3683	27.0847	26.5142	26.8891	17.4253	18.1369	21.0394	23.6694	24.2087	24.2691	23.7101	26.1323	24.612
ENSG00000242396	0.0824207	0	0	0	0.0734938	0.166269	0	0	0	0	0	0.04982	0.0730298	0.0764079	0
ENSG00000117154	0	0	0	0	0	0	0	0	0	0	0	0	0	0	0
ENSG00000162377	5.15279	4.43769	4.49769	8.93911	8.60868	8.77375	2.33387	2.70328	3.18326	10.7757	11.0284	10.96	9.58692	9.76559	9.26772
ENSG00000224613	0	0	0.0200162	0	0	0	0	0	0	0.0181657	0	0	0	0.031676	0
ENSG00000176378	0.144929	0.321669	0.169801	0.248941	0	0	0.151821	0.275431	0	0	0.153059	0.0876039	0.128416	0	0
ENSG00000116670	8.56875	12.2938	10.5237	12.9061	16.7561	14.6015	11.814	11.9085	9.63226	14.8264	16.4576	14.4697	15.387	15.2925	15.3674
ENSG00000215871	0	0	0	0	0.0519152	0	0	0	0	0	0	0	0	0	0
ENSG00000287372	0.0109299	0.0121294	0	0	0	0	0.0228992	0.0103858	0.0114483	0.0464868	0.0577147	0.03964	0	0	0
ENSG00000232542	0.118184	0	0	0	0	0	0	0.112302	0	0	0	0	0	0	0
ENSG00000231095	0.047678	0	0	0.0409476	0	0	0	0.0453048	0.0499394	0.0506959	0.0503523	0	0	0	0
ENSG00000116774	9.22303	10.8691	10.4122	14.1396	15.8789	15.2394	10.1192	10.3922	11.8952	10.8072	10.9823	10.6625	10.9409	11.5248	11.0987
ENSG00000224081	0.097143	0.0975369	0.119234	0.107267	0.0618726	0.0777653	0.0823792	0.105495	0.0920601	0.137723	0.170987	0.153788	0.0901734	0.128652	0.116822
ENSG00000235299	0.148564	0.164868	0	0	0.132473	0	0.311257	0	0	0	0.156897	0.0898009	0	0.137726	0
ENSG00000287756	0	0	0	0.0280123	0.0290839	0.0219327	0	0	0	0.0346811	0.0344461	0.0394308	0	0	0
ENSG00000269113	0.321237	0.531242	0.346847	0.481455	0.640287	0.516736	0.428889	0.395026	0.349669	0.334873	0.419081	0.376927	0.312541	0.303641	0.324502
ENSG00000284652	0.107404	0.0297977	0.0629179	0.0230606	0.0478855	0.0180556	0.0281278	0.0510289	0.0281245	0	0.0283571	0	0	0	0.0271239
ENSG00000023909	1.86912	1.35699	1.32007	2.81298	2.07946	2.73106	0.905807	0.672258	1.26249	4.86643	4.53828	5.04191	5.54891	4.87442	4.95853
ENSG00000117133	6.87079	4.86886	5.28579	9.18903	7.58447	11.5783	3.40365	2.79244	6.67644	10.3864	10.7969	11.8964	11.2224	11.588	11.3726
ENSG00000069702	3.52525	2.6367	2.85491	1.53753	1.14307	1.28558	2.87096	2.50971	2.53494	0.951785	1.0387	1.10551	1.03303	1.08594	1.1554
ENSG00000232185	0	0	0.0667368	0	0	0	0	0	0	0	0	0	0	0	0
ENSG00000230489	0.0765621	0	0.0897011	0.0657543	0.0682697	0	0	0.0727512	0	0.0814082	0	0	0	0	0.0773402
ENSG00000230721	0.0853908	0	0.100045	0.293347	0.152285	0.344521	0.0894515	0.162281	0.268323	0.272388	0.0901806	0.0516153	0.0756615	0.158323	0
ENSG00000228399	0	0	0	0	0	0	0	0	0	0	0	0	0	0	0
ENSG00000236776	0	0	0	0	0	0	0	0	0	0	0	0	0.0912872	0	0
ENSG00000285928	0.158413	0	0.0618663	0.0453503	0	0.0355078	0.0829731	0.100352	0.138272	0.0561467	0.0278831	0.0797952	0.0467879	0	0.0533411
ENSG00000224685	0	0	0	0	0	0	0	0	0	0	0	0	0	0	0
ENSG00000287076	0	0	0	0	0	0	0	0	0	0	0	0	0	0	0
ENSG00000237480	0	0	0	0	0	0	0	0	0	0	0	0	0	0	0
ENSG00000117461	5.7534	3.62612	4.47383	5.9647	5.05599	5.94971	3.09404	2.55696	3.87213	3.00429	2.84861	3.0943	2.94064	2.80939	2.95125
ENSG00000271252	0.165129	0.183251	0.193467	0	0.147244	0.111039	0	0	0.172961	0	0.174391	0	0	0	0
ENSG00000230427	0	0	0	0.0371368	0	0	0	0	0	0	0	0	0.038314	0.0400863	0
ENSG00000237003	0.147638	0	0	0	0	0	0.154659	0.280579	0	0	0	0.0892414	0	0	0
ENSG00000235794	0	0	0	0	0	0	0	0	0	0	0	0	0	0	0
ENSG00000286758	0	0	0	0	0	0	0	0	0	0	0	0	0	0	0
ENSG00000235501	0.847293	0.355216	0.72798	1.14813	0.772313	0.797655	0.276137	0.411505	0.76915	0.36037	0.437467	0.443867	0.433769	0.349102	0.437462
ENSG00000237337	0	0	0	0	0	0	0	0	0	0	0	0	0	0	0
ENSG00000233184	0.72519	0.357086	0.376994	0.424837	0.351159	0.381075	0.442725	0.342265	0.357157	0.55151	0.456478	0.493504	0.459582	0.552076	0.606425
ENSG00000233983	0	0	0	0	0	0	0	0	0	0	0	0	0	0	0
ENSG00000198198	2.92041	2.9236	2.77899	2.24869	2.12145	1.87915	2.84642	2.27609	1.84967	2.28879	2.35495	2.14463	2.16223	1.99551	2.22165
ENSG00000225183	0	0	0	0	0	0	0	0	0	0.21173	0	0	0	0	0
ENSG00000230402	0	0	0	0	0	0	0	0	0	0	0	0	0	0	0
ENSG00000116793	3.42385	2.14186	2.88854	4.85357	3.42433	4.65801	2.17416	1.81514	2.68622	2.93776	2.60373	3.0724	2.81705	2.59808	2.71083
ENSG00000286899	0.0262996	0	0.030813	0.0225871	0	0	0	0	0.027547	0	0	0	0	0	0
ENSG00000134201	0	0	0.00915197	0.0134175	0	0.00525271	0.0163658	0	0.00818193	0	0	0.00472169	0	0.0144831	0
ENSG00000238122	0	0	0	0	0	0	0	0	0	0	0	0	0	0	0
ENSG00000260879	0	0	0	0	0	0	0	0	0	0	0	0	0	0	0
ENSG00000116455	6.33657	6.38558	5.41808	11.2025	11.2691	11.0738	4.14175	3.87435	3.69756	12.049	14.1856	12.9736	13.9817	14.7758	14.7811
ENSG00000213366	2.98409	2.2731	2.60692	1.11622	1.01985	1.16412	2.92449	2.8158	3.33255	0.746257	0.911402	0.744758	1.08251	0.925344	1.08183
ENSG00000230864	0	0	0	0	0	0	0	0	0	0	0	0	0	0	0
ENSG00000283354	0	0	0	0	0	0	0	0	0	0	0	0	0	0	0
ENSG00000232918	0	0	0	0	0	0	0	0	0	0	0	0	0	0	0
ENSG00000236360	0	0	0	0	0	0	0	0	0	0.100382	0.0997016	0	0	0	0
ENSG00000183298	15.0254	25.1609	19.8754	14.7544	21.4656	17.8534	30.9156	29.2203	25.0455	18.3243	20.1338	17.0577	18.8487	20.6193	19.6935
ENSG00000234332	0.421886	0.078031	0.164763	0.362331	0.50159	0.283693	0.220974	0.133629	0.147299	0.14953	0	0.297515	0.43612	0.195554	0.213087
ENSG00000117525	2.36467	1.94991	2.03938	6.43107	4.77353	5.96287	0.739695	0.780197	0.808409	12.9209	12.4692	14.0255	17.5185	17.583	18.0978
ENSG00000099260	2.35962	1.32883	1.48543	0.86707	0.617607	0.722304	1.74012	1.73461	2.4285	0.929944	0.973233	1.04666	1.27942	1.35493	1.28667
ENSG00000225079	0	0	0	0	0	0	0	0	0	0	0	0	0	0	0
ENSG00000226483	0	0	0	0	0	0	0	0	0	0	0	0	0	0	0
ENSG00000224238	0	0	0.0539078	0	0	0.01547	0.0240998	0	0.0481939	0	0	0	0	0	0
ENSG00000229537	0	0	0	0	0	0	0	0	0	0	0	0	0	0	0
ENSG00000282608	0	0.0410882	0	0.0158992	0	0	0.0193928	0	0	0	0.0195509	0.01119	0	0.0171619	0
ENSG00000162699	0	0	0	0	0	0	0	0	0	0	0	0	0	0	0
ENSG00000134258	1.70655	1.89383	1.54083	0.242033	0.125646	0.189504	2.80456	3.10932	3.67337	0.299653	0.248019	0.227128	0.180343	0.27577	0.300495
ENSG00000268993	0	0	0	0	0	0	0	0	0	0	0	0	0	0	0
ENSG00000162692	0.023504	0	0.0275376	0.0605583	0.0209583	0.0263417	0.0164145	0	0	0.00833058	0.0579189	0.0236787	0.006942	0	0
ENSG00000203914	0.0604874	0	0.035434	0.0259744	0.0809042	0	0.0316819	0.0862151	0.126713	0.128632	0.0319402	0.0365622	0	0	0.0611022
ENSG00000227070	2.28995	1.76783	1.86639	1.53915	1.68681	1.7407	2.08595	1.51371	2.0857	1.48211	1.57721	1.08327	1.05863	0.553797	0.804598
ENSG00000270457	0	0	0	0	0	0	0	0.133234	0.146863	0.149088	0.296155	0.0847529	0	0.129984	0
ENSG00000163349	5.21684	4.30609	4.20626	5.56603	3.7233	4.13507	3.29415	2.87979	2.89764	5.81146	5.9198	5.76186	4.28276	4.05343	4.53721
ENSG00000203858	0	0	0	0	0	0	0	0	0	0	0	0	0	0	0.0428208
ENSG00000134222	4.91349	5.67377	6.30126	8.16889	9.84315	8.48331	8.15544	8.02865	8.10232	11.7728	11.991	12.0305	15.1201	15.2347	14.0854
ENSG00000231987	0	0	0.0556921	0.0204122	0	0	0.0497949	0.0225843	0.0746837	0	0	0.0143663	0.0210592	0	0.0240088
ENSG00000228057	0.226035	0.12542	0.220688	0.517671	0.235145	0.303989	0.197319	0.214784	0.197296	0.080114	0.238713	0.227714	0.1669	0.209545	0.266387
ENSG00000261593	0	0	0	0	0	0	0	0	0	0	0	0	0	0	0
ENSG00000224445	0	0	0	0	0	0	0	0	0	0	0	0	0	0	0
ENSG00000267272	0.0352776	0.0234895	0.00826634	0.0363572	0.018874	0.0521885	0.00739103	0.00670433	0.0369508	0.0300085	0.0372564	0.0298534	0.0187549	0.065408	0.0213817
ENSG00000229842	0	0	0	0	0	0	0	0	0	0	0	0	0	0	0
ENSG00000270631	0	0	0	0	0	0	0	0	0	0	0	0	0	0	0
ENSG00000237343	0	0	0	0	0	0	0	0	0	0	0.159396	0	0.401199	0	0
ENSG00000229201	0	0	0	0	0	0	0	0	0	0	0	0	0	0	0
ENSG00000181656	0	0	0	0	0	0	0	0	0	0	0	0	0	0	0
ENSG00000122481	1.77074	1.52839	1.58478	1.33068	1.18422	1.02534	1.08205	1.21521	1.72593	1.09831	0.961006	1.23387	1.2857	1.02598	1.51546
ENSG00000198162	6.231	3.48733	4.13551	5.03563	3.10374	4.13723	2.96836	2.37114	3.2299	4.15978	3.66562	4.16051	3.77047	3.46768	3.69439
ENSG00000238198	0.249734	0.14923	0.180057	0.148487	0.0856485	0.103342	0.160991	0.0912708	0.321944	0.122558	0.0811516	0.139342	0.153194	0.0534267	0.213462
ENSG00000233593	0.0726363	0.0989277	0.0580239	0.0510404	0.0500489	0.0555041	0.114136	0.0658836	0.124497	0.0631915	0.0592764	0.0758371	0.0702112	0.0612158	0.080045
ENSG00000196369	2.70717	2.77877	2.18107	2.8542	2.15094	2.41105	3.66677	1.88728	1.91556	2.24428	2.90748	2.95578	2.68331	2.36991	2.84725
ENSG00000171517	0	0	0	0	0	0	0	0	0	0	0.0141545	0	0	0.0124249	0
ENSG00000228852	0.635012	0.296716	0.313258	0.344445	0.178811	0.179793	0.315099	0.254065	0.525103	0.355372	0.423556	0.383839	0.355364	0.433768	0.405136
ENSG00000234367	3.18304	3.79402	3.1768	3.3412	2.10244	1.58548	1.35846	1.0082	0.61741	2.88311	2.73907	2.1378	2.50699	2.1858	2.26268
ENSG00000225206	0.157989	0.093143	0.173534	0.165369	0.140878	0.136118	0.201706	0.140743	0.108598	0.131242	0.192922	0.140263	0.240605	0.192234	0.144633
ENSG00000203864	0	0	0	0.105445	0	0	0	0	0	0	0	0	0	0	0
ENSG00000233482	0.134636	0	0	0	0	0	0	0	0	0	0	0	0	0	0
ENSG00000271644	2.13477	1.42143	2.50113	0.733368	1.14213	0.574202	0	0.811405	0	0.453979	0.901806	0.258076	2.64815	0.791613	0
ENSG00000230250	0	0	0	0	0	0	0	0	0	0	0	0	0	0	0
ENSG00000232622	0	0	0	0	0.171089	0	0	0	0	0	0	0	0	0	0
ENSG00000117543	6.33488	4.10827	5.90771	5.18024	5.15075	5.65473	4.96456	4.32135	7.28718	6.85463	6.43744	6.59737	6.44728	6.67154	6.64105
ENSG00000287374	0	0.0264021	0	0	0	0.0159981	0.0249225	0.0452139	0	0	0	0.0143808	0	0.0220555	0.0240329
ENSG00000232878	0.192259	0.142239	0.150169	0.0550398	0.0285727	0.0861886	0.033567	0.0304483	0.0335631	0.102214	0.0676812	0.135582	0.170353	0.0297056	0.0323689
ENSG00000143079	2.94472	1.83372	2.18454	3.06465	2.24739	2.77998	1.67708	1.72898	2.03381	2.22869	2.20001	2.30462	2.30726	2.18153	2.05238
ENSG00000227963	0.744186	0.946713	0.765569	0.748254	0.728324	0.915403	0.988728	1.20732	0.893554	0.521094	0.709253	0.438858	0.450318	0.639415	0.421713
ENSG00000275064	0.149266	0.207059	0.131161	0.128195	0	0.0501862	0.078182	0.106377	0.156346	0.079357	0.0788193	0.0676689	0.132259	0.0691883	0.150783
ENSG00000134243	5.59232	4.58683	4.95205	2.11826	1.72703	1.86803	5.53189	4.73175	5.85757	1.99866	2.01254	1.8518	3.04578	2.88821	2.96358
ENSG00000225297	0.256172	0	0	0	0	0	0	0	0	0	0	0.154846	0.226984	0	0
ENSG00000227034	0.184404	0	0	0	0	0	0	0	0	0	0	0	0	0.170952	0
ENSG00000232450	0.69694	1.33592	0.668082	1.19711	1.58189	1.57637	1.12831	1.02348	1.39363	0.404212	0.736033	0.421272	0.336835	0.939776	1.40805
ENSG00000283752	0	0	0	0	0	0	0	0	0	0	0	0	0	0	0
ENSG00000223575	0	0	0	0	0	0	0	0	0	0	0	0	0	0	0
ENSG00000230768	0	0	0	0	0	0	0	0.0144337	0	0	0	0	0	0	0
ENSG00000271578	0	0	0	0	0	0	0	0	0	0	0	0	0	0	0
ENSG00000134250	15.8227	18.1001	15.5431	15.517	13.0318	12.0901	15.7207	12.6242	8.90676	15.1731	16.2054	15.0031	14.9006	14.0203	14.8017
ENSG00000234790	0	0	0	0	0	0	0	0	0	0	0	0	0	0	0
ENSG00000162643	0.0120805	0	0	0	0	0.00812343	0	0	0	0.0128452	0.0255163	0.0219066	0.0107041	0.0335977	0.0366099
ENSG00000235527	0.0766859	0.0680814	0.071877	0.0263443	0.0273521	0.0206267	0.0481996	0.0582951	0.0321293	0.032616	0.032395	0.0278121	0.0271794	0.113746	0.0774654
ENSG00000235202	0	0	0	0	0	0	0	0	0	0	0	0	0	0	0
ENSG00000272715	0	0	0	0	0	0	0	0	0	0	0.130679	0	0	0	0.124996
ENSG00000235038	0	0	0	0	0	0	0	0	0	0	0	0	0	0	0
ENSG00000143093	5.51744	5.75772	5.37558	4.74412	4.45952	4.54764	5.18493	4.84424	3.85952	3.89054	4.04818	3.82265	3.79667	4.01417	4.01554
ENSG00000271291	0	0	0	0	0	0	0	0	0	0	0	0	0	0	0
ENSG00000188761	0.0312646	0.0231305	0.030525	0.0268512	0.0139392	0.0315353	0.00545856	0.0198056	0.0163738	0.027703	0.0220122	0.0220479	0.0184682	0.0144919	0.0105275
ENSG00000226415	6.4453	10.3082	9.62433	17.0948	19.7772	17.4213	9.06859	7.32537	6.94957	13.8409	15.6824	13.7121	13.2135	14.8206	16.8515
ENSG00000085491	5.09431	2.8697	3.50849	5.60967	3.70693	5.20239	2.50959	1.7274	3.49087	5.89626	5.39495	6.2225	4.66371	5.0754	5.62298
ENSG00000117598	0	0	0	0	0	0	0	0	0	0	0	0.00609629	0	0	0
ENSG00000221986	0.21554	0.239195	0.157831	0	0.0240244	0.0362345	0.197566	0.230413	0.225764	0	0	0.0162857	0	0.024977	0
ENSG00000173947	0.720059	0.585993	0.703026	0.257672	0.321035	0.355078	0.905161	0.957906	1.58385	0.114846	0.101393	0.108812	0.0744353	0.0667529	0.133353
ENSG00000241361	0	0	0	0	0	0	0	0	0	0	0.0265942	0	0	0	0
ENSG00000230434	0	0	0	0	0	0	0	0	0	0	0	0	0	0	0
ENSG00000226067	0.364553	0.182052	0.234913	0.500946	0.406336	0.551565	0.152756	0.242485	0.362752	0.775257	0.847004	0.947537	0.920597	0.895589	0.736517
ENSG00000230718	0	0	0	0	0	0	0	0	0	0	0	0	0	0	0
ENSG00000134198	0.0555428	0.0924575	0.113881	0.0477022	0	0.0280119	0	0.0395836	0.043633	0.19194	0.175975	0.0839334	0.246072	0.154472	0.168322
ENSG00000235595	0	0	0	0	0	0.0320929	0	0	0	0	0	0	0	0	0
ENSG00000226053	0.106308	0.0235948	0.0249103	0.0182602	0.0568761	0.0428913	0	0.0606097	0.0668099	0.0226073	0.0449082	0.0257034	0.037678	0.0394209	0.0644329
ENSG00000226128	0	0	0	0	0	0	0	0	0	0	0	0	0	0	0
ENSG00000215784	1.19311	0.998462	0.779138	2.58691	1.36038	2.10438	0.553211	0.42747	0.758015	5.76083	5.53589	5.19018	6.13505	5.94739	6.02619
ENSG00000155363	15.8507	15.5056	17.1548	12.0811	11.3876	10.8643	18.8621	18.6179	18.6082	13.494	15.1865	13.6829	13.8899	13.9924	14.1436
ENSG00000198799	1.74104	1.38369	1.39848	1.50506	1.29146	1.24232	1.20659	1.23175	1.25821	1.43491	1.44928	1.35569	1.4012	1.34619	1.38241
ENSG00000279513	0.031764	0.0352499	0	0	0	0	0	0	0	0	0	0.0384001	0.0281449	0	0
ENSG00000231365	1.33469	0.898789	1.07961	1.03982	0.862202	0.958631	0.805133	0.828491	0.913243	1.25661	1.187	1.27384	1.27415	1.27946	1.16459
ENSG00000143106	10.1412	11.3092	10.8261	15.4673	16.7444	15.5617	10.13	9.13383	10.7694	14.36	14.3499	14.3882	15.3058	15.125	14.9949
ENSG00000117620	1.07337	0.409553	0.581589	0.819172	0.477398	0.761971	0.468277	0.343273	0.686	0.801404	0.730099	0.890735	0.720786	0.804724	1.02127
ENSG00000280186	0.0203311	0.0451248	0.0476405	0	0.0181291	0.0136715	0.021298	0.0579575	0	0.0216181	0.0214716	0.0368681	0.0180146	0.0376959	0.0205378
ENSG00000280099	0.0276016	0	0	0	0	0	0.0289141	0	0.0289107	0.146743	0.0874494	0.0667361	0.0733701	0.0767639	0.0278821
ENSG00000277199	0	0	0	0	0	0	0	0	0	0	0	0	0	0	0
ENSG00000234222	0.204275	0.0647696	0.0683806	0.0751882	0.130108	0.137363	0.12228	0	0.122265	0.108603	0.123276	0.132296	0.155143	0.16232	0.0884365
ENSG00000223906	0	0	0	0	0	0	0	0	0	0	0	0	0	0	0
ENSG00000162688	4.26452	2.50166	2.6139	3.48788	2.13445	2.90279	2.16062	1.58446	2.12385	3.5769	3.20292	3.81391	3.14542	2.98391	3.34534
ENSG00000197106	0.00714164	0.0158508	0.00836724	0	0	0.00480232	0.0523687	0.0339308	0.00748037	0	0	0.0129505	0.00632793	0	0.00721423
ENSG00000259946	0.1571	0.0871706	0.122707	0.0674617	0.0700425	0.0352135	0.137142	0.0746403	0.137126	0.0556814	0.0553041	0.0158268	0.116	0.0485465	0.0264495
ENSG00000271601	16.7314	12.9143	14.7612	15.7056	13.1722	14.3251	12.6384	11.3288	14.7016	13.9395	12.6536	13.2286	14.6147	14.388	14.5744
ENSG00000236137	0.146121	0	0.0855987	0.125494	0.0434316	0.0982576	0.15307	0.0694239	0.0510172	0.15537	0.128598	0.235531	0.17263	0.0903074	0.172207
ENSG00000203859	0	0.0692924	0.0731555	0.0178752	0	0.0139957	0.0218031	0.0197773	0	0.0442615	0	0.062904	0.0368837	0.0192949	0
ENSG00000228086	0	0	0	0	0	0	0	0	0	0	0	0	0	0	0
ENSG00000213421	0	0	0	0	0	0	0	0	0	0	0	0	0	0	0
ENSG00000134242	1.22247	0.631536	0.827257	1.46625	1.12766	1.33936	0.728621	0.590827	1.0045	0.414608	0.267113	0.363097	0.438877	0.488487	0.361953
ENSG00000234020	0	0	0	0	0	0	0	0	0	0	0	0	0	0	0
ENSG00000060718	0	0	0	0	0.00464844	0.00350547	0	0	0	0	0	0	0	0	0
ENSG00000236804	0	0	0	0	0	0	0	0	0	0	0	0	0	0	0
ENSG00000231072	0	0	0	0	0	0	0	0	0	0	0	0	0	0	0
ENSG00000273406	0	0	0	0.0855082	0	0	0.104297	0	0	0	0	0	0.0882188	0	0
ENSG00000276216	0.136576	0	0	0	0.243567	0	0	0	0	0	0	0	0	0.126613	0
ENSG00000185946	1.90479	1.0033	1.07541	1.05504	0.787701	1.09058	1.35916	0.918104	1.39515	1.35024	1.37024	1.29737	1.26582	1.29878	1.39431
ENSG00000162627	9.05651	5.77581	7.4678	7.34485	7.13516	8.35635	5.88445	5.92597	9.70221	8.50832	7.60318	9.34094	8.28872	10.0325	7.78207
ENSG00000134262	2.50455	2.12279	1.84229	2.63132	2.42843	2.62162	2.13118	1.74833	1.98661	2.36144	2.2684	2.2733	2.28382	2.53223	2.38263
ENSG00000226715	0	0	0	0	0	0	0	0	0	0	0	0	0	0	0
ENSG00000186141	11.6408	12.4586	12.0521	10.8394	10.7044	10.7156	11.5487	11.5607	11.9284	10.5511	10.2021	10.237	10.789	11.3256	11.3304
ENSG00000031698	41.925	45.187	44.4604	48.9607	54.5776	52.4182	47.6076	46.9635	50.8778	47.9958	49.309	47.7441	47.7089	46.9594	48.5328
ENSG00000162695	2.81045	1.72456	1.97566	2.82547	2.01467	2.56428	1.53555	1.15724	1.73739	2.50787	2.33374	2.71142	2.4414	2.24781	2.52728
ENSG00000233586	0.184764	0.205041	0.216472	0	0	0	0	0.0877836	0.0967637	0	0	0.167523	0.40928	0	0
ENSG00000226419	0.373842	0.307003	0.350398	0.4206	0.373354	0.394676	0.281966	0.277082	0.344585	0.453156	0.375071	0.393191	0.500182	0.412417	0.422958
ENSG00000134184	0	0	0	0	0	0	0	0.0179271	0	0	0	0	0	0	0
ENSG00000273825	0	0	0	0	0.0223356	0	0	0	0	0	0	0	0	0.0232212	0
ENSG00000286620	0	0.0237977	0.0251244	0	0.0191217	0.04326	0	0	0.0224614	0	0	0.0129622	0	0.0596397	0.0216623
ENSG00000265808	10.9265	8.49493	8.93781	8.40695	7.03615	8.06313	8.00788	7.60265	8.61103	6.8906	6.94358	7.20678	7.13574	6.87768	7.21361
ENSG00000162601	3.92072	2.15344	2.55292	2.82105	1.71098	2.31327	2.10847	1.5795	2.2899	2.97778	2.6294	2.98806	2.74718	2.70676	2.93119
ENSG00000261290	0	0	0	0	0	0	0	0	0	0	0	0	0	0	0
ENSG00000271810	0	0	0.0515074	0	0	0.0295624	0	0	0	0	0	0	0	0	0
ENSG00000272031	0.413114	0.272205	0.363007	0.432409	0.391393	0.460097	0.297522	0.392551	0.419186	0.301993	0.190875	0.335549	0.491872	0.490688	0.430354
ENSG00000275129	0	0	0	0	0	0	0	0	0	0	0	0	0	0	0
ENSG00000225923	0.0638705	0	0	0	0	0	0	0	0	0	0	0	0	0	0
ENSG00000174332	0.0152239	0.0168946	0.0178365	0.0130748	0.02715	0.0204743	0.0637913	0.0578644	0	0.032375	0.0321556	0.0184044	0.0809357	0.0846795	0.076893
ENSG00000134247	10.6427	9.65446	10.0215	10.9597	9.63984	9.82374	8.54718	8.00988	8.23249	14.7494	14.2868	14.363	14.6338	14.1325	14.3518
ENSG00000215866	0	0	0	0	0	0	0.0155971	0	0.0155953	0	0.0157242	0	0	0	0
ENSG00000187481	0	0	0	0	0	0	0	0	0	0	0	0	0	0	0
ENSG00000226835	0.0377525	0.0418956	0.0442313	0.0108077	0.0673271	0.0592346	0.0659129	0.0119578	0	0.254233	0.15948	0.228198	0.301059	0.326651	0.279665
ENSG00000116752	21.729	17.7894	19.9873	27.0609	24.2276	28.1845	16.0607	15.2672	21.0266	31.5095	29.3157	31.0689	29.1893	31.3234	28.0408
ENSG00000162664	2.64822	1.64652	1.93034	2.84484	2.1191	2.65085	1.32834	1.11476	1.64894	3.49	2.8742	3.39962	3.38215	3.23072	3.45066
ENSG00000236866	0	0	0.0508937	0	0.0387341	0	0	0	0	0	0.0917511	0	0	0	0
ENSG00000286172	0.672226	0	0.393794	0.865998	0.299709	0.452032	0.352096	0	0	0	0.354966	0	0	0	0
ENSG00000134253	3.04879	2.8536	3.1271	1.46296	1.18031	1.17463	4.15986	3.87647	4.25029	1.58051	1.78751	1.76417	2.01885	2.08206	1.93993
ENSG00000277655	0	0	0	0	0	0	0	0	0.110066	0	0	0	0	0	0
ENSG00000233730	0	0	0	0	0	0	0	0	0	0	0	0	0	0	0
ENSG00000223416	0	0.302258	0	0.116959	0.242868	0.274726	0	0	0	0.434411	0.287645	0.576222	0.603335	0.252497	0.275136
ENSG00000213226	0.0493666	0	0	0.0423978	0	0	0	0	0	0.0524914	0	0	0	0	0
ENSG00000179571	0	0	0	0	0	0	0	0	0	0	0	0	0	0	0
ENSG00000231752	1.28688	0.851374	0.927833	0.885594	0.809136	0.92637	0.62219	0.501673	0.725803	0.657855	0.609837	0.772882	0.65784	0.680622	0.616649
ENSG00000227850	1.57973	1.16873	0.308472	0.904487	0.234772	0.708183	0.551617	0	0.551553	0.279954	0.278057	0.636588	0.699869	1.2204	0.797893
ENSG00000243967	0	0	0	0	0	0	0	0	0	0	0	0	0	0	0
ENSG00000235777	0	0.0539968	0	0	0	0	0	0	0	0.0517369	0.0513863	0	0.0431131	0.0451073	0
ENSG00000260246	0	0	0	0	0	0	0	0	0	0	0	0	0	0	0
ENSG00000173218	4.76277	3.89577	4.20504	4.97693	4.16749	4.53448	3.27677	2.86279	3.42457	4.89153	5.2402	5.19089	5.26469	5.26535	5.37751
ENSG00000168509	0.0979982	0.0435012	0.0229632	0.0168329	0.0174768	0.0131796	0.0410633	0.0372481	0.0615878	0	0	0.0118472	0.0173665	0.0363396	0.0197988
ENSG00000285532	0.0934752	0.0518668	0	0	0	0	0	0.0444112	0.0489544	0	0.0987184	0.028251	0.0414124	0.0866559	0.0472126
ENSG00000278182	0	0	0	0	0	0.11803	0	0	0.183851	0	0	0	0	0	0.17731
ENSG00000226755	0	0	0	0	0	0	0	0	0	0.0991963	0	0	0	0	0
ENSG00000232650	0	0	0	0	0	0	0	0	0	0	0	0	0	0.028753	0
ENSG00000121933	0.0195189	0	0.0686059	0	0	0	0.0204471	0.0370947	0	0	0	0.0235968	0	0.018095	0
ENSG00000183508	6.73914	5.72067	5.79408	5.93899	5.33656	5.50113	5.66349	5.30456	5.32921	2.549	2.4255	2.3053	2.29494	2.37001	2.24381
ENSG00000227712	0.0811228	0.0540153	0	0.0278685	0	0.0218201	0.0169961	0.030834	0.0509823	0.0172515	0.0342692	0.0392283	0	0	0.0491684
ENSG00000174827	27.2121	25.3209	22.725	6.35147	5.33349	6.6692	20.2986	18.794	33.5068	7.4978	6.65991	7.43884	10.1933	8.50346	10.6943
ENSG00000234225	0	0	0	0.0460429	0	0	0	0	0	0	0	0	0	0.0496997	0
ENSG00000277095	0	0	0	0	0	0	0	0	0	0	0	0	0	0	0
ENSG00000236806	0.0596125	0.0661546	0.139686	0	0.106312	0.0400858	0.312236	0	0.12488	0	0.0629563	0.0720666	0.105641	0.0552636	0.120437
ENSG00000272150	0.953535	1.00321	0.856017	1.05291	0.784005	0.791085	1.18049	1.28262	0.933907	0.855882	0.653909	0.9207	0.658356	0.78065	0.925698
ENSG00000234283	0	0	0	0	0	0	0	0.107221	0	0.11998	0	0	0	0	0
ENSG00000237188	0.0343503	0.0127067	0.0134151	0.00983375	0.0102099	0.0076995	0	0	0.0119932	0.0243497	0.0241847	0.00692111	0.0101455	0.0212295	0.0231329
ENSG00000278431	0	0	0	0	0	0	0	0	0	0	0	0	0	0	0
ENSG00000227212	5.93884	8.69958	5.70558	4.89647	4.23649	4.47273	7.34107	4.51459	2.73703	3.66255	4.39037	3.66158	3.26255	2.53257	6.23917
ENSG00000270231	8.30014	6.23774	7.26548	7.06701	7.25229	7.37765	7.304	4.98604	6.84514	6.63605	7.46429	6.42996	6.12165	6.73648	6.55341
ENSG00000232780	0	0	0.0606831	0	0	0	0	0	0	0	0	0	0	0	0
ENSG00000136631	9.05423	6.84651	8.46637	8.16859	7.61514	8.47002	6.92659	6.01842	8.3618	8.77698	8.96636	9.37906	9.4525	9.91622	9.80987
ENSG00000274927	0	0	0	0	0	0	0	0	0	0	0	0	0	0	0
ENSG00000261737	0.789043	0.711455	0.866675	0.550598	0.263844	0.4311	0.568263	0.374884	0.464888	0.524367	0.36457	0.208663	0.480659	0.411458	0.448348
ENSG00000264145	0	0	0	0	0	0	0	0	0	0	0	0	0	0	0
ENSG00000286019	0.085545	0.0949331	0.0501128	0	0.0762797	0.0287619	0	0.0406435	0	0.0454799	0	0.103417	0.0757981	0.0396521	0
ENSG00000258673	0.409257	0.726672	0.479491	0.421781	0.291944	0.385281	1.02892	1.0111	0.428668	0.783291	0.432213	0.544234	0.507677	0.7588	0.578783
ENSG00000238256	0	0	0	0	0	0	0	0	0	0	0	0.200325	0	0	0
ENSG00000265491	7.10514	5.80667	6.38143	4.83241	4.37531	4.92475	5.61593	5.25297	6.56687	5.22645	5.10957	5.49409	5.87411	5.8876	5.85704
ENSG00000198765	0	0	0	0.00951423	0	0.0148987	0	0	0	0	0	0	0	0	0
ENSG00000224335	0	0	0	0	0	0	0	0	0	0	0	0	0	0	0
ENSG00000287190	0.0788114	0.0291535	0.0615577	0.022562	0.0468503	0.0176653	0.0275197	0.0748886	0	0.0558666	0	0.0158794	0.0232772	0.024354	0.053075
ENSG00000277702	0	0.246915	0	0	0.198399	0.299232	0	0.211423	0	0.236581	0	0.134491	0	0	0
ENSG00000143398	20.3597	14.2259	16.375	18.7357	15.9497	18.4606	14.2369	11.2062	15.9068	25.07	25.2242	26.1767	26.8113	26.3851	26.9881
ENSG00000236140	0.373165	0	0.145735	0.106829	0	0.0836436	0.260607	0.236394	0.130288	0.132262	0.131365	0.30075	0.220431	0.115314	0.125653
ENSG00000228084	0.289416	0.0802945	0.084771	0	0	0	0.15159	0.206258	0.151572	0.0769339	0.0764126	0.0437351	0	0	0
ENSG00000225075	0.2111	0	0.247327	0.1813	0.188236	0	0	0.200592	0.442225	0.112231	0.222941	0.382804	0.374095	0.489249	0.106623
ENSG00000196505	1.419	0.877635	1.03246	1.21093	1.07592	1.3067	0.998876	0.888894	1.15023	1.29739	1.24088	1.18825	1.2333	1.30291	1.14126
ENSG00000117360	13.2589	10.1335	10.8832	13.8558	13.1278	14.184	10.1715	9.30971	11.8041	16.7444	17.2048	17.7134	16.5468	16.053	16.3238
ENSG00000154451	2.52586	2.22178	2.54339	2.40922	2.06027	2.15638	2.88375	2.69324	2.78587	2.04215	2.32334	2.1776	1.53674	1.66717	1.71082
ENSG00000225871	0.254036	0.31324	0.231492	0.169692	0.100676	0.132863	0.266117	0.160928	0.0886952	0.0900388	0.149048	0.153555	0.200082	0.104668	0.142566
ENSG00000223489	0	0	0	0	0	0	0	0	0	0	0	0	0	0	0
ENSG00000118655	2.26668	1.754	2.29679	2.92532	3.61627	3.27086	1.93808	1.89772	2.19452	4.37736	4.283	4.50286	4.48365	4.7592	4.36902
ENSG00000230546	0	0	0	0	0	0	0	0	0	0	0	0	0	0	0
ENSG00000269713	7.62273	6.19185	7.2552	8.02699	6.5869	6.98593	6.25646	5.33168	5.47102	6.60117	7.29784	6.77369	6.56852	6.02242	6.71585
ENSG00000213262	0	0	0.0670592	0	0.0510374	0	0	0	0	0.0608595	0	0.0691944	0	0	0
ENSG00000274423	2.15042	0.550711	0.775218	0.852396	0.442502	0.556164	1.0397	0.47155	0.346525	0.615605	0.349391	0.399951	0.586278	0.230024	0.334196
ENSG00000285554	0	0.045535	0	0	0	0	0	0	0	0.0872584	0.0433335	0.0248021	0	0.0760771	0
ENSG00000232536	0.450493	0.29996	0.633365	0.3869	0.0803402	0.242344	0.377533	0.342456	0.471861	0.191603	0.38061	0.435688	0.159666	0.417629	0.0910145
ENSG00000287015	0	0	0	0	0	0	0	0	0	0	0	0	0	0	0
ENSG00000256374	0	0	0	0	0	0	0	0	0	0	0	0	0	0	0
ENSG00000268043	8.99351	7.21778	8.80368	7.0635	5.46252	5.82848	7.2707	6.89243	7.47463	5.07243	5.62308	5.88529	5.73985	5.87848	5.34562
ENSG00000241720	0	0	0	0	0	0	0	0	0	0	0.0619434	0	0	0	0
ENSG00000116489	26.8622	19.2164	21.2568	33.598	27.2053	33.391	16.8894	14.341	21.3472	33.4791	33.3095	35.6544	35.7564	36.9452	37.3537
ENSG00000235526	0	0	0	0	0	0	0	0	0	0	0	0	0	0	0
ENSG00000228347	0	0	0	0	0	0	0	0	0	0	0	0	0	0	0
ENSG00000276975	0.126264	0.119252	0.0818349	0.0438374	0.0431189	0.0289038	0.115383	0.0995571	0.0787888	0.148539	0.107812	0.181872	0.140442	0.129505	0.138402
ENSG00000236012	0	0	0	0	0	0	0	0	0	0	0	0	0	0	0
ENSG00000270911	0.11365	0	0	0	0	0.0509484	0	0	0	0	0	0.0457977	0.0335669	0	0
ENSG00000272824	0.536108	0.118988	0	0.0920857	0.0956085	0.5047	0.224641	0.203769	0.336921	0.114008	0.113236	0.259244	0.0950048	0.496997	0.324934
ENSG00000155367	0.263838	0.347692	0.521634	0.396539	0.661675	0.443538	0.431851	0.501411	0.449072	0.350673	0.452786	0.378763	0.292221	0.229303	0.249862
ENSG00000134200	0	0	0	0	0	0	0	0	0	0	0	0.0542547	0	0	0
ENSG00000143442	16.9444	16.292	16.5589	11.0161	10.5883	9.96172	17.8707	16.0354	14.2062	11.7749	12.3753	11.8107	11.3245	11.7503	11.2004
ENSG00000234257	0	0	0	0	0	0	0	0	0	0	0	0	0	0	0
ENSG00000274019	0.181578	0	0	0	0	0.0610502	0	0	0.0950953	0	0	0.274392	0	0	0
ENSG00000118292	0.223899	0.331294	0.262323	0.160244	0.133099	0.100372	0.508183	0.460968	0.664469	0.158714	0.236458	0.157894	0.165323	0.103782	0.188479
ENSG00000231128	0.029957	0.0332446	0.035098	0.0257281	0	0.0201443	0	0	0	0	0	0	0	0	0
ENSG00000065183	4.45049	3.41373	3.45275	5.62047	4.65934	5.42405	2.662	2.11667	2.41532	7.14487	6.66297	7.0083	7.12673	6.96471	6.96487
ENSG00000235942	0	0	0	0	0	0	0	0	0	0	0	0	0	0	0
ENSG00000023902	0.965139	0.920317	1.04701	1.37535	1.38972	1.24992	1.60268	1.63719	1.8496	2.39454	2.31036	2.3033	2.22345	1.99492	2.09434
ENSG00000227082	0.170079	0.0555129	0.140659	0.171847	0.0446052	0.201825	0.136245	0.0855598	0.115271	0.127655	0.12679	0.0846634	0.124106	0.21332	0.161701
ENSG00000228626	0.332575	0.369073	0.194825	0.142814	0.148277	0	0	0	0	0.176813	0	0	0.442022	0.308313	0.167978
ENSG00000226126	0	0	0	0.0309756	0.0643211	0.0485057	0	0	0.0377776	0	0.03809	0	0	0	0
ENSG00000163393	0.718467	0.58802	0.536626	0.447358	0.34435	0.446892	0.40454	0.341353	0.395086	0.620705	0.559591	0.531998	0.644564	0.532843	0.59876
ENSG00000131778	0.18732	0.0978245	0.142008	0.293364	0.0982538	0.170418	0.126971	0.104704	0.0923316	0.292907	0.279285	0.293059	0.361244	0.255374	0.322793
ENSG00000163156	8.76983	6.71913	9.05003	9.5021	8.46733	9.93929	9.67358	9.51984	12.4708	10.1432	9.55309	9.10123	10.3822	10.526	10.3257
ENSG00000143631	2.75246	2.8613	2.59982	1.92803	1.46666	1.55193	2.38274	1.97127	1.11363	2.71398	2.94988	2.66916	3.00999	2.80923	3.24446
ENSG00000254539	0	0	0.127791	0.187351	0.145888	0.110017	0.114259	0.155465	0.0571229	0.115976	0	0.13186	0.0483224	0.101115	0.220362
ENSG00000159377	166.998	170.921	163.805	188.665	209.923	212.115	174.916	168.201	199.61	173.798	181.759	178.255	185.753	193.601	190.841
ENSG00000270339	0	0	0	0	0	0	0	0	0	0	0	0	0	0	0
ENSG00000156150	0	0	0	0	0	0.0161276	0	0	0	0.0255019	0.0253291	0.0289944	0	0	0
ENSG00000169469	0	0	0	0	0	0	0	0	0	0.325633	0.404283	0.138836	0	0	0
ENSG00000228453	0	0	0	0	0	0	0	0	0	0	0	0	0	0	0
ENSG00000274642	0.111118	0.246626	0.0650938	0.143149	0	0.0747203	0.349207	0.158381	0	0.0590759	0.0586755	0	0.147686	0.0515059	0.0561238
ENSG00000177551	0	0	0	0	0	0	0	0	0	0	0	0	0	0	0
ENSG00000197323	5.67479	3.89354	4.44593	5.48823	3.91173	4.56256	3.56679	2.71023	3.47334	6.02875	5.78465	6.46962	5.62285	5.12356	5.76736
ENSG00000213244	3.18984	2.0228	1.46821	1.76114	2.33643	0.919276	1.90944	2.48981	1.43192	3.02835	3.24845	3.64967	3.23016	3.90764	3.10718
ENSG00000233029	0.0802573	0.0445325	0.062687	0.011488	0.0238549	0.0269841	0.0140123	0.0254208	0	0.0142229	0.0141265	0.0161707	0.0118521	0.0248008	0.0405365
ENSG00000237975	0.724482	0.435349	0.555991	0.410279	0.299029	0.425477	0.550144	0.414857	0.57659	0.464223	0.434348	0.472342	0.622313	0.604173	0.540096
ENSG00000261168	0.246833	0.239681	0.180745	0.291485	0.0275123	0.16598	0.387856	0.557049	0.549398	0.0328071	0.0977544	0.1119	0.19137	0.257429	0.0623354
ENSG00000287980	0	0.0390155	0.0411907	0	0	0	0	0	0.0368247	0	0.0371292	0	0.0311514	0	0
ENSG00000226716	0.0600658	0	0	0	0	0	0	0	0	0	0	0	0	0	0
ENSG00000229283	0	0	0	0	0	0	0	0	0	0	0	0	0	0	0
ENSG00000271419	0	0	0	0	0	0	0	0	0	0	0	0	0	0	0
ENSG00000244094	0	0	0	0.0602991	0	0	0	0	0	0.223963	0.519039	0.127318	0.0622106	0	0
ENSG00000178104	4.74211	3.12439	3.94382	2.75688	1.97197	2.55195	3.37165	3.14969	4.19969	2.37155	2.3591	2.34685	2.60256	2.46528	2.34316
ENSG00000226172	0	0	0.0850306	0	0	0	0	0	0	0.0771695	0	0	0	0.0672811	0.0733133
ENSG00000079335	0.422232	0.290836	0.255876	0.287602	0.201233	0.337774	0.259286	0.325123	0.335507	0.665697	0.691939	0.712862	0.599888	0.5534	0.551539
ENSG00000143119	0.132134	0.146635	0.180611	0.359357	0.392741	0.459068	0.207626	0.188335	0.230668	0.468324	0.604696	0.931809	0.25367	0.347067	0.40043
ENSG00000285215	0.166873	0.0370373	0.0391021	0.0573266	0.119039	0.0673272	0.104885	0.0951401	0.13983	0.0709742	0.0352466	0.100868	0.0295719	0.0309398	0.0674276
ENSG00000227733	0.0177144	0.00982923	0.0172954	0.00253563	0	0.00198531	0	0.0196381	0.0123697	0.00627856	0.018708	0.00713842	0.0209281	0.0109481	0.014912
ENSG00000237278	0	0	0	0	0	0	0	0	0	0	0	0	0	0	0
ENSG00000226167	0.519289	0.181982	0.384256	0.281674	0.146225	0.220541	0.085892	0.0259706	0.200391	0.174366	0.202048	0.231286	0.290603	0.35472	0.165653
ENSG00000285062	0	0	0	0	0	0	0	0	0	0	0	0	0	0	0
ENSG00000117362	63.2347	69.5081	66.8283	57.9648	60.9609	59.5063	74.9043	75.31	77.111	55.4701	56.0741	54.9999	37.2645	36.9263	36.5703
ENSG00000160685	20.948	22.9903	23.3301	16.6005	17.54	16.634	25.9592	26.3835	22.5992	12.6009	12.9807	12.2628	10.8615	10.0162	10.18
ENSG00000233432	0.0612299	0.0339748	0	0.0262932	0	0.0617601	0	0.0290911	0	0.0651056	0	0	0	0	0
ENSG00000227700	0	0	0	0	0	0	0	0	0	0	0	0	0	0	0
ENSG00000229911	0	0	0	0	0	0	0	0	0	0	0	0	0	0	0
ENSG00000224481	0.0419893	0.12426	0.0163984	0.0480826	0.0374415	0.0564706	0.058648	0.0132998	0.0293206	0	0.029563	0.00846027	0.0248034	0	0.0424161
ENSG00000143520	0.311652	0.34009	0.219082	0.178439	0.0880009	0.111769	0.255737	0.217169	0.0707274	0.138075	0.170052	0.178962	0.21171	0.134828	0.173151
ENSG00000171943	1.67988	1.01099	1.37772	1.80897	1.4288	1.5076	1.10323	0.994594	1.23846	1.59385	1.38517	1.51922	1.59725	1.82087	1.62516
ENSG00000196734	0	0	0	0	0	0	0	0	0	0	0	0	0	0	0
ENSG00000270719	0.221458	0	0	0	0	0	0	0	0	0	0	0	0	0	0
ENSG00000155761	2.96079	1.69102	1.94349	1.14717	0.812672	0.93711	2.10645	1.87408	2.1062	0.599901	0.473613	0.466365	0.675087	0.679492	0.701445
ENSG00000159208	3.59307	4.11661	3.91735	3.5716	3.5599	3.46758	4.9663	4.45746	4.93087	3.13069	3.33785	3.33824	3.06576	3.11505	3.27671
ENSG00000143373	10.5515	12.7989	12.5906	9.71851	9.90987	9.31757	13.4869	14.4413	11.0127	9.57793	9.39431	9.5443	9.12353	9.13566	8.88735
ENSG00000230806	0	0.0198539	0	0	0.0159528	0.0240606	0	0	0	0	0.018894	0	0.0317041	0.049756	0.0180723
ENSG00000116830	2.02948	1.62573	1.82569	4.52778	3.80655	4.02196	1.20228	1.10388	1.2559	5.40726	5.45438	5.53866	5.74612	5.80431	6.12677
ENSG00000143556	0.0975142	0.324648	0.114249	0.418744	0.34781	0.26229	0.919362	0.463302	0.714976	0.103687	0.102984	0.412604	0.0864036	0.0904003	0.0985054
ENSG00000286219	0.204008	0.0984333	0.103921	0.159974	0.0474553	0.0894672	0.0836253	0.0421421	0.0278718	0.132039	0.131144	0.134037	0.11003	0.106897	0.152321
ENSG00000227242	0.0265799	0	0.0311413	0.091311	0.023701	0.0536201	0.0835315	0.0252569	0.0835217	0.0282623	0	0.0321329	0	0	0.02685
ENSG00000234422	0.139388	0.30937	0	0.359134	0.372873	0.56238	0.146016	0.13245	0	0.592844	0.588826	0.842544	0.494025	0.387658	0.704024
ENSG00000163218	0.0208499	0	0.0732842	0.0179067	0.0743668	0.0140203	0.0436829	0	0.0218389	0.0443394	0.132117	0.0252059	0	0	0
ENSG00000231246	0	0	0	0	0	0	0	0	0	0	0	0	0	0	0
ENSG00000227056	0.0605261	0	0.212739	0.051982	0	0	0	0	0.0633969	0.0643572	0	0.109757	0.0536298	0.0561105	0
ENSG00000173207	21.7112	21.8238	21.5693	51.7471	59.8307	60.0185	17.7791	17.7245	20.1105	65.0354	70.8617	68.8617	70.0048	71.0087	67.5141
ENSG00000143614	6.06498	4.63118	5.33386	4.80374	3.68006	4.26794	4.68314	3.95086	4.34965	5.87649	5.34938	5.70512	5.57836	5.15675	5.33943
ENSG00000227091	0	0	0	0	0	0	0	0	0	0	0	0	0	0	0
ENSG00000236427	0.23875	0.132476	0	0	0	0.0802726	0.250104	0	0	0.634656	0.252142	0.28863	0	0.331999	0.361765
ENSG00000169418	1.24413	1.57184	1.67068	2.811	3.7975	3.01178	1.07271	1.24586	1.02247	0.376513	0.404283	0.387584	0.661427	0.798487	0.70573
ENSG00000285946	0	0	0	0	0	0	0	0	0	0	0	0	0	0	0
ENSG00000214204	0	0	0	0	0	0	0	0	0	0	0	0	0	0	0.0526084
ENSG00000081026	3.54285	2.4315	2.81782	2.77183	1.8332	2.05284	2.32474	1.78762	2.41886	3.30594	2.96233	3.53059	3.62827	3.24784	3.40247
ENSG00000232093	1.96025	4.41473	3.17479	2.77288	3.0846	2.51999	4.16733	4.10885	3.50256	2.14563	1.94843	1.84704	1.22605	2.03104	1.45601
ENSG00000225650	0	0	0	0	0.0436559	0	0	0	0	0	0	0	0	0	0
ENSG00000227179	0	0	0	0	0	0	0	0	0	0	0	0.0210946	0.030922	0	0
ENSG00000229035	0	0.24015	0	0.185853	0.192963	0.145517	0	0.20563	0	14.036	15.7692	10.8569	5.17711	4.01229	4.59062
ENSG00000116473	6.68216	4.27817	4.77764	5.53287	4.7591	5.76071	4.182	3.79345	6.44276	5.00091	4.7137	5.91882	5.45776	6.18673	6.0318
ENSG00000085465	2.03108	1.98267	2.0932	1.34058	1.15709	1.37843	2.52168	2.341	2.63957	1.11982	1.19167	1.07993	1.34975	1.42962	1.32982
ENSG00000224965	0.0633582	0.0703114	0.0742313	0.217657	0.112992	0.127814	0.199113	0.180614	0.132727	0	0	0.0382974	0	0	0.0640022
ENSG00000271380	0.118628	0.19747	0.0694931	0.050941	0	0.0398851	0.124269	0.112723	0.434891	0.252274	0.0626411	0.0717058	0	0.109974	0
ENSG00000228127	0	0	0	0	0	0	0	0	0	0.0207544	0.0206138	0.0117984	0	0.018095	0
ENSG00000226984	0.221976	0	0	0	0	0	0	0	0	0	0	0	0	0	0
ENSG00000226822	0	0	0	0	0	0	0	0	0	0	0	0	0	0	0
ENSG00000197364	0	0	0	0	0	0	0	0	0	0	0	0	0	0	0
ENSG00000273481	0.394112	0.109341	0.577183	0.423097	0.175713	0.0662541	0.412853	0.0936237	0.516006	0.104764	0.104055	0.536005	0.0873017	0.09134	0.398117
ENSG00000186150	0.283407	0.349455	0.368937	0.162267	0.112316	0.0635247	0.659742	0.568523	0.263866	0.167414	0.232792	0.152274	0.251116	0.204347	0.159049
ENSG00000143554	4.21069	5.24006	4.70998	3.66094	3.97868	4.07237	5.96291	6.18278	5.67182	4.6891	4.34623	4.24722	5.20487	4.93159	4.83987
ENSG00000143458	3.55349	2.98765	3.09983	2.9367	2.71793	2.76406	3.27405	3.09237	3.3763	2.75293	2.83231	3.11124	3.34968	2.9261	2.82897
ENSG00000230932	0	0	0	0	0	0	0	0	0	0	0	0	0	0	0
ENSG00000224363	0	0	0	0	0	0	0	0	0	0	0	0	0	0	0
ENSG00000223861	0.76593	0.424993	0.336515	0.164452	0.0853716	0.12876	0.601764	0.63683	0.300847	0.305404	0.303335	0.289358	0.424163	0.443783	0.0967144
ENSG00000118298	0.201301	0.382958	0.370616	0.160535	0.153855	0.135363	0.391622	0.519191	0.271091	0.443374	0.334073	0.391108	0.242066	0.306582	0.290495
ENSG00000143595	0.0206771	0	0	0	0	0	0	0	0	0.0439718	0.0436738	0.0124985	0	0	0
ENSG00000073754	0.0575843	0.0426026	0	0.0494555	0	0.038722	0.0402151	0.0364787	0.0201052	0	0.0202715	0.0116025	0	0	0.0387798
ENSG00000143546	2.65948	2.4201	3.11588	0.456811	0.474287	0.929937	3.17598	3.23469	2.72991	0.395894	0.561731	0.67517	0.565551	0.345165	0.268651
ENSG00000233712	0	0	0	0	0	0	0	0	0	0	0	0	0	0	0
ENSG00000228826	0.0871175	0.290034	0.306204	0.374098	0.155364	0.46865	0.0912602	0.331125	0	0.0926318	0.0920041	0.105318	0.154383	0.080762	0.088003
ENSG00000233907	0	0	0	0	0	0	0	0	0	0	0	0	0	0	0
ENSG00000225036	0	0	0	0	0	0	0	0	0	0	0	0	0	0	0
ENSG00000237842	0.681007	0.721392	0.76161	1.22292	0.966077	0.915873	1.10251	0.64711	0.907847	1.25074	1.04612	0.748438	0.685698	0.832202	1.06316
ENSG00000228420	0.199126	0.220979	0.233298	0.427541	0.355117	0.2678	0.41719	0	0.104285	0.21173	0.105148	0	0.0882188	0.0922995	0.20115
ENSG00000275296	0	0	0	0	0	0	0	0	0	0	0	0	0	0	0
ENSG00000233839	0	0	0.270854	0.0992729	0	0.0777274	0	0	0	0	0	0	0	0	0
ENSG00000261595	0.0446042	0.0494992	0	0.0574615	0.0596597	0.0449904	0.0233626	0.042384	0.0233599	0.0237137	0.023553	0.0404421	0.039522	0.0413502	0.0675863
ENSG00000250890	0	0	0	0	0	0	0	0	0	0	0	0	0	0	0
ENSG00000232240	0	0	0	0	0	0	0	0	0	0	0	0	0	0	0
ENSG00000143416	58.2173	71.99	68.5437	18.9224	20.631	19.6013	100.105	106.714	90.7825	23.3112	23.5708	23.0672	22.5061	23.7494	22.9727
ENSG00000227217	0	0	0	0	0	0	0	0	0	0	0	0	0	0	0
ENSG00000272583	0.102138	0.453387	0.478664	1.22807	0.546452	0.89286	0.106995	0.0970539	0.427929	0	0.215734	0.123476	0.271501	0.28406	0.206352
ENSG00000231827	0	0.0456734	0.0241099	0.0530203	0.036699	0	0.107785	0.117324	0.0431088	0	0.0869305	0.0373163	0.054701	0.0763084	0.0623625
ENSG00000280649	0.492733	0.795356	0.839698	0.961765	0.998558	1.14461	0.844632	0.681028	1.21988	0.381034	0.378452	0.487369	0.396901	0.539838	0.497741
ENSG00000260948	0.866782	0.649937	0.576384	0.824903	0.501342	0.441083	0.319027	0.44521	0.539829	0.473278	0.519553	0.807143	0.871809	0.608091	0.70994
ENSG00000131781	1.29884	1.05467	1.15059	0.652972	0.3531	0.473976	1.02875	0.940696	1.01204	0.530528	0.543661	0.59361	0.589462	0.602044	0.464016
ENSG00000286106	0.042657	0.0473384	0	0	0.0380369	0	0.0446855	0	0.0446802	0.0907141	0.135149	0.0515688	0.0377967	0	0.0430906
ENSG00000276509	0.0710169	0.105081	0.0277348	0	0.0422167	0.0477546	0.12399	0.044988	0.0743852	0.0251707	0	0.0143089	0.0209751	0.0219453	0.0478258
ENSG00000223599	0.108614	0.0401779	0.169672	0.0621878	0.0322834	0.0486909	0.0758527	0	0.0758438	0.153985	0.191177	0.0656527	0.0962387	0.302071	0.182863
ENSG00000121851	3.55897	3.4849	3.5872	3.46112	2.63681	3.30824	3.42667	3.63049	4.90641	4.20163	2.84659	3.62233	3.13028	3.90583	4.04454
ENSG00000233792	0	0.0472958	0.0499326	0	0	0	0	0	0	0	0	0.0257612	0	0	0.0430518
ENSG00000283342	0	0	0.026567	0.0389492	0	0	0	0.0646407	0.0475022	0.0482217	0.047895	0.0411193	0	0.0420426	0
ENSG00000226026	0.279187	0.284007	0.245324	0.139869	0.103728	0.10169	0.268091	0.232129	0.243691	0.0742146	0.0368558	0.0773469	0.206147	0.0970572	0.105759
ENSG00000224645	0	0	0	0	0	0	0	0	0	0	0	0	0	0	0
ENSG00000230921	0	0	0	0	0	0	0	0	0	0	0	0	0	0	0
ENSG00000286151	0	0	0	0	0	0	0	0	0	0	0	0	0	0	0
ENSG00000234388	0	0	0	0	0	0	0	0	0	0	0	0	0	0	0
ENSG00000134202	3.02311	3.91956	3.26136	3.00766	3.98569	3.26062	3.64764	3.54576	3.61586	3.79794	3.61415	3.49789	4.42022	4.61544	4.70673
ENSG00000285184	1.22907	1.05596	1.0529	0.839916	0.742419	0.835363	1.17676	1.18045	1.14894	0.941507	0.669942	0.798842	0.913382	0.784108	0.560706
ENSG00000235015	0	0	0	0	0	0	0	0	0	0	0	0	0	0	0
ENSG00000278273	0	0	0	0.0345517	0	0	0	0.0764567	0	0.0855547	0	0.0243179	0	0.0372959	0
ENSG00000271736	0	0	0	0	0.0769744	0.0193493	0	0	0	0.0611921	0	0.0347863	0	0	0
ENSG00000235988	0	0	0	0	0	0	0	0	0	0	0	0	0	0	0
ENSG00000233717	0.277146	0	0	0	0	0	0	0	0	0	0	0.167523	0	0.256927	0
ENSG00000231551	1.5228	1.20032	0.983776	0.867818	0.710661	0.870873	0.93924	1.25768	0.939131	0.665836	0.826655	0.886062	0.542241	0.59371	0.560682
ENSG00000163220	56.3244	47.0858	53.2963	43.5432	45.6515	47.4408	52.5047	59.1795	54.2312	28.5817	25.2435	26.1468	18.1746	19.1687	18.7985
ENSG00000224784	0	0	0	0	0	0	0	0	0	0	0	0	0	0	0
ENSG00000227295	0.248646	0.4139	0.378712	0.811475	0.532117	0.434719	0.338611	0.307151	0.260439	0.898908	0.577705	0.556096	0.660946	0.507114	0.602816
ENSG00000163155	8.44664	6.5846	7.48304	6.11827	5.29079	5.61633	7.66062	7.68506	9.08479	4.88245	4.94915	5.01428	5.12344	4.64221	4.73391
ENSG00000163216	0	0.0499933	0	0	0	0.030293	0	0	0	2.53875	2.61669	2.42351	0.399165	0.542917	0.318551
ENSG00000143603	0.153338	0.139227	0.130657	0.0838042	0.0497201	0.060929	0.113171	0.0794758	0.105857	0.0666998	0.0478456	0.0547694	0.0710213	0.142152	0.0985706
ENSG00000270392	1.33282	1.13776	1.08107	0.638375	0.639941	0.534297	0.698099	0.901147	0.67117	0.926619	0.784995	0.83662	0.999272	1.02173	0.983882
ENSG00000160688	13.1952	15.1013	15.0867	16.0114	19.5785	18.1107	12.9704	13.3788	12.7095	22.1929	22.9018	22.2101	21.2416	21.3606	22.4657
ENSG00000233008	0.00762541	0.0211556	0.00446702	0	0.00679951	0.00256382	0.011982	0.00724586	0.0159742	0.0162162	0	0.0092185	0.0101349	0.0106037	0.0115544
ENSG00000243613	0	0	0	0	0	0	0	0	0	0	0	0	0	0	0
ENSG00000224520	0.229263	0.363462	0.191862	0.534441	0.379659	0.198213	0.137237	0.248973	0.343053	0.34825	0.518834	0.27716	0.319221	0.394713	0.463186
ENSG00000116459	36.1556	39.8721	41.1041	49.509	54.3656	54.6167	36.3561	36.0781	41.7936	58.6458	52.6341	54.819	54.6915	51.831	52.7403
ENSG00000271121	0	0	0	0	0	0	0	0	0	0	0	0	0	0	0
ENSG00000241975	1.78837	1.81925	0.523821	1.27993	1.06312	0.801716	1.7173	1.41613	1.4049	1.90157	1.41652	1.53142	1.32051	0.967113	1.05382
ENSG00000271143	0.233458	0	0	0	0	0	0	0	0	0	0	0	0	0	0
ENSG00000163344	60.5879	74.113	70.0435	72.1829	86.7532	78.6528	77.9366	83.1897	72.3789	61.8078	68.2321	62.5248	62.4853	59.4563	57.8592
ENSG00000162738	0.15933	0.1277	0.0622245	0.197656	0.228896	0.255946	0.0741809	0.100933	0.0556292	0.122356	0.158919	0.160514	0.14902	0.131295	0.1073
ENSG00000270976	0	0	0	0	0	0	0	0	0	0	0	0	0	0	0
ENSG00000228217	0.338514	0.125221	0.396607	0.387637	0.100617	0.379384	0.236407	0.107221	0.35457	0.599901	0.119167	0.272824	0.299944	0.627636	0.911878
ENSG00000270342	0	0	0	0	0	0	0	0	0	0	0	0	0	0	0
ENSG00000143552	0.0321901	0.0267921	0.0282858	0.0207345	0.00717591	0.00541148	0.0505813	0.0382348	0.0337169	0.0256708	0.0339957	0.0194576	0.035653	0.0223813	0.0325173
ENSG00000186364	3.54653	5.33229	5.26097	3.88105	4.43757	4.13498	5.06343	4.94629	5.18267	4.50089	4.92347	4.21831	3.67463	3.89763	3.4959
ENSG00000246203	1.24865	0.944783	1.06395	1.23487	0.944711	1.09408	0.812562	0.898862	0.772835	0.885124	0.899106	0.777629	0.888456	0.666472	0.821783
ENSG00000175984	0.313261	0.163178	0.224707	0.373362	0.273631	0.262237	0.187519	0.206546	0.261156	0.360281	0.236309	0.370978	0.311556	0.242994	0.245406
ENSG00000143127	2.96864	1.86207	2.57077	2.13877	1.63836	1.81243	2.9746	2.59001	2.79134	0.500526	0.649482	0.592021	0.531461	0.556044	0.483184
ENSG00000186844	0	0	0	0	0	0	0	0	0	0	0	0	0.0671874	0	0
ENSG00000231100	0	0	0	0	0	0	0	0	0	0	0	0	0	0	0
ENSG00000241794	0	0	0	0	0	0	0	0	0	0	0	0.0423139	0	0	0
ENSG00000203783	0	0	0	0.0666152	0.172909	0.130394	0	0	0	0.123711	0.122873	0.117211	0	0	0
ENSG00000143549	21.6697	21.8929	21.3623	40.1728	42.9728	41.3177	17.8391	18.7727	17.6045	48.3502	44.5783	47.1374	43.1752	44.352	44.2095
ENSG00000116824	0	0	0	0	0	0	0	0	0	0	0	0	0.0256833	0	0
ENSG00000235887	0	0	0	0	0	0	0	0	0	0	0	0	0	0	0
ENSG00000235795	0.0706288	0	0.165499	0.0606586	0	0.189974	0.0739874	0	0.0739788	0.375497	0.298362	0.170769	0.250326	0.392857	0.142693
ENSG00000237460	0	0	0	0	0	0	0	0	0	0	0	0	0	0	0
ENSG00000236327	0.349756	0	0	0	0	0	0	0	0	0	0	0	0	0	0
ENSG00000233337	1.44708	0.802945	0.84771	0.776754	0.645175	0.729807	0.189487	0.257823	0.663127	0.577004	1.33722	0.874702	1.04179	1.25767	1.55315
ENSG00000088035	1.63242	0.84348	1.15361	1.89156	1.48642	1.70173	0.796211	0.828929	1.19418	2.28678	2.09797	2.19273	2.05101	2.40211	2.347
ENSG00000223804	0.899034	1.04521	1.10348	0.735355	0.572615	0.69091	0.717551	1.09837	1.21073	1.00146	1.53722	0.517552	0.872465	0.674695	0.994664
ENSG00000232671	0.191676	0.159534	0.22457	0.205773	0.213645	0.515563	0.100395	0.0910677	0.351343	0.662378	0.65789	0.434476	0.254755	0.488655	0.387249
ENSG00000236887	0.218396	0	0	0.187566	0	0.0734291	0.114391	0	0	0	0	0	0	0	0.110308
ENSG00000163354	2.65432	2.34622	2.83863	0.887993	0.949485	0.778286	5.54491	5.01507	3.75006	0.918898	0.765992	0.904822	0.711036	0.629476	0.717091
ENSG00000230779	0	0	0	0	0	0	0	0	0	0	0	0	0.045299	0	0
ENSG00000163206	0	0	0	0	0	0	0	0	0	0	0	0	0	0.0570579	0
ENSG00000024526	2.4001	1.19367	1.36367	4.86024	3.48579	4.97131	0.84088	0.648341	1.0762	8.35594	7.3329	8.68516	9.23201	9.80788	9.77095
ENSG00000236480	0.0933524	0.172662	0.0729153	0.187074	0.19423	0.146472	0.0651944	0.0295686	0.130374	0.23161	0.0657258	0.075237	0.082716	0.230779	0.125735
ENSG00000235756	0	0	0	0	0	0	0	0	0	0	0	0	0	0	0
ENSG00000225603	0.0853908	0.0315873	0	0.0977823	0.0507615	0.0382801	0.0596343	0.0270468	0.0596273	0	0.0300602	0.0688204	0.050441	0.0791613	0
ENSG00000173810	0	0	0	0	0	0	0	0	0	0	0	0	0	0	0
ENSG00000273136	3.47298	2.68315	3.05379	2.54462	2.33041	2.26959	2.92076	2.07834	2.25436	2.34052	2.28776	2.48365	2.52621	2.20256	2.52709
ENSG00000162825	0.686116	0.584212	0.871095	1.10353	0.725266	0.810337	0.606358	0.568988	0.731726	0.928513	0.656094	0.841523	0.7649	0.841915	0.728374
ENSG00000235005	0.105315	0	0	0	0	0	0	0	0	0	0	0.0636588	0	0	0
ENSG00000271890	0	0	0	0	0	0	0	0	0	0	0	0	0	0	0
ENSG00000169474	0	0	0	0	0	0	0	0	0	0	0	0	0	0	0
ENSG00000238107	0.024709	0	0	0	0	0	0	0	0	0	0.026095	0	0	0	0
ENSG00000198019	0.0559659	0.0124216	0	0	0.00998086	0.00752674	0	0	0.0117241	0.035705	0	0.0270633	0.0198357	0.0103766	0.0113069
ENSG00000286005	0	0	0	0	0	0	0	0	0	0	0	0	0	0	0
ENSG00000227425	0	0	0	0	0	0	0	0	0	0	0	0	0	0	0
ENSG00000233222	0	0	0	0	0	0	0	0	0	0	0	0	0	0	0
ENSG00000225279	0.0561848	0.0311754	0.0329135	0	0.0250498	0.0377809	0.0588566	0.0266941	0.0294249	0.0597412	0.118673	0.0679229	0.0497832	0.052086	0.170268
ENSG00000237976	0.306744	0.595713	0.449231	0.197582	0.410281	0.4641	0.321331	0.728689	0.0803232	0.16308	0.728887	0.509889	0.407691	0.639823	0.309862
ENSG00000281571	0.174235	0.0966782	0.204136	0	0.0776819	0.0878719	0.0456301	0.331125	0.182499	0.0926318	0.184008	0.131647	0.27017	0.121143	0.176006
ENSG00000229101	0	0	0	0	0	0	0	0	0	0	0	0	0	0	0
ENSG00000224927	0.13275	0	0	0	0	0	0	0	0	0.141153	0	0	0	0	0
ENSG00000239216	0	0	0.135427	0.297819	0	0	0	0	0	0	0.122074	0	0	0	0
ENSG00000163352	0.259682	0.792496	0.532432	0.334536	0.173667	0.305586	0.340038	0.863647	0.611997	0.138059	0	0.117725	0.287617	0.240737	0.196741
ENSG00000283360	0.164746	0.060942	0.128679	0.188653	0.19587	0.0738545	0.287634	0.104364	0.11504	0	0.0579956	0.0995822	0.0486583	0.0509091	0
ENSG00000270361	0.0686839	0.152443	0	0.176965	0	0.138557	0.0719501	0.0652652	0.0719417	0.0730315	0	0.0830333	0.121716	0.127347	0.069382
ENSG00000283227	0	0	0	0	0	0	0	0	0	0	0	0	0	0	0
ENSG00000225670	0	0	0	0	0	0	0	0	0	0	0	0	0	0	0
ENSG00000258465	0	0	0	0	0	0	0	0	0	0	0	0	0	0	0
ENSG00000288460	0	0	0.0547044	0	0	0	0	0	0	0	0	0.0282231	0	0	0
ENSG00000117262	2.8805	1.87258	1.98696	2.32018	2.08217	1.91977	1.84798	1.58721	3.15102	2.35602	2.40306	2.07083	2.60516	2.00672	2.54821
ENSG00000203782	0	0	0	0	0	0	0	0	0	0	0	0	0	0	0
ENSG00000227907	0	0	0	0	0	0	0	0	0	0	0	0	0	0	0
ENSG00000229002	0	0	0	0	0	0	0	0	0	0	0	0	0	0	0
ENSG00000163263	0	0	0	0	0	0.0472822	0.0736581	0.0668145	0	0.0747651	0.297034	0.127507	0	0.0651848	0.284116
ENSG00000274265	0.850426	0.845703	0.750513	0.796775	0.837103	0.794663	0.694182	0.682159	0.994877	0.399282	0.396576	0.547428	0.411016	0.399312	0.47974
ENSG00000284700	0	0	0	0	0	0	0	0	0	0	0	0	0	0	0.051477
ENSG00000237076	0	0	0	0	0	0	0	0	0	0	0.07328	0	0	0	0
ENSG00000143624	28.7059	27.0024	30.1523	24.712	23.9213	23.325	32.7034	30.25	30.2334	16.7058	17.4246	16.9574	17.3272	18.347	18.199
ENSG00000253831	0	0	0.0264405	0.0193819	0.0201233	0.0151753	0	0	0.023638	0	0	0	0	0	0.022797
ENSG00000287979	0.0361219	0.0400861	0	0.0620456	0.0644191	0.0728694	0.0378396	0.0343239	0	0	0.038148	0.0218342	0	0.0334867	0
ENSG00000227970	0	0	0	0	0	0	0	0	0	0	0	0	0	0	0
ENSG00000223345	5.45383	5.63496	4.84742	4.8993	4.36005	3.87814	4.85949	3.75275	3.5457	6.93219	7.54726	7.19951	5.99888	4.76539	5.63591
ENSG00000163221	0.781722	1.19283	0.343454	0.251764	0.0871319	0.0657077	0.716534	1.11422	0.51175	0.1039	0.206393	0.0590649	0	0.27176	0.197417
ENSG00000271567	0	0	0	0	0	0	0	0	0	0	0	0	0	0	0
ENSG00000270629	5.31454	4.84899	6.20805	3.58625	4.59084	4.50436	3.95176	4.36615	5.21456	2.8549	2.57664	3.00447	3.2935	2.08584	2.89598
ENSG00000261055	0.0250884	0.139208	0.0881816	0.0646404	0.178969	0.185575	0.0525628	0.0715188	0	0.0800292	0.0264956	0.0303298	0.0222298	0.0465162	0
ENSG00000231613	0	0	0	0	0	0	0	0	0	0	0	0.0562799	0.0824993	0	0
ENSG00000137947	6.7971	5.77188	6.13767	7.49857	7.18268	7.91655	6.03851	5.85215	7.55217	7.92611	7.69393	7.67235	6.42193	6.71899	6.79031
ENSG00000233328	25.2085	47.1223	42.3985	42.2414	74.3278	49.3468	44.3641	48.3333	31.3329	57.0629	41.6494	44.2903	46.5587	47.4659	45.2706
ENSG00000231700	0	0	0	0	0	0.0571115	0.0889705	0	0	0.180615	0	0	0	0	0
ENSG00000211451	1.24567	1.46615	1.34888	1.06982	1.41368	1.15492	1.73987	1.07606	1.08729	0.883009	0.757431	0.809996	0.836164	0.874842	1.04861
ENSG00000236689	0	0	0	0	0	0	0	0	0	0	0	0	0	0	0
ENSG00000233589	0.296199	0.273921	0.347031	0.805558	0.396178	0.497941	0.0517141	0.0469094	0	1.52225	1.61621	0.835522	1.44348	1.37295	0.797893
ENSG00000234604	0.473919	1.05186	0.55525	1.22106	0	0	0	0.45033	0	0.503917	1.001	1.14586	2.51953	1.75738	2.39368
ENSG00000117586	0.298965	0.145981	0.252195	0.184869	0.12796	0.217119	0.225491	0.181814	0.450929	0.127155	0.189441	0.0795133	0.10596	0.133034	0.0724809
ENSG00000239887	6.84562	6.79208	6.37257	3.00097	2.91002	3.16983	7.7582	7.48636	7.71125	6.64801	6.73061	6.93414	7.21451	7.01853	6.52671
ENSG00000175658	0	0	0	0	0	0	0	0	0	0	0	0	0	0	0
ENSG00000184330	0	0	0	0	0	0	0	0	0	0	0	0	0	0	0
ENSG00000014914	9.49497	8.74248	10.5901	6.46316	5.6752	6.60088	13.9533	12.4993	13.1917	5.42273	5.1123	5.34459	6.02512	6.40952	6.77476
ENSG00000243960	0.3853	0.244334	0.257956	0.283637	0.343569	0.259091	0.288302	0.104606	0.115307	0.234108	0.290652	0.232898	0.292628	0.408219	0.222409
ENSG00000230946	0	0	0	0.041575	0	0	0	0	0	0	0	0	0	0	0
ENSG00000226028	0	0	0	0	0	0	0	0	0	0	0	0	0	0	0
ENSG00000227667	0	0	0	0	0	0	0	0	0	0	0	0	0	0	0
ENSG00000162728	0.0338353	0.0125162	0.0396418	0.00968631	0.0100569	0.0151681	0.0236295	0.0428682	0.0118134	0	0.0357331	0.020452	0.0399735	0.0313669	0
ENSG00000229021	0.0461347	0.0255989	0.108104	0.108961	0.0617069	0.0853128	0.0845751	0.0657576	0.0120807	0.0981099	0.0852644	0.0766881	0.102196	0.0962304	0.104858
ENSG00000231029	0	0	0	0	0	0	0	0	0	0	0	0	0	0	0
ENSG00000223612	1.73496	5.06675	1.3908	1.49005	2.0356	2.21051	6.69593	3.55752	0.95645	3.30119	4.05031	3.09095	3.64094	2.45492	4.6121
ENSG00000203825	0	0	0	0	0	0	0	0	0	0	0	0	0	0	0
ENSG00000184371	27.1431	27.9833	29.8084	32.0145	30.1734	29.9578	29.2964	29.0677	25.2748	19.7315	19.0149	19.3219	18.7834	17.7902	16.7896
ENSG00000233449	0	0	0	0	0	0	0	0	0	0	0	0	0	0	0
ENSG00000242943	0	0	0	0	0	0	0	0	0	0	0	0	0	0	0
ENSG00000233203	0	0.137498	0.0725817	0.21282	0.0552405	0.0833156	0	0.0588667	0.194666	0.131743	0	0.112339	0	0.114862	0.312899
ENSG00000232366	0	0	0	0	0	0	0	0	0	0	0	0	0	0	0
ENSG00000232499	1.79619	3.62886	2.85989	4.19281	6.48874	4.70745	2.89479	2.71336	2.46028	9.25562	7.53915	7.57225	6.16211	5.42244	6.0947
ENSG00000143375	3.13033	2.81407	3.10524	0.725941	0.68345	0.645457	2.34121	1.76293	1.93577	2.93241	2.73098	2.49401	2.43727	2.29102	2.36618
ENSG00000271425	1.63341	1.5783	1.45366	1.42267	1.16814	1.47559	1.67651	1.49566	1.37907	0.950853	1.04199	0.837733	0.844989	0.841248	1.40001
ENSG00000232265	0	0.00822921	0	0	0	0	0	0	0	0.00788479	0	0	0	0	0
ENSG00000163154	0.0818513	0.227085	0.0958981	0.140594	0.109479	0.22016	0.257231	0.194443	0.171467	0.348129	0.129664	0.148427	0.0725253	0.03794	0.0826833
ENSG00000232995	0.718851	0.36261	0.612521	0.718401	0.454523	0.571273	0.410747	0.298067	0.588668	0.861634	0.565929	0.845332	0.926467	0.739108	0.765767
ENSG00000236957	0	0	0	0	0	0	0.0231989	0	0	0	0	0	0	0	0
ENSG00000143569	33.2937	35.6017	35.1222	37.9082	35.1848	35.0962	32.5677	29.5598	28.6869	42.3793	43.593	41.9942	42.1936	41.0594	41.8312
ENSG00000238087	0	0	0	0	0	0	0	0	0	0	0	0	0	0	0
ENSG00000227777	0	0	0	0	0	0.0515667	0	0	0.0803232	0	0	0	0	0	0
ENSG00000287218	0.146649	0.189866	0.0859077	0.0419824	0.0653826	0.0493062	0.256037	0.185799	0.102403	0.0259885	0.0258124	0.0590954	0.0866264	0.0679751	0.0246898
ENSG00000235700	0.152877	0.339309	0.179113	0	0.136319	0.411203	0.160147	0	0.160128	0.487662	0	0.277224	0	0.141724	0
ENSG00000223945	0.326841	0.181355	0.319109	0.0935676	0.097147	0.0366301	0.285319	0.103524	0.228229	0.0579215	0.287645	0.131708	0.193067	0.353496	0.110054
ENSG00000230832	0.0381885	0	0	0.0655953	0.0340523	0.0256795	0.080009	0.0362877	0.0399998	0.121817	0	0.0923335	0.101512	0.106208	0.308613
ENSG00000177173	0.696338	0.272738	0.479905	0.633219	0.584393	0.633508	0.214544	0.233533	0.257423	0.435538	0.259552	0.272352	0.290352	0.227837	0.455151
ENSG00000244619	0.116157	0	0	0	0	0	0	0	0	0.123509	0	0	0	0	0
ENSG00000184148	0	0	0	0	0	0	0	0	0	0	0	0	0	0	0
ENSG00000228697	0	0.024808	0	0	0.0199335	0.0150322	0.0117089	0	0.0117075	0.0237697	0.0118043	0	0	0.0310858	0.0112909
ENSG00000223656	0.082853	0	0.0970717	0	0	0	0	0	0.0867828	0	0	0	0	0	0
ENSG00000277406	0.452583	0.0358751	0.0378752	0.0277639	0.0864781	0.0217382	0.135459	0.18431	0.135443	0.0343736	0.136563	0.156325	0.057288	0.119876	0.0979678
ENSG00000238022	0	0	0	0	0	0	0	0	0	0	0	0	0	0	0
ENSG00000231671	0.038281	0	0	0.0657543	0.0341349	0	0	0	0	0	0	0	0	0	0
ENSG00000196184	0	0	0	0	0	0	0	0	0	0	0	0	0	0	0
ENSG00000162729	31.6495	45.5521	41.0439	40.5606	48.4706	41.1139	51.197	58.6888	45.8861	25.4486	25.7396	23.9605	25.1434	25.5607	24.2508
ENSG00000143158	4.45534	2.23291	3.43085	6.20249	4.53347	6.31807	2.93583	2.59477	5.7957	6.99142	5.9954	7.09104	6.63788	6.99489	6.73279
ENSG00000237008	0.0686839	0.0762216	0	0.0589883	0.0612449	0.0923717	0.21585	0.13053	0.143883	0.146063	0	0.166067	0.304291	0.127347	0.069382
ENSG00000271092	0.193338	0	0	0.0207557	0.0430994	0.081255	0.0253165	0.0459286	0.126567	0.0256969	0.0255228	0.102257	0.0428273	0.112021	0.0976514
ENSG00000230364	0	0.0401166	0.0423532	0.0310465	0	0	0	0.0343501	0	0.0384376	0	0	0	0	0
ENSG00000162739	0	0	0	0	0	0	0	0	0	0	0	0.0104321	0	0	0
ENSG00000238118	0	0	0	0	0	0	0	0	0	0	0	0	0	0	0
ENSG00000203785	0	0	0	0	0	0	0	0	0	0.617041	0.61286	0.740521	0.0571322	0.2391	0.195402
ENSG00000276118	0	1.09569	0	0	0	0	2.58571	0.938187	1.03416	0	0	0	0	0.915303	0
ENSG00000232148	0	0	0	0	0	0	0	0	0	0	0	0	0	0	0
ENSG00000287607	0.478706	0	0	0	0	0.321901	0	0	1.00282	1.01801	7.58337	1.73615	0.848326	0	0
ENSG00000159516	0	0	0	0	0	0	0	0	0	0	0	0	0	0	0
ENSG00000278811	3.57739	2.8168	2.78423	2.67006	2.52916	2.57168	2.80171	2.77612	3.37236	4.65516	5.01042	5.34933	4.48298	4.63508	4.40534
ENSG00000117281	0.584791	0.317862	0.363548	0.174246	0.117061	0.18458	0.425069	0.283512	0.22501	0.241109	0.189059	0.194776	0.200919	0.154894	0.277284
ENSG00000000460	0.611252	0.607858	0.483635	1.09084	1.19628	1.12633	0.374213	0.354531	0.465633	1.96671	1.97853	2.17848	1.7655	1.83981	1.94061
ENSG00000249730	0	0	0	0	0	0	0	0	0	0	0	0	0	0	0
ENSG00000188859	0	0	0	0	0	0	0	0	0	0	0	0	0	0	0
ENSG00000271439	0	0	0	0	0	0	0	0	0	0	0	0	0	0	0
ENSG00000264522	6.26362	5.37672	5.41309	5.5026	4.30642	4.83484	5.02668	4.43443	5.09917	5.69982	5.46881	6.06573	5.51218	5.39345	5.47373
ENSG00000163564	0	0	0	0	0	0	0	0	0	0	0	0	0	0	0
ENSG00000275075	0.957412	0	0	0	0	0.321901	0	0	2.00565	0	0	0	0.848326	0	0.483572
ENSG00000135862	75.0269	73.9016	74.7609	70.132	63.1933	65.1061	73.281	70.3381	65.1323	81.7985	84.5686	83.5144	75.1692	73.8606	75.3644
ENSG00000232952	0.559432	0.65039	0.842707	0.571977	0.688876	0.626975	0.558129	0.379705	0.669676	0.991405	0.675214	0.676308	0.660922	0.666797	0.780402
ENSG00000158473	0.054361	0.0723922	0.12738	0.0653621	0.0581679	0.0511763	0.136671	0.113641	0.113879	0.0809227	0.0229641	0.065718	0.0192669	0.0503952	0.0549135
ENSG00000227722	0.0282431	0	0	0	0.0503682	0	0	0	0.0295827	0	0	0	0	0	0
ENSG00000285636	0	0	0.0251472	0	0.019139	0	0	0	0	0.0228223	0.0226677	0.0259479	0.0190182	0	0.0433638
ENSG00000285922	0.0796949	0	0	0.022815	0.0236878	0.0357267	0.0834847	0.0504854	0.05565	0.0564929	0.16833	0.0481723	0.0941528	0.073881	0.10734
ENSG00000163191	503.859	541.812	540.021	887.54	982.895	975.59	474.195	441.448	517.967	662.468	675.948	687.56	655.31	657.8	652.896
ENSG00000233411	0	0	0	0	0	0	0	0	0	0	0	0	0	0	0
ENSG00000215853	0.0132788	0.0442081	0.0155576	0	0.0236811	0	0.0278204	0	0	0	0	0	0	0.01231	0.0134137
ENSG00000275801	0	0	0	0	0	0	0	0	0	0	0	0	0	0	0
ENSG00000143198	26.6565	29.5362	28.1625	23.6265	26.7189	24.8194	29.8046	29.1663	33.8391	25.684	25.0811	25.4268	19.9061	20.6141	20.643
ENSG00000203781	0	0	0	0	0	0	0	0	0	0	0	0	0	0	0
ENSG00000143318	0.241683	0.243824	0.28316	0.377394	0.450605	0.265938	0.253176	0.125266	0.13808	0.467239	0.556887	0.531228	0.837117	0.814734	0.998754
ENSG00000143297	0	0	0	0	0	0	0	0	0	0	0	0.00230759	0	0	0
ENSG00000162736	62.2141	57.7109	58.7105	49.1359	47.5579	47.8448	60.4856	54.0265	56.1767	38.486	38.831	38.0427	39.4	38.4999	38.0578
ENSG00000117560	0	0	0	0	0	0	0	0	0	0	0	0.0317413	0	0	0
ENSG00000232188	0	0	0	0	0	0	0	0	0	0.175275	0.0870439	0.19928	0.0730298	0.0764079	0
ENSG00000232212	0	0	0	0	0	0	0	0	0	0	0	0	0	0	0
ENSG00000135823	5.30479	3.99502	4.22631	4.56852	4.13651	4.62992	3.80179	3.60848	4.63672	5.944	5.2778	5.60369	5.35518	5.25695	5.43262
ENSG00000171722	0.794994	0.825322	0.811242	0.220248	0.205807	0.206937	0.886528	0.511739	0.322336	0.46356	0.595836	0.635555	0.477183	0.40416	0.388584
ENSG00000143621	96.4397	95.7652	100.22	139.801	145.748	147.882	83.0427	82.358	98.8843	163.188	165.823	166.988	174.283	179.43	176.165
ENSG00000241042	0	0	0	0	0	0	0	0	0	0	0	0	0	0	0
ENSG00000143155	10.2043	7.87408	8.76619	12.5836	10.3326	12.1331	6.80951	5.69626	8.49142	14.1084	13.3059	13.9636	13.2856	13.4589	12.8925
ENSG00000260322	0	0	0	0	0	0	0	0	0	0	0	0	0	0	0
ENSG00000213060	0.112038	0	0	0	0	0.150677	0	0	0.234703	0.119129	0	0.0677222	0.198544	0	0
ENSG00000223495	0	0	0	0	0	0	0	0	0	0	0	0	0	0	0
ENSG00000241666	0	0	0	0	0	0	0.0196772	0	0.0196749	0	0	0	0	0	0
ENSG00000143156	3.68825	2.71335	3.44725	3.43809	2.86752	3.50562	3.25587	2.81161	4.5056	4.40641	4.54286	4.74936	5.4932	5.57826	6.20398
ENSG00000229612	0	0	0	0	0	0	0	0	0	0	0	0	0	0	0
ENSG00000198771	0.359865	0.264092	0.346819	0.0747738	0.0983368	0.144412	0.273613	0.248192	0.28574	0.0740601	0.110337	0.0842028	0.0360006	0.0484275	0.0469062
ENSG00000224943	0	0	0	0	0	0	0	0	0	0	0	0	0	0	0
ENSG00000225462	0.265501	0.343745	0.362909	0.950091	1.22318	1.04145	0.231772	0.546619	0.185396	0.0941022	0.233661	0.320969	0.274458	0.20511	0.312899
ENSG00000237756	0.202098	0	0.11839	0.0867844	0	0.0679493	0.105854	0.0960192	0	0.322335	0.213434	0.24432	0.179071	0.374708	0
ENSG00000116147	0	0	0	0	0	0	0	0	0	0.00393501	0.011725	0	0	0	0.00373837
ENSG00000213064	3.19411	2.21775	2.33149	2.30415	2.09091	2.19614	1.95183	1.81465	2.26138	3.1492	2.87353	2.99821	3.37674	3.25093	3.00891
ENSG00000203307	0	0.0885403	0.0934764	0	0	0.0536502	0.0835784	0	0	0.0848345	0.0842596	0	0.141388	0.147928	0.0805953
ENSG00000143179	8.17687	8.80314	7.99802	12.4483	13.814	13.356	5.94979	5.57109	5.74297	13.7379	13.9243	13.9664	13.4142	14.2989	13.6204
ENSG00000271187	0	0	0	0	0	0	0	0	0	0	0	0	0	0	0
ENSG00000260360	0.0754048	0.12552	0.0883453	0.0647604	0.0672378	0.0253526	0.0394953	0.0716515	0.0789813	0.0400889	0.0796344	0.0911583	0.0334066	0.0699038	0.0380856
ENSG00000224968	0	0	0	0	0	0	0	0	0	0	0	0	0	0	0
ENSG00000274562	0	0	0	0	0	0	0	0	0	0	0	0	0	0	0.0862588
ENSG00000276756	0	0	0	0	0	0	0	0	0	0	0	0	0	0	0
ENSG00000143315	5.50145	3.8335	4.18923	4.03086	3.06825	3.81712	2.91327	2.61061	3.46307	5.02628	4.55843	4.86803	4.89849	4.77549	4.86355
ENSG00000227094	0	0	0	0	0	0	0	0	0.096015	0.0974694	0.096809	0	0.162445	0	0
ENSG00000286966	0	0	0.0649415	0.0952091	0.0988514	0.111818	0	0.10534	0	0.294688	0.35123	0.301542	0.245568	0.102771	0.167978
ENSG00000116199	6.92928	4.76694	5.4276	6.98785	5.50079	6.76264	4.17134	3.7242	4.54853	10.4934	10.2733	10.7176	8.69569	8.53839	8.65462
ENSG00000231175	0	0	0	0	0	0	0	0	0	0	0	0	0	0	0
ENSG00000143185	0	0	0	0	0	0	0	0	0	0	0	0	0	0	0
ENSG00000235145	0	0	0.0676309	0.049576	0	0.0388163	0	0.109703	0.0604626	0	0.0609625	0	0.0511475	0	0
ENSG00000007933	0.110246	0.0458793	0.0484371	0.0236708	0.0122882	0.00926671	0	0.0130948	0.0288687	0	0	0.0249897	0.0122106	0	0
ENSG00000280778	0	0	0	0	0	0	0	0	0	0	0	0	0	0	0
ENSG00000116260	31.7479	36.1846	36.4181	33.7208	35.2568	32.4248	37.2181	40.9744	36.8017	35.6588	35.5898	34.5141	33.4316	34.135	33.7531
ENSG00000117475	5.03694	2.72602	3.05242	5.25289	3.47364	4.5383	2.0794	1.73295	3.35263	6.47705	5.59462	7.17662	6.4747	7.30326	7.33143
ENSG00000272931	0	0.0756733	0.159784	0	0.0608042	0.0458536	0.0714325	0.0647957	0.142848	0	0.0720147	0	0.120841	0.12643	0.137766
ENSG00000143340	0	0	0	0	0	0	0	0	0	0	0.0172053	0	0	0.015103	0
ENSG00000143190	1.3451	0.964526	1.05986	1.66555	1.27586	1.44322	0.764921	0.713516	0.749349	2.79447	2.71934	2.94667	2.87876	2.60083	2.71755
ENSG00000225475	0	0	0	0	0	0	0	0	0	0	0	0.203167	0	0	0
ENSG00000213062	0.144457	0.078291	0.11808	0.0750159	0.0569164	0.0768072	0.0950188	0.0446914	0.0879701	0.150028	0.149012	0.18479	0.107161	0.115232	0.118776
ENSG00000230898	0	0	0	0	0	0	0	0	0	0	0	0	0	0	0
ENSG00000234998	0.516252	1.03123	1.93551	1.0641	1.38101	0.763726	1.29792	0.981111	0.540738	2.19572	1.96275	2.87089	1.73824	2.01008	2.71179
ENSG00000232223	0	0	0	0	0	0	0	0	0	0	0	0	0	0	0
ENSG00000232678	0	0	0	0	0	0.12257	0	0	0.190922	0	0	0	0.323016	0	0
ENSG00000224698	0	0	0	0	0	0	0	0	0	0	0	0	0	0	0
ENSG00000159348	8.88796	9.26665	8.90624	7.65141	7.74669	7.87666	10.7022	9.73795	10.712	7.66806	8.28418	8.13828	7.28673	6.82232	7.54049
ENSG00000287697	0.111861	0	0.174744	0.160118	0.0332486	0.15044	0.234361	0.141725	0.117167	0.158589	0.27565	0.0901541	0.132155	0.172835	0.301329
ENSG00000075945	5.23615	4.34224	4.11586	4.89764	4.86428	4.82697	4.23852	4.12516	4.956	4.96021	4.88638	5.07557	5.26378	5.42783	5.40477
ENSG00000235303	0.0246448	0	0	0	0	0	0	0	0	0	0.0260272	0	0.0218368	0	0.0248953
ENSG00000162779	0	0.0345495	0.0182378	0.0200535	0.00694021	0.00523374	0.0163066	0	0	0.0413793	0.0246593	0.0282278	0.0275856	0.0144308	0.0314492
ENSG00000273160	0	0	0	0	0	0	0	0	0	0	0.165182	0.0945428	0.277176	0	0
ENSG00000122432	0.110729	0.0245761	0.0648657	0.0665685	0.0394943	0.0372292	0.0695966	0.0631304	0.150775	0.0353213	0.0584699	0.0535448	0.0196225	0.0410603	0.0223708
ENSG00000234810	0	0.00620126	0	0	0	0	0.00585374	0	0.00585306	0.0118834	0.00590145	0.0101332	0.00990264	0.00518035	0.0112896
ENSG00000232750	0.688836	0.305773	0.80705	0.591597	0.245692	0.18528	0.577274	0.39273	0.288603	0.292975	0.145495	0.166549	0.24414	0.127717	0
ENSG00000224468	1.28621	0.548987	0.81143	0.849726	0.705786	0.93143	0.725509	1.22219	1.03632	1.57803	1.25387	1.97356	1.84099	1.46754	0.799559
ENSG00000235628	0	0	0	0	0	0	0	0	0	0	0	0	0	0	0
ENSG00000224600	0	0	0	0	0	0	0	0	0	0	0	0	0	0	0
ENSG00000272419	0.359978	0.191057	0.302564	0.268837	0.300055	0.273637	0.311514	0.193338	0.147542	0.649035	0.702488	0.600744	0.54085	0.558613	0.52174
ENSG00000232551	0	0	0	0	0	0	0	0	0	0	0	0	0	0	0
ENSG00000229785	0.15077	0.27886	0.294406	0.0431621	0.358507	0.168973	0.210586	0.38204	0.105281	0.106875	0.106151	0.15189	0.133591	0.372721	0.152302
ENSG00000092607	1.49463	1.45284	1.15038	0.665247	0.603143	0.594228	1.36	1.19217	1.37126	0.301608	0.380216	0.32313	0.444668	0.313529	0.385722
ENSG00000238270	0	0	0	0	0	0	0	0	0	0	0	0	0	0	0
ENSG00000285894	0	0	0	0.0289487	0	0.0226659	0	0.0640583	0	1.6845	1.21032	1.95595	0.567461	0.59371	0.68099
ENSG00000234425	0	0	0	0	0	0	0	0	0	0	0	0	0	0	0
ENSG00000236025	0	0	0	0	0	0	0	0	0	0	0	0	0	0	0
ENSG00000230687	0	0	0	0	0	0	0	0	0	0	0	0	0	0	0
ENSG00000230704	0	0	0	0	0	0	0	0	0	0	0	0	0	0	0
ENSG00000283255	0	0	0	0	0	0	0	0	0	0	0	0	0	0	0
ENSG00000227741	0.660724	0.633248	0.774113	0.7738	0.937303	1.02996	0.346072	0.399532	0.346031	1.30929	1.42729	0.94399	1.27733	1.14152	1.45623
ENSG00000237049	0	0	0	0	0	0	0	0.254424	0	0	0	0	0	0	0
ENSG00000269887	1.78962	0.956235	0.310629	0.512332	0.650138	0.93599	0.694344	0.755799	1.94393	0.845735	0.770004	0.96156	1.23334	0.614469	0.535649
ENSG00000235082	1.40305	1.03802	1.09589	1.20499	1.66812	1.0483	1.14315	1.33321	0.816443	2.15491	3.29278	2.0731	2.62451	1.87878	1.57479
ENSG00000286754	0	0	0	0	0	0	0	0	0	0	0	0	0	0	0
ENSG00000232751	0	0	0	0	0	0	0	0	0	0	0	0	0	0	0
ENSG00000254913	0	0	0	0	0	0	0	0	0	0	0	0	0	0	0
ENSG00000287831	0	0	0	0.0161644	0	0	0.0197163	0	0	0	0	0	0	0	0
ENSG00000236364	0.626113	0.534481	0.639516	0.703183	0.644191	0.518182	0.504528	0.213571	0.26905	0.648674	0.762961	0.718103	0.697024	0.610202	0.632477
ENSG00000117091	0	0	0	0	0	0	0	0	0	0	0	0	0	0	0
ENSG00000235378	0	0	0	0	0	0	0	0	0	0	0	0	0	0	0
ENSG00000163209	0	0	0	0	0	0.0221154	0	0.0312512	0	0.20982	0.208398	0.278314	0	0.0914668	0.066445
ENSG00000229588	0	0	0.073252	0	0	0	0	0.0594103	0	0	0	0	0	0	0
ENSG00000122218	88.3359	85.1146	84.7392	79.5402	75.7726	76.0352	81.3198	71.7494	75.9318	65.3952	67.2045	65.9972	65.894	65.879	67.2211
ENSG00000143171	0	0.019544	0	0.0151252	0	0.0118425	0	0	0.0184466	0.056178	0	0.0319359	0.0624186	0	0
ENSG00000272033	0	0.0833485	0.0293318	0	0	0	0	0.0237892	0.0262228	0	0.0264396	0.0151328	0	0.0464179	0.0505796
ENSG00000275767	0	0	0	0	0	0	0	0	0	0	0	0	0	0	0
ENSG00000224718	0	0	0	0	0	0	0	0	0	0	0	0	0	0	0
ENSG00000047410	13.5844	9.96923	10.7498	12.4643	9.98475	11.4803	9.704	8.28097	10.3982	18.9244	17.4142	18.9067	17.5619	17.1718	17.9865
ENSG00000231992	0	0.250442	0	0	0	0	0	0	0	0.11998	0.119167	0.0682059	0	0.209212	0.113985
ENSG00000270209	0	0	0	0	0	0	0	0	0	0	0	0	0	0	0
ENSG00000018625	0.90299	0.876827	0.899262	0.226193	0.201297	0.232762	1.28489	1.48728	0.937938	0.744114	0.532449	0.57766	0.94679	0.662715	1.01859
ENSG00000171806	2.10631	1.26891	1.3749	1.29212	1.2074	2.02338	0.724983	1.34384	2.23773	1.85569	1.68423	1.87339	1.81299	2.00844	1.97574
ENSG00000224261	0.588387	0.593599	0.376016	0.41345	0.715445	0.79131	0.840501	1.06737	1.34464	0.853133	0.338941	0.872974	0.521347	0.7934	0.540334
ENSG00000287919	0	0	0	0	0	0	0	0	0	0	0	0	0	0	0
ENSG00000229914	0	0	0	0	0	0.0638642	0	0	0	0	0	0	0	0	0
ENSG00000213088	0	0	0	0.0386533	0.10033	0.0453963	0	0	0	0.0239277	0.0712966	0.108819	0.0199393	0	0
ENSG00000198574	0.016956	0	0.0198658	0.072812	0.0755974	0.0456075	0	0.032224	0.0177602	0.0180292	0	0.0409968	0.030048	0.031438	0.0171283
ENSG00000203739	0.454457	0.47144	0.370398	0.364849	0.466901	0.405245	0.517465	0.488163	0.320791	0.462213	0.511249	0.489683	0.420184	0.375509	0.309377
ENSG00000233882	0	0	0	0	0	0	0	0	0	0	0	0	0	0	0
ENSG00000198358	0	0	0	0	0	0	0	0	0	0	0	0	0.0196592	0	0
ENSG00000229407	0	0	0	0	0	0	0	0.0749301	0	0	0	0	0	0	0
ENSG00000235575	0	0	0	0	0	0	0	0	0	0	0	0	0	0	0
ENSG00000134216	0.418494	0.736278	0.585984	0.00876629	0	0.0274549	1.20826	1.38697	1.44333	0.0108533	0	0	0	0.00946253	0.0206218
ENSG00000234761	0	0	0	0	0	0	0	0	0	0	0	0	0	0	0
ENSG00000230748	0	0	0	0	0	0	0	0	0	0	0	0	0	0	0
ENSG00000254154	0.0181323	0.00670742	0	0.00519091	0.0161685	0.00406431	0.0189946	0.0114865	0.0126616	0.0257068	0.0127663	0.0219205	0.00535546	0.0112064	0.0183166
ENSG00000286600	0	0	0	0	0	0	0	0	0	0	0	0	0	0	0
ENSG00000162694	5.04019	2.56742	3.20842	4.97749	3.37861	4.97668	2.23807	1.81702	3.35053	3.77781	3.77714	4.00979	3.97435	3.31561	4.14944
ENSG00000163207	0	0	0	0	0.0196371	0.0148087	0	0	0	1.26448	1.67454	1.3844	0.624418	0.734965	0.600645
ENSG00000132716	6.65543	4.89622	5.78979	4.92918	4.17866	5.12071	4.93518	4.39375	5.7244	4.73106	4.7319	4.99854	6.00203	5.5402	5.40113
ENSG00000288574	0	0	0	0	0	0	0	0	0	0	0.0245465	0.0140493	0	0	0
ENSG00000238108	0	0	0	0	0	0	0	0	0	0	0	0	0	0	0
ENSG00000214262	0	0	0	0	0	0	0	0	0	0	0	0	0	0	0
ENSG00000183853	54.2551	55.0849	52.1676	41.8239	36.9122	37.3091	47.022	40.1876	35.0858	40.9945	40.9265	40.4442	38.4715	37.9404	38.6723
ENSG00000143401	10.7799	6.91513	7.5933	18.0534	13	17.7596	5.06784	4.43459	8.30313	25.4684	22.8523	27.4386	24.9856	27.2016	27.8875
ENSG00000215835	2.06994	2.53749	2.31237	2.87332	3.06909	2.57341	2.0423	1.89829	1.23532	3.0967	3.17739	3.04069	2.38858	2.52138	2.82039
ENSG00000118197	2.96602	2.69524	3.1099	3.12879	2.62561	3.15792	2.89318	2.46099	3.71454	3.33659	3.20049	3.52722	3.21844	2.89908	3.31099
ENSG00000135842	1.1151	0.801837	0.986519	0.786675	0.517457	0.69628	0.911857	0.837949	0.977301	2.0568	1.95875	2.1803	0.972927	1.0865	1.0115
ENSG00000227621	0	0	0	0.0503114	0.052236	0.0393921	0	0	0	0	0	0	0	0	0
ENSG00000229258	0	0	0	0	0.0267462	0	0	0	0	0	0	0	0	0	0
ENSG00000287472	0	0	0	0	0	0	0	0	0	0	0	0	0	0	0
ENSG00000227776	0.0506324	0.056189	0	0	0	0	0	0	0	0	0	0	0	0	0
ENSG00000198734	0.0101124	0.00561111	0.00592393	0	0	0.0034	0.00529666	0	0	0.00537626	0	0	0.00448012	0.00468735	0
ENSG00000242193	2.48206	2.14236	2.36277	2.1909	1.93658	2.01096	2.26606	2.31757	2.06719	3.07903	2.53027	2.80266	2.27562	2.25305	2.22
ENSG00000077152	3.95889	2.51504	3.69719	9.95373	8.92759	10.6485	2.34404	2.12626	2.79449	20.9559	22.0257	21.3635	20.1572	20.7705	22.4009
ENSG00000241318	0.0510689	0	0.059833	0	0.0455377	0	0.106995	0.0485269	0	0	0.1618	0.185214	0.0905003	0	0
ENSG00000143164	13.5502	11.034	12.063	11.8117	10.9568	11.871	11.1636	10.6548	14.6573	13.1293	13.4451	14.455	11.094	11.851	12.0633
ENSG00000271546	0	0	0	0	0	0	0	0	0	0	0	0	0	0	0
ENSG00000255148	0	0	0	0.0734691	0	0.0575239	0	0.162574	0.268807	0	0.0903434	0.103417	0	0	0
ENSG00000133048	56.3686	66.2142	58.2658	34.1179	35.4231	32.0104	80.5283	68.3462	50.3925	18.3556	18.7074	18.0159	15.2211	15.7161	15.6874
ENSG00000229699	0	0	0	0	0	0	0	0	0	0	0	0	0	0	0
ENSG00000228238	0.185669	0.154534	0.054383	0.0398647	0	0.0624255	0.243122	0.176427	0.194475	0.0987105	0	0.140286	0.0822569	0.0860618	0
ENSG00000232393	0	0	0	0	0	0	0	0	0	0	0	0	0	0	0
ENSG00000121454	0.576335	0.302506	0.337621	0.301	0.243067	0.303756	0.375299	0.22942	0.261047	0.496878	0.633339	0.456649	0.427857	0.483749	0.527121
ENSG00000126070	1.09109	0.711085	0.85835	0.779288	0.665259	0.801489	0.628989	0.666351	0.786145	0.840934	0.750055	0.85995	0.956848	0.866104	0.862282
ENSG00000275140	0	0.0913071	0	0.141326	0	0.0553268	0	0	0.0861801	0.0874856	0	0.1492	0	0	0
ENSG00000184155	0	0	0	0	0	0	0	0	0	0	0	0	0	0	0
ENSG00000163157	2.03145	1.31268	2.0788	1.32508	1.21526	1.2277	1.99337	1.85703	1.34671	1.55851	1.30353	1.1813	1.57214	1.07274	1.63648
ENSG00000224308	0	0	0	0	0	0	0	0	0	0	0	0	0	0	0
ENSG00000117036	5.72349	4.16383	4.47048	5.06119	4.57433	4.65646	3.93049	3.33031	3.82641	5.24428	5.28337	5.27912	5.22162	4.91291	5.02505
ENSG00000058085	6.92328	6.6887	6.29065	8.11633	8.28325	8.13887	5.57321	5.85362	5.41858	17.09	17.0186	16.769	9.55833	9.69545	9.87172
ENSG00000188460	1.22057	1.8216	1.33142	2.02425	2.51452	1.69813	0.749533	1.9197	0.617191	3.62498	2.75587	2.6713	2.90887	2.92637	2.38093
ENSG00000260088	1.86734	2.00082	1.43339	0.442412	0.459336	0.692787	3.50757	2.56982	2.76526	0.616203	0.408018	0.350297	0.6276	0.596937	0.390274
ENSG00000287978	3.26351	3.9366	3.40797	1.27955	1.51829	1.81286	7.06037	7.07854	7.50541	1.05611	1.12388	1.20075	1.38297	0.920784	1.43334
ENSG00000183155	5.25733	5.04177	4.9312	6.36824	6.27313	6.84569	4.02704	3.89834	4.42445	8.5144	8.02344	8.14666	6.63742	6.07111	6.50799
ENSG00000117533	1.81545	0.907138	1.30293	1.63265	0.983161	1.46366	0.776645	0.858029	1.1947	1.73834	1.45553	1.69489	1.7602	1.64777	1.7667
ENSG00000116815	16.0452	10.495	11.4225	17.2253	15.397	16.345	8.73806	8.12815	9.98917	8.3892	7.93958	8.92794	8.23837	7.73287	8.64086
ENSG00000225487	0	0	0	0	0	0	0	0	0	0	0	0	0	0	0
ENSG00000224620	0	0	0	0	0	0	0	0	0	0	0	0	0	0	0
ENSG00000232917	0	0	0	0.139869	0.14522	0.219026	0	0	0	0	0	0	0	0.150978	0.164514
ENSG00000233057	0	0	0	0	0	0	0	0	0	0.0366219	0	0	0	0	0
ENSG00000237131	0	0	0	0	0	0	0	0	0	0	0	0	0	0	0
ENSG00000116741	3.72235	2.61957	2.76561	3.04095	2.44891	2.77779	2.82942	2.95475	4.58835	2.36513	2.15734	2.88111	2.45356	2.77747	2.47622
ENSG00000233946	0	0	0	0	0	0	0	0	0	0	0	0	0	0	0
ENSG00000122482	3.85168	2.17177	2.8186	3.21697	1.91177	2.85825	1.86726	1.55164	2.63083	3.60509	3.54117	3.84264	3.94298	4.00403	3.99786
ENSG00000215861	3.62436	2.3929	2.0963	2.20649	2.08636	0.802104	6.05551	4.6646	7.49642	0.585383	0.629867	0.61009	1.34147	1.36099	0.834196
ENSG00000123843	0	0	0	0	0	0.00995571	0.0155094	0	0	0	0.0469074	0.0268477	0.0524738	0.0686263	0.0448675
ENSG00000143167	0.0321737	0.0892616	0.0565428	0.124344	0.114756	0.140627	0.0168519	0.0458585	0.0336998	0.0855256	0.0849461	0.0972386	0.0997776	0.0596532	0.0812519
ENSG00000143184	0.0386242	0	0.0452527	0	0	0.0259725	0	0	0	0	0	0.0233468	0	0	0
ENSG00000231966	0.537019	0.446965	0.157295	0.115303	0.478855	0.270835	0.281278	0	0.421868	0.285505	0.425356	0.324606	0.118958	0.622302	0.542477
ENSG00000203685	0.00604257	0.0268229	0.0141591	0.00518958	0.00538811	0.00406327	0.0126598	0.0114836	0.00632918	0.0128501	0.00638152	0.00365249	0.00535409	0.00560175	0
ENSG00000131788	16.3692	15.014	16.3941	15.7438	14.7458	15.0124	16.3316	15.011	14.9973	13.3581	14.736	14.5557	15.4391	14.3066	15.669
ENSG00000176320	0	0	0	0	0	0	0	0	0	0.0252085	0	0	0.0210066	0	0
ENSG00000260976	0	0	0	0	0	0	0	0	0	0	0	0	0.0295096	0	0
ENSG00000235215	0.149501	0	0	0	0.133309	0	0	0	0	0	0	0	0	0.138595	0
ENSG00000223450	0	0	0	0.109709	0.113906	0	0	0.242765	0	0	0.134906	0	0	0	0
ENSG00000233771	0.0641877	0.166208	0.0752032	0.0918779	0.0381571	0.100712	0.06724	0.0813237	0.0672322	0	0.135576	0.0905306	0	0.019835	0.0648401
ENSG00000171786	0.500423	0.205682	0.608017	0.429781	0.314009	0.324041	0.407727	0.42268	0.368852	0.354732	0.450198	0.392111	0.361293	0.395188	0.524232
ENSG00000224691	0	0	0	0	0	0	0	0	0	0	0	0	0	0	0
ENSG00000286572	0	0.123265	0.108447	0.0476975	0.115552	0.024897	0.0193928	0.0879551	0.0581716	0	0.0586526	0.0335701	0.0492095	0.0343239	0.0374013
ENSG00000272880	0	0	0	0	0	0	0	0	0	0	0	0	0	0	0
ENSG00000235101	0	0	0	0	0	0	0	0	0	0	0	0	0	0	0
ENSG00000228215	0	0	0	0	0	0	0	0	0	0	0	0.0123903	0	0	0
ENSG00000177807	0.0227408	0.00841217	0.0266435	0.0325511	0	0.0101946	0.0158815	0.00720298	0.0317593	0.0644807	0.0160109	0.0320738	0.0402996	0.0140546	0.0536013
ENSG00000163485	4.69283	7.05255	6.12087	4.83645	5.15255	4.99581	4.86861	4.74936	4.39426	10.0158	10.6048	10.082	7.28425	7.75747	7.95038
ENSG00000123838	0.019187	0	0	0	0	0	0	0	0	0	0.0202633	0	0.0170009	0	0.019382
ENSG00000000971	0	0.0395435	0.0278321	0.0459044	0.0582517	0.0399351	0.024885	0.0282162	0.0311026	2.91741	2.92273	2.72465	1.47341	1.72325	1.4938
ENSG00000233626	0.122777	0.136251	0	0	0	0.0825602	0	0	0	0.130548	0	0.148427	0.326364	0	0.24805
ENSG00000185495	2.88776	1.2214	1.45547	1.60973	1.04943	1.06985	1.51825	1.05619	1.55231	1.58741	1.33498	1.98266	1.68973	1.68707	1.72825
ENSG00000233691	0	0	0	0	0	0	0	0	0	0	0	0	0	0	0
ENSG00000283518	0	0	0.0267719	0	0.0203756	0	0	0	0	0.0485937	0.0482644	0	0.0404939	0	0
ENSG00000118200	6.76418	3.96966	4.76928	5.68895	3.44505	4.9255	3.57484	2.51309	4.12335	7.78198	7.3238	8.42782	8.0615	7.70563	7.73783
ENSG00000271527	0	0.0983045	0	0	0	0	0	0	0	0	0	0.0535448	0	0	0
ENSG00000143228	3.58047	1.81463	2.59293	11.9249	7.35321	11.6686	1.6834	1.46002	2.76105	13.8495	12.1627	15.2264	16.0749	16.6225	16.8312
ENSG00000235827	0	0	0	0	0	0	0	0	0	0	0	0	0	0	0
ENSG00000231615	0	0	0	0	0.0316073	0.0238356	0	0	0	0	0	0	0	0.0328605	0.0358067
ENSG00000231714	0	0	0	0	0	0	0	0	0	0	0	0	0	0	0
ENSG00000174514	0.130962	0.090834	0.163027	0.126534	0.0510903	0.0880642	0.0600205	0.0622218	0.0857336	0.0957355	0.259328	0.188008	0.101535	0.128996	0.0909516
ENSG00000143178	1.04486	1.24235	1.32619	0.51278	0.676587	0.560412	1.51152	1.33562	1.28985	0.79357	0.761919	0.556388	0.837638	0.611163	0.590567
ENSG00000162409	0	0.0112354	0	0.0173903	0	0	0	0.00481019	0.00530226	0.0645909	0.133653	0.0856763	0.0852222	0.107936	0.0971586
ENSG00000224837	3.99472	1.41054	2.34013	4.67838	4.12875	4.57877	2.09234	3.53707	3.04305	5.69561	5.94466	4.60978	5.47024	5.04995	5.13587
ENSG00000231547	0	0	0	0	0	0	0	0	0	0	0	0	0	0	0
ENSG00000116833	0.169638	0.17431	0.191389	0.291383	0.184879	0.223918	0.27643	0.250747	0.28956	0.347391	0.192424	0.258247	0.222681	0.250455	0.260217
ENSG00000272205	0.347448	0.616926	0.16283	0.895203	0.433743	0.700914	0.509559	0.660308	0.509499	1.03443	0.660487	1.1341	1.16987	0.773042	0.772155
ENSG00000227740	0	0	0	0.03389	0.0351865	0.0265347	0	0.0374963	0	0.0839162	0	0	0.0349643	0.0365816	0.0398615
ENSG00000135824	0	0	0	0	0	0	0	0	0	0	0	0	0	0	0
ENSG00000260990	0	0	0	0	0	0	0	0	0	0	0	0	0	0	0
ENSG00000000457	1.68691	1.38302	1.54079	1.36599	1.16653	1.26862	1.34879	1.2431	1.40633	1.47888	1.46886	1.46916	1.36659	1.34044	1.3702
ENSG00000286185	0	0	0	0	0	0.00220923	0	0	0	0	0	0	0	0	0
ENSG00000143507	7.92939	8.37171	8.17064	8.2786	8.0721	7.86842	10.2206	9.79671	10.834	6.55966	6.63914	6.74869	7.81318	7.44416	7.70516
ENSG00000285638	0	0	0	0	0	0	0	0	0	0	0	0	0	0	0
ENSG00000226520	0.242207	0.358384	0.283773	0.0693388	0.287966	0.10858	0.16915	0.230152	0.0845652	0.515077	0.0852644	0.439214	0.429221	0.449075	0.326226
ENSG00000198483	0	0	0.0330211	0	0.0125658	0.00947613	0.0295246	0.0267814	0.0738028	0	0.0595305	0.0170363	0	0	0.0142354
ENSG00000143367	16.5713	16.8303	16.7377	8.12359	8.35808	7.64246	12.8787	13.784	13.3764	14.9434	14.1581	14.7369	14.9322	15.6456	14.3448
ENSG00000260021	0	0	0	0	0	0	0	0	0	0	0.169089	0	0.0709327	0	0.0808676
ENSG00000284592	0	0	0	0	0	0	0	0	0	0	0	0	0	0	0
ENSG00000230987	0	0.0149073	0.0157384	0	0	0.00903294	0	0	0.0140702	0	0	0.032479	0	0.0124531	0
ENSG00000232527	0.0539771	0	0.0632403	0	0.0962619	0	0	0.0512904	0	0	0	0.032627	0	0	0
ENSG00000275392	0	0	0	0	0	0	0	0	0	0	0	0	0	0	0
ENSG00000215833	0	0	0	0	0	0	0	0	0	0	0.0325001	0	0	0	0
ENSG00000229291	0.498862	0.55361	0.876711	0.428441	0	0.503182	1.30646	0.237016	0.783786	1.85654	1.84396	1.35694	1.10506	2.08111	1.76376
ENSG00000228167	0	0	0	0	0	0	0	0	0	0	0	0	0	0	0
ENSG00000225325	0	0	0	0	0	0	0	0	0	0	0	0	0	0	0
ENSG00000223344	0	0	0	0	0	0	0	0	0	0	0	0	0	0	0
ENSG00000276110	0.0663752	0	0	0	0	0.0446334	0	0	0	0	0	0	0	0	0.0670499
ENSG00000197959	0.372308	0.190335	0.235255	0.143709	0.134286	0.115332	0.276076	0.174901	0.254136	0.24909	0.242984	0.285732	0.300235	0.341269	0.333835
ENSG00000228191	0	0	0	0	0	0	0	0	0	0	0	0	0	0	0
ENSG00000234775	0	0.0172379	0.0363979	0.026681	0.0277017	0.0208903	0.0162719	0.0147601	0	0.0495494	0.0492136	0.0187784	0.0137634	0.0288001	0
ENSG00000133063	0.018388	0.0272079	0.0143624	0	0.00546546	0.0041216	0.0256832	0.0174727	0.0128401	0.0195519	0.0194194	0.0185246	0.0108619	0.0227287	0.0247665
ENSG00000229961	0	0	0	0	0	0	0	0.00774162	0	0	0	0	0	0	0
ENSG00000180999	0.0274259	0	0.0321325	0	0.0244554	0.0553268	0.0574601	0.0260608	0.0287267	0.0874856	0.0289643	0.0331556	0.072903	0	0
ENSG00000150732	0	0	0	0	0	0	0	0	0	0	0	0	0	0	0
ENSG00000234277	0	0	0	0	0	0	0	0	0	0	0	0	0	0	0
ENSG00000203784	0	0	0	0	0	0	0	0	0	0	0	0	0	0	0
ENSG00000157064	1.22183	1.06807	1.10362	0.826583	0.791252	0.853736	0.879505	0.972915	1.07959	3.17897	3.20068	3.4658	2.30434	2.75896	2.63398
ENSG00000288139	0	0	0	0	0	0.163427	0	0	0	0.258419	0	0	0	0	0
ENSG00000203666	1.05169	1.08767	1.01283	1.04036	0.89359	0.933054	1.15361	1.03073	1.18231	0.895774	0.866444	0.978513	1.13189	1.11789	1.19587
ENSG00000226015	1.37285	1.58699	1.94354	2.18616	2.24429	1.61553	1.91751	1.73936	1.67763	2.82826	2.47684	2.61051	2.40752	1.69693	1.70461
ENSG00000215808	0.01589	0	0.0186169	0.00682345	0.00708448	0	0	0	0.00832184	0.0168958	0	0.0240121	0.028159	0.0147308	0.0401288
ENSG00000059588	6.60056	4.74877	5.32597	5.6636	4.82095	5.27401	4.23502	3.45566	4.01867	6.30299	6.33069	6.31622	6.42315	5.98418	5.77986
ENSG00000265972	189.436	181.697	171.274	136.686	128.712	137.668	153.91	136.511	162.638	120.261	116.835	125.428	112.006	115.761	117.413
ENSG00000231512	0	0	0	0	0	0	0	0	0	0	0	0	0	0	0
ENSG00000143162	38.2626	41.4853	39.9118	20.1528	18.1073	19.8037	55.0392	50.967	60.6524	12.6823	13.4341	14.7678	14.3765	10.9636	10.7373
ENSG00000237379	0	0	0.105361	0	0	0	0	0	0	0	0	0	0	0	0
ENSG00000275131	1.63593	1.5593	1.61683	0.849034	0.487741	0.762624	2.08171	1.4353	1.37713	0.69366	0.535268	0.467128	0.564697	0.702469	0.800935
ENSG00000287452	0	0	0	0	0	0	0	0	0	0	0	0	0	0	0
ENSG00000232959	0	0	0	0	0	0	0	0	0	0	0	0	0	0	0
ENSG00000233791	0.0347831	0	0	0.0149365	0.0155079	0.0116948	0	0	0	0.0184924	0	0.0420499	0.01541	0	0.0175683
ENSG00000159166	0.217994	0.161278	0.17027	0.187221	0.272137	0.244313	0.0608961	0.0690478	0.0152222	1.09715	1.05902	1.37039	1.33922	1.37422	1.42402
ENSG00000117153	11.8345	12.4286	11.3488	10.6628	11.3598	10.8468	12.284	10.9116	10.7826	16.2322	16.75	16.5689	15.7052	15.342	15.2027
ENSG00000122224	0.00519762	0.00576803	0	0.00446391	0	0	0	0	0	0.0497396	0.0494025	0.0722603	0.0184216	0.0144553	0.0157514
ENSG00000243781	0	0	0	0	0	0	0	0	0	0	0	0	0	0	0
ENSG00000131779	20.165	20.8168	19.1009	17.2948	16.7511	18.4569	20.1125	18.4536	25.2533	13.3459	13.4011	13.8063	13.5411	14.4488	14.9361
ENSG00000228288	1.11824	1.77279	1.87163	1.14331	1.28201	1.28905	2.17548	2.88414	3.45805	1.24564	0.899779	1.09436	0.943643	0.592376	0.753068
ENSG00000162782	0	0	0	0	0	0	0	0	0	0	0.0122372	0	0	0	0.011705
ENSG00000238051	0	0	0	0	0	0	0	0	0	0	0	0	0	0	0
ENSG00000162704	8.99779	8.27166	7.84128	11.7634	10.2691	11.4426	6.84316	7.03614	7.82584	13.5797	13.1164	13.9924	13.5479	13.366	13.5619
ENSG00000233196	0.140006	0.0776853	0	0	0.0624209	0.0470727	0.0733317	0	0.146646	0	0	0.0423139	0.124054	0.0648959	0.0707143
ENSG00000229220	0	0	0	0	0	0	0.0662825	0	0.0662747	0	0	0	0	0	0
ENSG00000279061	0	0	0	0	0	0	0	0	0	0	0	0	0	0	0
ENSG00000143653	20.3646	17.49	19.1394	20.2274	17.9221	21.2256	16.0693	15.1863	19.893	22.5245	21.3199	22.8128	23.5752	24.0091	25.5803
ENSG00000135837	3.50263	1.83288	2.22318	3.07383	1.80758	2.42012	1.57003	1.16522	1.71952	4.11303	3.64997	4.13597	3.79552	3.46276	3.84708
ENSG00000117595	7.35047	7.92438	7.58428	2.40723	2.02326	2.03223	9.5576	8.67866	8.79755	2.63566	2.51711	2.52407	1.98514	1.74996	1.90685
ENSG00000230280	0.516252	0.630198	0.241939	0.266025	0.36827	0.173574	0.216321	0.196222	0.378517	0.713608	0.763293	0.499285	0.548917	0.717885	0.521499
ENSG00000228560	0	0	0	0	0	0	0	0	0	0	0.0470839	0	0	0	0
ENSG00000158711	2.70955	1.33305	1.75807	2.3304	1.48016	1.86907	0.956994	0.853303	1.35185	3.31921	2.64805	3.33437	2.62817	2.5227	2.61143
ENSG00000227747	0	0	0	0	0	0	0	0	0	0	0	0	0	0	0
ENSG00000228081	0	0	0	0	0	0	0	0	0	0	0	0	0	0	0
ENSG00000228020	0	0	0	0	0	0	0	0	0	0	0	0	0	0	0
ENSG00000234975	27.4919	25.0199	25.3367	22.3268	17.0267	19.2602	32.0527	28.7468	45.0613	17.7349	21.1377	18.5646	17.5307	20.581	18.3593
ENSG00000163444	10.3633	9.7814	9.72169	11.0776	10.9781	11.483	9.45454	8.85493	10.4738	12.9162	13.2748	13.6351	11.4288	11.631	11.9862
ENSG00000162851	15.9124	9.1389	10.9556	15.8792	12.4598	14.9516	5.92741	5.50291	10.6848	19.3771	18.32	19.9433	18.3598	20.2188	20.1531
ENSG00000271427	0.164841	0.182932	0.289696	0.283144	0.146988	0.055423	0.0863401	0.156637	0.34532	0.262913	0.0870439	0.19928	0.14606	0.38204	0.249775
ENSG00000261817	0	0	0.109733	0	0	0	0	0	0	0.0995883	0	0	0	0	0
ENSG00000143353	5.28546	3.05794	3.49273	3.63978	2.14097	3.5975	3.05537	3.39929	6.6839	4.0094	3.74398	4.83123	4.45479	4.46665	5.32291
ENSG00000197965	10.2708	8.20625	9.22144	11.6653	9.43339	11.1171	7.76041	7.6	8.75665	13.7438	13.5657	13.4256	13.4489	13.319	13.2264
ENSG00000143493	5.73935	5.25337	5.34817	6.90847	6.50626	6.85711	4.52086	3.5766	4.76266	10.7861	10.6096	11.1875	9.88699	9.94013	9.86056
ENSG00000230777	0.831437	1.23024	0.649415	0.238023	0.494257	0.745455	1.74195	1.84346	0.870873	0.589377	0.585383	0.837616	0.736704	1.02771	0.559925
ENSG00000179397	0.31017	0.118693	0.325807	0.202086	0.219354	0.100689	0.268899	0.182937	0.257665	0.147843	0.0790683	0.11637	0.104246	0.0892374	0.172868
ENSG00000224540	0	0	0.0453636	0	0	0	0	0	0	0	0	0	0	0	0
ENSG00000117592	83.3204	74.7589	80.2962	86.7755	86.9865	89.6061	67.7551	72.2555	80.0766	104.599	99.624	102.041	89.7262	88.0022	85.1823
ENSG00000152904	3.62065	1.50502	2.34695	5.06503	3.18412	5.27093	1.45978	1.22957	3.02348	3.63815	2.93022	3.60995	3.48373	4.17545	3.92139
ENSG00000186197	0	0	0	0	0	0	0	0	0	0	0	0.00716879	0	0	0
ENSG00000229067	0.313854	0	0.367715	0.269549	0	0.422096	0	0	0	0.33372	0	0	0	0.290957	0.634088
ENSG00000271554	0.0719149	0	0	0	0.0641259	0.0967169	0.0753347	0.0683354	0.0753259	0.152934	0.227846	0	0	0	0.0726458
ENSG00000230231	0	0.0684804	0	0	0	0	0.0646427	0	0	0.0656142	0	0	0.0546773	0	0
ENSG00000271269	0	0	0	0	0	0	0	0	0	0	0	0	0	0	0
ENSG00000227711	0.0613885	0.0681255	0	0	0.0547396	0.0412801	0	0	0.0643002	0	0.0648319	0	0	0	0
ENSG00000261182	0	0	0	0	0	0	0	0	0	0	0	0	0	0	0
ENSG00000094963	0.0229279	0.00848136	0.0268626	0	0.00681486	0	0.0160121	0.00726221	0.0160102	0.0243792	0.0242139	0.00923931	0	0.00708507	0
ENSG00000228606	1.41417	1.56937	1.73768	0.947934	0.738148	0.788588	1.15623	1.27823	0.722558	1.21028	1.05637	0.729714	0.794611	0.639513	0.522638
ENSG00000228879	0.29436	0.163332	0	0	0	0	0.154179	0.139854	0	0	0.155435	0.177928	0.13041	0	0
ENSG00000227925	1.09945	0.706376	0.406777	0.198788	0.103196	0.3502	0.545556	0.329912	0.606102	0.36917	0.672225	0.559638	0.358907	0.160932	0.409176
ENSG00000162670	0	0	0	0	0.00988976	0	0	0	0	0	0	0	0	0	0.0112037
ENSG00000225712	0	0	0	0	0	0	0	0	0	0	0	0	0	0	0
ENSG00000226565	0	0	0	0	0	0.413873	0.644748	0	0	0	0	0	0	0	0.621735
ENSG00000159176	9.63639	10.7602	10.117	12.493	12.9013	12.5459	8.35285	8.35803	8.35187	15.7553	16.5217	15.7697	13.6582	12.6932	12.6481
ENSG00000162761	0	0	0	0	0	0	0	0	0	0	0	0	0	0	0
ENSG00000143199	0.108042	0.0685138	0.0271251	0.0331395	0.0412887	0.0518942	0.0808428	0.153997	0.12125	0.0574405	0.0570512	0.0746367	0.054704	0.0786973	0.0623659
ENSG00000236523	0	0	0	0	0	0	0	0	0	0	0	0	0	0	0
ENSG00000223353	0	0	0	0	0	0	0	0	0	0	0	0	0	0	0
ENSG00000117479	2.44344	1.62696	1.80673	2.30371	1.98513	1.89135	1.33101	1.44469	1.72897	3.54497	3.23423	3.35434	2.8771	3.32227	3.28007
ENSG00000179930	0	0	0	0	0	0.00873341	0	0	0	0.0276195	0	0.015701	0.0115078	0	0.0131197
ENSG00000007908	0	0	0	0	0.00921477	0	0	0	0	0	0	0.00624651	0	0	0
ENSG00000092978	1.70999	0.945852	1.14931	1.77245	1.22843	1.59323	0.909691	0.692737	1.10049	1.90942	1.7493	2.05104	1.82389	1.93807	2.01978
ENSG00000143499	7.53191	6.30383	6.80292	9.4491	8.31522	9.78405	5.43268	5.16742	6.49815	10.7194	9.83806	10.4941	9.93759	10.1996	10.3992
ENSG00000278467	2.89479	1.46856	1.64734	1.49169	0.442502	1.22356	0.953056	0.628733	0.346525	1.67093	1.48491	1.44982	1.46569	0.99677	1.83808
ENSG00000163518	0	0	0	0	0	0	0	0	0	0	0.0128929	0	0	0	0
ENSG00000243155	0.0782045	0.108484	0.0916254	0.0335824	0.0348671	0.0788817	0.0409617	0.0743119	0.26622	0.0831546	0.0619434	0.0945428	0.155911	0.0906241	0.0987492
ENSG00000188404	0.0867666	0.077031	0.0203314	0.089422	0.0618952	0.0583453	0.0363571	0.0164896	0.0727056	0.147614	0.183267	0.125872	0.169137	0.193048	0.122708
ENSG00000233693	0.0724278	0.0535842	0	0	0	0.0162344	0	0.0229409	0.0505754	0	0	0.0145932	0.0641754	0.0447627	0
ENSG00000227735	0	0	0	0	0	0	0	0	0	0	0	0	0	0	0
ENSG00000232864	0	0	0	0	0.0601123	0	0	0	0	0	0	0	0	0	0.068099
ENSG00000243062	0	0	0	0	0	0	0	0	0	0	0	0	0	0	0
ENSG00000143196	0	0	0	0	0	0	0	0	0	0	0	0	0	0.0255582	0
ENSG00000283174	0	0	0	0	0	0	0	0	0	0	0	0	0	0	0
ENSG00000228504	0	0	0	0	0	0	0	0	0	0	0	0	0	0	0
ENSG00000237463	0	0	0	0	0	0	0	0.0103572	0	0	0	0	0	0	0
ENSG00000274702	0	0	0	0	0	0	0	0	0	0	0	0	0	0	0
ENSG00000224462	0.0250353	0.0555657	0.0586635	0	0.0223238	0	0.0524517	0.0475784	0.0524456	0.23958	0.290836	0.363188	0.15528	0.162463	0.151739
ENSG00000226211	0	0	0	0	0	0	0	0	0	0	0	0	0	0	0
ENSG00000236942	0.268509	0.297977	0	0	0.359141	0	0	0.127572	0	0.142753	0.141785	0.0811515	0.475832	0.248921	0
ENSG00000287205	0.348836	0.331816	0.583859	0.0855981	0.0888727	0.167551	0.104407	0.189413	0.20879	0	0.0526291	0.0903674	0.176623	0.184793	0.100681
ENSG00000238005	0.154497	0.200027	0.181011	0.165859	0.126283	0.112547	0.188818	0.159041	0.161825	0.164276	0.190357	0.101169	0.20534	0.119355	0.0910392
ENSG00000203697	1.02588	0.731869	0.772671	0.676529	0.236859	0.468107	0.623688	0.713704	0.508486	1.99658	1.90566	2.04301	0.446379	0.288708	0.434878
ENSG00000116574	9.0959	7.77287	7.73009	4.35249	3.92214	4.11514	8.4266	8.59772	9.92795	4.63883	4.75887	4.99236	4.64932	4.39899	4.1414
ENSG00000287929	0.254248	0.16929	0.357457	0.131015	0.362738	0.20516	0.372874	0.193275	0.426092	0.216273	0.429616	0.614731	0.180224	0.2357	0.205466
ENSG00000186283	3.23394	2.78951	3.10003	6.57745	6.69799	6.99836	2.14043	1.73204	2.06319	12.5198	12.9162	12.5284	11.0842	11.9512	12.2654
ENSG00000159346	27.4334	26.4401	26.1126	28.0324	27.15	28.0907	26.1544	25.822	26.1992	30.9181	31.7376	31.7292	30.7286	30.4423	32.0336
ENSG00000160856	0	0	0	0	0	0.00494081	0	0	0	0.0156253	0	0.0177653	0.0195312	0	0
ENSG00000224896	0	0	0	0	0	0	0	0	0	0	0	0	0	0	0
ENSG00000226292	0	0	0	0	0	0	0	0	0	0	0	0	0	0	0
ENSG00000121481	2.47515	1.91198	1.97593	2.4592	2.14216	2.39868	1.83025	1.48726	2.13504	3.61231	3.48532	3.57164	2.87043	2.77825	3.07636
ENSG00000227940	0	0	0	0	0	0	0	0	0	0	0	0	0	0	0
ENSG00000227181	0	0	0	0	0	0	0	0	0	0	0	0	0	0	0
ENSG00000117139	4.07891	3.11134	3.5368	3.5211	2.74779	3.12807	3.17425	2.59357	3.35331	3.05601	3.02726	3.10177	2.88391	2.72617	2.8956
ENSG00000143248	0.515129	0.269952	0.251472	0.276507	0.19139	0.298283	0.35975	0.312729	0.55455	0.448839	0.536468	0.523283	0.557866	0.636733	0.650457
ENSG00000230623	0.0581781	0.0129126	0.0817948	0.0199862	0.0103754	0.0391213	0.0243779	0.0110565	0.0121875	0.0618607	0.0368649	0.0421996	0.0206198	0.0755074	0.0587695
ENSG00000278455	0.0257845	0.0286142	0	0	0.0229918	0	0.0540213	0	0	0	0	0.0155857	0	0	0.0260466
ENSG00000132704	0	0	0	0	0	0	0	0	0	0	0	0	0	0.0173723	0
ENSG00000258082	0.0560188	0.124333	0	0	0.0499515	0.0376693	0.234731	0.106461	0	0.0595647	0.177483	0.0338611	0.0992722	0.0519321	0.113176
ENSG00000224810	0	0	0	0	0	0	0	0	0	0	0.0609625	0.0232615	0	0	0.0194371
ENSG00000162814	0.443731	0.330976	0.272725	0.393587	0.337293	0.332623	0.259087	0.172805	0.274295	0.224307	0.253516	0.360554	0.3545	0.310206	0.308625
ENSG00000231768	0	0	0	0	0	0	0	0.0138819	0.030604	0	0	0	0	0	0
ENSG00000163435	9.80682	10.3707	10.1685	3.87988	3.95773	3.70746	12.0901	12.1575	11.4256	3.06446	3.08548	2.65496	2.58287	2.43334	2.33172
ENSG00000225172	0	0	0	0	0	0	0	0	0	0	0	0	0	0	0
ENSG00000261642	0	0	0	0	0	0	0	0	0	0	0	0	0	0	0
ENSG00000228239	0	0	0	0	0	0	0	0	0	0	0	0	0	0	0
ENSG00000237283	0	0	0	0	0	0	0	0	0	0	0	0	0	0	0
ENSG00000116132	0.0459669	0.057388	0.0471236	0.133239	0.0819766	0.0695475	0.0662101	0.0272993	0.0361104	0.0794244	0.0667498	0.107667	0.122189	0.111861	0.197345
ENSG00000282221	0	0	0	0	0	0.0573169	0	0	0	0.0906326	0	0.0515224	0.0755254	0.079019	0
ENSG00000238042	4.17885	4.11047	3.11563	1.54977	1.05859	1.6924	5.27298	3.56474	3.43201	2.42365	2.15647	1.72223	2.44042	1.84895	1.48706
ENSG00000242757	0	0	0	0	0	0	0	0	0	0	0	0	0	0	0
ENSG00000271475	0	0	0	0	0	0	0	0	0	0	0	0	0	0	0
ENSG00000231877	0	0.0181355	0	0	0	0	0.0171192	0	0	0	0	0	0.0289601	0	0.0165081
ENSG00000116679	8.15649	6.31275	6.89038	5.7023	4.77715	5.44022	7.19492	6.48068	7.44628	8.47436	7.55235	8.16496	8.41656	7.57819	8.40357
ENSG00000228536	0.200459	0.111229	0.0587152	0.0430404	0	0.0336992	0.052498	0.0476204	0.0874864	0.053287	0.017642	0.0908771	0.0148016	0.0774313	0.0168747
ENSG00000230550	0.0308541	0	0	0.0264986	0	0.0207475	0	0	0.0323176	0.0984213	0	0	0.0273386	0.0286032	0.0623354
ENSG00000243636	0.0501502	0	0	0	0	0.033723	0	0	0	0.0533246	0.15889	0.0303137	0.0444361	0.0929832	0.0506599
ENSG00000224671	0.537019	0.446965	0.157295	0.345908	0.239428	0.0902782	0.562556	0.255144	0.281245	0.285505	0.283571	0.243455	0.237916	0.248921	0.135619
ENSG00000227002	0	0	0	0	0	0	0	0	0	0	0	0	0	0	0
ENSG00000162706	0.0123192	0	0	0	0	0	0	0	0	0	0	0	0	0	0
ENSG00000229242	0	0	0	0	0	0	0	0	0	0	0	0	0	0	0
ENSG00000253326	0.152508	0	0.0893403	0.0654898	0.0339976	0.0256382	0	0.0362293	0.0399354	0	0	0	0	0.0706911	0
ENSG00000235449	0	0.55361	0.292237	0.642662	0	0.335455	0.261292	0.948063	0.261262	0.530439	0	0.452313	0	0.924938	0
ENSG00000272755	0	0	0.196549	0.288155	0.0747946	0.225616	0	0	0.087858	0	0	0.152105	0.148645	0	0
ENSG00000228470	0.18298	0.101531	0	0.3143	0.244743	0.0615217	0.0958409	0.0869363	0.0958296	0.194563	0.289866	0.608323	0.243198	0.59371	0.27726
ENSG00000021852	0	0	0	0	0	0	0	0	0	0	0	0	0	0	0
ENSG00000152092	0	0	0	0	0.00459286	0.00692712	0	0	0	0	0	0	0.00456387	0	0
ENSG00000234984	0	0	0	0	0	0	0	0	0	0	0	0	0	0	0
ENSG00000231648	0	0	0	0	0	0	0	0.0169043	0	0	0	0	0	0	0
ENSG00000233540	0	0	0	0	0.106715	0	0	0	0	0.127252	0	0	0.106041	0	0
ENSG00000286383	0	0	0	0	0	0	0	0	0	0	0	0.0369156	0	0	0
ENSG00000280587	0.682839	0.693285	0.76598	0.449193	0.375693	0.42009	0.639213	0.62124	0.365222	0.370754	0.567706	0.465439	0.347574	0.404058	0.337552
ENSG00000249007	0.62421	0.426285	0.225025	0.123714	0.0856311	0.290592	0.452695	0.365009	0.553229	0.0510554	0.0507095	0.0870714	0	0	0
[truncated: 59,249 more rows]

## Sheet: Table S5B
gene id	gene name
ENSG00000006327	TNFRSF12A
ENSG00000035499	DEPDC1B
ENSG00000058866	DGKG
ENSG00000065328	MCM10
ENSG00000078237	TIGAR
ENSG00000091127	PUS7
ENSG00000091136	LAMB1
ENSG00000091409	ITGA6
ENSG00000092853	CLSPN
ENSG00000103044	HAS3
ENSG00000104549	SQLE
ENSG00000106366	SERPINE1
ENSG00000110092	CCND1
ENSG00000111252	SH2B3
ENSG00000117525	F3
ENSG00000124882	EREG
ENSG00000130164	LDLR
ENSG00000133816	MICAL2
ENSG00000137440	FGFBP1
ENSG00000137812	KNL1
ENSG00000142627	EPHA2
ENSG00000144063	MALL
ENSG00000144354	CDCA7
ENSG00000152413	HOMER1
ENSG00000159339	PADI4
ENSG00000163661	PTX3
ENSG00000164171	ITGA2
ENSG00000164574	GALNT10
ENSG00000165490	DDIAS
ENSG00000165732	DDX21
ENSG00000166068	SPRED1
ENSG00000167772	ANGPTL4
ENSG00000168685	IL7R
ENSG00000169429	CXCL8
ENSG00000171793	CTPS1
ENSG00000174371	EXO1
ENSG00000175592	FOSL1
ENSG00000178409	BEND3
ENSG00000179041	RRS1
ENSG00000179388	EGR3
ENSG00000181026	AEN
ENSG00000181649	PHLDA2
ENSG00000186871	ERCC6L
ENSG00000187678	SPRY4
ENSG00000188064	WNT7B
ENSG00000189057	FAM111B
ENSG00000196083	IL1RAP
ENSG00000198768	APCDD1L
ENSG00000231290	APCDD1L-DT
ENSG00000237686	SCIRT
ENSG00000240476	LINC00973
ENSG00000254827	SLC22A18AS
ENSG00000276043	UHRF1
ENSG00000120738	EGR1
ENSG00000120875	DUSP4
ENSG00000139318	DUSP6
ENSG00000109321	AREG
ENSG00000170345	FOS
ENSG00000171617	ENC1
ENSG00000198959	TGM2
ENSG00000108846	ABCC3
ENSG00000173227	SYT12
ENSG00000146592	CREB5
ENSG00000172927	MYEOV
ENSG00000198369	SPRED2
ENSG00000006468	ETV1
ENSG00000106785	TRIM14
ENSG00000213694	S1PR3
ENSG00000276600	RAB7B
ENSG00000118523	CCN2
ENSG00000244405	ETV5
ENSG00000069535	MAOB
ENSG00000087253	LPCAT2
ENSG00000166025	AMOTL1
ENSG00000158125	XDH
ENSG00000168878	SFTPB
ENSG00000103196	CRISPLD2
ENSG00000259207	ITGB3
ENSG00000122877	EGR2
ENSG00000169047	IRS1
ENSG00000168398	BDKRB2
ENSG00000039139	DNAH5
ENSG00000188158	NHS
ENSG00000173166	RAPH1
ENSG00000154874	CCDC144B
ENSG00000171004	HS6ST2
ENSG00000185988	PLK5
ENSG00000175556	LONRF3
ENSG00000102908	NFAT5
ENSG00000269821	KCNQ1OT1
ENSG00000102934	PLLP
ENSG00000173846	PLK3
ENSG00000174501	ANKRD36C
ENSG00000181143	MUC16
ENSG00000138018	SELENOI
ENSG00000140450	ARRDC4
ENSG00000142623	PADI1
ENSG00000158483	FAM86C1P
ENSG00000181722	ZBTB20
ENSG00000136155	SCEL
ENSG00000176438	SYNE3
ENSG00000203668	CHML
ENSG00000144426	NBEAL1
ENSG00000218226	TATDN2P2
ENSG00000165376	CLDN2
ENSG00000188167	TMPPE
ENSG00000183054	RGPD6
ENSG00000235865	GSN-AS1
ENSG00000151304	SRFBP1
ENSG00000007237	GAS7
ENSG00000215182	MUC5AC
ENSG00000131746	TNS4
ENSG00000240891	PLCXD2
ENSG00000154898	CCDC144CP
ENSG00000160229	ZNF66
ENSG00000138778	CENPE
ENSG00000197385	ZNF860
ENSG00000268521	VN1R83P
ENSG00000234367	PFN1P3
ENSG00000242082	SLC5A4-AS1
ENSG00000185774	KCNIP4
ENSG00000115112	TFCP2L1
ENSG00000240970	RPL23AP64
ENSG00000175920	DOK7
ENSG00000165449	SLC16A9
ENSG00000109667	SLC2A9
ENSG00000070731	ST6GALNAC2
ENSG00000087076	HSD17B14
ENSG00000090238	YPEL3
ENSG00000090539	CHRD
ENSG00000092068	SLC7A8
ENSG00000101197	BIRC7
ENSG00000102032	RENBP
ENSG00000104808	DHDH
ENSG00000117318	ID3
ENSG00000130876	SLC7A10
ENSG00000134216	CHIA
ENSG00000135253	KCP
ENSG00000135744	AGT
ENSG00000135929	CYP27A1
ENSG00000136235	GPNMB
ENSG00000141480	ARRB2
ENSG00000144476	ACKR3
ENSG00000153446	C16orf89
ENSG00000160282	FTCD
ENSG00000162009	SSTR5
ENSG00000162496	DHRS3
ENSG00000165269	AQP7
ENSG00000167311	ART5
ENSG00000168079	SCARA5
ENSG00000168427	KLHL30
ENSG00000168874	ATOH8
ENSG00000172346	CSDC2
ENSG00000172602	RND1
ENSG00000176046	NUPR1
ENSG00000178026	LRRC75B
ENSG00000179057	IGSF22
ENSG00000179178	TMEM125
ENSG00000182782	HCAR2
ENSG00000184160	ADRA2C
ENSG00000184730	APOBR
ENSG00000186191	BPIFB4
ENSG00000186301	MST1P2
ENSG00000186526	CYP4F8
ENSG00000188263	IL17REL
ENSG00000203985	LDLRAD1
ENSG00000204577	LILRB3
ENSG00000224940	PRRT4
ENSG00000231419	LINC00689
ENSG00000235169	SMIM1
ENSG00000244280	ECEL1P2
ENSG00000260284	TPSP2
ENSG00000260433	LINC01917
ENSG00000261089	CDC37P2
ENSG00000261713	SSTR5-AS1
ENSG00000268621	IGFL2-AS1
ENSG00000268879	IGFL1P1
ENSG00000269516	CYP4F23P
ENSG00000272899	ATP6V1FNB
ENSG00000283632	EXOC3L2
ENSG00000115738	ID2
ENSG00000214049	UCA1
ENSG00000178150	ZNF114
ENSG00000118785	SPP1
ENSG00000163395	IGFN1
ENSG00000211445	GPX3
ENSG00000103257	SLC7A5
ENSG00000124466	LYPD3
ENSG00000103154	NECAB2
ENSG00000167513	CDT1
ENSG00000167964	RAB26
ENSG00000206077	ZDHHC11B
ENSG00000158050	DUSP2
ENSG00000214274	ANG
ENSG00000102575	ACP5
ENSG00000130203	APOE
ENSG00000158022	TRIM63
ENSG00000130653	PNPLA7
ENSG00000152689	RASGRP3
ENSG00000105369	CD79A
ENSG00000223572	CKMT1A
ENSG00000184012	TMPRSS2
ENSG00000105707	HPN
ENSG00000126860	EVI2A
ENSG00000167612	ANKRD33
ENSG00000005961	ITGA2B
ENSG00000284713	SMIM38
ENSG00000176845	METRNL
ENSG00000197245	FAM110D
ENSG00000166793	YPEL4
ENSG00000125910	S1PR4
ENSG00000006638	TBXA2R
ENSG00000128242	GAL3ST1
ENSG00000124935	SCGB1D2
ENSG00000169071	ROR2
ENSG00000232553	CLK2P1
ENSG00000168913	ENHO
ENSG00000160460	SPTBN4
ENSG00000221826	PSG3
ENSG00000138944	SHISAL1
ENSG00000178573	MAF
ENSG00000241458	RPL7P19
ENSG00000133878	DUSP26
ENSG00000106018	VIPR2
ENSG00000006116	CACNG3
ENSG00000159224	GIP
ENSG00000206113	CFAP99
ENSG00000172250	SERHL
ENSG00000273356	LINC02019
ENSG00000139574	NPFF
ENSG00000159337	PLA2G4D
ENSG00000230798	FOXD3-AS1
ENSG00000170667	RASA4B

## Sheet: Table S5C
Gene name	Gene id	Ctrl-1	Ctrl-2	Ctrl-3	EGF-1	EGF-2	EGF-3
TNFRSF12A	ENSG00000006327	34.6821	44.796	41.1582	88.9521	111.173	95.8878
DEPDC1B	ENSG00000035499	1.71836	1.28511	1.12334	4.22419	3.0645	4.26194
DGKG	ENSG00000058866	0.379999	0.273148	0.232724	1.53536	1.50168	1.38797
MCM10	ENSG00000065328	0.486427	0.3663	0.346014	2.17087	1.90537	2.25461
TIGAR	ENSG00000078237	0.105382	0.10581	0.0940703	0.258589	0.161089	0.276704
PUS7	ENSG00000091127	5.14223	3.36936	3.97055	8.50213	6.80643	7.73521
LAMB1	ENSG00000091136	1.8761	2.10462	1.96213	4.63895	4.51411	4.30235
ITGA6	ENSG00000091409	12.3606	8.29959	9.12808	27.5571	20.3228	24.8638
CLSPN	ENSG00000092853	0.296477	0.208376	0.1621	1.40893	1.03103	1.2726
HAS3	ENSG00000103044	6.00601	6.34149	6.53487	31.5596	31.5967	30.1768
SQLE	ENSG00000104549	7.76104	5.59525	5.98458	31.7862	23.0486	30.6542
SERPINE1	ENSG00000106366	8.3041	9.59871	8.3569	27.9729	25.2938	23.8507
CCND1	ENSG00000110092	19.988	18.8787	16.6307	70.196	64.316	63.4754
SH2B3	ENSG00000111252	8.65295	7.44613	7.6764	24.5124	21.2072	22.6378
F3	ENSG00000117525	2.36467	1.94991	2.03938	6.43107	4.77353	5.96287
EREG	ENSG00000124882	4.03988	2.87222	3.02263	8.2216	5.90279	7.09546
LDLR	ENSG00000130164	58.2544	77.8613	63.9681	225.126	251.308	216.283
MICAL2	ENSG00000133816	3.95715	4.0945	3.55556	10.1735	9.81759	9.28175
FGFBP1	ENSG00000137440	2.59586	2.84181	3.28794	17.5039	19.675	18.0217
KNL1	ENSG00000137812	1.06805	0.646508	0.557959	2.5255	1.65738	2.26964
EPHA2	ENSG00000142627	17.0181	21.2861	20.6627	34.431	40.4221	33.7845
MALL	ENSG00000144063	3.25221	4.65176	4.59357	11.9949	16.272	12.2589
CDCA7	ENSG00000144354	2.9635	1.81816	1.94775	4.65578	3.85637	4.504
HOMER1	ENSG00000152413	0.874303	0.441812	0.58534	1.45484	0.932746	1.34381
PADI4	ENSG00000159339	3.81241	4.30161	4.09289	9.75421	10.6536	9.72887
PTX3	ENSG00000163661	5.78564	6.44849	7.48586	41.0908	37.6607	40.9348
ITGA2	ENSG00000164171	15.3772	9.79789	10.5481	40.14	26.1978	32.9499
GALNT10	ENSG00000164574	7.56753	6.69437	6.74489	13.0567	12.4289	13.3806
DDIAS	ENSG00000165490	0.967544	0.620594	0.800791	2.82832	2.27956	2.72781
DDX21	ENSG00000165732	19.2217	12.6591	13.1081	36.2413	26.0199	34.4059
SPRED1	ENSG00000166068	1.6633	0.855059	1.19647	3.29291	2.12658	2.8044
ANGPTL4	ENSG00000167772	2.62331	3.3787	2.96133	23.8456	27.0116	24.5675
IL7R	ENSG00000168685	4.29834	3.70422	3.54179	14.2524	11.6809	12.8214
CXCL8	ENSG00000169429	2.24365	1.03354	1.11596	6.39887	5.07711	6.30532
CTPS1	ENSG00000171793	1.46879	1.38973	1.43239	4.15623	4.05404	4.15337
EXO1	ENSG00000174371	1.32885	1.23314	0.966353	5.57843	4.96443	5.46929
FOSL1	ENSG00000175592	5.44994	7.27438	6.88545	27.6523	31.5095	31.1589
BEND3	ENSG00000178409	0.367898	0.371157	0.454545	1.03406	0.942402	0.791645
RRS1	ENSG00000179041	10.1948	12.5673	10.4594	18.7418	22.2842	20.6958
EGR3	ENSG00000179388	0.517893	0.501582	0.419223	1.47992	1.36861	1.70327
AEN	ENSG00000181026	1.18163	1.42571	1.14283	4.21594	4.45501	4.2395
PHLDA2	ENSG00000181649	38.1711	43.332	42.6094	159.622	187.18	175.483
ERCC6L	ENSG00000186871	1.44009	0.738529	1.07369	4.81602	3.64805	4.65112
SPRY4	ENSG00000187678	2.49431	2.26258	2.15154	9.33877	8.90952	8.61487
WNT7B	ENSG00000188064	8.63876	10.1873	9.79339	20.2788	20.9714	18.87
FAM111B	ENSG00000189057	0.895112	0.557907	0.58901	4.39138	3.45507	4.19688
IL1RAP	ENSG00000196083	3.20648	2.31613	2.31554	6.83178	4.91035	6.24516
APCDD1L	ENSG00000198768	2.96059	3.13559	3.4291	8.73979	8.92357	8.57641
APCDD1L-DT	ENSG00000231290	4.08691	3.45909	3.77338	9.90046	8.78717	8.69269
SCIRT	ENSG00000237686	0.294868	0.436305	0.287893	1.53353	1.94277	1.78453
LINC00973	ENSG00000240476	3.25142	3.44423	3.23222	17.5162	22.7109	20.0419
SLC22A18AS	ENSG00000254827	1.33888	1.69076	1.46047	3.21174	4.15797	3.35292
UHRF1	ENSG00000276043	7.6085	9.70081	8.74155	27.5301	31.5977	27.5386
EGR1	ENSG00000120738	12.3881	14.8541	13.7883	16.4001	19.1829	16.2846
DUSP4	ENSG00000120875	10.2825	8.95952	9.79494	14.6455	13.6021	14.1004
DUSP6	ENSG00000139318	2.2474	2.08518	2.14388	13.9646	12.9219	13.4938
AREG	ENSG00000109321	4.47366	3.71546	4.76798	23.152	22.0045	24.0467
FOS	ENSG00000170345	2.33538	2.82278	2.84073	3.10438	3.26293	3.38087
ENC1	ENSG00000171617	8.10847	7.57587	6.75793	11.5982	10.7102	11.1358
TGM2	ENSG00000198959	17.3099	20.7248	17.9052	42.7605	46.2307	41.0221
ABCC3	ENSG00000108846	14.9939	16.1471	16.054	13.089	13.7391	12.0347
SYT12	ENSG00000173227	15.0018	16.7101	17.35	9.98286	11.3178	10.4544
CREB5	ENSG00000146592	3.55815	2.70596	2.45278	5.2441	3.92888	4.12233
MYEOV	ENSG00000172927	1.2648	1.6001	1.52631	5.09453	5.7631	5.17104
SPRED2	ENSG00000198369	5.31168	4.3087	4.37745	8.48049	6.90882	7.47355
ETV1	ENSG00000006468	4.98317	3.40774	3.70167	7.70013	5.77517	6.80121
TRIM14	ENSG00000106785	9.54583	7.42691	7.92201	14.6589	12.3593	13.5532
S1PR3	ENSG00000213694	3.43109	3.31249	3.48095	4.87163	4.25612	4.19808
RAB7B	ENSG00000276600	7.30293	7.02	6.88414	6.50391	7.03934	6.75233
CCN2	ENSG00000118523	15.2432	18.2208	14.4394	22.057	24.7083	22.7221
ETV5	ENSG00000244405	5.91065	4.78283	5.35725	10.1385	9.27457	9.6659
MAOB	ENSG00000069535	10.6243	10.5367	10.4721	16.9978	18.0276	17.9541
LPCAT2	ENSG00000087253	7.57137	4.82274	5.74787	4.51199	3.20918	4.1475
AMOTL1	ENSG00000166025	4.81007	4.49898	3.94709	7.79139	6.79598	6.95191
XDH	ENSG00000158125	0.719007	0.424976	0.805772	2.75865	2.45303	2.43321
SFTPB	ENSG00000168878	0.899409	1.26684	1.12131	1.18838	0.945943	0.736613
CRISPLD2	ENSG00000103196	2.20829	2.05431	1.91778	3.69599	3.503	3.6303
ITGB3	ENSG00000259207	2.97508	2.5301	2.57482	3.38326	2.7395	2.94555
EGR2	ENSG00000122877	0.560298	0.505203	0.574397	0.641606	0.718194	0.635795
IRS1	ENSG00000169047	4.39436	4.55116	4.31165	7.92182	7.11978	6.84504
BDKRB2	ENSG00000168398	3.14331	3.58815	3.22848	5.31592	5.05626	4.74881
DNAH5	ENSG00000039139	0.65038	0.395801	0.460325	0.6503	0.397963	0.521988
NHS	ENSG00000188158	5.44288	4.20188	3.94963	5.35713	3.36033	3.90321
RAPH1	ENSG00000173166	1.2845	0.819077	0.855186	1.67753	0.970843	1.0886
CCDC144B	ENSG00000154874	2.85309	1.40779	1.31241	1.36084	0.525035	0.756468
HS6ST2	ENSG00000171004	3.38243	2.54448	2.29782	4.40218	4.02989	4.05839
PLK5	ENSG00000185988	12.5758	12.9496	12.9027	19.9103	21.055	16.9852
LONRF3	ENSG00000175556	1.82953	1.27545	1.53893	2.75979	2.31112	2.42107
NFAT5	ENSG00000102908	10.1511	5.32631	5.74513	6.40023	3.10997	4.08432
KCNQ1OT1	ENSG00000269821	0.237303	0.135402	0.147191	0.142086	0.0843639	0.104643
PLLP	ENSG00000102934	0.936405	0.851878	1.02056	0.54238	0.747602	0.790757
PLK3	ENSG00000173846	2.79195	3.46193	3.62156	4.79565	4.81399	4.80849
ANKRD36C	ENSG00000174501	2.12252	0.76675	0.990824	1.42889	0.527374	0.799121
MUC16	ENSG00000181143	6.40759	5.0433	4.89502	1.49788	0.895701	0.887773
SELENOI	ENSG00000138018	4.73808	2.53986	3.03855	6.51078	4.40774	5.91008
ARRDC4	ENSG00000140450	1.43506	1.23002	1.3396	2.17438	1.86222	2.01628
PADI1	ENSG00000142623	1.59487	1.609	1.71003	1.49426	2.18061	1.70943
FAM86C1P	ENSG00000158483	1.55959	1.40331	1.36631	1.89451	1.82918	1.63451
ZBTB20	ENSG00000181722	0.657398	0.297404	0.239392	0.281027	0.133346	0.116489
SCEL	ENSG00000136155	0.642411	0.36271	0.435749	0.203268	0.200994	0.295567
SYNE3	ENSG00000176438	0.195093	0.170316	0.149335	0.301595	0.273701	0.285116
CHML	ENSG00000203668	2.3702	1.14274	1.24928	2.86242	1.64624	2.5075
NBEAL1	ENSG00000144426	2.03402	0.878697	1.09731	1.31707	0.583322	0.841326
TATDN2P2	ENSG00000218226	1.63934	1.25221	1.1973	1.99304	1.00617	1.21689
CLDN2	ENSG00000165376	1.59732	1.29478	1.5297	1.682	1.6968	1.30761
TMPPE	ENSG00000188167	1.2972	1.04917	1.17207	0.972465	0.862628	0.805761
RGPD6	ENSG00000183054	0.106451	0.0630044	0.162135	0.039617	0.0126562	0.07874
GSN-AS1	ENSG00000235865	0.955201	0.684602	0.711112	0.39309	0.221808	0.194033
SRFBP1	ENSG00000151304	2.86393	1.20029	1.98112	3.92497	2.64883	3.5136
GAS7	ENSG00000007237	0.321918	0.326182	0.273307	0.508874	0.424337	0.492549
MUC5AC	ENSG00000215182	0.11408	0.132628	0.0986517	0.0233275	0.0217979	0.0127853
TNS4	ENSG00000131746	0.223684	0.291403	0.364621	0.325749	0.390243	0.313908
PLCXD2	ENSG00000240891	0.248208	0.193399	0.179432	0.390056	0.306088	0.294747
CCDC144CP	ENSG00000154898	0.314201	0.187255	0.170427	0.259853	0.0570716	0.109553
ZNF66	ENSG00000160229	1.15936	0.796021	0.557009	1.01003	0.684235	0.852511
CENPE	ENSG00000138778	1.49412	0.609205	0.777395	4.39899	2.29853	3.74599
ZNF860	ENSG00000197385	0.855551	0.980572	0.772322	0.795006	0.65033	0.914832
VN1R83P	ENSG00000268521	6.92241	3.66378	3.61848	5.39643	2.27913	3.0794
PFN1P3	ENSG00000234367	3.18304	3.79402	3.1768	3.3412	2.10244	1.58548
SLC5A4-AS1	ENSG00000242082	1.03056	0.486828	0.538444	0.364798	0.204899	0.318401
KCNIP4	ENSG00000185774	0.0447199	0.0744415	0.0785917	0.0192035	0.00996909	0.0225536
TFCP2L1	ENSG00000115112	0.18214	0.17967	0.20747	0.212917	0.166924	0.227946
RPL23AP64	ENSG00000240970	5.88313	3.50619	4.9781	2.43276	1.16576	1.61173
DOK7	ENSG00000175920	0.45795	0.482145	0.605327	0.161355	0.261763	0.11844
SLC16A9	ENSG00000165449	0.383923	0.338339	0.317513	0.281238	0.201377	0.19742
SLC2A9	ENSG00000109667	0.235959	0.158699	0.201056	0.196509	0.159396	0.139435
ST6GALNAC2	ENSG00000070731	2.63639	2.22495	2.58944	0.962636	0.563077	0.690018
HSD17B14	ENSG00000087076	4.00615	5.34442	6.69096	1.68371	1.63411	1.57622
YPEL3	ENSG00000090238	22.8691	29.5287	30.9132	9.89078	11.5312	10.8398
CHRD	ENSG00000090539	0.178972	0.286004	0.327111	0.104521	0.0510682	0.067395
SLC7A8	ENSG00000092068	1.89852	1.95764	2.178	0.923962	0.81118	0.962802
BIRC7	ENSG00000101197	1.95683	1.52689	2.47176	0.288852	0.218111	0.267282
RENBP	ENSG00000102032	2.43095	3.36574	3.28213	0.616394	0.536753	0.498184
DHDH	ENSG00000104808	2.67248	2.42204	3.28766	0.573805	0.913492	0.838637
ID3	ENSG00000117318	27.8142	32.5893	33.07	11.3454	12.0336	10.992
SLC7A10	ENSG00000130876	0.258972	0.422637	0.78531	0.0523329	0.122253	0.0307312
CHIA	ENSG00000134216	0.418494	0.736278	0.585984	0.00876629	0	0.0274549
KCP	ENSG00000135253	2.7773	3.32144	3.51991	0.857908	1.01894	0.928695
AGT	ENSG00000135744	1.33934	1.51531	1.48615	0.317208	0.425816	0.401395
CYP27A1	ENSG00000135929	5.09983	6.36475	5.84474	1.15979	1.64333	1.35678
GPNMB	ENSG00000136235	15.0537	16.9373	14.9577	2.98407	2.3827	2.62241
ARRB2	ENSG00000141480	15.4232	19.1998	17.2889	5.01974	5.56847	4.86429
ACKR3	ENSG00000144476	2.95341	4.52248	3.72849	0.609545	0.449129	0.538835
C16orf89	ENSG00000153446	2.10936	2.5953	2.60567	0.374135	0.592893	0.894222
FTCD	ENSG00000160282	16.1202	17.8125	16.9574	5.21697	5.72501	5.14544
SSTR5	ENSG00000162009	0.869896	1.11982	1.05995	0.0298839	0.0620543	0.140389
DHRS3	ENSG00000162496	7.49642	9.83031	8.56175	3.14962	3.78708	3.62654
AQP7	ENSG00000165269	3.5456	3.64436	3.84754	0.441654	0.337879	0.388267
ART5	ENSG00000167311	0.15829	0.597248	0.44509	0.0815669	0.0846873	0.0851522
SCARA5	ENSG00000168079	1.61219	1.83715	1.90154	0.548268	0.482408	0.458379
KLHL30	ENSG00000168427	0.376126	0.473058	0.396607	0.150748	0.201233	0.101169
ATOH8	ENSG00000168874	2.50317	2.48934	2.86107	0.249571	0.181837	0.236543
CSDC2	ENSG00000172346	8.82187	12.7673	12.9429	1.34182	1.66053	1.14611
RND1	ENSG00000172602	1.27243	1.51864	1.58924	0.422689	0.556602	0.548895
NUPR1	ENSG00000176046	7.7954	6.62663	7.29849	2.82283	3.00754	3.34998
LRRC75B	ENSG00000178026	2.06353	2.73569	2.54747	0.547132	0.716253	0.838147
IGSF22	ENSG00000179057	1.86274	1.54493	1.91822	0.319957	0.262261	0.290071
TMEM125	ENSG00000179178	1.10832	1.45135	1.45435	0.209411	0.217422	0.268301
HCAR2	ENSG00000182782	0.803253	0.483906	0.833547	0.177393	0.143251	0.154326
ADRA2C	ENSG00000184160	4.85011	5.86511	6.34499	1.8866	2.11392	2.16452
APOBR	ENSG00000184730	1.41003	1.55092	1.63739	0.278633	0.322672	0.218161
BPIFB4	ENSG00000186191	0.791268	1.23308	0.927061	0.101213	0.105084	0.101888
MST1P2	ENSG00000186301	5.60594	4.15509	5.93786	1.59894	2.17659	1.79441
CYP4F8	ENSG00000186526	0.463902	0.35813	0.480497	0.0288707	0.0299751	0.0135629
IL17REL	ENSG00000188263	1.08991	1.53681	1.71262	0.0770869	0.182939	0.0689788
LDLRAD1	ENSG00000203985	0.378976	0.243486	0.51412	0	0.0355715	0.0804753
LILRB3	ENSG00000204577	0.735742	0.816485	0.936316	0.283257	0.361961	0.341202
PRRT4	ENSG00000224940	0.180148	0.214199	0.256292	0.0331539	0.0229481	0.0432639
LINC00689	ENSG00000231419	0.222522	0.195257	0.212205	0.0177776	0.00922886	0.0243588
SMIM1	ENSG00000235169	3.77035	6.4086	4.69698	0.368899	0.468125	0.513486
ECEL1P2	ENSG00000244280	0.416205	0.431089	0.325088	0.0238302	0.0494836	0.0559746
TPSP2	ENSG00000260284	22.686	32.849	29.3099	7.00606	9.14456	7.20953
LINC01917	ENSG00000260433	0.565536	0.401664	0.7421	0.135997	0.141199	0.121692
CDC37P2	ENSG00000261089	2.67126	1.78887	2.53613	0.830651	0.985632	1.20783
SSTR5-AS1	ENSG00000261713	0.200314	0.235374	0.124248	0.0303594	0.0105069	0.00792348
IGFL2-AS1	ENSG00000268621	10.8393	8.10334	9.85336	1.30549	1.26676	1.20366
IGFL1P1	ENSG00000268879	20.7998	28.4878	28.071	2.14816	2.58249	3.00978
CYP4F23P	ENSG00000269516	2.58119	2.53139	2.70768	0.592871	0.642315	0.464198
ATP6V1FNB	ENSG00000272899	0.768913	0.595954	0.58628	0.230606	0.185012	0.213385
EXOC3L2	ENSG00000283632	0.757439	0.527412	0.574217	0.0765313	0.0397295	0.0998691
ID2	ENSG00000115738	5.61079	7.12963	6.2475	4.96589	3.95283	4.62255
UCA1	ENSG00000214049	2.27034	1.97508	2.28569	1.05821	0.691769	0.759498
ZNF114	ENSG00000178150	10.8967	8.09659	10.2428	10.2768	8.80512	10.0553
SPP1	ENSG00000118785	1.78455	1.69748	1.60831	1.09474	1.11913	1.0989
IGFN1	ENSG00000163395	1.72484	1.51915	1.86046	1.82734	1.91468	1.61748
GPX3	ENSG00000211445	59.2624	81.6005	69.8365	48.1292	55.6904	51.8035
SLC7A5	ENSG00000103257	25.6457	31.6286	29.7788	41.0351	48.6457	42.685
LYPD3	ENSG00000124466	7.72256	10.2756	11.0285	6.66541	6.98891	5.67092
NECAB2	ENSG00000103154	0.66818	0.759595	0.725567	0.475882	0.81379	0.580817
CDT1	ENSG00000167513	2.73019	3.69675	3.03778	6.07579	7.93121	6.61612
RAB26	ENSG00000167964	3.86678	4.77733	5.17757	1.42326	1.42675	1.53705
ZDHHC11B	ENSG00000206077	0.844303	1.11478	1.14805	0.217006	0.17585	0.182341
DUSP2	ENSG00000158050	2.67793	3.38078	3.33898	1.4137	1.55541	1.38773
ANG	ENSG00000214274	4.44608	4.75127	5.13192	3.90331	3.31846	3.72054
ACP5	ENSG00000102575	8.02042	10.5762	9.32074	4.25285	4.61823	4.49802
APOE	ENSG00000130203	10.8249	14.4545	14.023	6.36794	6.3565	5.84399
TRIM63	ENSG00000158022	0.331155	0.81666	0.40954	0.142204	0.0164049	0.0742272
PNPLA7	ENSG00000130653	6.5564	8.25888	8.66856	1.0501	1.33924	1.08439
RASGRP3	ENSG00000152689	0.0969971	0.0684995	0.0826496	0.0227195	0.0314514	0.0385419
CD79A	ENSG00000105369	0.38788	0.313053	0.413132	0.211989	0.282984	0.237115
CKMT1A	ENSG00000223572	1.24581	1.11739	1.13969	0.41039	0.623917	0.608216
TMPRSS2	ENSG00000184012	0.762414	0.534789	0.699435	0.488003	0.391227	0.483658
HPN	ENSG00000105707	0.154097	0.139916	0.229781	0.0842191	0.0874409	0.0565206
EVI2A	ENSG00000126860	7.03354	4.00497	5.09189	2.84887	2.01298	2.76756
ANKRD33	ENSG00000167612	0.395039	0.551526	0.388182	0.393995	0.34089	0.325623
ITGA2B	ENSG00000005961	0.765594	0.868083	0.88723	0.471699	0.601049	0.559582
SMIM38	ENSG00000284713	1.35639	1.70474	2.12527	0.561405	0.56831	0.560441
METRNL	ENSG00000176845	1.62576	3.02637	1.98669	2.26706	2.08879	1.98662
FAM110D	ENSG00000197245	0.541815	0.657646	0.733985	0.159957	0.166077	0.136627
YPEL4	ENSG00000166793	0.658811	0.518854	0.697175	0.419795	0.331629	0.271523
S1PR4	ENSG00000125910	1.11142	0.853884	1.06843	0.73425	1.06727	0.843176
TBXA2R	ENSG00000006638	0.821437	1.0046	1.08025	1.05102	1.07628	0.980734
GAL3ST1	ENSG00000128242	0.551247	0.798665	0.78937	0.631241	0.58712	0.607504
SCGB1D2	ENSG00000124935	0.52079	0.693533	0.610165	0	0.0928768	0.21012
ROR2	ENSG00000169071	0.314334	0.375664	0.396607	0.228429	0.165299	0.265569
CLK2P1	ENSG00000232553	0.109873	0.365793	0.600734	0.314543	0.881756	0.197021
ENHO	ENSG00000168913	1.56744	1.84178	1.56637	0.950239	0.945482	1.08501
SPTBN4	ENSG00000160460	0.0805505	0.138555	0.113249	0.100311	0.0897828	0.0866647
PSG3	ENSG00000221826	0.543933	0.402418	0.310469	0.155717	0.17411	0.140678
SHISAL1	ENSG00000138944	0.21438	0.107442	0.194455	0.201936	0.209661	0.265065
MAF	ENSG00000178573	0.250536	0.187859	0.396664	0.203539	0.156984	0.145704
RPL7P19	ENSG00000241458	1.0736	1.61693	1.61723	1.25135	3.00873	1.28917
DUSP26	ENSG00000133878	0.0961784	0.1601	0.197197	0	0	0.0161686
VIPR2	ENSG00000106018	0.0184692	0.0409921	0.0432775	0.007931	0.0082344	0.00620971
CACNG3	ENSG00000006116	0.469716	0.49383	0.347574	0.0849283	0.132266	0.24936
GIP	ENSG00000159224	0.397139	0.367269	0.387744	0.113692	0.472167	0.222543
CFAP99	ENSG00000206113	0.0455867	0.161887	0.042728	0.0234909	0.0243895	0.0367852
SERHL	ENSG00000172250	0.0999829	0.240404	0.370948	0.243295	0.237744	0.156876
LINC02019	ENSG00000273356	0.483121	0.638264	0.566032	0.513713	0.410281	0.52598
NPFF	ENSG00000139574	1.83909	1.80543	2.23757	1.45798	1.26146	1.14155
PLA2G4D	ENSG00000159337	0.119723	0.153302	0.107899	0.371743	0.24636	0.216748
FOXD3-AS1	ENSG00000230798	0.666939	1.00136	0.919288	0.37063	0.244878	0.395715
RASA4B	ENSG00000170667	0.265992	0.244786	0.418053	0.245159	0.133054	0.170138

## Sheet: Table S5D
Gene name	Gene id	Ctrl-1	Ctrl-2	Ctrl-3	Alm-1	Alm-2	Alm-3
TNFRSF12A	ENSG00000006327	34.6821	44.796	41.1582	14.913	14.8776	12.7338
DEPDC1B	ENSG00000035499	1.71836	1.28511	1.12334	0.573937	0.520613	0.83472
DGKG	ENSG00000058866	0.379999	0.273148	0.232724	0.117611	0.102581	0.140213
MCM10	ENSG00000065328	0.486427	0.3663	0.346014	0.154687	0.156823	0.127375
TIGAR	ENSG00000078237	0.105382	0.10581	0.0940703	0.0210273	0.0286105	0.0262811
PUS7	ENSG00000091127	5.14223	3.36936	3.97055	1.90385	1.80823	2.14997
LAMB1	ENSG00000091136	1.8761	2.10462	1.96213	0.867836	0.731496	0.803656
ITGA6	ENSG00000091409	12.3606	8.29959	9.12808	4.26659	3.70836	5.3066
CLSPN	ENSG00000092853	0.296477	0.208376	0.1621	0.077644	0.0704301	0.11904
HAS3	ENSG00000103044	6.00601	6.34149	6.53487	2.76869	2.45949	2.29107
SQLE	ENSG00000104549	7.76104	5.59525	5.98458	2.14497	2.0189	3.44769
SERPINE1	ENSG00000106366	8.3041	9.59871	8.3569	3.64948	4.20936	3.74343
CCND1	ENSG00000110092	19.988	18.8787	16.6307	3.28468	3.50919	3.326
SH2B3	ENSG00000111252	8.65295	7.44613	7.6764	3.47093	3.04586	3.22698
F3	ENSG00000117525	2.36467	1.94991	2.03938	0.739695	0.780197	0.808409
EREG	ENSG00000124882	4.03988	2.87222	3.02263	1.41646	1.22968	1.39891
LDLR	ENSG00000130164	58.2544	77.8613	63.9681	34.9317	32.4956	23.1005
MICAL2	ENSG00000133816	3.95715	4.0945	3.55556	1.79483	1.55225	1.40374
FGFBP1	ENSG00000137440	2.59586	2.84181	3.28794	0.330725	0.299998	0.220458
KNL1	ENSG00000137812	1.06805	0.646508	0.557959	0.34873	0.224067	0.503662
EPHA2	ENSG00000142627	17.0181	21.2861	20.6627	7.52896	7.61244	6.35331
MALL	ENSG00000144063	3.25221	4.65176	4.59357	1.72236	1.9057	1.00301
CDCA7	ENSG00000144354	2.9635	1.81816	1.94775	1.00957	0.789852	1.2492
HOMER1	ENSG00000152413	0.874303	0.441812	0.58534	0.269857	0.192861	0.376121
PADI4	ENSG00000159339	3.81241	4.30161	4.09289	1.87153	1.97048	1.8546
PTX3	ENSG00000163661	5.78564	6.44849	7.48586	1.94999	2.462	2.58211
ITGA2	ENSG00000164171	15.3772	9.79789	10.5481	5.58953	3.95236	5.40656
GALNT10	ENSG00000164574	7.56753	6.69437	6.74489	2.93257	2.52281	2.56333
DDIAS	ENSG00000165490	0.967544	0.620594	0.800791	0.260363	0.354258	0.399796
DDX21	ENSG00000165732	19.2217	12.6591	13.1081	6.75851	5.63252	7.87568
SPRED1	ENSG00000166068	1.6633	0.855059	1.19647	0.301076	0.284725	0.365092
ANGPTL4	ENSG00000167772	2.62331	3.3787	2.96133	0.682	0.60044	0.541525
IL7R	ENSG00000168685	4.29834	3.70422	3.54179	1.26176	1.12957	1.41828
CXCL8	ENSG00000169429	2.24365	1.03354	1.11596	0.199558	0.241356	0.687286
CTPS1	ENSG00000171793	1.46879	1.38973	1.43239	0.631465	0.532458	0.733658
EXO1	ENSG00000174371	1.32885	1.23314	0.966353	0.528017	0.402761	0.731937
FOSL1	ENSG00000175592	5.44994	7.27438	6.88545	1.60486	0.978459	1.42053
BEND3	ENSG00000178409	0.367898	0.371157	0.454545	0.231236	0.152546	0.175158
RRS1	ENSG00000179041	10.1948	12.5673	10.4594	5.51297	5.34112	4.64651
EGR3	ENSG00000179388	0.517893	0.501582	0.419223	0.019728	0.0178951	0.0295886
AEN	ENSG00000181026	1.18163	1.42571	1.14283	0.407067	0.308961	0.274115
PHLDA2	ENSG00000181649	38.1711	43.332	42.6094	6.36758	8.17447	7.7697
ERCC6L	ENSG00000186871	1.44009	0.738529	1.07369	0.46857	0.331735	0.514224
SPRY4	ENSG00000187678	2.49431	2.26258	2.15154	0.416553	0.357241	0.48466
WNT7B	ENSG00000188064	8.63876	10.1873	9.79339	4.45637	3.58136	3.0976
FAM111B	ENSG00000189057	0.895112	0.557907	0.58901	0.154139	0.163121	0.398146
IL1RAP	ENSG00000196083	3.20648	2.31613	2.31554	1.16833	0.806526	1.1682
APCDD1L	ENSG00000198768	2.96059	3.13559	3.4291	1.20281	1.21942	1.10835
APCDD1L-DT	ENSG00000231290	4.08691	3.45909	3.77338	1.86142	1.6533	1.62855
SCIRT	ENSG00000237686	0.294868	0.436305	0.287893	0.102963	0.0622648	0.0686343
LINC00973	ENSG00000240476	3.25142	3.44423	3.23222	0.980526	1.1703	1.49642
SLC22A18AS	ENSG00000254827	1.33888	1.69076	1.46047	0.628731	0.592251	0.411045
UHRF1	ENSG00000276043	7.6085	9.70081	8.74155	4.15884	4.00002	2.74972
EGR1	ENSG00000120738	12.3881	14.8541	13.7883	0.30069	0.430663	0.379775
DUSP4	ENSG00000120875	10.2825	8.95952	9.79494	3.65191	3.49837	3.74704
DUSP6	ENSG00000139318	2.2474	2.08518	2.14388	0.334487	0.373427	0.321584
AREG	ENSG00000109321	4.47366	3.71546	4.76798	0.665166	0.548514	0.634857
FOS	ENSG00000170345	2.33538	2.82278	2.84073	0.483055	0.42404	0.373934
ENC1	ENSG00000171617	8.10847	7.57587	6.75793	3.01518	2.6426	2.79905
TGM2	ENSG00000198959	17.3099	20.7248	17.9052	5.91524	6.19289	4.83407
ABCC3	ENSG00000108846	14.9939	16.1471	16.054	5.77778	5.4611	4.12503
SYT12	ENSG00000173227	15.0018	16.7101	17.35	5.9983	6.75842	6.20441
CREB5	ENSG00000146592	3.55815	2.70596	2.45278	1.16028	0.917546	0.99016
MYEOV	ENSG00000172927	1.2648	1.6001	1.52631	0.251739	0.240368	0.211966
SPRED2	ENSG00000198369	5.31168	4.3087	4.37745	1.93893	1.78332	1.78541
ETV1	ENSG00000006468	4.98317	3.40774	3.70167	1.53351	1.33483	1.69854
TRIM14	ENSG00000106785	9.54583	7.42691	7.92201	3.6231	3.57405	3.47777
S1PR3	ENSG00000213694	3.43109	3.31249	3.48095	1.57611	1.53484	1.52158
RAB7B	ENSG00000276600	7.30293	7.02	6.88414	2.69374	2.8955	3.12437
CCN2	ENSG00000118523	15.2432	18.2208	14.4394	6.20039	5.64357	4.73467
ETV5	ENSG00000244405	5.91065	4.78283	5.35725	2.46809	1.84875	2.41621
MAOB	ENSG00000069535	10.6243	10.5367	10.4721	4.54441	4.40219	5.04114
LPCAT2	ENSG00000087253	7.57137	4.82274	5.74787	2.30659	2.19628	2.75814
AMOTL1	ENSG00000166025	4.81007	4.49898	3.94709	2.11353	1.89471	1.77674
XDH	ENSG00000158125	0.719007	0.424976	0.805772	0.0900563	0.051984	0.0982317
SFTPB	ENSG00000168878	0.899409	1.26684	1.12131	0.229505	0.186268	0.205323
CRISPLD2	ENSG00000103196	2.20829	2.05431	1.91778	0.879179	0.706999	0.935188
ITGB3	ENSG00000259207	2.97508	2.5301	2.57482	1.11194	1.20041	1.30755
EGR2	ENSG00000122877	0.560298	0.505203	0.574397	0.0366839	0.0665512	0.0122265
IRS1	ENSG00000169047	4.39436	4.55116	4.31165	2.1208	2.19794	1.70437
BDKRB2	ENSG00000168398	3.14331	3.58815	3.22848	1.61013	1.50658	1.43589
DNAH5	ENSG00000039139	0.65038	0.395801	0.460325	0.225771	0.146799	0.163814
NHS	ENSG00000188158	5.44288	4.20188	3.94963	2.50707	1.85834	1.86137
RAPH1	ENSG00000173166	1.2845	0.819077	0.855186	0.444256	0.263487	0.269085
CCDC144B	ENSG00000154874	2.85309	1.40779	1.31241	0.752206	0.495818	0.290819
HS6ST2	ENSG00000171004	3.38243	2.54448	2.29782	1.35974	1.1884	1.09164
PLK5	ENSG00000185988	12.5758	12.9496	12.9027	6.23694	6.11097	3.42429
LONRF3	ENSG00000175556	1.82953	1.27545	1.53893	0.614273	0.624065	0.565065
NFAT5	ENSG00000102908	10.1511	5.32631	5.74513	3.80795	2.50687	2.45762
KCNQ1OT1	ENSG00000269821	0.237303	0.135402	0.147191	0.0882785	0.0677949	0.0649827
PLLP	ENSG00000102934	0.936405	0.851878	1.02056	0.359296	0.372473	0.501815
PLK3	ENSG00000173846	2.79195	3.46193	3.62156	1.43251	1.57013	1.47711
ANKRD36C	ENSG00000174501	2.12252	0.76675	0.990824	0.451639	0.378164	0.468955
MUC16	ENSG00000181143	6.40759	5.0433	4.89502	3.29951	2.44943	1.67165
SELENOI	ENSG00000138018	4.73808	2.53986	3.03855	1.48612	1.28485	1.98513
ARRDC4	ENSG00000140450	1.43506	1.23002	1.3396	0.611098	0.487802	0.598806
PADI1	ENSG00000142623	1.59487	1.609	1.71003	0.901174	0.642935	0.728954
FAM86C1P	ENSG00000158483	1.55959	1.40331	1.36631	0.632896	0.587445	0.662256
ZBTB20	ENSG00000181722	0.657398	0.297404	0.239392	0.17992	0.129438	0.0775427
SCEL	ENSG00000136155	0.642411	0.36271	0.435749	0.0708379	0.0749658	0.188879
SYNE3	ENSG00000176438	0.195093	0.170316	0.149335	0.0681233	0.0593222	0.0653908
CHML	ENSG00000203668	2.3702	1.14274	1.24928	0.612751	0.474763	0.899872
NBEAL1	ENSG00000144426	2.03402	0.878697	1.09731	0.739581	0.453472	0.623422
TATDN2P2	ENSG00000218226	1.63934	1.25221	1.1973	0.446052	0.546222	0.5352
CLDN2	ENSG00000165376	1.59732	1.29478	1.5297	0.843916	0.593929	0.5092
TMPPE	ENSG00000188167	1.2972	1.04917	1.17207	0.690961	0.449181	0.36847
RGPD6	ENSG00000183054	0.106451	0.0630044	0.162135	0.0223026	0.0236022	0.0260166
GSN-AS1	ENSG00000235865	0.955201	0.684602	0.711112	0.42735	0.312007	0.239705
SRFBP1	ENSG00000151304	2.86393	1.20029	1.98112	0.797904	0.607967	1.1648
GAS7	ENSG00000007237	0.321918	0.326182	0.273307	0.136845	0.132998	0.131943
MUC5AC	ENSG00000215182	0.11408	0.132628	0.0986517	0.0312988	0.0361338	0.0512102
TNS4	ENSG00000131746	0.223684	0.291403	0.364621	0.0815031	0.101655	0.0407468
PLCXD2	ENSG00000240891	0.248208	0.193399	0.179432	0.0774502	0.0802906	0.0497836
CCDC144CP	ENSG00000154898	0.314201	0.187255	0.170427	0.0975235	0.0497602	0.0670396
ZNF66	ENSG00000160229	1.15936	0.796021	0.557009	0.384443	0.388352	0.393134
CENPE	ENSG00000138778	1.49412	0.609205	0.777395	0.460052	0.294837	0.564997
ZNF860	ENSG00000197385	0.855551	0.980572	0.772322	0.426079	0.333183	0.411339
VN1R83P	ENSG00000268521	6.92241	3.66378	3.61848	1.89657	1.31557	1.89635
PFN1P3	ENSG00000234367	3.18304	3.79402	3.1768	1.35846	1.0082	0.61741
SLC5A4-AS1	ENSG00000242082	1.03056	0.486828	0.538444	0.35013	0.291133	0.306328
KCNIP4	ENSG00000185774	0.0447199	0.0744415	0.0785917	0	0	0
TFCP2L1	ENSG00000115112	0.18214	0.17967	0.20747	0.0954009	0.0673067	0.0582937
RPL23AP64	ENSG00000240970	5.88313	3.50619	4.9781	2.73907	1.44934	1.48349
DOK7	ENSG00000175920	0.45795	0.482145	0.605327	0.196811	0.25663	0.184489
SLC16A9	ENSG00000165449	0.383923	0.338339	0.317513	0.153775	0.128758	0.0827921
SLC2A9	ENSG00000109667	0.235959	0.158699	0.201056	0.0823931	0.0407661	0.074894
ST6GALNAC2	ENSG00000070731	2.63639	2.22495	2.58944	5.78812	5.53537	5.65516
HSD17B14	ENSG00000087076	4.00615	5.34442	6.69096	23.3941	26.0398	21.7397
YPEL3	ENSG00000090238	22.8691	29.5287	30.9132	51.7369	56.8115	54.1964
CHRD	ENSG00000090539	0.178972	0.286004	0.327111	0.712436	0.625836	0.38992
SLC7A8	ENSG00000092068	1.89852	1.95764	2.178	4.31737	4.55517	4.25886
BIRC7	ENSG00000101197	1.95683	1.52689	2.47176	3.97165	4.53235	3.90713
RENBP	ENSG00000102032	2.43095	3.36574	3.28213	10.7683	10.9338	8.3905
DHDH	ENSG00000104808	2.67248	2.42204	3.28766	6.01906	5.92539	4.33881
ID3	ENSG00000117318	27.8142	32.5893	33.07	76.7582	82.5103	89.1923
SLC7A10	ENSG00000130876	0.258972	0.422637	0.78531	1.10111	1.31726	1.03715
CHIA	ENSG00000134216	0.418494	0.736278	0.585984	1.20826	1.38697	1.44333
KCP	ENSG00000135253	2.7773	3.32144	3.51991	9.79435	9.69693	5.99244
AGT	ENSG00000135744	1.33934	1.51531	1.48615	2.97803	3.04876	2.8331
CYP27A1	ENSG00000135929	5.09983	6.36475	5.84474	13.1978	13.0283	11.9149
GPNMB	ENSG00000136235	15.0537	16.9373	14.9577	44.6776	38.8034	43.336
ARRB2	ENSG00000141480	15.4232	19.1998	17.2889	33.6985	35.4668	31.9603
ACKR3	ENSG00000144476	2.95341	4.52248	3.72849	7.29094	8.31044	5.73135
C16orf89	ENSG00000153446	2.10936	2.5953	2.60567	5.16391	5.18522	5.23535
FTCD	ENSG00000160282	16.1202	17.8125	16.9574	33.4401	35.0929	30.0302
SSTR5	ENSG00000162009	0.869896	1.11982	1.05995	2.36928	3.53783	1.71297
DHRS3	ENSG00000162496	7.49642	9.83031	8.56175	15.9459	18.1285	16.5089
AQP7	ENSG00000165269	3.5456	3.64436	3.84754	8.14667	8.75284	7.98507
ART5	ENSG00000167311	0.15829	0.597248	0.44509	1.26021	1.1732	1.32638
SCARA5	ENSG00000168079	1.61219	1.83715	1.90154	4.09179	4.1126	3.33198
KLHL30	ENSG00000168427	0.376126	0.473058	0.396607	0.998165	0.941166	0.787933
ATOH8	ENSG00000168874	2.50317	2.48934	2.86107	6.00276	6.54955	5.59622
CSDC2	ENSG00000172346	8.82187	12.7673	12.9429	33.4112	38.8846	29.688
RND1	ENSG00000172602	1.27243	1.51864	1.58924	2.90479	3.09117	3.34452
NUPR1	ENSG00000176046	7.7954	6.62663	7.29849	14.9532	18.0606	22.1072
LRRC75B	ENSG00000178026	2.06353	2.73569	2.54747	5.00518	5.90877	4.91756
IGSF22	ENSG00000179057	1.86274	1.54493	1.91822	3.63561	3.40961	3.97406
TMEM125	ENSG00000179178	1.10832	1.45135	1.45435	2.94901	3.24372	2.80936
HCAR2	ENSG00000182782	0.803253	0.483906	0.833547	1.20207	1.37389	1.49039
ADRA2C	ENSG00000184160	4.85011	5.86511	6.34499	10.7311	16.0581	11.755
APOBR	ENSG00000184730	1.41003	1.55092	1.63739	2.90187	3.87725	3.45047
BPIFB4	ENSG00000186191	0.791268	1.23308	0.927061	4.70883	4.65528	3.61497
MST1P2	ENSG00000186301	5.60594	4.15509	5.93786	10.5099	9.86755	9.1436
CYP4F8	ENSG00000186526	0.463902	0.35813	0.480497	1.23251	1.2266	0.922515
IL17REL	ENSG00000188263	1.08991	1.53681	1.71262	3.94908	4.04517	2.57869
LDLRAD1	ENSG00000203985	0.378976	0.243486	0.51412	1.19099	1.11824	0.87747
LILRB3	ENSG00000204577	0.735742	0.816485	0.936316	2.03313	1.63932	1.12938
PRRT4	ENSG00000224940	0.180148	0.214199	0.256292	0.431349	0.537999	0.566079
LINC00689	ENSG00000231419	0.222522	0.195257	0.212205	0.477048	0.472065	0.352324
SMIM1	ENSG00000235169	3.77035	6.4086	4.69698	10.649	11.5644	10.6478
ECEL1P2	ENSG00000244280	0.416205	0.431089	0.325088	0.813862	1.13373	0.84283
TPSP2	ENSG00000260284	22.686	32.849	29.3099	108.976	112.804	76.9823
LINC01917	ENSG00000260433	0.565536	0.401664	0.7421	1.51662	1.4402	1.08994
CDC37P2	ENSG00000261089	2.67126	1.78887	2.53613	3.37725	4.1138	5.78889
SSTR5-AS1	ENSG00000261713	0.200314	0.235374	0.124248	0.555458	0.459063	0.468998
IGFL2-AS1	ENSG00000268621	10.8393	8.10334	9.85336	21.5637	19.3577	23.689
IGFL1P1	ENSG00000268879	20.7998	28.4878	28.071	61.2295	60.7945	55.7068
CYP4F23P	ENSG00000269516	2.58119	2.53139	2.70768	6.53976	6.13179	5.40724
ATP6V1FNB	ENSG00000272899	0.768913	0.595954	0.58628	1.45753	1.3685	1.32952
EXOC3L2	ENSG00000283632	0.757439	0.527412	0.574217	1.33799	1.31246	1.46228
ID2	ENSG00000115738	5.61079	7.12963	6.2475	22.3439	22.7302	24.4722
UCA1	ENSG00000214049	2.27034	1.97508	2.28569	6.90783	6.45032	8.34101
ZNF114	ENSG00000178150	10.8967	8.09659	10.2428	23.5874	24.0704	34.2406
SPP1	ENSG00000118785	1.78455	1.69748	1.60831	3.86893	3.65854	3.8137
IGFN1	ENSG00000163395	1.72484	1.51915	1.86046	4.29794	3.84288	2.88408
GPX3	ENSG00000211445	59.2624	81.6005	69.8365	152.171	163.526	133.472
SLC7A5	ENSG00000103257	25.6457	31.6286	29.7788	54.8977	60.0534	52.203
LYPD3	ENSG00000124466	7.72256	10.2756	11.0285	21.0898	25.136	19.2362
NECAB2	ENSG00000103154	0.66818	0.759595	0.725567	2.33887	2.15254	1.77529
CDT1	ENSG00000167513	2.73019	3.69675	3.03778	7.12306	7.24444	6.31288
RAB26	ENSG00000167964	3.86678	4.77733	5.17757	10.0369	11.4936	8.63907
ZDHHC11B	ENSG00000206077	0.844303	1.11478	1.14805	2.13689	2.21944	2.14955
DUSP2	ENSG00000158050	2.67793	3.38078	3.33898	6.20248	6.3966	6.69069
ANG	ENSG00000214274	4.44608	4.75127	5.13192	9.34951	9.51357	8.93447
ACP5	ENSG00000102575	8.02042	10.5762	9.32074	18.5384	18.4051	16.1214
APOE	ENSG00000130203	10.8249	14.4545	14.023	25.1224	30.0638	22.9071
TRIM63	ENSG00000158022	0.331155	0.81666	0.40954	1.94651	1.88803	1.61869
PNPLA7	ENSG00000130653	6.5564	8.25888	8.66856	17.8109	17.8531	11.7734
RASGRP3	ENSG00000152689	0.0969971	0.0684995	0.0826496	0.295592	0.234612	0.277085
CD79A	ENSG00000105369	0.38788	0.313053	0.413132	1.6253	1.60832	1.40351
CKMT1A	ENSG00000223572	1.24581	1.11739	1.13969	2.52071	2.04327	2.59192
TMPRSS2	ENSG00000184012	0.762414	0.534789	0.699435	1.26581	1.2644	1.28073
HPN	ENSG00000105707	0.154097	0.139916	0.229781	0.851151	0.665578	0.498892
EVI2A	ENSG00000126860	7.03354	4.00497	5.09189	9.95807	7.74871	16.182
ANKRD33	ENSG00000167612	0.395039	0.551526	0.388182	1.02789	1.29565	1.01442
ITGA2B	ENSG00000005961	0.765594	0.868083	0.88723	1.54298	1.87407	1.42077
SMIM38	ENSG00000284713	1.35639	1.70474	2.12527	3.37247	3.71134	3.09821
METRNL	ENSG00000176845	1.62576	3.02637	1.98669	4.79791	6.16276	3.91845
FAM110D	ENSG00000197245	0.541815	0.657646	0.733985	1.36574	1.33538	1.56066
YPEL4	ENSG00000166793	0.658811	0.518854	0.697175	1.09087	1.24194	1.30221
S1PR4	ENSG00000125910	1.11142	0.853884	1.06843	1.82103	2.68086	2.32826
TBXA2R	ENSG00000006638	0.821437	1.0046	1.08025	2.10735	2.07085	1.633
GAL3ST1	ENSG00000128242	0.551247	0.798665	0.78937	1.65218	1.81878	1.21894
SCGB1D2	ENSG00000124935	0.52079	0.693533	0.610165	2.40044	2.47434	3.38205
ROR2	ENSG00000169071	0.314334	0.375664	0.396607	0.844312	0.704598	0.650044
CLK2P1	ENSG00000232553	0.109873	0.365793	0.600734	1.26608	2.4013	0.920676
ENHO	ENSG00000168913	1.56744	1.84178	1.56637	3.04248	3.37309	3.76644
SPTBN4	ENSG00000160460	0.0805505	0.138555	0.113249	0.257362	0.275548	0.232021
PSG3	ENSG00000221826	0.543933	0.402418	0.310469	1.08116	0.874684	0.803469
SHISAL1	ENSG00000138944	0.21438	0.107442	0.194455	0.528838	0.427133	0.296984
MAF	ENSG00000178573	0.250536	0.187859	0.396664	0.48234	0.636986	0.631224
RPL7P19	ENSG00000241458	1.0736	1.61693	1.61723	4.57896	2.84189	3.37358
DUSP26	ENSG00000133878	0.0961784	0.1601	0.197197	0.453384	0.753977	0.478516
VIPR2	ENSG00000106018	0.0184692	0.0409921	0.0432775	0.164453	0.166724	0.154762
CACNG3	ENSG00000006116	0.469716	0.49383	0.347574	1.24308	0.775216	1.11346
GIP	ENSG00000159224	0.397139	0.367269	0.387744	1.59476	1.06922	1.45591
CFAP99	ENSG00000206113	0.0455867	0.161887	0.042728	0.286527	0.32055	0.219645
SERHL	ENSG00000172250	0.0999829	0.240404	0.370948	0.663337	0.696713	0.54108
LINC02019	ENSG00000273356	0.483121	0.638264	0.566032	1.01219	0.96187	1.6145
NPFF	ENSG00000139574	1.83909	1.80543	2.23757	4.22358	4.16723	3.18584
PLA2G4D	ENSG00000159337	0.119723	0.153302	0.107899	0.356954	0.358794	0.231511
FOXD3-AS1	ENSG00000230798	0.666939	1.00136	0.919288	1.64389	1.75211	2.01353
RASA4B	ENSG00000170667	0.265992	0.244786	0.418053	0.387378	0.782915	0.625169

## Sheet: Table S5E
Gene name	Gene id	shNC-1	shNC-2	shNC-3	shEGFR1	shEGFR2	shEGFR3
TNFRSF12A	ENSG00000006327	132.121	133.643	130.142	111.381	102.921	109.623
DEPDC1B	ENSG00000035499	7.36148	6.71983	7.33097	7.6901	7.73414	7.92443
DGKG	ENSG00000058866	1.09737	1.08993	1.05972	1.11724	1.06884	1.14286
MCM10	ENSG00000065328	5.81869	5.54992	5.90151	5.89552	5.70924	6.30886
TIGAR	ENSG00000078237	0.266792	0.317981	0.297263	0.302358	0.307039	0.248391
PUS7	ENSG00000091127	13.584	12.521	13.4735	13.148	11.9921	12.5489
LAMB1	ENSG00000091136	2.2686	2.35283	2.22799	1.70074	1.61163	1.62222
ITGA6	ENSG00000091409	30.6319	28.5134	31.0827	23.0866	22.5626	22.8939
CLSPN	ENSG00000092853	3.15769	2.66141	3.18095	3.27058	3.1745	3.43416
HAS3	ENSG00000103044	13.4701	14.2547	13.3206	12.6542	12.7157	12.6589
SQLE	ENSG00000104549	7.93625	7.48719	8.4775	7.9985	8.19499	8.65172
SERPINE1	ENSG00000106366	49.8488	50.7322	48.6881	62.8684	65.4981	64.3321
CCND1	ENSG00000110092	74.5873	75.3434	76.186	58.4591	58.2103	57.6977
SH2B3	ENSG00000111252	9.22715	9.69082	9.52206	7.90985	7.21336	7.87687
F3	ENSG00000117525	12.9209	12.4692	14.0255	17.5185	17.583	18.0978
EREG	ENSG00000124882	10.5053	9.43534	10.5099	6.42414	6.2445	6.5446
LDLR	ENSG00000130164	45.7439	48.3429	45.578	37.2651	36.1241	37.3153
MICAL2	ENSG00000133816	6.94283	6.96767	6.97861	7.17684	6.7451	6.91123
FGFBP1	ENSG00000137440	1.49198	1.37073	1.27223	1.18113	1.20324	0.779585
KNL1	ENSG00000137812	4.58687	4.56556	4.87409	5.39957	5.21642	4.83874
EPHA2	ENSG00000142627	35.0588	36.5013	34.0562	31.0809	30.6194	31.3069
MALL	ENSG00000144063	18.1933	17.1922	16.3491	11.0143	9.6646	9.12574
CDCA7	ENSG00000144354	13.8724	13.4731	13.646	13.4174	13.8482	13.7147
HOMER1	ENSG00000152413	2.79723	2.42378	3.11898	2.73215	2.59077	2.54706
PADI4	ENSG00000159339	1.20424	1.07816	1.02206	0.819772	0.975995	0.741227
PTX3	ENSG00000163661	12.6514	12.4063	13.0156	10.6986	12.4994	11.5364
ITGA2	ENSG00000164171	20.9263	20.55	21.4812	13.5134	12.5805	13.7449
GALNT10	ENSG00000164574	21.4895	22.0734	21.8724	19.5078	19.3176	19.8683
DDIAS	ENSG00000165490	6.78622	7.02147	7.12004	7.30674	6.99464	7.40656
DDX21	ENSG00000165732	46.8958	43.6291	49.0498	42.6254	42.309	43.3683
SPRED1	ENSG00000166068	3.60219	3.29363	3.59652	3.07762	3.18029	2.9033
ANGPTL4	ENSG00000167772	15.1073	15.3285	13.5072	7.78763	7.13604	7.48569
IL7R	ENSG00000168685	31.3065	30.9031	33.2337	24.4001	24.3756	25.2808
CXCL8	ENSG00000169429	2.27314	2.25774	2.41813	1.23782	1.1381	1.26152
CTPS1	ENSG00000171793	5.58804	5.50535	5.86837	5.81511	6.03293	5.82339
EXO1	ENSG00000174371	14.8483	14.8082	15.1784	14.9414	16.0042	15.5413
FOSL1	ENSG00000175592	61.5543	60.0762	57.2171	81.8479	80.2091	77.1255
BEND3	ENSG00000178409	1.9417	1.69542	1.74669	1.68917	1.81071	1.54736
RRS1	ENSG00000179041	72.6871	72.8929	67.3192	59.2773	60.0779	56.4463
EGR3	ENSG00000179388	0.110135	0.0894997	0.0967594	0.0584035	0.0611051	0.0856075
AEN	ENSG00000181026	7.85051	8.0402	7.89983	6.91437	7.42535	7.68253
PHLDA2	ENSG00000181649	79.2574	78.6115	76.6293	60.7973	56.3031	56.1474
ERCC6L	ENSG00000186871	7.31979	7.23562	8.04528	8.81603	7.71686	8.7614
SPRY4	ENSG00000187678	3.92064	4.1155	4.12544	2.56886	2.54693	2.56348
WNT7B	ENSG00000188064	14.2644	13.4879	13.4153	10.9361	10.7501	10.5737
FAM111B	ENSG00000189057	7.66632	7.54962	8.39012	7.74654	7.72975	7.12221
IL1RAP	ENSG00000196083	10.019	9.09807	10.1718	9.54796	8.97849	9.9533
APCDD1L	ENSG00000198768	4.11752	4.27983	4.36161	4.95727	4.85263	4.87833
APCDD1L-DT	ENSG00000231290	4.64476	4.03467	4.48426	5.3138	4.88009	4.83897
SCIRT	ENSG00000237686	1.01027	1.07263	0.9902	0.624149	0.440409	0.661923
LINC00973	ENSG00000240476	24.9863	24.2967	25.7878	17.8969	17.1263	18.5622
SLC22A18AS	ENSG00000254827	1.8409	1.73091	1.6186	1.08406	1.11281	1.02603
UHRF1	ENSG00000276043	49.138	52.7643	48.39	54.651	54.7794	54.0427
EGR1	ENSG00000120738	4.32112	4.78644	4.40153	2.95832	2.74503	3.08271
DUSP4	ENSG00000120875	8.77854	8.98055	9.52388	6.2356	6.4153	7.10238
DUSP6	ENSG00000139318	8.51397	8.98803	9.60574	3.98267	4.05304	4.18072
AREG	ENSG00000109321	13.5033	13.1069	13.2939	5.80525	5.40486	4.78153
FOS	ENSG00000170345	1.62911	1.57094	1.73533	1.18622	0.882552	1.18707
ENC1	ENSG00000171617	10.2524	10.2856	10.3801	10.6882	10.1693	11.4973
TGM2	ENSG00000198959	20.7831	21.5365	20.3135	24.108	23.5593	22.9189
ABCC3	ENSG00000108846	16.9387	17.5007	16.2345	11.3333	10.9665	11.0585
SYT12	ENSG00000173227	4.08483	4.48779	4.26545	3.01601	2.79341	2.70132
CREB5	ENSG00000146592	2.99391	2.70797	2.79574	2.33669	2.45982	2.54922
MYEOV	ENSG00000172927	11.6868	11.6477	11.6283	6.0405	5.19429	5.43002
SPRED2	ENSG00000198369	10.8106	10.7192	10.8654	9.56551	9.28172	9.21817
ETV1	ENSG00000006468	4.58583	4.2164	4.94573	3.96993	3.82914	4.18738
TRIM14	ENSG00000106785	16.4663	18.5463	17.5611	16.6789	17.1297	16.6828
S1PR3	ENSG00000213694	1.72116	1.88848	1.85025	1.66718	1.61604	1.64214
RAB7B	ENSG00000276600	3.88259	3.28599	3.2408	2.9734	3.64731	3.20803
CCN2	ENSG00000118523	17.0702	17.4469	17.3374	20.7087	21.7042	21.3363
ETV5	ENSG00000244405	12.7791	12.4324	12.4004	12.3656	12.5723	12.2151
MAOB	ENSG00000069535	1.93212	2.78345	2.454	2.04521	1.86665	1.75289
LPCAT2	ENSG00000087253	4.00477	3.2705	3.93446	3.61677	3.80794	3.81766
AMOTL1	ENSG00000166025	5.97868	5.80343	6.15485	5.61012	5.71193	5.85652
XDH	ENSG00000158125	1.05537	0.883142	0.958977	0.283918	0.25358	0.268421
SFTPB	ENSG00000168878	3.28588	3.50717	3.41527	0.664109	0.769656	0.745477
CRISPLD2	ENSG00000103196	6.30371	6.06612	6.31431	8.10097	7.84112	7.66627
ITGB3	ENSG00000259207	2.62291	2.72355	3.3436	2.2387	2.20366	2.08409
EGR2	ENSG00000122877	0.235823	0.271208	0.232841	0.206858	0.140677	0.235831
IRS1	ENSG00000169047	11.7894	11.8294	11.1881	9.82429	9.1956	9.43711
BDKRB2	ENSG00000168398	2.40732	2.18627	2.21388	2.40481	2.1181	2.29402
DNAH5	ENSG00000039139	0.448188	0.441122	0.473829	0.577966	0.472091	0.547171
NHS	ENSG00000188158	4.13522	4.27224	4.33449	4.15016	4.1186	4.29392
RAPH1	ENSG00000173166	1.42217	1.34363	1.37292	1.08395	1.0169	1.05452
CCDC144B	ENSG00000154874	1.49648	1.60262	1.63198	1.37429	1.10502	1.51358
HS6ST2	ENSG00000171004	0.836168	0.800483	0.922048	0.621235	0.500654	0.497686
PLK5	ENSG00000185988	12.0778	12.2605	12.1524	12.5807	11.227	10.8234
LONRF3	ENSG00000175556	1.23454	1.41196	1.38235	1.00798	1.02199	0.841135
NFAT5	ENSG00000102908	5.31539	4.85824	5.4949	4.78271	4.26193	4.77831
KCNQ1OT1	ENSG00000269821	0.162169	0.151242	0.15094	0.161249	0.143306	0.147276
PLLP	ENSG00000102934	0.515205	0.494465	0.500203	0.414856	0.378529	0.390468
PLK3	ENSG00000173846	2.43855	2.6176	2.2559	2.10781	1.9412	2.07208
ANKRD36C	ENSG00000174501	1.1637	1.03323	1.13931	1.13135	0.773748	1.11113
MUC16	ENSG00000181143	1.83953	1.91956	1.798	1.99182	1.64391	1.96169
SELENOI	ENSG00000138018	10.0347	9.14739	11.0841	8.30808	8.56395	9.06307
ARRDC4	ENSG00000140450	3.0766	2.63682	2.94081	2.88425	3.23398	3.18215
PADI1	ENSG00000142623	0.616664	0.53082	0.432356	0.453923	0.35843	0.371038
FAM86C1P	ENSG00000158483	1.97204	1.89933	1.95336	1.87987	1.86263	1.71738
ZBTB20	ENSG00000181722	0.234578	0.228297	0.247014	0.254514	0.171576	0.236317
SCEL	ENSG00000136155	2.82817	2.73759	3.03155	1.25827	1.20154	1.08157
SYNE3	ENSG00000176438	0.63892	0.642832	0.589628	0.382606	0.359309	0.352108
CHML	ENSG00000203668	5.08582	4.96127	5.7676	5.34485	5.38308	5.73031
NBEAL1	ENSG00000144426	1.05858	1.0363	1.19923	0.999322	1.05218	1.14651
TATDN2P2	ENSG00000218226	1.69783	1.50645	1.72445	1.49029	1.30264	1.48395
CLDN2	ENSG00000165376	0.531683	0.674769	0.621289	0.430752	0.270406	0.238526
TMPPE	ENSG00000188167	1.44945	1.5209	1.23597	1.42214	1.47773	1.32149
RGPD6	ENSG00000183054	0.0943241	0.0712005	0.173732	0.113186	0.059211	0.0609353
GSN-AS1	ENSG00000235865	0.201017	0.147114	0.120288	0.176326	0.193707	0.140716
SRFBP1	ENSG00000151304	5.13474	4.24727	5.09209	4.26535	3.99662	5.06282
GAS7	ENSG00000007237	0.094255	0.147815	0.104343	0.0992135	0.116778	0.117822
MUC5AC	ENSG00000215182	0.0115524	0.00860561	0.0082091	0.00722011	0.00251803	0
TNS4	ENSG00000131746	4.64311	4.99167	4.82046	2.21465	2.40725	2.60343
PLCXD2	ENSG00000240891	0.763681	0.719465	0.718237	0.729972	0.822488	0.864222
CCDC144CP	ENSG00000154898	0.204165	0.294955	0.344672	0.345423	0.318249	0.282128
ZNF66	ENSG00000160229	2.66947	2.76589	2.69222	2.62358	2.25781	2.72143
CENPE	ENSG00000138778	6.91312	6.01934	6.7692	6.69133	6.32378	6.79431
ZNF860	ENSG00000197385	1.56589	1.67377	1.48361	1.28002	1.06618	1.16177
VN1R83P	ENSG00000268521	3.96339	5.2862	3.79807	4.2464	3.45553	4.84115
PFN1P3	ENSG00000234367	2.88311	2.73907	2.1378	2.50699	2.1858	2.26268
SLC5A4-AS1	ENSG00000242082	0.496069	0.603015	0.521916	0.512099	0.387316	0.569756
KCNIP4	ENSG00000185774	0.0237753	0.0236142	0.0608206	0.0297184	0.0621862	0
TFCP2L1	ENSG00000115112	0.581008	0.518295	0.550482	0.224149	0.164162	0.158437
RPL23AP64	ENSG00000240970	4.74956	4.83244	4.28051	4.44055	4.14096	4.29212
DOK7	ENSG00000175920	0.212254	0.186014	0.22003	0.208088	0.097971	0.0830315
SLC16A9	ENSG00000165449	6.96383	6.12957	6.5934	5.82307	6.20757	5.6805
SLC2A9	ENSG00000109667	0.0684257	0.090616	0.0864408	0.133047	0.106058	0.0938981
ST6GALNAC2	ENSG00000070731	0.486795	0.483497	0.572548	0.545534	0.526863	0.414628
HSD17B14	ENSG00000087076	4.39568	4.86099	4.89463	3.47417	3.08174	3.44414
YPEL3	ENSG00000090238	4.95838	4.97198	4.48474	4.38271	3.92248	4.04841
CHRD	ENSG00000090539	0.175077	0.143649	0.155781	0.145894	0.152643	0.238645
SLC7A8	ENSG00000092068	0.689721	0.818715	0.722019	0.567745	0.550007	0.455483
BIRC7	ENSG00000101197	0.42264	0.290614	0.332669	0.677292	0.765311	0.555952
RENBP	ENSG00000102032	3.64337	4.05879	4.05837	3.9592	3.77747	4.04599
DHDH	ENSG00000104808	1.7997	1.22303	1.40002	1.57865	1.81684	1.16984
ID3	ENSG00000117318	95.6634	97.5578	96.5095	106.861	110.218	110.852
SLC7A10	ENSG00000130876	0.0809896	0.0965289	0.0460406	0.13498	0.127101	0.123108
CHIA	ENSG00000134216	0.0108533	0	0	0	0.00946253	0.0206218
KCP	ENSG00000135253	0.382213	0.447555	0.434557	0.41573	0.473546	0.378402
AGT	ENSG00000135744	1.00363	1.08351	0.983222	1.395	1.40765	1.37557
CYP27A1	ENSG00000135929	1.36833	1.0906	1.25803	1.08394	0.95734	0.786392
GPNMB	ENSG00000136235	19.3086	18.5591	19.1882	14.3695	14.8705	15.2067
ARRB2	ENSG00000141480	10.6809	10.7024	10.3302	9.12701	8.76631	9.10328
ACKR3	ENSG00000144476	0.803346	0.797902	0.788816	1.39974	1.44326	1.34139
C16orf89	ENSG00000153446	1.02392	1.06541	1.28888	1.32051	1.36033	1.5981
FTCD	ENSG00000160282	7.35645	7.75961	8.15484	7.03751	7.47849	7.25442
SSTR5	ENSG00000162009	0.295987	0.183738	0.126196	0.0924937	0.290316	0.281196
DHRS3	ENSG00000162496	4.44422	4.67041	4.27864	3.33309	3.83724	4.15404
AQP7	ENSG00000165269	0.450868	0.419229	0.539882	0.647509	0.560368	0.583269
ART5	ENSG00000167311	0.201971	0.100301	0.0765437	0.196356	0.0880452	0.159898
SCARA5	ENSG00000168079	0.494713	0.491361	0.483982	0.498537	0.351075	0.404412
KLHL30	ENSG00000168427	0.093318	0.17213	0.106098	0.0999813	0.174343	0.240635
ATOH8	ENSG00000168874	0.997426	0.974515	0.952212	1.25579	1.35641	1.33383
CSDC2	ENSG00000172346	0.604096	0.516669	0.438807	0.978838	0.570579	0.781154
RND1	ENSG00000172602	0.548846	0.469062	0.442613	0.372271	0.5898	0.436537
NUPR1	ENSG00000176046	3.35762	2.90778	3.02692	2.79795	2.64022	2.97254
LRRC75B	ENSG00000178026	1.06026	1.05307	0.912468	1.22712	1.33524	1.21713
IGSF22	ENSG00000179057	0.0938199	0.134599	0.124447	0.234544	0.263571	0.178263
TMEM125	ENSG00000179178	0.117848	0.210689	0.200981	0.176768	0.164395	0.179134
HCAR2	ENSG00000182782	0.170819	0.55746	0.249703	0.447374	0.297861	0.440484
ADRA2C	ENSG00000184160	3.00639	3.26165	3.28665	4.22041	3.93173	3.29557
APOBR	ENSG00000184730	0.0928757	0.105424	0.0980527	0.143733	0.0231356	0.138654
BPIFB4	ENSG00000186191	0.0537034	0.0355597	0.0712346	0.0895037	0.0312146	0.0510198
MST1P2	ENSG00000186301	1.18776	1.44187	1.25039	1.24638	1.07391	1.00303
CYP4F8	ENSG00000186526	0.064339	0.0284013	0.0284473	0.0536146	0.0623273	0.0407493
IL17REL	ENSG00000188263	0.354487	0.297918	0.209268	0.318122	0.225854	0.297915
LDLRAD1	ENSG00000203985	0	0.0421298	0.0120566	0.0176735	0	0
LILRB3	ENSG00000204577	0.714872	0.629647	0.613415	0.584473	0.52919	0.615078
PRRT4	ENSG00000224940	0.164187	0.190253	0.194451	0.193827	0.202793	0.103988
LINC00689	ENSG00000231419	0.00550248	0.0109304	0.0125121	0.00458529	0.0047974	0.0156826
SMIM1	ENSG00000235169	0.964192	1.15927	0.692362	1.14178	0.61942	0.916011
ECEL1P2	ENSG00000244280	0.08851	0.0293034	0.117404	0.270441	0.18006	0.336349
TPSP2	ENSG00000260284	40.1481	44.4709	38.0388	29.8075	32.5548	32.3343
LINC01917	ENSG00000260433	0	0.0955613	0.0820424	0.040088	0.0209711	0
CDC37P2	ENSG00000261089	1.12635	1.31327	0.863014	1.79558	1.53707	1.58183
SSTR5-AS1	ENSG00000261713	0.037587	0.0373323	0.0427347	0.0417624	0.0218471	0.0714176
IGFL2-AS1	ENSG00000268621	1.1027	0.795162	0.815772	0.717491	0.671661	0.875387
IGFL1P1	ENSG00000268879	3.07949	1.80737	1.98934	1.51638	2.07469	1.32982
CYP4F23P	ENSG00000269516	0.159568	0.190185	0.235848	0.372318	0.19477	0.303189
ATP6V1FNB	ENSG00000272899	0.129775	0.090227	0.258209	0.140587	0.135775	0.110961
EXOC3L2	ENSG00000283632	0.0473755	0.0627392	0.0628409	0.0394787	0.0275365	0
ID2	ENSG00000115738	18.4215	18.2741	19.3134	18.4439	16.4581	17.2847
UCA1	ENSG00000214049	4.25794	4.24114	4.53075	6.61118	6.98045	6.765
ZNF114	ENSG00000178150	11.2186	9.28271	10.8636	12.8038	12.8276	12.8023
SPP1	ENSG00000118785	1.36926	1.5878	1.47776	1.0194	0.93929	1.0103
IGFN1	ENSG00000163395	2.49526	2.43704	2.14429	3.31307	3.12549	3.46893
GPX3	ENSG00000211445	31.9689	32.2746	31.002	35.5512	36.4732	37.1694
SLC7A5	ENSG00000103257	98.9958	102.38	98.4167	134.826	126.261	126.718
LYPD3	ENSG00000124466	5.37212	5.90378	5.19051	6.2469	5.8057	5.78287
NECAB2	ENSG00000103154	0.519859	0.189323	0.236422	0.303244	0.241731	0.296329
CDT1	ENSG00000167513	16.5234	17.3	16.2641	16.7664	18.131	16.0966
RAB26	ENSG00000167964	1.62031	1.48863	1.35864	1.7553	1.94244	1.94342
ZDHHC11B	ENSG00000206077	0.334197	0.390509	0.320364	0.950147	0.851268	0.896463
DUSP2	ENSG00000158050	4.54544	3.84004	4.66304	5.74698	5.53452	5.11247
ANG	ENSG00000214274	1.82097	1.70428	1.85137	1.98434	2.38144	2.229
ACP5	ENSG00000102575	22.8221	25.1537	22.4736	14.0118	13.5461	12.1201
APOE	ENSG00000130203	12.1183	12.9889	12.2885	10.8587	11.6873	11.4683
TRIM63	ENSG00000158022	0.058686	0.0194294	0.0333616	0.0163013	0	0.0185845
PNPLA7	ENSG00000130653	0.593747	0.594807	0.538304	0.644064	0.548903	0.510587
RASGRP3	ENSG00000152689	0.0656325	0.0419064	0.0426406	0.0507859	0.0613097	0.0668066
CD79A	ENSG00000105369	2.69956	2.23439	2.08881	5.06155	4.51114	4.80873
CKMT1A	ENSG00000223572	1.21579	1.02732	1.35135	0.998012	1.15492	0.930924
TMPRSS2	ENSG00000184012	0.0229436	0.159517	0.0869524	0.0509845	0.0533429	0.0435941
HPN	ENSG00000105707	0.551136	0.473428	0.677422	0.570984	0.467527	0.523595
EVI2A	ENSG00000126860	1.40431	1.34613	1.42026	1.44237	1.45215	1.62888
ANKRD33	ENSG00000167612	3.1029	3.55291	3.31988	1.70498	1.85473	1.95665
ITGA2B	ENSG00000005961	0.716721	0.650345	0.648884	0.670989	0.671169	0.655688
SMIM38	ENSG00000284713	0.556046	0.604054	0.523539	0.550242	0.439345	0.495244
METRNL	ENSG00000176845	3.62463	4.28316	3.9097	5.04959	5.34799	4.75028
FAM110D	ENSG00000197245	0.0540104	0.0178815	0.0204691	0.225038	0.172662	0.153934
YPEL4	ENSG00000166793	0.248569	0.190774	0.205535	0.282458	0.305375	0.354222
S1PR4	ENSG00000125910	0.606034	0.90289	0.585677	0.429264	0.607634	0.834837
TBXA2R	ENSG00000006638	1.46166	1.31012	1.56051	1.85674	1.72506	2.09987
GAL3ST1	ENSG00000128242	0.488449	0.452797	0.425764	0.366329	0.440055	0.572318
SCGB1D2	ENSG00000124935	0.110751	0	0.0629593	0.184581	0.0965594	0.105217
ROR2	ENSG00000169071	0.0857002	0.119167	0.0730778	0.121406	0.149437	0.13841
CLK2P1	ENSG00000232553	0.662024	0.696216	0.376345	0.746383	0.475335	0.406963
ENHO	ENSG00000168913	0.882345	0.730305	1.11465	0.816968	0.470117	0.698545
SPTBN4	ENSG00000160460	0.0856492	0.0850688	0.0754688	0.167726	0.119479	0.10578
PSG3	ENSG00000221826	0.578363	0.854301	0.885191	1.174	0.685265	0.859414
SHISAL1	ENSG00000138944	0.316189	0.423597	0.288429	0.349271	0.480825	0.328332
MAF	ENSG00000178573	0.223195	0.214532	0.192368	0.21599	0.182041	0.157321
RPL7P19	ENSG00000241458	3.83238	2.02469	1.80779	1.63076	2.91475	1.85917
DUSP26	ENSG00000133878	0	0	0	0.021305	0	0
VIPR2	ENSG00000106018	0	0.00975258	0	0	0.0085609	0.00932845
CACNG3	ENSG00000006116	0.184007	0.104434	0.283924	0.262862	0.412531	0.374598
GIP	ENSG00000159224	0.211138	0.0699026	0	0.234593	0.122722	0.468038
CFAP99	ENSG00000206113	0.0581666	0.0866587	0.0606216	0.0565496	0.0507132	0.0828901
SERHL	ENSG00000172250	0.106312	0.211182	0.23167	0.280538	0.139033	0.134666
LINC02019	ENSG00000273356	0.440316	0.413036	0.403276	0.407691	0.554514	0.348594
NPFF	ENSG00000139574	1.88029	1.79284	1.15441	1.88024	1.63935	1.14325
PLA2G4D	ENSG00000159337	0.401489	0.330686	0.467607	0.228484	0.162215	0.12094
FOXD3-AS1	ENSG00000230798	0.41715	0.662917	0.450566	0.660472	0.581915	0.594457
RASA4B	ENSG00000170667	0.193151	0.445348	0.298033	0.281672	0.22253	0.255588

## Sheet: Table S5F
Gene id	Gene name	EGF1/Ctrl	EGF2/Ctrl	EGF3/Ctrl	Alm-1/ctrl	Alm-2/ctrl	Alm-3/ctrl	shEGFR2-1/shNC	shEGFR2-2/shNC	shEGFR2-3/shNC		sig in Alm	sig in EGF	sig in shEGFR
ENSG00000006327	TNFRSF12A	2.21207	2.76467	2.38455	0.370858	0.369979	0.316666	0.809067	0.71456	0.69847		0.00102584	0.00125104	0.256383
ENSG00000035499	DEPDC1B	3.07079	2.22775	3.09823	0.417225	0.378461	0.606802	1.0245	0.984811	0.926017		0.0223771	0.0045707	0.926168
ENSG00000058866	DGKG	5.1995	5.08545	4.70037	0.398291	0.34739	0.474829	0.99095	0.906109	0.88914		0.018011	4.66784e-05	0.728686
ENSG00000065328	MCM10	5.43287	4.76843	5.64244	0.387125	0.39247	0.318771	0.974142	0.901653	0.91437		0.00483439	0.000114995	0.762367
ENSG00000078237	TIGAR	2.54131	1.58312	2.71934	0.206649	0.281174	0.258281	0.980769	0.951923	0.706731		6.73726e-05	0.0225423	0.626112
ENSG00000091127	PUS7	2.04343	1.63588	1.85911	0.457577	0.434596	0.516732	0.948735	0.827068	0.794258		0.0141401	0.0079099	0.547474
ENSG00000091136	LAMB1	2.34178	2.27876	2.17186	0.438091	0.369265	0.405692	0.715553	0.648084	0.59867		0.000107986	2.98504e-05	0.143361
ENSG00000091409	ITGA6	2.7753	2.04672	2.50405	0.429691	0.373472	0.534431	0.728957	0.680916	0.634066		0.0142103	0.00425961	0.22364
ENSG00000092853	CLSPN	6.33746	4.63764	5.72425	0.349248	0.316799	0.535451	1.02987	0.955423	0.948529		0.0342958	0.000980809	0.930714
ENSG00000106366	SERPINE1	3.19572	2.88965	2.72478	0.41693	0.480892	0.427662	1.21309	1.20796	1.08883		0.000433884	0.000187592	0.428204
ENSG00000111252	SH2B3	3.09299	2.67594	2.85644	0.437963	0.384328	0.407181	0.796887	0.694589	0.696071		0.000276723	0.000132104	0.259552
ENSG00000117525	F3	3.03641	2.25381	2.81535	0.349244	0.368368	0.381688	1.25766	1.20648	1.13962		0.000462115	0.00210194	0.449799
ENSG00000124882	EREG	2.48268	1.78247	2.14262	0.427729	0.371327	0.422432	0.600825	0.558203	0.536893		0.00615313	0.00788437	0.122308
ENSG00000133816	MICAL2	2.62943	2.53746	2.39896	0.463893	0.401194	0.362811	0.984874	0.884703	0.831906		0.000320644	4.26772e-05	0.655609
ENSG00000137440	FGFBP1	6.01813	6.76457	6.19615	0.113709	0.103144	0.0757969	0.832117	0.810219	0.481752		0.000215268	2.26789e-05	0.207712
ENSG00000137812	KNL1	3.33397	2.18794	2.9962	0.460366	0.295795	0.664895	1.09468	1.0108	0.860465		0.0873155	0.00990756	0.963712
ENSG00000142627	EPHA2	1.75171	2.05652	1.71882	0.383044	0.387291	0.323232	0.849501	0.799889	0.750554		0.000852826	0.00268506	0.33997
ENSG00000144063	MALL	2.87934	3.90606	2.94271	0.413448	0.457459	0.240771	0.61704	0.517489	0.44843		0.00796904	0.00304206	0.057254
ENSG00000144354	CDCA7	2.07557	1.71919	2.0079	0.45007	0.352119	0.556897	0.938994	0.926295	0.841882		0.0334879	0.00869696	0.654707
ENSG00000152413	HOMER1	2.29535	1.47163	2.12018	0.425764	0.304284	0.59342	0.917183	0.831269	0.75		0.0619885	0.0400118	0.573731
ENSG00000163661	PTX3	6.25114	5.72932	6.2274	0.296651	0.374543	0.392816	0.801782	0.895323	0.758352		0.00133462	1.07842e-05	0.453232
ENSG00000164171	ITGA2	3.37093	2.20007	2.7671	0.469404	0.331916	0.454039	0.612683	0.54517	0.546616		0.0191366	0.00847401	0.11499
ENSG00000164574	GALNT10	1.86464	1.77498	1.9109	0.418803	0.360285	0.366072	0.854489	0.808751	0.763362		0.000155574	0.00011601	0.401953
ENSG00000165490	DDIAS	3.55178	2.86266	3.42556	0.326961	0.444875	0.50206	0.997138	0.912343	0.886583		0.0133493	0.000758058	0.767655
ENSG00000165732	DDX21	2.41669	1.73509	2.29429	0.450679	0.375594	0.525176	0.866461	0.822005	0.773258		0.0204226	0.0104745	0.483854
ENSG00000166068	SPRED1	2.65927	1.71737	2.26476	0.243141	0.229936	0.294839	0.836524	0.826215	0.692194		0.0173705	0.021702	0.38803
ENSG00000168685	IL7R	3.70374	3.03548	3.33186	0.327889	0.293537	0.368564	0.726681	0.693858	0.660411		0.000458299	0.000310466	0.247169
ENSG00000169429	CXCL8	4.36967	3.46707	4.30579	0.136274	0.164818	0.469335	0.506394	0.445013	0.452685		0.060766	0.0015119	0.0780891
ENSG00000171793	CTPS1	2.90584	2.83439	2.90384	0.44149	0.372269	0.512939	0.975805	0.967599	0.857143		0.000215924	3.11359e-07	0.782362
ENSG00000174371	EXO1	4.7431	4.22104	4.6503	0.448949	0.34245	0.622334	0.952751	0.975405	0.869256		0.0126965	4.43886e-05	0.765869
ENSG00000175592	FOSL1	4.23038	4.82047	4.76684	0.24552	0.14969	0.21732	1.32318	1.23936	1.09366		0.000884403	6.33064e-05	0.314261
ENSG00000178409	BEND3	2.59902	2.36864	1.98973	0.581189	0.383411	0.440243	0.904762	0.926984	0.726984		0.00451997	0.00232289	0.49987
ENSG00000179041	RRS1	1.69245	2.01234	1.8689	0.497839	0.482321	0.419595	0.806823	0.781568	0.673903		0.00175994	0.00170761	0.235692
ENSG00000179388	EGR3	3.08596	2.85385	3.55169	0.0411372	0.0373152	0.0616987	0.567568	0.567568	0.72973		0.000119223	0.000546546	0.134702
ENSG00000181026	AEN	3.3726	3.56385	3.39144	0.325639	0.247158	0.219282	0.834134	0.856174	0.812942		0.000691535	1.26905e-05	0.4522
ENSG00000181649	PHLDA2	3.85833	4.52443	4.24171	0.153915	0.19759	0.187806	0.746497	0.660751	0.604708		3.74973e-05	8.30712e-05	0.164879
ENSG00000186871	ERCC6L	4.44241	3.36504	4.2903	0.43222	0.306	0.474332	1.10367	0.923356	0.962081		0.0370169	0.00140479	0.988861
ENSG00000187678	SPRY4	4.05538	3.86898	3.74103	0.180889	0.155133	0.210464	0.603613	0.572002	0.528349		6.22724e-05	8.98657e-06	0.11121
ENSG00000188064	WNT7B	2.12571	2.19831	1.97803	0.467134	0.375412	0.324702	0.76533	0.719051	0.649055		0.000677024	0.000170382	0.205878
ENSG00000189057	FAM111B	6.4515	5.07593	6.16574	0.22645	0.239645	0.584926	0.928789	0.885801	0.749023		0.0299349	0.000397296	0.582302
ENSG00000196083	IL1RAP	2.61482	1.8794	2.39029	0.447172	0.308693	0.44712	0.927202	0.833353	0.847818		0.00813652	0.00619205	0.595667
ENSG00000198768	APCDD1L	2.75261	2.81049	2.70115	0.378828	0.384059	0.349075	1.10855	1.03717	0.956877		0.000143899	5.1104e-06	0.883745
ENSG00000231290	APCDD1L-DT	2.62394	2.32888	2.30384	0.493336	0.438177	0.431618	1.15275	1.01186	0.920778		0.000461803	0.000235127	0.905642
ENSG00000237686	SCIRT	4.51452	5.71927	5.25343	0.303111	0.183299	0.20205	0.586364	0.395455	0.545455		0.00635174	0.000388679	0.0624098
ENSG00000240476	LINC00973	5.29303	6.86276	6.05624	0.296295	0.353639	0.452186	0.679558	0.621547	0.618232		0.000223069	0.000364741	0.174791
ENSG00000254827	SLC22A18AS	2.14587	2.77808	2.2402	0.420076	0.395703	0.274633	0.60687	0.59542	0.503817		0.00150584	0.00265015	0.0620109
ENSG00000276043	UHRF1	3.17035	3.63877	3.17133	0.47893	0.460639	0.316656	1.04997	1.00591	0.910725		0.00255394	0.000168178	0.955358
#N/A	Novel.23662	4.00826	4.03305	3.91383	0.132136	0.102736	0.0754972	0.488372	0.418605	0.139535		0.000922953	9.82209e-06	0.0286582
ENSG00000070731	ST6GALNAC2	0.387598	0.226719	0.27783	2.33054	2.22877	2.27701	0.991525	0.915254	0.661017		2.87362e-05	0.000574592	0.635259
ENSG00000087076	HSD17B14	0.314878	0.305603	0.294775	4.37504	4.86981	4.06564	0.698734	0.592405	0.607595		0.000237197	0.00870819	0.178557
ENSG00000090238	YPEL3	0.356163	0.415235	0.390338	1.86303	2.04576	1.95159	0.883762	0.755989	0.71606		0.000780633	0.00253814	0.276389
ENSG00000090539	CHRD	0.395871	0.193419	0.255256	2.69833	2.37033	1.47681	0.884615	0.884615	1.26923		0.042237	0.0155422	0.95917
ENSG00000092068	SLC7A8	0.459366	0.403294	0.478676	2.14646	2.26469	2.11738	0.734139	0.679758	0.516616		4.48377e-05	0.000322842	0.149202
ENSG00000101197	BIRC7	0.145506	0.109871	0.13464	2.00067	2.28312	1.96817	1.875	2.025	1.35		0.00310928	0.00323529	0.0568837
ENSG00000102032	RENBP	0.203681	0.177364	0.16462	3.55826	3.61294	2.77255	0.958609	0.874172	0.859272		0.00131577	0.00118588	0.670362
ENSG00000104808	DHDH	0.205366	0.326941	0.30015	2.15423	2.12071	1.55287	1.03448	1.13793	0.672414		0.0119737	0.00188534	0.840002
ENSG00000117318	ID3	0.364126	0.386215	0.352783	2.46352	2.64814	2.86259	1.05789	1.04289	0.962579		0.00020027	0.000320583	0.921968
ENSG00000130876	SLC7A10	0.107026	0.250021	0.0628484	2.25188	2.69394	2.12108	1.875	1.6875	1.5		0.0200741	0.056249	0.00532813
ENSG00000134216	CHIA	0.0151077	0	0.0473154	2.0823	2.39029	2.48741	0	3	6		0.00272186	0.00351086	0.373901
ENSG00000135253	KCP	0.267577	0.317801	0.289655	3.0548	3.02442	1.86901	0.937028	1.02015	0.748111		0.0141331	0.000559271	0.697652
ENSG00000135744	AGT	0.219227	0.294289	0.27741	2.05817	2.10705	1.958	1.31328	1.2666	1.13589		5.58418e-05	7.44744e-05	0.271487
ENSG00000135929	CYP27A1	0.201012	0.284816	0.235152	2.2874	2.25803	2.06505	0.833935	0.703971	0.530686		0.000218076	0.00036782	0.2527
ENSG00000144476	ACKR3	0.163207	0.120255	0.144274	1.95217	2.22514	1.53458	1.68293	1.65854	1.41463		0.0182482	0.00215403	0.0515346
ENSG00000153446	C16orf89	0.153537	0.24331	0.366969	2.11915	2.1279	2.14847	1.08939	1.07263	1.15642		7.52323e-05	0.00122735	0.724504
ENSG00000160282	FTCD	0.307544	0.337493	0.303327	1.97131	2.06875	1.7703	0.858425	0.871884	0.776171		0.000534338	2.41744e-05	0.516384
ENSG00000162009	SSTR5	0.0293973	0.0610437	0.138102	2.3307	3.48022	1.68508	0.473684	1.42105	1.26316		0.0475034	0.000334496	0.878996
ENSG00000162496	DHRS3	0.364983	0.438853	0.42025	1.84784	2.10076	1.91308	0.71969	0.791917	0.786758		0.000936198	0.00188692	0.261755
ENSG00000165269	AQP7	0.120042	0.0918357	0.105531	2.21427	2.37903	2.17035	1.27895	1.05789	1.01053		5.06629e-05	3.9429e-06	0.713604
ENSG00000167311	ART5	0.203811	0.211608	0.212769	3.14887	2.93148	3.31422	1.61538	0.692308	1.15385		0.0033079	0.0697948	0.67018
ENSG00000168079	SCARA5	0.307389	0.270465	0.256992	2.29408	2.30575	1.86809	0.975	0.65625	0.69375		0.00161007	0.000149631	0.360932
ENSG00000168427	KLHL30	0.363017	0.484591	0.243626	2.40369	2.26643	1.89743	0.794118	1.32353	1.67647		0.00205666	0.00306129	0.455714
ENSG00000172346	CSDC2	0.116572	0.144259	0.0995692	2.90262	3.37813	2.57917	1.85841	1.0354	1.30088		0.00167533	0.00170657	0.213279
ENSG00000172602	RND1	0.289493	0.381207	0.375929	1.98944	2.11709	2.29061	0.744681	1.12766	0.765957		0.000489594	0.000836119	0.574421
ENSG00000178026	LRRC75B	0.22342	0.29248	0.342255	2.04385	2.41283	2.00807	1.18577	1.2332	1.03162		0.00165161	0.00129429	0.396709
ENSG00000179057	IGSF22	0.180227	0.147728	0.163393	2.04789	1.92059	2.23853	1.88372	2.02326	1.25581		0.000702457	0.000225788	0.102008
ENSG00000179178	TMEM125	0.15651	0.162497	0.200523	2.20403	2.42429	2.09966	0.931034	0.827586	0.827586		0.00064053	0.00068215	0.672154
ENSG00000182782	HCAR2	0.250945	0.202646	0.218312	1.70048	1.94353	2.10835	1.375	0.875	1.1875		0.00972027	0.00812952	0.680856
ENSG00000184160	ADRA2C	0.331754	0.371728	0.380627	1.88704	2.82378	2.06709	1.25862	1.12069	0.862069		0.0133025	0.00126817	0.762044
ENSG00000184730	APOBR	0.181783	0.210514	0.14233	1.89321	2.52955	2.25112	1.39286	0.214286	1.17857		0.0029343	6.56727e-05	0.871219
ENSG00000186191	BPIFB4	0.102879	0.106814	0.103565	4.78635	4.73191	3.67448	1.5	0.5	0.75		0.000914421	0.00252109	0.872158
ENSG00000186301	MST1P2	0.305552	0.415937	0.342906	2.0084	1.88565	1.74731	0.927273	0.763636	0.654545		0.00240649	0.00415027	0.344847
ENSG00000186526	CYP4F8	0.0664953	0.0690391	0.0312382	2.83873	2.82513	2.12475	1.35	1.5	0.9		0.00316836	0.000448542	0.426686
ENSG00000188263	IL17REL	0.053294	0.126475	0.0476885	2.73019	2.79663	1.78278	1.12	0.76	0.92		0.0150311	0.00210659	0.610239
ENSG00000203985	LDLRAD1	0	0.0938908	0.212414	3.14362	2.9516	2.31608	1	0	0		0.00510648	0.0139986	0.373901
ENSG00000204577	LILRB3	0.341474	0.436353	0.411327	2.45099	1.97624	1.3615	0.866667	0.75	0.8		0.0451467	0.00134468	0.32267
ENSG00000224940	PRRT4	0.152867	0.10581	0.199483	1.98888	2.48063	2.61011	1	1	0.470588		0.00318339	0.00128476	0.583239
#N/A	ENSG00000228873	0.0737762	0	0.0577643	2.96959	3.6732	3.41912	1.3	1.6	0.8		0.000346853	1.40971e-05	0.497012
ENSG00000231419	LINC00689	0.0846577	0.0439481	0.115997	2.27172	2.24799	1.67778	0.428571	0.428571	1.28571		0.0057364	2.89772e-05	0.579015
#N/A	ENSG00000234537	0.107872	0.291197	0.320949	3.02624	2.43476	1.73659	1.17647	1.47059	1		0.0211971	0.00162654	0.538441
ENSG00000235169	SMIM1	0.0743952	0.0944059	0.103554	2.14757	2.33216	2.14732	1.22727	0.636364	0.863636		0.00195641	0.00432516	0.64986
ENSG00000244280	ECEL1P2	0.0609788	0.126623	0.143233	2.08258	2.9011	2.15671	3	1.90909	3.27273		0.00737053	0.000548722	0.0533006
ENSG00000260284	TPSP2	0.247725	0.323339	0.254919	3.85325	3.98859	2.72199	0.706746	0.737758	0.67247		0.00371301	0.00257117	0.147652
ENSG00000260433	LINC01917	0.238688	0.24782	0.213583	2.66182	2.52769	1.91296	0.6	0.3	0		0.00897672	0.0113703	0.277069
ENSG00000261089	CDC37P2	0.356183	0.422639	0.517919	1.44816	1.764	2.48228	1.62963	1.33333	1.25926		0.0519136	0.0109737	0.0453642
ENSG00000261713	SSTR5-AS1	0.162659	0.0562937	0.0424521	2.97601	2.45955	2.51278	1	0.5	1.5		0.0023616	0.00709305	1
ENSG00000268621	IGFL2-AS1	0.136007	0.131972	0.125398	2.24653	2.01671	2.46794	0.773756	0.692308	0.828054		0.00129766	0.000479558	0.236952
ENSG00000268879	IGFL1P1	0.0833064	0.10015	0.11672	2.37451	2.35764	2.16034	0.65	0.85	0.5		0.000398223	0.000759079	0.182331
ENSG00000269516	CYP4F23P	0.227437	0.246404	0.178075	2.50877	2.35227	2.07432	1.75	0.875	1.25		0.000520766	1.06523e-05	0.510249
ENSG00000272899	ATP6V1FNB	0.354569	0.284467	0.328092	2.24104	2.10415	2.04422	0.75	0.692308	0.519231		0.000475876	0.00192309	0.539614
ENSG00000283632	EXOC3L2	0.123499	0.064112	0.16116	2.15913	2.11794	2.3597	0.642857	0.428571	0		0.000867401	0.00163195	0.114477
#N/A	Novel.11113	0.217849	0.303561	0.260341	2.86346	2.85748	2.03111	0.795276	0.695538	0.645669		0.00465747	2.79612e-05	0.141221
#N/A	Novel.1708	0.177634	0.256152	0.154535	2.01018	1.97628	1.73313	0.6	1	1		0.00890314	0.00949941	0.81899
#N/A	Novel.33274	0.123253	0.201092	0.165433	1.78255	1.81174	2.19035	0.8	1.2	0.5		0.00468912	0.00107297	0.589832
#N/A	Novel.33276	0.108711	0.184696	0.162496	2.14568	2.39464	1.92848	1.25806	1.30645	1.01613		0.0016433	0.00036813	0.470358
ENSG00000103044	HAS3	5.01414	5.02003	4.79443	0.439886	0.39076	0.364001	0.888826	0.853659	0.779921		5.38888e-05	9.25473e-07	0.447253
ENSG00000104549	SQLE	4.93043	3.57511	4.75483	0.33271	0.313156	0.534777	0.947612	0.927966	0.899076		0.00840838	0.00145051	0.766974
ENSG00000110092	CCND1	3.79456	3.47671	3.43127	0.177559	0.189695	0.179792	0.739842	0.704123	0.640497		0.000107028	3.43944e-05	0.217585
ENSG00000130164	LDLR	3.37548	3.76805	3.24289	0.523756	0.48723	0.346363	0.768404	0.711943	0.674909		0.00595629	0.000166253	0.215062
ENSG00000159339	PADI4	2.39722	2.61826	2.39099	0.459951	0.48427	0.455791	0.721992	0.821577	0.572614		0.000120141	5.83647e-05	0.171667
ENSG00000167772	ANGPTL4	7.98103	9.04069	8.22266	0.228263	0.200965	0.181246	0.51631	0.452193	0.435321		0.000430862	2.29149e-05	0.0283184
ENSG00000136235	GPNMB	0.190681	0.152253	0.167571	2.85488	2.47952	2.76915	0.721013	0.713164	0.669283		0.000147544	4.12094e-05	0.221282
ENSG00000141480	ARRB2	0.290092	0.321803	0.281108	1.94744	2.04963	1.84699	0.829159	0.761181	0.725403		0.000384512	0.000396622	0.296843
ENSG00000168874	ATOH8	0.0953339	0.0694603	0.0903576	2.293	2.50187	2.13771	1.23739	1.27745	1.15282		0.000341176	4.15696e-05	0.309317
ENSG00000176046	NUPR1	0.389884	0.415395	0.462693	2.0653	2.4945	3.0534	0.867612	0.782506	0.808511		0.006066	0.000358033	0.401198
